# Supplementary material for: Multi-omics profiling identifies a deregulated FUS-MAP1B axis in ALS/FTD–associated UBQLN2 mutants
Source: Life Sci Alliance. 2022 Jul 1;5(11):e202101327. doi: 10.26508/lsa.202101327 (PMC9258132; doi:10.26508/lsa.202101327)
Supplement: Supplementary file 1 [file LSA-2021-01327_TableS1.xlsx]

## Sheet: LCL_P497S
LFQ intensity Ctrl1	LFQ intensity Ctrl2	LFQ intensity Ctrl3	LFQ intensity Ctrl4	LFQ intensity P497S_1	LFQ intensity P497S_2	LFQ intensity P497S_3	p-value	q-value	Log2FC	Gene names	Majority protein IDs
21.2703	21.731	20.952	21.674	28.8313	29.1413	29.3297	6.57814e-07	0	7.69392	HLA-DRB1	P13760
28.8008	29.0211	28.8346	28.9545	26.9029	26.9495	26.9938	7.45701e-07	0	-1.95404	IFIT1	P09914
25.9781	26.0275	25.8464	26.0712	20.7284	21.0897	20.3981	8.16992e-07	0	-5.24204	CA2	P00918
32.6109	32.6304	32.5956	32.5026	33.5755	33.6189	33.6286	1.03992e-06	0	1.02284	HSP90B1	P14625
21.9659	21.6886	22.2556	22.1435	26.883	26.4019	26.5751	2.09579e-06	0.0096	4.60657	MAP1B	P46821;D6RA32;D6RA40
28.7874	28.9148	28.7254	28.8278	27.6321	27.6659	27.6424	2.12672e-06	0.008	-1.16701	STAT6	P42226;A0A1W2PNW1
30.666	30.5495	29.8093	30.4708	35.5056	35.6001	35.6444	3.13574e-06	0.012	5.20945	IGHM	A0A1B0GUU9;P01871
26.9727	26.8637	26.8733	26.7819	25.5755	25.6632	25.5259	3.23281e-06	0.0105	-1.28472	DFNA5	O60443;H7C3W1
27.455	27.4139	27.4578	27.3386	26.6967	26.7471	26.7191	6.02817e-06	0.00933333	-0.695324	WDFY4	Q6ZS81
24.9923	25.325	24.962	25.1345	29.1148	28.5367	29.1692	6.36773e-06	0.0084	3.8368	HLA-B	P30491;P10319;A0A140T9G0
20.7362	21.4659	21.1352	20.6847	26.3074	25.6938	26.1659	7.59935e-06	0.00763636	5.05019	HLA-B	Q29718
25.4731	25.5753	25.587	25.167	27.8961	27.8551	27.6978	8.03226e-06	0.007	2.36573	NCF2	P19878
26.2076	26.319	26.4752	26.5955	23.41	22.8908	23.3909	9.2883e-06	0.00646154	-3.16878	FHIT	P49789
27.6859	27.6668	27.7754	27.5809	28.6406	28.7616	28.6712	9.55786e-06	0.006	1.01391	ACSL1	E7EPM6;P33121;B7Z3Z9
32.0132	31.8564	31.8757	31.7965	32.9565	32.834	32.899	1.54978e-05	0.0056	1.01109	HSPA5	P11021
26.3273	26.3588	26.4366	26.3068	25.5217	25.3252	25.4077	1.68997e-05	0.00525	-0.939171	AKAP2	Q9Y2D5;C9JVY5
21.461	20.2331	20.9762	21.1559	25.8319	26.127	26.2079	1.86534e-05	0.00494118	5.09906	HLA-C	P30504
28.6934	28.6154	28.6077	28.6533	29.0594	29.0938	29.1296	1.92423e-05	0.00466667	0.451818	IL4I1	Q96RQ9
30.5682	30.26	30.1937	30.2644	28.6547	28.8008	28.6568	2.30274e-05	0.00442105	-1.61746	UCHL1	P09936;D6RE83;D6R956;D6R974
27.8763	28.0334	28.0964	27.6737	25.594	25.7301	25.9674	2.41314e-05	0.0042	-2.15614	AK4	P27144;D3DQ64
28.9382	28.9336	28.721	28.678	26.7123	26.8945	26.4032	2.53644e-05	0.004	-2.14772	IFIT3	O14879
28.9326	28.7996	28.843	28.8239	29.5592	29.7116	29.5832	2.66599e-05	0.00381818	0.768259	EHD1	Q9H4M9;A0A024R571;C9JC03;C9J2Z4
28.2027	28.4941	28.2977	28.2882	26.7203	26.9755	26.6807	2.93028e-05	0.00365217	-1.5285	MX2	P20592
24.2445	23.9939	23.9471	23.8026	22.2421	21.9368	22.191	3.42334e-05	0.0035	-1.87375	PLEKHF1	K7ELB8;Q96S99;K7EIX0
26.8585	27.1364	26.7849	26.8373	24.3471	23.9857	24.6572	3.65538e-05	0.00336	-2.57429	TGM2	P21980
27.7813	27.7257	27.8352	27.6767	28.7672	28.7119	28.5528	3.7223e-05	0.00323077	0.922563	STAT3	P40763;G8JLH9
28.9434	28.8619	28.7658	28.8536	29.5158	29.4947	29.6047	4.33294e-05	0.00311111	0.682216	COPG1	Q9Y678
28.4719	28.4739	28.1253	28.6827	26.4291	26.0087	26.1245	4.68483e-05	0.003	-2.25103	TCL1A	P56279
24.291	23.877	23.7432	23.9228	21.9629	22.1144	21.8475	4.8661e-05	0.00289655	-1.98359	SLBP	H0YAE8;E7EUV9;F8W8D3;Q14493;H7C4H8
28.9066	29.0029	28.8232	28.9059	29.6281	29.8072	29.6858	5.04808e-05	0.0028	0.79741	RPN1	P04843;B7Z4L4
30.4026	30.4649	30.6691	30.1827	31.99	32.0915	31.9419	5.3436e-05	0.00270968	1.57795	LMNA	P02545
19.0172	17.5627	21.1222	19.175	29.9912	30.343	30.4332	5.47103e-05	0.002625	11.0365	JCHAIN;IGJ	D6RD17;P01591;D6RHJ6
28.0649	28.0339	27.862	27.7973	26.8847	26.9712	26.8642	5.52503e-05	0.00254545	-1.03282	XPNPEP1	Q9NQW7;Q5T6H7
24.2281	23.5983	24.0434	24.0565	26.1677	26.3398	26.0447	5.54681e-05	0.00247059	2.2025	PAK1	Q13153;E9PM17;B3KNX7
25.2652	25.5506	25.3786	25.4811	24.3114	24.184	24.4059	6.37049e-05	0.0024	-1.11846	PTPN23	Q9H3S7
23.481	23.5429	23.9053	23.8107	22.1329	22.1332	22.2572	7.16715e-05	0.00233333	-1.51049	BCL7A;BCL7B	Q4VC05;F8WE18;F8WDZ4;F2Z3H6;Q9BQE9
24.8398	24.6607	24.4676	24.541	23.4456	23.2441	23.3232	7.23322e-05	0.00227027	-1.28965	ZC3H12D	A2A288
28.3171	27.8054	28.6318	27.9605	25.2415	25.5341	25.4748	7.28749e-05	0.00347368	-2.76193	F13A1	P00488
26.7979	27.1521	26.8397	26.995	25.7969	25.679	25.7951	7.73723e-05	0.00492308	-1.18916	DBN1	Q16643;D6R9W4
28.1102	27.8261	27.9067	28.2083	29.2158	29.3134	29.322	7.94818e-05	0.0048	1.27091	PNP	P00491;G3V5M2
27.3974	27.4785	27.0786	27.3462	24.5026	25.2592	24.7551	7.99965e-05	0.00468293	-2.48623	IFIT2	A0A087X279;P09913
24.4812	24.3598	24.1789	24.1658	25.4473	25.6813	25.5058	8.23122e-05	0.00457143	1.24838	OXA1L	E7EVY0;S4R3Q9;J3KNA0;Q15070;C9JC63
27.0664	27.0737	26.8415	26.8575	28.2815	28.6597	28.3186	8.34282e-05	0.00446512	1.46019	FDXR	P22570;A0A0C4DFN8;A0A0A0MSZ4;A0A0A0MTR6;A0A0A0MT64;A0A0A0MTN9;A0A0C4DGN7
28.9817	29.0646	28.7984	28.5098	27.218	27.0919	27.0981	9.11311e-05	0.00627273	-1.70261	SOD1	P00441;H7BYH4
26.5146	26.4091	26.7332	26.3237	27.7026	27.8815	27.7607	9.37356e-05	0.00613333	1.28644	BLVRA	P53004
25.8901	25.7788	25.6987	25.661	24.8701	25.022	24.9766	9.43958e-05	0.006	-0.800924	TJP2	A0A1B0GTW1;Q9UDY2
27.3547	26.8854	26.9973	26.9819	28.5881	28.6103	28.4098	0.000101482	0.00587234	1.48122	TYMP	P19971;C9JGI3
24.294	24.6558	24.4555	24.2637	22.9375	23.0976	22.7521	0.000108142	0.00575	-1.48818	TMOD1	P28289
22.0465	22.0212	21.9841	21.6422	23.2845	23.6013	23.379	0.000110389	0.00563265	1.49808	LAT2	C9JA24;Q9GZY6;C9JXP0
26.7652	27.2784	26.8252	27.1486	25.3641	25.4267	25.2998	0.000111588	0.00552	-1.6408	ADD3	Q9UEY8
25.7486	26.2767	25.3297	25.9984	28.3951	28.4884	28.3766	0.000119172	0.00541176	2.5817	SERPINB1	P30740
26.732	26.6432	26.814	26.4751	27.7603	27.996	27.742	0.000127729	0.00530769	1.16671	LACTB	P83111
28.0709	28.0449	28.112	28.0701	27.6745	27.6473	27.5189	0.000127798	0.00520755	-0.460913	PPIF	P30405;H0Y548
20.0833	20.6667	21.8863	19.8471	26.331	26.2153	26.5445	0.000133051	0.00511111	5.74277	HLA-DQA1	Q5Y7H0
29.058	28.86	29.1833	28.988	26.8059	26.0787	26.9158	0.000144296	0.00538182	-2.42218	HLA-DQA1	Q5Y7D2;P01909
30.8643	30.9246	30.8466	30.8478	30.4769	30.4629	30.5699	0.000145044	0.00528571	-0.367588	EIF3A	Q14152
26.6488	26.8459	26.7515	26.6705	27.3002	27.2683	27.3463	0.000152568	0.00519298	0.575747	SLC25A11	I3L1P8;Q02978
29.5391	29.4181	29.612	29.4775	28.9636	28.8115	28.8906	0.000159341	0.00510345	-0.623102	SEPT6	B1AMS2;Q14141
24.6483	25.0249	24.6563	24.7086	23.2344	23.5058	23.0934	0.00016185	0.00501695	-1.48167	PTGES3L-AARSD1;AARSD1	C9J5N1;Q9BTE6
29.5545	29.4603	29.2651	29.5312	28.4803	28.609	28.6363	0.000168691	0.0054	-0.877563	IFI44	Q8TCB0;C9JUM8
23.8593	23.7113	23.9475	24.4966	22.0163	21.8653	21.9352	0.000169226	0.00531148	-2.06477	STOM	P27105
24.6666	24.7626	24.9355	24.5958	23.8266	23.8881	23.8626	0.000172826	0.00574194	-0.881023	FKBP15	A0A0A0MT60;Q5T1M5
26.4192	26.5541	26.5001	26.0799	24.9718	24.9727	25.158	0.00017582	0.00565079	-1.35415	UAP1L1	Q3KQV9
24.7959	25.2144	25.3938	25.1768	23.3138	23.6411	23.4697	0.000177933	0.0055625	-1.67035	CNN3	Q15417;E9PDU6
24.1727	23.997	24.1925	24.0749	25.33	25.8754	25.8607	0.000178831	0.00547692	1.57941	HLA-B	P30462
22.0273	21.2691	20.8037	21.7053	24.6953	24.6685	24.4847	0.000179006	0.00539394	3.16485	CD86	H7C4F8;P42081;C9JXS1
26.4968	26.6607	26.3059	26.441	23.7166	24.6171	23.9191	0.000188741	0.00579104	-2.39186	ADI1	Q9BV57;A0A0G2JQN5
24.3788	24.6012	24.532	24.2725	22.4806	22.4822	23.0517	0.000191393	0.00570588	-1.77459	ISYNA1	Q9NPH2
29.4045	29.2517	29.4817	29.3997	28.3595	28.3706	28.6395	0.000195225	0.00562319	-0.927868	RANBP1	P43487;F6WQW2;C9JXG8;C9JJ34;C9JGV6
27.2128	24.9997	26.747	27.114	32.435	32.4248	32.5224	0.000195521	0.00554286	5.94235	IGLL5;IGLC1	A0A0B4J231;B9A064;P0CG04
25.797	25.9815	25.8634	25.9221	24.7572	24.7086	25.0768	0.000195778	0.00546479	-1.0435	TST	Q16762
26.0138	26.3807	26.1787	26.2055	24.8676	24.9277	24.4754	0.000197939	0.00538889	-1.43777	IL16	Q14005;H0YLH9
25.1589	24.7408	24.9038	24.7962	23.6941	23.8491	23.634	0.000206042	0.00531507	-1.17416	FGD2	Q7Z6J4
27.472	27.6893	27.5609	27.4787	26.7153	26.8585	26.8973	0.000207739	0.00524324	-0.726529	SH3KBP1	Q96B97;Q5JPT2;Q5VSN0
23.9781	24.3724	24.3897	24.2755	22.341	21.4298	21.899	0.000212291	0.00517333	-2.36398	HMG20A	Q9NP66;H0YKM5
27.7973	28.0031	28.0344	28.0329	29.1569	29.35	28.9117	0.000238523	0.00552632	1.17261	COTL1	Q14019;H3BT58
22.6056	23.2263	23.1965	23.3228	24.9561	25.0921	24.8466	0.000241527	0.00545455	1.87715	TM9SF2	Q99805
24.4179	24.3707	24.31	24.3211	23.7649	23.645	23.8804	0.00024876	0.00569231	-0.591489	SETD3	Q86TU7
27.661	27.7618	27.8345	27.8064	26.8793	26.9705	27.1602	0.000249699	0.00562025	-0.762597	LY75	O60449
24.1635	24.6368	24.716	24.3935	25.8271	25.8967	25.835	0.000252197	0.00555	1.37549	SURF4	Q5T8U5;O15260
29.0923	28.7641	28.8051	28.8648	28.0269	28.0134	27.8415	0.000253165	0.00548148	-0.92101	CD48	A0A087X1S7;P09326
27.6609	27.5777	27.157	27.3081	26.1714	25.9205	25.9473	0.000255418	0.00541463	-1.41287	LCK	P06239;Q573B4;E9PAP0;E9PJ92
22.8758	23.6332	23.5213	22.8429	25.6818	25.4237	25.5241	0.000264372	0.0059759	2.32489	ANXA1	P04083;Q5T3N1
25.227	25.4531	25.588	25.3308	24.5917	24.4873	24.5307	0.000278749	0.00714286	-0.86316	NCAPH	E9PHA2;Q15003;C9J470
25.7658	25.8772	25.5036	25.6345	26.8407	26.6295	26.9686	0.00030849	0.00757647	1.11769	APOL2	J3KQL8;Q9BQE5;E9PM95
30.5286	29.9673	30.0827	30.1648	28.8038	28.9356	28.9138	0.000309727	0.00748837	-1.3015	HINT1	P49773
29.6451	29.3676	29.4558	29.222	28.2546	27.9798	28.3555	0.000328695	0.00878161	-1.226	GATM	P50440
24.2691	23.5737	23.8961	24.4763	21.685	22.0275	21.8988	0.000332359	0.00868182	-2.18336	DPP4	P27487
26.4895	27.6004	28.8951	27.0446	20.6032	21.8755	19.952	0.000335021	0.00858427	-6.6972	HLA-A	P01891
26.5865	26.649	26.7477	26.6668	27.028	27.0006	27.0699	0.000338947	0.00848889	0.37034	ICAM1	P05362;K7EKL8
21.928	21.295	22.1264	20.7925	25.0597	25.1445	24.5501	0.000346818	0.0083956	3.38261	HLA-DRB4	X5D2U9;P13762;A0A0G2JJQ8
29.1717	29.3049	29.3137	29.0513	28.5174	28.2557	28.3085	0.000360833	0.00830435	-0.849893	HADH	A0A0D9SFP2;Q16836;A0A0A0MSE2;E9PF18;A0A1W2PNM1;A0A1W2PQV5;A0A1W2PQ78;A0A1W2PQC2;A0A1W2PRT2
23.5052	23.5635	23.5321	23.4183	23.9761	24.1716	23.9946	0.000371348	0.00847312	0.542719	NDUFB2	H7C5B8;O95178;C9IZW8;C9JXM4
24.6068	23.982	24.4122	24.2065	26.4418	26.1791	25.8262	0.000376418	0.00838298	1.84714	TRAF1	Q13077
24.5531	25.3835	25.1131	24.6953	22.1736	21.2199	20.7125	0.000386295	0.00829474	-3.56758	KRAS	P01116
25.731	25.6598	25.7679	25.7864	25.2363	25.3921	25.2586	0.000391352	0.00858333	-0.440614	HGS	O14964
28.4405	28.2586	28.5442	28.2874	29.3824	29.1073	29.3608	0.000412354	0.00969072	0.900839	MVP	Q14764
28.5592	28.6707	28.9921	28.6502	26.9264	25.8692	26.4125	0.000413287	0.00959184	-2.31536	FCER2	K3W4U1;P06734
27.6435	27.7161	27.8729	27.5808	26.4435	26.8272	26.3745	0.000417766	0.00949495	-1.15491	ARHGAP17	Q68EM7
23.3236	23.5072	22.6704	23.4601	21.2501	20.6099	20.9852	0.000421725	0.00972	-2.29193	DYNC1I2	E7EQL5;E7EV09;E9PGG1;E7ETL8;E7EQU2
30.2042	30.5554	30.2	30.2035	31.3121	31.4434	31.1718	0.00042393	0.00982178	1.01835	PDIA4	P13667
30.049	30.0653	29.4714	29.7772	31.2369	31.165	31.2456	0.000426691	0.00972549	1.37509	TXNDC5	Q8NBS9
23.375	23.2373	23.6815	23.5217	24.4631	24.4237	24.3498	0.000430832	0.00963107	0.958335	EMC7	H0YDT8;Q9NPA0
30.8439	30.837	30.8029	30.8206	31.0608	31.0263	31.1412	0.000437468	0.00953846	0.24999	TLN1	Q9Y490
27.186	27.4475	27.3083	27.1962	26.0997	26.0879	26.4797	0.000440385	0.00967619	-1.06205	PPP2R2A	P63151
28.1107	27.9546	27.8066	28.1387	26.3099	25.8972	26.6767	0.000447728	0.00958491	-1.70809	CPNE1	F2Z2V0;B0QZ18;Q99829;A6PVH9;E7ENH5;Q5JX45;Q5JX58;Q5JX59;Q5JX60;Q5JX44
31.14	31.0776	30.8947	31.0145	30.4683	30.4822	30.5483	0.000452096	0.00971963	-0.532096	FLNA	Q60FE5;P21333;Q5HY54;A0A087WWY3
23.9127	24.1638	23.9461	24.0757	22.6381	23.114	22.6094	0.000471882	0.00996296	-1.23741	LCMT1	Q9UIC8;I3L4A2
20.8433	21.1862	21.658	21.5343	23.094	23.0745	23.0209	0.000475041	0.00987156	1.75771	FBXO6	Q9NRD1;J3KQ72
24.6186	24.4944	24.7723	24.7886	23.879	23.8987	24.028	0.000478604	0.00978182	-0.733208	PTRHD1	Q6GMV3
23.7671	23.7098	23.5573	23.4549	22.4284	22.3776	22.7855	0.000493271	0.00969369	-1.09179	UBL4A	P11441;Q5HY81
32.7121	32.7015	32.5012	32.5671	31.826	31.5966	31.9405	0.000499477	0.00989286	-0.83276	HNRNPA2B1	P22626;A0A087WUI2
20.3751	21.7782	21.5312	20.7022	24.705	24.1238	24.8679	0.000510319	0.00980531	3.4689	LYN	P07948
29.499	29.3737	29.214	29.4087	30.0288	30.2828	30.0837	0.000511463	0.0097193	0.757921	PDIA6	Q15084
25.3219	25.7367	25.624	25.786	24.1518	24.5598	24.1486	0.000516894	0.00963478	-1.3304	HS2ST1	Q7LGA3
28.3142	28.1448	28.1843	28.0546	28.6714	28.7735	28.7062	0.000516911	0.00955172	0.542566	MANF	A8K878;P55145
26.1216	26.5068	25.5707	25.8456	24.2153	23.819	23.9228	0.000523453	0.00974359	-2.02548	LGMN	Q99538;G3V4P5;G3V3Z4;G3V2T4;G3V4E4
27.071	27.0403	26.9062	26.6012	27.8682	27.9924	28.0669	0.000528707	0.00966102	1.07114	APOBEC3G	Q9HC16
27.4993	25.2175	25.6686	27.4055	20.7508	21.1317	20.2099	0.000531374	0.00957983	-5.75026	HLA-A	P18462
28.03	28.1868	28.2075	28.0962	27.7463	27.6557	27.621	0.000532157	0.0095	-0.45578	SMC3	Q9UQE7
25.3622	25.4777	25.4437	25.59	24.2375	24.711	24.4499	0.000534351	0.00942149	-1.00226	NUB1	H3BM14;H3BM74;Q9Y5A7;C9JRT6;F8WDB6
26.3488	26.3161	26.2066	26.2273	25.8061	25.7295	25.9049	0.000537145	0.00934426	-0.461221	FAF1	Q9UNN5;B1ANM7;B3KT28
26.3425	26.0727	25.8108	26.3251	27.4409	27.2624	27.5581	0.000558821	0.0099187	1.2827	ITGB2	P05107;D3DSM0;J3KNI6
25.7693	25.9473	26.2352	26.0387	24.9933	24.5624	24.5648	0.000561595	0.00983871	-1.29078	PHF5A	Q7RTV0
24.1699	24.7254	24.3644	23.9693	26.4657	25.924	26.0263	0.00056696	0.00976	1.83139	CAPN2	P17655
29.7039	29.9954	30.0296	29.7893	28.9305	29.1399	28.8661	0.00057376	0.00968254	-0.900717	SERBP1	Q8NC51
28.3896	28.4565	28.4169	28.3906	28.6578	28.7799	28.6704	0.000574124	0.0096063	0.289299	PSMD3	O43242
28.3686	28.4565	28.2622	28.2967	28.7895	28.8283	28.7283	0.000578777	0.00953125	0.436015	UGGT1	Q9NYU2
29.3548	29.1931	28.926	28.959	27.7877	27.9797	28.1415	0.000580886	0.00945736	-1.13859	IFI44L	Q53G44;H7C1K6
23.1034	24.1107	23.4809	23.8724	20.8891	19.8011	20.9074	0.00058338	0.00938462	-3.10929	BCLAF1	E9PK91
29.852	29.8716	29.6582	29.8361	30.2703	30.2729	30.376	0.000590272	0.00949618	0.501894	COPA	P53621
23.2617	22.8347	22.8198	22.8852	24.3636	24.4425	23.9855	0.000597505	0.00942424	1.31349	MRPL27	D6RAN8;Q9P0M9;H7C5U8
23.8001	24.1504	23.5272	24.8184	26.5992	26.6017	26.5609	0.000622788	0.00959398	2.51326	CKAP4	Q07065
22.6362	22.8689	22.3426	22.8242	23.7825	23.8178	23.6968	0.000631028	0.00952239	1.0977	CARD11	Q9BXL7
26.5805	26.6999	26.6726	26.8923	27.3005	27.3948	27.4914	0.000631442	0.00945185	0.684263	ACSL4	O60488
25.9723	25.7542	25.9418	25.9191	24.336	24.6348	24.9742	0.000633623	0.00958824	-1.24855	PWP2	A0A0B4J2E5;Q15269
25.0644	25.2956	25.2575	25.1168	24.4532	24.1734	24.4955	0.000636646	0.00951825	-0.80954	FOXK1	P85037
29.4107	29.2981	28.9335	29.1779	30.3415	30.126	30.4606	0.000642675	0.00944928	1.10427	HYOU1	A0A087X054;Q9Y4L1;E9PJ21;A0A087WWI4;K7EQK2
21.2905	21.3499	21.6264	21.2184	20.5937	20.5379	20.431	0.000650729	0.00938129	-0.850409	CHD5	Q8TDI0
23.0604	23.3998	23.1202	23.0717	22.4105	22.3891	22.197	0.000654744	0.00931429	-0.830798	SH2D3C	Q8N5H7
28.0446	28.2195	27.9763	28.0454	27.5435	27.5489	27.633	0.000660605	0.00958865	-0.496285	TCERG1	O14776;G3V220
28.4946	28.3059	28.4769	28.3738	27.7731	27.4246	27.7075	0.000669115	0.0100563	-0.777706	SNX2	O60749
21.6092	21.4624	20.9908	21.886	23.1146	23.1295	23.2139	0.00068092	0.00998601	1.66559	TP53I3	Q53FA7
26.5693	26.7187	26.7895	26.5343	25.8221	25.3513	25.6981	0.000683488	0.00991667	-1.02909	ALOX5	P09917
27.5694	27.4489	27.6151	27.4058	26.8813	27.0322	27.0246	0.000693504	0.00984828	-0.53037	SERPINH1	P50454;E9PPV6;E9PKH2;E9PR70
28.7274	28.7352	28.6932	28.6667	28.2435	28.0557	28.3154	0.000697259	0.00991781	-0.500784	THRAP3	Q9Y2W1
27.2213	27.3111	27.412	27.1532	27.8366	27.7435	27.8062	0.000701574	0.0102585	0.521087	SART3	Q15020;F8VV04
23.6518	23.9441	23.8375	23.2938	24.9739	25.1917	24.9261	0.000708321	0.0104595	1.34878	IGF2BP3	O00425
25.8679	27.2132	26.7503	26.8287	24.0889	23.0181	23.5308	0.000731827	0.0107114	-3.1191	ZNF318	Q5VUA4
26.2747	26.5746	26.2026	26.5266	23.7986	24.7827	24.5804	0.000736798	0.0109067	-2.00742	MPHOSPH10	O00566
26.1546	26.2843	26.0256	26.0289	25.587	25.6048	25.5625	0.000740375	0.0108344	-0.53862	GNPDA1	P46926;D6RAY7;D6R9P4;D6RFF8;D6RB13
29.8725	29.8725	29.6931	29.6861	29.3133	29.1385	29.2442	0.000773728	0.0110263	-0.549033	IMPDH2	H0Y4R1;P12268
24.2543	24.8338	24.4656	24.7813	23.3309	23.3639	23.0238	0.000777886	0.0109542	-1.34423	CHD1L	Q86WJ1;A0A0A0MSH9;A0A087WTM4;A0A0A0MRH8
25.6058	25.7427	25.9704	25.8761	24.8146	24.3438	24.7898	0.000786327	0.0111948	-1.14936	TUBB4A	P04350
23.0363	22.6636	22.898	22.0891	24.7041	24.3782	24.5616	0.00078903	0.0111226	1.87618	GALK2	Q01415;B7ZAX5
23.6851	24.3679	25.1671	23.9094	20.7938	21.0495	21.5897	0.000791346	0.0110513	-3.13805	EPB41L5	Q9HCM4
26.0923	25.994	25.8086	26.1329	24.9653	25.0456	25.3203	0.00079213	0.0109809	-0.896558	GTF2F1	P35269;M0R0R9;M0QXD6;M0R0Z3
20.2998	21.7024	22.123	20.4108	26.6871	25.0805	26.4321	0.00079961	0.0112152	4.93257	HLA-A	P30456
22.6881	22.2753	22.9017	22.5805	21.5104	21.1449	21.0763	0.000827701	0.0112704	-1.36754	URI1	I3L280;O94763
26.8464	26.7279	27.0136	26.68	27.8003	27.4891	27.7893	0.000830063	0.0112	0.875919	CD70	P32970
29.1868	29.3372	29.2781	29.2108	29.7317	29.6506	29.8862	0.000836744	0.0111304	0.502924	PLCG2	P16885;A0A0A0MRF9
29.0019	29.1744	29.266	29.2561	29.7294	29.8116	29.9654	0.000838923	0.0110617	0.660865	OAS3	Q9Y6K5
28.2921	28.0685	28.0388	27.8746	28.7995	29.0805	28.9306	0.000855446	0.0111166	0.868368	TAPBP	A0A0G2JKZ1;A2AB90;A0A0G2JH37;A0A0A0MSV9;O15533;Q6P1N7;A0A0A0MT98
23.5296	23.147	24.2326	24.5603	20.2484	21.1974	20.6757	0.000859138	0.0110488	-3.16019	CYLD	Q9NQC7;H3BS09;J3KRR7
26.5728	26.4968	26.3354	26.3002	25.7753	25.4248	25.6406	0.000873731	0.0109818	-0.812727	CARS2	Q9HA77
28.9519	28.6967	28.5994	28.6613	28.0241	28.1086	27.96	0.000876879	0.0109157	-0.696397	AKR1B1	P15121;E9PCX2
30.9671	30.6653	30.8203	30.9335	30.0943	30.0284	30.2731	0.000878783	0.0108503	-0.714595	HLA-A	A0A140T8W8;A0A1W2PR61;A0A1W2PPF8;A0A140T8Y4;A0A0G2JPD3;P30450
27.535	27.5948	27.4812	27.4318	28.2488	28.4929	28.0809	0.000888262	0.0112619	0.763476	NSF	I3L0N3;P46459
23.4911	23.6905	23.8565	23.3037	24.6546	24.6983	24.5309	0.000892462	0.0111953	1.04247	CHDH	Q8NE62
23.3358	23.2921	23.1759	23.3268	23.6156	23.7401	23.7901	0.000894923	0.0115294	0.432604	ATAD3B	Q5T9A4
22.5709	22.4007	22.5634	22.8312	23.664	24.3643	23.9613	0.000897562	0.011462	1.40501	CLN5	A0A1B0GTI0;A0A087WZY0;A0A1B0GWJ7;A0A1C7CYZ2;A0A1B0GTR6;A0A1B0GTV7;A0A1B0GUE8;A0A1B0GV94;A0A1B0GWI2;A0A0A0MRU5;A0A024R644;O75503
19.8929	20.9869	21.7064	20.8633	23.8183	24.1643	24.5029	0.000914222	0.0117442	3.29944	SLC25A24	Q6NUK1
27.0757	27.3178	27.0374	27.1567	26.5654	26.2328	26.3226	0.000936671	0.0117919	-0.773273	PPP5C	H0YDU8;P53041;A8MU39
29.7101	29.8116	29.5723	29.7107	29.1689	28.9762	29.2108	0.000949694	0.0117241	-0.582534	TRIM28	Q13263
21.4455	21.4881	21.3161	21.135	22.7368	22.2618	22.901	0.000962019	0.0116571	1.28705	FLOT2	J3QLD9;E7EMK3;Q14254;K7EKW9
26.6548	27.1562	26.857	27.0031	27.7502	27.883	27.9761	0.000973161	0.0115909	0.952011	SPCS2	E9PL01;A0A087WUC6;Q15005;E9PI68;E9PRB9
24.1974	24.4912	24.4023	24.2627	23.1725	23.6223	23.1793	0.000991065	0.0115254	-1.01372	WDR59	Q6PJI9;B7Z7V6
31.6063	31.6348	31.568	31.2179	32.3027	32.544	32.3542	0.00101151	0.0114607	0.893531	P4HB	P07237;H7BZ94;H0Y3Z3
27.3598	27.3358	27.1424	27.0086	28.2007	28.3353	27.9403	0.00101516	0.0113966	0.947157	HIST2H2AB	Q8IUE6
24.9904	24.8304	24.7908	24.6906	25.6337	25.3865	25.4421	0.00101936	0.0113333	0.661877	ACAA1	C9JDE9;P09110;H7C131;H0Y4D4
22.947	23.0777	22.9917	23.5421	24.2771	24.7762	24.8083	0.00102238	0.0112707	1.4809	RER1	O15258;Q5T092;A0A0A0MR06;Q5T091
29.2523	28.9601	29.4236	28.8953	30.9471	30.4352	31.3121	0.00102865	0.0112088	1.76526	LGALS1	P09382
27.2659	27.406	26.9571	26.741	28.286	28.2894	28.3614	0.00103054	0.0111475	1.21974	TMED10	P49755;G3V2K7
26.5955	26.5996	26.8709	26.5816	25.871	25.3098	25.5525	0.0010361	0.0112826	-1.08413	CECR5	Q9BXW7
27.7746	28.0007	28.219	28.1268	26.2589	26.7074	26.9532	0.00105145	0.0114811	-1.39046	COX7A2	D6RIE3;D6RGV5;H0UI06;P14406;D6R9C3
26.91	26.8688	26.6959	26.8463	26.402	26.4617	26.3259	0.00108488	0.0117204	-0.433691	MSH6	P52701;A0A087WWJ1
25.728	25.7983	25.495	25.6285	26.1675	26.2736	26.3433	0.00108706	0.0118075	0.599067	SEC24A	O95486
26.5819	26.6676	26.851	26.866	26.0457	25.6453	25.9255	0.00109416	0.0117447	-0.869453	METAP1	P53582;H0Y955
24.7463	24.5983	24.3649	24.3507	25.2278	25.3834	25.3441	0.00111661	0.0121905	0.803415	L2HGDH	Q9H9P8;C9JVN9
27.3131	27.7161	27.3171	27.4217	28.2819	28.2045	28.4872	0.00115135	0.0123789	0.882515	LMAN1	P49257
22.0326	22.036	22.292	22.0739	22.7057	22.782	22.5853	0.00115293	0.0125026	0.582368	MRPS12	O15235
26.4788	26.2254	26.4452	25.9191	27.7032	27.7432	27.2792	0.00115873	0.0124375	1.3081	ADK	P55263
23.3464	23.4139	23.6471	23.3556	22.3407	21.459	21.9642	0.00118034	0.0129534	-1.5194	RIT1	Q92963;V9GY29;V9GYC3
29.7804	29.9358	29.9149	29.6977	29.2513	29.0176	29.2894	0.00118458	0.0131546	-0.64609	SEPT7	E7ES33;E7EPK1;Q16181;G3V1Q4
29.5796	29.5268	29.4196	29.5403	29.164	28.9086	28.987	0.00118479	0.0130872	-0.49671	COX4I1	P13073;H3BN72;H3BNV9;H3BPG0;Q86WV2
27.5135	27.6015	27.7075	27.5048	28.1627	28.0039	28.2682	0.0011908	0.0130204	0.563098	BTF3	P20290
24.8878	24.9836	24.8437	24.8668	23.8666	24.3335	24.1308	0.00119197	0.0129543	-0.785207	NCBP2	P52298;C9JQX9;B3KSB0
23.6799	23.8081	23.707	23.8961	24.199	24.2534	24.4019	0.00119461	0.0128889	0.511976	MAPKAPK2	P49137
23.3063	22.884	23.1073	22.5604	25.0072	24.3092	24.6073	0.00119624	0.0128241	1.6767	SPPL2A	Q8TCT8;H0YNA7;H0YNA2
29.0125	29.0661	28.9752	28.9612	28.5674	28.5427	28.2797	0.00119765	0.01276	-0.540477	VASP	P50552
22.4921	23.4275	23.0536	23.457	21.3309	20.9307	20.52	0.00119887	0.0126965	-2.18037	IKZF1	Q13422
21.7109	21.4183	21.3952	21.8478	22.4217	22.7416	22.6975	0.00121299	0.0126337	1.02721	KIAA1147;LCHN	C9J7X6;A4D1U4
24.5123	24.5218	24.2962	24.2978	23.928	23.7818	23.8694	0.00121811	0.0125714	-0.54729	AARS2	Q5JTZ9
25.4818	25.5684	25.2233	25.022	23.7619	23.2598	24.074	0.00121927	0.0125098	-1.62529	PSMB5	P28074
30.5333	30.5309	30.4579	30.3566	30.0073	30.1442	30.0892	0.00123508	0.0126829	-0.389454	TCP1	P17987;E7EQR6;E7ERF2;F5H282
24.0761	24.0993	23.6663	24.0469	24.7955	24.7269	24.8568	0.00124009	0.0126214	0.820923	TACO1	Q9BSH4
26.3959	26.4913	26.0755	26.1835	27.0161	27.1276	27.0104	0.00126502	0.0125604	0.764808	CCDC47	Q96A33;A0A087WYW6
22.6217	22.4667	22.7146	22.7817	21.5111	21.6473	21.9854	0.00127078	0.0126538	-0.931576	ERI1	Q8IV48;E5RIV7
31.9643	32.1172	32.0694	31.8648	32.4162	32.5352	32.4757	0.00128441	0.012689	0.471773	PDIA3	P30101
21.6067	21.3465	21.6831	21.9535	23.2845	23.4931	22.757	0.0012845	0.0126286	1.53076	GLG1	H3BM42;Q92896
29.9157	29.911	30.0767	29.8692	29.4311	29.5675	29.3482	0.00129035	0.0125687	-0.49423	FKBP4	Q02790
32.5581	32.7197	32.6658	32.6862	32.2893	32.3278	32.1445	0.00131236	0.0126981	-0.403585	EZR	E7EQR4;P15311
27.787	27.8717	27.9234	27.9952	27.4546	27.4792	27.5763	0.00131805	0.0128638	-0.390951	PITPNB	P48739;A0A0A0MSW4;B3KYB7
24.7268	24.4715	24.4181	24.4275	23.4325	23.7899	23.7783	0.00131993	0.0128037	-0.844091	DIS3L2	Q8IYB7;H7C440
27.9386	27.6611	27.5475	27.5767	25.4552	26.4776	25.924	0.00135041	0.0130791	-1.72872	RPS29	P62273
21.7297	22.4578	22.3118	22.0204	23.4079	23.2905	23.5134	0.00136206	0.0135185	1.27403	PTPN2	P17706;K7EQG9;K7EIE9
22.5136	22.3044	22.1365	22.2781	21.729	21.5469	21.4558	0.00136604	0.0134562	-0.730954	PRKACB	A0A0A0MS54;P22694;A0A087WVC4
31.3391	31.1904	31.2674	31.0648	30.6889	30.584	30.7738	0.00137464	0.0138349	-0.533185	SPTBN1	Q01082;A0A087WUZ3
22.5701	23.2027	23.1204	22.824	24.0047	24.2737	24.0479	0.00140237	0.0139726	1.17947	VCAM1	E9PDD2;P19320
24.514	24.4214	24.8247	24.4798	23.6789	23.4461	23.8388	0.0014595	0.0140545	-0.9054	NECAP2	Q9NVZ3;D6RB24
25.0531	24.9018	24.2265	24.3114	22.8724	23.0117	23.1584	0.00147557	0.0141538	-1.60901	WAPAL	Q7Z5K2;Q8WVX6
22.5466	22.6747	22.4878	22.4205	23.7534	23.2199	23.3851	0.0015048	0.0143784	0.920379	SPR	P35270
25.3478	25.7098	25.4499	25.6542	24.789	24.8986	24.6047	0.00150618	0.0143139	-0.776308	SIN3A	Q96ST3
25.8818	26.0611	26.3187	25.7886	25.1094	24.8274	25.1154	0.00154053	0.0149643	-0.995162	KDM3B	Q7LBC6
28.289	28.4186	28.4555	28.2011	27.757	27.4533	27.7601	0.00156268	0.0150578	-0.684243	SASH3	O75995
29.7974	29.8015	30.048	29.9618	30.627	30.3784	30.4749	0.00156556	0.0149912	0.591233	NAMPT	P43490;A0A0C4DFS8
25.1168	25.3503	25.2222	25.2637	24.7368	24.7015	24.8868	0.00157374	0.0149251	-0.463256	TPMT	P51580
26.6874	26.6381	26.1605	26.385	27.454	27.7508	27.3922	0.00158274	0.0148596	1.06458	SSR1	C9J3L8;C9J5W0;E9PAL7;C9IZQ1;P43307
31.4783	31.3402	31.094	31.4534	31.9513	32.0998	32.0119	0.00161756	0.0151965	0.679542	MX1	P20591;F8W8T1
25.1234	24.8431	24.9193	24.8304	23.6564	24.0923	24.1653	0.00162747	0.0151304	-0.957687	QDPR	P09417;B7Z415;D6RGG7;D6RHJ7
25.3035	25.1579	25.1705	25.4406	24.177	24.6599	24.3267	0.00163735	0.01529	-0.880281	LRMP	F8W9L6;A0A1B0GU45;Q12912;F5H006
24.3282	24.5853	23.7944	24.3029	25.4567	25.6379	25.4233	0.00164795	0.0155517	1.25327	SLC2A3;SLC2A14	P11169;Q8TDB8
28.0888	28.4651	28.0771	28.4309	29.4237	29.0219	29.2946	0.00164928	0.015485	0.981266	HSPA1B;HSPA1A	A0A0G2JIW1;P0DMV9;P0DMV8;V9GZ37
26.6428	26.6802	26.5075	26.2399	24.9618	24.9516	25.6152	0.00165886	0.0155214	-1.34137	SNX9	Q9Y5X1
26.268	26.4097	26.3473	26.064	25.6824	25.6354	25.4072	0.00168726	0.0156085	-0.697283	GSN	A0A0A0MS51;A0A0A0MT01;P06396
32.2254	31.8676	32.0086	31.7866	31.078	30.5976	31.0562	0.00169119	0.0155424	-1.06146	GSTP1	P09211;A8MX94
25.5525	26.2258	25.9473	26.2311	23.6883	22.7147	24.1631	0.00170115	0.0157975	-2.46717	ASAH1	A0A1B0GTP7;E7EMM4;A0A1B0GW68;A0A1B0GUA4;A0A1B0GTM3;A0A1B0GTZ5;Q13510;A0A1B0GUE3;A0A1B0GUW4;A0A1B0GUH5;A0A1B0GUG1;A0A1B0GV06
28.4432	28.314	28.1746	28.1526	27.407	27.6822	27.2288	0.00170944	0.0157311	-0.831806	ACTN1	P12814;H9KV75
28.4651	28.2678	28.2041	28.8577	27.2157	27.4047	27.3985	0.00171126	0.0156653	-1.10905	GNAS	P63092;Q5JWF2
24.1095	24.108	24.043	23.885	24.5409	24.9531	24.7681	0.00171476	0.0156	0.717646	PARP4	Q9UKK3
26.4835	26.4559	26.4847	26.313	27.1314	26.9425	26.8319	0.00172866	0.0155353	0.534341	FKBP5	Q13451
29.0925	29.5376	29.5045	29.4373	30.0811	30.1908	30.1703	0.00175175	0.0154711	0.75444	DYNC1H1	Q14204
21.5835	21.8578	21.8138	22.2272	23.9436	25.0294	23.6455	0.0017683	0.0154074	2.33559	DHRS7B	A0A0C4DGQ8;Q6IAN0;J3KRS1
24.5135	24.9566	24.6903	24.616	23.873	24.0023	24.0366	0.00177698	0.0153443	-0.723479	CDC40	O60508;Q5SRN1
26.8966	26.9577	26.9956	26.8872	27.2045	27.3326	27.1777	0.00178236	0.0152816	0.304023	TOMM70A	O94826
24.974	24.7501	24.3844	24.9014	25.9213	25.6484	26.0834	0.0018237	0.0158699	1.13187	PARP14	Q460N5;H7C5R8
24.1347	23.8379	23.5927	24.0377	22.7685	22.2112	22.8217	0.00183005	0.0158057	-1.30028	SLC44A2	Q8IWA5;K7EPV6;K7ESF5
28.3452	28.2561	28.1689	28.04	28.7384	29.1036	28.8823	0.00184375	0.0159355	0.705559	DDOST	A0A0C4DGS1;P39656;U3KQ84
25.5972	25.9781	26.2257	25.9422	26.806	26.8869	26.9014	0.00185197	0.0158715	0.928989	GYS1	P13807
31.3724	31.3056	31.1055	31.5434	30.3466	30.203	30.657	0.00185229	0.015808	-0.929539	HLA-B	P30481;A0A140T997;A0A140TA11;A0A140T9Y5;A0A140T9A9;A0A140TA14;A0A140T9H3
31.2544	31.1926	31.3246	31.0884	30.8536	30.6244	30.6898	0.0018655	0.0159522	-0.492403	SPTAN1	Q13813;A0A0D9SGF6;A0A0D9SF54
25.5839	25.3795	24.9943	25.4876	26.5318	26.9964	26.4055	0.00186804	0.0160794	1.28324	TMED5	Q9Y3A6;M0R072;B1AKT3
25.6461	26.2667	26.2394	26.1989	25.036	24.3934	24.4925	0.00187257	0.0160158	-1.44716	CTPS2	Q9NRF8
25.1208	25.4974	25.2334	24.9186	23.4134	23.4869	24.1868	0.0018912	0.0160472	-1.49687	EPB41	P11171;A0A1B0GWG0;Q4VB86
27.6878	27.5219	27.5442	27.4706	28.2102	27.9276	28.1121	0.0019074	0.0161882	0.527136	NAGK	Q9UJ70;H7C3G9;C9JEV6;H7C286
26.3512	26.4155	26.17	26.1724	25.5851	25.8251	25.5316	0.00191046	0.0162656	-0.629987	UBE2O	Q9C0C9;K7ES11
27.0134	26.7214	27.1104	26.494	25.7372	25.2877	25.75	0.00193123	0.0162023	-1.24317	EVL	Q9UI08
27.2243	27.5038	27.3858	27.4134	27.7863	27.8616	27.7836	0.00193204	0.0161395	0.428666	NCKAP1L	P55160;F8W050
25.7015	25.8991	25.8874	25.7718	25.2468	25.4724	25.3081	0.00193371	0.0160772	-0.472484	TBC1D5	Q92609;C9J3F6
23.6089	23.6379	23.3707	23.4198	22.8912	23.028	23.0359	0.00193968	0.0160154	-0.524259	MRPL53	Q96EL3
23.4914	24.1888	24.0334	24.1589	25.0817	25.6275	25.3359	0.00195846	0.015954	1.38026	SLC25A20	O43772;C9JPE1
29.3957	29.4292	29.3809	29.2153	28.7052	28.5591	28.9265	0.00197091	0.0160458	-0.625015	OTUB1	F5GYN4;J3KR44;Q96FW1;F5H6Q1;F5GYJ8;F5H3F0
26.8495	26.8032	27.1968	27.4159	26.1009	26.0274	25.9161	0.00199865	0.0163194	-1.05153	ENOPH1	Q9UHY7;A0A0C4DGY8;D6RA00
27.4654	27.3224	27.3373	27.5628	27.8461	27.8223	27.8	0.00202504	0.0163333	0.400784	DNAJA2	O60884
25.2559	25.6605	25.677	25.6247	26.2501	26.2902	26.4968	0.00202642	0.0162717	0.791173	EML4	B5MBZ0;Q9HC35
25.4619	25.0672	24.8742	25.2444	26.1789	26.7486	26.2609	0.0020278	0.0162105	1.23417	SEC22B	O75396
24.7677	24.5103	24.41	24.6328	25.0981	25.2838	25.3871	0.0020748	0.0162547	0.676068	MPC2	Q5R3B4;O95563
22.0224	22.3333	21.9331	22.3359	23.0456	22.8176	23.0519	0.0020782	0.016194	0.815509	TMEM126A	Q9H061
24.5029	24.5301	24.7005	24.5028	24.1416	23.8239	24.0285	0.00207949	0.0161338	-0.561086	CD58	B1AMW1;P19256
25.1239	25.5845	25.6389	24.755	23.9187	23.2302	23.3306	0.00208087	0.0160741	-1.78241	HERC4	Q5GLZ8
24.8636	24.8955	25.2628	25.2407	23.8219	23.8237	23.0139	0.00208737	0.0160148	-1.5125	SENP3-EIF4A1;SENP3	A0A087X0R7;Q9H4L4;J3QL36
27.1487	27.218	27.4529	27.1072	26.109	26.518	25.8702	0.00209235	0.0159559	-1.06597	FLNB	O75369;E7EN95
22.413	22.0895	21.9601	21.8473	24.0325	23.2708	24.3952	0.00210358	0.016	1.82204	APOBEC3B	B0QYD3;Q9UH17
31.6488	31.8202	31.757	31.7499	31.149	31.4147	31.1225	0.00212176	0.0159416	-0.51526	RAN	B5MDF5;P62826;J3KQE5;F5H018;B4DV51
29.3778	29.2925	29.4684	29.3115	29.6213	29.6877	29.6453	0.0021342	0.0158836	0.288905	RPS27L	Q71UM5;C9JLI6;H0YMV8
29.7133	29.8538	29.9431	29.5344	29.1413	29.1625	29.0023	0.00213939	0.0158261	-0.659109	SEPT9	Q9UHD8
24.165	24.2068	23.8239	24.0531	24.917	25.5884	25.0953	0.00215127	0.0158989	1.13805	DHRS4;DHRS4L1	Q9BTZ2;P0CG22
26.0628	25.4352	24.917	25.2462	23.8464	23.5049	23.1605	0.00215233	0.0158417	-1.91135	TMEM70	Q9BUB7
28.8564	29.2015	29.1562	28.6695	30.3815	30.0687	29.8632	0.00215246	0.0157849	1.13356	LSP1	P33241;E7EMG9;E9PBD8
26.2284	25.792	25.6984	25.3205	24.5437	24.1184	24.3813	0.00216209	0.0157286	-1.41198	APOA1BP	Q8NCW5;Q5T3I4
22.0017	21.7579	21.4722	21.7416	20.6384	19.6257	19.6625	0.00217122	0.0156726	-1.76783	TWF1	Q12792;F8VS81;F8W1Q9
26.2818	25.9849	26.2321	26.2166	25.2074	25.4453	24.7866	0.00220704	0.0156879	-1.03244	DDX27	B7Z6D5;Q96GQ7
25.8362	26.3749	26.2228	25.808	25.178	24.9293	24.8365	0.00222636	0.0157173	-1.07923	APPL1	Q9UKG1
33.1041	33.0436	33.057	33.2003	32.8714	32.8573	32.8279	0.00223288	0.015662	-0.249066	HSP90AA1	P07900
25.4145	25.8777	25.5654	25.699	26.3791	26.6983	26.3639	0.0023466	0.0170105	0.841285	LAMP1	P11279
28.5791	28.5939	28.3232	28.4743	28.937	29.202	29.0192	0.002371	0.016951	0.56014	SEC31A	D6REX3;O94979;H7BXG7;D6RHZ5
24.0423	24.3412	23.9302	24.3381	25.0607	25.45	24.963	0.00237376	0.016892	0.994956	TYMS	P04818
27.0945	26.9784	26.6331	26.3025	25.6093	25.4392	25.5411	0.00238836	0.0168333	-1.22225	BCKDHA	F5H5P2;P12694;F5GXU9
21.7113	21.3621	21.5217	22.0254	22.8314	22.5825	22.62	0.002394	0.0167751	1.02281	DMAP1	Q5TG39;Q5TG40;Q9NPF5;Q5TG37;Q5TG36;Q5TG38
25.8802	25.6334	25.5693	25.9445	24.9516	25.1919	24.9171	0.00241012	0.0168	-0.736666	RNASEH2A	O75792
23.562	23.6457	23.6371	23.7405	23.1489	22.9628	23.2917	0.00241876	0.0167423	-0.511857	SIRT3	E9PK80;E9PM75;E9PN58;Q9NTG7;E9PNA0
23.7329	24.5929	24.3938	24.3968	26.1567	25.4931	25.825	0.00243132	0.0166849	1.54585	SEMA4A	Q5TCJ5;Q9H3S1;Q5TCI6
20.981	21.7002	21.0999	21.872	23.8303	22.8903	23.9184	0.00243648	0.016942	2.13305	HLA-DMA	F6S093;A0A140T9N4;A0A140T9N2;A0A140T9E7;A0A140T9D1;A0A140T9C7;A0A140T995;A0A140T985;Q5SP00;A0A140T9G2;A0A140T9T2;A0A140T9H8;H0Y732;A0A140T9X4;A0A140T9V7;A0A140T9T3;A0A140T9N9;A0A140T9N7;A0A140T9K8;P28067
26.5347	26.6473	26.5108	26.4988	25.7226	24.9941	25.6261	0.00244379	0.017102	-1.10031	BLNK;BASH	Q8WV28;Q2MD59
28.3701	27.9298	28.1223	28.1369	28.7909	29.1987	28.9126	0.00244588	0.0170441	0.827593	ATP5L	O75964;E9PN17
22.8888	23.5798	23.0942	23.1192	24.3719	24.0825	24.1936	0.00249372	0.0171486	1.04551	ARHGAP10	A1A4S6
31.0924	30.9161	30.645	30.6004	31.5213	31.8062	31.8648	0.00250116	0.0170909	0.917269	PPIB	P23284
25.6533	25.7473	26.1403	25.4475	26.8782	27.4336	26.853	0.00251996	0.0173826	1.30785	TMED9	Q9BVK6
21.0294	21.5576	21.9429	21.4344	24.225	23.5899	22.9619	0.00258159	0.0181538	2.10122	BASP1	P80723
24.7647	25.156	25.1907	25.2213	26.4347	26.4904	25.8562	0.00258483	0.0182933	1.17724	RRBP1	F8W7S5;A0A087WVV2;A0A0A0MRV0;Q9P2E9
25.9475	25.8535	25.6946	25.8804	26.3311	26.168	26.3033	0.00258702	0.0182326	0.42348	DAK;TKFC	Q3LXA3;H0YCY6
23.5889	23.8939	23.4934	23.6445	24.2379	24.4536	24.6547	0.00258849	0.0181722	0.793568	ERLEC1	Q96DZ1
25.6404	25.537	25.5201	25.6382	23.2821	22.2127	23.9975	0.00259696	0.0183762	-2.41985	MGMT	P16455
29.0325	29.11	29.243	28.8857	28.4979	28.1444	28.4407	0.00260338	0.0183158	-0.706805	ST13;ST13P4;ST13P5	P50502;Q3KNR6;H7C3I1;Q8IZP2;Q8NFI4;F6VDH7
30.8855	30.8966	30.5276	30.7087	31.894	31.7211	31.3738	0.00265142	0.0186754	0.908374	HIST1H2BN;HIST1H2BM;HIST1H2BH;HIST2H2BF;HIST1H2BC;HIST1H2BD;HIST1H2BK;H2BFS	U3KQK0;Q99879;Q99877;Q93079;Q5QNW6;P62807;P58876;O60814;P57053
31.728	31.6612	31.6602	31.7119	31.5046	31.4689	31.3441	0.00270756	0.0188497	-0.25116	ACTN4	O43707
23.451	23.5293	23.5764	23.0599	24.1294	24.2089	24.1962	0.00271134	0.0187883	0.774045	TAP2	A0A0G2JLV0;A0A087WYD6;X5CMH5;Q03519
22.2683	21.3975	21.6686	21.7298	23.1028	23.191	22.8438	0.00271404	0.0187273	1.27984	YIF1B	K7ERQ0;K7ERY2;Q5BJH7;K7EJQ6
27.266	27.4561	27.4556	27.1982	26.9388	26.75	26.8498	0.00271561	0.0186667	-0.497767	AGL	P35573
26.0776	26.1105	26.3764	25.7774	24.5871	22.9131	23.6808	0.00274687	0.0195097	-2.3585	KDM1A	O60341
25.8766	25.6769	25.9413	25.7891	25.475	25.4027	25.3288	0.00275451	0.0195627	-0.418777	RASSF2	P50749
20.7735	21.9096	21.8048	20.724	23.2761	24.1237	23.6032	0.00277684	0.0195	2.36468	BAZ1A	Q9NRL2
24.9407	24.5591	24.7031	24.4826	25.3102	25.3516	25.3165	0.00278166	0.019476	0.654735	CTSB	P07858
30.0454	30.3028	30.0732	29.9066	28.2164	27.6812	28.9722	0.00279768	0.0195924	-1.79205	BANF1	O75531
24.6957	24.3055	24.2905	24.8649	23.0229	23.0054	23.6303	0.00279962	0.0195302	-1.31961	IKBKB	O14920;G3V105;E5RGW5
25.981	26.0556	26.0511	26.2483	26.4895	26.5812	26.4358	0.00280563	0.0195823	0.41817	TIGAR	Q9NQ88
22.0894	22.3519	22.1351	22.1855	22.5236	22.6707	22.663	0.00283239	0.0200379	0.428641	CPEB4;CPEB2;CPEB3	E5RFP2;E5RJM0;B7ZLQ8;Q17RY0;H0Y9D9;J3KN18;Q7Z5Q1;Q8NE35
25.0639	25.044	25.2479	25.1044	24.5794	23.9629	24.1819	0.00284097	0.020239	-0.873656	ENPP4	Q9Y6X5
25.4733	25.728	25.5205	25.7557	25.1554	24.8824	25.06	0.00285924	0.020326	-0.586766	ARHGAP15	Q53QZ3
27.1013	27.1405	27.5061	27.6957	28.6335	28.9009	28.2699	0.00290647	0.0204625	1.2405	TOP1	P11387
22.4198	22.1052	22.1237	22.0365	21.1423	21.1661	20.3908	0.00294305	0.0204361	-1.27159	PPP6R2	O75170
25.6093	25.9844	25.7991	25.8497	26.3495	26.7498	26.5027	0.0029505	0.0203727	0.723343	TMX1	Q9H3N1
24.2276	24.1951	23.4879	23.9783	22.699	22.9407	22.8696	0.00296281	0.0203096	-1.13579	DOCK7	Q96N67;A0A1B0GWE0
26.8706	26.7998	27.0654	27.1207	25.9424	26.4084	26.2017	0.00296867	0.0203951	-0.779943	HERC5	Q9UII4;E9PBL0
28.769	28.8862	28.6732	28.496	27.9549	28.0482	28.2203	0.00297531	0.0203323	-0.631633	CAT	P04040
28.2218	28.0604	28.1985	28.0703	28.5762	28.4122	28.6365	0.00297878	0.0203926	0.403915	HSD17B10	Q99714;Q5H928
22.2863	22.947	22.2419	22.8526	24.1821	24.1305	23.6406	0.00305437	0.0210765	1.40244	LAMTOR5	O43504
27.587	27.3086	27.3322	27.3232	27.8431	28.1568	27.9385	0.00306769	0.0210854	0.591738	CELF2	E9PC62;A0A0J9YXJ0;V9GYD9;Q5VZZ6;A0A0J9YX66;A0A1B0GU44;A0A1B0GUN8;O95319
30.3504	30.2953	30.2966	30.501	29.9682	29.7655	30.0001	0.00306917	0.0210213	-0.449575	PGD	P52209;K7EM49
26.3874	26.1196	26.6349	26.4993	25.7617	25.364	25.3442	0.00308272	0.0209576	-0.920335	DHTKD1	Q96HY7
27.8611	27.8928	27.5158	27.6276	27.1474	27.0465	27.177	0.00314298	0.0211843	-0.600703	SRRM2	Q9UQ35
30.5007	30.5638	30.9131	30.6992	29.8614	29.8375	30.1437	0.0031473	0.0211205	-0.721666	NCF1;NCF1B;NCF1C	P14598;A6NI72;A8MVU1
25.4928	25.1603	25.1726	25.1059	23.5687	23.6563	22.2712	0.00314741	0.0210571	-2.06749	CRLF3	Q8IUI8
27.4351	27.2303	27.4723	27.2075	26.5415	26.857	26.7929	0.00317296	0.0212335	-0.605849	GCDH	Q92947
26.4717	26.2914	26.0238	26.0609	25.3286	25.6176	25.4013	0.00317802	0.0212657	-0.762778	VPS4A	Q9UN37;I3L4J1
30.5438	30.6878	30.4297	30.603	30.9955	30.8991	30.9047	0.00319644	0.0213333	0.367011	RPL5	P46777
29.6675	29.5289	29.4927	29.5376	29.3026	29.0881	29.086	0.00321893	0.021365	-0.397823	PPP2R1A	P30153;B3KQV6;C9J9C1
26.975	27.1753	27.1697	26.7979	26.3972	25.8535	26.1589	0.00327306	0.0220118	-0.89294	LRRFIP1	Q32MZ4
24.8707	25.2394	25.0709	24.7269	25.7458	26.2513	25.853	0.00330163	0.0223717	0.973056	LIMA1	F8VQE1;Q9UHB6;F8VS07
25.9089	26.1661	26.173	25.5707	25.1662	24.8126	24.816	0.00330318	0.0224588	-1.02308	MMAB	Q96EY8;S4R3P5;F5H4Z7
24.6785	24.975	24.6589	25.1528	26.4098	25.674	26.1049	0.00332889	0.0226628	1.19662	SDF2L1	Q9HCN8
24.6706	24.6525	24.4971	24.5341	23.8522	24.2372	23.918	0.00333491	0.0225965	-0.58613	PIK3C3	A0A1W2PS05;Q8NEB9;A8MYT4
23.3104	23.4936	23.6684	23.5165	24.4131	24.5726	24.0267	0.00341231	0.0225306	0.840258	SLC35A4	L0R6Q1
24.2272	24.3187	23.741	24.065	25.3126	26.1846	25.2867	0.0034292	0.0226047	1.50664	SEC11L3;SEC11C	B4DI03;K7EJQ7;Q9BY50;A0A0A0MR04
26.2196	26.0421	26.1768	25.8352	27.0674	26.6451	27.2006	0.00345688	0.022713	0.902625	GMFG	O60234;M0QYJ8;M0R0C1;M0QYG8;M0R1D2
27.4429	27.7715	27.7377	27.9507	28.3081	28.6369	28.5723	0.00348995	0.0229711	0.78008	GSTM1	P09488;E7EWW9;B9ZVX7
27.3433	27.791	27.4322	27.7937	28.3728	28.3901	28.2541	0.00350266	0.0231124	0.74896	CYC1	P08574
26.0561	25.9843	25.8706	25.5582	26.6967	26.5513	26.5075	0.00351922	0.023046	0.71788	RAB21	Q9UL25
25.6934	25.1938	26.6392	26.7548	28.4983	28.2183	28.5475	0.00352498	0.0231289	2.35104	HLA-A	Q5SRN7;A0A1W2PS24;Q5SRN5;P04439
24.2122	24.4273	24.6573	24.1669	23.3715	23.6277	23.0223	0.00353963	0.0231886	-1.02545	AMPD3	Q01432;E9PKC5
24.8871	25.2342	25.0819	25.7676	23.8984	22.9156	23.6988	0.00354237	0.0231225	-1.73845	THOC7;NIF3L1BP1	Q6I9Y2;A0A024R341
21.2025	21.0699	20.6974	21.2551	22.1306	21.8181	21.854	0.00359174	0.0236705	0.87801	RBM47	D6R9D6;B7Z8Z7;A0AV96;D6REZ6;D6RBS9
23.574	24.1754	23.9687	23.7984	22.9573	23.0302	22.5123	0.003595	0.0236034	-1.04587	ERI3	H0Y4B0;O43414;F6QUN3
29.3488	29.2171	29.3798	29.372	29.6396	29.5788	29.7663	0.00361212	0.0235367	0.332167	SNRPN;SNRPB	J3QLE5;P63162;P14678;J3KRY3;S4R3P3
27.8373	28.0447	27.9171	27.3944	26.9006	26.9414	26.5795	0.00363002	0.0236169	-0.991192	SAE1	Q9UBE0;M0QZS6;B3KNJ4;M0QX65
27.7335	27.6891	27.736	27.9147	27.4233	27.491	27.4425	0.00363824	0.0236966	-0.316074	PCBD1	P61457
21.9026	22.3587	22.659	21.8503	23.3002	23.5305	23.3744	0.00364157	0.0236303	1.20907	MMAA	Q495G5;Q8IVH4
25.5249	25.6852	25.4224	25.6144	25.0424	25.0988	24.7255	0.00368358	0.0239106	-0.606155	GATAD2B	A0A0U1RRM1;Q8WXI9
26.3325	26.112	26.4639	26.4854	25.4309	25.615	25.8347	0.00369502	0.023844	-0.721553	MPI	P34949;H3BPB8;H3BMZ9;H3BPP3;H3BUZ9;H3BPM5;H3BQX0;H3BP57;H3BT48;F5GX71;H3BPU7;H3BU66;H3BNY8;H3BT46
25.6759	25.8005	25.8434	25.9149	25.3097	25.3991	25.033	0.00370586	0.0239111	-0.561407	SLAMF1	Q13291;Q96QJ2
26.5764	26.6535	26.7524	26.3038	26.0144	25.5675	25.642	0.0037228	0.0240111	-0.83021	LANCL1	O43813;E9PHS0
26.6048	27.2036	26.9543	26.9002	27.8488	27.5727	27.8767	0.0037499	0.0241989	0.850363	PITRM1	Q5JRX3;A0A0A0MRX9
20.8711	20.9643	20.9559	20.6385	22.388	22.3213	23.677	0.003767	0.0242204	1.938	SIL1	D6REA1;Q9H173
25.7191	25.6152	25.6286	26.1006	27.3704	26.5517	27.0526	0.00379341	0.0242967	1.22571	APOBEC3C	Q9NRW3
27.8016	27.7219	27.8877	27.7444	28.1965	28.1429	28.0077	0.0038024	0.0243068	0.32677	PSMC3	R4GNH3;P17980;E9PM69;E9PMD8;E9PKD5;E9PN50
21.8655	21.7301	22.2172	21.4622	23.1721	22.6859	22.9476	0.00384304	0.0246011	1.11644	NT5DC3	Q86UY8
25.7017	25.7399	25.8895	25.424	26.2589	26.2528	26.3629	0.00384672	0.0246649	0.602755	ECI1;DCI	P42126;Q96DC0;H3BS70
30.6872	30.6507	30.5841	30.6019	30.4236	30.5045	30.4367	0.00389311	0.0250652	-0.176037	PA2G4	Q9UQ80
29.1195	28.7979	28.9975	28.8292	28.4906	28.5064	28.4303	0.00392916	0.0249973	-0.460225	NUDC	Q9Y266
21.5983	22.4342	22.4321	22.8347	20.2016	18.8039	20.2904	0.00393274	0.0249297	-2.55954	METTL17	Q9H7H0;H0YJW1
26.049	26.2539	26.1541	26.2133	25.3896	25.8109	25.5684	0.00400247	0.0255202	-0.577946	ATXN10	Q9UBB4;A0A1W2PQD2
25.3198	25.4543	25.4241	25.7098	24.871	24.6007	24.9572	0.00403086	0.0254516	-0.667384	RBM12B	B9ZVT1;Q8IXT5
23.0719	23.5965	23.8514	23.8403	22.6355	22.0832	22.1325	0.00412277	0.0257587	-1.30628	UBQLN2	Q9UHD9
23.9623	24.0074	23.9971	23.7507	23.1918	22.4893	23.1178	0.00413858	0.0257754	-0.996388	NLE1	Q9NVX2;A0A0A0MRH0
29.1215	28.9335	29.1196	28.852	28.6164	28.6116	28.499	0.00415504	0.0259627	-0.430996	PDCD6IP	Q8WUM4
24.8115	24.6804	24.9077	25.0446	24.1665	23.3257	23.7657	0.00417681	0.0258936	-1.10842	MAP2K4	P45985
30.4862	30.3436	30.312	30.2247	29.931	29.7104	29.9784	0.00424092	0.0260477	-0.468353	PPA1	Q15181;Q5SQT6
25.9971	26.5595	26.3346	26.2343	27.4804	27.0964	27.0055	0.00424886	0.0259788	0.912708	SPCS3	P61009
27.498	27.3687	27.0285	27.0309	28.7358	28.0254	28.9185	0.00427305	0.0260792	1.3284	MZB1	Q8WU39
31.596	31.5505	31.4529	31.7357	31.1943	31.275	31.2002	0.00428822	0.0260737	-0.360603	TKT	P29401;A0A0B4J1R6
26.197	26.4422	26.4041	26.2102	25.5789	25.1345	25.7325	0.00429012	0.0260052	-0.831373	IFIT5	Q13325
28.0262	28.3969	28.1824	28.0505	28.6105	28.8164	28.7297	0.00429756	0.0261257	0.554859	PLEC	Q15149
26.5525	26.7345	26.5866	26.6246	25.7917	25.4716	26.1348	0.00430507	0.0260574	-0.825194	POLD1	M0R2B7;P28340;M0QZR8
23.9217	24.3088	24.1116	23.7101	23.2141	23.3317	23.1525	0.00432313	0.0259896	-0.780239	GATAD2A	Q86YP4
22.5169	23.6282	23.2392	23.4237	21.3358	21.7918	21.8194	0.00434443	0.0261195	-1.55297	MAZ	I3L2Z5;A0A087WWR2;P56270
25.8416	25.9396	25.6085	26.115	25.2096	24.8158	25.18	0.00435986	0.0261658	-0.807725	TRAFD1	O14545;F8VNX8
22.2093	21.5144	20.6188	21.7305	23.6258	23.2691	23.7917	0.00436506	0.0260982	2.04397	TEP1	G3V5X7;Q99973;G3V2A4;G3V470
25.7117	26.0113	25.8395	25.9713	26.2784	26.2953	26.4555	0.00436806	0.0260309	0.459651	ARF4	P18085;C9JPM4;C9JAK5
25.5379	25.6289	25.5183	25.3439	25.0732	24.9205	25.1647	0.0043776	0.0260051	-0.454475	RRAS2	P62070;E9PK85
28.0248	28.0597	27.9798	27.7784	27.4171	27.6287	27.507	0.00447427	0.0265333	-0.443078	MAPK1	P28482
27.1755	27.1619	27.2803	26.9776	26.2992	26.7154	26.1968	0.00448495	0.0264655	-0.745013	PTPN11	Q06124;A0A1W2PPU4
24.8824	25.4198	25.0911	25.6381	23.851	24.3964	23.8784	0.00448507	0.026398	-1.21592	NARS2	Q96I59
20.5931	20.7556	21.1757	21.2964	21.8932	21.9204	22.2065	0.00451043	0.0263817	1.05155	MOSPD2	R4GMN1;Q8NHP6
28.6556	28.6139	28.4808	28.6229	28.3802	28.2638	28.1935	0.0045805	0.0264975	-0.314109	GMPS	P49915
22.3051	22.67	23.2511	22.2574	20.7936	20.494	21.4122	0.00458867	0.0265013	-1.72094	ERO1LB	Q86YB8;Q5TAE8
25.9643	26.3677	26.2615	26.3841	25.5959	25.0627	25.4792	0.00459574	0.0266869	-0.865148	MVK	F5H8H2;Q03426;F5H092;A0A1B0GWC2
23.7599	23.6631	23.9634	23.3827	24.3091	24.5452	24.6625	0.00461289	0.0268816	0.813347	BLOC1S5	Q8TDH9
25.2905	25.3373	24.9156	25.1196	24.431	23.6722	24.199	0.00464611	0.0268945	-1.06499	BRAF	P15056;H7C560
23.0846	23.0595	22.9312	22.8545	22.0365	22.5711	22.151	0.00466629	0.0270175	-0.729612	XPO4	F2Z2X4;Q9C0E2
26.6623	26.7543	26.6371	26.8411	26.3378	26.3684	26.4883	0.0046779	0.02713	-0.32552	VWA8	A3KMH1
23.9781	23.8169	23.6791	23.9445	24.3117	24.8163	24.559	0.00469328	0.0270623	0.707711	DRG2	A8MZF9;P55039
28.0891	28.3445	28.063	28.2633	28.575	28.5682	28.6947	0.00475991	0.0273134	0.422684	H2AFY	O75367;B4DJC3
27.7023	27.8067	27.6995	27.7281	28.2449	27.9658	28.2881	0.00477634	0.0272457	0.432105	VARS	P26640;A0A140T936
24.1784	24.2923	23.6681	24.1917	24.8836	25.3245	24.9559	0.00480096	0.0271782	0.972051	DTX3L	Q8TDB6
26.4708	26.8601	26.5744	26.0692	25.0885	25.6018	25.4431	0.00480493	0.0272099	-1.11578	PAFAH1B3	Q15102;M0R1K3;M0R389
27.8245	27.7673	27.8526	27.5385	28.1157	28.1756	28.2107	0.00480871	0.0272611	0.421595	PDHB	P11177;C9J634
28.8418	28.9319	28.4475	28.6325	28.1167	28.0768	28.0872	0.00483742	0.0273022	-0.619829	DLD	P09622;E9PEX6
26.5266	26.1492	26.0665	26.2191	25.2075	25.6237	25.565	0.00483813	0.0272353	-0.774943	PPM1A	P35813;E9PKB5
23.4812	24.2196	23.6001	23.4832	22.4511	22.788	22.2004	0.00485354	0.0271687	-1.21622	EXOC3	O60645;D6RB59;H0Y995
21.8473	23.1413	23.0946	22.7383	20.6292	20.5246	19.0847	0.00489877	0.0274537	-2.62584	CYHR1	E9PJD7;Q6ZMK1;E9PQ42
24.2799	24.6804	24.0586	23.7522	23.0058	23.1926	22.8382	0.00492086	0.0275036	-1.18055	DPYD	Q12882
24.6384	25.1324	25.0765	24.8523	24.0893	24.3696	24.08	0.00492871	0.0274369	-0.745265	ARHGAP4	P98171;E9PCM6;E7EQN5
23.2895	23.1619	23.7518	23.4291	22.694	21.9867	22.265	0.00495076	0.0276029	-1.09282	CHM	P24386
26.0904	26.6827	26.6161	26.467	27.218	27.4776	27.1937	0.00497926	0.0275362	0.832384	SRPR	P08240
24.9534	24.9688	24.4424	25.2962	25.7781	26.183	26.1679	0.00499782	0.0274699	1.12779	RRAGA;RRAGB	Q7L523;Q5VZM0;Q5VZM2
27.2779	27.4296	27.2784	27.0566	26.6975	26.8366	26.8358	0.00503582	0.0274808	-0.470647	NAA10	P41227;C9JN83;F8W808;A8MWP7;C9JW55
26.6527	26.0701	25.9898	25.9274	24.9715	24.6657	25.2909	0.00504086	0.0274149	-1.18395	ADD1	P35611;E7EV99;E7ENY0;A0A0A0MSR2;H0Y9H2
25.4545	25.1982	25.124	25.1108	24.0319	24.6393	23.8549	0.00507826	0.0275885	-1.04656	SCARB1	B7ZKQ9;Q8WTV0;F5H4X0;F5H5E8
23.0346	23.0309	22.7761	23.2372	22.2983	22.2877	22.5592	0.00508239	0.0276277	-0.63799	METTL14	Q9HCE5;D6RBL4
27.3282	27.6104	27.3097	27.5696	27.902	27.8811	27.9148	0.0050896	0.0275619	0.444814	ESYT1	Q9BSJ8
25.9676	25.118	25.6998	25.5849	24.4011	24.7064	24.4885	0.00509309	0.0274964	-1.06058	S100A4	P26447
30.8737	30.7785	30.8448	30.78	30.4339	30.653	30.48	0.00510744	0.0274313	-0.296957	CCT6A	P40227
24.5931	24.5418	24.4108	25.0815	25.5576	25.5672	26.0955	0.00515025	0.0275461	1.08332	STT3A	P46977
28.78	28.5819	28.2751	28.5706	29.4875	30.0574	29.3081	0.00521707	0.0277547	1.06577	SLC25A3	Q00325
24.5608	24.7629	24.3688	24.7497	23.4046	22.0894	23.2233	0.00525687	0.0277929	-1.70482	CD300A	Q9UGN4;J3QKQ4
27.1525	27.3565	27.3359	27.1727	26.899	26.9809	26.8011	0.00530438	0.0281408	-0.360753	AK3	Q9UIJ7
22.4138	20.955	22.4091	22.0746	24.0675	23.759	23.9268	0.00530645	0.0280749	1.95462	APOOL	A0A087WUX8;A0A087WYF7;Q6UXV4
23.4947	23.881	23.8127	23.6906	22.8325	23.273	22.9537	0.00531008	0.0280093	-0.700057	PRPF39	Q86UA1
25.8565	25.6234	25.6425	25.6816	25.0539	25.3448	24.8809	0.00538035	0.028373	-0.60781	DNPH1	H0Y8X4;O43598
31.048	30.5719	30.8818	30.6991	31.8139	31.354	31.9296	0.00541731	0.0284744	0.898969	WARS	P23381
26.6129	26.5992	26.2609	26.5792	25.7419	26.0934	25.8367	0.00542601	0.0285012	-0.622359	PNPO	Q9NVS9;J3QQV6
24.5057	24.698	24.3232	24.8884	23.9348	23.9604	23.8609	0.00542692	0.0284352	-0.685122	SAAL1	J3KND1;E9PRZ1;Q96ER3;H0YCN7;H0YEK5;E9PMD2
22.9514	23.2697	22.7026	23.386	22.3015	22.0993	21.873	0.00543003	0.0284249	-0.986161	POLR1D	Q9Y2S0;Q7Z776;A0A087X0U2;A0A1B0GUZ5;A0A0R4J2F3
20.3963	20.8711	21.7727	20.78	22.8941	22.3597	22.8505	0.00544294	0.0285438	1.74646	JMJD6	B2WTI3;B2WTI4;K7EJU9;Q6NYC1
30.2871	30.4211	30.0908	30.2884	29.5795	29.9218	29.6427	0.005474	0.0286713	-0.557201	PHGDH	O43175;Q5SZU1
24.184	24.2168	24.0984	23.7874	22.882	22.7322	23.4784	0.00551388	0.0286789	-1.04079	PSMB6	P28072
24.561	24.3504	24.4797	24.5729	24.8616	24.9512	25.2387	0.00551497	0.0286133	0.526181	RB1	P06400
24.2961	24.277	24.5057	24.3645	22.8456	20.3285	21.285	0.00553116	0.0286667	-2.87443	LMNA	Q3BDU5
30.6588	30.3319	30.3264	30.2809	31.1492	30.8558	31.309	0.00556953	0.0287472	0.705167	SERPINB9	P50453
26.1504	26.1813	25.8881	26.3879	25.4677	25.3843	25.6603	0.0055722	0.0286818	-0.647821	NOC4L	Q9BVI4
30.2922	30.4766	30.3352	30.4305	30.7541	31	30.694	0.00558041	0.0286168	0.432421	RPS2	P15880;H0YEN5;E9PQD7;I3L404;E9PMM9;E9PM36
20.8078	20.4462	20.7768	21.5297	22.2374	22.0624	22.1572	0.00576174	0.0295023	1.26219	GRN	K7EQ05;P28799;K7EQI0;K7EKL3
27.553	27.8032	28.0956	28.1938	27.0525	27.1591	27.1138	0.00576871	0.0294357	-0.802928	PIP4K2A	P48426
29.9835	29.8806	29.7869	29.6334	29.1671	29.4333	29.0299	0.00577576	0.0293694	-0.611	SRSF1	J3KTL2;Q07955;J3KSR8
20.8915	21.2405	21.1362	21.2831	22.3848	21.6802	22.1323	0.00578615	0.0294112	0.927908	ARAF	Q96II5;P10398
27.8599	28.198	27.8645	27.8853	27.0115	27.4249	27.3868	0.00580989	0.0294439	-0.677542	G3BP2	Q9UN86
28.5238	28.8402	28.221	28.7271	29.9471	30.2099	29.3275	0.0058165	0.0293781	1.25016	RPS6	P62753;A2A3R5
25.8304	25.6056	25.5353	25.705	24.9943	24.7911	25.2793	0.00581687	0.0293125	-0.647536	ZNF326	Q5BKZ1
26.68	26.7812	26.9407	26.4218	26.1081	25.8483	26.116	0.00585641	0.0294076	-0.681802	IRF5	C9JAU6;Q13568
26.4636	26.2944	26.5339	26.6948	25.9615	26.0952	25.8437	0.00590318	0.0297156	-0.529903	EPS15L1	Q9UBC2;M0R165;M0R2S2
23.622	24.1495	24.6509	23.8769	22.876	22.822	22.9246	0.00590437	0.0296497	-1.20061	SHMT1	P34896
27.3097	27.256	27.1507	27.0651	26.9164	26.7456	26.8629	0.00591133	0.0296549	-0.353761	SMU1	Q2TAY7
24.5572	24.9456	24.3355	25.0671	25.6309	25.7975	25.5985	0.00595155	0.029713	0.949283	TM9SF3	Q9HD45;Q5TB53
27.7953	27.977	27.7711	27.6313	28.1935	28.2917	28.1471	0.0060014	0.0300352	0.417086	PTK2B	Q14289
25.0505	25.2364	25.0204	24.6526	24.3038	23.535	23.9076	0.00602702	0.0301714	-1.07447	EFTUD1	Q7Z2Z2
26.2328	26.1234	25.9125	26.0828	26.5777	27.1998	26.8218	0.00603901	0.0301053	0.778568	SMAP2	Q8WU79;X6RCC3;A0A087WV97
26.5285	26.4163	26.3097	26.2733	26.016	26.1138	26.0203	0.00616835	0.0308972	-0.331869	CLUH	O75153;K7EIG1;I3L2B0
26.661	26.4771	26.4134	26.3196	25.4472	25.9052	25.0702	0.00621639	0.0309607	-0.993547	ACADS	P16219;E9PE82
21.7529	21.3239	21.2394	21.2137	22.1862	22.7477	22.169	0.00625873	0.0311024	0.985141	SDAD1	E7EW05;Q9NVU7;F8W8T7;D6RC74
22.1782	22.6791	22.6378	22.453	23.3615	24.5095	23.8032	0.00627324	0.0310348	1.40437	MB21D1	Q8N884
24.8376	24.5626	25.3975	25.6371	22.3153	23.5418	23.4692	0.00630971	0.0311063	-1.99989	PPP1R9B	D3DTX6;Q96SB3
22.1605	22.0372	22.3498	22.6097	22.8661	23.0979	23.2179	0.00632697	0.0311861	0.771302	ODR4	Q5SWX8
26.7129	26.5269	26.6464	26.2374	25.377	25.9566	25.7173	0.00633233	0.0311188	-0.847235	AMPD2	H0Y360;Q01433
24.2005	25.9486	24.9414	24.5512	23.0997	22.1092	22.6605	0.00633859	0.0310517	-2.28735	NIPBL	Q6KC79
29.4923	29.5704	29.4895	29.417	29.1029	29.2304	29.306	0.00634157	0.0309849	-0.279185	ADAR	P55265
22.4728	22.629	21.7991	22.7018	23.5334	23.4085	23.7791	0.00636746	0.0309185	1.17298	DOHH	Q9BU89;K7ERU8;K7EIV2
31.0389	30.9856	31.1097	31.1647	30.5902	30.8437	30.7465	0.00640793	0.0313405	-0.347896	PTPN6	P29350
27.0199	27.2966	27.2417	26.8407	27.7086	27.9649	27.6401	0.00641029	0.0312735	0.671478	HDLBP	A0A024R4E5;Q00341;H0Y394
22.6635	23.5326	23.1767	22.4427	21.5125	21.7929	21.2947	0.00641294	0.0312068	-1.42048	RAPGEF2	Q9Y4G8
25.6944	25.8712	25.4707	25.7391	24.0358	22.9051	21.3907	0.00641942	0.0312	-2.91665	GSPT2	Q8IYD1
22.0072	22.3328	20.8814	20.5409	24.0923	23.6564	25.2116	0.00646185	0.0312442	2.87952	SPTBN2	O15020
24.6483	24.3773	24.5643	24.8325	25.3531	25.0784	25.1505	0.00650449	0.0312797	0.588395	TMED8	Q6PL24
27.0154	27.293	27.1104	27.1033	27.5748	27.425	27.4535	0.00650574	0.0312135	0.353906	MYO1C	F5H6E2;O00159
25.0893	25.3416	25.3893	25.2576	25.623	26.0436	26.0604	0.00654484	0.0314937	0.639528	SEC11A	H0YKT4;H0YNG3;P67812
24.7343	25.0473	25.0666	24.8417	24.5306	24.3275	24.4625	0.00656305	0.0315621	-0.482285	NEK7	Q8TDX7
24.398	24.4795	23.9783	23.8729	23.2339	23.4581	22.9459	0.00660768	0.0317059	-0.969529	ANAPC7	Q9UJX3
24.4492	24.5425	24.5709	24.3203	25.345	24.8481	25.0622	0.0066313	0.0316646	0.61435	TTC9C	Q8N5M4;E9PKV8;H0YDR3
21.6355	21.9497	22.1345	21.9294	21.0472	19.8908	20.6601	0.0066483	0.0316485	-1.37959	ITPR1	Q14643
22.623	22.8407	22.8078	22.7658	21.9023	21.893	22.4146	0.00671031	0.0316994	-0.689366	HINT3	Q9NQE9
26.0555	26.6078	26.4343	26.2781	25.5672	25.82	25.5097	0.00674524	0.0316917	-0.711626	CMC2	Q9NRP2;H3BPP2
23.5976	23.7729	23.5134	23.7611	24.3411	25.0438	24.3605	0.00677517	0.0317256	0.920533	NAA35	Q5VZE5
26.4441	26.3047	26.2821	26.1024	26.9094	26.6752	27.1503	0.00678518	0.0316598	0.628353	CD59	E9PNW4;E9PR17;P13987
28.0116	28.2063	27.7139	27.7142	27.3208	26.8943	27.1666	0.00680366	0.0317101	-0.784251	MAGOH;MAGOHB	P61326;F5H6P7
25.254	25.0994	24.6731	24.6901	24.2219	24.1534	24.0211	0.00685639	0.031843	-0.797055	QKI	Q96PU8;F5GXS8;F5GYM3;H0YGD6;H0YG47
24.3004	24.2413	24.5957	24.3949	23.2799	21.8947	23.0585	0.00691074	0.0321402	-1.63873	WDR92	Q96MX6
25.7001	26.0338	26.1485	25.9477	24.7555	25.4067	25.1384	0.00691089	0.0320741	-0.857312	ROCK1	Q13464;A0A0U1RQV4
28.5074	28.0886	28.5819	28.3735	27.5707	27.3309	27.8605	0.00695469	0.0321396	-0.800442	TUBB2B	Q9BVA1
25.6038	25.3103	25.1144	24.7092	26.2566	26.1346	26.1306	0.00699792	0.0323443	0.98952	SCAMP2	H3BV04;H3BN93;H3BUB6;H3BPL9;O15127
21.5026	22.343	21.7316	22.0449	21.0519	20.893	20.7883	0.00704825	0.0325072	-0.994478	BRD3	Q15059
21.8998	21.8991	21.0777	21.1467	23.4171	24.3153	22.7935	0.0071588	0.0333633	2.00279	PPAN-P2RY11;PPAN	A0A0A6YYI3;A0A0B4J1V8;Q9NQ55;C9J3W3;A8MV53
23.9168	25.0772	24.18	25.4078	22.3449	22.2509	23.0924	0.00717356	0.0332953	-2.08268	TLK1	Q9UKI8
23.1194	23.3069	22.3551	22.984	20.8365	21.4674	19.5504	0.00720456	0.0333333	-2.32328	MAP2K6	P52564
29.2513	29.4075	29.7022	29.4657	28.9918	28.608	28.8674	0.00731425	0.0342312	-0.634266	GBE1	Q04446;E9PGM4
26.3365	27.0139	27.4139	26.6362	27.991	28.4945	28.0636	0.00731497	0.0341619	1.3329	AHNAK	Q09666
29.5898	29.2146	29.2131	29.3415	29.7676	29.9258	29.7957	0.00732322	0.0341172	0.489947	PRDX5	P30044
30.5897	30.5941	30.663	30.5236	30.149	30.3964	30.3206	0.00735897	0.0342903	-0.30392	ACLY	P53396
26.0905	25.8004	25.5206	26.0369	26.4607	26.5818	26.6199	0.00736524	0.0342213	0.691992	HAT1	O14929
26.9966	27.5712	27.1684	27.3866	27.9354	27.8843	28.1464	0.00739398	0.0341526	0.707966	LMAN2	D6RBV2;Q12907;D6RIU4;D6RDX1
21.3794	21.884	21.791	22.1472	22.9898	22.7864	22.5107	0.00739922	0.0341563	0.961919	MMGT1	Q8N4V1
26.1195	25.9298	25.8852	25.4227	26.6274	26.9867	26.5796	0.00740416	0.034088	0.891966	RAB14	P61106;X6RFL8
25.819	26.1119	25.774	25.8415	23.7917	24.8996	24.8578	0.00750377	0.0343473	-1.37022	PHF6	A0A0D9SGE8;Q8IWS0;Q5JRC6
31.5517	31.4691	31.5161	31.0801	30.9069	30.7507	30.8036	0.00753122	0.034502	-0.583854	ALDOC	P09972;A8MVZ9;J3KSV6;J3QKP5;C9J8F3
24.2926	25.0109	25.0122	23.4821	22.594	22.7008	22.3447	0.00753265	0.0344334	-1.90293	RBM22	Q9NW64;E5RJW4
27.3511	26.9604	27.1502	27.075	26.6407	26.669	26.7667	0.00757638	0.0348016	-0.442033	HSPA4L	O95757;E9PDE8;D6RJ96
22.9783	23.3589	23.1425	23.2295	23.748	23.9724	23.5699	0.00758221	0.0349386	0.586095	PPP1R10	Q96QC0
28.4945	28.6295	28.6328	28.3109	28.9013	28.9114	28.898	0.00767664	0.0352332	0.386649	HK1	P19367
23.3284	23.613	23.7375	23.2487	22.9342	22.2682	22.4896	0.00771541	0.0354556	-0.917887	MFN1	A0A0C4DFN1;Q8IWA4
29.1881	29.001	29.234	28.9657	29.5463	29.5544	29.38	0.00772552	0.0353858	0.396369	RPS17	P08708;H0YN88;A0A075B716;H0YN73
23.632	23.5276	23.2401	23.9126	24.542	24.2407	24.2951	0.00773033	0.0353163	0.781179	POP1	Q99575
24.8978	24.7141	24.7571	24.7001	25.0141	25.3858	25.2753	0.00775168	0.0353882	0.457775	ACOX3	O15254
24.5316	24.3809	24.4246	24.317	24.0755	23.7579	24.0758	0.00779614	0.0353425	-0.443802	SNX27	Q96L92;A0A0C4DFU6
27.4144	27.3642	27.1819	26.9827	27.7631	27.7563	27.6966	0.00782284	0.0352734	0.502879	PYCR1	P32322;E2QRB3;J3KQ22;J3QKT4;J3QL24
28.1905	28.0608	28.3028	28.2672	27.6218	26.8576	27.4822	0.00783418	0.0353528	-0.884814	TTLL12	Q14166
25.501	25.3272	25.2829	25.4623	25.0695	24.6632	24.936	0.00785499	0.0353852	-0.503767	GNA13	Q14344
25.159	24.7613	24.9014	25.017	24.3606	23.8275	23.3744	0.00790126	0.0353631	-1.10551	TIMM50	Q3ZCQ8;M0R1Y4;M0R003
27.8295	27.3645	27.6122	28.2272	28.737	28.8669	28.5796	0.00797129	0.0360388	0.969469	CRIP1	P50238;K4DIB9;H3BRQ4
22.2591	21.438	22.4562	21.8614	23.1666	23.275	23.0491	0.00802531	0.0360851	1.15988	EMC2	Q15006
25.9506	25.4777	25.4778	25.8992	25.0764	24.969	25.067	0.00803094	0.0360541	-0.663862	CYBB	P04839
26.4464	26.4295	26.1879	26.8956	25.6902	25.4332	25.8158	0.00808314	0.036262	-0.843441	SLC16A1	P53985;Q5T8R3;Q5T8R5
26.7833	26.8182	26.5694	26.707	26.187	25.1681	25.486	0.00808391	0.0361923	-1.1058	CD53	P19397
26.36	26.6877	26.1124	26.5733	25.871	25.2782	25.4905	0.00808606	0.0361228	-0.886756	CD37	M0QZP6;B7ZAN3;P11049
27.4345	27.4839	27.2842	27.3386	27.1064	26.6705	26.8726	0.00810212	0.0360536	-0.502163	EML2	O95834;K7EIK7;A0A0C4DGQ7
24.8893	25.29	25.0903	25.2895	21.9228	23.9557	23.0966	0.00811773	0.0361071	-2.14804	SAFB2	Q14151
25.3029	24.7953	24.4682	24.9543	23.9388	23.7674	24.1145	0.00817177	0.036313	-0.939974	PARP10	E9PK67;E9PNI7;Q53GL7
29.4561	29.7015	29.962	29.5804	29.1714	28.7933	29.0509	0.00821549	0.0365638	-0.669802	ARHGDIA	P52565;J3KTF8;J3QQX2;J3KRE2
27.8207	27.9672	27.7881	27.7186	27.3042	27.5896	27.3649	0.00822547	0.0365323	-0.404076	MYO1E	Q12965
31.0521	30.894	30.854	30.9403	30.7404	30.5628	30.6594	0.00825491	0.0365996	-0.28091	CAP1	Q01518;Q5T0R1
17.4857	22.3865	20.8267	20.661	25.2633	25.4319	25.8384	0.00830015	0.0365985	5.17121	CCT6B	Q92526
22.7444	23.1024	22.6261	23.0364	21.1064	21.6098	19.7322	0.0083369	0.03662	-2.06118	PIP5K1A	A6PW57;Q99755
24.2676	23.4739	23.5404	23.5641	24.6296	24.6489	24.6447	0.00836772	0.036634	0.929545	HAAO	P46952;C9IY88
23.1072	23.4358	23.3612	23.3639	22.829	22.7222	22.2595	0.00836818	0.036565	-0.713433	TRAPPC5	Q8IUR0
25.556	25.8598	25.7592	25.526	25.1828	25.2814	24.9305	0.00842283	0.0368947	-0.543678	ALDH4A1	P30038
27.8792	28.1227	28.2129	28.1167	27.2881	27.7457	27.2998	0.00842347	0.0368255	-0.638368	EPB41L2	E9PHY5;O43491;E9PK52;E9PII3
27.0121	26.8509	26.6402	26.633	26.3433	26.2547	26.3532	0.0084777	0.0369963	-0.467001	SEC23IP	Q9Y6Y8
27.195	27.1518	27.0682	27.0939	26.6127	26.8174	26.9166	0.00848384	0.0369271	-0.344978	LSS	P48449;A0A0G2JQD0
24.9952	25.5318	25.4691	25.3715	24.3833	24.5803	23.6825	0.00854492	0.0369701	-1.12653	HMBS	F5GY90;A0A1W2PNU5;F5H345;P08397;F5H226
25.8731	25.8154	25.4725	24.9473	23.5273	23.3301	24.576	0.0085887	0.0370577	-1.71596	MTMR1	F8WA39;Q13613;Q8NEC6;H0YDX3;E9PIH9
26.5478	25.8736	26.7452	26.9421	27.7146	27.7528	27.5961	0.00864887	0.0375019	1.16064	SLC25A6	P12236
27.0973	26.7465	26.3716	26.7986	28.2139	27.4373	28.3938	0.00870485	0.0374768	1.26152	SH3BGRL3	Q5T123;Q9H299
29.4837	29.3655	29.6079	29.4409	29.1015	29.0883	29.2684	0.00874178	0.0376593	-0.321747	GNB2	P62879;E7EP32;C9JIS1;C9JXA5;C9JZN1
23.4096	23.2798	23.213	23.3986	23.0382	22.7995	23.0451	0.00897169	0.0381738	-0.3643	CNOT2	F8VV52;Q9NZN8;H0YI11;H0YH84;F8VRS8;F8W145;F8VP97
25.6842	25.1876	24.9933	26.8081	22.9264	23.984	22.3993	0.00898768	0.0382583	-2.56507	HLA-C	Q07000
25.6231	25.6981	25.8779	25.3586	25.2078	24.9176	24.8743	0.00905776	0.0382689	-0.639501	ARHGEF7	B1ALK7;Q14155;E7EUY6;E9PDQ5
28.9295	28.975	29.1976	28.5621	28.2684	27.7838	28.2035	0.00907134	0.0382941	-0.830799	PPA2	Q9H2U2;D6R967;H0Y9D8
23.6055	24.1074	23.5414	23.6343	24.3494	24.3148	24.547	0.00911443	0.0386422	0.681546	OPTN	Q96CV9
23.4187	23.7234	24.0603	23.8945	22.5341	22.0724	23.0848	0.00915351	0.0387619	-1.21047	NPC1	K7EQ23;O15118
24.6542	24.7002	24.2769	23.7592	23.0492	23.4514	22.7833	0.00924418	0.0392614	-1.25299	ANKRD13A	Q8IZ07;H0YIN8
24.9443	24.6869	25.2472	24.3314	23.7597	23.9631	23.7666	0.00925915	0.0391898	-0.972646	PFKFB4	Q66S35;Q16877;C9K0D8
23.7494	23.4809	23.3911	23.96	24.2428	24.9544	24.5739	0.00934424	0.0394244	0.945018	GNS	H7C3P4;F6S8M0;P15586;F5H4C6;H0YFA9
27.408	27.2163	27.2132	27.2776	26.6811	26.2051	26.8515	0.00934699	0.0393527	-0.699545	EPS15	B1AUU8;P42566
24.0568	25.4682	25.1941	25.0347	23.1324	23.6961	23.0663	0.00936166	0.0392813	-1.64019	EXOSC6	Q5RKV6
23.4924	24.2641	24.2906	23.1995	22.1591	22.0283	22.7072	0.00939065	0.0394638	-1.51345	NO66	Q9H6W3
25.2038	24.7564	25.2332	25.2949	23.7188	22.8747	24.2598	0.00940659	0.0394358	-1.50431	OAS1	F8VXY3;P00973;H0YI20;F8VUC8
25.1531	25.4131	24.9401	25.68	24.3476	22.9315	22.5557	0.009508	0.0396895	-2.01831	HMCES	Q96FZ2;D6RAZ3;E7EMP6;D6R9T3
21.0371	20.8085	21.1653	21.1004	21.6551	21.3755	21.4613	0.00951936	0.0398847	0.469491	FUK	J3KSP6;Q8N0W3
23.0456	23.147	23.1929	23.4227	23.521	23.6856	23.6802	0.00952311	0.0398489	0.426892	PPP2R5D	H0Y8C4;E9PFR3;Q14738;H7C5Q9
26.3438	26.6168	26.2137	26.2529	26.8745	27.2654	26.8439	0.00954312	0.0398492	0.637775	DKC1	O60832;C9IYT0;H7C0M1
28.3223	28.0715	28.1172	28.0434	27.4482	27.22	27.799	0.00959702	0.0401147	-0.649535	U2AF1	P0DN76;Q01081
26.9629	26.8006	26.5537	26.8314	27.7776	27.186	27.812	0.00963884	0.0402648	0.804748	TMED7-TICAM2;TMED7	A0A0A6YYA0;Q9Y3B3
29.0545	29.209	29.2878	29.0583	28.7196	28.9181	28.8004	0.00968429	0.0403286	-0.33971	GCN1L1	Q92616
21.4755	21.8503	21.9737	21.9074	22.6592	22.2733	22.8653	0.00969886	0.0402567	0.797526	CRK	P46108;I3L297
25.678	25.3731	25.8753	25.6235	24.0943	23.5487	24.9251	0.0097062	0.0401851	-1.44804	RAB11FIP1	Q6WKZ4;E7EX40
28.8029	29.0002	28.6284	29.1283	28.2775	28.4343	28.2968	0.00975111	0.0403481	-0.553716	SRP9	P49458;E9PE20
23.2286	23.6329	23.3608	23.1663	24.1723	23.9388	23.7931	0.00985566	0.0408582	0.620937	UBXN4	Q92575
23.5921	24.6133	24.8841	24.5363	22.9248	22.1331	23.11	0.00993056	0.0409133	-1.68384	POFUT2	Q9Y2G5;H7C2T5;A0A0C4DGX7
32.9095	32.6072	32.5677	32.5166	32.0592	32.3023	31.9662	0.00996165	0.040841	-0.540996	PRDX1	Q06830;A0A0A0MSI0
21.7391	22.1449	22.173	21.9158	22.545	22.9806	22.538	0.010001	0.0408748	0.694672	RIF1	Q5UIP0;H7BZN3
23.8986	24.384	25.1259	24.0456	25.7312	25.516	26.0159	0.0100957	0.0411268	1.39082	THEMIS2	Q5TEJ8;H7C124
28.0673	28.1771	28.2377	28.2276	28.4621	28.6215	28.3716	0.0101598	0.0413427	0.307668	SWAP70	Q9UH65;E7EMB1
26.402	26.668	26.0926	26.5915	27.1876	27.5952	27.0281	0.0101827	0.0414175	0.831772	MYDGF	Q969H8;M0QXF7;M0QYN0
25.8224	25.9383	25.9841	25.6249	25.4613	25.0882	24.8436	0.0102753	0.0419124	-0.711407	HDHD2	Q9H0R4;K7ER15;K7EMY7;K7EQD2
27.302	27.5881	27.2201	27.4754	27.8554	28.09	27.7674	0.0103911	0.0422727	0.507853	VCL	P18206
25.5913	25.7908	25.7741	25.8663	25.977	26.1881	26.1714	0.0104044	0.0422129	0.356523	WDR82	Q6UXN9
24.1921	24.3033	24.4764	24.2669	23.7772	24.0221	23.9859	0.0104713	0.0425157	-0.381305	DIP2B	Q9P265
22.6251	21.7099	23.9571	23.574	20.7218	20.6126	20.3577	0.0104793	0.0424765	-2.40255	GSTM4	A0A0A0MR85;Q03013
25.2471	24.7002	25.3164	25.4997	24.278	24.4326	24.3875	0.0105058	0.0424028	-0.824842	IAH1	H7C5G1;Q2TAA2;C9JE02
28.2032	28.1059	27.907	28.3195	28.4946	28.7933	28.62	0.0105454	0.0425927	0.502084	RPL23	P62829;C9JD32;J3KT29;B9ZVP7
25.6055	25.6146	25.054	25.3123	24.4566	24.5663	24.8833	0.0105481	0.042519	-0.76123	EMG1	Q92979;V9GYP5;A0A087WWQ2;A0A087WVM7
27.0117	27.1282	27.1771	26.8911	26.4048	26.7897	26.4445	0.0105621	0.0424456	-0.505712	SMC2	O95347
25.9872	26.5107	26.54	27.0852	27.4658	28.0423	27.6664	0.0106125	0.0426	1.19407	TAP1	A0A140T9T7;Q03518
23.1095	23.5024	23.1392	23.0452	23.9196	23.5879	23.9739	0.0106421	0.0427194	0.628087	FAM160B1	Q5W0V3
30.5299	30.2743	30.3792	30.4876	29.934	30.155	29.7506	0.0107672	0.0430928	-0.47124	CSTB	P04080;A0A1W2PQG6
30.2898	30.4275	30.3776	30.4226	29.8261	30.1647	30.0587	0.0108116	0.0430875	-0.362896	KARS	Q15046
25.6054	25.5531	25.4318	25.4038	25.2933	24.9861	24.9602	0.010893	0.0434589	-0.418695	PELP1	C9JFV4;Q8IZL8;E7EV54;I3L445
28.3091	28.33	28.3827	28.2299	28.0866	27.7976	28.0505	0.0109076	0.0433846	-0.334681	SNRPF	P62306;A0A0B4J254;F8W0W6
24.3788	24.4552	23.9679	24.0398	22.581	23.4625	21.9644	0.0109374	0.0435085	-1.54112	CTNND1	C9JZR2;O60716
26.6948	26.8045	26.6037	26.5916	26.1464	26.4244	25.9692	0.0109484	0.0434344	-0.493685	SLC9A3R1	O14745
24.9105	24.534	24.3947	25.3502	26.1459	25.6074	26.358	0.0109794	0.0433605	1.23972	RHOC	Q5JR08;P08134;E9PQH6;Q5JR07;Q5JR05
29.0174	29.1894	29.0577	28.7384	28.5754	28.5837	28.4436	0.0109815	0.043416	-0.46649	SF3B2	Q13435;E9PPJ0
28.1402	28.4614	28.0203	28.012	27.7279	27.638	27.5919	0.0111062	0.0439797	-0.505867	EIF5B	A0A087WUT6;O60841
26.3053	26.507	26.0042	25.9069	25.4312	25.6452	25.4011	0.0111185	0.0439052	-0.688369	EED	O75530;E9PJK2
24.9836	25.1812	24.8531	24.6514	23.5458	21.7559	23.4811	0.011201	0.044	-1.98971	YTHDF1	Q9BYJ9
24.2189	23.8087	23.9828	23.8512	24.5682	24.572	24.3052	0.011214	0.0439258	0.516391	POLDIP3	F6VRR5;Q9BY77
29.4063	29.4391	28.9144	29.3838	29.9268	30.4038	29.8931	0.0112942	0.0446061	0.788685	RPL10A	P62906
23.5631	24.2968	24.1551	24.1878	23.1714	23.1177	23.4081	0.0113109	0.0446319	-0.81831	C9orf78	Q9NZ63
29.1662	28.7739	28.8857	28.5824	28.2263	28.1128	28.3718	0.0113145	0.0447047	-0.6151	PSMB1	P20618
25.7386	25.9964	25.7721	25.7624	25.5743	25.4122	25.5128	0.0113525	0.0446298	-0.317604	WDR12	Q9GZL7
26.2627	26.7631	26.3543	26.3875	25.0464	25.8814	25.5655	0.0113664	0.0446355	-0.944171	MAPRE2	Q15555;K7EL66;K7ERD8
25.0022	24.5571	24.4716	24.2279	23.6292	23.9613	23.5336	0.0114512	0.0450818	-0.856648	COQ9	H3BNT2;O75208;H3BPY0
24.6075	24.7999	24.732	24.9822	25.1347	25.1154	25.1926	0.0115712	0.04562	0.367205	IMP4	Q96G21;E7ENR5;B8ZZ47;H0Y714;B9A008
29.269	29.1501	28.9907	29.312	28.7845	28.6598	28.8988	0.011584	0.0457038	-0.399465	EIF3M	Q7L2H7;J3KNJ2;H0YCQ8
25.682	25.4255	25.6323	25.5338	26.0028	25.7792	26.0459	0.0115935	0.0457741	0.374233	NANS	Q9NR45
25.8683	25.5052	25.5119	25.504	25.2484	25.1044	24.9749	0.0115955	0.0456982	-0.488105	TRMT112	F5GX77;Q9UI30
25.1475	25.0184	24.9303	24.8654	24.4098	23.5002	24.2284	0.0116638	0.045894	-0.94428	PRCP	P42785;E9PQB5;E9PL85;E9PQN3;E9PKN6;E9PIG4;E9PNF7
23.5715	23.2073	24.1268	24.075	22.4917	22.6565	22.882	0.01167	0.0458182	-1.06845	CR2	P20023;Q5SR47
21.1026	21.8444	21.3674	21.1186	22.7401	22.125	22.2251	0.0117172	0.0457954	1.00512	GALM	Q96C23;B8ZZ75;H7C1B5
28.3705	27.8765	27.9635	27.992	27.5466	27.5921	27.3567	0.0118067	0.0461746	-0.552175	GSR	P00390
26.9651	26.5299	26.74	26.3668	25.7852	26.1406	25.9845	0.0118104	0.0460987	-0.680363	PPP1CB	P62140;E7ETD8;C9JP48
25.0924	25.4967	25.9013	25.0376	26.3503	26.4208	26.2021	0.0118502	0.0463645	0.942395	CRTAP	C9JP16;O75718
24.0458	23.9697	23.6468	23.548	23.0885	23.3367	23.1852	0.0119881	0.0468525	-0.599067	TRMT5	Q32P41
22.3399	22.2604	22.0904	22.1514	22.8603	22.9886	22.4699	0.0120348	0.0469656	0.56237	TOR1AIP2	Q8NFQ8
23.8503	22.864	24.3553	23.4048	25.798	24.7758	26.1362	0.012137	0.0472288	1.95141	SLC25A3	F8VVM2
26.5081	26.6866	26.3671	26.6057	26.088	25.2993	25.822	0.0122257	0.0476411	-0.805456	MTX2	O75431;C9JNK6;C9JAZ1
23.9366	24.5242	24.645	25.0174	22.8258	23.0279	23.7237	0.0122488	0.0475961	-1.33836	PCIF1	Q9H4Z3
29.0605	28.9782	28.7739	28.7371	28.532	27.9884	28.2947	0.0123182	0.0477463	-0.615777	ANP32B	Q92688
25.4041	25.1356	25.0753	24.7735	23.9547	23.9966	24.6243	0.0124149	0.0479935	-0.905262	PTPN7	J3KR55;P35236;E9PE54;E7EUM0;H7C5I3
24.1413	24.5328	23.6403	23.9128	24.7543	25.3508	25.1144	0.0124378	0.0479741	1.01638	SP110	G5E9C0;Q9HB58;E7EM70
29.2218	28.9455	29.3945	28.7587	28.3792	28.2168	28.5354	0.0124413	0.0478964	-0.702973	HPRT1	P00492
29.5154	29.3708	29.1639	29.1839	29.8246	29.7975	29.6068	0.012471	0.0479418	0.434486	COPB1	P53618;E9PP73
22.0927	23.0486	22.3461	22.1629	21.0878	21.5018	21.4427	0.0124916	0.048071	-1.06845	IRAK3	Q9Y616
27.2371	27.3879	27.4654	27.1741	26.807	27.08	26.8298	0.0125585	0.0482319	-0.410537	CD2AP	Q9Y5K6
26.8801	27.3572	27.1301	27.0654	26.5533	26.7209	26.3227	0.0125592	0.0481736	-0.575846	VTA1	A0A087WY55;Q9NP79;Q5TGM0
26.0176	25.9883	25.501	26.1036	26.6676	26.4041	26.6248	0.0127623	0.0487705	0.662896	SAR1A	Q9NR31;H0Y5E8
24.2007	23.3147	24.7581	24.3081	22.6095	23.0152	22.4842	0.0129096	0.0491154	-1.44243	CIB1	Q99828
30.142	30.0289	29.62	29.7563	30.4805	30.3407	30.5384	0.0131169	0.049856	0.566418	MYO1G	B0I1T2
28.2197	28.262	28.0082	27.9317	27.667	27.7041	27.8054	0.0131515	0.0497891	-0.379872	CTPS1	P17812
23.313	21.9324	22.3169	21.8852	19.2234	20.5605	20.8405	0.0131563	0.0497927	-2.15374	NCF1	C9J155
30.0445	29.8709	29.501	29.8665	30.3783	30.7576	30.323	0.0131787	0.0500191	0.665576	RPS11	P62280;M0QZC5
29.2009	29.45	29.1243	29.2905	29.7249	29.939	29.5484	0.0133104	0.0503911	0.471004	RAB1B	Q9H0U4;E9PLD0
27.9978	28.0089	27.6911	28.1442	28.4359	28.3878	28.3516	0.0133565	0.0505905	0.431292	RHOG	P84095
21.9931	21.9214	22.2012	21.7273	22.9719	22.4483	23.4327	0.0133964	0.0507385	0.990266	MCEE	Q96PE7;F5GZ54;H7BZS7
23.842	22.282	23.8795	23.6026	21.4585	21.4395	21.9985	0.0134208	0.0507911	-1.76938	UBQLN4	Q9NRR5
30.3906	30.1908	30.1955	30.1366	30.4565	30.6246	30.4876	0.013466	0.0508373	0.294506	RPS12	P25398
31.0882	31.3161	31.2489	31.2	31.4599	31.8452	31.5777	0.0135427	0.0510032	0.414311	RPS3A	P61247;E9PFI5;H0Y9Y4;D6RG13;H0Y8L7;D6RAT0;D6RB09
27.5928	27.8351	27.9809	27.5963	27.288	26.7985	27.2393	0.0135541	0.0509228	-0.642707	SNRNP70	P08621
26.1775	25.9981	26.049	26.093	25.8075	25.6181	25.2784	0.0135591	0.0508428	-0.511387	RABEP1	Q15276
24.5232	25.0682	24.6843	24.5465	22.8496	24.1118	22.7795	0.0136553	0.0511397	-1.45858	DCAF7	P61962;A0A087WWI6
24.555	25.2628	25.4647	25.2659	24.3585	24.2127	23.8597	0.0136599	0.0510596	-0.993467	ITSN2	A0A087WVF7;Q9NZM3;E7EPJ2
21.9352	21.913	21.2768	22.7519	23.1551	23.3498	23.5103	0.0136771	0.0510736	1.36912	GALNT7	Q86SF2;H0YAH3
28.5858	29.0154	28.8364	28.6398	29.1703	29.4116	29.2008	0.0137772	0.0514875	0.49155	ATP5C1	P36542
25.7079	25.7841	25.6225	25.7861	25.46	25.5599	25.3116	0.0138477	0.051507	-0.281269	GMIP	Q9P107
28.6553	28.5726	28.6018	28.6597	28.4059	28.5331	28.4843	0.013856	0.0514268	-0.147859	RCC2	Q9P258
22.7702	23.5502	23.5861	24.6439	25.3472	25.3433	25.2862	0.0139055	0.0514277	1.68796	CASP1	G3V169;P29466;B4DVD8
29.618	29.1225	29.1335	29.1995	28.6587	28.8134	28.7289	0.0139148	0.051472	-0.534669	ANP32A	H0YN26;P39687
27.0448	26.5812	26.554	26.4351	27.331	27.1965	27.2361	0.0139451	0.0515039	0.600752	UGDH	O60701
21.8576	20.1383	19.4202	21.6096	25.573	22.7495	25.192	0.0140151	0.0517771	3.74841	HLA-A	A0A140T941;A0A1W2PQS8;A0A140T9Z6;B0UXQ0;P30512
24.9874	25.0776	24.8598	24.9919	22.0619	23.8767	23.6627	0.0141438	0.0520433	-1.77873	DNTTIP2	Q5QJE6
21.5637	21.457	21.1712	21.4499	22.346	23.1019	21.9965	0.014177	0.052	1.07103	ACAD8	Q9UKU7
25.203	25.2872	25.0691	25.2074	25.0121	24.7973	24.9363	0.0142261	0.0521048	-0.276449	PAPOLA	G3XAH6;P51003;A0A0C4DGK1;G3V2A0
27.1802	26.9852	27.2097	27.5264	26.6132	26.4378	26.8278	0.0142607	0.05208	-0.599126	RPA3	P35244;B5MC59
27.173	27.3154	27.5054	27.3441	26.8668	27.0666	26.6535	0.0142908	0.0520676	-0.472206	IDI1	Q13907;C9JKM8
28.7662	28.2467	28.2695	28.3709	28.9254	29.0649	28.8972	0.0142929	0.0519877	0.549202	ATP5F1	P24539;Q5QNZ2
23.2411	22.828	23.4822	23.4986	23.82	24.1402	24.0489	0.0143437	0.0522266	0.740572	NIFK	Q9BYG3;C9J6C5
26.5121	26.5754	26.2691	26.5042	26.7884	26.8971	26.7145	0.0143824	0.052318	0.334819	CDK6	Q00534
24.9197	25.1823	25.4104	25.1329	24.3734	24.1992	24.802	0.0144001	0.0522748	-0.703133	TLE3	F5H7D6
26.4727	26.3684	26.4457	26.2977	26.0329	25.4033	25.9066	0.0144252	0.0521951	-0.615162	SH3GLB1	A0A087WW40;Q9Y371
27.2266	27.2533	27.5484	26.9699	26.2599	26.8509	26.3258	0.0144322	0.0522131	-0.770683	GCA	H7C2Z6;H7BXD5;P28676
20.2892	19.6594	20.1651	21.2859	21.7879	21.824	21.8785	0.0144521	0.0521337	1.48027	DYNC1LI2	O43237;B4E2E0
27.7575	27.4003	27.4323	27.4088	27.7997	28.0592	27.9606	0.0144828	0.0521882	0.440134	LRBA	P50851;E9PEM5;H0YAC6
22.7914	23.1169	23.4828	23.2498	24.0706	23.6573	23.9408	0.0145129	0.0521576	0.729349	GSTM2	P28161;E9PHN7;E9PLF1;E9PHN6;F6XZQ7
25.358	25.2838	25.0052	24.9247	24.7196	24.1275	24.4886	0.014532	0.0521573	-0.697693	ZYX	H0Y2Y8;Q15942;C9IZ41
27.1459	27.0647	26.6714	26.7704	28.3788	27.4417	27.8239	0.0145952	0.0524411	0.968369	RPL37A	P61513;C9J4Z3;Q6P4E4;E9PEL3;G5E9R3;M0R0A1;M0R2L6
30.786	31.0086	30.7643	30.919	30.4298	30.5101	30.673	0.0146286	0.0523982	-0.331841	HNRNPD	Q14103;H0Y8G5;H0YA96;D6RAF8
28.1218	28.3546	28.21	28.1677	28.3946	28.5713	28.4763	0.0148137	0.0528373	0.267202	GTF2I	P78347
20.2186	20.9059	20.4268	21.8655	23.0483	22.3385	22.3677	0.014862	0.0527699	1.73064	RBM28	Q9NW13
26.4974	26.8998	26.6655	26.7081	25.9855	26.1974	26.3881	0.0148847	0.0527628	-0.502315	POLR2A	A0A087WWE2;P24928
25.0688	23.7159	24.1132	24.2429	22.8969	23.2716	22.7437	0.0148857	0.0526837	-1.31448	RPRD1A	A0A0C4DGQ6;Q96P16
19.067	19.2685	19.4042	19.1816	20.4716	21.7864	20.1319	0.0149164	0.0526766	1.56634	HLA-B	P03989
26.9954	27.2498	27.5856	27.6018	27.9109	28.0279	28.0531	0.0150796	0.0533274	0.63917		E7ENX8;A0A140T9S0
24.7933	24.8391	24.437	24.7023	25.0358	25.3267	25.1173	0.0151028	0.0534985	0.466992	CISD2	Q8N5K1;I3L1N9;D6RCF4
23.7354	24.8411	23.6828	23.8429	25.1675	25.5114	25.1057	0.01512	0.0534486	1.23596	SP140	Q13342
25.6376	25.6721	25.659	25.922	26.3619	25.9575	26.232	0.0151668	0.0535	0.461117	EIF1;EIF1B	K7EM18;P41567;O60739
26.4941	26.5987	25.9196	26.1328	25.1969	25.0082	25.7623	0.0151772	0.0534799	-0.963871	RAC1;RAC3	P63000;P60763
25.5215	25.1768	25.0137	25.3778	24.1511	24.7984	24.609	0.0152119	0.0535015	-0.75293	VPS11	Q9H270
29.6269	29.526	29.4753	29.3596	28.9111	29.2366	29.1826	0.0152276	0.0534993	-0.386821	TARS	P26639
23.5198	24.2623	23.3335	23.6637	22.5568	21.1445	22.4824	0.0152539	0.0534201	-1.63359	USP19	E7ESU0;E7EST9;B5MEG5;O94966
20.3302	19.5834	20.1947	20.5404	21.5039	23.3328	21.6257	0.0152568	0.053353	1.99193	PFN2	C9J712;P35080;C9J0J7;C9JQ45;G5E9Q6;C9J2N0
21.5473	21.2049	21.2141	21.6324	21.0362	20.5606	20.6697	0.015331	0.0536696	-0.644183	RHOT1	Q8IXI2;H7BXZ6
22.3198	20.845	21.9541	22.1277	23.1838	23.7164	23.1116	0.0153845	0.0538498	1.52561	CD274	Q9NZQ7
23.7536	24.5607	24.8025	25.2159	25.7751	26.0281	25.9394	0.015504	0.0543235	1.33102	MARCKS	P29966
22.5436	21.8368	22.1566	22.497	21.1179	21.4599	21.6556	0.0155146	0.0542438	-0.847371	PRKAR1B	H7BYW5;P31321;C9JSK5
28.1228	28.1492	28.1207	28.1196	27.4815	27.9019	27.8276	0.0155822	0.0545982	-0.391028	BUB3	O43684;J3QT28
24.8996	25.7274	24.8617	24.6105	23.8699	24.1317	23.8758	0.015588	0.0545886	-1.06569	TRIM27	P14373;A0A140T9B9;A0A140T9N6;A0A140T9V9;H0Y551;A0A0G2JIZ4
25.1778	24.8761	25.3535	24.5075	24.1837	24.2592	23.7915	0.0156715	0.0548129	-0.900576	ETV6	P41212
28.3965	28.2874	28.1703	28.2833	27.8379	27.3574	27.9382	0.0156823	0.0547679	-0.573202	NARS	O43776
24.4337	23.6926	26.7526	23.0069	20.9552	21.4148	20.1037	0.0156967	0.0547347	-3.64691	H2AFJ;HIST1H2AC;HIST1H2AJ;HIST1H2AH;HIST1H2AG	Q9BTM1;Q93077;Q99878;Q96KK5;P0C0S8
24.1045	24.2567	24.3612	23.6868	23.4247	22.9512	23.4956	0.0157387	0.0549578	-0.8118	GTF2E1	P29083;C9IYL4
24.0421	24.5495	24.4044	24.2445	23.7787	23.8443	23.3593	0.0157442	0.0548779	-0.649353	DENND4C	Q5VZ89;X6RAE7;X6R5W5
23.6226	24.4408	24.9769	24.1073	22.9747	23.2674	22.7523	0.015771	0.0548505	-1.28873	HSF1	E9PMQ6;Q00613;E9PI02
25.7851	25.8404	25.7039	25.2358	24.4364	22.4371	24.1578	0.0157979	0.0549623	-1.96422	COPG2	Q9UBF2
27.7096	27.9098	28.0969	28.4536	27.3572	27.1666	26.4846	0.0158051	0.0548828	-1.03968		A0A182DWH4
28.6391	28.585	28.4953	28.3249	27.9883	27.9748	28.2922	0.0158442	0.054948	-0.425968	NIPSNAP1	Q9BPW8;H7C2U6
26.3741	26.1218	26.3612	25.9904	27.0422	26.5793	26.7261	0.0158559	0.0548687	0.570658	GSTK1	Q9Y2Q3;E9PFN5;C9JNT3
26.7738	26.6264	26.3228	26.3549	25.3366	26.0308	25.8653	0.0160914	0.0562767	-0.775255	USP11	G5E9A6;P51784
25.4724	25.3993	24.9884	25.1112	25.7793	25.973	25.654	0.0161222	0.0563453	0.559261	DDX58	O95786;A2A376
28.7727	28.57	28.8327	28.3936	29.1571	29.2119	28.9759	0.0161524	0.0563563	0.47273	RPL30	P62888;E5RI99
21.4676	21.9125	21.6005	21.4303	21.9938	22.0994	22.2485	0.0162076	0.0564534	0.511181	FGR	Q5TGY6;P09769
23.7405	23.4679	23.3325	23.6367	20.5361	22.3402	22.3087	0.0162106	0.0563725	-1.81605	RNASEH2C	H0YEF3;E9PN81;Q8TDP1
25.6945	25.9047	25.4017	25.8141	26.0849	26.2449	26.4367	0.016219	0.056372	0.551776	SUMF2	J3KQJ1;Q8NBJ7;C9J660;H7C3B2;A8MXB9;F8WA42;C9JL30;E9PBT8;E9PG02;J3QT17
29.9519	29.9859	30.1355	29.7033	30.4544	30.2367	30.4308	0.0162202	0.0562914	0.42985	CLIC1	O00299
26.3813	25.998	25.8759	26.0854	25.6643	25.589	25.2752	0.016239	0.0564108	-0.575674	CTH	P32929
21.6731	21.6141	20.41	21.7419	20.3562	19.3122	19.449	0.0162921	0.0564501	-1.65395	HAUS6	Q5VY60;Q7Z4H7;Q5SYF9
29.237	28.9091	29.0015	29.2115	29.3629	29.5307	29.4782	0.016328	0.0564324	0.367469	ATP1A1	P05023
25.7667	25.633	25.6942	25.2311	26.318	25.9639	26.4457	0.0163531	0.0564602	0.661287	SEC24D	O94855;E9PDM8
26.2508	26.5548	26.4078	26.3037	25.6441	26.1341	25.5656	0.0164462	0.0566184	-0.597987	ACAP1	Q15027
26.9384	26.5976	26.5993	26.7301	26.245	25.9336	26.395	0.0164769	0.0566686	-0.525177	TRA2A	Q13595
23.3716	23.288	23.2775	22.8277	23.9374	23.577	23.9999	0.0164996	0.056645	0.646903	HEATR5B	Q9P2D3
24.7336	24.1031	24.3679	24.268	24.906	24.9835	24.9091	0.0165033	0.056565	0.564693	ADPRH	P54922;C9JZW7
27.6351	27.5435	27.6193	27.3087	27.1843	27.2452	27.0019	0.0165425	0.0566319	-0.382873	FAM49B	Q9NUQ9;E5RI16
19.9914	21.0957	20.5697	21.7047	22.1201	22.7246	22.5297	0.0166773	0.0570028	1.61777	ALG5	Q9Y673
24.9378	24.5936	24.3427	24.2914	25.1193	25.1251	25.3548	0.0167175	0.0569845	0.658359	GAK	O14976
23.3994	23.9298	24.4278	24.0594	24.7433	25.5492	24.9777	0.0167385	0.0569045	1.13593	SRGN	P10124
30.0239	30.0264	29.9415	30.0846	29.7202	29.9204	29.7209	0.0167388	0.0568247	-0.231972	OAS2	A0A087X0V5;P29728
27.6239	27.9893	27.8353	27.7477	27.4395	27.3972	27.5336	0.0167478	0.0567451	-0.34226	UPF1	Q92900
27.2339	26.7205	26.5322	26.9455	27.4477	27.9549	27.5241	0.0167762	0.0567329	0.784226	CAB39	Q9Y376;A0A087X0K1
29.6206	29.4789	29.275	29.3348	29.0012	28.4739	28.989	0.0167877	0.0566536	-0.605991	UBE2N;UBE2NL	P61088;F8VSD4;F8VV71;Q5JXB2;F8VQQ8
27.2558	27.4636	27.2736	27.2976	27.0854	27.1641	27.0396	0.0167929	0.0565746	-0.226312	PNN	Q9H307
26.9597	26.7918	26.6894	26.8218	26.322	26.5942	26.1121	0.0168049	0.0566017	-0.472903	NEK9	Q8TD19
31.294	31.0721	31.095	30.8508	30.6178	30.6884	30.7476	0.0169158	0.057057	-0.393389	LAP3	P28838
24.2232	24.3776	24.7229	24.9527	25.4844	25.3209	25.1414	0.0169598	0.0571667	0.746483	FAM129A	Q9BZQ8
23.2524	24.0333	23.4991	24.8058	22.1073	22.5621	22.5382	0.0169781	0.0571151	-1.49516	PXN	F5GZ78;A0A1B0GTU4;P49023
27.501	27.7134	27.6034	27.47	27.3304	27.3366	27.3577	0.0170098	0.057169	-0.230381	ARHGEF1	M0QZR4;Q92888;M0QYC1;M0R2C7
30.9096	31.1667	30.9874	31.3544	31.4859	31.7433	31.5146	0.0170422	0.0572503	0.476698	SLC25A5	P05141
29.5835	29.5348	29.437	29.2858	29.1598	28.9285	29.1933	0.0170793	0.0572983	-0.366411	KHSRP	A0A087WTP3;Q92945;M0R0I5
30.6132	30.4134	30.3508	30.4215	30.6652	30.6839	30.8069	0.0171866	0.0576	0.268952	EEF1G	P26641
29.6121	29.1492	28.9662	29.0344	28.3205	28.7211	28.0726	0.0172044	0.0575207	-0.819077	NASP	P49321;Q5T624
28.8747	28.8085	28.7877	28.6504	28.5435	28.5308	28.6255	0.0172422	0.0575186	-0.213711	SF3A1	Q15459
21.6649	21.5952	21.165	21.4566	22.3699	21.8717	22.7086	0.0172969	0.0575989	0.846301	STARD7	Q9NQZ5;C9JTD3
25.9675	25.9061	25.7585	25.6821	25.5596	25.3037	25.537	0.0173673	0.0576516	-0.361766	USP4	Q13107;H7C189
25.6311	26.0572	25.5959	25.8535	26.289	26.6053	26.1867	0.0174707	0.0579945	0.57592	PPP1R18	A0A0G2JHC2;Q6NYC8
28.1137	27.6176	27.6418	27.6494	28.3127	28.6122	28.187	0.0175659	0.0582326	0.615012	CD74	H0YBZ2;P04233
24.5123	24.5858	25.5386	25.6641	21.5579	23.7569	23.0894	0.0176655	0.0585082	-2.2738	DTD1	Q8TEA8;A0A087WZV9
23.5244	23.6973	24.0058	24.1602	24.5168	24.4527	25.0989	0.0177129	0.0585539	0.842547		H3BN98
25.4896	25.3088	25.492	25.9215	25.0135	25.0829	24.8556	0.0178273	0.0589482	-0.56897	APBB1IP	Q7Z5R6
24.9817	25.0913	24.9611	25.0233	24.9271	24.8452	24.8435	0.0178823	0.0589986	-0.142445	VPRBP	Q9Y4B6
21.9325	21.545	21.8107	21.8258	21.0111	20.2169	21.2359	0.0179771	0.0591848	-0.957208	NGDN	Q8NEJ9;G3V4G1;H0YJ17
25.9013	25.3766	25.4386	26.1737	24.7798	25.1072	24.716	0.018088	0.0595115	-0.854864	DCK	D6RFG8;P27707;D6RCP9
25.1687	25.1027	25.2613	25.436	25.5398	25.6192	25.9307	0.018119	0.059523	0.45438	GALNT2	Q10471
22.7321	22.7847	23.045	23.3327	21.4806	22.4434	21.0536	0.0181659	0.0597835	-1.31446	ESF1	Q9H501
27.3178	27.5723	27.4066	27.195	26.7769	27.1384	26.7576	0.0183019	0.0602054	-0.481937	TMOD3	Q9NYL9;H0YNJ8;H0YKU1
22.4078	20.9863	21.373	21.9032	23.0267	23.1052	22.7665	0.0183154	0.0601889	1.29859	HSD17B11	D6RCD0;Q8NBQ5
22.7478	22.3919	22.4388	22.7099	22.8762	23.493	23.2626	0.0183363	0.0602695	0.638475	UCKL1	Q9NWZ5
25.0353	25.1587	25.0345	25.1961	25.318	25.4325	25.2524	0.0183537	0.0602261	0.228145	NDUFC2;KCTD14;NDUFC2-KCTD14	O95298;E9PRJ5;E9PM14;A0A087WUM3;E9PQ53
26.6581	26.6666	26.0298	27.0389	25.5279	24.8573	25.8363	0.0184023	0.0602581	-1.19115	CBFB	Q13951;H3BSC0
21.68	22.697	22.3438	22.4458	23.1269	23.1851	23.2224	0.0184569	0.0604134	0.88644	ACTR10	Q9NZ32;V9GYX7;G3V2Q5;G3V5Y4;F6S9Y6
28.2252	28.8465	28.578	28.3022	27.8671	27.9541	27.9033	0.0185077	0.0604021	-0.579773	YBX1	P67809;H0Y449;C9J5V9
27.3844	27.4467	27.6655	27.1528	27.9234	28.3039	27.8184	0.0185268	0.0603909	0.602874	AIFM1	O95831
30.8307	30.9754	30.8784	30.7697	30.4846	30.7325	30.4762	0.0185691	0.0603797	-0.299107	MTHFD1	P11586;F5H2F4
27.9125	27.784	27.4902	27.4731	28.0876	28.4287	28.1106	0.0186105	0.060502	0.544	SUPT16H	Q9Y5B9
28.2384	28.296	28.1081	27.9726	27.7707	27.9015	27.8541	0.0187866	0.0608533	-0.311677	UBA6	A0AVT1
26.3999	26.5299	26.3274	26.0449	25.904	25.8158	25.9603	0.0187902	0.0607723	-0.432148	SKIV2L2	P42285
22.3916	22.5268	22.7203	22.2332	22.0217	22.1051	21.8012	0.0188444	0.0608245	-0.491938	HSD17B7	P56937
25.1014	24.9191	25.5158	25.9031	23.9085	21.0593	23.2521	0.0188568	0.0608446	-2.61995	NUDCD3	Q8IVD9
27.1908	27.113	27.0714	26.9666	27.2813	27.748	27.5129	0.0189618	0.0611618	0.428586	DDX6	P26196
25.9588	26.301	26.0429	26.146	26.5566	26.3278	26.5429	0.0192711	0.0621298	0.36358	STIM1	Q13586;G0XQ39;E9PNJ4;H0YDB2
22.0484	22.1229	21.9977	21.7948	21.4991	21.1462	21.7031	0.0193576	0.0623968	-0.541449	TMEM33	D6RAA6;P57088;H0Y8N0
22.2321	22.9772	22.2855	22.5374	21.8259	21.7978	21.8488	0.0193787	0.0624888	-0.683857	ENO3	P13929
23.5826	24.1606	24.3205	24.2492	24.8666	24.9441	24.6173	0.0194586	0.0628285	0.73116	NUP37	Q8NFH4;F8VTY2
30.7716	30.4981	30.4663	30.309	30.0786	29.7117	30.1314	0.0194654	0.0627457	-0.53731	CCT2	P78371;F5GWF6;F8VQ14
30.0417	29.9492	29.6351	29.6484	29.4215	29.4345	29.289	0.0194693	0.0626632	-0.436921	CNDP2	Q96KP4
24.613	25.6515	25.539	26.036	24.5179	23.8972	23.9744	0.0195037	0.0626807	-1.33006	YY1	P25490;H0YJV7
22.2685	22.6626	21.4451	21.1778	24.1212	22.9841	23.5799	0.0195323	0.0625984	1.67323	HSPA13	P48723
24.4614	24.5825	24.3662	23.8466	24.9631	24.9649	24.9611	0.0195754	0.0627628	0.648846	SYNE1	E7ENN3;A0A0C4DG40;Q8NF91
27.6391	27.0167	26.7557	26.8539	27.8653	28.3212	27.7841	0.0196478	0.062911	0.923814	RPL39P5;RPL39	Q59GN2;P62891
23.9964	24.1875	23.8481	24.8239	25.0185	25.0858	25.1287	0.0196987	0.0628601	0.863663	BAZ1B	Q9UIG0
26.5842	26.7309	26.5227	25.865	27.3555	27.2492	27.0755	0.0197219	0.0627781	0.80101	SOD2	A0A0C4DFU2;P04179;A0A0C4DFU1;F5H4R2;F5GYZ5;F5H3C5;G8JLJ2;A0A0C4DG56
22.987	22.1378	22.7431	23.1107	21.3458	22.1314	21.337	0.0197543	0.0627588	-1.13993	INTS9	G3XAN1;Q9NV88;E5RK47;E5RG70
22.7166	22.1822	22.1547	21.8066	23.2203	24.812	23.4174	0.01976	0.0626771	1.60152	MRPL33	O75394
29.4783	29.5123	29.269	29.3221	29.1455	29.0586	29.1978	0.0199996	0.0639844	-0.26148	G6PD	P11413;E7EUI8;E7EM57;E9PD92
25.3906	25.5442	24.9688	25.1936	26.0523	26.2639	25.6443	0.0200199	0.0640935	0.712534	TXLNA	P40222
22.4458	23.9724	22.963	24.0165	21.8183	20.9368	21.9484	0.0200288	0.0640519	-1.78158	CD79B	P40259
25.8352	25.0396	25.4007	25.4803	26.0478	26.5271	26.0839	0.0200663	0.0640777	0.780615	ATL3	F5H6I7;Q6DD88
22.431	23.1641	21.8481	22.333	24.2193	24.2474	23.2061	0.0201216	0.0645278	1.44688	NSA2	O95478;A0A0A0MQZ6
23.638	23.2168	23.5126	23.1809	22.55	22.2412	23.0267	0.0201255	0.0644444	-0.781073	SPAG7	I3L0X5;O75391
27.1809	27.1334	27.0769	26.8315	26.4243	26.511	26.8344	0.020361	0.0648361	-0.465795	GPHN	F5H039;Q9NQX3;G3V582
25.2584	25.1964	24.929	24.964	24.772	24.6275	24.7912	0.0204416	0.0648299	-0.356719	AKAP8L	Q9ULX6;V9GZ50
22.9401	22.7559	22.7337	23.8205	23.8825	24.2928	24.2519	0.0204587	0.0647465	1.07988	ATP2A3	Q93084
25.0919	24.6843	24.6468	24.2025	24.0136	22.6323	23.3456	0.0205555	0.0649049	-1.32587	CD226	Q15762;J3QR77;J3QQW1
27.7015	27.6798	27.4151	27.521	27.2325	27.0057	27.3428	0.0206215	0.0650783	-0.385682	DOCK8	Q8NF50;A2A369
26.3317	26.3959	26.1268	26.4314	25.8456	25.6559	26.1057	0.02064	0.0650462	-0.452397	UNC13D	Q70J99
25.1773	24.5797	24.7892	24.3871	23.6156	24.2429	23.8073	0.0206993	0.0651626	-0.844723	TATDN1	E5RG17;Q6P1N9;H0YBX2;G5EA19;U3KQS5;E5RGF2;A0A0D9SGD3
21.8441	21.7261	22.0689	22.1466	22.2689	22.3595	22.4246	0.020704	0.0650793	0.40463	PIH1D1	M0R2P8;M0R3A4;M0QXD5;M0QYA2;Q9NWS0;M0QYF4
25.1723	25.175	24.7204	24.8079	24.5792	24.195	24.4357	0.0207182	0.0651392	-0.5656	STK3	Q13188;A0A087WZ06
29.3671	29.2423	29.0675	29.1597	28.8712	28.9336	29.0044	0.020746	0.0651327	-0.272741	CAD	F8VPD4;P27708
25.6188	25.6249	24.9222	25.6162	26.2936	26.114	26.0677	0.0208528	0.0653656	0.712907	FDFT1	P37268;E9PNM1;A0A1W2PQ47
24.652	25.4458	25.0456	25.1038	24.4104	24.361	24.475	0.020906	0.0654351	-0.646355	KDM4B	A0A0C4DFL8;F5GX28;O94953;K7EQ54
28.1448	27.451	26.9492	27.3255	29.0941	29.8572	28.2728	0.020913	0.065352	1.60707	RPL24	C9JXB8;C9JNW5;P83731
25.629	25.0773	25.1497	24.7505	24.5773	24.2719	23.8704	0.0209639	0.0655685	-0.91176	KIAA0020	Q15397
27.4533	27.3639	27.4608	27.0283	26.2401	26.9008	26.7714	0.0210384	0.0658657	-0.689131	RBM8A	Q9Y5S9;A0A0J9YW13
26.0748	26.0042	25.8139	25.875	26.513	26.1153	26.4161	0.0210472	0.0658228	0.406151	CCDC50	Q8IVM0
22.8714	21.1338	23.6151	21.8411	24.5373	24.5588	24.4593	0.0211152	0.0659469	2.15312	CRELD2	Q6UXH1;A6PWM2
21.5412	21.734	21.3216	22.0777	22.3736	23.1843	22.3777	0.021146	0.0659141	0.97655	GSK3B	P49841
22.9386	22.998	22.9905	23.3016	23.8061	23.2998	23.9123	0.0211885	0.0661589	0.615525	KIF3A	J3KPF9;A0A087X011;E9PES4;Q9Y496
27.7745	27.8754	27.7172	27.7153	28.0995	28.0364	27.8782	0.0212399	0.0661713	0.234121	EFHD2	Q96C19;H0Y4Y4
27.7705	27.669	27.6227	27.6686	27.2598	27.5588	27.1493	0.021254	0.0661333	-0.36008	APEH	C9JIF9;P13798;H7C393
25.2077	25.6934	24.3835	25.4994	23.8083	24.0608	24.2003	0.0213302	0.0662111	-1.17287	RRP8	O43159
30.4987	30.6729	30.5813	30.3909	30.0641	30.2471	30.3331	0.0213722	0.0662233	-0.321189	DARS	P14868
26.7113	26.3868	26.4154	26.5064	26.0949	26.1182	26.2952	0.0214606	0.0664461	-0.335544	ALDH16A1	Q8IZ83;F5H4B6
26.5207	27.0896	27.0137	27.1086	26.2604	26.4117	26.4367	0.0214915	0.0664431	-0.563539	WAS	P42768
25.6819	25.5537	25.3347	25.0729	24.7825	24.759	25.0029	0.0216139	0.06664	-0.562696	RUFY1	Q96T51;J3KPP6;H0YA47
20.9252	21.8873	20.1441	20.9967	22.4036	22.2799	22.4729	0.0216673	0.0665568	1.39716	SLC25A19	Q9HC21
26.9627	26.577	26.6653	27.0391	27.3627	27.4348	27.1389	0.0216789	0.0665935	0.501066	LETM1	O95202
23.09	22.6011	22.6768	22.8583	22.4052	21.4491	21.9538	0.0216844	0.0665106	-0.87052	NUDT16L1	K7EIN2;Q9BRJ7;K7ENA3;W4VSQ8
26.5009	25.797	26.1111	26.2157	27.0836	28.0916	26.857	0.0217083	0.0664279	1.1879	SNRPD1	P62314;J3QLI9
25.0383	25.1987	25.1667	24.4479	23.8498	24.4177	24.1686	0.0217781	0.0667429	-0.817537	STK24	B4DR80;Q9Y6E0;H0Y630
26.8525	26.7927	26.6613	26.1928	26.1376	26.0148	25.8031	0.0218651	0.0668883	-0.639641	PDCD10	Q9BUL8;C9J5C3;C9J363;C9J6F3;H7C5M9;C9JSA3;C9JND6
24.9196	24.2001	24.4548	24.433	24.9833	25.1365	25.2628	0.0219253	0.0668748	0.625693	GYG1	P46976;G5E9W8;C9JQ42
28.5809	28.7555	28.3244	28.5914	28.1864	28.2541	28.1983	0.0219598	0.0668861	-0.350158	PDCD6	O75340;A0A024QZ42
22.9096	23.5889	23.0195	23.119	22.7475	21.7816	21.809	0.0219684	0.0668776	-1.04653	DYRK1A	Q13627
26.4453	26.3933	26.3933	26.2423	26.1934	26.1894	26.2105	0.0220165	0.0669679	-0.17085	CD38	P28907
24.9362	25.4279	24.8266	25.0095	24.5624	23.6575	24.2615	0.0220608	0.0671073	-0.889516	PUS1	F5H1S9;G8JLB3;Q9Y606
26.6602	25.4889	26.301	26.1623	27.424	26.9627	27.1286	0.0220864	0.0672217	1.01863	DNAJB11	Q9UBS4
27.9119	27.9756	27.721	27.7042	27.4241	27.1803	27.6019	0.0220945	0.067139	-0.426123	SNRPB2	P08579
22.9473	23.1341	23.0484	23.5982	23.6318	23.9392	24.3292	0.0221316	0.0672334	0.784736	FUCA1	P04066
25.3951	25.2205	24.6409	24.983	25.6835	25.6198	25.8556	0.0222572	0.0675141	0.659725	NOP2	P46087
25.6165	25.8097	25.4527	25.5856	25.3443	25.0155	25.2928	0.0223028	0.0675735	-0.398583	DERA	E9PPM8;Q9Y315;G3V158
33.8047	33.2757	33.6081	33.386	33.101	32.7175	33.0532	0.022383	0.0678727	-0.561392	LCP1	P13796
20.1736	20.9016	21.1876	20.3911	21.28	22.1227	22.1095	0.0224546	0.0679218	1.17392	GTF2H4	Q92759
24.4721	25.3882	24.4856	23.9237	23.1747	23.5888	23.2912	0.0225399	0.0681563	-1.21585	CAMK1D	A0A087WUR6;Q8IU85
26.0453	25.9809	26.0074	25.6726	27.7375	26.3265	27.2283	0.0225799	0.068122	1.17084	HLA-DPB1	P04440;A0A0G2JII1;H0Y7G7;A0A140T9P1;A0A140T976;H0Y5P2;A0A140T9Y0;A0A140T9I3
22.9728	23.1638	23.1839	22.9831	22.29	22.7163	22.7899	0.0225914	0.0681315	-0.477198	ZC3H11A	O75152;E9PBY7;E9PQ61
25.7277	25.528	25.6126	25.4603	25.0375	24.449	25.23	0.0226431	0.0681265	-0.676633	CBL	A0A1B0GW38;A0A0U1RQX8;P22681;A0A0U1RR39
24.4108	24.5083	23.9789	24.1116	24.7126	24.6827	24.9238	0.0226562	0.0680437	0.520634	TRADD	Q15628
28.0582	28.2236	27.8486	28.0326	27.7148	27.7383	27.7747	0.0229297	0.0684903	-0.298136	SF3A3	Q12874
27.8577	27.8398	27.5914	27.2642	26.9479	26.9696	27.2349	0.0229749	0.0684703	-0.587473	DCPS	Q96C86
23.6559	23.0239	23.3464	23.0136	21.9629	22.8587	21.9798	0.0229907	0.0683874	-0.992854	GBP4	Q96PP9
23.8758	24.0149	24.1044	24.0841	23.5816	23.8498	23.386	0.023104	0.0685804	-0.413988	RABL6	Q3YEC7;H0Y4Z8;G3V154;F2Z2T0
23.4726	24.2409	23.6493	23.9946	23.233	23.0515	23.2045	0.0231119	0.0685942	-0.676364	NDNL2	Q96MG7
23.3253	23.4082	23.1921	23.2365	23.1425	23.0734	22.9664	0.0232549	0.068994	-0.229718	CLPB	Q9H078;F5GX99;H0YGM0
28.5151	28.6573	28.5465	28.1678	28.0588	28.0027	27.5266	0.0232919	0.0691325	-0.60896	ESD	P10768;X6RA14;H7BZT7
26.0452	26.166	25.8059	25.5718	26.4531	26.3962	26.365	0.0233531	0.0691986	0.507536	ACAD9	Q9H845;H0Y8Z9
27.7835	27.707	27.472	27.6311	27.8394	27.9641	27.9938	0.0233546	0.0691154	0.284018	PTPN1	P18031;B4DSN5
24.3012	24.9537	25.3423	25.1889	24.2663	23.8815	23.8539	0.0233692	0.0690324	-0.945992	TRAPPC2B;TRAPPC2	P0DI82;P0DI81;F5H785
23.4064	22.8969	22.5442	22.6713	23.3786	24.1688	24.0218	0.0233748	0.0689496	0.976738	LZIC	K7ES95;Q8WZA0
29.3645	29.2734	29.2178	29.1614	29.0327	28.7586	29.0551	0.0233933	0.0690156	-0.305453	NPEPPS	E9PLK3;P55786
24.1571	24.6204	24.3337	24.5006	24.0922	23.7899	23.9717	0.0234078	0.0690096	-0.451681	UNC119B	A6NIH7
23.646	23.8288	24.342	24.5409	25.6229	24.6533	25.3419	0.0234335	0.0690036	1.11659	GBP2	P32456
26.6178	25.2254	25.8367	26.5744	24.113	24.7501	24.9862	0.023437	0.0689594	-1.44716	TNFAIP8	O95379;D6RCM8
27.1446	27.7943	27.3089	27.0628	26.8391	25.5069	25.2749	0.0234405	0.0688772	-1.45409	RBBP4	Q09028
26.1857	25.7544	25.8486	26.0151	25.2755	25.5945	24.7789	0.023473	0.0689524	-0.734628	MALT1	Q9UDY8
22.7941	23.5514	23.4817	23.9261	24.1324	24.5796	24.5307	0.023495	0.0689512	0.975908	SOAT1	P35610;B1APM4
24.5532	23.4947	23.1777	23.8342	24.7462	25.3032	24.8747	0.0236168	0.0693539	1.20974	MT-ATP6	P00846
28.231	28.1633	27.8802	27.9287	27.5116	27.8291	27.4777	0.0236779	0.0694187	-0.444689	HDGF	P51858
24.7313	24.4741	23.803	24.2987	25.5081	24.8458	25.3952	0.0239064	0.0699668	0.922931	GRSF1	H0Y8R1;F5H5I6;H0YAK1;Q12849
26.24	26.4876	26.4685	26.5527	25.9068	26.0931	26.2307	0.0239517	0.0700402	-0.360349	MAP4K1	K7ER95;Q92918;K7EKT6;K7EJS6
30.376	30.4145	30.3716	30.3248	30.0698	30.301	30.0229	0.02396	0.0700473	-0.240479	ANXA2;ANXA2P2	P07355;H0YM50;H0YN42;H0YMD0;H0YMU9;A6NMY6;H0YKS4
25.2191	24.6191	24.8111	24.8784	24.0201	24.5661	24.0319	0.023986	0.0700685	-0.675898	LGALS8	O00214;E9PN19;F6V2D4;B1ANM0;H7BXD8;Q5T3P9
28.4558	28.6252	28.3944	28.4206	28.1836	28.3333	28.2071	0.0239985	0.0700755	-0.232674	QARS	P47897
24.3316	23.9763	23.873	23.2919	24.5352	25.0871	24.7511	0.0240053	0.0700542	0.922945	RAB18	Q9NP72;A0A087X163
24.7387	25.1809	24.9147	24.8776	24.5485	24.6279	24.3148	0.0240185	0.0700706	-0.430891	FBXO7	Q9Y3I1
27.0515	27.0592	26.816	26.8103	26.539	25.8679	26.4895	0.0240467	0.0701434	-0.635468	ARL3	P36405
29.2645	29.4261	29.2661	29.387	28.7417	28.8094	29.2051	0.0240952	0.0703146	-0.417234	DDX3X	A0A0D9SFB3;A0A0D9SG12;A0A0D9SF53;O00571
26.8737	26.7125	26.3927	26.1754	25.9569	24.9953	25.732	0.0241187	0.0703072	-0.977221	NDUFA5	Q16718;A0A087X1G1;H7BYD0;F8WAS3
26.8668	26.8434	26.4448	26.9463	27.125	27.2997	27.2396	0.0241468	0.0703091	0.446158	AGK	Q53H12;E9PC15;A0A0G2JLG5;E9PG39
23.9696	23.9915	24.2573	24.6634	23.7416	23.1178	23.4731	0.0243612	0.0708585	-0.776287	TRPV1;SHPK	A0A0B4J2A0;Q9UHJ6
22.7453	23.2483	23.3306	22.8942	23.4041	23.9878	24.039	0.0245298	0.0712664	0.755679	ZC3HAV1L	Q96H79
22.8603	22.7684	22.2166	22.7738	23.2366	23.3665	23.1206	0.0245498	0.0711832	0.586446	MRPL21	Q7Z2W9;H3BUY0;F5H7V8
22.9111	22.12	22.0475	22.5577	23.0867	23.2791	23.1803	0.0245752	0.0711562	0.772976	GNL2	Q13823;H0YG10
22.5724	21.8868	23.4848	22.7772	23.9698	24.1302	23.7507	0.0246474	0.071404	1.26995	CORO1B	Q9BR76
32.0461	31.3799	31.5283	31.3054	31.0065	30.8391	30.9298	0.0247218	0.0716605	-0.639817	HLA-DRA	A0A0G2JMH6;P01903;Q30118;A0A0G2JH46
30.131	29.8671	29.9947	29.9324	29.5732	29.75	29.7922	0.0247918	0.0716702	-0.27615	ISG15	P05161;A0A096LPJ4;A0A096LNZ9
22.7745	22.7621	23.1982	22.4222	22.1415	20.7757	21.7554	0.024826	0.0716148	-1.23173	TAB1	Q15750
25.2775	25.3467	24.7536	25.4085	26.0808	25.9867	25.5906	0.0248261	0.0715319	0.689452	GLOD4	F6TLX2
21.7523	22.1733	21.9113	21.8692	22.8895	22.1666	22.9094	0.0248307	0.0714722	0.728655	LRRK2	Q5S007
29.7686	29.6992	30.0274	30.2624	29.6158	29.0163	28.8885	0.0248379	0.0713896	-0.765806	ARHGDIB	P52566;H0YGX7;F5H3P3
24.5529	24.4694	24.8149	25.1031	25.7411	25.0854	25.7477	0.0250898	0.0718938	0.789634	TBL2	E9PF19;Q96E41;Q9Y4P3
24.8961	24.9481	24.4863	25.1154	25.4039	25.7626	25.2914	0.0251448	0.0720369	0.624442	MAP1LC3B;MAP1LC3B2	H3BTL1;Q9GZQ8;A6NCE7;H3BTE7
27.2895	27.2704	27.2693	27.0395	26.8644	26.8333	27.0684	0.0252102	0.0723364	-0.295141	CRKL	P46109
25.8296	26.1302	26.0644	26.2123	25.5798	25.7604	25.7861	0.0255842	0.073206	-0.350338	DNAJB1	P25685;M0R080
22.8512	24.6015	25.2562	24.2802	22.4081	22.0637	22.5082	0.0256049	0.0731218	-1.92055	GAS7	O60861
26.0811	25.9744	26.0945	25.9341	25.6536	25.8902	25.8147	0.0256457	0.0732445	-0.23487	GALK1	P51570
26.0598	26.2422	26.1704	26.4204	26.6585	27.2289	26.5872	0.0258693	0.0739037	0.601709	LRRC59	Q96AG4
25.1526	24.7417	24.8008	24.3906	23.8293	24.3856	23.8662	0.0260316	0.0744513	-0.744388	CD47	Q08722
29.3032	29.2587	29.0345	29.6021	28.2699	28.8998	28.7526	0.0260629	0.0744577	-0.658868	ABRACL	Q9P1F3;Q5SZC9
24.9661	25.1956	25.3367	25.4713	23.7545	23.7727	24.9295	0.0262352	0.0749577	-1.09018	INF2	Q27J81;A0A0A0MQU1
23.8072	23.5598	23.5369	24.3105	22.9612	22.7335	21.3883	0.0262581	0.0749224	-1.44259	PBK	E5RFX4;Q96KB5
28.2862	28.2422	27.9884	28.0643	27.8307	27.9197	27.8756	0.026423	0.0755849	-0.269911	ELMO1	Q92556
23.0337	23.7996	23.557	23.9013	24.1282	24.6281	24.3795	0.026546	0.0757859	0.805718	DHX30	H7BXY3;Q7L2E3
27.7212	27.4467	27.4579	27.4001	27.2081	27.1211	26.6769	0.0265893	0.0758544	-0.504439	UBE2L3	P68036
28.9997	29.0869	29.1591	28.9328	28.8354	28.5081	28.8079	0.0266984	0.0762273	-0.327508	SARS	Q5T5C7;P49591
31.9334	32.0686	31.9504	31.8955	32.0658	32.2823	32.1755	0.0267235	0.076168	0.212533	ATP5A1	P25705;K7EK77
22.7627	23.4725	23.1213	22.8617	22.2463	21.4184	22.4642	0.0267309	0.076127	-1.01156	PI4KB	A0A0B4J1S8;Q9UBF8;E9PL47;F8W860
25.4812	24.83	24.7136	24.8833	25.7479	25.8342	25.4487	0.0267342	0.076077	0.699922	PCCA	P05165;A0A1B0GU58;A0A1B0GUX9;A0A1B0GWA1;A0A1B0GWI4
25.3941	25.3433	24.9764	24.849	24.8109	24.284	24.091	0.026804	0.0763891	-0.745363	MAPK14	B4E0K5;Q16539;E7EX54;B5TY33
20.897	20.7433	21.1471	20.8356	21.3202	21.1413	21.3084	0.0268043	0.0763028	0.350845	PHKB	Q93100
28.1638	28.2172	27.5311	28.3704	27.0608	27.4869	27.3959	0.0270279	0.0767901	-0.756057	CYB5A	P00167
25.5041	25.7502	25.4449	25.533	24.9598	25.2495	25.3285	0.0271016	0.0770056	-0.378807	BDH1	Q02338;E9PCG9;C9K0G7;H7C2W1
26.1912	25.2645	25.7199	25.799	25.2711	23.7031	23.7698	0.0271052	0.0769189	-1.49563	PIK3R2	O00459
27.6777	28.043	27.9403	27.7806	27.6415	27.4163	27.4941	0.0271349	0.0769359	-0.343107	NFKB1	P19838
26.1276	25.6846	25.254	24.5202	23.8925	22.34	24.1671	0.0272047	0.0769663	-1.93005	CMPK2	Q5EBM0
22.5393	23.1152	23.067	22.5892	23.5147	23.3257	23.372	0.0273381	0.0771582	0.576461	MPV17	B5MC53;B5MCF8;P39210;G5E9F5;E7EX18
25.6293	25.8333	25.5835	24.5496	23.8892	24.6654	23.4253	0.0273943	0.0772063	-1.40562	FCGR2B;FCGR2C;FCGR2A	P31994;P31995;V9GY83;A0A087WXE5;H0YGT0;P12318
24.549	24.9039	24.4838	24.8199	25.0605	25.009	25.2499	0.0274164	0.0772184	0.417317	COG7	P83436
26.3796	26.6498	26.9241	26.8141	27.0052	27.3533	27.231	0.0275669	0.0775705	0.504606	KIF2A	O00139
25.7776	25.6956	25.3521	25.6638	26.3455	26.5557	25.8581	0.027579	0.0776447	0.630807	IPO9	Q96P70
23.2952	23.2611	23.1711	23.2176	22.5099	22.857	21.7147	0.0275898	0.077558	-0.875679	CASP6	P55212;D6RHU3;D6RBM3
27.2256	27.369	26.9475	27.2079	26.615	26.8802	26.8864	0.0276063	0.0775251	-0.393675	PPID	Q08752
25.9784	26.3201	26.4385	26.161	24.9816	24.1831	25.7845	0.0277891	0.0777461	-1.24145	YTHDC1	J3QR07;Q96MU7
22.2292	22.0231	21.6715	21.7625	21.0231	20.0413	21.3585	0.0278467	0.0777709	-1.11396	COMMD7	Q86VX2
23.6188	24.6041	24.5487	24.7197	23.7294	23.0961	23.0673	0.0278697	0.0777733	-1.07529	ARHGEF18	A0A087WZG4;Q6ZSZ5;M0QZS0
23.3981	23.0439	22.99	22.9965	22.6459	21.4482	22.293	0.0279029	0.0779578	-0.978058	DSCR3	A8MTY9;O14972;A8MY26
33.5254	33.0045	33.2651	33.2009	32.8827	32.7908	32.8805	0.0279309	0.0779157	-0.397649	PFN1	P07737;K7EJ44
23.0855	23.3679	23.554	25.1813	21.571	22.4909	21.778	0.0280524	0.0780421	-1.85053	IRF2BP2	Q7Z5L9
27.5579	26.9056	26.6294	26.7314	27.7601	27.6055	27.8211	0.0281018	0.0782212	0.772795	RPS26;RPS26P11	P62854;Q5JNZ5
25.2516	24.2804	24.0152	23.8662	23.2584	22.6681	23.3648	0.0281349	0.0782674	-1.25625	SCAF8	A0A0A0MT33;Q9UPN6
22.3834	22.0695	22.3273	21.6109	22.6041	22.8836	22.8227	0.0282743	0.0786269	0.672361	C6orf106	Q9H6K1;Q5TH58
28.7389	28.7392	28.8084	28.6863	28.6217	28.4856	28.6494	0.0284186	0.079065	-0.157621	G3BP1	Q13283
23.3817	23.842	23.1669	22.5468	24.2912	25.0974	24.0757	0.0284249	0.078978	1.25377	PCF11	O94913
22.2366	22.7862	22.5617	22.5943	22.9267	22.9878	22.9614	0.0284318	0.0789307	0.413932	FAM134C	Q86VR2;K7ENZ6;K7EMF4;K7ELM8;K7EPD0;K7EJ42;K7EJ34;K7ENF4;K7EQI9
21.0338	21.2445	22.3282	21.5703	22.3828	22.6523	22.8157	0.0284627	0.078989	1.07277	PYGL	E9PK47;P06737
24.3701	23.3295	23.241	23.0348	22.1734	22.6208	22.3142	0.0288213	0.0799737	-1.12437	KIF15	Q9NS87;C9JKA9;H7BZT2
26.4945	26.657	26.2278	25.9997	26.9762	26.8162	26.8499	0.0288265	0.0799035	0.536008	GMPPB	Q9Y5P6
28.0462	28.1633	28.0127	27.8849	28.1544	28.4235	28.43	0.0288349	0.079816	0.3092	SEC24C	P53992;G5EA31
31.2126	31.0485	30.9985	30.9686	30.8199	30.6116	30.8831	0.0289522	0.0803107	-0.285492	GDI2	P50395;Q5SX87
23.163	23.8925	23.497	24.5211	22.1179	23.0483	22.3448	0.0290597	0.0807738	-1.26477	GPALPP1	A0A0A0MRI1;Q8IXQ4
28.135	27.6837	27.5865	27.8482	27.3328	27.4576	27.313	0.0290683	0.0806856	-0.445526	NT5C3A	X6RM59;Q9H0P0
26.4234	26.7292	26.3763	26.8686	26.1746	25.983	26.2359	0.0291183	0.080711	-0.468228	SLTM	Q9NWH9;H7C3F4
24.8573	24.6327	24.6736	24.4731	23.8357	24.4753	23.929	0.0291346	0.0807277	-0.579231	NDUFAF4	Q9P032
28.0157	28.0137	27.8992	27.8137	27.5484	27.8196	27.6355	0.0291802	0.0806964	-0.267716	GLRX3	O76003
23.3113	23.6961	23.3243	23.7889	23.112	22.7497	23.1113	0.0292136	0.0807652	-0.539172	SORL1	Q92673
27.1265	26.9003	26.7235	26.807	26.4287	25.5175	26.3354	0.0292999	0.0810727	-0.795457	PYCARD	Q9ULZ3
26.1175	26.2277	25.998	25.8836	25.8102	24.9511	25.3699	0.0295791	0.0818221	-0.67961	M6PR	P20645;H0YGE9;H0YGT2;F5GX30
30.4831	30.4667	30.1859	30.2118	29.8957	29.8856	30.1511	0.0296546	0.0818722	-0.359355	ARPC2	O15144
27.6013	27.4451	27.6036	27.312	26.7415	27.3292	26.7464	0.0296952	0.0820476	-0.551455	STK26	Q8NBY1;B4E0Y9;Q9P289
25.4516	25.1677	25.143	24.9422	24.8893	24.4647	24.7181	0.0297903	0.0821838	-0.485428	NIF3L1	Q9GZT8;E7EXA3;Q6X734
28.5038	28.5213	28.5633	28.3527	28.0695	28.0781	28.385	0.0299559	0.0825356	-0.307711	SSB	P05455;E7ERC4
25.328	24.4515	24.2576	24.4728	23.5108	23.9405	23.7222	0.0299792	0.0825415	-0.902974	PSMG1	O95456
29.1054	29.086	28.2705	28.6644	27.9425	27.8956	28.2403	0.0299821	0.0824526	-0.755443	LGALS9	O00182;J3KS82
24.5906	25.067	24.6617	24.3861	24.304	24.0349	24.0161	0.0300405	0.0824758	-0.558034	CHAMP1	Q96JM3
22.645	22.9973	22.9402	23.2069	23.8149	24.7307	23.4383	0.0301152	0.0824172	1.04728	ATP13A1	Q9HD20
27.7929	28.329	27.9596	27.6048	27.4861	26.4777	27.058	0.0301228	0.0823502	-0.914344	SRSF9	Q13242;H0YIB4
30.0467	29.6706	29.8384	29.7185	29.4562	29.5889	29.4602	0.030201	0.0824635	-0.31679	PAICS	P22234;E9PBS1;D6RF62
26.5715	26.178	26.1421	26.4352	25.9176	25.4601	25.9745	0.0303268	0.0825723	-0.547617	UBA3	Q8TBC4
27.457	27.6769	27.7617	27.7214	27.2236	27.5011	27.2695	0.0303416	0.0825824	-0.322864	CARS	B4DKY1
26.9839	26.9951	26.7175	26.5129	26.4389	26.3726	26.348	0.0303554	0.0824941	-0.415861	FAM162A	F8W7Q4;Q96A26;E9PH05
26.2998	26.0057	26.0315	26.1202	26.289	26.409	26.5507	0.0304708	0.0826923	0.301909	ANKRD44	Q8N8A2;H7C209
29.0217	29.0621	29.234	28.8817	28.754	28.7639	28.8376	0.0305398	0.0827108	-0.264711	UQCRC1	P31930
25.6634	25.3966	25.7645	25.2119	25.8668	26.2606	25.9927	0.0305638	0.0826951	0.530942	HSDL2	Q6YN16
22.4436	22.0306	22.4986	22.2897	21.8913	20.9936	21.7198	0.0305977	0.0826411	-0.780672	ZAK;pk	C9J3F7;D4Q8H0;Q9NYL2
28.566	28.4556	28.4726	28.4637	28.0516	28.4169	28.0943	0.0306652	0.0827021	-0.301858	USP7	Q93009;H3BND8
28.8748	29.1655	29.1859	28.9091	29.4307	29.2374	29.5859	0.0307434	0.0828268	0.384129	CANX	P27824;H0Y9Q7
24.5621	24.4953	24.8463	25.1014	23.9243	24.112	24.4068	0.0307497	0.0828323	-0.603571	VPS18	Q9P253
22.2363	21.9346	22.13	21.7242	23.8768	22.8648	22.5299	0.0308846	0.0832662	1.08422	SFXN2	Q96NB2;R4GMS6;R4GMR9;R4GN74;R4GNC2;R4GN63;A0A1B0GX61;R4GMW0;A0A0C4DGR6
25.3909	25.3381	24.9826	25.335	25.5095	26.0338	25.7474	0.0308938	0.083178	0.50192	EMC1	Q8N766
33.6034	33.4533	33.5893	33.2925	33.2358	33.185	33.2528	0.0309012	0.0830899	-0.260145	ALDOA	P04075;J3KPS3;H3BQN4;H3BPS8;H3BUH7;H3BR04
27.3878	26.4039	25.5524	26.9816	28.1061	29.4365	27.8181	0.0309349	0.0831205	1.87214	RPL34	P49207
24.055	24.389	24.5747	24.0254	24.6307	25.4604	24.9743	0.0309583	0.0831214	0.760797	DHRS7	Q9Y394;A0A087X0Z7;H0YJ66;H0YJE4;H0YJR8
24.1127	24.1811	24.2683	24.2002	24.2825	24.486	24.3599	0.0310229	0.0833755	0.185557	EIF2B3	Q9NR50;H0Y580
28.5653	28.8358	28.6628	28.4721	28.2435	28.4089	28.3533	0.0311126	0.0835026	-0.298742	RBM14	Q96PK6
22.3452	23.2751	22.6462	21.4795	20.8276	21.2313	21.1996	0.0311661	0.0836253	-1.35036	PDP1	Q9P0J1
24.8341	24.9423	24.5003	25.1106	24.4969	23.9854	24.3049	0.0312529	0.0837308	-0.584426	CCDC51	Q96ER9;C9JSW8
23.0656	23.3431	23.3283	23.5122	23.9525	23.5861	23.6715	0.0313076	0.0836681	0.424425	GLB1	P16278;E7EQ29
24.1825	23.6384	23.9163	23.6754	23.2438	22.947	23.5361	0.031319	0.0835803	-0.610807	MON1B	Q7L1V2;E7EW32;H3BUX9
26.5522	26.2832	25.8587	26.2488	26.6017	27.0481	26.8404	0.0313626	0.0836268	0.594342	STAT2	P52630;B4DLC8
27.2902	27.2922	27.3888	27.7284	26.1277	27.1347	25.7492	0.0313964	0.0837068	-1.08772	MARCKSL1	P49006
23.4184	22.0562	21.9866	22.9512	23.6444	23.8182	24.3073	0.0314007	0.0836192	1.32022	EMC10	M0R2A0;Q5UCC4
23.694	24.1162	24.7047	24.6551	22.4456	20.8639	23.4424	0.0314308	0.0835319	-2.04184	TEC	P42680
28.3357	27.5688	27.2039	27.468	28.7805	29.4654	28.2862	0.0315734	0.0841253	1.19998	RPL14	P50914;E7EPB3
26.7244	26.7987	26.8391	27.239	26.5032	25.9247	26.4467	0.0316071	0.0841794	-0.608772	RBM17	Q96I25;H0Y6J6;Q5W012
28.8716	29.2212	29.2606	29.0254	29.3902	29.5471	29.3783	0.0316266	0.0841542	0.343826	PRPF8	Q6P2Q9
28.9757	29.1238	29.2924	28.7634	28.4247	28.3098	28.789	0.031643	0.0840916	-0.531034	DAZAP1	K7EQ55;K7EK33;Q96EP5;K7EQ02
25.8345	20.1977	23.5089	25.0039	29.2906	26.7317	29.4295	0.0319127	0.0844906	4.84766	HLA-B	A0A1W2PPR8;P01889;F6U0H7
23.4914	22.7494	22.4581	22.8076	23.6563	23.6994	23.5786	0.0319234	0.0845026	0.768161	CTSA	X6R5C5;X6R8A1;P10619
22.9895	22.1891	21.7794	21.2793	21.2878	19.8808	19.5643	0.032015	0.0844855	-1.815	LRRC20	X6RK58;Q8TCA0;A0A0A0MS58
29.2413	29.5112	29.7278	29.0051	28.8671	28.6193	28.8711	0.0321389	0.0848332	-0.585522	SDHA	P31040;D6RFM5;A0A087X1I3
22.3971	23.4136	23.2288	22.4547	22.0197	22.0204	21.7945	0.0321956	0.0848778	-0.928668	GSTCD	Q8NEC7;D6R9W2
23.5341	24.3359	24.5741	23.8522	22.678	23.4514	23.1379	0.0322557	0.084848	-0.984998	GGA3	J3KSS7;Q9NZ52;J3KSG3
25.9634	26.0519	26.1761	25.8919	26.2233	26.3258	26.2081	0.0323002	0.085	0.231548	NOMO2;NOMO1;NOMO3	Q5JPE7;A0A0G2JP90;A0A087WW46;J3KN36;A0A0G2JN29;A0A087X117;Q15155;P69849
21.9535	21.1365	21.1593	21.7819	23.2436	22.0939	22.4966	0.0325356	0.0853333	1.1036	MRPL14	Q6P1L8
23.5517	24.2244	23.5176	24.3338	24.9142	24.4355	24.9011	0.0325682	0.0852701	0.843429	NCF4	A0A0G2JR51;Q15080;B0QY04
22.0121	23.0004	22.8636	22.7885	20.6188	21.5738	22.0063	0.0326303	0.0853018	-1.26651	MRPS18B	Q9Y676
21.5942	20.8574	20.8497	20.5863	22.0549	22.6518	21.5131	0.0327124	0.0853745	1.10138	SPG21	H0YMB7;H0YKB0;Q9NZD8;H0YLT5;H0YKM6
25.4556	25.2139	25.2798	24.8632	24.9137	24.0419	24.3886	0.032776	0.085554	-0.755037	IQSEC1	A0A087WWK8;Q6DN90;A0A0C4DGT3
26.5779	26.3991	25.8265	25.9881	26.8948	26.6911	26.8826	0.033048	0.0862628	0.624958	MAN2B1	O00754
28.0829	28.335	28.2686	28.147	27.7894	27.7546	28.0941	0.0330598	0.0861744	-0.32902	ABCE1	P61221;D6R9I9
30.3853	30.3046	30.2623	29.8738	29.8002	29.5838	29.8855	0.0330837	0.0860861	-0.449997	HNRNPL	P14866;M0QXS5
22.0924	22.1192	22.0534	21.9234	22.6898	23.2877	22.3046	0.0331814	0.086346	0.713573	PGPEP1	Q9NXJ5
31.333	31.3404	31.2054	31.3004	31.0677	30.8962	31.2005	0.0331848	0.0862577	-0.240022	FASN	P49327;A0A0U1RQF0
24.0115	23.6493	24.2836	24.1848	23.3122	23.6974	23.4196	0.0333488	0.0865046	-0.555922	ATXN3	S4R399;A0A087WXY4;D3VVH9;A0A087X1A8;G3V3R7;F5H211;P54252;G3V4F5;G3V4F4;G3V5H3;G3V328;C9JQV6;G3V3T0;G3V526;E9PJN5;G3V3T6;G3V4U9;A0A0A0MS38
20.6755	21.0668	20.7899	21.2704	21.303	22.1166	21.6462	0.0333717	0.0864571	0.737939	FXR2	P51116
25.7279	25.8841	26.2648	25.8336	25.2686	24.5602	25.5274	0.0336918	0.0872497	-0.808892	PRKRA	O75569;G5E9Q4
25.2619	25.8122	24.8064	25.3442	23.2109	24.8708	23.6447	0.0338296	0.0874175	-1.39735	MFI2	P08582
24.1849	23.9661	23.7477	23.7382	25.0012	24.5126	24.2103	0.0340156	0.0876623	0.665462	CTSZ	Q9UBR2
22.6881	23.6813	24.4024	25.8184	22.1834	21.5949	21.7839	0.0340401	0.0876098	-2.29351	MAP2K3	P46734
23.3442	22.768	22.5952	21.5859	23.7615	24.2363	23.684	0.034082	0.0877604	1.32061	LIPA	A0A0A0MT32;P38571;Q5T073
24.5391	24.2141	24.4143	24.372	24.9219	24.5856	24.6584	0.0341989	0.0880203	0.337086	ILVBL	M0R026;A1L0T0;M0QZX5
24.8798	24.7697	24.7678	24.5774	24.5529	24.5087	24.5346	0.0343553	0.088385	-0.216613	DCAF8	G3V3G9;Q5TAQ9;V9GY54
27.0508	27.5004	27.3754	27.2337	27.0656	26.8464	26.8191	0.0343739	0.0884211	-0.379747	MYO18A	A0A0D9SFK2;Q92614
28.5205	28.27	28.2915	28.3862	28.5026	28.7538	28.6292	0.0345106	0.0887846	0.261501	RPL31	P62899;C9JU56;B7Z4E3;B7Z4C8;B8ZZK4;H7C2W9
25.1404	25.3467	25.6596	24.9593	25.9375	25.7103	25.7888	0.034772	0.0893374	0.53568	EDF1	O60869
25.5414	25.7651	25.901	25.698	25.3713	25.481	24.9673	0.034897	0.089667	-0.453163	USP47	Q96K76
29.2638	29.16	28.9604	29.0271	28.9051	28.6993	28.8733	0.0349552	0.0896694	-0.276915	MCM6	Q14566
25.3492	24.1782	25.2943	24.477	25.8346	25.8891	25.7554	0.0349562	0.0895791	1.00169	TOR1AIP1	A0A0A0MSK5;Q5JTV8;J3KN66;H0Y4R4
27.197	27.2611	26.9319	27.145	26.5741	26.9108	26.8669	0.0353377	0.0905835	-0.349815	SNX3	O60493
22.9024	22.5729	22.1621	22.0471	23.2382	22.9407	23.1818	0.0353502	0.0904925	0.699078	CHCHD5	Q9BSY4
25.0033	24.9004	24.9255	25.0185	24.8002	24.4934	24.0898	0.0356674	0.0910843	-0.500768	DICER1	Q9UPY3
27.4171	27.3503	27.7966	26.9529	26.8179	26.6703	26.8546	0.0357348	0.0912497	-0.598294	CLTA	P09496;F8WF69
23.3205	23.736	23.4077	23.0581	22.3941	21.1347	22.7824	0.0357641	0.0911944	-1.27682	UTP14A;UTP14C	Q9BVJ6;Q5TAP6
26.3189	25.9583	25.8488	26.1456	26.3018	26.711	26.5393	0.0358904	0.0915756	0.449493	SNX1	Q13596;H0YK42
23.2214	23.3931	23.0431	22.2648	21.6023	22.4572	21.7229	0.03594	0.091596	-1.05312	BECN1	Q14457
25.7992	25.7521	25.2463	25.6229	26.0807	25.9213	26.2699	0.0359409	0.0915045	0.485538	HMOX2	A0A087WT44;P30519;I3L159;I3L1F5
25.161	25.6438	25.6548	25.3963	24.5995	25.1359	25.0034	0.0359749	0.0915289	-0.551047	WNK1	F5GWT4;Q9H4A3
28.182	28.346	28.4364	28.3053	28.1935	27.4736	27.646	0.036017	0.0915972	-0.54638	AHSA1	O95433;G3V438;H0YJU2;H0YJG7
27.8658	28.1705	28.0698	27.911	27.5561	27.8643	27.6083	0.0361404	0.0917928	-0.328068	SMCHD1	A6NHR9;J3KTL8
23.595	23.3859	23.1482	23.152	23.9706	23.5391	23.8836	0.0361435	0.0917015	0.477496	PYCRL	A0A0A0MQS1;Q53H96;B5MD87
26.6258	26.3879	26.365	25.9264	26.027	25.5709	25.4926	0.0363142	0.0920676	-0.629402	TES	Q9UGI8
23.7049	23.6094	23.1945	23.6987	23.2216	22.8934	23.1348	0.0363611	0.0921033	-0.468654	NUDT16	Q96DE0
23.383	24.1719	23.9994	24.4706	24.9693	25.4857	24.5593	0.0364122	0.092131	0.998577	CNP	P09543
23.1828	25.2194	24.2414	24.4851	22.5041	22.6421	23.1986	0.0364333	0.0920396	-1.50054	FMR1	A8MQB8;G3V0J0;A0A087WXI3;Q06787
25.9524	25.747	25.6412	25.8436	24.12	21.4661	24.6948	0.0364622	0.0919921	-2.36909	HLA-F	A0A140T9V0;A0A140T8X0;D0EV57;A0A0G2JPA3;A0A140T9B7;A0A0G2JH66;P30511;A0A140T9X6;A0A140T9W7;A0A140T9W3;A0A140T9D9;A0A140T9C2;A0A140T939;A0A140T9J8;A0A0G2JNV5
28.4354	28.6589	28.5969	28.552	28.8201	28.8362	28.6547	0.0365476	0.0921939	0.209544	EIF4G1	E7EX73;E9PGM1;E7EUU4;Q04637
23.8909	24.3122	22.5351	24.1406	25.0527	25.3122	24.9336	0.0366147	0.0922016	1.37981	NDUFB6	O95139;A0A087WZX2
31.4231	30.884	31.1177	31.181	30.9188	30.4305	30.5971	0.0366963	0.0924225	-0.502665	TPM3	A0A087WWU8
23.9171	23.7976	24.0275	23.0871	22.5656	22.7169	23.2523	0.0369533	0.092927	-0.862407	MRPS16	Q9Y3D3;A6ND22
28.4017	28.3286	28.632	28.2782	28.6867	28.7408	28.6226	0.0370281	0.0930049	0.273234	CYCS	C9JFR7;P99999
24.7583	24.0121	24.725	24.8341	25.3842	25.0452	25.4039	0.0371116	0.0932559	0.695398	ARF6	P62330
22.5389	22.8085	22.9549	23.0539	23.175	24.4857	23.7631	0.0371564	0.0932625	0.968908	UTP20	O75691
23.0378	23.9125	22.788	23.6182	22.7524	21.2013	21.9765	0.0372223	0.0934813	-1.36236	ATF2;ATF7	E9PEK8;H7C2N6;B8ZZU6;E9PBF9;P15336;K7ESA4;C9JCI8;K7ELQ4;P17544
23.9645	24.028	24.3582	23.5134	23.5264	23.1893	23.3102	0.0372628	0.0934446	-0.624088	CCBL1	B7Z4W5;Q16773
28.1583	28.3297	28.1942	28.2673	27.9853	28.1554	28.0539	0.0373152	0.0935255	-0.172506	NSUN2	Q08J23
24.2826	24.6802	24.4683	24.62	24.1172	24.1102	24.3105	0.0373609	0.0935593	-0.333473	DENR	F8VVL1;O43583
30.9359	30.9241	30.3825	30.4574	29.9015	28.7586	30.086	0.037574	0.0941057	-1.09292	RPS28	P62857
23.3259	22.4862	21.6679	19.5274	24.8987	24.0323	24.6534	0.0375801	0.0940137	2.77627	PARP9	Q8IXQ6
23.3621	23.4852	24.0063	24.0209	24.3079	24.1776	24.6176	0.0376305	0.0941055	0.649062	ALG2	Q9H553
25.2	23.967	26.0429	25.0847	23.6906	22.7894	23.8775	0.0376389	0.0940449	-1.62114	CD97	P48960
24.1796	23.9067	23.7411	22.939	24.665	25.0687	24.3632	0.0376778	0.0941326	1.00737	TRPV2	Q9Y5S1;H7BZK2
21.7211	21.8215	21.5723	21.5481	19.7723	21.4111	20.3888	0.0377803	0.0942941	-1.1417	HNRNPC	G3V2Q1;P07910;G3V576;G3V555;G3V575
21.3569	21.1418	21.4723	21.1978	21.4926	21.5826	21.8217	0.0377892	0.094214	0.340102	TBC1D10A	Q9BXI6;F8W9Y7;H7C471;H0Y5R9;H0Y2U5;F8WCD1;B5MD46;H7C1Q1
26.6905	26.7724	26.5875	26.7321	26.6078	26.4352	26.5151	0.0378268	0.0942507	-0.176239	WDR18	U3KQC1;A0A0A0MQU0;Q9BV38;K7EIR0
25.3371	25.4919	25.0609	25.4888	25.9906	25.5314	25.9638	0.0379585	0.0943534	0.483922	INTS3	Q68E01
25.0525	25.2014	25.0679	24.759	25.4969	25.2482	25.3712	0.037959	0.0942619	0.351857	DDB2	Q92466
20.9966	20.7379	21.0054	20.5833	21.1092	21.4951	21.2004	0.0379842	0.0942597	0.437464	TXNRD2	A0A182DWF2;D3YTF8;A0A182DWF3;Q9NNW7;A0A096LPD9;E7EWK1;A0A096LPK7;A0A096LNY7;A0A0U1RQX0
21.2619	21.7651	21.4028	21.681	21.2452	20.7883	21.0548	0.0379938	0.0941684	-0.498261	ANXA3	P12429;D6RA82
22.2558	23.8728	23.5464	23.0236	21.5706	22.2211	21.9862	0.0381758	0.0947969	-1.24869	DNMT3A	A0A0C4DG02;Q9Y6K1;F8WE91
24.7882	25.0676	24.6928	24.3359	23.7549	24.3782	24.0706	0.0381987	0.0947556	-0.653204	FAM103A1	Q9BTL3
25.2148	25.0604	24.925	24.6884	25.2584	25.3735	25.4698	0.0384224	0.0952587	0.395059	MRPL44	Q9H9J2
30.1926	30.4423	30.1049	30.0064	29.942	29.5668	29.8389	0.0384522	0.095298	-0.40397	TUFM	P49411
26.6348	27.1729	26.693	27.0751	27.8569	27.1349	27.7624	0.0385412	0.095341	0.690746	ATP5J2-PTCD1;ATP5J2	G3V325;C9JJT5;C9JU26;P56134
21.4486	21.3316	21.2456	21.1834	21.7457	21.4311	21.5828	0.0385717	0.0953802	0.284218	GHDC	Q8N2G8;K7ESN3
23.7792	23.3835	24.0093	24.0446	24.1242	25.0406	24.634	0.0386585	0.0954808	0.795463	SEC63	Q9UGP8
31.3976	31.2605	30.8449	30.9278	30.786	30.4319	30.6196	0.0388141	0.0958271	-0.495173	HNRNPA1;HNRNPA1L2	F8W6I7;P09651;F8VZ49;Q32P51;F8VTQ5;H0YH80
27.0313	27.1077	27.0882	26.8416	27.5646	27.409	27.1362	0.0390415	0.096334	0.352767	ATP5I	P56385
20.5211	20.7805	20.5789	20.6715	24.489	21.0403	23.6169	0.039139	0.0963068	2.41074	HIST2H3A	Q71DI3
25.2071	25.4152	24.9403	25.4405	24.9065	24.6044	24.9038	0.0392292	0.0962605	-0.445881	TRMT11	Q7Z4G4;K7ENP1;Q5JY01;Q5JY02
23.1183	23.7267	23.3518	22.7769	22.8428	22.0015	21.4411	0.0394116	0.0967349	-1.14832	RCOR3;RCOR1	E9PQE5;Q9P2K3;E9PPC5;E9PR63;B4DV59;Q9UKL0
23.804	23.7737	23.3327	23.6312	24.0976	23.8669	24.223	0.0395833	0.0971587	0.427126	RDH14	Q9HBH5
23.2224	22.7103	22.7346	22.4435	20.823	19.0144	22.0951	0.0396695	0.097276	-2.13354	NCSTN	H0Y6T7;Q92542
20.149	21.1211	20.8317	21.4933	21.8969	21.6676	22.0035	0.0396746	0.0971832	0.957186	BIVM-ERCC5;ERCC5	A0A1W2PS85;R4GMW8;P28715
24.5738	24.5637	24.2838	24.7495	24.9368	24.9115	24.7806	0.0398496	0.0976435	0.333601	RSU1	Q15404
23.5038	23.3354	22.8702	23.6258	22.9392	22.3836	22.7103	0.0399159	0.0976152	-0.656133	INTS1	Q8N201
25.2212	25.5414	25.1412	25.1822	25.6261	25.6677	25.4889	0.0401697	0.0982988	0.322784	ABCB7	O75027;A0A087WW65;B4DGL8
23.1319	23.1304	23.0585	22.8129	22.3824	21.0332	22.4364	0.040489	0.0988707	-1.08275	NUDT3	O95989
27.1557	27.1509	27.0166	26.9701	27.3924	27.5333	27.1648	0.0405758	0.0989896	0.290178	RANBP2	P49792
22.9311	22.7611	22.1904	22.618	23.0483	23.1531	23.2856	0.0407858	0.099518	0.537189	AP1S2	H7BZG6;H0Y673;F6SFB5;A6NH01;P56377
25.4934	25.8683	25.4242	25.723	25.0303	23.1455	24.6364	0.0408666	0.0997573	-1.35649	SEPT8	A0A087X142;A6NMH6;A6NFQ9;F8W8I8;Q92599
24.8872	25.6561	25.2059	25.3548	25.8448	25.9882	25.6707	0.0409973	0.100061	0.558599	TNFAIP3	A0A087WU80;P21580;D3TTY5;A0A087WXL5;A0A087X1N1
29.5009	29.369	29.3196	28.9781	29.0049	28.8717	28.8773	0.0410311	0.100079	-0.373929	PSMB2	P49721
31.8481	31.5144	31.5615	31.6168	31.8724	31.8442	31.9257	0.0410624	0.100087	0.245544	STAT1	P42224;J3KPM9
22.4045	23.3927	22.9054	23.1379	23.7277	23.6286	23.5834	0.0412188	0.100427	0.686393	PPP3CC	P48454;G3V111
27.1906	27.1801	27.3174	26.7012	26.8271	26.2781	26.478	0.0416769	0.101581	-0.569571	CBX3	Q13185
21.9131	20.188	20.5071	21.0996	19.6841	19.8948	19.435	0.0419225	0.10242	-1.25564	USP32;USP6	K7EQL6;Q8NFA0;P35125
24.5148	24.4647	24.2317	24.2403	24.7359	24.5512	24.6061	0.0420557	0.10264	0.268194	FAHD2A;FAHD2B	Q96GK7;C9JGM0;Q6P2I3
23.5445	24.6717	24.1007	24.0889	22.8771	23.4662	23.4045	0.0420818	0.10263	-0.852196	EEFSEC	P57772;C9J8T0
25.8595	25.7336	25.7153	26.5498	25.2586	25.4478	25.227	0.0421735	0.102835	-0.65342	NUDT4;NUDT11;NUDT10	Q9NZJ9;F8VRL4;F8VRR0;A0A0C4DGJ4;Q96G61;Q8NFP7
24.678	24.5027	23.9553	24.0224	24.8049	25.3836	24.8241	0.042229	0.103016	0.714592	TMEM263	Q8WUH6
21.7593	22.3662	21.6585	22.1635	22.5734	22.389	22.7731	0.0422682	0.103081	0.59162	SBF1	G5E933;O95248
25.9522	25.5845	25.0924	24.6799	24.4752	23.9419	24.5721	0.0422742	0.102984	-0.997514	DPY30	Q9C005
28.7487	29.2257	29.3474	29.226	28.3667	28.9107	28.3323	0.0424047	0.103255	-0.600357	KHDRBS1	Q07666
23.9447	23.7255	23.6448	23.853	23.6603	23.4809	23.4748	0.0426488	0.10351	-0.253346	GTF3C5	Q9Y5Q8;Q5T7U0;Q5T7U1;Q5T7U4;H7BY84
30.2211	29.965	29.9304	30.122	29.7775	29.5933	29.9081	0.0426764	0.10345	-0.300013	SRSF3	P84103;A0A087X2D0
24.7646	24.1012	24.9725	25.0637	23.8848	23.716	24.2417	0.042697	0.103384	-0.777987	STAT5B	P51692
24.438	24.3675	24.9438	24.2574	25.1676	25.1071	24.8398	0.0427103	0.103369	0.536459	CRYL1	Q9Y2S2
24.6492	24.7369	24.4784	24.3899	24.7865	24.9035	24.7984	0.0427745	0.103363	0.265868	TRIM22	Q8IYM9;C9JWC5;C9J060;C9JIU5
25.0431	25.6049	25.146	25.9336	24.4695	23.731	24.9626	0.0428398	0.103333	-1.04419	XRCC1	F5H8D7;P18887;M0QYS5
23.9225	24.0408	23.9	23.7379	22.7376	23.5323	23.5387	0.04327	0.104406	-0.630762	HMGN5	P82970;Q5JSK8;Q5JSL0;Q5JSK6
30.2357	30.4712	30.3591	30.3758	30.5311	30.4954	30.7303	0.0433496	0.104368	0.225171	SND1	Q7KZF4
25.5178	24.9605	25.1761	25.0394	24.6712	24.9176	24.5066	0.0433672	0.104271	-0.474971	SPN	P16150;C9JUK7
22.6406	22.7716	23.2435	22.1836	22.0542	22.1151	21.7312	0.0434755	0.104553	-0.742959	CNOT10	Q9H9A5;E9PCN5
22.2418	22.9913	22.2108	22.8525	20.8517	22.262	21.0897	0.0434796	0.104456	-1.17295	C7orf50	C9JQV0;Q9BRJ6;H7C0T1;H7C2R9
29.0851	29.074	28.7392	28.8273	28.6323	28.4599	28.7211	0.0434958	0.104359	-0.32695	PFAS	O15067
32.6317	32.5693	32.6397	32.4339	32.1699	31.4489	32.2775	0.0436536	0.104559	-0.603223	NPM1	P06748
20.8759	21.8895	21.454	24.9596	25.201	25.2556	25.1197	0.043658	0.104503	2.89735	ITGAL	P20701
25.2701	25.2882	25.5276	25.2802	24.9207	25.1968	25.1024	0.0437047	0.104484	-0.268244	RNMT	O43148;K7EP06
27.0901	28.1169	28.0541	26.9952	28.9384	28.6029	28.2889	0.043783	0.104513	1.04599	NDUFAB1	O14561;I3L505;H3BNK3
24.3233	24.35	24.3691	24.2151	23.6591	24.2318	23.4556	0.0438432	0.104468	-0.5322	PGGT1B	P53609
25.1488	25.4024	25.1797	25.2508	25.6559	25.351	25.5311	0.0438866	0.104453	0.267223	PPCS	Q9HAB8
26.7142	27.038	26.5701	26.7539	25.8569	26.5999	26.1158	0.043939	0.104423	-0.578179	FUBP3	Q96I24
23.5269	23.7639	23.9474	23.771	24.2421	24.8625	24.0258	0.0439866	0.104353	0.624514	UBR1	Q8IWV7;A0A087WTJ9
24.4674	24.6937	24.217	24.8059	23.9913	23.5114	24.2395	0.0439912	0.104257	-0.631971	SCO2	O43819
27.896	27.5045	28.1568	27.8438	27.424	26.8525	27.4487	0.0440122	0.104261	-0.608575	CAPZA2	P47755;F8W9N7;A0A0D9SET8;C9JUG7
29.9937	29.5441	29.4617	29.2724	29.0711	29.073	29.1056	0.0440249	0.104198	-0.484741	PEBP1	P30086
21.1825	21.3922	21.4583	21.2432	21.0929	21.1572	20.8814	0.0441042	0.104333	-0.275242	MCMBP	Q9BTE3
25.854	25.2615	25.8463	25.4853	25.3142	24.9038	25.0134	0.0441483	0.104285	-0.534638	SQSTM1	Q13501;E7EMC7;E9PFW8;C9JRJ8;E3W990
26.7461	27.029	27.1056	26.8804	26.6483	26.2607	26.7064	0.0442575	0.10441	-0.401833	ADRBK1	P25098;E9PRV7
25.0449	24.5455	24.9158	24.9555	25.6262	25.0924	25.3462	0.0442739	0.104314	0.489497	TOMM5	F8W8Z9;Q8N4H5
22.503	23.4086	23.6061	23.1319	23.849	23.8336	24.3764	0.044397	0.104686	0.857254	EML3	G3V195;B7WPE2;Q32P44
22.086	22.3117	23.4721	22.4168	23.489	24.0115	23.3987	0.0444805	0.104828	1.06141	FUNDC2	Q9BWH2;H7C0K8
30.9633	30.7701	30.6779	30.7262	30.6065	30.5402	30.5981	0.044489	0.104732	-0.202776	ATIC	P31939
22.162	21.8716	24.0001	22.2816	21.2898	19.5536	21.0637	0.044732	0.105183	-1.9431	NMT2	Q5VUC6;O60551
22.9451	23.4699	23.4505	23.5983	23.86	23.9277	23.7271	0.0447735	0.105087	0.472331	KIAA0391	O15091
23.7757	23.8976	23.8824	23.2723	23.0447	22.9772	23.4243	0.0447768	0.104992	-0.558309	RBM38;RBM24	F6VZ39;Q9H0Z9;E9PSF1;A6NG75;Q9BX46
25.5782	26.1022	25.8015	25.8706	25.3386	25.6393	25.2269	0.0448489	0.105009	-0.436515	TXN2	Q99757;M0QXH0;F8WDN2
26.9076	27.0751	26.7514	27.13	27.4626	27.114	27.6608	0.0449171	0.105066	0.446429	SAR1B;DKFZp434B2017	Q9Y6B6;Q9H029;D6RD69;D6R9R5
25.0996	25.1402	24.9435	24.6475	25.367	25.3116	25.2665	0.0449911	0.10508	0.357366	RIC8A	Q9NPQ8;E9PSI0;H0YEN0
28.3469	28.2833	28.3177	28.035	28.0562	28.031	27.9284	0.0452101	0.10552	-0.240489	USP5	P45974
21.0616	21.801	21.0827	21.1315	21.6855	22.1518	21.8731	0.045253	0.105588	0.634239	PAF1	Q8N7H5;B4DGJ5
24.2364	24.0725	23.8668	24.1879	23.0729	23.9497	22.7669	0.0453051	0.105597	-0.827772	PWP1	B4DJV5;Q13610
23.8156	24.1352	23.8592	23.7224	24.1724	24.6951	24.193	0.0453354	0.105646	0.470398	ISCU	Q9H1K1;F5H5N2;B4DNC9;B3KQ30
27.7784	27.7396	27.8699	27.3426	27.3492	27.0415	27.359	0.0453537	0.105659	-0.432747	PRPSAP2	O60256;E7EPA1;C9JJS3;C9K0K7;I3L0S1
28.6785	28.6419	28.6885	28.5637	28.4716	28.0038	28.4278	0.0455806	0.106101	-0.342083	HDAC1	Q13547;Q5TEE2
25.1467	24.4616	24.7081	24.7762	24.0589	24.3308	24.419	0.0458408	0.10652	-0.503579	PTER	Q96BW5;A0A0A0MSI3
25.8917	25.9424	25.7963	26.0715	25.51	25.8336	25.3539	0.046039	0.106899	-0.359607	TSNAX;DISC1	Q99598;Q5VVQ1;C4P0D6;C4P0D8
22.3109	22.9854	22.3478	21.9031	23.1231	23.0468	23.088	0.0461429	0.106929	0.699173	UBE3C	Q15386
24.5796	24.6448	24.7645	24.4446	24.7871	24.8134	25.0297	0.0461626	0.106833	0.268371	SCCPDH	Q8NBX0
29.086	29.1032	28.9479	28.9429	28.8797	28.7722	28.9144	0.0462068	0.106974	-0.164577	GART	P22102
32.5441	32.3821	32.1683	32.2312	32.7305	32.4804	32.7747	0.0462676	0.106957	0.330464	VIM	P08670;B0YJC4
28.012	26.6923	26.2645	26.5856	28.9851	30.9246	27.7881	0.0463618	0.107198	2.34399	HIST1H1B	P16401
20.831	22.0894	22.1837	21.2934	19.761	20.5312	20.8224	0.0464849	0.107506	-1.22786	TSEN34	E7EQB3;Q9BSV6;B0V3J0;A9C4B9;A0A0G2JNK5
25.784	25.6483	25.5972	25.7565	25.3178	25.0109	25.5876	0.0466914	0.107975	-0.39107	PRPF38A	Q8NAV1
23.3052	23.3732	23.0993	24.2646	24.1079	24.7607	24.3741	0.0467004	0.107879	0.903655	MRPS14	O60783
23.4961	22.9987	23.2933	23.3218	23.1237	21.4485	21.6428	0.0467338	0.10785	-1.20581	SMNDC1	O75940
26.5667	27.1293	27.1256	27.0702	26.4118	26.2893	26.7079	0.0467815	0.10795	-0.503266	FLII	Q13045
21.8068	21.8657	21.9893	22.2466	23.136	22.2514	22.502	0.0468123	0.107982	0.652723	VCPIP1	Q96JH7
28.8977	28.3258	28.2626	28.6073	28.0385	28.0444	28.1212	0.0469793	0.108192	-0.455319	TNPO1	Q92973
25.3816	25.2754	25.0225	25.2126	25.3869	25.9762	25.6313	0.0470648	0.108181	0.441762	C9orf64	Q5T6V5;Q5T6V7
23.3988	24.6158	23.9962	24.0201	24.6125	25.4606	24.8099	0.0470956	0.108131	0.953255	TMED4	Q7Z7H5;F8W7F7
27.228	27.4376	27.21	26.8865	26.7108	26.4894	26.9718	0.0471389	0.10817	-0.466528	PMPCA	Q10713
24.8937	25.3882	25.1629	25.8329	24.5276	23.2798	24.6893	0.0471713	0.108106	-1.15384	NBEAL2	Q6ZNJ1;H0Y764;H7C3Y7
27.8144	27.6901	27.212	26.9777	28.5076	27.7351	28.5836	0.047254	0.10828	0.851927	HLA-DRB1	Q29974
30.2363	29.8402	29.5293	30.2551	30.4828	31.0235	30.4297	0.0472833	0.108301	0.680151	RPS16	P62249;M0R210;M0R3H0;M0R1M5
27.4126	27.0531	27.0387	26.9731	26.6272	26.4826	26.952	0.047321	0.108244	-0.432095	TXNRD1	E9PIR7;F8W809;A0A087WSW9;A0A182DWI3;A0A087WSY9;Q16881;E2QRB9;E9PKD3
25.2453	24.7045	24.9327	24.6999	24.6758	24.1745	24.2795	0.0475265	0.108696	-0.519002	COG6	Q9Y2V7
25.1742	25.7231	25.8567	25.3835	24.7466	25.1477	25.0597	0.0477904	0.109239	-0.54974	DOCK10	Q96BY6
29.9446	29.6548	30.0143	29.771	30.0426	30.2227	30.105	0.0478433	0.109273	0.277276	MDH1	P40925;B9A041;B8ZZ51;C9JF79
21.8288	22.2317	20.2399	21.5101	22.8238	22.5906	23.0011	0.0478471	0.109177	1.35253	TOE1	Q96GM8
30.9682	30.9397	31.3112	30.9121	31.2789	31.3261	31.3777	0.0479778	0.10956	0.294798	TXN	P10599
26.1088	25.7898	25.7865	25.9509	25.4515	25.6495	25.7317	0.048061	0.109699	-0.298104	RFC4	P35249;C9JZI1;C9J8M3
28.7219	28.6458	28.2492	28.3547	28.0427	27.3749	28.1564	0.0482226	0.110091	-0.634863	C14orf166	Q9Y224;G3V4C6
23.2378	23.4738	23.088	23.6041	22.5519	23.1926	22.4029	0.048506	0.110824	-0.635159	CLIP1	P30622;J3KP58;F5H0N7
24.211	24.5034	24.93	24.8898	24.2978	23.7873	23.9692	0.0486637	0.111123	-0.615473	RILPL2	Q969X0
25.2448	25.312	24.7891	25.5301	25.5488	26.2664	25.818	0.0487384	0.111215	0.65872	AP2S1	M0QYZ2;M0R0N4;P53680;X6R390
23.3257	23.4559	22.7744	23.1903	23.4404	24.164	23.8847	0.0487806	0.11132	0.643156	OGFOD1	A0A0A0MTR2;Q8N543
29.0856	28.7615	28.9318	29.0188	29.127	29.2097	29.1727	0.0492823	0.112717	0.220353	ERP29	P30040;F8VY02
27.047	27.0574	26.7701	26.0842	25.9924	26.16	25.9246	0.0492963	0.112703	-0.714005	METAP2	F8VRR3;F8VQZ7;P50579
25.9503	25.8602	26.1692	25.7945	25.5841	25.794	25.5715	0.0496222	0.11368	-0.293698	RBM12	Q9NTZ6
25.36	25.9507	25.9011	25.6824	25.4158	25.0662	25.2927	0.0497406	0.113913	-0.46527	KIAA1033	A0A087X256;Q2M389
30.4769	30.3976	30.4509	30.2621	30.2043	30.248	30.2792	0.0497666	0.113813	-0.153084	GOT2	P00505
24.0803	24.5563	24.571	24.6897	25.4781	25.0418	24.7466	0.0497885	0.11377	0.614542	CMBL	Q96DG6
25.7227	26.3904	25.9421	26.7874	27.568	26.7303	27.0194	0.0498245	0.113748	0.895257	S100A11	P31949
29.4968	29.3272	29.2856	29.288	29.0799	28.7044	29.1987	0.049859	0.113788	-0.355076	PRDX6	P30041
26.2671	25.5972	25.3283	25.7992	25.0402	25.3195	24.9201	0.049862	0.113689	-0.654666	ITGA4	P13612
28.1452	28.5909	28.3304	28.2611	28.0582	28.0579	28.0115	0.049868	0.11359	-0.289361	INPP5D	Q92835;H0Y5Q9
29.7649	29.553	29.5734	29.2851	29.0587	28.8671	29.3824	0.0499245	0.113669	-0.441376	IRF4	Q15306;F2Z3D5
26.36	26.5594	26.5836	26.5542	26.4134	26.243	26.3165	0.0500155	0.113851	-0.190012	SMS	P52788;H7C2R7
25.44	24.9163	24.9398	24.9206	25.8451	25.6522	25.2688	0.0500576	0.113908	0.534508	ICAM3	P32942;K7ERN2;K7EP52
22.9907	23.07	23.8917	21.8606	21.8918	21.611	21.4764	0.0503247	0.114498	-1.29351	TRIM24	O15164
24.7536	24.7143	22.9125	22.3222	25.5994	25.332	25.8361	0.0505335	0.114728	1.91351	EIF1AY	O14602;A6NJH9
22.9226	23.1235	22.9488	22.7564	22.3635	21.5743	22.6709	0.0507805	0.114991	-0.734926	PASK	Q96RG2
23.2966	23.0837	23.2461	23.0648	22.5356	22.286	23.0878	0.0508073	0.114972	-0.536357	PDDC1	H0YE25;H0YF25;Q8NB37
24.397	24.8668	24.6843	25.0362	24.0306	24.3099	24.4369	0.0508219	0.114934	-0.486927	SAMD9L	Q8IVG5
29.5934	29.6025	29.471	29.3226	29.312	29.2468	28.8713	0.0509987	0.115359	-0.354018	ACAT2	Q9BWD1
26.2098	26.5105	26.5062	26.2982	26.5806	27.1149	26.6944	0.0510715	0.115411	0.415459	GFM1	Q96RP9;C9IZ01;F8WAU4
27.8258	28.2278	28.322	28.2552	27.7567	27.9289	27.6198	0.0511954	0.115653	-0.389228	STK10	O94804
28.3376	28.1677	27.8505	28.057	27.7701	27.822	27.7891	0.0513896	0.115955	-0.309449	SEPT1	J3KNL2;Q8WYJ6
18.9743	19.3164	20.8213	21.8538	22.0438	22.3485	22.4442	0.05145	0.116027	2.03741	PYGM	P11217
28.9971	28.9783	29.1256	29.0255	29.191	29.7785	29.3096	0.0514593	0.115945	0.394752	ATP5O	P48047;H7C0C1
27.6683	27.8979	27.7317	27.8672	27.0959	27.7177	27.2843	0.0514973	0.115846	-0.425318	COPS2	P61201;B4DIH5;H0YKU5
24.5556	25.5177	25.4544	25.3396	25.6293	26.0961	26.3917	0.0515933	0.116027	0.822239	PGRMC2	O15173
28.4699	29.1578	29.6146	28.6942	28.1679	28.2095	28.2711	0.0516888	0.116065	-0.767977	PSIP1	O75475
25.7708	26.2129	25.7866	25.9856	26.1882	26.4981	26.2447	0.0518811	0.116431	0.371366	PES1	B5MCF9;O00541;B3KXD6
21.7176	22.1282	22.4896	22.4577	21.1995	20.0643	21.7606	0.051893	0.116331	-1.19011	USP13	Q92995;H7C5J3
27.4591	27.7526	27.2218	26.9683	26.9447	26.8252	26.7153	0.0519729	0.116502	-0.522055	SNRPA	P09012;M0R268;M0QXK2;M0R221;M0R2B8;M0QZG7;M0R0G9
27.0676	26.983	26.913	27.0084	27.1575	27.791	27.2919	0.0519843	0.116402	0.420482	UMPS	P11172;E9PFD2
29.0086	28.877	28.6661	28.6014	28.4624	28.4849	28.5529	0.0521456	0.116596	-0.288207	TPP2	P29144;Q5VZU9
26.3578	26.5467	26.0911	25.6622	27.1917	26.7257	26.6262	0.0522655	0.116865	0.683423	MTHFD2	P13995;B8ZZU9
22.9445	23.1123	23.0748	23.3975	23.277	23.8849	23.6503	0.0523369	0.116969	0.47177	SCRIB	A0A0G2JNZ2;A0A0G2JPP5;Q14160;A0A0G2JMS7
24.5496	24.8149	25.0998	25.1648	25.3625	25.2686	25.3793	0.0525048	0.117298	0.429555	DNAJC11	Q9NVH1;B1AK20;Q5TH61
31.492	31.0854	31.6036	31.0449	30.9755	30.7424	30.8619	0.0526127	0.117447	-0.446521	YWHAZ	P63104;E7EX29;E7ESK7;B0AZS6
24.7922	24.4526	24.3779	24.6531	24.9845	25.5832	24.8275	0.0526845	0.117527	0.562826	CCZ1;CCZ1B	P86791;P86790
23.3705	23.8849	23.4028	23.8369	22.9894	23.3014	23.2143	0.0527472	0.11758	-0.455394	NEDD4L	A0A1B0GVY1;Q96PU5;K7ERN1
22.2329	22.8498	22.4117	22.1067	21.0784	21.8965	21.9354	0.0529611	0.117985	-0.763538	CD2BP2	O95400
25.3255	25.6425	25.6416	25.7449	24.7402	25.4942	24.7798	0.0530541	0.117912	-0.583903	UTP15	H0Y8P4;Q8TED0
22.9791	21.402	22.7928	21.6132	23.0435	23.556	23.9636	0.0530895	0.117975	1.32425	ARMCX3	Q9UH62
23.1154	23.2453	23.4068	23.6352	22.8535	22.9112	23.1413	0.0531551	0.118095	-0.382024	TMCO1	J9JIE6;Q9UM00;J3QQY2;J3KS45
27.4682	27.5653	27.4297	27.5344	26.6535	27.4505	26.8579	0.0532134	0.118197	-0.51209	IFIH1	Q9BYX4
24.3252	24.0695	23.9462	24.1809	23.8044	23.8352	23.9656	0.0532684	0.118287	-0.262035	SMARCB1	G5E975;Q12824;C9JTA6;A0A0G2JSE9;B5MCL5
20.9145	21.1777	21.0398	21.598	20.0588	21.0072	20.1691	0.0532741	0.118187	-0.770775	FANCI	F8W7R3;Q9NVI1;H3BP78
23.8642	23.9981	23.642	24.5114	24.7067	24.9311	24.3443	0.0533517	0.118296	0.656761	HDHD3	Q9BSH5
30.368	29.8154	29.8207	29.7102	29.5891	29.2626	29.4753	0.053427	0.118315	-0.486232	RPLP2	P05387
22.3146	20.9489	21.3243	22.3749	23.0068	22.6145	22.8732	0.0534492	0.118215	1.09083	FAM195B	I3L2L5;I3L317;I3L4Q0;C9JLW8
28.0347	27.7868	27.5339	27.6663	28.0623	28.5427	28.0546	0.053514	0.118186	0.464443	SSRP1	Q08945
23.9852	22.3626	23.8664	23.6119	22.4745	22.4021	22.0767	0.0535368	0.118087	-1.13874	RGS1	Q08116
26.0539	25.7496	25.9648	25.4756	25.5766	25.1843	25.3111	0.0535526	0.118025	-0.453641	UCHL3	P15374;A0A087WTB8;Q5TBK7
29.8824	29.6947	29.4694	29.7048	28.919	29.081	29.5876	0.0538237	0.118456	-0.491965	HNRNPA0	Q13151
27.1016	27.0073	26.8686	26.2897	25.99	26.4963	26.0614	0.0539608	0.118731	-0.634237	ITPA	Q9BY32
20.9057	21.0893	20.8083	21.7235	21.7272	22.4733	21.6548	0.0541374	0.118987	0.820084	MTR	B1ANE3;Q99707
29.0887	28.9059	28.7543	28.709	29.112	29.0665	29.2625	0.0543712	0.119419	0.28252	ERP44	Q9BS26
29.5569	28.7536	27.8603	28.8678	30.0828	31.0475	29.4253	0.0545078	0.119609	1.42557	RPL8	P62917;E9PKZ0;E9PKU4;G3V1A1;E9PP36
29.2526	28.8114	28.3789	29.0847	29.4856	29.8371	29.2898	0.0546044	0.11969	0.655638	RPL27A	P46776;E9PJD9;E9PLL6;E9PLX7
25.6874	25.9236	25.19	25.1559	25.7895	26.4123	26.3529	0.0546254	0.119617	0.69568	GMPPA	Q96IJ6;A0A087WUI8
25.1892	25.1977	25.0027	24.925	24.6494	24.922	24.1829	0.0546406	0.11953	-0.493904	STAMBP	O95630;C9JK83
27.5846	27.3766	27.563	27.4754	27.4544	26.9183	27.0039	0.0547394	0.119684	-0.374406	TXNL1	O43396;K7ER96
29.1112	28.8721	28.5385	28.9358	28.4543	28.5399	28.5244	0.0547428	0.119628	-0.358178	PSAT1	Q9Y617
23.7176	22.9501	23.3529	23.1797	23.953	23.7806	23.6824	0.0548638	0.119864	0.505229	RAP1A	P62834
25.8346	25.7755	25.6383	25.5609	25.47	25.5874	25.3624	0.0548832	0.119914	-0.229064	RAD21	O60216
26.2897	26.5855	26.4351	26.3823	26.1778	25.9662	26.3023	0.0548866	0.119814	-0.27439	NCAPD2	Q15021;E7EN77
29.1813	28.5556	28.8798	28.8357	28.5653	28.4361	28.4172	0.0548911	0.119715	-0.390235	PSMB3	P49720;A0A087WXQ8;A0A087WY10;A0A087WUL2
23.7369	24.3228	23.9454	23.7209	24.6292	24.2492	24.3457	0.0550833	0.12001	0.476537	UBE3A	Q05086;A0A0D9SG77;A0A1B0GVL3
26.9051	26.8507	26.8119	26.7314	26.7358	26.5818	26.3038	0.0552605	0.120331	-0.284294	RPS27	P42677;Q5T4L4
25.2123	25.8348	25.053	25.6975	24.8835	23.1659	24.5932	0.0553471	0.120393	-1.23523	CLINT1	Q14677
29.0727	29.1013	28.8043	28.7468	29.3054	29.1994	29.1437	0.055416	0.120423	0.284893	FABP5	Q01469;I6L8B7
22.7033	23.0254	20.5881	22.7118	23.6113	24.3423	23.9444	0.0554219	0.120363	1.70886	GTF2E2	P29084
20.4666	21.8753	19.4757	21.9508	22.5984	22.3825	24.1785	0.0555319	0.120702	2.111	SEMA4D	E9PFD9;Q92854
28.7737	29.0778	29.4958	29.129	29.4275	29.6133	29.7368	0.0556032	0.120666	0.473432	IFI16	Q16666
23.1063	22.891	24.0203	23.6239	22.1636	21.8089	18.3473	0.055656	0.120751	-2.6371	PLEKHF2	Q9H8W4
25.7607	25.6116	25.4415	25.3208	25.2064	25.3394	24.9611	0.0557002	0.120714	-0.364711	ARID1A	O14497;H0Y488;A0A1B0GTU5
20.8251	20.4799	20.7373	20.5764	20.5487	20.2453	20.2239	0.0557989	0.120878	-0.315374	RXRB	A0A0G2JKR7;P28702
28.4968	27.8693	28.1891	27.9719	27.8612	27.5194	27.6471	0.0561344	0.12203	-0.455872	SNRPD2	P62316;K7ERG4
25.406	25.2442	25.4867	25.074	24.8381	25.0735	24.2153	0.0562067	0.122143	-0.593811	NLN	Q9BYT8;E9PCB6;H0YAK4
27.6925	27.5138	27.3193	27.0724	27.0866	26.671	27.0237	0.0563079	0.122289	-0.472373	LUC7L2	Q9Y383;A0A0A6YYJ8
29.2677	29.2099	29.0516	29.0489	28.5248	29.0865	28.6671	0.0563247	0.122251	-0.385069	ELAVL1	Q15717
30.9501	30.7278	30.4627	30.5788	30.4846	30.3013	30.0861	0.0563264	0.122151	-0.389171	EIF5A;EIF5A2;EIF5AL1	I3L397;I3L504;P63241;F8WCJ1;C9J7B5;C9J4W5;Q9GZV4;Q6IS14
22.8364	23.4327	23.1258	23.6273	22.9135	22.4285	22.6699	0.056363	0.122172	-0.58494	RRAS	P10301
23.3598	23.1016	23.0606	22.7203	22.3304	22.5565	22.8324	0.0564357	0.122317	-0.487463	NDUFAF3	Q9BU61
24.4636	23.6613	24.0413	23.4769	24.3076	25.2078	24.7203	0.0566086	0.12287	0.834452	HTATIP2	Q9BUP3;E9PI87
25.6815	25.5334	25.6466	25.4199	25.1347	24.231	25.2653	0.0566955	0.12293	-0.69331	SRPK1	Q96SB4;H3BLV9
27.1322	26.7832	26.4052	26.7844	26.475	26.2442	26.2126	0.056777	0.123038	-0.465672	CHORDC1	Q9UHD1;E9PHZ2
25.2837	25.0486	24.7521	24.0875	23.6613	24.1883	24.0587	0.056854	0.12314	-0.823502	WDHD1	O75717
29.0012	27.8978	28.2378	28.3033	27.6619	27.5962	27.7735	0.0570568	0.123697	-0.682787	MTPN	P58546;C9JL85
21.0346	21.4924	21.7904	21.3667	21.7611	21.9898	21.9471	0.057063	0.123597	0.478306	CCDC93	F8W9X7;Q567U6
28.8757	28.7805	28.7278	28.4886	28.3427	28.4977	28.5171	0.0570729	0.123509	-0.265643	RUVBL2	Q9Y230;M0R0Y3
27.0918	26.882	26.9864	26.2786	27.3585	27.5164	27.2273	0.0571433	0.123562	0.557673	EWSR1	B0QYK0;Q01844;H7BY36;A0A0D9SFL3;C9JGE3
25.2425	25.7087	25.7257	26.3315	26.211	27.1782	26.5004	0.0571889	0.123507	0.877753	ATP2A2	H7C5W9;P16615
23.6095	23.123	22.8215	23.7431	24.243	23.6932	24.2025	0.0571941	0.123407	0.72194	ABHD12	Q8N2K0
23.3016	23.5756	25.5229	24.4423	26.1425	25.4291	25.6233	0.0572408	0.123368	1.52104	S100A6	R4GN98;P06703
30.7002	30.4329	30.554	30.3826	30.3707	30.0222	30.2703	0.0572426	0.123269	-0.296346	UBA1	P22314
26.6492	26.5896	26.5208	26.0997	26.7837	26.944	26.7976	0.0574794	0.123703	0.376935	GGH	Q92820
34.1562	33.7094	34.0557	33.7902	33.5845	33.5784	33.676	0.0576078	0.12391	-0.31493	ENO1	P06733;K7EM90
25.0151	25.3706	25.1047	24.8184	25.2823	25.5497	25.5287	0.0577679	0.124404	0.376375	CYTH1	Q15438;K7ERV8;K7ENQ8
25.5936	25.5489	25.1394	24.8962	25.9915	25.9487	25.5945	0.0577687	0.124303	0.550406	OCIAD1	Q9NX40;D6RG39;D6RIT9;D6RDK6;D6RBN5;D6RDI5;D6RA54;D6RC55
26.0276	26.1902	25.8427	25.9576	25.5775	25.1374	25.8593	0.057781	0.124213	-0.479755	PTGES2	Q9H7Z7;A6NHH0
24.0903	22.5639	22.6282	23.6313	23.9058	24.6665	24.8343	0.0579162	0.124325	1.24046	HLA-DQB1	Q29967;A0A0D5XQ77;A0A140T9Y4;A0A140T981;A0A140T9Z9
28.1969	28.3949	27.9193	28.1551	27.7978	27.6837	27.9993	0.0583021	0.125062	-0.339621	SAMHD1	Q9Y3Z3
29.2159	28.9936	28.4943	29.0989	29.6821	30.7119	29.3393	0.058318	0.124981	0.96043	RPL26	J3QRI7;J3QQQ9;J3QQV1;J3QRC4;P61254;J3KTJ8
24.0517	23.9118	23.7509	22.6571	22.5189	22.9373	22.3825	0.0584909	0.125404	-0.979972	ARHGAP35	Q9NRY4
27.6579	27.6542	27.9216	27.5316	27.5116	27.3515	27.4437	0.0584959	0.125303	-0.255706	SCRN1	Q12765
26.6671	26.7032	26.5938	26.5904	26.9647	26.8202	26.6837	0.0585645	0.125395	0.184231	SEMA7A	O75326;F5GYX3
23.3388	23.248	23.4331	23.5237	22.6792	23.3435	22.7268	0.0586316	0.1255	-0.469384	METTL1	Q9UBP6;H0YIH0
28.613	28.3826	28.1991	28.3318	27.9638	28.2651	27.8964	0.0587029	0.125713	-0.339855	TAF15	Q92804;A0A075B7D9
28.846	29.0854	29.061	28.9577	28.7389	28.8751	28.8174	0.0588631	0.126013	-0.177085	GOT1	P17174
21.9392	22.2449	21.8114	21.3492	22.4253	22.6261	22.2174	0.0592602	0.126795	0.586695	CDK9	P50750
28.8412	29.0444	28.8082	28.8184	28.4679	28.7737	28.6641	0.0593064	0.126981	-0.242808	DLST	P36957;Q86SW4
26.1057	24.4654	24.4732	24.7731	26.6551	25.557	26.7402	0.0594811	0.127263	1.36307	HLA-G	Q8MH48;Q5RJ85;A0A0G2JPQ3;P17693
22.2242	21.3542	21.6793	21.2172	20.6984	21.2169	20.7768	0.0596514	0.127646	-0.721348	TLE3	A0A0D9SES8;H0YKT5;H0YKN8;H0YL70;Q04726;H0YNT2;H0YNI7
27.0358	26.389	26.7078	26.5548	26.417	26.1842	26.0895	0.0597569	0.127847	-0.441595	TUBB6	Q9BUF5;K7ESM5
24.2723	24.8118	24.5887	23.9551	24.061	22.7567	23.582	0.0598054	0.127857	-0.940372	COQ5	Q5HYK3;B4DP72
25.7536	26.0685	25.985	25.7581	25.638	25.4623	25.7328	0.0598115	0.127809	-0.280278	MPP6	Q9NZW5;B8ZZG1;C9J4Q3
25.0497	25.032	25.2378	24.8283	24.9318	24.6041	24.569	0.0598954	0.127841	-0.335322	GNL1	P36915;A2AB27;A0A140T8Y2
24.165	24.8559	24.681	24.2881	24.0498	24.13	23.6513	0.0599377	0.127857	-0.553822	UFSP2	Q9NUQ7;D6RGX2;H0YA18
29.8655	29.9544	29.632	29.5457	29.4737	28.8967	29.4585	0.0599674	0.12787	-0.473116	SEPT2	Q15019;B5MCX3;C9J2Q4;H7C2Y0;C9JB25
26.2853	25.6339	26.2602	25.4705	26.4959	26.6618	26.4357	0.0601299	0.128251	0.618665	ABHD14B	Q96IU4;F8W9U3;B4DQI4
23.9748	26.1236	25.6764	27.5131	22.1117	24.917	21.3319	0.0601972	0.128434	-3.03508	RPL37	P61927
23.4064	23.6876	22.7467	23.238	23.8953	24.2061	23.6573	0.0602849	0.128668	0.649878	VAMP7	P51809
26.5484	26.3588	26.0805	25.8569	25.6479	25.6106	25.9312	0.0602959	0.128582	-0.481218	VPS29	F8VXU5;Q9UBQ0
24.8855	24.2291	24.2134	24.5307	24.1892	23.7375	23.8904	0.0603871	0.128655	-0.525644	TIA1	F8W8I6;P31483;C9JTN7;E5RGV5;H7BY49
23.627	23.5503	23.3244	23.1593	22.2316	23.3218	22.5079	0.0604956	0.12879	-0.728166	TSG101	F5H442;Q99816
25.3998	25.1195	25.0609	25.0148	23.4349	24.9783	24.2327	0.0605248	0.128726	-0.933434	GGA2	Q9UJY4
22.3097	22.0603	22.0775	22.6593	22.418	23.7293	23.3153	0.0605634	0.128691	0.877533	ACSL5	Q9ULC5
26.5503	26.4311	26.136	25.8685	25.8332	25.8954	25.5463	0.0606424	0.128797	-0.488169	EEA1	Q15075
28.3304	28.6816	28.5666	28.6966	28.7403	28.9824	28.8257	0.0606913	0.128803	0.280676	SUB1	P53999
21.3364	22.8706	21.0601	22.4397	20.8655	19.5222	20.8254	0.0609046	0.129149	-1.52234	BMP2K	Q9NSY1;H0Y9P1
24.5126	24.7297	24.8448	24.2503	25.2066	25.0736	24.8021	0.0611895	0.129808	0.443079	NDUFB1	O75438
24.0178	23.743	23.6613	23.7339	22.8782	23.5644	21.8589	0.0612046	0.129725	-1.0218	PSD4	Q8NDX1
25.291	25.1746	25.0756	25.2423	24.4083	24.9112	25.0393	0.0612295	0.129695	-0.409623	PCYT2	I3L1R7;Q99447;I3L1L9;I3L2Q1
29.0737	29.112	28.956	29.2931	28.7631	27.9028	28.7967	0.0612562	0.129631	-0.621175	SRSF7	A0A0B4J1Z1;C9JAB2;Q16629
22.719	22.8366	22.5832	23.0925	23.1851	23.8268	23.0862	0.0616025	0.130251	0.55819	RAB30	Q15771;E9PLM3;E9PRF7;E9PNB9;E9PS06;H0YDK7;E9PMJ1
23.7459	23.8098	23.4196	23.6903	23.3713	23.3576	23.494	0.0616414	0.13033	-0.258768	CPSF3L	Q5TA45;Q96HV7;C9IYS7;A0A087WYI0;J3QRY6;C9J979
24.3637	24.7201	25.1223	23.7452	23.5399	23.6544	23.7567	0.0619043	0.130638	-0.837467	LMO7	A0A0A0MTE2;E9PMT2;F8WD26;J3KP06;E9PMS6;Q8WWI1;H0Y424;H0YDG6;E9PMP7
26.2587	26.263	26.3607	26.0915	25.9232	25.8501	26.1848	0.0622908	0.131681	-0.25746	DARS2	Q6PI48
24.3703	24.9779	24.9163	24.4516	24.2948	23.4686	24.2138	0.0624029	0.132009	-0.686605	ANKZF1	Q9H8Y5;B8ZZS4
25.1669	25.5366	26.1643	26.5826	24.9478	25.1847	23.9643	0.0626301	0.132571	-1.16367	MYCBP	A0A087WV05;Q99417
22.0314	20.8361	22.0443	21.7737	22.7282	22.1951	22.7336	0.0626764	0.13263	0.880976	NISCH	Q9Y2I1;C9J715
27.8471	28.1536	28.2175	28.255	27.7653	27.2455	27.9066	0.0627077	0.132611	-0.479199	CSNK2A1;CSNK2A3	E7EU96;P68400;Q8NEV1
29.0459	28.5768	28.0117	28.3377	29.3213	28.8527	29.423	0.0630842	0.133336	0.705963	SSR4	P51571
23.7569	24.3545	23.5173	24.6117	24.7305	24.7537	24.8547	0.0634935	0.13402	0.719559	DCTN3	X6RA56;A0A0A0MRV8;X6RLR1;O75935;X6RCK5
22.9088	24.0109	23.6386	24.6666	23.0033	22.4378	22.7342	0.0635221	0.134025	-1.08114	NFYB	P25208;F8VSL3
22.4533	23.1744	22.6237	20.441	20.7956	19.2148	20.6469	0.0636599	0.13421	-1.95399	OGDHL	Q9ULD0
27.2652	27.8083	28.2875	27.2785	27.1538	26.1529	26.935	0.0639464	0.135075	-0.91265	BLVRB	P30043;M0R192
28.7596	28.8349	28.9879	28.5934	28.4622	28.3033	28.6752	0.0640384	0.135367	-0.31371	P4HA1	P13674
27.0961	27.4308	27.5598	27.5079	27.6198	28.0373	27.6995	0.0640647	0.135389	0.386927	NOP58	Q9Y2X3
24.6568	24.656	24.9921	24.4714	24.0761	23.3072	24.4724	0.0642625	0.135724	-0.742171	SLC16A3	O15427
24.1541	24.1825	23.5908	23.8711	24.234	25.0354	24.4266	0.064351	0.135777	0.615695	DPM1	Q5QPK2;H0Y368;O60762;Q5QPJ9
25.4576	25.0692	24.9879	25.1116	24.8043	24.9397	24.8215	0.0646181	0.136418	-0.301401	NRBP1	Q9UHY1;F8W6G1
25.3716	25.733	25.4006	25.8614	25.0648	25.334	25.2531	0.0648016	0.136652	-0.374392	MRPS34	P82930;C9JJ19
31.1675	31.0566	31.2169	30.6267	30.5995	30.7556	30.4694	0.0649211	0.136942	-0.408754	YWHAE	P62258
23.3351	24.9271	25.7543	25.2951	23.1076	23.7518	23.0177	0.0649257	0.136836	-1.53552	NOP16	Q9Y3C1;D6RIC3;A0A0C4DGU5;A0A087X2G6;D6RC60
23.6509	24.2884	24.4812	24.3838	24.9027	24.6125	24.7315	0.0653336	0.137665	0.547859	TRMT1L	Q7Z2T5
20.9836	20.3848	20.6927	20.7461	19.9169	20.2847	20.4837	0.0654211	0.137732	-0.4734	TGFBRAP1	Q8WUH2
24.3911	25.0976	25.3453	24.7364	25.4867	25.6943	25.3406	0.0655132	0.137709	0.614623	HNRNPK	Q5T6W2
21.9083	21.7175	21.6645	21.7725	21.876	23.4467	22.6851	0.0655441	0.137665	0.903542	SLC12A6	Q9UHW9;H0YMQ9;H0YKQ8;B3KXX3
23.8	23.5573	23.6323	23.3982	23.3875	23.3687	22.9658	0.0655481	0.137605	-0.356316	WDR70	Q9NW82;D6RIW8
22.7436	22.4368	23.7925	23.5615	22.3401	22.2441	22.0854	0.0656813	0.137859	-0.910399	VPS37A	Q8NEZ2;H0YBN0
27.1207	27.4113	27.6723	26.8865	26.7365	26.8213	26.8243	0.0657037	0.137784	-0.478654	CDV3	Q9UKY7
29.5152	29.2395	29.2018	29.3041	28.9199	29.1902	29.0909	0.0661445	0.138635	-0.248114	RPS10;RPS10-NUDT3	A0A1W2PQS6;F6U211;S4R435
24.4756	24.0862	24.0282	23.9042	23.9147	22.8552	23.515	0.0661756	0.138611	-0.69526	THOC6	Q86W42
21.4309	18.7892	20.2002	19.8202	24.0477	20.5272	23.4085	0.0665275	0.139614	2.60099	H3F3B;H3F3A;H3F3C	K7EK07;P84243;K7EMV3;B4DEB1;K7ES00;Q6NXT2
32.0031	31.457	31.4762	31.7176	31.2027	31.3346	31.3559	0.066545	0.139535	-0.365725	CFL1	P23528;G3V1A4;E9PP50;E9PK25;E9PQB7;E9PLJ3
27.889	27.7782	27.6579	27.4697	27.4938	27.3259	27.4706	0.0666026	0.139716	-0.268621	UBA2	Q9UBT2;K7EPL2
23.362	23.6699	23.1474	22.934	22.5607	22.6371	23.054	0.066603	0.139609	-0.527742	MRPL43	H0Y6Y8;B1AL05;Q8N983;M0R051
30.8523	30.7867	31.1791	30.6675	31.2698	31.0448	31.3642	0.0666287	0.139551	0.354875	CALR	P27797;K7EJB9
23.3523	24.086	23.656	23.6092	23.9184	25.5791	24.6213	0.0666978	0.139646	1.0304	ADO	Q96SZ5
25.4925	25.5928	25.7056	25.7123	25.0728	25.5618	24.6683	0.0668006	0.139777	-0.524852	IGBP1	P78318
24.9592	25.3443	25.229	24.8338	25.7401	25.2931	25.4792	0.0668149	0.139683	0.412512	ECI2	A0A0C4DGA2;O75521
25.2487	25.2639	24.6617	25.3456	24.5613	24.6766	24.7906	0.0669002	0.139702	-0.453785	YKT6	O15498
23.7746	24.3155	24.6085	24.554	24.6205	24.9873	25.1737	0.0669606	0.139687	0.614061	SEC61A1;SEC61A2	B4DR61;P61619;C9JJV4;Q8TC24;Q9H9S3
33.3325	33.4224	33.2199	33.3597	33.4503	34.122	33.647	0.0670243	0.139672	0.406185	HIST2H2AC;HIST2H2AA3	Q16777;Q6FI13
25.2526	25.16	25.4606	25.1478	25.0176	25.1226	24.9734	0.0670899	0.139639	-0.217384	RABGEF1	E9PFK9;Q9UJ41
22.1464	24.1428	23.6092	23.8348	22.304	22.0966	22.2192	0.0671134	0.139533	-1.22672	SAP30	O75446
26.6648	26.5504	26.6056	25.9299	26.0479	25.2448	25.9655	0.0672231	0.139639	-0.684917	PEF1	Q9UBV8
31.6249	31.6441	31.306	31.489	31.8835	31.6835	31.7196	0.0673258	0.139676	0.246207	RPS27A;UBB;UBC	P62979;J3QS39;J3QTR3;F5H6Q2;F5GYU3;F5H2Z3;F5H265;B4DV12;F5H388;F5H747;F5GXK7;J3QKN0;Q5PY61;Q96C32;P0CG47;P0CG48
24.8641	24.6564	24.9022	25.3053	25.2538	25.5232	25.2559	0.0673367	0.13957	0.412324	LARP7	Q4G0J3;D6RFF0
26.0528	25.6679	25.5637	26.1088	26.4124	27.611	26.2586	0.0676129	0.140254	0.912373	HP1BP3	Q5SSJ5;B0QZK4;X6RGJ2;Q5SWC8
23.6313	23.6157	23.7948	23.5837	24.3848	23.9399	23.7755	0.0676353	0.140275	0.377018	GABPA	Q06546
26.2107	25.6933	25.4072	25.9323	26.461	26.806	26.0581	0.0677197	0.140329	0.630825	NRD1	G3V1R5;B1AKJ5;O43847;F5H7V1
22.2163	21.9662	22.1734	22.0708	21.7522	21.769	20.7152	0.0677954	0.140332	-0.694532	RXRA	P19793
20.8521	19.7127	20.4523	20.4809	23.264	20.8217	21.6555	0.0678653	0.140561	1.53925	RAB13	P51153
22.3816	22.7646	22.3173	22.053	22.6318	23.0512	22.8542	0.0680801	0.141007	0.466603	KLC2	Q9H0B6;A8MZ87
28.6657	28.3339	28.6728	28.4633	28.7916	28.7098	28.7995	0.0681624	0.141259	0.233034	AKR1A1	P14550
24.8724	25.6089	25.8048	25.7393	24.1495	25.0024	24.967	0.0682724	0.141372	-0.800011	STX7	O15400
21.7771	22.0847	21.6266	22.1556	22.5779	23.7634	22.2532	0.0683129	0.141417	0.953845	CECR1	A0A087X0I3;B4E3Q4;Q9NZK5
22.9529	23.124	23.1183	23.5215	23.5885	23.4972	23.4674	0.0683593	0.141458	0.338537	TRMT2A	F2Z2W7;Q8IZ69
23.0349	23.7827	23.9045	23.8096	23.9195	24.5839	24.4138	0.0683633	0.141387	0.672837	PEX11B	O96011
23.9551	24.205	23.8749	24.0331	23.5666	23.9605	23.4125	0.0683911	0.141371	-0.370508	UBE2Q1	Q7Z7E8
26.0064	26.1627	25.7746	25.8449	25.4696	25.8539	25.5163	0.068427	0.141364	-0.333849	APIP	Q96GX9;S4R3D6
28.4235	28.7147	28.5571	27.888	28.0714	27.684	27.8178	0.0686133	0.141498	-0.538107	YWHAQ	P27348;E9PG15
24.5374	24.108	23.831	24.1893	23.2651	24.0473	23.244	0.0688234	0.141847	-0.647629	SNAP29	O95721
27.0126	27.1282	26.8368	26.9684	27.3611	27.0379	27.3441	0.0689659	0.142097	0.261218	STAT5A	K7EK35;P42229
24.7038	24.5707	24.6436	24.1896	24.1688	24.0902	23.0765	0.0692487	0.14281	-0.748453	SPRYD4	Q8WW59
23.4457	23.4404	23.1062	23.711	22.791	22.8944	23.2723	0.0694254	0.143125	-0.43992	ADAR	H0YCK3
23.8538	23.7639	23.2453	23.3773	23.9388	24.4782	23.8884	0.0694556	0.143078	0.541758	OPA3	Q9H6K4
29.0996	27.5443	27.2253	28.0725	29.3272	30.5665	28.6885	0.069569	0.143317	1.542	RPL7A	P62424;Q5T8U3
24.7509	24.7949	24.6202	24.949	25.1486	24.9877	25.8805	0.0696742	0.143341	0.560225	CASP7	P55210;A0A0A0MRL7;Q5SVL2
24.4623	25.2279	25.4054	25.1556	25.6704	26.1607	25.4428	0.0697685	0.143413	0.695185	MTDH	Q86UE4;E5RJU9
21.6142	22.8908	22.2747	23.108	23.2267	23.3446	23.7161	0.0698086	0.143414	0.957177	BPGM	P07738
26.6542	26.3945	26.5383	26.3469	25.866	26.4295	26.0347	0.0698234	0.143328	-0.37337	MMS19	Q96T76;H0Y746
30.9786	30.9421	30.8672	31.0223	30.728	30.882	30.8617	0.0702416	0.144526	-0.128617	ACTR2	P61160;F5H6T1
23.7483	23.8764	23.5299	23.2511	22.8081	22.741	23.487	0.0702671	0.144431	-0.589401	SLK	Q9H2G2
23.7886	22.8709	22.9459	23.0473	21.9625	22.6575	22.6787	0.0703695	0.144496	-0.730291	TBC1D9B	Q66K14;G3V133
24.5477	24.1534	24.108	24.2637	24.1881	23.6778	23.6541	0.0703836	0.144415	-0.428233	ATP2B1	P20020;E7ERY9
21.2574	19.5337	20.2873	19.8306	22.3773	20.7959	21.5429	0.0706113	0.144643	1.34478	DENND3	H0YAY3;E9PF32;A2RUS2
21.9268	22.0414	22.2977	22.6394	21.8931	21.5162	21.8233	0.0706677	0.14466	-0.482132	UAP1	Q16222
30.6957	30.2613	29.5431	30.3305	31.0266	31.8049	30.6051	0.0707116	0.144618	0.93793	RPS9	A0A024R4M0;P46781;B5MCT8;C9JM19
25.5965	24.8976	24.8435	24.6441	24.3834	22.9167	24.4002	0.071013	0.145141	-1.09534	IKZF2;ZNFN1A2	A0A0A0MSL2;A0A0A0MT14;B4DWF2;Q9UKS7
25.7526	26.6934	26.1401	25.7857	25.6037	25.0768	25.5735	0.0711091	0.145374	-0.674963	SFXN3	A0A0A0MS41;A0A1P0AYU5;Q9BWM7;S4R3N9
26.2789	25.9528	25.6752	25.6004	26.3741	26.1326	26.5599	0.0711229	0.145284	0.478684	CTSS	P25774;U3KPS4;U3KQE7
28.6291	28.5381	28.6151	28.325	28.0477	28.4578	28.1799	0.0714745	0.146398	-0.298393	STK4	Q13043;F5H5B4
22.4789	23.0094	22.9244	22.7235	23.4054	23.3095	22.9181	0.071525	0.1465	0.426974	RABL3	Q5HYI8;H7C533;F8WAX9;F8WF50;F8WDC7;C9JXM3
21.3583	22.2689	22.8879	23.9007	24.0793	24.708	23.6743	0.0717335	0.146704	1.54995	MRPL20	Q9BYC9;I3L2X1
23.9128	23.5327	24.1409	24.0061	23.7823	23.2096	22.9548	0.0722688	0.147979	-0.582546	COLGALT1	Q8NBJ5
22.5182	22.9418	22.7775	22.6481	22.0141	22.4938	22.4906	0.072289	0.147891	-0.388547	ZNF451	E9PH99;Q9Y4E5
25.4873	26.0398	25.2008	25.9757	26.9269	25.953	26.4252	0.0723752	0.147874	0.759141	FKBP2	P26885;F5H0N4
21.3937	21.048	20.9372	21.2445	21.5192	21.5569	21.3152	0.0724298	0.147959	0.307922	HPS5	Q9UPZ3;G3V159
23.7554	23.0999	23.6425	23.2134	21.7818	22.8108	23.0892	0.0728037	0.148684	-0.867236	BDH2	Q9BUT1
25.2001	25.0631	24.84	24.7179	24.6283	24.5469	24.754	0.0729706	0.148824	-0.312203	CIRH1A	Q969X6;H3BSH7;A0A0J9YWM9;A0A0J9YXV4;A0A0J9YWK2
26.1742	26.3329	26.3084	26.0489	26.4149	26.5293	26.3275	0.0731704	0.149448	0.207805	FMNL1	O95466;A0A0A0MR62;K7EK60
26.6267	26.949	26.8821	26.6386	26.6395	26.4218	26.5056	0.0733662	0.149845	-0.251836	EIF4B	E7EX17;P23588;F8VX11
22.3224	22.0699	22.365	22.0797	22.0076	21.1305	21.841	0.0734176	0.149843	-0.549573	MYL6B	P14649;F8W1I5
24.8016	25.9275	25.8262	26.1228	24.549	25.1718	24.6859	0.073493	0.149909	-0.867279	SYNE2	Q8WXH0;G3V5X4;A0A0A0MRE3;A0A0C4DGK3
30.1681	29.3489	28.2542	29.2745	30.5331	31.3179	29.8693	0.0736152	0.150022	1.31198	RPL7	P18124;A8MUD9
23.3978	23.388	22.3183	23.2641	22.698	21.3052	22.1712	0.0736214	0.149933	-1.03391	CDC27	G5EA36;P30260;I3L394
24.6565	23.9385	24.2651	24.0264	24.55	24.8721	24.6392	0.0736259	0.149823	0.465489	CCDC88B	A6NC98
29.362	29.0595	29.192	28.9095	29.5695	29.2379	29.5922	0.0737345	0.149907	0.335785	RPL9	P32969;E7ESE0;D6RAN4;H0Y9V9
23.8583	24.182	23.8296	23.8106	23.7832	23.5989	23.2548	0.0738219	0.149984	-0.374507	PPIG	C9JN15;Q13427;C9JM79;E9PG73
20.5872	21.1021	19.433	20.1887	21.2652	21.3692	21.1814	0.0739375	0.150393	0.9442	DCAKD	K7ESP4;Q8WVC6
28.0894	28.339	28.1069	28.0579	28.3158	28.3471	28.3021	0.0740277	0.150615	0.173387	PRKAR1A	P10644;K7EPB2
26.7603	26.7313	26.6535	26.3733	26.4257	26.0321	26.4144	0.0740669	0.150602	-0.338896	NUDCD1	Q96RS6
26.4616	26.0265	26.1384	26.1426	26.3497	26.5767	26.4858	0.07442	0.151224	0.278495	PRKACA	P17612
26.5149	26.3652	26.3807	26.252	26.6217	26.5982	26.4453	0.0746681	0.15139	0.176853	WASF2	Q9Y6W5
27.9808	27.6612	27.3387	27.3936	27.1389	27.3504	26.9526	0.0747532	0.151571	-0.44627	LNPEP	Q9UIQ6
24.7604	24.4578	24.6743	25.2491	24.2848	22.6019	24.1514	0.0750068	0.151904	-1.10602	CD22	P20273
29.4104	29.385	29.2043	29.2701	29.1134	29.2609	28.9774	0.0751712	0.1524	-0.200206	XPO1	O14980
26.8554	27.3071	27.2476	27.1345	27.3526	27.3941	27.4904	0.0753117	0.152576	0.27623	ARHGEF2	V9GYM8;Q92974
26.4251	26.5176	26.2647	26.338	25.7478	24.3804	26.0784	0.075353	0.152558	-0.984138	RPA2	P15927;Q5TEJ7
22.1239	22.5274	21.9458	22.369	23.3981	22.2771	23.3266	0.0754947	0.152789	0.759098	MFN2	O95140
25.5779	25.7619	25.6822	25.6949	25.2387	25.5025	25.609	0.0755825	0.152826	-0.229186	TTC37	Q6PGP7
22.8496	22.0468	23.7034	22.8229	23.6413	24.2164	23.6103	0.0758432	0.153094	0.966999	BIN1	O00499
23.7526	24.7145	24.2688	24.1701	24.8553	24.8028	24.6312	0.0759302	0.153275	0.536602	ABR	A0A0G2JQ41;A0A1C7CYZ0;Q12979;B7Z683
27.1114	27.3043	26.9817	27.105	26.7282	26.7774	27.0717	0.0760598	0.153599	-0.266496	NDUFA13	Q9P0J0;B4DEZ3;K7EJE1;E7ENQ6;U3KQP3
23.3357	22.7882	22.7269	22.1847	23.2281	23.6902	23.3713	0.0761758	0.153673	0.671022	CLPX	O76031
25.4167	25.5439	25.7591	25.5082	24.9444	25.4376	25.29	0.0762231	0.153663	-0.333002	PREX1	Q8TCU6
27.044	26.8257	26.7576	26.7402	26.4942	26.7452	26.601	0.0766107	0.15426	-0.228396	GPD2	P43304
23.1983	23.0161	22.4065	23.3652	22.6905	21.357	22.2093	0.0766843	0.154299	-0.910938	RANBP9	Q96S59
27.5373	27.8373	27.8831	27.5771	27.3777	27.5126	27.499	0.0768423	0.154513	-0.24562	UBR4	Q5T4S7
26.9762	26.0142	25.9569	26.269	25.4989	25.2965	25.966	0.0770279	0.154692	-0.716979	MEMO1	Q9Y316
23.7649	26.0109	24.9047	25.2325	24.4098	22.3493	23.2193	0.0771633	0.154784	-1.65211	PPP1R14B	Q96C90
27.3833	27.2086	26.7307	27.0992	26.7939	26.7098	26.7156	0.0772073	0.154831	-0.365694	BPNT1	O95861;A6NF51
29.4962	29.3492	29.0522	28.8161	28.5851	26.9369	28.6608	0.0773175	0.154892	-1.11746	C1QBP	Q07021;I3L3Q7;I3L3B0
30.7385	30.4248	30.2279	30.3587	30.7892	31.2745	30.6258	0.0777816	0.155757	0.458982	RPS4X	P62701
24.6104	25.4892	25.3853	26.0442	24.5159	23.2034	24.827	0.0782153	0.156841	-1.20017	CCDC88A	Q3V6T2;A0A087WXD9
27.5283	27.5165	27.426	27.3841	27.1985	27.4352	27.2863	0.0782198	0.15676	-0.157075	NUP93	Q8N1F7;H3BVG0
26.2971	26.2352	25.7595	25.9739	25.425	25.886	25.6711	0.0788588	0.158164	-0.405706	MRPL37	Q9BZE1;S4R369;A6NHR2
29.1816	28.5486	28.0225	28.489	29.6491	30.9734	28.8964	0.0788652	0.158051	1.27918	RPL13	P26373;J3QSB4
19.5241	20.8018	19.2111	19.4541	21.7362	20.3511	20.7581	0.0789161	0.158087	1.20069	MTMR9	Q96QG7
23.3443	23.7424	24.9138	23.7799	22.3134	23.5754	22.5489	0.0789408	0.158003	-1.13252	SIPA1L1	O43166;F5GYF8
27.2519	27.3912	27.1105	27.272	26.9556	25.8214	26.9018	0.0789534	0.157919	-0.696767	SRSF10;FUSIP1	Q5JRI1;O75494;Q6IQ42
27.859	27.6444	27.7626	27.9627	27.5926	25.9608	27.1326	0.0789877	0.157866	-0.911854	PDCD4	Q53EL6
31.7387	31.7469	31.6533	31.3183	31.3319	30.5454	31.3242	0.0791751	0.158246	-0.547122	HNRNPK	P61978
28.0897	27.5113	27.5951	27.0933	27.1561	25.9618	26.9918	0.0792355	0.158222	-0.869119	PEA15	Q15121;B1AKZ5
22.6179	23.1165	22.7399	22.9056	23.3688	22.9344	23.6085	0.0792422	0.158138	0.458934	IKBIP	Q70UQ0
31.4012	31.0651	31.7643	31.1406	30.8677	30.8348	31.0436	0.0793572	0.158304	-0.427425	TAGLN2	P37802;X6RJP6
25.1208	25.9593	25.4991	25.2448	25.0048	23.8811	24.9802	0.0794571	0.158498	-0.834	ASMTL	O95671
30.5016	30.2686	30.1643	29.9911	29.9602	29.7695	30.0291	0.0794878	0.158456	-0.311838	KPNB1	Q14974;J3KTM9
23.0925	22.9466	22.6419	22.592	22.5167	22.5761	22.3558	0.0795314	0.158361	-0.335374	CUTC	Q9NTM9;Q5TCZ7;A0A0B4J226
25.2774	25.6977	25.6529	25.605	25.1612	25.4433	24.7904	0.0796417	0.158498	-0.426578	ACACA	Q13085;Q59FY4
20.8896	21.0902	20.4892	20.5109	21.412	21.3334	20.9158	0.0796865	0.158479	0.475435	C12orf57	F5GXW5;Q99622;U3KQ85;U3KQ07
28.0276	27.5835	27.6509	27.4313	27.3983	27.2814	27.3363	0.0797459	0.158466	-0.334623	EIF3F	O00303
22.7577	23.1117	22.6262	22.5266	22.3473	22.5715	22.0303	0.0798354	0.158524	-0.439183	TTC39C	Q8N584;G3V1P2
23.7591	24.7464	24.568	24.6313	24.9756	24.9011	25.2469	0.0801038	0.158925	0.615013	ARHGAP18	Q8N392
21.5939	20.9211	21.4676	19.7144	21.777	22.5642	22.0045	0.0801259	0.158875	1.19101	WDR41	H0YAI6;D6RA22;D6RB94;B4DK73;B4DHS8;D6RE66;Q9HAD4;D6RIX6;D6R9M1;D6RH33;D6R9E7;D6RBY6;H0YAA3
29.0438	29.1017	28.8958	28.9133	28.8035	28.8684	28.8826	0.080225	0.159008	-0.137171	FARSB	Q9NSD9
24.2071	24.4813	24.1383	24.743	23.9426	24.1758	23.8733	0.0804286	0.159516	-0.395179	FAM175B	Q15018
25.3379	25.8694	26.1607	25.938	26.301	26.3894	26.1818	0.0804378	0.159446	0.464222	RRP12	Q5JTH9
26.6034	26.0174	26.0091	26.5136	26.13	25.6113	25.2162	0.0807938	0.160076	-0.633365	BCAS2	O75934
23.7702	23.7092	23.9399	23.3729	24.0334	24.0674	23.9384	0.0808036	0.159963	0.315022	PLEKHO2	Q8TD55
26.8515	26.4999	26.3781	26.401	26.7742	27.3093	26.795	0.0808061	0.159862	0.426854	DCTN2	Q13561;F8W1I6;F8VW18;F8VRV7;H0YI98
22.7438	21.0046	22.9485	20.7177	20.3433	19.4765	20.792	0.0808463	0.159868	-1.64972	ADRM1	Q16186
25.5614	24.9238	24.8299	25.8276	24.6607	24.7875	24.4543	0.0810188	0.16016	-0.651506	WDFY1	Q8IWB7;C9JJ54
27.9801	27.0636	26.4349	27.75	28.5579	28.2574	27.9689	0.081136	0.160297	0.954239	RPL36AL	Q969Q0
22.7584	22.8626	21.9996	22.884	19.9608	20.7439	22.5992	0.0814091	0.161108	-1.52483	PPP2R2D	Q66LE6
27.7706	27.5591	27.7514	27.8572	27.4741	27.5283	27.6439	0.081458	0.161041	-0.185799	EHD4	Q9H223
24.8972	23.6197	25.2257	24.9193	23.7657	23.3823	23.9478	0.0815106	0.161132	-0.966877	C1orf123	Q9NWV4
29.3339	29.4459	29.5511	29.2519	29.3271	29.0989	29.1188	0.0816424	0.161313	-0.214151	TPM4	P67936;K7ENT6
23.9938	24.4836	24.1568	24.2631	24.3503	24.6016	24.685	0.0817094	0.161449	0.321277	CCDC86	Q9H6F5
20.4894	21.2105	20.7129	21.1945	21.301	21.4287	21.3747	0.0819205	0.161986	0.466313	DUS2	J3QLD5;E7EUN9;Q9NX74;H3BRI6;H3BSF3;I3L0K0;H3BMK6;H3BTR3;I3L1K5;H3BQX4;H3BM64;I3L4H0;I3L4Y9
26.0572	26.0779	26.1748	26.0531	25.4548	24.9193	26.071	0.0819384	0.161873	-0.60909	LSM14A	Q8ND56;A0A140TA76;K7EMZ9
22.7102	22.2436	23.2426	22.5944	22.2096	21.6261	22.294	0.0819914	0.161969	-0.654459	DDX3Y	O15523
23.5036	24.3737	24.5756	24.6709	23.6941	23.5811	23.4948	0.0825001	0.163012	-0.690917	TP53BP1	A6NNK5;Q12888
25.3368	25.939	25.804	25.7932	25.3461	25.3236	25.4526	0.0827218	0.163377	-0.344149	MTA1	Q13330;E7ESY4;H0Y4T7
21.0008	21.1049	21.7935	21.3075	21.9106	21.8142	21.6129	0.0827229	0.163263	0.477562	FAM96A	H0YKV4;Q9H5X1
22.401	23.109	24.2249	23.3744	22.3736	22.3898	22.1446	0.0829205	0.163697	-0.974658	PDXP	Q96GD0
26.2485	26.3697	26.1665	25.9163	26.4936	26.8196	26.308	0.082946	0.163606	0.365159	RAB3GAP1	Q15042
25.2835	25.6279	25.4051	25.4499	25.0923	25.3664	24.7381	0.0831304	0.163786	-0.376009	HN1L	A6NGP5;Q9H910;H3BU16;H3BMV3;H3BMT0;H3BTV5
24.7214	22.5589	23.3465	24.2493	22.7494	21.8205	22.5904	0.0833124	0.164261	-1.33223	ARGLU1	Q9NWB6
28.8273	29.1806	29.477	29.4586	29.6608	29.5621	29.6613	0.0838504	0.165305	0.392221	RPS5	M0R0F0;M0R0R2;P46782;M0QZN2
21.2376	22.3864	21.2857	21.3883	20.6749	21.078	20.7895	0.083895	0.16537	-0.727	HAUS3	Q68CZ6
23.0221	24.1309	24.0406	24.1528	23.3884	22.41	23.1043	0.0840542	0.165638	-0.869057	PIP4K2B	P78356
25.0303	25.1066	24.9452	24.8516	25.1911	25.1137	25.0943	0.0841042	0.165639	0.149623	PDK1	Q15118
26.2145	26.3429	26.5006	26.1931	26.2494	25.8532	25.3902	0.0841232	0.165602	-0.481834	TRIM56	Q9BRZ2;C9JI91
23.3991	24.2153	23.5298	25.2918	24.9106	25.2779	25.6263	0.0842224	0.165825	1.16261	STT3B	Q8TCJ2
21.2098	21.7404	21.1807	21.2569	21.7865	21.5364	22.3174	0.0843219	0.165801	0.533153	PREPL	Q4J6C6
23.4002	23.5109	23.0672	23.7324	22.8555	23.239	22.9661	0.0844737	0.166095	-0.407436	DHFR	P00374;B4DM58
28.3612	28.2301	28.151	28.1065	27.9286	28.1761	27.7946	0.0846156	0.166355	-0.245772	GSPT1	H3BR35;P15170
25.2931	25.7867	25.6426	25.269	25.0494	25.2332	24.1288	0.0849945	0.167405	-0.69405	YTHDF2	Q9Y5A9
28.6427	28.9489	28.9954	28.9193	28.9835	29.1922	29.1489	0.0850152	0.167362	0.231628	SF3B1	O75533
24.8687	24.3403	24.1553	23.9014	23.8007	22.961	23.9302	0.0850734	0.167464	-0.752478	NCAPG	Q9BPX3
24.5239	24.7373	25.1855	24.9097	24.628	24.2938	24.4091	0.0851583	0.16753	-0.39549	PPIL1	Q9Y3C6
23.9394	24.1006	24.4873	24.7596	23.5453	23.4694	24.1386	0.0853261	0.167706	-0.603975	TK1	P04183
26.6068	25.4088	25.9912	26.6911	26.8498	27.5267	26.7613	0.0855564	0.168181	0.871465	CTSH	A0A087X0D5;P09668
23.8263	22.4539	21.6979	22.5754	24.1142	23.4099	23.9195	0.0857179	0.168387	1.17615	RBX1	P62877
19.7634	20.4824	19.7968	19.455	21.0885	19.9864	21.181	0.0857782	0.168474	0.877601	HLA-C	Q29865
28.0611	27.8794	27.9019	27.8598	28.1243	28.2272	27.9639	0.085789	0.168413	0.17957	HARS	P12081;B4DDD8;B3KWE1;E7ETE2;B4E1C5
26.1716	26.0842	25.9926	26.0633	26.0881	26.5865	26.3833	0.0858991	0.168517	0.274706	AP3M1	Q9Y2T2
21.3623	21.8867	21.8597	21.0068	21.996	22.9126	21.9799	0.0859505	0.168506	0.767298	SH3BGR	H7C2G0;P55822
24.408	24.4537	24.9315	25.1646	25.1315	25.742	25.1224	0.0860683	0.16853	0.592485	SACM1L	Q9NTJ5;E9PGZ4;F8WDN7
29.6178	29.7819	29.6628	29.6723	29.8143	30.4698	29.8997	0.0860803	0.168415	0.377542	RPS15A	P62244;I3L3P7;I3L246
25.7106	25.6626	25.4407	25.2646	25.3221	25.276	24.8967	0.0861413	0.168559	-0.354697	AIM1	A0A0J9YWL0;Q9Y4K1
26.7983	27.0081	26.8648	27.085	26.7303	26.8303	26.3936	0.0861792	0.168551	-0.287671	VPS13C	Q709C8
24.7982	24.6481	24.2998	24.6334	24.7058	25.5647	25.0658	0.0862615	0.168515	0.517237	CTSD	A0A1B0GW44;A0A1B0GV23;A0A1B0GVD5;A0A1B0GWE8;P07339;A0A1B0GVP3;A0A1B0GU92;A0A1B0GU03;H7C469;H7C1V0;F8W787;F8WD96;C9JH19
30.4201	30.1448	30.2979	30.2752	30.1367	30.1296	30.1583	0.0864967	0.168912	-0.14292	CCT4	P50991
26.571	26.9332	26.8231	27.1052	26.6964	26.4251	26.5034	0.0865083	0.168811	-0.316438	GNAI3	P08754
21.3852	22.7083	22.4061	22.8037	23.5023	24.6052	22.7028	0.0866652	0.169012	1.27762	RAB1A	P62820;E7END7
24.7127	25.7981	24.9492	25.5392	24.9676	23.6424	24.3495	0.0870287	0.169701	-0.929945	PCM1	A6NNN6;E7ETA6;Q15154;E5RGQ4;E9PGW9;E7EV93
28.824	28.2725	27.3815	28.3238	29.1118	29.4789	28.6266	0.0871267	0.169757	0.871998	RPL18A	Q02543;M0R117;M0R3D6;M0R1A7;M0R0P7
24.8606	25.2518	24.9148	24.8419	24.4195	24.8365	24.6748	0.0871476	0.169669	-0.323702	PPIL3	H7BZ14;Q9H2H8;B8ZZ77;C9K058
22.2695	22.8905	22.2836	22.3974	23.1404	23.0196	22.6127	0.0872085	0.169749	0.463978	ARMC10	Q8N2F6;A0A0J9YWR7;H7C2M7;A0A0J9YXE4;C9J5N7
28.5157	28.2748	28.2282	28.1214	28.0769	28.1321	27.9688	0.0874121	0.170041	-0.225751	CARM1	Q86X55;K7EQA8
27.0264	27.5341	27.2928	27.11	26.613	27.1552	26.739	0.0874467	0.170037	-0.405078	HTT	P42858
31.147	30.8761	31.0673	30.9132	30.6887	30.9528	30.6915	0.0875312	0.170184	-0.22325	CCT5	P48643;E7ENZ3;B7ZAR1;E9PCA1
21.3176	21.8903	21.4364	21.627	21.5714	20.5466	20.508	0.087539	0.170074	-0.692475	VRK3	Q8IV63;M0R073;M0QYA8
29.1424	28.4934	28.3427	28.8541	27.8229	28.5913	27.7034	0.0875696	0.170038	-0.66895	MS4A1	E9PKH8;P11836
24.7838	25.5555	25.9153	25.9763	26.3801	26.4639	26.0171	0.0875758	0.170007	0.729283	BST2	Q10589
22.3682	21.6567	21.7148	22.0059	21.3342	21.4309	21.6927	0.0876463	0.170081	-0.450449	WDR7	Q9Y4E6;A2RRE0
20.5243	22.5173	21.3969	22.1813	20.8073	19.7933	20.6341	0.0877304	0.170109	-1.24335	GPCPD1	Q9NPB8;H0Y565
26.3268	26.1988	26.2494	26.5082	26.2136	25.8916	26.1336	0.0879264	0.170396	-0.241193	SGTA	O43765
31.9571	31.932	32.0123	31.9374	31.7603	31.9307	31.8848	0.0879704	0.170381	-0.10112	HNRNPU	Q00839;A0A1X7SBS1;A0A1W2PPS1;A0A1W2PP35;Q5RI18;A0A1W2PPL4;A0A1W2PPH7;A0A1W2PQL0;A0A1W2PP34;A0A1W2PQ74;A0A1W2PRZ7;A0A1W2PQD4
24.8018	23.6906	24.1984	24.5006	23.8727	23.4741	23.6655	0.0879948	0.170307	-0.627114	WDR26	Q9H7D7;H0Y9R3
27.0039	27.2167	27.0218	27.122	27.5371	27.3753	27.1135	0.087996	0.170192	0.250863	MTCH2	Q9Y6C9
27.5683	27.1935	27.1451	26.9371	26.7609	26.9553	26.8848	0.0880408	0.170156	-0.34398	TMPO	P42166
22.5784	22.8119	22.4879	22.3208	21.888	22.4884	22.0496	0.0881752	0.170334	-0.407749	EXOC5	F8W9B8;O00471;A0A0A0MSI8
23.973	24.3349	24.1605	23.3337	23.5852	23.4	22.7705	0.088353	0.170583	-0.698609	UVRAG	Q9P2Y5;E9PR71
26.889	26.1215	26.1566	26.2077	25.9333	25.5837	25.9889	0.0884054	0.1706	-0.508412	WDR77	Q9BQA1;H0Y711
26.448	26.0739	25.7802	25.9966	25.8052	25.676	25.6762	0.0886059	0.171005	-0.355539	PPP6R3	H7BXH2;E9PKF6;Q5H9R7;E9PQP7;H0YEN2
25.7467	26.1247	26.0292	25.6485	25.7201	25.0713	25.5414	0.088651	0.170985	-0.442997	ARAP1	Q96P48;E7EU13;A0A0A0MSJ2
25.4163	25.8258	19.6299	25.5365	21.2571	18.0067	20.6823	0.0889615	0.171497	-4.12008	HLA-DRB1	Q9TQE0;P13761;A0A140T958
27.0169	26.395	26.3979	26.578	25.9575	24.5406	26.2717	0.0889771	0.171403	-1.00703	PAFAH1B2	P68402;J3KNE3
27.4348	27.6724	27.6389	27.756	27.8217	27.7741	27.7948	0.0894247	0.172219	0.171346	NAT10	Q9H0A0;A0A087WV29
28.3612	28.4895	28.1488	28.161	28.0953	28.0913	28.0671	0.089433	0.172136	-0.205536	PML	P29590;H3BT57;H3BT29;H3BUJ5
27.2983	26.7343	27.002	26.8339	26.7823	26.4916	26.6039	0.0895428	0.172222	-0.341205	AKR7A2	O43488;H3BLU7
25.304	26.2189	25.8949	25.4509	24.9664	24.9013	25.4637	0.089555	0.172139	-0.606708	PITHD1	Q9GZP4
25.7242	25.8573	25.9957	25.57	25.5056	24.8177	25.5856	0.0899955	0.173013	-0.483845	NDUFAF2	Q8N183
22.0482	21.2927	21.5942	22.1459	22.146	22.3613	22.3301	0.0900166	0.173018	0.508899	MLYCD	O95822
27.0958	28.7589	28.8791	28.5526	26.4571	27.6891	27.2041	0.0900413	0.173076	-1.20486	SPATS2L	B8ZZZ7;Q9NUQ6;F8W6C2
22.0579	23.3138	23.8231	22.2617	22.0368	21.0153	21.9585	0.0902012	0.173389	-1.19395	GNB1L	Q9BYB4;C9JPQ6
26.5999	26.8217	26.9837	26.9278	26.3802	26.3566	26.7903	0.0902108	0.173274	-0.324241	RASAL3	Q86YV0
23.7976	24.7682	24.9503	24.1686	24.0609	22.8603	23.6332	0.0904141	0.173565	-0.903003	DDX47	Q9H0S4
25.1791	25.1823	24.7585	25.4287	25.3387	25.5733	25.639	0.0904376	0.17345	0.379822	BMS1	Q14692
23.0402	23.0358	22.3634	22.9428	22.3257	22.642	22.1324	0.0904955	0.173431	-0.478822	PPP4R1	Q8TF05
29.0868	28.9686	28.951	28.7162	28.6092	28.869	28.5051	0.0907833	0.173841	-0.269594	HNRNPAB	D6R9P3;D6RD18;D6RBZ0;Q99729
26.4216	26.2354	26.4982	26.3861	26.7087	26.4024	26.7573	0.0907977	0.173726	0.237492	NDUFA9	Q16795
26.8158	26.9313	27.0126	26.5197	27.2264	26.9212	27.3644	0.091436	0.175155	0.350774	BCAT2	B3KSI3;O15382;M0QXF9;M0QZ10;M0QZP4
25.5094	25.2054	24.869	25.1143	25.4853	25.6195	25.4378	0.0916548	0.175659	0.339696	PRKAG1	F8VYY9;P54619
29.3948	29.3885	29.2337	29.3501	29.2441	28.8207	29.2041	0.0921509	0.176511	-0.252133	DDX1	Q92499;F1T0B3;A0A087X2G1
22.9636	23.2659	23.1467	23.2091	22.7512	23.1132	22.8218	0.0925703	0.177219	-0.250929	MEF2C;MEF2A;MEF2D	A0A1B0GTW4;D6RG21;D6RCM6;D6RJA7;D6RJG6;A0A0R4J2G5;A0A1B0GV32;Q06413;H0YKY6;H0YM62;D6RG14;D6RB91;Q05BX2;A0A0D9SET2;D6R942;D6RC63;D8L7E9;A0A0D9SFD0;A0A0D9SGI5;Q02078
23.9813	22.3802	23.1015	23.3512	23.9052	25.9376	23.9927	0.0928763	0.177852	1.40826	CYB5B	J3QR91;D6RFH4;H3BUX2;J3KNF8;O43169
23.7968	23.4548	24.1157	23.4761	24.3178	23.9032	24.2345	0.0929432	0.177861	0.441051	DCP1A	Q9NPI6;A0A087WT55
21.6886	21.7256	21.5199	21.8889	21.8295	22.7009	22.0549	0.0929833	0.177902	0.489329	METTL2A;METTL2B	Q96IZ6;A0A087WW35;Q6P1Q9
22.6145	23.4977	22.7835	22.8812	22.2408	21.8774	22.7649	0.0929846	0.177785	-0.649839	SMC6	Q96SB8;C9JMN1
31.2306	30.5547	30.6428	30.5718	30.2398	30.1328	30.5358	0.09306	0.177808	-0.447177	RPSA	C9J9K3;A0A0C4DG17;P08865
25.9723	26.3561	25.9734	25.8313	25.7962	25.5825	25.8094	0.0932197	0.17803	-0.303926	GEMIN5	Q8TEQ6
27.1156	27.0919	26.9171	26.7709	26.6971	26.7269	26.8535	0.0932955	0.1782	-0.214715	DLAT	P10515;H0YDD4;E9PEJ4
22.9154	23.5593	22.6992	22.8625	21.5284	22.258	22.8356	0.093354	0.17818	-0.801788	RABEPK	Q7Z6M1;Q5T1S4;Q5T1S5
22.3867	23.2738	22.7051	22.5281	21.9267	22.4255	22.2054	0.0936066	0.178541	-0.537567	MLH1	P40692;H0Y818
22.9664	23.8782	23.0614	22.652	21.2841	22.1729	22.8864	0.0936094	0.178448	-1.02504	KDM3A	F5H070;Q9Y4C1
27.5833	27.1712	26.8595	26.7252	28.062	27.2257	27.8906	0.0937862	0.178837	0.641294	SEC13	A8MXL6;P55735
29.6309	29.9431	29.793	29.6296	29.5343	29.3425	29.65	0.0939011	0.179006	-0.24022	MATR3	A0A0R4J2E8;A8MXP9;P43243;D6REM6;D6R991
24.2644	23.1687	23.4763	23.4492	24.2113	24.0674	24.2361	0.0940138	0.179311	0.581927	IRF3	Q14653;M0QYT9;M0R205;M0QZB8;M0QZB7;M0R3C2
24.975	24.9443	24.9974	24.6486	25.0564	25.4823	25.0725	0.094054	0.179212	0.31239	TIMM9	Q9Y5J7;A0A1W2PRH9;A0A1W2PQS5;G3V502;G3V2F3
22.9809	22.6818	21.8897	22.4649	23.1375	25.0843	23.0889	0.0941478	0.179257	1.2659	MAP3K5	Q99683
26.4959	26.1893	26.1505	25.899	26.5928	26.8869	26.3121	0.0942264	0.179356	0.41359	AP2B1	P63010;A0A087X253;A0A087WU93;A0A087WZQ6;A0A087WYD1
26.7161	26.3347	26.4198	26.2189	25.4506	26.4672	25.3095	0.0943687	0.179571	-0.679921	PFDN5	Q99471;H3BPF6;H3BMQ1
24.7086	25.3245	25.2743	25.1439	25.4911	25.7478	25.3132	0.0945103	0.179872	0.404505	TMA16	H0Y9X1;Q96EY4;D6RA57;D6RE67;D6RC31
22.9997	23.3849	22.3645	24.649	21.8633	22.6788	21.6185	0.0946593	0.180055	-1.29601	EIF2AK4	H0YME5;Q9P2K8
21.5531	22.4832	22.1822	22.2492	22.4442	22.5893	23.2211	0.0946816	0.179997	0.63459	RIOK2	Q9BVS4;H0Y919
26.3865	26.5521	26.2365	26.0275	26.0258	25.1114	26.0066	0.0947253	0.179922	-0.586041	COPS6	E7EM64;Q7L5N1
25.956	26.0738	26.1566	26.1463	26.0962	26.3374	26.4021	0.095267	0.181303	0.195371	FAM120A	Q9NZB2
24.9295	25.3311	24.9149	25.3023	24.6062	24.8967	24.89	0.0955808	0.181958	-0.321815	PPP1CC	F8VYE8;P36873;F8VR82;F8W0W8;A0A087WYY5
24.7398	25.3342	24.8048	24.539	24.5621	24.4162	23.567	0.0956488	0.182027	-0.672646	CUL4B	K4DI93;Q13620
30.8223	30.5716	31.034	30.5595	31.0282	31.1309	30.9489	0.0956907	0.181966	0.28916	ANXA5	P08758;D6RBL5;E9PHT9
30.8585	31.0311	30.8278	30.8055	31.0437	31.1208	30.9385	0.0961586	0.183192	0.153629	HSPA9	P38646
25.4614	25.1766	25.2964	25.4395	25.4772	25.6268	25.4746	0.0962021	0.183166	0.182691	HDDC2	Q7Z4H3
32.1276	31.9164	31.7062	31.9956	31.7729	31.5208	31.7531	0.0965774	0.183655	-0.254163	PSME1	Q06323
22.3327	21.4854	21.7846	21.7237	22.3086	22.1585	22.3615	0.0968234	0.184163	0.444595	GK2	Q14410
22.9899	23.0145	22.2409	22.4754	23.1483	23.0398	23.2932	0.0968376	0.184124	0.480264	TSSC4	C9JJV1;Q9Y5U2;A6NCC9;E9PME3;C9JHT9
29.8723	29.9195	29.6552	29.4012	29.9784	30.0008	30.016	0.0972102	0.184749	0.286332	COPB2	P35606
24.4945	24.4672	24.6985	24.203	24.3066	23.0978	23.9999	0.0975	0.185336	-0.664384	GRAP	A8MW78;Q13588
26.6238	26.5547	26.7938	26.812	26.4279	25.8997	26.5966	0.0978847	0.186204	-0.38801	VBP1	P61758;B4DWR3
26.0503	26.5231	26.8647	26.225	26.7301	27.1533	26.8116	0.0979581	0.186218	0.482613	VAMP8	Q9BV40;C9JXZ5;B8ZZT4
22.1227	22.1988	22.7083	22.632	22.9192	22.6679	22.7921	0.0982029	0.186525	0.377639	INTS2	J3KMZ7;Q9H0H0;J3KRH0
26.5378	26.7414	26.6338	26.4918	26.4356	26.3085	26.5376	0.0983263	0.186652	-0.173963	CCS	J3KNF4;O14618;E9PP76
22.9954	22.0691	22.3316	22.7753	22.7651	23.2082	23.5893	0.0986605	0.187342	0.64469	ERCC2	A8MX75;P18074;K7EIT8;E7EVE9
26.271	26.4088	26.62	26.5098	26.5932	27.0057	26.6206	0.0986803	0.187244	0.287427	KTN1	Q86UP2
28.746	28.5058	28.6217	28.0758	28.1893	27.7993	28.2203	0.0987904	0.187546	-0.417663	COX6B1	P14854
23.2137	22.5459	22.9163	22.8596	23.2778	23.5326	23.0509	0.0990788	0.18801	0.403221	PLBD2	Q8NHP8
25.8228	25.8356	25.6751	25.5319	24.7219	25.7206	25.1532	0.0993699	0.18861	-0.51777	HDGFRP2	Q7Z4V5;M0R0J3
22.9897	24.6727	24.3378	26.5875	23.2128	22.8464	22.4426	0.0993792	0.18852	-1.813	LSM12	Q3MHD2;K7ELG9
25.2085	26.5265	26.2833	26.8851	27.537	26.8885	27.0243	0.0995981	0.188882	0.924116	PTPN12	H0YC15;Q05209
22.1019	22.5433	22.3241	22.6856	23.7065	22.4261	23.2055	0.0996397	0.188838	0.699006	DERL1	E5RGY0;B4E1G1;Q9BUN8
23.8579	23.594	23.6118	23.4488	23.7083	23.9128	24.1483	0.0997625	0.188878	0.29497	MON2	Q7Z3U7
28.9325	28.683	28.4285	28.3846	28.8456	29.0412	28.8907	0.0997643	0.188757	0.318714	ERAP1	Q9NZ08
26.6505	26.7694	26.41	25.97	26.0046	25.4487	26.1981	0.100043	0.189236	-0.566182	TIAL1	Q01085;E7ETJ9;E7ETC0
24.4753	24.7295	24.6173	24.4613	24.4899	23.9163	24.3303	0.100144	0.189312	-0.325347	ASUN	Q9NVM9
29.771	30.0139	30.0447	29.9883	30.1719	30.6377	30.0562	0.10016	0.189191	0.334149	RPS19	P39019;A0A075B6E2
24.5149	24.6228	24.4287	24.5225	24.3639	23.7123	24.36	0.100197	0.189121	-0.376855	HSPA14	Q0VDF9
22.2235	22.7491	22.775	22.4175	23.2874	22.5799	23.2731	0.100383	0.189309	0.50558	EPS8	Q12929
22.772	23.3483	23.3597	22.0608	21.2409	21.4841	22.7319	0.100633	0.189674	-1.06626	SNX29	Q8TEQ0
22.5827	23.0359	24.4418	23.3502	24.3271	24.418	24.16	0.100834	0.19001	0.949049	KIF13B	Q9NQT8;E7ERX9
23.7738	24.26	23.5139	24.0213	24.5229	25.5075	24.0705	0.100983	0.190234	0.808044	USMG5	Q96IX5
24.7481	25.3137	25.0008	25.0899	24.3958	24.2563	25.018	0.100997	0.190112	-0.481425	EXOSC10	Q01780
26.087	26.2757	26.278	25.5177	26.6694	26.2264	26.7332	0.101114	0.190141	0.503395	BAG2	O95816
24.419	23.59	23.9626	23.803	24.2814	24.4191	24.401	0.10127	0.190176	0.423502	BABAM1	Q9NWV8;M0R3F4;M0R2A4;M0R2K3;M0R193;M0R0I0;M0R2I2;M0QYV1;J3KQS6
26.5965	27.039	27.1462	26.8034	27.1495	27.2567	27.1725	0.101382	0.190136	0.296611	IQGAP2	Q13576;F5H7S7;E7EWC2;D6R939
24.3806	23.669	23.3047	25.3158	23.6482	22.0432	22.8896	0.1014	0.190099	-1.30719	TFCP2	Q12800;F8VWL0;F8VX55
25.6777	26.0407	25.4388	25.6469	25.2487	25.242	25.57	0.10155	0.190299	-0.34743	USP48	Q86UV5
29.8658	28.2835	27.272	28.1888	30.0275	31.8575	29.0025	0.101618	0.190297	1.89331	HIST1H1C;HIST1H1D	P16403;P16402
26.9352	26.9615	27.0354	26.7623	26.6621	26.8737	26.7145	0.101717	0.190443	-0.173479	OXSR1	O95747;C9JIG9
30.2105	29.11	28.372	29.3264	30.3528	30.8049	29.7225	0.101824	0.190558	1.03869	RPS8	P62241;Q5JR95
22.7444	23.8565	23.2706	23.1606	23.8448	24.3635	23.5699	0.101967	0.190737	0.668048	MORF4L1	H0YLJ3;B3KTM8;H0YMJ0;Q9UBU8;H0YNE0
26.7646	26.8311	26.4254	26.2115	26.9307	26.7551	27.3215	0.101977	0.190616	0.444273	UBE2D3;UBE2D2	D6RAH7;H9KV45;A0A087WY85;P61077;D6RAW0;D6RFM0;A0A0A0MQU3;P62837
27.7319	26.8264	26.24	27.6861	28.0906	28.7076	27.5904	0.102093	0.190731	1.00844	RPL28	H0YKD8;P46779;H0YMF4;H0YLP6
22.48	23.5619	22.8272	22.8923	22.2135	22.1203	22.6706	0.102098	0.19061	-0.605567	ATG5	Q9H1Y0;A0A1B0GV54;A0A1B0GUS1
24.1171	24.372	23.6674	23.2816	22.2603	23.7106	22.8956	0.102354	0.190988	-0.904061	NDUFAF1	H0YNN4;H0YNB7;H0YL22;Q9Y375
21.7335	22.2555	21.9586	22.1879	22.3436	23.2669	22.289	0.10246	0.191204	0.59926	KIDINS220	E9PH70;A0A1W2PPB7;Q9ULH0;H0Y8E4
24.901	25.2933	24.7586	25.0294	24.8372	24.6699	24.6024	0.102539	0.191267	-0.292446	CAST	A0A0C4DGB5;E7ES10;E7EVY3;B7Z574;P20810;E9PDE4;H0Y7F0;H0Y9H6;E7EQ12;A0A0A0MR45;E7EQA0;H0YD33
27.2313	27.4031	27.2861	26.8407	27.0026	26.0793	26.8286	0.102582	0.191247	-0.553495	IDH3G	P51553;E7EQB8;E9PF84;G5E9Q7
28.5469	28.7157	28.7039	28.6832	28.9543	29.3325	28.6828	0.102808	0.191904	0.327435	RPL38	P63173;J3KT73;J3QL01;J3KSP2
24.7727	25.3736	23.5495	23.9907	22.2832	23.8044	23.4877	0.102868	0.191965	-1.22985	CREBBP	Q92793;I3L466
27.0098	26.549	26.9684	26.8392	27.0829	27.1144	27.0666	0.103019	0.192222	0.246382	PSMD7	P51665;H3BNT7;H3BTM8
23.1491	23.0871	22.9797	21.9663	21.7365	22.4096	22.0443	0.103097	0.19235	-0.732096	CLP1	E9PL17;Q92989
26.2518	26.7727	25.5233	25.4463	24.8624	25.3304	25.4145	0.103203	0.192587	-0.796067	DAP3	P51398;V9GYL9;V9GZ61;V9GYA7;V9GZ03;V9GYJ9
28.0549	28.0613	27.7648	27.9712	27.6143	27.8711	27.7863	0.103292	0.192674	-0.205797	PNPT1	Q8TCS8
24.213	24.2598	24.359	24.3659	24.2601	25.856	25.0953	0.103717	0.193242	0.771054	WIBG	Q9BRP8
27.9007	27.0896	27.7086	27.7477	27.919	28.7454	27.9933	0.103736	0.193163	0.607594	RPL22L1	C9JYQ9;H0Y8C2;Q6P5R6
22.6857	22.5865	22.7293	22.6912	21.774	22.764	21.9428	0.103895	0.193363	-0.51289	TMX4	Q9H1E5
22.8021	23.9414	23.1749	23.5516	22.4367	22.4715	23.1334	0.104105	0.193601	-0.687019	PARP2	G3V167;Q9UGN5;H0YH02
22.0322	23.602	24.0469	23.8651	22.6956	22.1171	19.5609	0.104223	0.19374	-1.92867	TRMT1	Q9NXH9
29.0258	29.7098	29.5908	29.462	28.8689	28.6063	29.3539	0.104492	0.194145	-0.504043	SET;SETSIP	A0A0C4DFV9;Q01105;A0A087X027;P0DME0
31.0129	31.0099	30.7654	30.6083	30.5791	30.5883	30.6693	0.104499	0.194024	-0.236878	SHMT2	P34897;H0YIZ0
25.7078	25.3188	25.8328	25.3182	25.8962	25.8373	25.8388	0.104517	0.193902	0.31306	FAH	P16930
23.037	22.9235	22.5823	22.884	22.4289	22.816	22.2623	0.104559	0.194001	-0.354299	HAX1	O00165
27.2284	27.3332	27.7757	27.4076	27.6899	27.7771	27.6902	0.104582	0.19388	0.28283	SQRDL	Q9Y6N5;H3BNX3
28.1805	28.0528	27.8743	28.0473	27.8059	27.9957	27.6762	0.104644	0.193849	-0.212792	SRM	P19623
23.9961	23.5901	23.3928	23.5414	23.3194	23.3966	23.2414	0.104753	0.193968	-0.311016	CIAO1	O76071
22.1959	22.5752	21.7782	22.2912	21.6667	22.0484	21.5134	0.104854	0.194051	-0.467285	ZC3HC1	C9J0I9;Q86WB0
29.319	29.1099	29.2187	28.9218	28.6269	28.9921	28.9708	0.104937	0.19412	-0.279092	GRB2	P62993
22.4264	22.8042	23.5142	22.4679	21.8078	22.6248	21.6888	0.105335	0.194963	-0.762734	TRPT1	F5H6B6;F5H8A0;Q86TN4;F5H1K3
26.4359	26.7976	26.7813	26.9071	26.5379	26.2443	26.5431	0.10559	0.19533	-0.288682	CSNK2A2	P19784;H3BSA1;H3BV19
24.0745	24.1785	24.0934	23.5212	23.3546	23.8364	23.4203	0.105786	0.195582	-0.429784	ADNP	Q9H2P0
24.9781	25.3574	25.6669	25.7937	26.2894	25.5068	26.8287	0.106631	0.197311	0.759293	SUN2	Q9UH99
24.193	24.4404	23.9162	24.1327	23.878	24.0422	23.5007	0.106687	0.197308	-0.363588	TFEB	B0QYS6;B0QYS7;P19484;A0A1B0GXL9;B1AKB4;B1AKB5
24.4338	23.0243	25.1043	24.5307	25.6813	25.0421	25.3096	0.106714	0.197262	1.07104	TOMM40	O96008;K7EKG4;K7EJ57
26.7651	26.232	26.3436	25.9786	26.6328	26.6733	26.8948	0.106737	0.197204	0.403833	TPP1	O14773
25.7714	25.8749	25.0535	26.3605	24.9586	25.2186	25.1939	0.106745	0.197082	-0.641366	SLC7A5;SLC7A7	Q01650;H0YJ95;A0A0C4DGL4;G3V4Z6;Q9UM01
21.8429	20.6976	20.0401	21.8663	19.5093	18.5111	20.7948	0.106763	0.19696	-1.50667	HLA-B	P30485
25.581	25.1027	25.4501	25.3454	24.9812	25.3032	24.8819	0.106962	0.197249	-0.314382	TCOF1	Q13428;J3KQ96;E7ETY2
27.6425	27.8461	27.4245	27.7048	27.1243	27.6209	27.2696	0.107066	0.197328	-0.316196	TRIM25	Q14258
29.173	28.4198	27.5807	28.5979	29.1963	29.6364	28.9786	0.107076	0.197205	0.827547	RPL17;RPL17-C18orf32	A0A087WXM6;J3QQT2;J3KRX5;A0A0A6YYL6;P18621;J3QLC8;J3KRB3;A0A087WWH0;J3QS96;A0A0A0MRF8;A0A087WY81
23.8992	23.7956	23.5909	24.3963	24.178	24.5112	24.3535	0.107167	0.19722	0.427079	RTN3	O95197
29.1772	29.326	29.1637	29.1384	29.1308	28.7269	29.0643	0.107254	0.197286	-0.227372	LMNB2	Q03252
22.5325	22.999	22.3347	22.4922	21.7493	22.2932	22.3541	0.107371	0.197524	-0.457402	SRPK2	P78362;H7C521
20.3662	23.5734	22.7347	23.8096	24.4666	24.8772	24.0977	0.107388	0.19743	1.85953	FAM3C	Q92520;C9JP35;C9JMN4
27.3136	27.5259	27.2481	27.3197	27.2447	27.1832	27.1989	0.10745	0.197382	-0.142873	PRMT5	O14744;G3V580
29.2635	29.3489	29.6554	29.3873	29.476	29.7464	29.7654	0.10749	0.197314	0.248803	HADHA	P40939
26.9012	26.6544	26.5823	26.4372	26.9515	26.9289	26.7768	0.107558	0.197422	0.241947	PROSC	O94903;E5RFX7;E5RG77
25.2767	26.3272	25.5064	25.8018	25.0033	25.4688	24.9326	0.107621	0.197369	-0.593158	GLRX5	Q86SX6
22.2042	22.7324	23.1873	22.2971	23.3222	23.1142	23.01	0.107698	0.197433	0.543555	PSME4	Q14997
24.8858	24.8367	24.3329	25.0278	23.5798	24.6045	24.3017	0.107729	0.197385	-0.608805	FCRLA	Q7L513
29.0411	28.899	28.5925	28.5538	28.3141	28.6184	28.4529	0.107743	0.197313	-0.309794	PAK2	Q13177
23.0373	22.6701	22.5055	22.7854	22.9061	23.2237	23.019	0.107897	0.197469	0.300014	YRDC	Q86U90
25.6151	26.1281	25.8961	25.1962	25.3017	25.0558	25.317	0.107972	0.197461	-0.484047	DNAJA3	Q96EY1
22.2434	21.7167	21.3938	21.818	22.3041	22.0066	23.1743	0.107973	0.19734	0.701989	PI4K2A	E9PAM4;Q9BTU6
26.7428	27.2456	26.6918	27.0207	26.4654	26.3854	26.8179	0.108012	0.197305	-0.368997	ZNF207	J3QRS9;O43670;X6R4W8;J3KS31
26.0138	26.4163	26.0639	25.8585	25.7345	25.6348	25.9551	0.108054	0.197292	-0.3133	BCCIP	Q9P287
25.1203	24.7992	24.6346	24.6444	24.0476	24.6326	24.5339	0.108188	0.197553	-0.394917	SHOC2	Q9UQ13;X6RI37
22.713	22	21.5625	22.2531	22.6442	22.5056	23.3366	0.108205	0.197432	0.696665	LANCL2	Q9NS86
29.036	28.8107	28.7778	28.7929	29.1686	28.9535	28.9783	0.10853	0.197928	0.179115	FH	P07954
25.9394	25.5158	25.472	24.9531	24.745	25.0172	22.4991	0.108606	0.19799	-1.38297	TBK1	Q9UHD2
28.1358	28.3719	28.2081	28.057	28.0367	28.0995	27.8807	0.108837	0.198294	-0.187545	ADH5	P11766
24.0226	23.8927	24.0567	23.5424	24.1568	24.0566	24.3138	0.108845	0.198198	0.29716	LARP4B	Q92615
31.2235	31.3165	31.2097	31.2792	31.0515	31.2709	30.9178	0.108976	0.198353	-0.177184	HNRNPC	G3V4W0;B4DY08;B2R5W2;G3V4C1;G3V2D6;G3V251
23.7849	22.7683	24.0958	23.1671	22.9564	22.8604	21.9571	0.108989	0.198305	-0.86275	KTI12	Q96EK9
28.2995	28.4617	27.7923	28.1268	28.5183	28.9992	28.3588	0.109028	0.19823	0.455378	BZW1	Q7L1Q6;C9IZ80
27.0122	26.9383	26.6061	26.9324	26.6906	26.5668	26.6996	0.109168	0.198397	-0.219911	RBM4;RBM4B	Q9BWF3;E9PB51;Q9BQ04;D6R9K7;J3QRR5;E9PLB0;E9PM61;U3KQD5
23.7521	23.8658	23.856	23.9604	23.6193	23.0623	23.7869	0.109762	0.199557	-0.369095	SARS2	M0QWZ7;Q9NP81;M0R2C6;M0R259
26.1273	26.3443	26.6065	26.2864	26.7347	26.3899	26.9344	0.109819	0.199723	0.345195	SRP54	P61011;G3V4F7
22.5235	22.3434	22.0271	22.0285	21.8469	22.0824	21.8277	0.109919	0.199939	-0.311646	HS1BP3	Q53T59;B5MC96;F6TR53
26.4555	26.5461	26.7115	26.5506	26.4043	26.3256	26.5145	0.109957	0.199864	-0.15117	DNAJC7	Q99615;K7EIH8;K7EPP7;K7ESP1;K7ER44
25.6406	25.8902	25.9444	25.4286	25.9538	26.0516	26.0044	0.110093	0.200044	0.277313	BRD4	O60885;M0QZD9
23.9397	24.3827	23.7763	23.1613	22.0178	23.2959	23.3732	0.110111	0.199922	-0.919328	CKS2	P33552
23.512	22.7578	22.4853	22.1982	21.5077	22.1258	22.3094	0.11018	0.199898	-0.757374	PRCC	Q92733
25.7317	25.9226	25.6514	25.356	25.4646	25.425	25.2078	0.110242	0.20007	-0.299623	ABI1	B6VEX4;A0A0A0MRT6;Q8IZP0
26.2541	26.1918	25.9812	26.3178	25.9621	26.0694	25.4002	0.110456	0.200296	-0.375671	MTHFD1L	A0A087WVM4;B7ZM99;Q6UB35
24.1281	24.7934	24.2535	25.5104	23.8313	24.0385	23.9605	0.1105	0.200329	-0.727892	ALAD	P13716
29.0542	29.2462	29.3039	29.1091	29.2945	29.4056	29.279	0.110632	0.200431	0.148036	RPS21	Q8WVC2;P63220;Q9BYK1
25.7992	24.7917	25.3599	25.4791	24.2407	24.8335	25.0993	0.11066	0.200404	-0.632992	PSPH	C9JBI3;P78330
27.2027	26.8346	25.3928	26.5387	27.2846	28.5228	27.1132	0.110734	0.200389	1.14799	RPL29	P47914
28.9362	28.7533	28.7278	28.9132	29.1714	29.1049	28.8382	0.110795	0.200406	0.205516	TUBA4A	P68366
27.6036	27.5313	27.4045	27.2345	27.9352	27.5415	27.6495	0.110962	0.200471	0.265267	SRP72	O76094
27.1032	27.2562	27.1809	27.222	26.9381	27.1932	27.0071	0.111018	0.20041	-0.144439	ISOC1	Q96CN7;D6RGE2
26.0314	25.4802	25.4131	25.4229	24.5906	25.5599	24.8833	0.111098	0.200583	-0.575643	RPIA	P49247
29.9098	29.9867	30.0589	29.8981	30.0814	30.0024	30.1028	0.111109	0.20048	0.0987938	EPRS	P07814;V9GYZ6
26.3135	26.4713	26.7729	26.7666	27.041	27.3552	26.6294	0.111298	0.200819	0.427482	MNDA	P41218
22.0837	21.7518	22.3752	22.3345	22.303	23.1095	22.5218	0.111457	0.200941	0.508507	GSTZ1	A0A0A0MR33;G3V5T0;A0A0C4DFM0;G3V4T6;O43708;G3V3B9;G3V267
23.5777	24.496	24.703	24.7171	23.5274	23.8911	23.7799	0.111483	0.200854	-0.640628	CDK13;CDK12	Q14004;Q9BVE2;A0A087X209;J3QSD7;Q9NYV4
31.0493	30.6759	30.5675	30.7723	30.5684	30.3791	30.578	0.111591	0.201005	-0.257755	HLA-DRB1	P20039
27.0623	27.0801	27.1041	26.8411	26.3281	27.0668	26.5219	0.11165	0.201132	-0.382963	IMPA1	H0YBL1;P29218;E5RIP7;E5RG13;E5RG94;E5RHE9;E5RI82;E5RGY4
25.0536	24.7633	25.7147	24.8213	24.3415	24.2659	24.8883	0.111666	0.201037	-0.589673	ATG3	Q9NT62
21.2148	20.6176	19.314	21.2977	21.9083	21.207	22.1184	0.11229	0.20203	1.13355	USP41;USP18	H7BXK0;Q3LFD5;Q9UMW8
24.8633	23.9254	24.3744	24.3066	23.5324	23.8618	24.142	0.112383	0.202046	-0.522036	FABP3	S4R371;P05413;S4R3A2
21.0497	23.0805	22.4536	22.6815	21.2116	19.7887	21.7877	0.112474	0.202075	-1.38698	MTA3	E9PCS8;E7EQY4;E7EV10;Q9BTC8;D6W5A2
26.4131	26.6197	26.3019	26.2687	26.1945	26.2132	26.2489	0.112708	0.202429	-0.181965	CSTF3	Q12996
20.9318	20.8375	20.5371	20.4767	21.2116	22.4668	20.8698	0.112804	0.202691	0.820292	PPP2R5E	Q16537
21.3135	22.4569	20.2278	23.1113	22.5833	23.6721	23.7904	0.112997	0.20283	1.57123	PCCB	E7ETT4;E7EUY3;E7ETT1;E9PDR0;C9JQS9;E7EX59;P05166;F8WBI9;E9PEC3
28.3651	28.3137	28.387	28.0442	28.1144	27.9177	28.1552	0.113017	0.202735	-0.215103	DDX39B	Q13838;Q5STU3;A0A0G2JJZ9;F6WLT2;A0A140T9X3;A0A0A0MT12;F6TRA5;A0A140T9X9;A0A140T996;F6S4E6;F6UJC5;A0A140TA18;A0A140T973;A0A140T9K1
23.2454	24.1497	22.7814	23.6016	24.1038	23.9224	25.8188	0.113186	0.202877	1.17048	ASCC1	Q8N9N2;H0YCB3;E9PR40;E9PQZ6;H0YE76
22.572	23.5693	23.1365	23.0683	22.3461	22.7678	22.6336	0.113592	0.203742	-0.504015	AMDHD2	Q9Y303;H3BTZ6;H3BSV9
25.1562	25.1396	25.3429	25.0784	25.5865	25.599	25.1541	0.114037	0.20458	0.267296	STRN	O43815
23.5423	22.9081	24.451	23.9167	24.1103	24.7309	24.6693	0.114105	0.204508	0.798934	TOMM7	Q9P0U1;B5MD00;A0A087WZY2;A6NIV2
26.1111	26.5089	26.7814	26.5669	26.7239	26.9565	26.7992	0.114433	0.205066	0.334445	ABCF2	Q9UG63;C9JHK9;C9JZV3
26.4128	26.8166	27.256	26.8561	27.08	27.9075	27.2142	0.114446	0.204958	0.565164	SMARCA4	Q9HBD4;P51532;A0A0A0MT49
20.2012	20.5523	20.3981	21.2779	20.085	20.1806	19.9269	0.114579	0.205274	-0.54322	GIT1	J3QRU8;A0A0C4DGN6;Q9Y2X7
25.4557	25.3352	24.902	24.8161	25.4964	26.0348	25.3281	0.1147	0.205223	0.492523	SCPEP1	Q9HB40
21.5734	21.6764	20.7111	21.0701	21.8106	22.1037	21.5597	0.114749	0.205222	0.566958	HPS6	Q86YV9
23.7507	22.9013	23.7769	23.4668	24.0054	24.1805	23.7415	0.114902	0.205405	0.501876	DDHD2	O94830
27.6214	27.9026	28.2746	27.4569	28.3721	28.0355	28.3526	0.115053	0.20561	0.439511	CAPG	P40121;E7ENU9;B8ZZL6
24.0999	24.4948	24.8177	24.7518	25.0983	25.622	24.6448	0.115061	0.205576	0.580664	RRP1B	Q14684
22.5238	22.9509	22.9405	24.7808	21.3932	22.6532	22.025	0.115101	0.205516	-1.27517	OSBPL11	Q9BXB4
26.4979	26.6554	26.404	26.4162	26.5342	26.8122	26.6816	0.115348	0.205959	0.182668	RANBP3	B7Z7F3;Q9H6Z4
28.3611	28.0135	27.7468	27.8934	28.5841	29.4911	28.0877	0.115557	0.206209	0.71725	RPL21	P46778;M0R181;G3V1B3
28.454	28.347	28.1982	28.0351	28.5073	28.6168	28.361	0.115645	0.206321	0.236457	ARCN1	P48444;B0YIW6
20.2007	19.8888	20.3076	20.0495	22.5588	25.0261	19.8722	0.115944	0.206724	2.37401	MKI67	P46013
27.7801	28.058	28.1187	27.6949	27.5831	27.5272	27.8145	0.115989	0.206739	-0.271348	NDUFV1	G3V0I5;P49821;B4DE93
20.9041	22.2475	24.57	23.1158	25.16	24.0156	24.3784	0.116169	0.207106	1.80863	HLA-DMB	A0A0G2JIJ2;A0A0G2JI43;P28068;F6UB75;A0A140T9U6;A0A140T9T8;A0A140T9R2;A0A140T9R0;A0A140T9I2;A0A140T9C9;A0A140T926
20.657	22.1862	21.6967	21.5299	20.4235	21.2016	20.4648	0.116181	0.206984	-0.820807	LRSAM1	Q6UWE0
22.6801	23.9236	23.9971	23.5403	25.4622	23.4838	25.2974	0.116457	0.207459	1.21254	CRYM	Q14894;I3NI53;I3L2W5;I3L325
26.5632	26.3154	26.1074	26.3028	26.5387	26.4452	26.7153	0.116538	0.207415	0.244205	DDX18	Q9NVP1
28.8335	28.9332	28.8825	28.8285	28.1422	28.8608	28.5941	0.116584	0.207342	-0.33703	PFKM	P08237
27.7405	27.1056	27.5125	27.2014	26.9933	27.0123	27.1556	0.11668	0.20751	-0.336244	PLIN3	O60664;K7ERZ3
28.2271	27.9774	27.7255	27.8037	27.6493	27.455	27.8063	0.116793	0.207661	-0.296569	PRPS2	P11908
20.1593	20.895	19.3752	20.2924	21.0501	20.6261	21.0774	0.116839	0.207621	0.737391	SEC14L2	H7C417;B3KRD8;O76054
26.7593	26.3125	26.4982	26.2488	26.0512	26.3219	26.1327	0.11696	0.207682	-0.2861	ACO1	P21399
25.439	25.6731	24.9232	25.1655	24.5358	25.2854	24.0265	0.116964	0.20756	-0.684323	RPS6KA3	P51812
29.2847	29.4726	29.6673	29.6744	28.8762	29.5777	28.7364	0.11703	0.207589	-0.461326	HLA-B	P18464;P30498
27.1392	27.1375	26.6614	26.3091	27.1789	27.3118	27.3167	0.117033	0.207467	0.457361	GLS	O94925
22.6269	22.6713	21.9063	22.4268	22.8717	22.7291	22.8148	0.117627	0.208648	0.397353	TSEN15	Q8WW01;F2Z3M0;E9PPN1;H0YCV5
27.9485	27.8722	27.5646	27.6091	27.5821	27.2386	27.5861	0.117773	0.20891	-0.279622	SMARCC1	Q92922
24.4421	24.1073	23.8485	23.741	23.6517	23.7539	23.6395	0.117853	0.208917	-0.35301	MRPL51	A0A087WU28;A0A0B4J2C1;Q4U2R6;M0R176
26.6422	26.4993	26.8355	26.4459	27.098	26.8321	26.6951	0.118047	0.209193	0.269321	DYNC1LI1	Q9Y6G9;E9PHI6
25.4766	25.1598	24.5036	25.2042	25.7072	25.841	25.2948	0.118127	0.209208	0.528305	LAMTOR1	Q6IAA8;F5GX19;F5H3Y3;H0YFI1;F5H479
26.3474	26.7972	27.148	26.8418	27.2191	27.551	26.9537	0.118261	0.209311	0.457632	DDX21	Q9NR30
22.9373	22.0959	21.6508	21.6286	23.634	22.229	23.2063	0.118556	0.209925	0.944933	UBL5	Q9BZL1;K7EQ43
28.6694	27.7621	26.8046	28.5172	28.9762	29.8863	28.4348	0.11863	0.209964	1.16076	RPL18	Q07020;G3V203;J3QQ67;H0YHA7;F8VUA6;F8VYV2
24.6341	24.5628	24.7036	24.3655	24.5779	24.8967	24.9855	0.118673	0.209895	0.253534	CYFIP1	Q7L576;A0A0G2JR96;A0A0G2JQT1
27.2247	27.3998	27.4518	27.2412	27.2342	27.1532	27.2057	0.118901	0.210424	-0.131654	MTA2	O94776
26.9212	27.2312	26.7695	26.7209	26.6037	26.6831	26.6709	0.119643	0.211876	-0.258137	ASNA1	A0A087WXS7;O43681
24.3463	24.6064	24.9318	24.4361	25.0725	24.6676	25.063	0.11992	0.212238	0.354226	USP39	A0A087X1B2;Q53GS9;B9A018
23.2217	23.3366	23.5373	22.894	21.8906	23.4083	21.9324	0.120003	0.21228	-0.83695	CLK3	P49761;H3BQG1
27.8527	28.0171	28.6284	28.36	28.4464	28.7929	28.6513	0.120302	0.212718	0.415636	CORO1C	Q9ULV4;B4E3S0
27.5292	27.5146	27.3084	27.3763	27.0661	27.4059	27.2422	0.120604	0.213288	-0.194059	CCAR2	Q8N163;G3V119;H0YB24
22.7524	23.0597	23.3592	23.201	23.7708	23.3549	23.273	0.12078	0.213594	0.373152	COPS8	E9PGT6;Q99627;H7C3S9
24.6259	25.0755	24.2714	25.2391	24.2072	24.5858	23.8646	0.120989	0.213819	-0.583789	MRPS30	Q9NP92
21.8901	22.8406	22.0847	22.2748	22.8291	22.7241	22.6452	0.120997	0.213694	0.460246	ELMSAN1	A0A0A0MSU2;A0A1C7CYX1;Q6PJG2;H7C1L3
24.2997	25.4168	25.1341	25.243	25.5572	25.7076	25.4781	0.121232	0.213944	0.557518	ATM	Q13315;E9PIN0
21.8322	19.1954	22.2616	20.3422	18.2793	18.9873	20.1493	0.121354	0.214133	-1.76924	HIST3H3	Q16695
27.2897	27.0807	27.101	27.0121	26.7585	27.1328	26.7823	0.121405	0.214121	-0.229679	GSS	P48637
24.6476	24.828	24.2072	24.9422	22.9265	24.6324	20.0123	0.121477	0.214089	-2.13252	CDK4	P11802;F8VYH9;F8VTV8;F8VWX7;F8VZ51;F8VZZ0
21.8746	21.508	22.8096	23.2615	22.4148	25.3241	24.1245	0.121509	0.214016	1.59102	MINOS1;MINOS1-NBL1	A0A087WU07;Q5TGZ0;R4GMM1;R4GNA1
26.0954	25.9571	25.9602	26.3171	26.1899	26.7471	26.2885	0.121575	0.214031	0.326073	HLA-E	Q6DU44;P13747
26.6386	26.6004	26.4912	26.8807	24.929	26.5582	26.1305	0.121957	0.214655	-0.780181	MOB3A	Q96BX8
26.658	26.4898	26.3649	26.3001	26.7993	26.4638	26.9137	0.121984	0.214626	0.272406	SEC23A	F5H365;Q15436
27.6429	27.1341	27.3347	27.2694	27.1836	26.768	27.1435	0.122266	0.21529	-0.313607	MVD	P53602;H3BP35
26.253	26.1439	26.0173	26.2603	25.9184	26.162	25.8248	0.122477	0.21567	-0.200197	CSTF2	E9PID8;P33240;E7EWR4;A0A0A0MT56
26.8127	26.882	26.9546	26.8669	26.1853	26.9678	26.3662	0.122799	0.216102	-0.372602	NAE1	Q13564
25.3007	25.6053	25.2936	24.9979	24.993	25.1575	24.3919	0.122957	0.216259	-0.451877	BRCC3	A0A087WZR3;H9KVA9;A0A0D9SF50
26.7834	26.6516	26.3533	26.8932	26.1043	26.566	26.3545	0.123252	0.216674	-0.328781	NFYC	Q5T6K7;E9PI99;Q5T6K5;Q13952;A0A0A0MT00;E9PJA8;E9PQR2
23.138	23.0485	22.8455	22.671	22.9208	22.0538	22.4498	0.123264	0.216576	-0.450921	ARMC6	B4E1N1;Q6NXE6;H0YGL0;H0YH65
21.1023	21.8456	22.2854	20.7383	21.0666	20.3002	20.5881	0.123711	0.217452	-0.841233	HECTD3	Q5T447
22.4459	22.066	22.0375	22.2673	22.8436	23.9493	22.2319	0.124045	0.218158	0.80409	SZRD1	Q7Z422
23.8112	24.3162	22.9632	22.898	23.0021	22.6045	22.5364	0.124056	0.218032	-0.782837	CARHSP1	Q9Y2V2
25.7142	25.1485	25.5141	25.1635	25.2943	24.6198	24.962	0.124242	0.218438	-0.426388	PIR	O00625
29.1832	29.2714	29.0642	29.149	29.1055	28.5174	28.9971	0.124933	0.219655	-0.293617	PSMA2	A0A024RA52;P25787
24.5054	24.0926	23.7678	24.3587	24.4939	24.4087	25.0415	0.124946	0.219545	0.466933	EXOSC8	Q96B26
23.0185	23.6426	22.5562	22.1981	22.6187	21.4724	21.9164	0.125242	0.220067	-0.851329	FOCAD	S4R400
27.0998	27.6807	27.5608	27.1783	27.0761	27.1283	26.9892	0.12541	0.22039	-0.315349	RAD23A	K7ENJ0;K7ELW1;P54725
24.5558	25.3682	25.2746	24.9268	24.8187	23.9494	24.6168	0.125513	0.220378	-0.569699	REL	Q04864
26.0026	25.9487	25.577	25.9634	26.0225	26.421	26.0522	0.125538	0.220296	0.292282	AP2M1	A0A087WY71;Q96CW1;E9PFW3;C9JJ47;C9JGT8
29.1221	29.0774	29.0931	28.6617	29.2656	29.3633	29.1205	0.12564	0.220286	0.261214	PRKCSH	K7ELL7;P14314;K7EPW7
29.6354	29.4145	29.2515	29.3523	29.9015	29.4044	29.818	0.126013	0.221037	0.294563	LGALS3	P17931;G3V3R6
27.3189	27.5216	27.4386	27.2561	27.1886	27.3463	27.126	0.126439	0.221822	-0.163501	TCEA1	A0A1W2PPZ5;P23193;A0A1W2PRL9
26.0502	26.7037	26.6915	26.5161	26.8465	26.6592	27.1842	0.126611	0.221969	0.406242	UQCRQ	O14949
21.5422	22.4211	22.1016	20.8272	22.5282	22.2363	22.79	0.126863	0.222427	0.795155	TRIAP1	O43715
26.5135	26.2712	26.1429	26.1771	26.0639	25.6178	26.1862	0.127073	0.222828	-0.320208	BAT3;BAG6	A0A024RCR6;A0A0G2JK23;P46379;A0A0G2JL47;X6REW1;A0A0G2JJM1;F6S6P2
25.4004	25.4974	25.2063	25.2533	24.6624	25.3092	25.0771	0.127514	0.223475	-0.323114	RAP2C	Q9Y3L5;A0A087X2C3
25.688	25.7729	25.4524	25.2861	25.0583	25.5461	24.587	0.127564	0.223507	-0.486042	NT5C	Q8TCD5;J3KSX6;J3KRC4;J3KSY6
26.3884	25.5581	24.6705	25.5814	26.6092	26.3963	26.0399	0.127641	0.223523	0.798865	RSL1D1	O76021;I3L3U9;J3QSV6;I3L3C4
23.4743	24.1775	23.9473	24.4877	24.5987	24.315	24.5999	0.127719	0.223562	0.482827	CIRBP	K7EJV1;K7EMY9;K7EPM4;K7EQR7;D6W5Y5;Q14011;K7EJV5;K7ER40;K7ENX8;K7ELV6;K7ELT6
22.4511	22.9381	22.3115	22.9736	22.8093	23.3181	23.166	0.128464	0.225	0.429217	SNX17	Q15036
26.8316	26.7012	26.9714	26.6693	26.9212	26.8911	27.1275	0.128559	0.225118	0.18657	TFAM	Q00059;H7BYN3
30.4283	30.5759	30.4579	30.5177	30.3585	30.1369	30.4827	0.12923	0.226473	-0.168943	DDX17	A0A1X7SBZ2;Q92841
24.1146	23.0391	22.7143	23.1503	22.5387	21.9934	22.9301	0.129238	0.22639	-0.767185	PCBP2	F8VRH0
23.5822	24.179	24.8311	24.8097	23.7356	23.5302	23.8282	0.129279	0.226316	-0.652485	BRD2	H0Y6K2;A0A140T9E9;A0A0G2JK44;P25440;U3KQA6;A0A0G2JHL0;A0A140T9F7;A0A140T9V2
19.928	20.382	19.8102	19.6946	19.4638	19.8654	19.292	0.129457	0.22656	-0.413295	MINK1	Q8N4C8
31.5486	31.8768	31.4804	31.405	31.3194	30.6164	31.4463	0.129731	0.22686	-0.450287	CALM2;CALM1;CALM3	P0DP25;P0DP24;P0DP23;H0Y7A7;E7ETZ0;E7EMB3;F8WBR5;M0QZ52;G3V479
22.2993	23.0733	23.1498	24.0678	23.5805	24.3528	24.0516	0.129751	0.226759	0.847405	ITPR2	Q14571
22.6777	23.3031	22.6154	22.6555	23.1237	23.5426	23.0411	0.129772	0.226644	0.422895	PIGS	Q96S52
30.7021	30.3808	30.1981	30.1444	30.0205	30.2033	29.9769	0.12987	0.226676	-0.28949	PSMA1	P25786;F5GX11;B4DEV8
24.6724	26.1767	25.5178	25.8916	24.6896	22.0073	25.11	0.130139	0.227205	-1.629	TMEM205	K7ELQ9;Q6UW68;K7EM09;K7EPR0
21.408	20.41	21.0391	21.4966	19.5931	20.2463	20.9977	0.13056	0.22786	-0.809381		A0A0J9YVQ7
24.2169	24.6142	24.4708	24.8108	24.2526	24.3842	23.9861	0.130564	0.227753	-0.320561	FN3KRP	Q9HA64;I3L2G3;I3L139
22.7659	22.3553	21.815	21.2757	22.456	23.0342	22.8918	0.130626	0.227697	0.741025	ATP6V0A1	Q93050;K7ERA0;K7EM24;K7ERA6;K7EN36;K7EPG4;F5H1T6;B7Z641;B7Z2A9
25.6202	25.3595	25.2177	25.8386	26.1041	25.511	26.3163	0.130948	0.228086	0.468112	MGLL	A0A0C4DFN3;Q99685;E7EWX8;H7C599;H7C4E0
30.1921	30.1911	30.1569	29.9631	29.9475	29.5913	30.0851	0.130984	0.228005	-0.251134	ACO2	A2A274;Q99798
26.3177	26.2619	26.4584	25.8039	26.0102	25.676	25.9295	0.130999	0.227876	-0.338569	PPAT	Q06203
21.5808	22.0972	20.9711	21.7928	20.0526	21.3622	21.0624	0.131036	0.227795	-0.78475	MYO1D	J3QRN6;O94832;K7EIG7;J3KRL0
29.3072	29.4489	28.9865	29.1566	29.6241	29.2601	29.6379	0.13108	0.227811	0.282556	FERMT3	Q86UX7;F5H1C6
24.9729	24.5954	24.5877	24.4182	24.361	24.3001	24.4819	0.131358	0.228192	-0.262494	OGT	O15294
28.3552	28.2636	28.2755	28.1288	28.3771	28.3382	28.3562	0.131772	0.229036	0.101417	SRRT	Q9BXP5;H7C3A1
26.5446	26.2221	26.003	26.0118	25.6289	25.3916	26.2056	0.131798	0.228986	-0.453338	C12orf10	Q9HB07;F8VR84;F8VQQ3
22.3902	23.7971	23.4037	22.8591	22.1941	22.6483	22.4406	0.131987	0.22926	-0.684867	POLD3	Q15054
24.1441	23.8409	23.8162	24.0468	23.9547	23.1843	23.6191	0.132083	0.229282	-0.375932	TXNL4A	P83876;K7ES07;K7EPA6;K7EJU2;K7ESL1;K7EMX5;O14835
23.2575	22.4502	22.9035	22.6453	22.1371	22.6653	22.3263	0.132233	0.229625	-0.437876	SNX11	J3QRB9;J3KTN6;J3QLV8;Q9Y5W9
27.2454	27.2371	26.9576	26.9813	27.4716	27.1044	27.5053	0.132578	0.230046	0.255087	UBA7	P41226
24.898	25.6224	25.383	25.6142	25.559	26.253	25.7537	0.132587	0.229942	0.475832	NOC3L	Q8WTT2
28.2606	27.6746	27.4904	28.1832	28.0944	28.7419	28.3422	0.133069	0.230916	0.490609	RPL22	P35268;K7ELC4;K7EMH1;K7ERI7
22.1902	21.8166	21.737	22.5178	22.1238	23.2117	22.6779	0.133502	0.23163	0.605719	MED14	O60244
28.1619	28.1124	27.9596	27.7793	27.7303	27.8801	27.8192	0.134134	0.233098	-0.193424	VPS35	Q96QK1
23.7497	24.4912	24.3701	24.1045	23.5094	24.178	23.0605	0.134345	0.233398	-0.596223	OSBPL9	Q96SU4
28.9539	28.8481	28.6672	28.2749	28.3042	28.3994	28.3983	0.134363	0.233307	-0.318731	CPNE3	O75131;A0A087WYQ3
29.1534	28.6096	27.9988	28.6022	29.047	29.2685	28.9975	0.134381	0.233217	0.513335	RPL36	Q9Y3U8;J3QSB5
29.3727	29.0692	29.0109	29.2921	29.2882	29.5572	29.3685	0.134617	0.233675	0.218404	TFRC	P02786;G3V0E5
22.558	23.0327	23.0753	23.11	22.3248	22.7804	22.6953	0.134823	0.233996	-0.343835	NADSYN1	Q6IA69;H0YCQ6;E9PKY6
28.9346	28.7446	28.6658	28.5329	28.9076	29.4818	28.8303	0.134925	0.234086	0.353762	ECHS1	P30084
26.4521	26.4409	26.242	26.3706	26.2567	25.7137	26.2784	0.135004	0.234027	-0.293459	ADSS	P30520
25.7863	25.6675	25.6566	25.6544	25.5255	25.2676	25.6927	0.135213	0.2344	-0.195944	CDK5RAP3	Q96JB5;J3QQY1
24.2054	24.4898	24.1114	24.4489	24.4614	24.7315	24.458	0.135241	0.23435	0.236411	NUP85	J3KT10;Q9BW27;J3QL54;J3QLH0;F5H0W7
27.197	27.3754	27.3135	27.2672	27.035	27.1512	27.2815	0.135254	0.234237	-0.132382	BTK	Q06187;U3NG26;Q5JY90
27.048	27.0277	26.8955	26.8567	26.9351	27.3305	27.2068	0.135558	0.23478	0.200444	NUDT21	O43809;H3BND3
28.2102	27.5042	27.0823	27.3103	28.0462	28.1884	27.9207	0.135649	0.234809	0.525004	RPS24	E7ETK0;A0A087WUS0;P62847
22.7865	22.5839	22.5054	23.2571	22.1815	22.0683	22.7141	0.135744	0.234821	-0.461936	USP36	A0A075B784;Q9P275;K7ELR5;Q8IXW9;E9PEW0
27.7231	27.6428	27.7357	27.8598	27.6833	27.6214	27.619	0.136204	0.235747	-0.0991398	LPXN	O60711;B7Z5P7
29.5527	29.4255	29.558	29.3351	29.6549	29.6562	29.5012	0.1363	0.235918	0.136306	ANXA11	P50995
26.1891	26.5584	26.4626	26.5592	26.4207	26.0928	26.0651	0.136661	0.236495	-0.249447	SNAP23	O00161;H3BNE1;H3BR18;H3BM38;H3BPJ0
21.1214	20.9124	21.8698	20.8227	22.0299	22.681	21.2272	0.136748	0.236488	0.797768	GCC2	Q8IWJ2;H7BYJ9;B8ZZW2
23.6843	21.7085	22.9387	23.8757	22.3749	21.7472	21.8222	0.13678	0.236388	-1.07038	POLR2G	P62487;E9PIU7;H0YEE4;E9PKH3
25.6176	25.4411	25.5296	25.059	24.9763	25.3529	24.9339	0.137187	0.236956	-0.32416	DCTD	P32321;D6RBJ9
26.0593	22.9981	21.609	24.0876	21.8429	21.3142	21.9559	0.137594	0.237682	-1.98416	RAB24	Q969Q5;F8W8H5
23.2536	22.3141	23.4886	23.1984	21.3195	20.2404	23.3203	0.137828	0.237905	-1.43696	KCMF1	Q9P0J7
22.8964	23.0768	23.565	23.5472	23.6722	24.7343	23.4534	0.137859	0.237868	0.681939	VAPB	O95292
25.3896	25.389	25.6436	25.5489	23.6369	25.8531	23.8244	0.13824	0.238478	-1.05462	BCKDK	O14874;H3BS02;H3BTL2
28.7658	28.5423	28.7025	28.3888	28.4001	28.3723	28.4793	0.138397	0.238534	-0.182611	OLA1	J3KQ32;Q9NTK5
28.5072	28.4983	28.52	28.6225	28.3966	28.0833	28.5243	0.138417	0.238422	-0.202255	PCK2	Q16822;B4DW73;H0YML5;H0YM31;A0A0A0MS74
27.5342	27.3931	27.5205	27.0582	27.1433	27.1561	27.1372	0.138465	0.238321	-0.230999	HK2	P52789;E9PB90
21.7929	21.0656	22.253	21.8887	21.8703	22.5602	22.8096	0.138526	0.238336	0.663327	SF1	H7C561
21.8349	22.7537	23.1264	21.0606	23.2822	23.4139	22.8772	0.138771	0.238851	0.997219	SDF2	Q99470
23.1877	23.2774	23.5808	23.4113	24.1438	23.251	24.0696	0.138831	0.238743	0.457146	GID8	Q9NWU2
29.1462	28.7675	28.4961	29.1288	29.1137	29.934	29.1419	0.13904	0.23892	0.51184	PCNA	P12004
25.7836	26.0983	25.9763	26.0484	25.9218	25.6312	25.8074	0.139334	0.239493	-0.189853	TAOK3	Q9H2K8;G3V1Q8
19.8857	20.2944	19.9728	21.7665	22.6684	20.9418	21.3851	0.139566	0.239789	1.18525	MRPL30	Q8TCC3;B8ZZV5
24.2864	24.7762	24.8418	24.481	24.0398	22.558	24.4941	0.139809	0.240099	-0.899032	ALKBH5	Q6P6C2
26.8706	27.0831	26.8455	26.6668	26.4406	26.6366	26.8121	0.139998	0.240284	-0.236744	MSH2	P43246;E9PHA6
25.2478	25.0065	24.7753	24.9523	24.9554	24.6015	23.7711	0.140138	0.240459	-0.552805	AKT2	M0R0P9;P31751;J3QKW1
23.5261	24.1694	23.4076	24.0781	23.9088	24.9322	24.3162	0.140225	0.240505	0.590394	MPDU1	J3KSI4;I3L405;I3L261;I3L1D2;I3L4E0;J3QS48;I3L295;J3KTK8;J3QQZ4;J3KT75;J3QW43;J3QRD5;O75352
28.7706	25.7272	28.1676	29.4118	26.0817	25.2592	27.1586	0.140288	0.240512	-1.85282	PTMA	B8ZZQ6;P06454;B8ZZA1;B8ZZW7;H7C2N1
27.211	26.7378	26.9366	26.8806	27.2532	27.0091	27.29	0.1403	0.240404	0.242601	RBM39	Q14498;G3XAC6;A0A0U1RQH7;H0Y4X3
25.3424	25.5038	25.1477	25.2988	24.5372	21.9501	25.1492	0.14033	0.240336	-1.44433	SLC25A13	Q9UJS0
26.0055	25.7997	25.6965	25.719	25.8491	27.119	26.1763	0.140421	0.240294	0.576274	RAB8A	P61006
24.8311	25.1223	24.7197	25.1555	24.9739	25.5022	25.3579	0.140459	0.240237	0.320855	NOB1	Q9ULX3;H3BUR4
23.4854	23.7625	24.8833	24.9791	23.754	23.3852	23.2212	0.140507	0.240328	-0.824131	EXOC1	Q9NV70
29.2017	29.4318	29.1863	29.145	29.157	28.8695	29.1289	0.140533	0.240263	-0.189387	RPL12	P30050
23.8607	23.5558	23.1078	23.8949	23.1377	23.0724	23.393	0.140564	0.240197	-0.403757	MRPS18C	H0YAG5;D6RCM2;Q9Y3D5
28.7821	28.4089	27.7989	28.4122	28.7438	29.5222	28.581	0.140754	0.240422	0.598454	RPS13	P62277
23.0606	23.2999	24.1649	23.919	22.9842	22.1449	23.4153	0.141185	0.241226	-0.762974	BCAT1	P54687
23.4654	23.3994	23.4416	23.6598	23.1313	23.4723	23.3104	0.141225	0.241179	-0.186896	COA6	X6R5Z6;Q5JTJ3
28.551	28.3372	28.3918	28.1403	28.2619	27.8498	28.1889	0.141448	0.241532	-0.254874	ECH1	Q13011;M0R248;M0QZW4
28.8799	28.8907	28.7648	28.6188	28.9714	28.8815	28.9212	0.141543	0.241527	0.136149	ACADVL	P49748
22.6632	22.5317	22.8795	22.3976	21.5262	22.1823	22.6187	0.141909	0.242138	-0.508938	FOXRED1	Q96CU9
23.9869	23.4854	22.6652	22.9976	23.9499	24.1775	23.6358	0.142056	0.242386	0.637251	RNF40	H3BP71;O75150
26.4306	25.82	25.9205	25.6794	25.7504	25.6671	25.2712	0.142361	0.242794	-0.399746	PLRG1	O43660
27.3446	27.4885	27.2314	27.0784	27.0191	27.1505	27.1236	0.142545	0.242984	-0.187963	COPS4	Q9BT78;D6RFN0;D6RAX7;D6RD63
29.6192	29.1629	29.6406	28.7421	28.8289	28.5768	29.0315	0.142917	0.243567	-0.478807	MYL12A;MYL12B;MYL9	J3QRS3;P19105;O14950;P24844;J3KTJ1
28.0519	28.3083	28.1668	28.1396	28.1539	28.4414	28.4285	0.14303	0.243667	0.174634	NUP210	Q8TEM1
30.7006	30.616	30.424	30.5118	30.5884	30.8889	30.7421	0.143051	0.243576	0.176723	ACADM	Q5T4U5;P11310;B7Z9I1
27.464	26.6934	26.7309	27.2911	26.4442	26.8344	26.5504	0.143418	0.244393	-0.435181	PDCD5	O14737;K7EQA1;K7ESJ4
22.4657	21.1043	23.8666	23.2431	24.2028	23.7792	23.747	0.143513	0.244395	1.23971	TCAF2	A6NFQ2;H0YC74;A0A1B0GVM2
23.1706	23.5966	22.9726	23.8097	23.0196	23.1277	22.7246	0.143717	0.244536	-0.430113	MAP3K4	F5H4R1;J3KNB8;F5H538;Q9Y6R4
24.3505	23.8399	23.9989	24.533	23.9183	23.8897	23.7223	0.143747	0.244483	-0.337121	LYSMD2	Q8IV50
32.3976	31.8544	32.0483	32.314	31.797	32.0604	31.7162	0.144304	0.245402	-0.295724	NME1-NME2;NME2;NME1;NME2P1	Q32Q12;J3KPD9;P22392;E7ERL0;O60361
24.6919	24.6802	23.5093	26.1028	25.939	25.7536	25.8109	0.144332	0.245364	1.08841	CNTRL	Q7Z7A1;Q5JVD1
21.6542	21.7133	22.2094	21.7347	21.1305	21.9134	20.5133	0.14435	0.245251	-0.6422	POLD4	Q9HCU8;E9PL15;A0A087WWV3
30.5346	30.704	30.3717	30.4618	30.1539	30.5604	29.8766	0.1446	0.245679	-0.321085	HMGB1;HMGB1P1	Q5T7C4;P09429;B2RPK0
23.2614	25.0991	24.7982	23.9549	23.4886	22.9782	23.6633	0.144712	0.245706	-0.901707	DHX36	Q9H2U1;E7EWK3
27.4941	27.9585	28.0739	27.8292	27.5587	27.1057	27.7349	0.144948	0.245956	-0.372501	HN1	J3KT51;Q9UK76;J3KSH8
22.7191	23.4435	24.823	23.4998	22.9906	22.8543	22.0475	0.144985	0.245886	-0.99057	F8A1	P23610
24.3984	24.917	24.8276	25.3859	24.407	24.7285	23.7961	0.144992	0.245757	-0.571693	IKBKAP	O95163;F5H2T0
24.6617	24.2884	24.6718	23.7782	23.7236	24.0139	23.969	0.145852	0.246995	-0.447861	LRCH1	Q9Y2L9
25.8887	25.8958	24.9023	25.066	26.3368	25.8741	25.8553	0.145892	0.246894	0.583897	GNG5	P63218
24.0384	24.3495	24.1859	23.4265	23.8026	23.226	23.5465	0.146121	0.247218	-0.475026	PUM2	A0A0C4DG68;A0A0A0MR59;Q8TB72
22.2681	23.2057	21.4795	21.3688	23.1565	22.525	23.3782	0.146316	0.247492	0.939429	NFATC2	Q13469
22.8851	22.5017	22.4644	22.6203	22.1327	22.034	22.6637	0.146483	0.247612	-0.341054	RALB	P11234;C9J6B1;C9JQB3
23.1437	23.5454	23.6036	23.0802	22.8021	23.1098	23.164	0.146613	0.24786	-0.317955	SDCBP	G5EA09;O00560;B4DHN5;E9PBU7
29.5645	29.0836	28.8189	29.275	28.91	28.8719	28.8085	0.146696	0.247877	-0.322061	FDPS	P14324;A0A087WVN4;A0A087X090
22.6449	23.5984	22.4369	22.8673	23.6605	23.6385	23.0959	0.146734	0.247768	0.578086	FARS2	O95363;Q5JRF7
28.9298	29.0941	28.7434	28.9627	28.6812	28.737	28.8741	0.14675	0.247656	-0.168379	MCM3	P25205;J3KQ69
21.8619	21.8876	19.4583	20.6122	22.2899	22.2395	21.9102	0.146912	0.24794	1.19152	HNF1B;HNF1A	E0YMJ8;A0A0C4DGS8;A0A087WZC2;P35680;A0A087WXS2;U3KQS6;A0A0A0MQU7;F5H0K0;A0A0A0MTK8;P20823
24.7182	24.8813	24.7666	24.9408	25.0741	24.9154	24.8892	0.146918	0.247807	0.132877	AKAP13	A0A087WTD7;A8MYJ1;Q12802;A0A087WY36
20.8881	23.0775	20.812	20.5282	23.7062	21.4495	23.6085	0.147029	0.247843	1.59497	FLOT1	O75955;A2AB13;A2AB11;A0A0G2JJQ6;A2AB12;A2AB10;A0A140T9R1
23.6278	23.923	23.6237	24.1376	23.8951	24.2693	24.2372	0.147036	0.247745	0.305885	LPCAT1	A0A0G2JQ62;Q8NF37;A0A0G2JRI7
23.2788	23.7458	23.7538	23.6559	23.2636	23.5163	23.2775	0.147097	0.247739	-0.256113	RBM19	Q9Y4C8
26.8107	27.2843	27.0364	27.1744	26.8868	26.8597	26.8605	0.147166	0.247711	-0.207417	U2SURP	O15042;E7ET15
27.8806	27.8894	27.7842	27.623	27.5777	27.6365	27.7405	0.147349	0.247914	-0.142761	TRIM21	P19474
29.4093	29.0579	28.945	28.9789	28.992	28.7285	28.8479	0.147728	0.248558	-0.241624	RBBP7	Q16576;E9PC52;Q5JP01
21.5704	20.8273	20.5622	20.989	21.2262	21.8244	21.4111	0.148186	0.249306	0.500029	TIMM22	Q9Y584
25.2614	25.9101	25.995	25.4355	26.108	25.8654	26.1183	0.148407	0.249481	0.380075	PSMD9	J3KN29;O00233;F5H5V4;F5GX23;F5H169
29.684	29.4182	29.4317	28.8176	29.1108	28.3595	29.0322	0.148626	0.249805	-0.503723	PSMA5	P28066
21.8997	23.1163	23.5071	22.4423	22.065	22.25	21.5939	0.148701	0.249836	-0.771725	ERICH5	Q6P6B1
21.1874	21.7955	21.7275	21.5814	21.498	22.3094	22.3676	0.148929	0.250116	0.48538	BTN3A3;BTN3A1	C9JZT5;O00478;O00481
25.4109	25.3284	25.1629	25.3691	25.3752	23.7627	24.7753	0.148932	0.249983	-0.680074	POLD2	P49005;F8W8R3;A0A087WWF6;C9IZD2;C9J8Z7;C9JLE1
26.3127	25.3189	25.1478	25.8741	24.9684	24.8473	25.4073	0.149066	0.250105	-0.589063	LSM3	P62310
28.2547	28.5805	28.6027	28.648	28.2642	28.3573	28.3782	0.149108	0.250038	-0.188262	ATAD3A	Q9NVI7
26.6472	26.3077	26.5799	26.0418	26.6562	26.6806	26.6838	0.149245	0.250237	0.279376	TXNDC12	O95881
26.9945	26.1193	26.1046	26.266	25.8423	25.3742	26.236	0.149409	0.250506	-0.553629	RAB5C;RAB5B;RAB5A	K7ERI8;K7ERQ8;P51148;F8VVZ0;F8VUA5;F8VVK3;K7ENY4;P61020;P20339;F8VWU4
28.8277	28.389	28.3111	28.2686	27.9867	28.2001	28.2922	0.14943	0.250373	-0.289369	NDUFS2	O75306
24.935	24.8875	24.8813	24.1962	25.0891	25.0889	25.065	0.149476	0.250295	0.356002	GUK1	B1ANH0;B1ANG9;B1ANH2;Q16774;B1ANH5;B1ANH6;B1ANH3
24.6561	25.0578	24.9967	24.7127	25.2961	25.1625	24.8961	0.149666	0.250577	0.262431	NFS1	Q9Y697;F2Z2E7
23.6608	23.504	22.7051	24.6073	24.3097	24.5586	24.3669	0.149733	0.250503	0.792444	NSDHL	Q15738;C9JDR0
24.1132	25.1589	24.716	24.3641	23.8075	23.3166	24.5689	0.149943	0.25086	-0.690366	SMARCD1	Q96GM5;F8VRQ4;F8VUB0
30.4203	30.141	30.6757	30.2319	30.5239	30.6991	30.6235	0.149977	0.250844	0.248257	RPLP0	P05388;F8VU65;F8VWS0;F8VW21;F8VPE8;G3V210;F8VQY6;F8VRK7;F8VZS0;F8VS58;F8VWV4
25.9733	25.9196	26.5062	26.0923	26.8005	26.5019	26.1748	0.150873	0.25235	0.369538	ARPC5L	Q9BPX5
22.6787	23.4551	23.3022	23.081	22.4459	22.3056	23.142	0.151402	0.253519	-0.498093	INPP4A	Q96PE3
28.5163	28.3988	28.4745	28.1412	28.498	28.6374	28.546	0.151957	0.254094	0.177767	USO1	O60763
25.6626	25.6773	25.0196	25.3252	25.3583	24.8726	24.867	0.151958	0.25396	-0.388532	OCIAD2	Q56VL3
21.5146	21.5631	21.718	21.1349	21.6304	22.0833	21.6878	0.15304	0.255655	0.317837	ACOT8	O14734;H0Y698;Q9BR14;E9PMC4;E9PIS4;E9PJN0
24.7864	23.7329	24.1987	23.868	24.5054	24.6922	24.6644	0.153398	0.256247	0.474145	TRAPPC1	Q9Y5R8;I3L3S0;I3L3V5
27.1315	27.3874	27.3287	27.423	27.3922	27.6589	27.4269	0.153454	0.256207	0.174971	ETF1	B7Z7P8;P62495
22.1828	22.5944	22.7834	21.4706	22.647	23.818	22.6827	0.153787	0.256775	0.791399	CASP8	E7ETB7;E7EQ06;A0A0A0MS31;Q14790;E7EQ01;E7EVN1
21.3807	23.0993	22.5449	23.1922	23.3402	23.3249	23.4908	0.153851	0.256737	0.831017	FASTKD5	Q7L8L6
26.6105	26.1517	25.9856	25.6541	25.8078	25.1708	25.8299	0.154499	0.257705	-0.497652	EIF4A2	E7EQG2;Q14240
21.7673	22.2307	22.2057	21.8097	21.7304	21.9148	21.2728	0.154593	0.257691	-0.364041	HEATR3	Q7Z4Q2
25.0257	25.7828	25.4316	26.1134	23.7987	25.9804	22.6877	0.154652	0.25773	-1.4328	C11orf58;SMAP	E9PM92;O00193;E9PRZ9
24.2994	24.1384	23.8599	23.7159	21.9774	23.7408	23.7158	0.154787	0.257948	-0.858764	ARMC1	Q9NVT9;E5RJ86
25.4167	25.6607	25.4572	25.2648	25.4953	24.643	25.0689	0.154795	0.257813	-0.380788	TBL3	Q12788;J3KNP2
24.7279	24.7574	25.3803	24.4775	24.9424	26.2032	25.3067	0.154834	0.257795	0.648365	CLPP	Q16740;M0R208
26.7524	26.8618	26.9545	26.6218	26.2779	26.9087	25.9609	0.155033	0.258069	-0.415149	WDR61	H0YN81;Q9GZS3;H0YL19;H3BQA8;H0YMF9
25.9897	25.7909	25.8437	25.4364	25.3536	25.6473	25.5118	0.155212	0.258184	-0.260962	EIF3J	O75822
21.4642	22.0351	23.1001	21.9163	21.3556	21.7931	20.9333	0.155286	0.258235	-0.768267	RBL2	Q08999;F5H837
27.2404	26.9386	26.8548	26.7317	27.0452	27.3185	27.1833	0.155667	0.258702	0.240912	AP3B1	O00203
24.2829	25.8951	24.7423	25.3081	24.4835	23.8992	24.5486	0.156372	0.259987	-0.746676	ANXA6	E5RK69
27.2192	27.4283	27.6407	27.5081	27.58	27.5716	27.8149	0.156624	0.260319	0.206422	DIAPH1	A0A140T8Z0;A0A0G2JH68;O60610;H9KV28
22.4229	23.6891	23.2018	23.7935	22.2306	22.4979	23.0178	0.156768	0.260591	-0.694755	NF2	P35240
27.1042	26.6882	26.4427	26.5502	26.7379	27.3698	27.1334	0.156786	0.260539	0.384029	RANGAP1	P46060
24.8122	24.9669	24.6359	24.5381	24.7394	24.1671	24.4171	0.156791	0.260419	-0.297072	POLDIP2	Q9Y2S7;B4DEM9
27.2611	26.9993	27.0582	27.1776	26.9907	26.5001	27.064	0.156926	0.260429	-0.27238	PPM1G	O15355
30.386	30.1915	30.1462	30.0798	30.0084	30.1449	30.0198	0.157006	0.260485	-0.143181	YARS	P54577;A0A0C4DGZ5
29.8851	29.4257	29.5246	29.6368	29.2816	28.8826	29.6245	0.158179	0.26262	-0.355144	PTGES3	A0A087WYT3;Q15185;B4DDC6
21.7667	22.4668	21.8938	21.4166	21.4952	21.0616	21.6316	0.158416	0.262947	-0.489844	MROH1	E9PHY8;Q8NDA8
27.05	26.8126	26.8164	26.6786	26.9763	27.442	26.9223	0.158532	0.262966	0.274127	SUCLG1	P53597
25.1507	25.2835	25.4116	24.9194	24.8329	25.1313	24.8833	0.158956	0.263651	-0.242146	FAM91A1	E7ER68;Q658Y4
25.3841	24.2592	24.1935	24.663	25.2494	25.4158	24.924	0.158978	0.263539	0.571466	RPS4Y1	P22090;C9JEH7
21.2125	21.4219	21.5881	20.9027	21.9967	21.567	21.4114	0.159113	0.263689	0.377077	RBM7	J3KPD3;Q9Y580;G3V1T9;I3L521;F5GXV8;F5GY08
25.4038	25.6171	25.7784	25.2252	25.3352	24.3603	25.3131	0.159439	0.264102	-0.503257	TBCE	Q15813
26.888	26.9585	27.1966	26.854	27.0262	27.5039	27.1414	0.159624	0.264354	0.249598	CPT2	P23786;A0A1B0GV75;A0A1B0GVF3;A0A1B0GTB8;A0A1B0GWC0
26.2477	26.4718	26.6637	26.6475	26.6477	26.7969	26.6771	0.159684	0.264356	0.199558	XRN2	Q9H0D6
29.8867	29.1488	28.4238	29.3687	29.7778	30.6844	29.4832	0.159757	0.264402	0.774774	RPL13A;RPL13a	P40429;M0QYS1;Q8J015
27.5773	27.3912	27.4175	27.0707	27.2405	27.2014	26.7383	0.159925	0.264686	-0.304074	EIF4E	D6RBW1;P06730;H0Y8J7
24.0612	24.9261	24.4299	24.5121	24.086	21.7404	24.1671	0.160073	0.264898	-1.15111	GIGYF2	Q6Y7W6;I1E4Y6;E7ESB6
25.8771	26.0871	26.097	26.2356	25.8909	25.976	25.91	0.160083	0.264794	-0.148557	RABGAP1L	Q5R372;A0A0C4DG54
21.5631	22.9894	22.074	21.7714	21.5221	21.3949	21.5311	0.160131	0.264835	-0.616763	STRIP1;STRIP2	Q5VSL9;Q9ULQ0
22.2374	21.8361	22.0368	21.8821	22.53	21.9523	22.4143	0.160206	0.264857	0.30073	CKS1B	Q9BZU3;Q5T179;P61024
22.9156	23.8019	24.0897	24.2476	24.1973	24.737	24.2385	0.160263	0.264795	0.627256	MTIF2	P46199;H7C213
28.7738	28.733	28.7972	28.2504	28.2781	28.5267	28.2758	0.160288	0.264686	-0.278404	FNBP1	B7ZL14;Q96RU3;H0Y7W6
32.1278	31.9508	31.5478	31.9066	31.6629	31.7	31.5528	0.160418	0.264756	-0.244702	CSE1L	P55060
30.6673	30.9824	30.9016	30.7618	30.664	30.7425	30.6499	0.160489	0.264706	-0.14279	STIP1	P31948
23.756	23.481	23.5694	23.8721	23.5176	23.1782	23.5826	0.161411	0.26677	-0.243524	PHAX	Q9H814
36.6104	36.1479	36.3002	36.1203	36.1514	35.7689	36.1318	0.161435	0.266659	-0.277352	ACTB	P60709
22.6011	22.5468	21.931	21.9412	18.9316	21.0716	22.4331	0.162052	0.267909	-1.44291	ZMIZ2;ZMIZ1	E7EWM3;A0A087X127;Q8NF64;F6WR09;Q9ULJ6
25.29	24.1573	24.6102	24.5782	24.3488	23.0514	24.3418	0.162552	0.268664	-0.744923	NUDCD2	Q8WVJ2;E5RFP0
23.7718	23.2166	23.9362	22.7716	22.9218	22.6822	23.0562	0.16264	0.268624	-0.53728	ACTG1	K7EM38
27.4081	28.0627	27.5728	26.7401	28.4142	27.9061	27.7889	0.162848	0.269169	0.590482	RPLP1	P05386
26.5707	26.4038	25.9633	26.2253	26.1252	25.6563	26.1082	0.163041	0.269441	-0.32751	ABHD10	Q9NUJ1
21.1641	22.0237	22.8241	21.9961	21.3307	21.2419	21.4511	0.163051	0.269331	-0.660766	TBC1D10B	Q4KMP7
26.4509	26.5312	26.6205	26.552	26.3716	26.5462	26.3963	0.163173	0.269377	-0.100596	PRPF31	Q8WWY3;E7EVX8;E7EU94;E7ESX0;E7EN72
24.276	24.4567	24.5349	23.6455	24.1661	23.1104	23.6965	0.163582	0.269898	-0.570618	MRI1	Q9BV20
27.9224	28.2843	28.0653	28.2384	28.2248	28.3009	28.3665	0.163769	0.270109	0.169783	PRKCD	Q05655
23.747	23.5987	23.4135	23.3934	23.1577	21.4717	23.4307	0.163773	0.26997	-0.85146	UEVLD	Q8IX04
25.8677	25.106	25.1422	24.8496	24.7616	24.5529	25.0253	0.163808	0.269924	-0.461457	SREK1	Q8WXA9
22.7578	24.4859	24.4625	24.306	23.378	23.269	22.8671	0.164019	0.270172	-0.831707	ZMAT2	Q96NC0;R4GNG8
26.0994	26.0728	25.9869	25.7022	25.6246	25.9157	25.7242	0.16403	0.270043	-0.210519	NUP133	Q8WUM0
27.3967	27.6352	27.0696	27.3926	27.2263	27.0794	27.1197	0.164076	0.270001	-0.231723	CSNK2B;CSNK2B-LY6G5B-1181;CSNK2B-LY6G5B--991	Q5SRQ6;P67870;Q5SRQ3;N0E472;A0A0G2JM12
23.5066	23.7929	23.7767	24.0875	23.2977	23.5761	23.674	0.164915	0.271542	-0.274992	UBE4A	Q14139;B7Z7P0
21.698	22.2291	21.6553	20.0571	22.6074	22.0107	22.4139	0.164935	0.271413	0.934112	EARS2	H3BTB7;Q5JPH6
28.5822	28.2892	28.3081	28.436	29.3388	28.1955	29.1967	0.164944	0.271335	0.506436		A0A0U5Q247
27.7266	27.821	27.6777	27.7164	27.4611	27.7816	27.5291	0.165078	0.271403	-0.144875	DDX46	A0A0C4DG89;Q7L014;D6RJA6
28.3481	28.3131	28.8071	28.248	28.006	28.3369	28.1064	0.165156	0.271449	-0.279297	IDH1	O75874
27.5079	27.5843	27.6269	27.4323	27.2704	27.5986	27.0775	0.165623	0.272412	-0.22232	GLOD4	Q9HC38
34.115	33.7964	33.4092	33.9138	34.0571	34.1523	34.0796	0.1657	0.272352	0.287688	HIST1H4A	P62805
22.7244	22.8998	22.95	22.5786	22.178	22.8872	22.2686	0.165723	0.27225	-0.343589	CALCOCO2	I3L4E1;I3L493;D6RBI4;D6RJE7;D6RF70;Q13137
27.4706	27.0218	26.7881	26.8202	27.3535	27.3397	27.2908	0.165779	0.272174	0.302838	CSDE1	O75534;E9PLT0
22.8255	23.2846	22.9389	23.0122	23.3135	23.0341	23.4463	0.166055	0.272805	0.249344	KPNA2	P52292
24.6163	24.3438	24.6777	25.0204	24.5243	22.6895	24.2988	0.166197	0.272981	-0.827021	NMRAL1	Q9HBL8;I3L1Y8;I3L3Z0
26.2856	26.3661	26.3102	26.443	25.7798	26.3875	26.1423	0.166712	0.273827	-0.24802	DDX42	A0A0A0MSJ0;Q86XP3
24.5922	24.458	24.1087	24.9302	24.7806	25.24	24.7254	0.166719	0.2737	0.39303	RRP1	P56182
24.6737	25.0229	24.4398	24.7416	24.7023	23.9945	24.3822	0.16672	0.27356	-0.359805	PSMF1	Q5QPM7;Q92530;Q5QPM9
22.065	22.1839	22.4133	22.1823	21.7432	21.8779	22.2591	0.167129	0.274186	-0.251069	BSDC1	E9PQA7;Q9NW68;E9PS77
23.8907	24.6888	24.7634	24.3816	23.7408	24.2418	24.0337	0.167985	0.275629	-0.425675	IRF9	Q00978;H0YNP4;H0YMB6;H0YMB0
21.6976	22.7582	23.6739	22.3179	21.0614	22.6236	20.8922	0.167995	0.275525	-1.08614	MDC1	Q14676
28.3928	28.3796	28.1101	27.971	28.3513	28.6772	28.349	0.169071	0.277305	0.245749	NNT	Q13423;E9PCX7
23.1641	24.8897	24.1936	23.6762	24.7196	24.8202	24.5324	0.169116	0.277223	0.709836	PPP1R8	Q12972
23.031	22.6699	23.4184	24.2008	22.0738	23.154	22.5054	0.169343	0.277657	-0.752299	GFM2	Q969S9;D6RAL1
26.4498	27.0889	26.9174	26.5524	26.5551	26.2062	26.5263	0.169425	0.277661	-0.322933	TBCB	Q99426;K7EP07;K7EK42
23.1134	22.4825	21.859	22.6179	22.6025	23.4121	23.3416	0.169714	0.278056	0.600555	COG8	Q96MW5;H3BQV3;A0A087X1T3;H3BSH5
23.7965	24.1894	24.2463	24.332	24.3207	24.575	24.2922	0.17008	0.278652	0.254933	RCL1	Q9Y2P8;Q5VZU3
30.3422	30.2526	30.1579	30.3531	30.2368	30.1991	30.0296	0.170305	0.278928	-0.121285	WDR1	O75083;D6RD66
21.6941	23.9849	22.4798	24.4712	21.7094	22.7184	20.6758	0.170393	0.278886	-1.45632	RNASEH2B	Q5TBB1;A0A087WXR7
20.9919	23.6559	21.8965	22.8921	21.7243	18.9469	21.5305	0.170785	0.279647	-1.62517	GTPBP6	H0Y2S1;O43824
24.9501	24.7395	24.533	24.6969	24.6008	24.2447	24.6422	0.171089	0.280032	-0.233972	METTL3	Q86U44
26.6178	26.9436	26.4747	26.6334	25.9742	26.5082	26.5744	0.171116	0.279943	-0.315088	GNL3	Q9BVP2
24.4533	23.6162	23.2893	23.0585	24.3923	23.7719	24.6914	0.171137	0.27985	0.680901	LLPH	Q9BRT6
26.9629	26.9721	27.5662	26.8747	27.0586	26.0591	26.6897	0.171598	0.280678	-0.491523	PRPS1	P60891;B1ALA9
24.2091	24.8519	24.5439	24.6698	24.1163	24.5468	24.0609	0.172007	0.281316	-0.327339	DDX50	A0A087WVC1;Q9BQ39
28.3949	27.8862	26.7879	27.7896	28.2386	29.4749	28.0433	0.172022	0.281199	0.870943	RPL35	P42766;F2Z388
24.8026	24.3752	24.5067	24.8634	25.2438	24.7461	24.8256	0.172159	0.281469	0.301474	SH3BP1	Q9Y3L3
23.0308	23.1323	23.4341	23.3712	22.5438	23.4011	22.4705	0.172239	0.281434	-0.436953	GTPBP10	A4D1E9;C9J8R7;C9JNI1
33.8461	33.3157	33.4422	33.4882	33.2942	33.0654	33.4358	0.172256	0.281338	-0.257939	TUBB	Q5JP53;P07437;Q5ST81
22.8432	22.9157	22.7235	23.1146	23.3249	24.8681	22.9194	0.172608	0.281981	0.804835	CHTOP	A0A087X1B7;X6R700;Q9Y3Y2;Q5T7Y7
29.9833	29.251	29.5262	29.7004	30.1526	29.6919	30.0278	0.172676	0.281927	0.342166	TUBB4B	P68371
26.4013	26.6875	25.893	26.5351	26.7414	27.0065	26.5154	0.172689	0.281785	0.37516	BCAP31	P51572
26.4176	26.3042	26.795	27.0869	26.0163	26.43	26.3709	0.17269	0.281644	-0.378485	PPME1	Q9Y570
22.4228	22.8752	22.5599	24.0969	23.8564	23.7963	23.5077	0.172773	0.281669	0.731464	FADS2	O95864
21.8024	22.3173	21.8215	21.5443	22.09	22.3135	22.1593	0.172811	0.281608	0.316233	CD46	P15529
22.8115	20.5538	20.781	22.5317	18.8128	21.3734	20.3865	0.172829	0.281466	-1.47859	HLA-DRB5	Q30154
27.8638	27.6684	27.8017	27.8415	27.7287	27.5036	27.7497	0.172874	0.281399	-0.133178	ETFA	P13804;H0YLU7;H0YK49;H0YNX6;H0YL12;H0YKF0
25.4283	25.0323	24.8423	25.3154	25.2081	25.6539	25.5198	0.17296	0.281445	0.305976	MRPS7	J3QLS3;Q9Y2R9;J3QQS1;J3KSI8;J3QKW2
23.1416	23.5956	23.5416	24.4176	23.3024	23.2829	22.7821	0.173112	0.28161	-0.551606	SFSWAP	Q12872
26.3694	25.7741	25.6486	25.9452	25.5797	25.6341	25.6934	0.173232	0.281824	-0.298587	PEPD	P12955
28.6061	28.7293	28.3839	28.4977	28.6815	29.0785	28.6144	0.173315	0.281842	0.237195	PSMD6	Q15008
24.0014	24.5917	24.0977	24.8269	23.9608	23.7496	24.2008	0.173385	0.281821	-0.40903	C20orf27	Q9GZN8;H7BYU9
28.9018	28.7993	28.8827	28.5433	28.6212	28.5011	28.7038	0.174488	0.283842	-0.173046	EIF4A3	P38919
21.9048	22.3492	20.8651	21.8233	22.5248	22.1516	22.3328	0.175085	0.285162	0.600785	COX15	Q7KZN9
28.2947	28.1643	28.0077	27.7309	27.5521	28.0385	27.6615	0.175263	0.285411	-0.298677	ACAA2	P42765;A0A0B4J2A4;K7EME0
23.619	24.1404	23.9025	23.8178	24.6258	24.2457	23.8303	0.175592	0.285931	0.364002	NME3	Q13232
[truncated: 2,035 more rows]

## Sheet: LCL_T487I
LFQ intensity Ctrl1	LFQ intensity Ctrl2	LFQ intensity Ctrl3	LFQ intensity Ctrl4	LFQ intensity T487I_1	LFQ intensity T487I_2	LFQ intensity 52_3	LFQ intensity T487I_4	p-value	q-value	Log2FC	Gene names	Majority protein IDs
31.4991	32.2784	32.1375	31.7013	21.7312	20.8775	21.1202	21.7807	2.86709e-08	0	-10.5266	IGHM	A0A1B0GUU9;P01871
29.5862	28.6209	28.5167	28.0707	22.0345	20.0364	20.7715	21.2488	6.56636e-06	0	-7.67581	HLA-A	P10316
29.0238	27.7817	28.0267	28.3158	20.2328	22.1598	21.985	20.7545	1.30538e-05	0	-7.00397		A0A182DWH4
26.5415	25.2471	25.4908	25.5626	20.8979	20.9725	21.7484	20.8478	1.31874e-05	0	-4.59383	HLA-DRB5	Q30154
26.1678	25.7972	25.8477	25.7488	21.3976	21.8021	21.9486	22.221	8.41852e-07	0	-4.04803	PFN2	C9J712;P35080;C9J0J7;C9JQ45;G5E9Q6;C9J2N0
27.1539	27.0835	26.889	26.8718	22.7639	23.1518	23.8793	23.3907	5.12373e-06	0	-3.70314	AIM1	A0A0J9YWL0;Q9Y4K1
25.2714	24.7187	25.7882	25.4694	22.1284	21.5313	22.1636	21.6559	1.64756e-05	0	-3.44213	IGHD	A0A0A0MS09;P01880
24.285	25.2685	24.383	24.3491	21.2414	21.3915	21.5009	21.7595	2.00269e-05	0	-3.09807	HLA-C	Q29865
23.7919	23.6919	23.9341	23.6784	20.5841	20.3625	21.2701	20.8037	5.75837e-06	0	-3.01898	TUBB2A	Q13885
24.7694	24.8442	24.749	24.7874	22.2549	21.6884	21.256	22.0591	1.04866e-05	0	-2.97288	HLA-DQB1	A0A140T9R6;A0A140T8Z5;P01920;A0A140TA15
24.4835	24.7417	25.3388	24.9738	22.2807	21.8404	22.2247	22.116	1.05763e-05	0	-2.76901	BASP1	P80723
25.1233	24.431	25.3633	25.1641	22.3656	22.6964	22.3333	22.6547	3.05819e-05	0	-2.50791	ANXA1	P04083;Q5T3N1
29.3651	29.4983	29.0099	29.1513	27.2725	27.0531	27.0253	27.1705	2.3812e-06	0	-2.12581	HSPB1	P04792;F8WE04
27.6688	27.7188	27.7236	27.7325	25.8015	25.6731	25.6903	26.1051	1.49018e-06	0	-1.89344	BLVRA	P53004
25.0947	24.9529	24.7798	24.5383	22.8608	23.071	23.2869	23.2847	3.51666e-05	0	-1.71554	CTTN	Q14247
27.1837	26.9777	27.2275	26.9869	25.7466	25.5193	25.6622	25.8673	7.48411e-06	0	-1.3951	TYMP	P19971;C9JGI3
28.4592	28.5566	28.6759	28.6627	27.0216	27.2441	27.2588	27.266	1.95323e-06	0	-1.39102	PTK2B	Q14289
27.7049	27.7482	27.6697	27.7376	26.3625	26.3529	26.485	26.4988	8.75742e-08	0	-1.29031	AHNAK	Q09666
28.7834	29.0284	28.9213	28.9987	27.7514	27.6886	27.7215	27.9113	4.07388e-06	0	-1.16477	FDXR	P22570;A0A0C4DFN8;A0A0A0MSZ4;A0A0A0MTR6;A0A0A0MT64;A0A0A0MTN9;A0A0C4DGN7
31.3706	31.2032	31.088	31.1589	30.13	30.0339	30.0926	30.0037	2.50679e-06	0	-1.1401	LGALS1	P09382
25.9304	25.6649	25.8896	25.9202	24.612	24.715	24.7856	24.8575	9.93442e-06	0	-1.10876	F11R	Q9Y624;A0A087WY82
27.3527	27.6316	27.6088	27.4382	26.5263	26.5313	26.4569	26.5082	6.94467e-06	0	-1.00212	HLA-DPB1	Q5EP54;A0A182DWF4;A0A182DWG2;A0A182DWF5;A0A140T8Z3;A0A140T8Z7;A0A140T9P7
29.0881	29.4211	29.2305	29.1563	28.366	28.2487	28.1776	28.2093	2.28604e-05	0	-0.973617	HSD17B10	Q99714;Q5H928
31.0243	30.9721	31.0136	31.0421	29.9537	30.1481	30.1381	30.1683	2.22354e-06	0	-0.911025	FLNA	Q60FE5;P21333;Q5HY54;A0A087WWY3
29.2938	29.3283	29.1213	29.2734	28.4207	28.3623	28.4414	28.2025	1.48007e-05	0	-0.89746	GRHPR	Q9UBQ7;U3KQ56
26.397	26.4577	26.4346	26.3765	25.7307	25.4957	25.5291	25.419	1.48863e-05	0	-0.872793	FAH	P16930
30.1239	30.1952	30.1828	30.2122	29.3743	29.4523	29.5063	29.5498	2.95307e-06	0	-0.707825	MYO1G	B0I1T2
29.6039	29.7296	29.6273	29.5379	28.9313	29.0157	28.9926	29.1141	3.15477e-05	0	-0.61128	TFRC	P02786;G3V0E5
33.4797	33.4505	33.3683	33.3176	32.8557	32.8747	32.7823	32.8066	1.08048e-05	0	-0.574166	ANXA6	P08133
33.0154	32.918	32.9767	33.0134	32.6324	32.6757	32.7094	32.6715	3.11234e-05	0	-0.308577	MYH9	P35579
28.999	29.0446	29.0455	29.0571	29.3552	29.4208	29.4757	29.3902	1.22757e-05	0	0.373925	KHSRP	A0A087WTP3;Q92945;M0R0I5
27.4744	27.274	27.4438	27.2499	27.9688	27.9852	28.0252	28.0172	3.67462e-05	0	0.638577	IFIT3	O14879
26.1325	25.9373	25.9669	25.8985	26.6192	26.6733	26.5952	26.6168	2.165e-05	0	0.642321	HERC5	Q9UII4;E9PBL0
26.7082	26.6122	26.4627	26.5761	27.2261	27.258	27.3248	27.1891	2.85215e-05	0	0.65966	CRKL	P46109
28.6824	28.8314	28.7245	28.7005	29.4592	29.4304	29.38	29.4284	1.58706e-06	0	0.689833	MCM6	Q14566
28.7299	28.6455	28.5215	28.8086	29.3367	29.3715	29.4455	29.4223	3.63445e-05	0	0.717638	IL4I1	Q96RQ9
27.321	27.204	27.1457	27.1414	27.8847	27.8138	28.0066	28.038	3.48692e-05	0	0.732738	RRM1	P23921;E9PL69
26.52	26.4633	26.3684	26.459	27.0874	27.3443	27.2242	27.1036	3.51514e-05	0	0.737215	U2SURP	O15042;E7ET15
25.6938	25.8826	25.6948	25.7023	26.4635	26.3585	26.5596	26.5891	3.8646e-05	0	0.749287	PAFAH1B3	Q15102;M0R1K3;M0R389
25.5303	25.3641	25.3545	25.2363	26.159	26.1246	26.1523	26.3348	4.04867e-05	0	0.821404	EED	O75530;E9PJK2
25.8266	26.0863	25.9089	25.9289	26.8083	26.7222	26.8898	26.7605	1.19154e-05	0	0.857566	MAP4K1	K7ER95;Q92918;K7EKT6;K7EJS6
26.816	26.8546	26.7123	26.6487	27.569	27.6944	27.7462	27.7478	6.1227e-06	0	0.93148	PCBD1	P61457
22.6083	22.7787	22.6469	22.7332	23.6493	23.7017	23.4672	23.7009	8.93071e-06	0	0.938005	HDAC3	O15379
25.1249	24.8754	24.9314	24.9554	26.0224	25.8246	26.0111	25.8057	2.12885e-05	0	0.944156	LSM3	P62310
26.0469	26.1766	26.0594	26.1812	27.0445	27.1919	27.0944	27.1543	8.53978e-07	0	1.00521	MSH6	P52701;A0A087WWJ1
23.314	22.9109	23.082	22.8776	24.2425	24.0802	24.2764	24.2555	4.02538e-05	0	1.1675	SUZ12	J3QQW9;Q15022
20.4723	20.5761	20.243	20.1673	21.6605	22.0506	22.0135	21.8656	2.28958e-05	0	1.53288	MEF2B;MEF2BNB-MEF2B	B8ZZJ5;C9J4J4;B3KQ23;H3BNR1;Q02080
26.7628	26.8423	27.047	26.9175	28.326	28.5022	28.4599	28.6596	2.29235e-06	0	1.5945	IFIT1	P09914
20.9202	20.771	21.3616	21.2958	23.1797	22.9262	23.4142	23.5215	3.11963e-05	0	2.1732	PRC1	O43663;H0YM42;H0YL53
21.952	21.1194	20.8897	21.3854	24.0926	24.0674	23.8942	24.1207	2.53191e-05	0	2.70709	DPP4	P27487
21.2983	21.1734	21.2652	20.9598	23.8559	24.6796	24.078	24.5634	5.85603e-06	0	3.12007	PLS3	A0A0A0MSQ0;P13797
21.2625	21.1107	20.9837	21.3871	26.2103	25.9081	25.7161	25.5556	1.34944e-07	0	4.66148	HLA-C	A0A140T9W2;A0A140T9U0;A0A140T9M0;P04222;A0A140T9T1;A0A1W2PNZ7
19.9563	21.1845	21.2028	19.2387	26.3116	26.4313	26.4089	26.1317	1.90359e-05	0	5.92529		A0A182DWE9;A0A140T9T6;A0A140T915;A0A140T9Y2
19.7904	20.7848	20.0778	19.9159	26.4646	27.0336	28.0301	27.8159	2.67139e-06	0	7.19384	HLA-B	P30485
20.1923	20.5399	20.8108	21.2132	27.9492	28.4386	28.4209	27.0882	1.36299e-06	0	7.28516	HLA-DRB1	P13760
22.801	22.5595	22.7658	22.882	21.9805	22.0245	22.0523	21.9949	4.41636e-05	0.000881356	-0.73903	MMGT1	Q8N4V1
22.8978	22.9026	22.7077	23.1041	22.0168	21.9926	22.0521	21.9032	4.40845e-05	0.000896552	-0.911894	SNX11	J3QRB9;J3KTN6;J3QLV8;Q9Y5W9
29.0526	28.8791	28.7914	28.8466	29.7924	29.5813	29.6844	29.6059	4.40593e-05	0.000912281	0.773555	PRDX2	P32119;A6NIW5
28.4797	28.3727	28.2393	28.3743	28.9464	29.047	28.9464	29.0831	4.20607e-05	0.000928571	0.639225	RCC2	Q9P258
26.8446	26.7268	26.8409	26.9739	27.4191	27.335	27.3557	27.47	8.87642e-05	0.00138095	0.548442	MYO18A	A0A0D9SFK2;Q92614
29.6202	29.4949	29.4826	29.1472	27.502	28.1526	27.9553	27.8184	8.8588e-05	0.00139759	-1.57912	RPL7A	P62424;Q5T8U3
27.2323	27.9736	27.001	27.3876	25.2748	25.5361	25.1441	25.2861	8.4187e-05	0.00141463	-2.08836	IGLL5;IGLC1	A0A0B4J231;B9A064;P0CG04
25.0824	26.0707	25.8384	25.6746	23.4835	23.5211	23.6359	23.7584	8.24395e-05	0.0014321	-2.06683	DPP7	Q9UHL4;R4GNE8
24.7039	24.5503	24.6007	24.7469	25.7321	25.4274	25.6053	25.8879	8.16185e-05	0.00145	1.01271	EXOSC10	Q01780
26.6209	26.7561	26.6459	26.6551	25.7619	26.0223	25.9339	26.0841	7.9963e-05	0.00146835	-0.718935	ERLIN2	E5RHW4;O94905
28.7743	28.9533	28.6222	28.9302	29.6486	29.5498	29.6363	29.5442	7.89044e-05	0.00148718	0.774724	PLCG2	P16885;A0A0A0MRF9
21.8391	20.0689	17.6693	17.6127	28.9232	28.9576	29.0403	29.0706	7.83648e-05	0.00150649	9.70043	HLA-DQA1	Q5Y7H0
30.7087	30.6705	30.724	30.7204	31.2922	31.1034	31.2312	31.3659	7.62208e-05	0.00152632	0.542292	ANXA5	P08758;D6RBL5;E9PHT9
28.4119	27.1387	26.3918	28.0795	22.7638	21.2738	20.8024	21.2403	7.58576e-05	0.00154667	-5.9854	HLA-DQB1	A2AAZ0;Q5Y7D6;Q5SU54;E9PIB1
26.2152	26.2787	26.0318	26.067	25.2494	24.9317	25.3042	25.0208	7.54758e-05	0.00156757	-1.02168	PEPD	P12955
27.4222	27.5424	27.6039	27.5648	27.9752	28.0303	28.1004	27.9607	7.33369e-05	0.00158904	0.483338	TCERG1	O14776;G3V220
26.6585	27.027	26.9546	26.8214	27.657	27.6632	27.6377	27.6435	7.04476e-05	0.00161111	0.784961	TTLL12	Q14166
26.2856	26.5241	26.7011	26.5292	25.5808	25.5227	25.6782	25.4541	6.7361e-05	0.0016338	-0.951025	TSTD1	Q8NFU3;R4GNF9
25.5347	25.5702	25.5916	25.6131	25.8593	25.9433	25.9901	25.8758	6.50445e-05	0.00165714	0.339721	RFC5	P40937
28.9323	28.8032	28.9514	28.8806	27.2606	27.8218	27.679	27.3355	6.26848e-05	0.00168116	-1.36766	RPL24	C9JXB8;C9JNW5;P83731
29.1423	29.2219	28.9399	29.0942	29.9262	29.7493	29.7711	29.868	5.58941e-05	0.00170588	0.729065	DHX15	O43143
31.0341	31.1167	31.0709	31.0895	30.5547	30.5227	30.6131	30.722	5.55435e-05	0.00173134	-0.474699	TLN1	Q9Y490
22.6774	22.5364	22.6101	22.8006	23.7188	23.426	23.7623	23.7897	5.54152e-05	0.00175758	1.01809	HAX1	O00165
26.0109	26.0682	25.9945	26.1721	26.5082	26.5011	26.5663	26.615	5.53482e-05	0.00178462	0.486226	AASDHPPT	Q9NRN7;E9PLW6
26.9796	27.6098	27.5499	27.5916	25.664	25.2379	25.4451	25.7293	5.27884e-05	0.0018125	-1.91361	TUBB2B	Q9BVA1
21.1804	21.3272	21.3717	21.359	21.6746	21.8557	21.7247	21.8426	0.000306092	0.00181818	0.464839	VRK3	Q8IV63;M0R073;M0QYA8
26.0577	26.3672	26.1828	26.5325	27.1638	27.2108	27.191	27.5056	0.000292935	0.00183007	0.982744	LCK	P06239;Q573B4;E9PAP0;E9PJ92
28.6352	28.2871	28.4193	28.2757	27.2171	27.2186	27.4667	27.1144	5.03517e-05	0.00184127	-1.15013	ADA	P00813;F5GWI4;F5GXW0
27.6844	27.8153	27.8357	27.6094	28.552	28.2219	28.3882	28.3757	0.000289373	0.00184211	0.648245	PCK2	Q16822;B4DW73;H0YML5;H0YM31;A0A0A0MS74
24.9132	24.9735	24.7924	25.1294	25.7394	25.5992	25.4822	25.6204	0.000288938	0.0018543	0.658195	CLASP1	Q7Z460;F8WA11;H0Y5T1
29.7562	29.5668	29.6288	29.4596	30.1252	30.0967	30.0836	30.0437	0.000280769	0.00186667	0.484465	ANXA4	P09525;Q6P452
30.9987	30.8332	30.7549	30.6029	29.7295	29.7962	29.9449	29.8383	4.81803e-05	0.00187097	-0.97018	RPS16	P62249;M0R210;M0R3H0;M0R1M5
22.0711	22.2259	22.3848	22.1067	22.7331	22.903	23.0124	22.9569	0.00027619	0.00187919	0.704192	KDM5C	P41229
26.415	26.3415	26.2927	26.2212	27.0771	26.7848	27.0193	27.1657	0.000265664	0.00189189	0.69416	SP100	P23497;E9PHV6;C9JBL0
24.0069	24.0057	24.2185	24.3424	25.3024	25.2908	25.1149	25.4794	4.78038e-05	0.00190164	1.15348	SP110	G5E9C0;Q9HB58;E7EM70
27.4671	27.3157	27.2663	27.3291	26.9838	26.9988	27.0097	26.9137	0.000261237	0.00190476	-0.368065	MTCH2	Q9Y6C9
27.7815	27.568	27.862	27.7225	28.2917	28.2915	28.2698	28.1789	0.000242553	0.00191781	0.524481	SMC1A	Q14683;G8JLG1
30.1312	30.297	30.1571	30.141	30.7031	30.5406	30.5896	30.5543	0.000241898	0.00193103	0.41531	SYNCRIP	O60506;B7Z645
25.8476	25.6608	25.5369	25.868	26.6915	26.8322	26.9367	27.0561	4.63448e-05	0.00193333	1.15082	TUBB6	Q9BUF5;K7ESM5
29.5472	29.5332	29.5103	29.6524	28.6749	28.7931	28.9	29.0731	0.00023983	0.00194444	-0.700509	EHD1	Q9H4M9;A0A024R571;C9JC03;C9J2Z4
24.243	24.802	24.439	24.4648	25.3355	25.599	25.6336	25.5628	0.000235102	0.00195804	1.0455	MAP1LC3B;MAP1LC3B2	H3BTL1;Q9GZQ8;A6NCE7;H3BTE7
24.9677	25.2024	25.1057	24.8455	23.3331	23.1561	22.4141	23.4716	0.000233657	0.00197183	-1.9366	PARP4	Q9UKK3
28.7787	28.6389	28.7882	28.704	29.1341	29.1271	29.1467	29.005	0.000232638	0.00198582	0.375736	ANP32A	H0YN26;P39687
25.6711	26.0388	25.9966	26.0655	26.7438	26.6109	26.7252	26.7833	0.000231867	0.002	0.772827	PABPN1	Q86U42;B4DEH8;G3V4T2
24.6357	25.2923	24.9889	24.6357	26.2802	26.1353	26.0776	26.1897	0.000231755	0.00201439	1.28249	ELAC2	Q9BQ52;G5E9D5;E7ES68
29.1866	29.2825	29.1103	29.2931	29.6383	29.6906	29.5499	29.6222	0.000230669	0.00202899	0.407114	ADAR	P55265
32.7526	32.6947	32.7963	32.6045	33.0488	33.0648	33.0177	33.0703	0.000226089	0.0020438	0.338395	HSP90AA1	P07900
27.7982	28.0584	27.9051	27.7831	28.6465	28.5454	28.5827	28.8835	0.000223735	0.00205882	0.778359	PSAT1	Q9Y617
22.3756	20.0777	20.9489	20.2241	25.5012	25.2818	24.9329	25.0064	0.000218991	0.00207407	4.27401	CA2	P00918
25.5088	25.6541	25.5018	25.3997	25.9804	26.0135	25.9164	25.9408	0.000218345	0.00208955	0.446662	SNW1	Q13573;G3V3A4;G3V4X8
27.2889	27.2567	27.2938	27.3182	25.8111	26.0557	25.1079	25.3463	0.000215403	0.00210526	-1.70914	MNDA	P41218
27.5754	27.6875	27.4227	27.5612	28.038	28.2287	28.1043	28.2584	0.00021325	0.00212121	0.595673	NAT10	Q9H0A0;A0A087WV29
28.2709	28.4311	28.1534	28.0114	29.0424	28.9887	28.8985	29.1024	0.000204083	0.0021374	0.791261	MCM2	P49736;H0Y8E6
28.7641	28.9975	28.7039	28.6661	29.3883	29.3516	29.4184	29.4078	0.000198698	0.00215385	0.608631	MCM5	P33992;B1AHB1
26.5469	26.6009	26.6752	26.5026	25.7546	25.6083	25.5167	25.152	0.000198646	0.00217054	-1.07351	DNAJB11	Q9UBS4
28.4753	28.3894	28.3814	28.3579	28.7855	28.7538	28.7123	28.9025	0.000198424	0.0021875	0.3875	SF3A1	Q15459
29.0948	29.1685	29.0369	28.849	28.44	28.2861	28.3655	28.4528	0.000164989	0.0021982	-0.651157	AKR1A1	P14550
28.1114	27.8011	28.0654	27.7833	26.8339	26.2836	26.856	26.6923	0.000195877	0.00220472	-1.27383	CTSH	A0A087X0D5;P09668
24.5542	23.9743	24.0979	23.9136	22.9979	22.378	22.4904	22.7565	0.00032015	0.00220859	-1.47931	HSPB11	Q9Y547;A6NIR2;X6R7Y7
21.6821	22.1913	21.7716	22.0852	23.0352	23.0757	23.2198	23.423	0.000159753	0.00221818	1.25588	GSTCD	Q8NEC7;D6R9W2
28.9254	28.5958	28.4653	28.6131	27.6796	27.5793	27.8212	27.911	0.000317643	0.00222222	-0.902109	S100A4	P26447
28.8268	28.9031	28.7317	28.9873	28.4301	28.3554	28.3906	28.4252	0.000192879	0.00222222	-0.461866	RPL23	P62829;C9JD32;J3KT29;B9ZVP7
25.6254	26.315	26.2366	25.9372	24.5655	24.8905	24.4295	24.3184	0.000316454	0.00223602	-1.47759	SDF2L1	Q9HCN8
29.8093	29.7487	29.8976	29.6405	28.5215	29.0209	28.8513	28.7904	0.000158718	0.00223853	-0.977986	RPL27A	P46776;E9PJD9;E9PLL6;E9PLX7
25.9521	26.1634	26.4652	25.9618	24.9645	24.917	25.1755	24.7788	0.000192417	0.00224	-1.17667	ICAM3	P32942;K7ERN2;K7EP52
30.8636	30.9057	30.9833	30.8099	30.3769	30.5454	30.4953	30.5463	0.000315725	0.00225	-0.399659	PDIA4	P13667
25.0706	25.5333	25.3054	25.4277	26.2038	26.1315	26.1369	26.1361	0.000189707	0.00225806	0.817811	ATM	Q13315;E9PIN0
32.0011	32.1297	32.1328	31.9671	31.5882	31.6244	31.658	31.6994	0.000150252	0.00225926	-0.415218	PDIA3	P30101
29.1035	29.1709	29.116	29.0655	29.4081	29.3276	29.3439	29.4528	0.000309115	0.00226415	0.269114	PRPF8	Q6P2Q9
22.0285	22.1011	22.8016	23.0092	24.774	24.4068	24.6454	24.5211	0.00018856	0.00227642	2.10174	NAPRT	Q6XQN6;G5E977;C9J8U2
26.9264	27.2064	27.1542	26.9785	26.4023	26.5959	26.4628	26.4242	0.000308727	0.00227848	-0.595054	DKC1	O60832;C9IYT0;H7C0M1
27.5705	28.0014	27.5726	27.5763	25.6966	26.1972	26.0021	26.4319	0.000148958	0.00228037	-1.59826	MAN2B1	O00754
27.8131	27.7518	27.78	27.5771	28.1326	28.1044	28.1224	28.1485	0.000308322	0.00229299	0.396468	SEPT1	J3KNL2;Q8WYJ6
29.0008	29.2758	29.1908	29.0742	28.4731	28.5986	28.5615	28.3841	0.00018565	0.00229508	-0.631072	LGALS3	P17931;G3V3R6
31.598	31.6152	31.6612	31.4964	31.0961	31.2358	31.1576	31.2358	0.00014729	0.00230189	-0.411387	RPS3A	P61247;E9PFI5;H0Y9Y4;D6RG13;H0Y8L7;D6RAT0;D6RB09
28.804	28.8035	28.9127	28.7998	29.755	29.4184	29.4975	29.8609	0.00030734	0.00230769	0.802932	PHGDH	O43175;Q5SZU1
26.3751	26.469	26.1872	26.3981	27.2674	27.2733	27.426	27.769	0.000183228	0.00231405	1.07655	IGF2BP3	O00425
26.3298	26.1433	26.1684	26.3663	27.0499	26.7233	26.9144	26.9575	0.000307189	0.00232258	0.659349	POLR2A	A0A087WWE2;P24928
26.0545	25.588	25.4984	25.7932	23.7455	24.3916	24.0752	24.2895	0.000143375	0.00232381	-1.60808	CMBL	Q96DG6
30.5973	30.5019	30.5394	30.6121	30.9311	31.0753	31.0666	31.2068	0.000177447	0.00233333	0.507272	LMNB1	P20700;E9PBF6;A0A0D9SFE5
25.7016	25.6065	25.4757	25.5959	26.0191	26.1821	26.0591	26.096	0.000141667	0.00234615	0.494188	ROCK1	Q13464;A0A0U1RQV4
24.5759	23.7148	24.2463	24.1136	25.8712	25.6725	26.1905	25.813	0.000171895	0.00235294	1.72413	CNN3	Q15417;E9PDU6
30.3193	29.8219	30.0484	29.9913	29.0651	29.0994	29.1476	29.344	0.000335312	0.00236585	-0.881181	HCLS1	P14317;E7EVW7
23.928	22.8855	23.7767	24.2682	26.5094	26.2874	26.1279	26.524	0.000140762	0.00236893	2.64756	TGM2	P21980
28.2497	28.1622	28.214	28.1073	28.7504	28.7075	28.9288	29.0268	0.00017162	0.00237288	0.670083	MCM7	P33993
23.9331	24.0634	23.9452	23.9938	24.9066	24.8874	24.5253	24.8533	0.000140722	0.00239216	0.809284	DNAJC2	Q99543;H7C3L7
31.8063	31.5937	31.7253	31.6245	31.3018	31.2451	31.2676	31.283	0.000170696	0.00239316	-0.413094	STAT1	P42224;J3KPM9
25.7798	26.1095	25.943	25.9132	26.4966	26.5908	26.4909	26.533	0.000169213	0.00241379	0.591468	UTP18	Q9Y5J1
28.5496	28.8276	28.7746	28.6575	29.4041	29.2703	29.2679	29.2765	0.000139853	0.00241584	0.602362	MCM3	P25205;J3KQ69
26.7924	26.6226	26.6777	26.4317	27.2282	27.3486	27.2837	27.2848	0.000168994	0.00243478	0.655216	FAM49B	Q9NUQ9;E5RI16
23.0055	23.274	23.1286	23.0589	23.7883	23.8542	24.1262	23.9068	0.000138049	0.00244	0.802112	GATAD2A	Q86YP4
31.09	30.9369	31.0262	31.0467	30.2796	30.5505	30.5168	30.3524	0.000168051	0.00245614	-0.60014	RPL5	P46777
28.98	29.5378	29.2588	29.258	26.1004	25.9672	24.6679	24.3182	0.000137358	0.00246465	-3.99521	HLA-DQA1	E9PMV2
24.549	24.0855	23.959	24.5382	20.6204	21.473	20.5685	21.9877	0.000167902	0.00247788	-3.12053	ANXA3	P12429;D6RA82
24.0706	24.3734	24.3732	23.874	25.7828	25.333	25.4234	25.6173	0.000134213	0.0024898	1.36635	MPST	P25325;B1AH49
25.5719	26.0185	25.9759	25.9993	26.8596	26.7846	26.8011	26.7486	0.000166206	0.0025	0.907063	GPD2	P43304
23.2996	23.4633	23.3901	24.7584	27.0059	26.835	26.5487	27.0086	0.000133244	0.00251546	3.1217	MAP1B	P46821;D6RA32;D6RA40
26.7292	26.564	26.6335	26.458	25.7888	26.0255	25.7991	25.946	0.00012804	0.00254167	-0.706316	EML4	B5MBZ0;Q9HC35
28.4911	28.6432	28.6484	28.4405	29.0351	29.0078	29.0473	29.0226	0.000119349	0.00256842	0.472394	FEN1	P39748;I3L3E9
24.1354	24.5861	24.0627	23.7876	22.0769	22.4924	22.3983	22.5862	0.000118986	0.00259574	-1.75449	HLA-DQB1	Q29967;A0A0D5XQ77;A0A140T9Y4;A0A140T981;A0A140T9Z9
30.3168	29.9493	30.0785	29.9471	28.891	29.1977	29.124	29.147	0.00011165	0.00262366	-0.98301	RPL23A	H7BY10;K7EJV9;K7ERT8;A8MUS3;P62750
28.4528	28.6956	28.797	28.7423	27.3575	27.2795	27.4553	27.7845	0.000109387	0.00265217	-1.20274	CD74	H0YBZ2;P04233
29.1247	29.5736	29.4897	29.4417	27.988	27.8836	28.14	28.3824	0.000108078	0.00268132	-1.3089	MVP	Q14764
29.1514	29.3504	29.2053	29.3132	28.6828	28.5995	28.6327	28.4163	0.000101928	0.00271111	-0.67225	SRI	C9J0K6;P30626;B4DHQ6
26.083	25.975	25.8366	25.8899	25.3141	24.9621	25.1287	25.063	0.000101755	0.00274157	-0.829154	ATL3	F5H6I7;Q6DD88
27.3098	27.551	27.4224	27.4451	28.2769	28.1729	28.2028	28.5267	9.61087e-05	0.00277273	0.862751	SMCHD1	A6NHR9;J3KTL8
26.9604	27.1539	26.9972	27.0803	26.4612	26.118	26.2679	26.1807	9.53043e-05	0.0028046	-0.790988	RASAL3	Q86YV0
28.5292	28.6508	28.6213	28.6374	29.1144	29.1166	29.1055	28.8924	0.000342492	0.00283636	0.447537	PFAS	O15067
24.1785	23.9232	23.9509	24.0572	23.085	22.7117	23.1513	22.8644	9.23843e-05	0.00283721	-1.07434	MAP3K5	Q99683
31.3593	31.1474	31.0996	31.0524	29.92	30.4329	30.4094	30.2636	0.000551969	0.0028381	-0.908199	RPS4X	P62701
26.9385	26.5475	26.7186	27.0394	27.5317	27.7516	27.6535	27.8919	0.000546363	0.00285167	0.896159	AK4	P27144;D3DQ64
28.4388	28.6665	28.5052	28.5071	27.984	27.8937	28.0044	28.1794	0.00054225	0.00286538	-0.513999	PLEC	Q15149
27.979	28.1949	28.0673	27.9366	28.6114	28.5794	28.5819	28.68	9.19289e-05	0.00287059	0.568702	SUPT16H	Q9Y5B9
22.6535	22.4577	22.7656	22.7486	23.8281	23.3568	23.3712	23.5841	0.000539706	0.00287923	0.878698	NCOA7	Q8NI08
25.8435	26.1034	25.9125	25.9715	25.0285	24.3605	23.9645	24.3847	0.000531652	0.0028932	-1.52318	IGF2R	P11717
25.2857	24.5028	24.5979	24.8745	23.5982	23.3173	23.4927	23.0102	0.000531026	0.00290732	-1.46064	GBP2	P32456
23.7178	23.7531	23.7192	23.8893	23.2405	23.0402	22.7632	22.7804	0.000526996	0.00292157	-0.813788	STOM	P27105
25.3616	24.9956	25.3295	25.117	23.9756	23.8308	24.0787	24.4818	0.000521667	0.00293596	-1.10917	CD47	Q08722
29.8422	29.8828	30.123	30.1193	29.2733	29.3857	29.1107	28.9563	0.00052076	0.0029505	-0.810319	RPL10A	P62906
25.6075	25.6343	25.367	25.3259	26.0515	26.3194	26.2365	26.4521	0.000516859	0.00296517	0.781212	SYK	P43405
28.8152	28.8104	28.8367	28.8626	29.1715	29.0825	29.1012	29.2924	0.000515598	0.00298	0.330692	ELAVL1	Q15717
24.1264	24.9988	25.1729	24.9288	26.4535	26.808	26.3484	26.4596	0.000512457	0.00299497	1.71066	AKAP2	Q9Y2D5;C9JVY5
28.1488	27.8043	27.8439	27.9033	27.0065	27.1916	27.377	27.1865	0.000498341	0.0030101	-0.73468	EFHD2	Q96C19;H0Y4Y4
27.8929	28.0775	27.8148	27.8494	27.4533	27.4621	27.5075	27.5348	0.000492394	0.00302538	-0.41923	ALDH9A1	P49189
28.2699	28.0085	28.1066	28.1457	28.5042	28.7445	28.5999	28.6218	0.000572281	0.00303704	0.484916	RBM14	Q96PK6
25.1762	26.4302	26.2615	26.2665	27.9216	28.0214	28.0205	28.1915	0.000486378	0.00304082	2.00514	SERPINB1	P30740
28.2498	28.2644	28.1364	27.9995	28.6141	28.6123	28.6495	28.8059	0.000571178	0.00305116	0.50789	SSRP1	Q08945
25.215	25.11	25.4655	24.6161	26.5587	26.6869	26.336	26.3258	0.000452542	0.00305641	1.37517	CD38	P28907
22.6871	22.8476	22.8877	22.8557	23.3084	23.1634	23.1967	23.3753	0.000569214	0.00306542	0.441424	CNOT2	F8VV52;Q9NZN8;H0YI11;H0YH84;F8VRS8;F8W145;F8VP97
29.2436	29.5457	29.3351	29.3461	28.7766	28.8829	28.8868	28.9353	0.000452419	0.00307216	-0.497251	CAPN1	P07384
23.0861	23.3242	23.181	23.2425	23.9065	24.2285	24.1247	24.5915	0.000568512	0.00307981	1.00434	METTL16	Q86W50
30.4279	30.4672	30.3097	30.3358	29.5561	29.942	29.7426	29.8264	0.000451836	0.00308808	-0.618346	MDH1	P40925;B9A041;B8ZZ51;C9JF79
24.4779	26.4336	24.9159	25.4475	22.4979	21.76	21.2892	20.7173	0.000562706	0.00309434	-3.75262	ISOC2	Q96AB3;K7EKW4;K7ENV7
26.8694	25.8058	26.3963	26.268	22.9866	24.4908	23.334	23.0523	0.000438811	0.00310417	-2.86896	COX7B	P24311
30.4962	29.896	30.0396	29.8464	27.5993	28.5523	28.4453	28.4996	0.000560556	0.003109	-1.79541	RPL6	Q02878
25.0427	25.6864	25.7882	25.652	24.2438	24.2732	24.0283	24.3508	0.000357929	0.00311111	-1.3183	PSMB5	P28074
23.6789	24.1793	24.0313	23.9561	23.0735	22.6712	22.9893	23.1004	0.000436863	0.00312042	-1.00278	ABCC1	A0A0A0MS99;I3L4X2;P33527
22.3414	20.0063	21.87	20.3117	24.9673	25.9357	25.6817	25.5863	0.000352705	0.00312941	4.41041	HLA-DRB4	X5D2U9;P13762;A0A0G2JJQ8
25.9399	25.2903	25.5135	26.2599	24.268	24.1812	24.1887	24.2685	0.000425947	0.00313684	-1.52428	hCG_2014768;TMA7	A0A024R1R8;Q9Y2S6
26.1299	26.1628	26.3986	26.2288	24.7095	25.0189	25.1675	25.415	0.000352165	0.00314793	-1.15229	PAK1	Q13153;E9PM17;B3KNX7
26.1158	25.876	25.6852	25.6429	24.7286	24.9525	25.0875	24.8756	0.000425398	0.00315344	-0.918975	CASP1	G3V169;P29466;B4DVD8
29.3392	29.4034	29.1026	29.1576	29.8105	29.8821	29.8199	30.0279	0.000350691	0.00316667	0.634397	SNRPN;SNRPB	J3QLE5;P63162;P14678;J3KRY3;S4R3P3
22.7587	22.7551	22.8441	22.807	23.4974	23.7647	23.9732	24.2076	0.00042142	0.00317021	1.06949	C2CD5	Q86YS7
24.7792	24.7609	25.1647	24.8276	22.772	23.3129	23.7588	23.1934	0.000350284	0.00318563	-1.62385	TRPV2	Q9Y5S1;H7BZK2
26.9099	26.607	26.6385	26.9108	27.5923	27.3535	27.5876	27.729	0.000421336	0.00318717	0.799088	SCRN1	Q12765
26.2023	26.208	26.3198	26.1472	26.5848	26.8024	26.6351	26.8272	0.000418436	0.0032043	0.493044	NUP98	P52948;H7C3P6
26.7573	26.7007	26.6137	26.6521	26.9764	27.0999	27.0261	27.1755	0.000345105	0.00320482	0.38851	FLNB	O75369;E7EN95
29.8949	29.9246	30.0444	30.0996	28.7112	29.2653	28.9952	29.2734	0.000606497	0.00321076	-0.929607	RPL26	J3QRI7;J3QQQ9;J3QQV1;J3QRC4;P61254;J3KTJ8
23.1524	23.3998	23.4796	23.5865	24.3249	24.4313	24.3326	24.8418	0.000410284	0.00322162	1.07807	THOC6	Q86W42
27.0253	27.077	27.1114	27.2052	27.4366	27.6393	27.4547	27.4704	0.000599319	0.00322523	0.395533	HK2	P52789;E9PB90
25.1587	25.0644	24.7081	25.4466	23.8472	23.5367	23.2446	23.8426	0.000409162	0.00323913	-1.47668	CHDH	Q8NE62
28.0482	28.1242	28.0395	28.1183	27.5748	27.4651	27.6644	27.7791	0.000599217	0.00323982	-0.461682	STAT3	P40763;G8JLH9
24.9048	25.1323	24.7837	25.0884	25.8887	25.7723	25.6429	25.5367	0.00059795	0.00325455	0.732821	ZNF318	Q5VUA4
22.1583	22.2478	22.0497	22.3849	23.3644	23.9895	24.2972	23.5309	0.000405194	0.00325683	1.58533	PARP2	G3V167;Q9UGN5;H0YH02
28.0313	28.1277	28.2091	28.0599	27.5407	27.5863	27.5289	27.8012	0.000589943	0.00326941	-0.492724	NSF	I3L0N3;P46459
27.9718	28.0214	27.7954	28.0011	26.6235	27.1721	26.6067	27.0393	0.000393552	0.00327473	-1.08706	RPL37A	P61513;C9J4Z3;Q6P4E4;E9PEL3;G5E9R3;M0R0A1;M0R2L6
28.4993	28.8345	28.7836	28.621	29.1642	29.3208	29.2611	29.2044	0.000588576	0.0032844	0.553025	MCM4	P33991
25.3426	24.9464	24.7641	25.5512	26.87	26.3604	26.7053	26.9267	0.000392958	0.00329282	1.5645	UAP1L1	Q3KQV9
30.7169	30.1284	30.2965	30.2192	28.9998	29.4622	29.3567	29.1681	0.000579481	0.00329954	-1.09354	RPL13A;RPL13a	P40429;M0QYS1;Q8J015
29.49	29.8021	29.78	29.5897	28.9618	29.1121	28.9535	28.7916	0.000387684	0.00331111	-0.710699	SLC25A3	Q00325
24.9377	25.1915	25.1219	25.0775	24.7188	24.6258	24.6213	24.6898	0.000385201	0.00332961	-0.418246	ZYX	H0Y2Y8;Q15942;C9IZ41
30.1872	30.1632	29.9924	30.0947	30.402	30.4348	30.4858	30.4727	0.000381874	0.00334831	0.339452	ACLY	P53396
29.7624	29.2255	29.5926	29.4733	27.7636	28.3952	28.3046	28.3228	0.000377926	0.00336723	-1.31692	RPL18A	Q02543;M0R117;M0R3D6;M0R1A7;M0R0P7
26.9544	26.9176	27.0984	26.9559	26.2455	26.2603	26.5822	26.3005	0.000376637	0.00338636	-0.634458	SEMA7A	O75326;F5GYX3
30.7257	30.7425	30.8234	30.6961	29.3793	29.9393	29.9629	29.7681	0.000375877	0.00340571	-0.984513	RPS11	P62280;M0QZC5
29.2982	29.4082	29.1454	29.1813	27.3886	27.936	28.0615	28.2146	0.000371758	0.00342529	-1.35812	RPS13	P62277
29.7636	29.8518	29.8268	29.8498	29.5523	29.5301	29.6225	29.6361	0.00037083	0.00344509	-0.237726	ACO2	A2A274;Q99798
30.0728	29.4335	29.5814	29.2609	27.1006	27.9638	27.9622	27.4245	0.000370606	0.00346512	-1.97437	RPL18	Q07020;G3V203;J3QQ67;H0YHA7;F8VUA6;F8VYV2
23.3393	23.2313	23.2204	23.5476	24.8244	24.5577	24.9937	24.153	0.000609411	0.00348214	1.29758	GSTT1	P30711;A0A0G2JRQ5
21.0727	21.0695	21.2229	21.4269	21.8228	21.9617	22.2857	22.0551	0.000645024	0.00354978	0.833304	C9orf41	Q5T8U9;Q5T8V1;Q8N4J0
24.9222	24.9506	25.1065	25.169	25.593	25.5751	25.4892	25.8013	0.000644983	0.00356522	0.577564	CYBB	P04839
24.3188	24.9125	24.7707	24.4743	25.4164	25.7253	25.8326	25.7335	0.000631639	0.00358079	1.05785	TLE3	F5H7D6
21.5314	19.8269	20.3245	20.6843	22.9991	23.6183	23.0045	22.9639	0.000624064	0.00359649	2.55467	HLA-B	Q31610
28.1426	27.8113	27.7938	28.0765	26.896	26.8081	27.1872	27.2546	0.000621397	0.00361233	-0.919578	NCF2	P19878
27.5863	27.6074	27.6913	27.6781	27.4063	27.3614	27.2407	27.3815	0.000618423	0.00362832	-0.293296	PACSIN2	Q9UNF0;A0A0U1RR22
24.3842	23.9877	24.1161	24.3745	25.7393	25.1624	25.2836	25.1394	0.00061312	0.00364444	1.11552	LRMP	F8W9L6;A0A1B0GU45;Q12912;F5H006
30.9757	30.7596	30.8692	30.7525	31.2265	31.1748	31.2181	31.1609	0.000655381	0.00387931	0.355827	SERPINB9	P50453
30.1885	29.994	30.036	29.9393	28.1565	28.9792	28.8773	28.9405	0.000667762	0.004103	-1.30106	RPL27	P61353;K7ELC7;K7EQQ9
24.8857	24.6651	24.8889	24.8349	24.3689	24.332	24.4931	24.27	0.000679598	0.00432203	-0.452665	STAMBP	O95630;C9JK83
28.332	27.9559	28.0758	28.0572	28.7081	29.0648	28.849	28.7326	0.000672509	0.00434043	0.733381	DAZAP1	K7EQ55;K7EK33;Q96EP5;K7EQ02
26.3962	26.0428	25.8769	25.5421	24.7249	24.1566	24.7448	24.4413	0.000672186	0.00435897	-1.44757	HVCN1	Q96D96
24.6763	23.4345	23.7283	23.6224	25.7699	25.7583	25.5769	26.2045	0.000695984	0.00439834	1.96202	FABP3	S4R371;P05413;S4R3A2
19.9959	21.1894	20.989	20.9742	22.7209	22.735	22.5882	22.3426	0.000692384	0.00441667	1.80953	TBC1D10B	Q4KMP7
26.3319	26.679	26.8565	26.4616	25.7674	25.7724	25.3862	25.4541	0.00069152	0.00443515	-0.987212	FKBP2	P26885;F5H0N4
26.1616	25.6834	25.5005	25.9525	23.9692	24.5545	23.3699	23.4396	0.000688374	0.00445378	-1.9912	RHOC	Q5JR08;P08134;E9PQH6;Q5JR07;Q5JR05
25.1012	24.6782	24.8803	24.8942	25.6052	25.5826	25.7927	26.0296	0.000684007	0.00447257	0.864066	PGM3	O95394;A0A087WT27;J3KN95
31.0984	30.7096	30.8633	30.7582	30.0805	30.2001	30.2166	29.8502	0.000702126	0.00462551	-0.770519	CALR	P27797;K7EJB9
29.438	29.5994	29.4899	29.4682	29.9064	29.7414	29.8731	29.9592	0.000700672	0.00464463	0.371156	GLO1	Q04760
29.214	28.4644	28.7176	28.5654	27.5667	27.6528	27.7539	27.4161	0.000735668	0.00482927	-1.14295	RPL14	P50914;E7EPB3
30.1215	29.6268	29.5909	29.8513	28.9241	29.097	28.9837	28.9205	0.000731774	0.00484898	-0.816306	GBE1	Q04446;E9PGM4
27.8527	28.589	28.4783	28.3655	26.2368	27.0743	26.9176	26.8213	0.000703915	0.00486885	-1.55888	RPL34	P49207
27.9661	28.0925	28.2294	28.0271	28.5523	28.8193	28.7643	28.5236	0.000760217	0.00512	0.586047	CPNE3	O75131;A0A087WYQ3
30.6435	30.1946	30.2259	30.1009	27.9077	28.8579	28.893	28.9744	0.00109212	0.00513311	-1.63298	RPL8	P62917;E9PKZ0;E9PKU4;G3V1A1;E9PP36
29.2193	29.4276	29.3103	29.1909	29.6358	29.6234	29.6276	29.5782	0.000964114	0.00513455	0.329225	SNRNP200	O75643
20.4288	20.7434	20.5591	20.4882	20.1046	19.9542	20.1202	20.0786	0.000752213	0.00514056	-0.490456	RXRB	A0A0G2JKR7;P28702
25.1922	25.0283	25.1832	25.0485	25.7673	25.432	25.6928	25.8207	0.00109162	0.00515068	0.56514	MRPL19	P49406;S4R3W9;A0A0A0MRF4
28.3941	28.6079	28.5281	28.218	27.3101	27.2403	27.2537	27.8542	0.000959734	0.00515328	-1.02246	RPS24	E7ETK0;A0A087WUS0;P62847
30.5541	30.3862	30.6301	30.5132	29.8492	30.0235	30.0018	30.1585	0.00074334	0.00516129	-0.512642	RPS19	P39019;A0A075B6E2
20.2384	20.1813	19.9128	20.2154	21.1957	20.9068	20.6551	21.0884	0.0010783	0.00516838	0.824523	ECD	O95905
28.2724	28.3795	28.5865	28.4494	27.8644	28.062	27.9629	27.9341	0.000955819	0.00517216	-0.466088	ARPC1B	O15143
26.8217	26.3737	26.7966	26.6668	27.4492	27.5766	27.6661	27.287	0.000742932	0.00518219	0.83004	DUT	P33316;H0YNW5;A0A0C4DGL3;H0YKC5;H0YKI0
31.999	31.737	31.7259	31.7923	32.1952	32.3189	32.2939	32.1696	0.00107024	0.00518621	0.430827	NPM1	P06748
29.5852	30.2189	30.0711	29.7461	29.0977	28.8297	28.9694	28.9665	0.000925494	0.00519118	-0.93951	HYOU1	A0A087X054;Q9Y4L1;E9PJ21;A0A087WWI4;K7EQK2
24.9242	23.8678	22.8166	24.4169	21.2131	20.9385	21.2189	21.373	0.000864698	0.00520301	-2.82048	SERPINB10	P48595
27.0401	27.2309	27.0699	27.2544	26.8305	26.6791	26.8142	26.7396	0.00105908	0.00520415	-0.38297	HIBCH	Q6NVY1
31.0037	30.9394	30.978	31.2398	29.3297	30.0826	29.9523	29.1973	0.000917943	0.00521033	-1.39977	HLA-DRB1	P20039
25.9748	26.126	25.675	25.8419	27.6346	26.9842	26.9403	26.8556	0.00104893	0.00522222	1.19925	PLEKHA2	A0A087WZ32;A8K727;Q9HB19;A0A087X038
29.2608	28.9118	28.7799	28.8536	26.9111	27.6656	27.7729	27.7584	0.000864052	0.00522264	-1.42454	RPL35	P42766;F2Z388
29.0493	29.2402	29.1342	29.0988	29.4274	29.3569	29.4931	29.4635	0.0008886	0.00522963	0.304608	TARS	P26639
24.8836	25.0676	24.8479	24.9824	25.6972	25.7142	25.4326	26.0196	0.00102428	0.00524042	0.770561	ACACA	Q13085;Q59FY4
26.0032	26.3033	26.0934	26.1427	26.6974	26.6748	26.614	26.951	0.000849682	0.00524242	0.598642	FUBP3	Q96I24
22.0389	22.0533	22.1602	22.4391	22.7791	23.1817	23.3003	23.368	0.000878959	0.00524907	0.984431	ZMYM3	A6NHN7;A6NHB5;Q14202
30.3606	30.4786	30.3941	30.2741	29.7782	30.0291	29.9509	30.0259	0.00100869	0.00525874	-0.430798	WDR1	O75083;D6RD66
27.1806	27.389	27.2932	27.282	27.7518	27.6104	27.6349	27.8339	0.00077153	0.00525896	0.421522	TOP2B	Q02880;E9PCY5
28.7855	28.3246	28.4825	28.6068	27.8711	27.9508	27.656	27.8667	0.000849413	0.00526236	-0.713715	TOP1	P11387
25.68	25.6474	26.044	26.0176	24.8299	25.213	25.0139	24.7721	0.000877567	0.00526866	-0.890077	CORO1B	Q9BR76
25.7537	26.2034	26.0609	25.8347	26.5952	26.7318	26.6786	26.5287	0.000997352	0.00527719	0.670398	RNPS1	H3BV80;H3BMM9;H3BTC0;Q15287;H3BPG5;H3BMS0
27.2346	27.1884	27.2607	27.1979	27.5873	27.3913	27.5965	27.5602	0.000845093	0.00528244	0.313423	BTK	Q06187;U3NG26;Q5JY90
25.8832	25.894	26.0242	25.7758	25.4023	25.3034	25.4585	25.5696	0.000871206	0.00528839	-0.460844	HSDL2	Q6YN16
27.6232	27.7364	27.7763	27.8559	28.3345	28.1617	28.2893	28.5764	0.000994774	0.00529577	0.592505	CHD4	F5GWX5;A0A0C4DGG9;Q14839
30.4342	29.8821	30.071	29.6198	28.4692	28.6032	28.9661	28.9806	0.00113749	0.0052973	-1.247	RPL35A	P18077;C9K025;F8WBS5;F8WB72
27.9871	28.1244	28.1059	28.1722	28.5898	28.3526	28.5596	28.5798	0.000839863	0.00530268	0.423059	USP7	Q93009;H3BND8
22.4317	22.8027	22.562	22.2718	23.5226	23.1744	23.7076	23.724	0.000988589	0.00531449	1.0151	TSR2	Q969E8
31.4544	31.2934	31.3268	31.5322	30.8797	30.8073	30.8108	30.4362	0.00113456	0.00531525	-0.668196	FSCN1	Q16658
27.3102	27.3888	27.2521	27.3173	26.7659	26.6547	26.9183	26.9808	0.000832029	0.00532308	-0.487152	LACTB	P83111
27.2486	27.2731	27.5269	27.1988	27.7244	27.7523	27.7861	27.7655	0.000982557	0.00533333	0.445213	HNRNPH3	P31942
25.1516	24.7147	25.0234	24.1473	26.0239	26.0161	26.1858	26.3523	0.00111461	0.00533333	1.38529	CLIC4	Q9Y696
26.3556	26.3157	26.2925	26.4952	26.691	26.8404	26.6615	26.7768	0.000819936	0.00534363	0.377675	RAD23B	P54727;Q5W0S5
26.637	26.8185	26.6839	26.4513	25.7873	25.8545	25.3324	25.9252	0.000966174	0.00534783	-0.922803	CBR1	P16152
36.2918	36.3692	36.1624	36.1875	35.8929	35.9753	35.7862	35.8815	0.000973273	0.00535231	-0.368753	ACTB	P60709
23.5426	23.785	23.9777	23.7629	24.6968	24.4773	24.5832	25.0369	0.00081885	0.00536434	0.931502	STK24	B4DR80;Q9Y6E0;H0Y630
22.0183	22.0161	22.0527	21.8532	22.5316	22.73	22.7066	22.3493	0.000972717	0.00537143	0.594319	SCRN2	J3QL71;Q96FV2
25.3806	25.1297	24.8391	25.1609	25.8306	25.8205	25.7807	25.8767	0.000814825	0.00538521	0.699551	SYMPK	Q92797;A0A087WUE9
24.9589	25.1955	25.3146	25.1569	25.8295	25.8771	25.9824	26.3705	0.000972549	0.00539068	0.858445	SYAP1	Q96A49
24.5805	24.1238	24.3033	24.5252	22.8019	23.552	22.6264	22.8841	0.000805525	0.00540625	-1.41712	CYB5R1	Q9UHQ9;H7C0R7
25.1331	25.6177	25.7198	25.245	26.3391	26.232	26.3045	26.4993	0.000972117	0.00541007	0.914855	ME1	P48163
25.1958	25.2274	25.3583	24.8523	24.0498	24.3008	24.0546	24.4843	0.00080341	0.00542745	-0.936087	RRP1B	Q14684
27.4375	27.4459	27.7534	27.5219	26.8153	26.9837	27.1037	26.9877	0.000971774	0.0054296	-0.567075	CNN2	B4DDF4;B4DUT8;Q99439;A0A087X1X5;A0A087X271;H3BVI6
29.4164	29.5228	29.4716	29.4595	29.9342	29.837	29.843	29.6795	0.000799781	0.00544882	0.355861	PAICS	P22234;E9PBS1;D6RF62
27.3916	27.1513	27.3946	27.3805	27.9405	27.7873	27.7148	27.953	0.000792803	0.00547036	0.519365	SNRPB2	P08579
26.789	26.8873	27.0675	27.0879	27.4412	27.3794	27.4689	27.5546	0.000792441	0.00549206	0.503082	DNAJC8	O75937
26.3584	26.5312	26.433	26.1668	26.9615	26.8174	27.1395	27.1654	0.00117483	0.00549333	0.648582	CELF1	G5EA30;Q92879
28.5862	28.6074	28.4392	28.4511	28.8693	28.842	28.9792	29.1025	0.00117122	0.00551171	0.42726	EIF2AK2	P19525
26.8344	26.3871	26.3222	26.425	25.4933	25.8511	25.7538	25.6247	0.00114181	0.0055302	-0.811442	HP1BP3	Q5SSJ5;B0QZK4;X6RGJ2;Q5SWC8
23.4152	23.4758	23.2878	23.5224	23.1268	23.0217	23.1379	23.0853	0.00114109	0.00554882	-0.332396	NUDT16	Q96DE0
29.8022	29.7864	29.8907	29.6808	30.1281	30.017	30.2034	30.1703	0.00121376	0.00566887	0.339695	HNRNPL	P14866;M0QXS5
24.0257	23.9302	23.8816	24.2244	23.5206	23.5758	23.2967	23.4327	0.00120376	0.00568771	-0.559023	NIFK	Q9BYG3;C9J6C5
27.3986	27.4049	27.5709	27.6999	27.0675	27.0557	26.9865	26.7996	0.00128047	0.00569231	-0.541243	CD70	P32970
28.3997	28.1562	28.3148	28.1806	28.5764	28.8064	28.8129	28.8993	0.00127695	0.00571061	0.510893	EIF4A3	P38919
27.8029	28.2492	28.1268	28.007	28.6643	28.7218	28.5368	28.6064	0.00127333	0.00572903	0.585821	DPYSL2	Q16555;A0A1C7CYX9
23.5647	23.5221	23.438	23.4129	23.8222	23.9775	24.2335	24.1585	0.00127103	0.00574757	0.563549	NUDT9	Q9BW91;H7C386;D6RAW2
31.2861	30.8502	31.049	30.7152	29.2842	30.0549	29.9647	29.7563	0.00125835	0.00576623	-1.21013	RPL3	P39023;G5E9G0;H7C422;H7C3M2
26.1834	26.4965	26.5936	26.2615	26.9964	26.9084	26.9118	26.994	0.00124825	0.00578502	0.568855	ILK	A0A0A0MTH3;Q13418
25.4473	25.5243	25.4855	25.5439	25.1765	25.0376	25.0115	24.763	0.00129073	0.00578914	-0.503059	ATAD1	Q8NBU5
23.7494	23.36	24.1938	24.0614	22.4092	22.6543	22.7567	22.0824	0.00123211	0.00580392	-1.36549	PPT1	E9PMG2;P50897;Q5T0S4;E9PIA8
23.5035	23.4957	23.6984	23.8166	24.2076	24.2554	24.3288	24.6565	0.00122399	0.00582295	0.733563	ANKRD13A	Q8IZ07;H0YIN8
29.0201	29.0553	29.1583	29.2016	28.8421	28.8121	28.7654	28.6536	0.00122265	0.00584211	-0.34052	FH	P07954
23.6319	23.5529	23.3746	23.3597	24.096	24.0115	24.1889	23.8566	0.00121754	0.00586139	0.558491	LCMT1	Q9UIC8;I3L4A2
30.8432	31.095	30.9596	31.2895	31.5632	31.645	31.5596	31.6082	0.00140158	0.00589728	0.547153	VIM	P08670;B0YJC4
28.4157	28.3376	28.3472	28.1841	27.8242	27.78	27.9834	28.0109	0.00138467	0.00591515	-0.421525	CAPNS1	A0A0C4DGQ5;P04632;K7ELJ7;K7EIV0;A0A075B7C0;U3KQE2;K7EM73;K7EKD8;U3KPR7
27.175	26.5593	26.8241	26.8423	24.5949	25.7359	25.1497	25.5461	0.00131615	0.00593103	-1.59354	RSL1D1	O76021;I3L3U9;J3QSV6;I3L3C4
27.3748	27.3966	27.4703	27.502	27.8404	27.7048	27.8014	28.0195	0.00137315	0.00593313	0.405583	PSPC1	Q8WXF1;X6RDA4
24.3167	24.8654	24.8971	24.4877	26.0408	25.775	25.8643	25.3695	0.00142893	0.00594627	1.12063	RB1	P06400
31.7374	31.1958	31.3126	31.2417	29.7612	30.3899	30.2902	30.47	0.00131595	0.00594969	-1.14408	RPS9	A0A024R4M0;P46781;B5MCT8;C9JM19
24.751	22.8305	25.7116	24.9383	20.4047	21.6309	20.0799	20.3498	0.00137197	0.00595122	-3.94151	UBA52	P62987;M0R2S1;M0R1M6
22.2817	22.4794	22.4239	22.4618	23.6436	22.9336	23.5128	23.7588	0.00142135	0.00596407	1.05048	APOL3	O95236
25.1648	24.9596	25.1982	24.8701	25.7614	25.4482	25.6483	25.6806	0.00130608	0.00596845	0.586466	PELP1	C9JFV4;Q8IZL8;E7EV54;I3L445
26.6555	26.9284	26.7466	26.7798	25.7893	25.8305	26.3226	25.657	0.00136292	0.00596942	-0.877751	ITGB2	P05107;D3DSM0;J3KNI6
20.037	21.9469	21.9588	22.0263	24.8722	23.9739	24.2053	24.8015	0.00142081	0.00598198	2.97096	GINS3	Q9BRX5
25.3873	25.3048	25.5679	25.7494	26.2156	26.368	26.0289	26.1506	0.00130517	0.00598734	0.688406	CHD2	O14647;A0A1B0GTU9
26.9237	27.3493	27.4017	27.2367	26.2687	26.5225	26.2695	25.8336	0.00135582	0.00598773	-1.00424	ENTPD1	P49961
26.2398	26.5282	26.4938	26.5958	26.8942	26.8966	26.8905	26.985	0.00141115	0.006	0.452195	TIMM44	O43615;M0QXU7
24.7534	24.8559	24.7189	24.7917	25.8476	25.3357	25.8261	26.2134	0.00135548	0.00600615	1.0257	VRK1	Q99986;H0YJ50
28.8602	28.3445	28.5589	28.756	26.5215	27.4278	27.4313	27.4123	0.00130057	0.00600635	-1.43168	RPL28	H0YKD8;P46779;H0YMF4;H0YLP6
27.2666	27.6691	27.6868	27.5405	26.9459	26.766	26.9427	27.0169	0.00135188	0.00602469	-0.622886	MACF1	Q9UPN3;H0Y390
23.9518	22.9865	23.3037	23.0377	24.9029	25.1133	24.4353	24.7982	0.00129521	0.00602548	1.49251	CRYM	Q14894;I3NI53;I3L2W5;I3L325
30.0318	30.0482	30.0877	30.0037	29.7625	29.9071	29.7706	29.8548	0.0013456	0.00604334	-0.219082	COPA	P53621
25.4412	25.6614	25.5443	25.6679	26.3387	26.1299	26.2347	26.7112	0.00134085	0.00606211	0.774928	RPIA	P49247
28.2203	28.3477	28.2104	28.1677	27.9551	27.7682	27.9753	27.8642	0.001326	0.006081	-0.345834	ACSL1	E7EPM6;P33121;B7Z3Z9
25.2446	24.6043	24.724	24.6966	23.7271	23.9153	23.2947	23.1617	0.00132597	0.0061	-1.29264	POGLUT1	Q8NBL1;H7C5H0;F8WEW4;B4DVA9
30.4165	30.335	30.2328	30.1099	29.4478	29.8926	29.4506	29.494	0.00143691	0.00611905	-0.702293	RPS14	P62263;E5RH77;H0YB22
28.1426	27.8376	28.3263	28.0405	25.2601	26.2556	26.604	26.6734	0.00147093	0.00630088	-1.88845	RPL29	P47914
26.0853	26.4754	26.2703	26.4885	27.3509	26.9119	27.0027	27.0441	0.00146003	0.00631953	0.747528	TRA2A	Q13595
26.3205	26.0642	25.8442	26.3985	23.1673	21.029	23.217	23.7038	0.00145231	0.00633828	-3.37759	PLA2G4A	P47712
26.2943	26.5282	26.4617	26.3591	26.9666	26.6951	26.8171	26.849	0.00149546	0.00647507	0.421143	SF3A2	Q15428
24.278	24.416	24.1206	24.1291	23.7413	23.6825	23.4035	23.3006	0.00149148	0.00649412	-0.703944	SCO2	O43819
22.727	22.3377	22.8289	22.8774	23.3476	23.4347	23.3974	23.3307	0.0015262	0.00660058	0.684828	SIRT6	Q8N6T7;M0R1N9
30.5761	29.6347	29.7941	29.5655	27.4679	28.3348	28.4785	28.2381	0.00161426	0.00661364	-1.76278	RPL13	P26373;J3QSB4
22.7948	23.2869	23.934	24.0611	25.0957	25.3197	25.0799	25.1924	0.00150547	0.00661988	1.65272	PFKFB4	Q66S35;Q16877;C9K0D8
22.8392	23.0047	22.8847	23.1042	23.8204	23.3403	23.561	23.6279	0.0016069	0.00663248	0.629194	PPP3CC	P48454;G3V111
22.7701	24.9298	24.3251	25.0981	20.7889	21.823	20.2238	20.8672	0.00172028	0.00664804	-3.35506	HLA-DMB	A0A0G2JIJ2;A0A0G2JI43;P28068;F6UB75;A0A140T9U6;A0A140T9T8;A0A140T9R2;A0A140T9R0;A0A140T9I2;A0A140T9C9;A0A140T926
31.712	31.623	31.6093	31.5881	31.1038	31.3783	31.2833	31.331	0.00159081	0.00665143	-0.359043	P4HB	P07237;H7BZ94;H0Y3Z3
28.4954	29.0042	28.9398	28.7812	29.3435	29.4527	29.4708	29.5296	0.00170752	0.00666667	0.643968	RNF213	A0A0A0MTR7;A0A0A0MTC1;Q63HN8
29.5148	29.1965	29.4762	29.3427	28.9794	29.0022	29.0014	28.9398	0.00157441	0.00667049	-0.401827	PEBP1	P30086
28.63	28.7035	28.8255	28.713	29.0047	29.0529	28.9861	29.2054	0.00170108	0.00668539	0.344302	EIF3L	B0QY89;Q9Y262;B0QY90
23.2857	24.1497	23.6342	23.4964	24.6773	24.613	24.665	24.6393	0.00157378	0.00668966	1.00713	DDX20	Q9UHI6
22.9231	22.3451	22.0727	22.3853	23.7219	23.3766	23.4589	23.3922	0.00164864	0.00670423	1.05584	ADAR	H0YCK3
29.4689	29.4335	28.5549	28.8914	27.488	26.3239	26.7859	25.5278	0.00155442	0.00670893	-2.55579	HLA-DQA1	Q5Y7D2;P01909
25.2496	25.4605	25.5677	25.5745	26.0341	25.9107	25.9931	26.275	0.00163641	0.00672316	0.590169	RAD21	O60216
19.5383	20.8396	20.5471	20.9815	22.0674	22.3118	22.5645	22.6184	0.00154617	0.00672832	1.91392	SLFN13;SLFN11	Q68D06;Q7Z7L1
29.2755	29.3913	29.3268	29.2795	29.8503	29.5215	29.777	29.7941	0.00173305	0.00674095	0.417466	GARS	P41250
30.6124	30.4922	30.701	30.4024	28.297	29.4272	29.2712	29.3297	0.00163627	0.00674221	-1.47075	RPL7	P18124;A8MUD9
30.7391	30.5874	30.6552	30.6058	30.8763	30.8133	30.8512	30.8276	0.00177684	0.0067438	0.195227	LAP3	P28838
22.7778	22.5682	22.6342	22.6545	23.5157	23.587	23.0446	23.6468	0.00154134	0.00674783	0.789858	KIAA1143	Q96AT1
28.9768	28.4796	28.7863	29.0938	28.0913	28.092	28.0285	28.1844	0.00177522	0.00676243	-0.735075	CAPG	P40121;E7ENU9;B8ZZL6
24.7225	24.3522	24.3779	24.6183	25.514	25.6121	25.2317	25.0776	0.00154072	0.00676744	0.841082	MYEF2	A0A087WUT0;A0A0A0MQW0;A0A0A0MR39;Q9P2K5;A0A0C4DGV1;H0YN19
26.5099	26.3041	26.3573	26.558	26.7761	26.8736	26.914	27.0972	0.0017589	0.00678116	0.482897	WDR18	U3KQC1;A0A0A0MQU0;Q9BV38;K7EIR0
29.6522	29.0641	29.527	29.366	27.8233	28.657	28.3545	28.1162	0.00175335	0.0068	-1.16457	RPL17;RPL17-C18orf32	A0A087WXM6;J3QQT2;J3KRX5;A0A0A6YYL6;P18621;J3QLC8;J3KRB3;A0A087WWH0;J3QS96;A0A0A0MRF8;A0A087WY81
25.084	24.942	25.0132	24.8937	25.2818	25.2592	25.4521	25.5001	0.00179195	0.00686813	0.390046	RRP1	P56182
31.7751	31.7785	31.6792	31.5089	32.0138	32.0376	32.0494	32.1671	0.00180943	0.00699178	0.381526	HNRNPU	Q00839;A0A1X7SBS1;A0A1W2PPS1;A0A1W2PP35;Q5RI18;A0A1W2PPL4;A0A1W2PPH7;A0A1W2PQL0;A0A1W2PP34;A0A1W2PQ74;A0A1W2PRZ7;A0A1W2PQD4
25.9396	26.147	26.1775	26.1418	26.4224	26.7334	26.494	26.6068	0.00181498	0.00719126	0.46265	CECR5	Q9BXW7
25.1342	25.1161	25.4142	25.143	24.8599	24.6452	24.5226	24.6937	0.00194462	0.00726486	-0.521551	FTSJ3	Q8IY81
26.1062	26.7382	26.3997	26.6475	27.2098	27.2951	27.3313	27.6477	0.00191121	0.00728455	0.898102	IQGAP2	Q13576;F5H7S7;E7EWC2;D6R939
22.0175	22.1808	21.5032	21.9427	20.6498	21.0461	20.2119	20.016	0.00190682	0.00730435	-1.43007	TMEM256	K7ENI6;K7ERE1;Q8N2U0
31.1455	31.2729	31.177	31.2124	31.4836	31.5218	31.4315	31.6928	0.00190044	0.00732425	0.33048	XRCC6	P12956;B1AHC9
22.4131	22.748	22.383	22.1672	23.1873	23.3928	23.1925	23.7864	0.00200548	0.00733867	0.961927	ZC3H11A	O75152;E9PBY7;E9PQ61
25.4742	24.8839	24.8711	25.5057	26.2032	25.9927	26.1657	26.3242	0.00200356	0.00735829	0.987718	DDX60	Q8IY21
28.6905	28.5372	28.7745	28.7027	29.0665	29.0345	28.9194	29.17	0.00206743	0.00737173	0.371396	AARS	P49588
27.5157	27.4295	27.594	27.6344	27.8602	27.9999	27.897	28.1796	0.00200183	0.00737802	0.440755	SMC3	Q9UQE7
26.9527	27.1297	26.7106	26.9315	26.4915	26.5078	26.4569	26.3565	0.00206367	0.00739108	-0.477958	TIGAR	Q9NQ88
27.2936	27.6676	27.5124	27.7446	28.1936	28.1277	28.0314	28.0702	0.0019753	0.00739785	0.551178	PITRM1	Q5JRX3;A0A0A0MRX9
31.9931	32.5768	32.539	32.3088	31.4683	31.6702	31.5557	31.7145	0.00206274	0.00741053	-0.752205	HSPA5	P11021
32.822	32.9721	32.9435	32.7786	33.2943	33.1354	33.1766	33.3553	0.00196358	0.00741779	0.361388	HSPD1	P10809
26.1328	26.0829	26.5023	26.8066	25.2376	25.3283	25.2176	25.6643	0.00217473	0.00743003	-1.0192	RPS10	P46783
27.4365	28.1816	28.072	27.7891	28.8864	28.6149	28.7849	28.9173	0.00205952	0.00743008	0.931071	ISG20	Q96AZ6;H0YMM4
27.0187	27.2658	27.2473	27.2238	26.8877	26.7587	26.8833	26.8774	0.00208266	0.0074375	-0.337098	AGK	Q53H12;E9PC15;A0A0G2JLG5;E9PG39
27.4831	27.3501	27.4534	27.272	27.7195	27.6457	27.6581	27.8194	0.00216868	0.00744898	0.321034	TRIM25	Q14258
30.0441	29.4025	29.7583	29.6699	27.4609	28.8262	28.1209	28.0651	0.00205639	0.00744974	-1.60043	RPS6	P62753;A2A3R5
23.071	22.3951	21.5366	22.6071	24.3092	23.9627	23.9753	24.3102	0.00207582	0.00745692	1.73692	PIK3R6	Q5UE93;A0A087X1F3
28.6524	28.5467	28.4615	28.6152	28.1574	28.2892	28.3599	28.1949	0.00216627	0.00746803	-0.318577	ACTN1	P12814;H9KV75
26.1216	26.2979	25.9851	26.3755	26.6982	26.9957	27.1126	27.3629	0.00205167	0.0074695	0.847312	NFYC	Q5T6K7;E9PI99;Q5T6K5;Q13952;A0A0A0MT00;E9PJA8;E9PQR2
28.9141	28.7382	28.7056	28.6755	28.4339	28.4466	28.3316	28.1938	0.00215428	0.00748718	-0.406875	GNAI2	P04899
31.1269	31.3883	31.3746	31.0532	30.7464	30.6147	30.6953	30.8466	0.00204131	0.00748936	-0.510015	PPIB	P23284
23.6996	24.0008	23.8094	23.9314	24.281	24.9034	24.8847	24.6472	0.0021499	0.00750643	0.818759	KIAA1429	Q69YN4;H0YBN5
23.6531	23.4347	23.5946	23.4354	23.9092	23.9504	24.2409	24.2683	0.00214364	0.00752577	0.562763	DNAJC19	Q96DA6;F2Z3A7
21.0628	21.5708	21.2774	21.7017	22.3713	22.0773	22.4312	22.1653	0.00211136	0.00754522	0.858101	TMC8	Q8IU68
27.0942	26.7892	26.8589	27.0353	27.4794	27.3831	27.3167	27.626	0.00211054	0.00756477	0.506946	CARS	B4DKY1
28.5316	28.2915	28.211	28.4261	28.7323	28.7888	28.6892	28.7602	0.00224005	0.00756675	0.377622	TRA2B	P62995;H7BXF3
24.9757	25.3148	25.2034	24.8472	26.0213	25.6768	25.6525	25.7904	0.00208545	0.00758442	0.69996	CPSF2	Q9P2I0
31.8803	31.3097	31.398	31.5861	30.3691	30.6539	30.6639	30.9511	0.00222046	0.00758586	-0.884014	LMNA	P02545
29.1401	28.7742	29.0759	29.0892	29.6679	29.567	29.4579	29.425	0.0021993	0.00760506	0.509613	SRSF1	J3KTL2;Q07955;J3KSR8
28.9839	29.3014	29.149	29.0229	28.3784	28.5817	28.6247	28.7412	0.00218989	0.00762437	-0.532791	RPL31	P62899;C9JU56;B7Z4E3;B7Z4C8;B8ZZK4;H7C2W9
28.3256	28.5242	28.5743	28.1688	27.5198	27.7388	27.8337	27.92	0.00227292	0.00805025	-0.645116	FAU	E9PR30;P62861
25.3979	24.8333	24.734	24.9686	25.7542	25.6783	26.0363	26.1056	0.00230486	0.0083609	0.910149	CRYL1	Q9Y2S2
24.702	24.746	25.0515	25.3869	26.0591	25.8073	25.7884	26.3268	0.00234972	0.00839604	1.02381	IFIT5	Q13325
27.5007	27.3354	27.3727	27.3557	27.6963	27.7902	27.9347	28.108	0.00233165	0.00841687	0.491199	DDX46	A0A0C4DG89;Q7L014;D6RJA6
24.3408	24.5124	24.6923	24.6886	25.1833	24.9733	25.0647	24.9779	0.00232604	0.00843781	0.491248	IWS1	Q96ST2;A0A1B0GW95
25.3957	24.9664	24.9608	25.241	25.657	25.7237	25.6569	25.7372	0.00231416	0.00845885	0.552743	SBDS	A0A087X020;Q9Y3A5
27.848	27.5453	27.598	27.6178	28.3712	28.0096	28.2837	28.1001	0.00231131	0.00848	0.538853	SSBP1	A0A0G2JLD8;E7EUY5;Q04837;C9K0U8
24.1155	23.9781	23.8078	23.9743	24.7066	25.5062	24.8257	25.5884	0.00237173	0.00851232	1.1878	ZC3HAV1L	Q96H79
26.4731	26.2422	26.3675	26.4189	26.7519	26.8703	27.1811	27.2177	0.00236656	0.00853333	0.629832	MRE11A	F8W7U8;P49959
25.8181	25.143	25.2216	25.3096	24.4693	24.6025	24.4275	24.0124	0.0024199	0.00860784	-0.995138	AMPD3	Q01432;E9PKC5
22.0703	22.5722	22.0508	22.0461	23.42	22.7457	23.2049	23.2753	0.00241446	0.00862899	0.976585	PASK	Q96RG2
28.8286	28.888	28.9228	28.922	29.3122	29.1578	29.2418	29.5398	0.00250828	0.00874576	0.422566	IDH3A	P50213;H0YL72;H0YMU3
26.1712	26.4659	26.4068	25.9719	26.8446	26.7561	26.9317	27.0132	0.00243757	0.00876284	0.632467	GNL3	Q9BVP2
25.4665	25.8417	25.513	25.395	26.2109	26.035	26.0247	26.2695	0.00250488	0.00876699	0.580988	DSTN	P60981;F6RFD5
27.7518	28.2644	28.2497	28.1403	26.9707	27.1513	27.3953	27.5039	0.00248449	0.00878832	-0.846225	NCKAP1L	P55160;F8W050
30.4286	30.0346	30.2663	30.1694	28.3026	29.3585	29.2315	29.0134	0.00246187	0.00880976	-1.24822	RPS8	P62241;Q5JR95
28.6803	28.7265	28.8278	28.6644	28.2704	28.4816	28.4917	28.3127	0.00259202	0.00889209	-0.335639	BZW1	Q7L1Q6;C9IZ80
23.4325	24.018	23.7448	23.7028	24.639	24.8521	24.2923	24.4669	0.00258115	0.00891346	0.838063	EXOSC2	Q13868;A3KFL2;A3KFL1;A3KFL5
22.1685	22.2034	22.7351	22.9591	23.4664	23.5752	23.4717	23.4798	0.00256117	0.00893494	0.981761	OARD1	C9JNE2;Q9Y530;C9JXC3;C9J5P1
25.7409	25.2345	25.0567	25.1534	26.0471	26.2763	26.0703	26.0205	0.00260372	0.0089378	0.807159	ADD3	Q9UEY8
28.1836	28.4853	28.3524	28.3361	28.8104	28.6432	28.6373	28.7548	0.00255345	0.00895652	0.372097	LARS	Q9P2J5
27.2127	27.4034	27.1163	26.9966	26.5687	26.4928	26.5594	26.8394	0.00264481	0.008974	-0.567181	SH3BGRL	O75368
26.5882	26.9993	26.9752	26.6811	25.4825	25.9907	25.7824	26.2358	0.00264024	0.00899526	-0.938061	BLVRB	P30043;M0R192
27.5705	27.4901	27.3033	27.4385	26.9855	27.1212	27.1864	27.1444	0.00297442	0.00900222	-0.341197	LNPEP	Q9UIQ6
29.9802	30.1251	30.0081	30.0496	29.552	29.6961	29.7154	29.8493	0.00263835	0.00901663	-0.337564	DYNC1H1	Q14204
25.9587	26.3651	26.1539	26.309	25.6431	25.6988	25.1959	25.4463	0.00297402	0.00902222	-0.700623	THEMIS2	Q5TEJ8;H7C124
28.6092	28.6467	28.6817	28.5979	28.2065	28.165	28.1406	28.4715	0.00263827	0.0090381	-0.38801	UGGT1	Q9NYU2
27.8849	28.1588	28.0233	28.0658	28.5074	28.2886	28.414	28.5953	0.00297235	0.00904232	0.418118	ACADVL	P49748
26.0114	20.9148	19.8688	20.7101	28.6415	28.8156	28.9551	28.6824	0.00262604	0.00905967	6.89736	HLA-DRB1	Q9TQE0;P13761;A0A140T958
30.2913	30.2718	30.1005	30.1392	30.4994	30.47	30.4331	30.4024	0.00295044	0.00906067	0.250541	SFPQ	P23246
28.4237	28.3272	28.4604	28.5158	27.9336	28.2162	28.1041	27.9313	0.00296454	0.0090625	-0.38549	RFTN1	Q14699;G3XAJ6;C9JHG2
26.138	26.1565	26.3425	26.3124	26.676	26.8755	26.8554	27.3113	0.00306048	0.00906374	0.692163	SRSF10;FUSIP1	Q5JRI1;O75494;Q6IQ42
24.1581	24.7384	24.2591	24.0243	25.1439	25.1809	25.0113	24.983	0.00294455	0.00908108	0.784809	TANK	Q92844;E7EQA9;H7C3L4
29.0948	29.5894	29.6111	29.3314	30.3565	29.8702	30.2929	30.29	0.00296184	0.00908277	0.795709	ISG15	P05161;A0A096LPJ4;A0A096LNZ9
26.1641	26.6796	26.6613	26.7035	27.2533	27.1963	27.1494	27.1387	0.00305861	0.0090837	0.632319	DTYMK	P23919;H7C312
29.8803	30.3441	30.151	30.0333	30.6522	30.5695	30.5991	30.5579	0.00265491	0.00909434	0.492503	DDX17	A0A1X7SBZ2;Q92841
28.2745	28.6079	28.3407	28.436	28.8681	28.7516	28.7878	28.9968	0.00294396	0.00910158	0.436284	LONP1	K7EKE6;P36776;K7EJE8
27.438	27.4042	27.238	27.1919	28.2658	28.3006	28.0868	27.6644	0.00295687	0.00910314	0.761366	U2AF1	P0DN76;Q01081
28.1276	27.7394	27.7648	27.7231	27.1471	27.2957	27.1977	27.4552	0.0030543	0.00910375	-0.56481	SQRDL	Q9Y6N5;H3BNX3
26.1982	25.3722	25.4541	25.5239	24.6687	24.7845	24.345	24.1652	0.00291794	0.00912217	-1.14623	GTPBP4	Q9BZE4
26.1988	26.2998	26.3107	26.2271	25.9622	25.3758	25.6641	25.6813	0.00303315	0.00912389	-0.588273	MALT1	Q9UDY8
26.4777	26.6312	26.5916	26.4916	27.0678	26.7442	26.9855	27.0692	0.00270608	0.00914019	0.418669	SMC4	E9PD53;Q9NTJ3
30.7785	30.4288	30.6718	30.538	30.2446	30.1871	30.2495	30.0945	0.00283327	0.00914023	-0.410348	RPL11	P62913;Q5VVC8;Q5VVC9
22.8227	22.4055	22.4708	22.3778	23.1398	23.8881	23.3369	23.3785	0.00291733	0.00914286	0.916612	CLIP1	P30622;J3KP58;F5H0N7
22.4528	22.9612	22.7198	22.3418	24.2307	23.5316	23.3901	23.9818	0.00282405	0.00916129	1.16464	BCL7A;BCL7B	Q4VC05;F8WE18;F8WDZ4;F2Z3H6;Q9BQE9
29.9181	30.3632	30.2753	30.263	30.7161	30.7031	30.6353	30.7388	0.00270552	0.00916159	0.493419	IDH2	P48735;H0YL11
26.4363	26.9707	27.0385	26.8601	25.7443	25.9271	25.7586	26.2907	0.00290923	0.00916364	-0.89621	APOL2	J3KQL8;Q9BQE5;E9PM95
29.2328	29.0684	29.1335	28.9179	28.0437	28.6836	28.461	28.2402	0.00308772	0.00916667	-0.731032	RPL36	Q9Y3U8;J3QSB5
28.1145	27.6004	27.8104	27.9106	28.4593	28.2851	28.4859	28.4912	0.0028231	0.00918245	0.571432	SSB	P05455;E7ERC4
21.3973	21.7027	21.6705	21.4842	22.4277	21.9169	22.2273	22.4	0.00269671	0.0091831	0.679234	HPS6	Q86YV9
28.6644	28.0169	28.5268	28.4374	27.0096	27.6254	27.586	26.9144	0.00290299	0.00918451	-1.12754	RPL36AL	Q969Q0
25.7099	26.1968	26.0366	26.2562	26.6253	26.6249	26.6577	26.7857	0.00281939	0.0092037	0.623539	SMARCD2	J3KMX2;B9EGA3;Q92925;J3QWB6
26.2905	26.0983	25.8993	25.9283	25.659	25.558	25.591	25.5867	0.00267565	0.00920471	-0.455433	AP2M1	A0A087WY71;Q96CW1;E9PFW3;C9JJ47;C9JGT8
26.2509	26.5757	26.5859	26.5525	26.8987	26.8702	26.8903	27.0453	0.00288853	0.00920548	0.434878	STAG2	Q8N3U4
21.9919	22.156	22.2552	22.4221	22.9443	23.1796	23.7903	23.97	0.00280602	0.00922506	1.26473	TMOD2	Q9NZR1;G5EA42
24.8943	25.0861	24.5012	25.2079	25.6269	25.639	25.7451	25.8804	0.00287718	0.00922654	0.800447	PDK1	Q15118
28.3389	28.3887	28.2337	28.2871	27.9636	27.936	28.1409	28.0722	0.00277666	0.00924651	-0.283927	CPOX	P36551
28.9785	28.9089	29.0634	29.0796	29.1731	29.2664	29.3463	29.2788	0.00285703	0.00924771	0.25853	EIF3C;EIF3CL	Q99613;B5ME19
24.5459	24.9365	24.744	25.089	25.5867	25.3388	25.409	25.548	0.00275372	0.00926807	0.641767	NUB1	H3BM14;H3BM74;Q9Y5A7;C9JRT6;F8WDB6
25.3549	26.0911	25.5825	25.5311	26.3966	26.3146	26.4517	26.5103	0.00312216	0.00951965	0.7784	FAF1	Q9UNN5;B1ANM7;B3KT28
24.5687	24.4168	24.8205	24.6215	23.9179	23.9281	23.473	23.1372	0.00312132	0.00954048	-0.992852	TM9SF2	Q99805
22.2374	21.5678	22.127	21.7408	20.989	20.8527	21.2955	20.7147	0.00314984	0.00963478	-0.955295	SEMA4D	E9PFD9;Q92854
20.8411	21.3611	20.6197	20.8928	21.61	22.2326	22.0015	21.7877	0.0031399	0.00965577	0.979299	HLA-B	Q29718
29.6899	29.3471	29.3707	29.1688	28.4209	28.8611	28.8375	28.5597	0.00317931	0.00978742	-0.724354	RPL32	D3YTB1;F8W727;P62910
24.5537	24.1491	24.0188	24.1455	24.7807	24.9424	24.7506	25.1218	0.00323698	0.0100259	0.682109	ASH2L	F5H8F7;Q9UBL3
25.5525	25.1669	25.5051	24.9094	23.9997	24.5691	24.3331	24.4955	0.00320919	0.0100475	-0.934098	RSU1	Q15404
29.7164	29.8793	29.8338	29.7209	30.0116	30.2547	30.1111	30.0486	0.00320727	0.0100693	0.318904	PCBP1	Q15365
25.7399	26.308	25.9398	26.2632	26.8598	26.6258	26.8044	26.7004	0.00325519	0.0100985	0.684887	POLR2B	A0A1W2PPT5;C9J2Y9;P30876;C9J4M6
28.494	28.1822	28.3908	28.3905	27.9498	28.0545	27.9255	27.721	0.00325108	0.0101202	-0.451628	RHOG	P84095
22.8424	23.1614	23.3083	22.6536	22.3778	21.4933	21.479	21.7632	0.00329277	0.0101271	-1.21311	TRIAP1	O43715
27.8232	27.5663	28.1237	27.7505	27.25	26.9356	26.8164	27.2436	0.00324051	0.0101419	-0.754508	MANF	A8K878;P55145
22.0931	22.7965	22.4326	22.8785	23.9037	23.4207	23.5221	24.2294	0.00329212	0.0101486	1.21879	CASP6	P55212;D6RHU3;D6RBM3
27.2163	27.5148	27.3551	27.311	27.8162	27.6138	27.6621	27.7601	0.0033272	0.0101551	0.363719	CMTR1	Q8N1G2
25.7314	26.0149	26.2486	26.2531	26.6913	26.6638	26.8461	27.1329	0.00328358	0.0101702	0.771539	ATXN2L	Q8WWM7;H3BUF6;H3BSK9
24.8536	24.8343	24.7949	24.9087	25.2312	25.3756	25.0133	25.2749	0.00332471	0.0101765	0.375876	TEX10	Q9NXF1
26.4246	26.1497	26.3002	26.4534	26.764	26.9099	27.0159	26.6472	0.00327706	0.0101919	0.502245	WAS	P42768
24.324	24.1708	24.3857	24.2618	23.9375	23.4554	23.3643	23.7506	0.00331795	0.0101979	-0.658645	SAMD9L	Q8IVG5
26.9234	26.9122	26.7688	26.5562	26.2916	26.2927	26.273	26.4695	0.00327266	0.0102137	-0.458448	EIF2A	Q9BY44;F8WAE5;C9IZE1
26.3141	26.3031	26.1191	26.0882	26.4486	26.6062	26.7547	26.6939	0.00331608	0.0102194	0.419739	CHERP	J3QK89;Q8IWX8
26.2359	25.9368	25.4849	25.8114	25.1446	25.003	24.5062	24.4676	0.00337101	0.0102296	-1.08692	MLEC	F5H1S8;Q14165;H0YG07
22.8677	23.5297	23.2593	23.2395	25.214	25.1439	23.9554	25.5779	0.00357144	0.0102351	1.74876	KIF2C	Q99661
22.545	23.7039	23.1143	22.9849	24.4069	24.075	24.2081	24.4198	0.00331033	0.010241	1.19042	ATAD2	Q6PL18;A0A0B4J211
25.0115	24.295	24.3601	24.7686	25.7559	25.5356	25.6602	25.2604	0.00336519	0.010251	0.944206	DCTD	P32321;D6RBJ9
27.1523	27.1756	27.1691	27.2331	26.9303	26.7356	27.0234	26.8793	0.00355211	0.0102562	-0.290359	TWF2	Q6IBS0;D6RG15
26.7433	27.2889	27.178	27.1792	27.6504	27.6619	27.6294	27.7131	0.00355112	0.0102774	0.566393	SNRPA1	P09661;H0YKK0;H0YMA0
28.1012	28.3371	28.1136	28.3256	28.798	28.6396	28.4757	28.7137	0.00353692	0.0102988	0.437377	SMARCA5	O60264
22.1571	22.9171	22.3492	22.3216	23.1149	23.2815	23.2618	23.4939	0.00351013	0.0103202	0.851764	AP1S2	H7BZG6;H0Y673;F6SFB5;A6NH01;P56377
21.8864	21.6841	21.725	21.8139	22.7475	22.7123	22.2543	22.2087	0.00350979	0.0103417	0.70335	PPFIBP2	Q8ND30;E9PP16
30.0464	29.3771	30.0746	30.1121	28.978	29.1877	29.0957	28.9432	0.00362247	0.0105216	-0.851403	LSP1	P33241;E7EMG9;E9PBD8
29.0953	29.123	29.2207	29.2774	29.4166	29.3377	29.4798	29.4654	0.00360196	0.0105432	0.245766	AK2	F8W1A4;P54819;F8VY04;F8VZG5
24.9353	25.218	24.5819	24.9238	24.0469	24.1697	23.9223	23.3217	0.00373403	0.0105484	-1.04959	PPIL3	H7BZ14;Q9H2H8;B8ZZ77;C9K058
20.2055	21.126	19.3184	19.5341	22.4701	27.0323	27.2178	28.2358	0.00369709	0.0105558	6.19301	HLA-B	P03989
26.3351	26.2839	26.541	26.3497	25.7294	26.1314	25.682	25.8471	0.00373315	0.0105697	-0.529953	CCDC124	Q96CT7
21.4382	19.7296	20.8542	20.5361	22.3984	23.1654	22.2012	22.4239	0.00368323	0.0105772	1.90767	MTA3	E9PCS8;E7EQY4;E7EV10;Q9BTC8;D6W5A2
26.4283	26.6053	26.4999	26.4977	26.8333	26.7847	26.9573	27.1695	0.00371993	0.0105911	0.428389	PPIH	C9JQD4;O43447;H0YEL5
28.9905	29.2511	29.2931	29.2757	29.6085	29.5936	29.4685	29.5755	0.00368098	0.0105988	0.358897	SEPT2	Q15019;B5MCX3;C9J2Q4;H7C2Y0;C9JB25
22.8131	22.2108	21.6592	22.2487	23.7367	23.107	23.6995	23.4609	0.00375474	0.0106104	1.26806	RIT1	Q92963;V9GY29;V9GYC3
28.4293	28.9712	28.968	28.6913	28.1931	28.1571	28.165	28.1496	0.00367705	0.0106204	-0.598723	PRMT1	E9PKG1;H7C2I1;Q99873;E9PIX6;E9PQ98;H0YDE4;E9PNR9;A0A087X1W2
28.6778	28.9608	28.8444	28.8278	28.5446	28.5873	28.398	28.4678	0.00374742	0.0106318	-0.328296	HSPA1B;HSPA1A	A0A0G2JIW1;P0DMV9;P0DMV8;V9GZ37
29.2068	29.5144	29.606	29.3662	28.8269	29.038	28.9394	29.0328	0.00363422	0.0106421	-0.464071	PDLIM1	O00151
25.7028	24.2375	25.0092	25.0711	26.4386	26.5075	26.2661	26.9313	0.00363191	0.0106639	1.53075	IFIT2	A0A087X279;P09913
23.2095	23.3753	22.7244	22.9733	24.0523	23.5627	24.0858	24.1194	0.00380102	0.0107735	0.884398	RBBP5	Q15291
28.8688	28.8616	28.9597	28.8301	28.7294	28.5372	28.4067	28.5319	0.00386946	0.0111633	-0.328758	DLD	P09622;E9PEX6
27.8415	27.5415	27.7752	27.7861	27.9768	28.1073	28.1973	28.201	0.00394907	0.0111716	0.384504	ADH5	P11766
26.2534	26.6967	26.5163	26.4657	27.0029	26.8585	26.9112	27.1167	0.00385676	0.0111856	0.489363	LRRC40	Q9H9A6
26.3714	26.7036	26.4608	26.3865	26.9256	27.0223	26.7498	27.0238	0.00416921	0.011186	0.4498	SMC2	O95347
23.6592	23.6458	23.8056	23.8822	24.3715	24.3817	24.1493	24.8116	0.00394408	0.0111937	0.680329	MRPL41	Q8IXM3
29.0692	28.9695	29.1174	29.1258	28.8223	28.8976	28.8195	28.9274	0.00397946	0.0112047	-0.203803	FDPS	P14324;A0A087WVN4;A0A087X090
25.2045	24.054	24.5605	23.6721	25.8283	26.1511	25.6916	26.0742	0.00415668	0.0112078	1.56352	SEPT8	A0A087X142;A6NMH6;A6NFQ9;F8W8I8;Q92599
29.2221	29.3855	29.1927	29.0154	29.7162	29.5008	29.6055	29.5931	0.00385285	0.011208	0.399976	DDX3X	A0A0D9SFB3;A0A0D9SG12;A0A0D9SF53;O00571
27.5319	27.105	26.9191	27.1058	26.4496	26.1679	26.5674	26.5649	0.00392181	0.0112158	-0.727989	ICAM1	P05362;K7EKL8
24.9997	25.4239	25.2105	25.1877	25.9281	25.519	25.8891	25.7642	0.00411616	0.0112296	0.569643	HIBADH	P31937
24.7333	23.7083	23.7544	23.9771	22.916	21.821	22.7785	21.9081	0.00391895	0.0112381	-1.68737	SNX29	Q8TEQ0
31.37	30.9058	31.0389	30.9626	29.7452	30.1241	30.3437	30.5209	0.00409566	0.0112515	-0.885821	RPS18	P62269
25.5052	25.4621	25.6193	25.3578	26.0048	26.1621	26.8373	26.3714	0.00391026	0.0112604	0.857783	BLNK;BASH	Q8WV28;Q2MD59
26.4569	26.6769	26.482	26.4692	26.2742	26.1227	26.2804	26.2534	0.00406292	0.0112734	-0.288591	AP3D1	O14617
25.5431	24.321	24.2732	24.2924	23.3416	22.8092	22.9266	23.261	0.00404843	0.0112955	-1.52283	WDFY1	Q8IWB7;C9JJ54
28.689	28.5823	28.5093	28.541	28.9712	28.7831	28.8518	29.0726	0.00402765	0.0113176	0.339312	RUVBL2	Q9Y230;M0R0Y3
24.8002	24.8695	24.7907	24.9048	24.5226	24.3447	24.3762	23.981	0.00400539	0.0113399	-0.535179	NDUFB1	O75438
21.9383	21.7442	21.4986	21.5308	22.9805	22.1593	22.7635	23.1865	0.00420046	0.0114363	1.09443	C4orf27	Q9NWY4
29.7302	28.4986	28.9635	28.5166	27.3545	27.7125	27.7096	27.5438	0.0041921	0.0114584	-1.34713	RPS23	P62266;D6RD47
26.6269	27.1874	26.8647	26.9721	27.5721	27.4045	27.4509	27.7717	0.00423621	0.0116538	0.637014	CTNNBL1	A0A087WUB9;Q8WYA6
24.5704	25.4122	25.1635	25.1318	26.0225	25.8011	25.8648	26.2615	0.00422299	0.0116763	0.918008	PARP14	Q460N5;H7C5R8
24.5147	24.5795	24.5029	24.3942	24.1511	23.4563	23.7302	23.9333	0.00433566	0.011687	-0.680127	RAB18	Q9NP72;A0A087X163
26.5925	26.531	26.1014	26.5753	25.3392	26.0064	25.3718	25.1388	0.00431255	0.0117094	-0.985975	BCAP31	P51572
25.7421	25.6007	25.3971	25.2964	26.1441	25.8609	26.0332	26.1182	0.00428708	0.0117318	0.530046	RFC4	P35249;C9JZI1;C9J8M3
28.5692	28.4486	28.3572	28.6534	28.8148	28.8416	29.0795	29.1177	0.0042659	0.0117543	0.456291	DLST	P36957;Q86SW4
28.7409	29.1158	29.0469	28.9386	29.4338	29.521	29.3668	29.2641	0.00436728	0.0117643	0.435911	HNRNPUL2;HNRNPUL2-BSCL2	Q1KMD3;H3BQZ7
26.9082	27.6864	27.3908	27.2778	28.043	27.9323	28.1253	28.1906	0.00434639	0.0117867	0.756991	UBA2	Q9UBT2;K7EPL2
21.7832	22.3519	22.1323	22.4014	21.4431	21.3456	21.5903	21.5906	0.00451307	0.0118652	-0.674791	BCAR1	P56945
27.5476	27.6707	27.7076	27.6257	27.8844	27.8454	27.878	28.0848	0.00446509	0.0118874	0.285231	EIF4G2	D3DQV9;P78344;H0Y3P2;H0YCH5
29.3741	27.845	28.6501	28.5513	25.9955	27.1833	26.8416	27.074	0.00437657	0.0118939	-1.83155	HIST1H1B	P16401
23.905	24.1283	24.088	24.4619	25.4734	24.9721	25.1976	24.6491	0.00445295	0.0119098	0.927287	NUP85	J3KT10;Q9BW27;J3QL54;J3QLH0;F5H0W7
28.3806	28.5583	28.5247	28.4338	28.3186	28.0918	28.1694	28.0575	0.00437535	0.0119165	-0.315033	PSMB1	P20618
25.3153	25.9877	25.92	25.8167	25.0962	25.1345	25.0711	24.9565	0.00443672	0.0119322	-0.69541	ACAA1	C9JDE9;P09110;H7C131;H0Y4D4
27.6266	27.4594	27.5149	27.7281	27.268	27.2061	27.3757	27.2234	0.0044296	0.0119547	-0.313927	LASP1	C9J9W2;Q14847
22.6804	23.1905	22.4778	22.2559	23.682	23.4344	23.7902	24.1819	0.00442413	0.0119773	1.12095	ATG4B	C9JIK8;C9JQ72;Q9Y4P1;H0Y2Y0;F2Z2K8
21.6345	21.9501	22.119	19.8778	24.1514	23.6775	23.7174	23.4697	0.00453416	0.0120972	2.35864	ISYNA1	Q9NPH2
22.756	22.7886	22.1665	22.1333	23.679	23.1215	23.3301	23.6151	0.00456895	0.0123134	0.975317	C16orf62	F5H7K1;E7EWW0;Q7Z3J2;H3BVG8;H3BV68;C9J7I2
25.8239	25.9211	25.6067	25.6792	25.4613	25.1053	25.2924	25.3596	0.0045914	0.0123717	-0.453089	ACADS	P16219;E9PE82
29.0805	29.1303	29.2401	28.9151	28.7989	28.696	28.7925	28.5754	0.004588	0.0123948	-0.375819	CD48	A0A087X1S7;P09326
28.5305	28.6145	28.443	28.1316	29.0366	28.8799	28.8953	29.2194	0.00461739	0.0125704	0.57791	NASP	P49321;Q5T624
23.1072	23.823	23.3628	23.8895	24.7716	24.5754	24.2631	24.3934	0.00460935	0.0125937	0.955233	LIG3	P49916
24.7562	25.2192	25.3678	25.1623	24.5631	24.4596	24.6085	24.5114	0.00463731	0.0126188	-0.590725	MT-ATP6	P00846
22.5894	22.4571	22.2797	22.5118	21.8062	22.1625	21.8398	22.0887	0.00463089	0.0126421	-0.485228	ABCC4	O15439
24.2058	25.1034	24.2647	24.3334	26.1265	25.3747	25.4829	25.63	0.00462421	0.0126654	1.1767	PIR	O00625
23.2967	23.6949	23.7731	23.2236	21.4089	22.6963	22.3908	22.1034	0.00469537	0.0126861	-1.3472	PPAN-P2RY11;PPAN	A0A0A6YYI3;A0A0B4J1V8;Q9NQ55;C9J3W3;A8MV53
21.6394	20.9518	21.9635	21.2777	22.7784	22.3717	22.3368	22.5838	0.00468799	0.0127093	1.05961	CKS1B	Q9BZU3;Q5T179;P61024
21.329	20.9928	20.9572	21.3208	21.4996	22.1447	21.9949	21.9682	0.00477108	0.0127187	0.751879	HPS5	Q9UPZ3;G3V159
24.3934	24.9551	24.6353	24.6088	25.2095	25.1721	25.0836	25.2959	0.00468204	0.0127326	0.542126	NIF3L1	Q9GZT8;E7EXA3;Q6X734
22.4237	24.0855	23.9642	23.6744	21.522	22.0173	21.8742	21.8383	0.00474752	0.0127418	-1.72404	CD226	Q15762;J3QR77;J3QQW1
25.8489	26.4526	26.2224	26.3872	27.0033	26.8099	26.978	27.4285	0.00466121	0.012756	0.827139	HCFC1	A6NEM2;P51610
25.4173	24.6279	24.6025	24.773	23.3822	23.2607	24.0131	23.9772	0.00471879	0.012765	-1.19687	FUCA1	P04066
26.8548	26.8407	26.3801	26.8403	27.2232	27.2271	27.2279	27.3581	0.00465425	0.0127794	0.530096	RALA	P11233;H7C3P7
23.9285	24.1053	23.3461	23.9541	25.3315	24.4835	24.8885	24.8254	0.00484895	0.0128406	1.04871	ZC3H12D	A2A288
29.7636	29.8726	29.6483	29.7123	30.0762	29.9747	29.9629	30.1776	0.00494467	0.0128489	0.298663	IQGAP1	P46940;A0A0J9YXZ5;H0YLE8
25.3439	25.1815	25.1798	24.9772	25.6316	25.4256	25.5504	25.6632	0.00497262	0.012853	0.39713	XPOT	O43592
30.9776	30.5255	30.7768	30.7335	30.1612	30.3696	30.3821	30.2616	0.00492987	0.0128721	-0.459739	CAP1	Q01518;Q5T0R1
28.535	28.2773	28.1867	28.3512	28.7243	28.8962	28.5996	28.83	0.00496857	0.0128761	0.424974	PSIP1	O75475
32.8276	32.538	32.5906	32.4875	32.0725	32.2388	32.2434	32.3128	0.00489655	0.0128953	-0.394092	PRDX1	Q06830;A0A0A0MSI0
23.7884	22.9205	23.074	22.9425	24.2798	24.3974	23.9485	24.8092	0.00488628	0.0129186	1.1774	PCIF1	Q9H4Z3
23.5988	24.3974	24.1016	24.2252	24.919	24.822	24.9101	24.7294	0.00504008	0.0129324	0.76434	PSMB6	P28072
28.2327	28.5032	28.3173	28.1616	28.636	28.6121	28.7216	28.8725	0.00502437	0.0129554	0.40683	PDCD6	O75340;A0A024QZ42
21.4543	21.1027	21.4094	21.0718	23.0948	22.4199	22.1286	21.9846	0.00502237	0.0129786	1.14739	FBXO6	Q9NRD1;J3KQ72
31.1623	30.6899	30.8817	30.6294	28.4795	29.874	29.6685	29.5639	0.00499926	0.0130018	-1.44435	RPL4	P36578;H3BM89
23.468	23.306	23.5173	23.5828	22.7124	22.6826	22.4635	23.1918	0.0051292	0.0130799	-0.705946	HEATR5B	Q9P2D3
22.9316	23.0126	23.2309	22.7051	23.7583	23.4237	23.6901	24.1323	0.00514878	0.0131277	0.781034	ACTR5	Q9H9F9
27.8862	27.887	27.8468	27.871	28.0502	28.0458	28.057	27.9208	0.00515251	0.0131681	0.145697	NARS	O43776
25.5709	22.94	24.6871	25.32	21.644	22.6956	21.2522	21.3992	0.0053347	0.013214	-2.88177	MAP2K3	P46734
25.1824	25.0936	24.9648	24.7488	25.6904	25.6266	25.3018	25.7976	0.00530806	0.0132373	0.606731	PANK4	A0A0G2JR38;E9PHT6;Q9NVE7;H0YA26
26.9321	27.1024	26.8856	26.8411	26.6039	26.0754	26.5095	26.3806	0.00529915	0.0132606	-0.547975	GFM1	Q96RP9;C9IZ01;F8WAU4
28.1555	28.2042	28.1915	28.1545	28.3314	28.5166	28.3013	28.4577	0.0052087	0.013284	0.225321	H2AFY	O75367;B4DJC3
29.3115	29.5364	29.4834	29.4833	29.1964	29.264	29.218	29.2542	0.0051838	0.0133074	-0.220513	PFKL	P17858
24.7458	24.6389	24.7663	25.0063	23.696	24.2723	22.9779	23.3824	0.00535872	0.0133077	-1.20711	NMRAL1	Q9HBL8;I3L1Y8;I3L3Z0
23.5237	23.1732	23.0466	23.1381	23.612	24.0298	24.0014	24.341	0.00535408	0.013331	0.775625	HELLS	A0A087WSW7;F6XU50;A0A0B4J1V9;Q9NRZ9
24.2911	24.6455	24.513	24.615	24.8359	24.9281	24.9148	24.8209	0.00545619	0.0135052	0.358774	MAPK14	B4E0K5;Q16539;E7EX54;B5TY33
25.0355	25.2465	24.91	25.0032	25.5081	25.2812	25.427	25.4255	0.0054496	0.0135288	0.361619	CXorf38	Q8TB03
31.2988	31.3013	31.2114	31.3256	31.4618	31.4629	31.5428	31.6971	0.00549721	0.0135694	0.256877	TKT	P29401;A0A0B4J1R6
23.6399	24.0222	23.4769	23.8601	23.0622	22.9996	23.0675	23.3784	0.00549376	0.013593	-0.622876	MPV17	B5MC53;B5MCF8;P39210;G5E9F5;E7EX18
22.6617	23.4556	22.9635	23.0676	23.6954	23.8927	23.6638	23.7878	0.00564173	0.0137015	0.722834	NFATC2IP	Q8NCF5;H3BSZ7
25.5968	25.2731	25.614	25.3204	24.9657	25.085	25.0365	24.7436	0.00562775	0.0137251	-0.493345	SPTLC1	O15269
22.8996	22.5596	22.4026	22.5996	22.1942	22.0524	22.1149	22.2269	0.00558483	0.0137487	-0.468245	GBP4	Q96PP9
25.5586	25.4665	25.3349	25.7023	25.0924	24.7482	25.1921	24.839	0.00558216	0.0137724	-0.547654	MMAB	Q96EY8;S4R3P5;F5H4Z7
25.9394	25.9821	25.9168	25.9515	26.2457	26.3955	26.2532	26.0632	0.00566388	0.0137877	0.291933	RAVER1	A0A087WZ13;E9PAU2;Q8IY67
21.5748	22.5868	22.1732	22.8424	23.4639	23.533	23.3411	23.8427	0.00557122	0.0137962	1.25088	ERCC2	A8MX75;P18074;K7EIT8;E7EVE9
24.415	24.4763	24.6375	24.9482	25.2163	25.0219	25.3361	25.1928	0.00557004	0.0138201	0.572511	ELP2	Q6IA86
26.4378	26.7231	26.6026	26.6046	26.7776	26.9967	27.0171	27.0974	0.00556501	0.013844	0.380182	XRN2	Q9H0D6
24.5314	25.5631	25.4398	24.9448	26.2547	26.2849	26.0424	26.0365	0.00570165	0.0139692	1.03482	HLA-G	Q8MH48;Q5RJ85;A0A0G2JPQ3;P17693
25.0433	25.5542	25.706	25.9658	24.6924	24.8976	24.5763	24.3879	0.00574511	0.014146	-0.928794	TM9SF3	Q9HD45;Q5TB53
27.71	27.9108	27.9558	27.9024	28.057	28.1223	28.143	28.2047	0.00571688	0.0141502	0.261956	SNRPF	P62306;A0A0B4J254;F8W0W6
25.9139	25.8075	25.8984	25.8124	26.3292	26.1301	26.0213	26.1276	0.00572377	0.0141701	0.293979	CSTF2	E9PID8;P33240;E7EWR4;A0A0A0MT56
20.3294	21.0049	21.0478	20.8884	22.3897	23.4967	22.1021	21.8912	0.00572282	0.0141942	1.65229	EPB41L5	Q9HCM4
21.7722	21.4856	21.5044	21.7428	22.7318	22.4383	23.7926	22.71	0.00576721	0.0144136	1.29198	PXN	F5GZ78;A0A1B0GTU4;P49023
29.5058	30.1036	30.0407	30.0006	30.5381	30.5384	30.4515	30.442	0.00602986	0.0145695	0.579813	DDX39A	O00148;K7EQN7
27.4977	26.0322	26.1268	26.1194	24.4817	25.0296	24.9367	23.7578	0.00602303	0.0145937	-1.89255	GBP1	P32455
22.48	23.246	23.5529	23.2703	24.1882	23.9149	24.2196	24.2539	0.00601221	0.0146179	1.00686	SYPL1	A0A0U1RQT9;C9JYN0;Q16563
29.8521	29.8971	29.7841	29.7208	30.0651	29.928	30.0732	30.1174	0.00617413	0.0146316	0.232395	NAMPT	P43490;A0A0C4DFS8
25.5709	26.1725	25.6511	26.0277	25.0598	25.1049	25.2875	25.3245	0.00600965	0.0146423	-0.661339	ARHGAP18	Q8N392
26.3618	26.5317	26.601	26.7897	25.8129	25.2943	26.1762	25.484	0.00616677	0.0146557	-0.879198	LIMD2	J3QQM5;Q9BT23;J3QL69;J3KRR0
24.7585	24.9258	24.8326	24.8285	24.4635	24.3149	24.6492	24.5781	0.00599713	0.0146667	-0.334938	ADPRH	P54922;C9JZW7
21.1174	21.2816	21.6654	22.0111	22.7966	22.3942	22.2058	22.6035	0.00615713	0.0146799	0.981157	CASK	Q5JS74;O14936
27.2605	25.573	25.4476	26.1899	28.0044	28.0928	27.6132	27.8845	0.00587019	0.0146847	1.78096	GSTM1	P09488;E7EWW9;B9ZVX7
25.4355	25.5006	25.7564	25.7597	25.1157	25.2282	25.1345	25.3354	0.00599123	0.0146912	-0.409616	LAMTOR1	Q6IAA8;F5GX19;F5H3Y3;H0YFI1;F5H479
23.754	24.1802	23.4381	24.0722	24.3711	24.8573	25.011	24.7856	0.00608202	0.0147041	0.895123	AATF	Q9NY61
30.4731	30.8457	30.8687	30.7022	31.107	31.1208	31.0794	31.1085	0.00583302	0.0147095	0.381501	FASN	P49327;A0A0U1RQF0
24.9432	24.4198	24.6634	24.667	25.2004	25.0803	25.5778	25.3231	0.006189	0.0147126	0.622059	MAD2L1	Q13257
23.4028	23.754	23.2558	23.1508	22.5054	22.7961	22.6226	22.937	0.00593466	0.0147157	-0.675522	CTSA	X6R5C5;X6R8A1;P10619
30.8758	31.0619	30.8538	30.7506	30.3959	30.5185	30.4768	30.6792	0.00582086	0.0147343	-0.367928	RPS2	P15880;H0YEN5;E9PQD7;I3L404;E9PMM9;E9PM36
24.2481	24.3772	24.4783	24.5252	23.0752	24.0072	23.66	23.2414	0.00593232	0.0147404	-0.911259	ACSL3	O95573
26.2849	26.7914	26.3702	26.8071	27.1818	27.0922	27.0996	27.2419	0.00593028	0.0147651	0.590453	CTBP1	Q13363;H0Y8W7;D6RAX2
21.0119	20.6235	21.2084	20.7647	21.8859	21.5056	21.7731	22.4731	0.00591931	0.0147899	1.00731	UXT	S4R2Z4;A0A0C4DFR8;Q9UBK9
24.9436	25.2792	25.0572	25.1593	25.5563	25.6562	25.8322	26.2655	0.00591103	0.0148148	0.717704	ZNF326	Q5BKZ1
25.5958	25.1696	25.09	25.236	24.6099	24.0876	24.8252	24.2393	0.00626742	0.0148393	-0.8323	FAM114A2	Q9NRY5;E7ESJ7
29.9963	30.3421	29.9708	30.02	30.4939	30.3901	30.4908	30.6642	0.00631022	0.0150507	0.42748	SHMT2	P34897;H0YIZ0
26.873	27.4041	27.2925	27.3876	27.9609	27.6693	27.8539	27.7568	0.00640366	0.0151307	0.57093	SLC3A2	F5GZS6;J3KPF3;P08195;F5GZI0
23.0995	24.8381	24.5977	24.2693	26.1057	25.873	25.734	25.6169	0.00646643	0.0151545	1.63128	OAS1	F8VXY3;P00973;H0YI20;F8VUC8
24.5623	23.8032	24.0448	24.35	23.3437	23.5147	23.341	23.6159	0.00646458	0.0151792	-0.73626	TRIM38	O00635
25.6503	25.6473	24.7423	25.0574	24.0493	24.307	24.422	24.3842	0.00644926	0.0152039	-0.983714	SRGN	P10124
28.0066	28.1866	28.0852	28.074	27.9776	27.879	27.817	27.83	0.00651708	0.0153506	-0.212208	ETFB	P38117;M0QY67
27.7749	27.3565	27.5971	27.5799	27.9866	27.895	27.9789	28.1981	0.00652553	0.0155721	0.437571	MYO6	A0A0A0MRM8;A0A0D9SGC1;E7EW20;Q9UM54
25.0954	25.3721	25.3118	25.4327	26.0045	25.6457	25.8924	26.3581	0.00659376	0.0156505	0.672129	RMDN1	Q96DB5;E5RH53;H0YB83;H0YC27;H0YC67;H0YBD9
25.7141	25.8321	25.844	26.1116	24.9035	25.4943	25.3595	25.2771	0.00663841	0.0157738	-0.616861	SEC22B	O75396
29.3538	29.0401	29.1213	29.135	29.4013	29.4291	29.6098	29.5646	0.00693143	0.0161154	0.338645	SEPT9	Q9UHD8
25.2182	24.9319	25.1699	25.2435	25.4099	25.5159	25.5014	25.7335	0.00682871	0.0161226	0.399319	SFXN3	A0A0A0MS41;A0A1P0AYU5;Q9BWM7;S4R3N9
26.7724	26.5008	26.7794	26.6902	27.1571	26.877	27.1106	27.0362	0.00691002	0.0161413	0.359526	SMU1	Q2TAY7
24.1122	23.1759	24.4427	24.4727	25.4488	25.207	25.2173	25.2936	0.00688758	0.0161672	1.24084	PRPF4B	Q13523;H0YDJ3
24.3802	24.214	24.4348	24.8264	24.8702	25.3807	25.4819	25.1499	0.00688637	0.0161932	0.756817	SF3B5	Q9BWJ5
20.6506	21.7994	22.1922	21.44	23.3746	23.1685	23.2106	22.4838	0.00695192	0.0162752	1.53882	LRRK2	Q5S007
21.4999	22.4554	21.5116	20.6525	22.7899	24.4072	23.7947	23.2545	0.0070707	0.0166571	2.03174	CMPK2	Q5EBM0
27.9736	28.2519	28.0127	28.246	28.4367	28.4654	28.3624	28.5152	0.00706997	0.0166837	0.323909	STAT6	P42226;A0A1W2PNW1
27.3122	27.2754	27.2517	27.22	27.4925	27.558	27.5141	27.3344	0.00711147	0.0167452	0.2099	EIF3D	O15371
31.7368	31.7751	31.936	31.8804	31.5531	31.5619	31.7059	31.5771	0.00723121	0.0167496	-0.232582	RPS27A;UBB;UBC	P62979;J3QS39;J3QTR3;F5H6Q2;F5GYU3;F5H2Z3;F5H265;B4DV12;F5H388;F5H747;F5GXK7;J3QKN0;Q5PY61;Q96C32;P0CG47;P0CG48
21.0523	21.5062	21.2581	21.0663	22.447	22.5849	22.4323	21.5524	0.00721725	0.016776	1.03341	IRF8	H3BRT4;H3BPS5;Q02556;H3BT31
25.506	23.9608	24.4541	25.0541	22.5345	23.7401	22.9821	22.9906	0.00713568	0.0168013	-1.68189	CD86	H7C4F8;P42081;C9JXS1
23.3285	22.8489	22.9722	23.085	23.3613	23.8023	23.5959	23.7796	0.0072096	0.0168025	0.576114	NR3C1	P04150
24.8009	24.9412	24.7484	25.062	25.2603	25.452	25.1133	25.4401	0.00720071	0.0168291	0.428288	NAA25	Q14CX7
30.1975	30.2217	29.98	29.9896	30.3238	30.342	30.4346	30.4606	0.0071531	0.0168381	0.293038	DARS	P14868
26.5774	26.6649	26.8152	26.469	27.0388	26.8671	27.0496	27.2276	0.00719139	0.0168558	0.414146	ACTL6A	O96019
24.7273	24.9202	25.3402	25.0801	25.6263	25.4637	25.6486	25.9513	0.00729379	0.0170566	0.655546	RNASEH2A	O75792
24.4621	24.3608	24.6274	24.5755	24.6784	24.9743	25.1102	25.0559	0.00744904	0.0170712	0.448223	CAPN2	P17655
25.4908	26.0083	25.9478	25.8436	26.3664	26.1708	26.4607	26.3685	0.00739119	0.0170807	0.518964	CDC2L1;CDK11B;CDK11A	B7ZVY7;J3QR44;P21127;J3QR29;A0A0D9SEI3;A0A0D9SER5;A0A0D9SEN2;Q9UQ88;Q5QPR4;Q5QPR3
23.8248	24.734	23.5241	24.2003	25.3253	24.869	25.3413	25.2404	0.00740668	0.0170977	1.12316	RBM42	K7EP90;Q9BTD8;K7EQ03;K7EML2;K7ER08
28.3667	28.3664	28.6103	28.1828	28.8939	28.7378	28.6669	28.9119	0.00738827	0.0171073	0.421109	HNRNPAB	D6R9P3;D6RD18;D6RBZ0;Q99729
29.2757	28.9776	29.0946	29.0534	29.386	29.5479	29.3651	29.3467	0.00736694	0.017117	0.311114	SEPT7	E7ES33;E7EPK1;Q16181;G3V1Q4
24.8758	23.812	24.1076	24.15	21.9176	22.0787	23.6052	21.9483	0.00738185	0.017134	-1.84888	TMEM205	K7ELQ9;Q6UW68;K7EM09;K7EPR0
28.0945	28.0388	27.9653	27.9878	28.4081	28.2704	28.2584	28.6436	0.00734425	0.0171437	0.37349	IDH3B	A0A087WZN1;O43837;A0A087X2E5
30.4266	30.1813	30.1722	30.3259	30.9058	30.6493	30.4967	30.8723	0.00733845	0.0171706	0.454506	PARP1	P09874
20.0088	21.6115	23.6338	20.9949	17.4081	18.4176	19.0887	17.8715	0.00731975	0.0171975	-3.36577	JCHAIN;IGJ	D6RD17;P01591;D6RHJ6
26.8983	25.912	26.3257	26.3844	25.302	25.814	25.1345	25.0328	0.00731964	0.0172245	-1.05928	ATOX1	E5RGN3;E5RIM7;O00244
26.7187	26.1226	26.1517	26.1651	25.721	25.8196	25.5603	25.6596	0.00789577	0.0175183	-0.599385	BCKDHA	F5H5P2;P12694;F5GXU9
33.2071	33.2951	33.2074	33.1882	33.0654	32.8889	33.1074	32.9236	0.0078908	0.017545	-0.228121	LCP1	P13796
28.4492	28.1864	28.3354	28.2513	28.6753	28.4804	28.583	28.7434	0.00788262	0.0175719	0.314962	CSK	P41240
26.9752	23.8588	25.2519	25.4369	22.6547	22.4175	22.0199	23.4026	0.00767562	0.0175877	-2.75703	ETHE1	M0QXB5;O95571
25.62	25.4027	26.4634	26.5364	27.0015	27.1964	27.1399	27.3427	0.00787378	0.0175988	1.16451	STMN2	E5RGX5;Q93045
24.2329	24.978	24.7804	24.6336	25.5983	25.5048	25.1934	25.2501	0.00766489	0.0176148	0.730433	SP140	Q13342
26.8148	27.2611	27.1424	27.2244	27.4076	27.5814	27.6687	27.7536	0.00785552	0.0176258	0.49216	NUDT21	O43809;H3BND3
28.631	28.9063	28.8442	28.8217	29.1568	29.0213	29.0077	29.1636	0.00766198	0.017642	0.286566	SF3B1	O75533
25.3273	25.4458	25.3913	25.2838	25.6075	25.464	25.5406	25.5707	0.00780657	0.0176528	0.183648	TBC1D5	Q92609;C9J3F6
27.0406	26.8622	27.258	27.1955	26.7205	26.5966	26.8062	26.6791	0.00760581	0.0176692	-0.388469	ADK	P55263
25.8171	25.9109	26.0397	26.0269	26.2998	26.339	26.1967	26.1091	0.00805307	0.0176909	0.287522	NUP205	Q92621
25.4115	25.8039	25.3947	25.3698	24.8897	24.3813	24.9308	24.0193	0.0080334	0.0177178	-0.939679	EBI3	Q14213
29.3288	29.5303	29.3267	29.3918	29.5935	29.5659	29.583	29.6817	0.00801686	0.0177447	0.21165	IARS	P41252;A0A0A0MSX9;J3KR24
24.1044	23.5433	23.3597	23.5526	22.9133	22.3889	22.4221	23.1015	0.00809235	0.017767	-0.93358	HOOK3	Q86VS8
26.9657	27.2616	27.08	27.1928	27.3462	27.3641	27.4985	27.5106	0.00796104	0.0177717	0.304847	SLC25A4	P12235;V9GYG0
24.1116	24.0699	23.5526	24.0473	24.8975	24.272	24.8243	24.8842	0.00817601	0.0180967	0.774135	RPE;RPEL1	Q96AT9;C9J9T0;C9IZU8;Q2QD12
28.3582	28.4182	28.3129	28.3174	28.5076	28.6571	28.4921	28.4856	0.00823688	0.0182081	0.183959	NAA15	Q9BXJ9;A0A0B4J1W3
24.8822	24.824	24.7196	24.6708	25.0562	25.0341	25.1648	25.4305	0.00835988	0.0186145	0.397275	TBC1D15	Q8TC07;C9JA93
25.2764	25.0731	25.0688	24.73	24.6111	24.4332	24.5417	24.6589	0.00838984	0.0186787	-0.475878	CTH	P32929
30.5915	30.4601	30.6326	30.4779	30.6856	30.7256	30.7291	30.831	0.00838536	0.0187068	0.202293	MTHFD1	P11586;F5H2F4
21.8736	22.4404	22.2392	22.4187	23.0425	22.7698	22.8211	22.6819	0.00841137	0.0187586	0.585836	LANCL2	Q9NS86
24.1821	24.5553	24.7408	24.3581	24.9717	24.9682	24.8776	25.2397	0.00841545	0.0187844	0.555212	YLPM1	P49750;H0YIQ2;F8VU51
25.3049	25.5251	25.5756	25.418	25.1152	25.0163	24.7775	24.4483	0.00844162	0.018852	-0.616573	PDLIM5	Q96HC4;H0Y8Y3;H0YBI4
23.5297	23.699	23.6163	23.8287	24.1839	23.8287	24.0962	24.1144	0.00848314	0.0188571	0.387381	GALE	Q14376;Q5QPP3;Q5QPP4;Q5QPP9;Q5QPP1
27.7096	27.7076	27.5862	27.5252	28.2285	27.8327	28.0727	28.4123	0.00847766	0.0188852	0.504396	RALY	Q5QPL9;Q9UKM9;Q5QPM1;Q5QPM0
27.6727	28.2441	28.1465	27.9449	27.3436	27.4184	27.4421	27.6364	0.0084732	0.0189134	-0.541925	EHD4	Q9H223
27.1789	26.7824	26.5905	26.5348	25.5627	25.4203	25.8711	26.3516	0.00852302	0.0189911	-0.970273	IL16	Q14005;H0YLH9
28.4288	28.9818	28.7653	28.6647	29.1738	29.0858	29.2044	29.1879	0.00851649	0.0190193	0.452818	GART	P22102
23.2258	22.7162	22.8233	22.7828	23.3685	23.2734	23.5865	23.7612	0.00856038	0.0190533	0.61038	FASTKD5	Q7L8L6
28.315	28.0419	28.1201	28.1043	28.3611	28.3652	28.4364	28.5489	0.00854011	0.0190815	0.282574	QARS	P47897
24.2518	24.4957	25.0649	24.2216	23.4233	23.8419	23.774	23.187	0.00865381	0.0191492	-0.951916	SRP19	A0A087WYR0;P09132;A0A087WWU9
25.2475	25.6487	25.0428	24.8511	24.5033	24.5242	24.617	24.2106	0.00876676	0.0191811	-0.733742	UBXN7	O94888;C9JAT7
24.0505	22.974	23.2564	22.8903	24.0931	24.3882	24.4583	24.5522	0.00871047	0.0192094	1.08015	WDHD1	O75717
22.8244	22.6057	22.8103	22.8097	23.126	23.2084	22.8924	23.1758	0.0087995	0.0192471	0.338166	ACYP1	G3V2U7;P07311
33.2597	33.1487	33.3145	32.9497	32.9086	32.8602	32.7894	32.6904	0.00887547	0.0194361	-0.356004	PFN1	P07737;K7EJ44
29.1994	28.7861	28.9591	28.6934	27.8159	28.0877	28.1191	28.6035	0.00893674	0.0195836	-0.752939	RPL21	P46778;M0R181;G3V1B3
25.8902	25.3141	24.6061	24.8419	23.7686	23.2437	23.9118	24.2943	0.00894789	0.019672	-1.35849	FCRLA	Q7L513
27.0842	27.0645	27.2895	27.1079	26.7804	26.6484	26.9146	26.9302	0.00900391	0.0198538	-0.318083	DCTN1;DKFZp686E0752	E7EX90;Q14203;Q6AWB1
23.7292	24.6026	24.2494	24.1455	24.9243	24.7927	24.9524	24.8398	0.00907057	0.0198834	0.695621	QRICH1	Q2TAL8
24.4514	25.1492	25.1404	25.326	25.6036	25.9022	25.9939	26.3857	0.00904749	0.0199124	0.954587	NGLY1	A0A0C4DFP4;Q96IV0
26.7766	26.3022	26.5406	26.3226	26.9392	26.9788	27.2038	27.5627	0.00908989	0.0199592	0.685619	MSH2	P43246;E9PHA6
26.4591	26.5572	27.1352	26.7746	27.1863	27.5452	27.599	27.3039	0.00916016	0.0199942	0.677122	SRSF9	Q13242;H0YIB4
24.9351	25.2563	24.9441	24.4977	25.4285	25.4664	25.5784	25.6139	0.00912418	0.0200233	0.613496	STX7	O15400
22.4867	21.0472	22.4105	22.7274	23.6789	23.5142	23.5261	23.7705	0.0091686	0.0200464	1.45448	OASL	Q15646
25.9679	26.3694	26.0775	25.9455	26.6242	26.6321	26.3339	26.5943	0.00920128	0.02011	0.456049	WDR77	Q9BQA1;H0Y711
29.3987	29.3904	29.5136	29.2894	29.6672	29.5157	29.6854	29.621	0.00933887	0.0203121	0.224279	TRIM28	Q13263
23.0159	23.382	23.5181	23.3083	22.1666	22.3279	22.6433	22.9727	0.0094902	0.0205122	-0.778449	SZRD1	Q7Z422
27.4576	27.8176	27.8611	27.6581	28.4629	28.1334	28.4462	27.9877	0.00948726	0.0205418	0.558944	DDX39B	Q13838;Q5STU3;A0A0G2JJZ9;F6WLT2;A0A140T9X3;A0A0A0MT12;F6TRA5;A0A140T9X9;A0A140T996;F6S4E6;F6UJC5;A0A140TA18;A0A140T973;A0A140T9K1
22.0172	20.859	21.3867	21.4721	22.6688	22.6172	22.3624	22.1213	0.00945381	0.0205714	1.00862	PON2	J3QT77;A0A0J9YYG4;A0A0J9YXF2;Q15165
23.71	24.6781	24.8205	24.4674	23.3945	23.6036	23.3526	23.5174	0.00949929	0.0205862	-0.951953	CD79A	P11912
28.6518	28.711	28.6563	28.738	29.0314	28.7603	28.9583	28.9211	0.00958298	0.0207611	0.228486	HPRT1	P00492
22.3686	22.4196	21.8765	21.0058	23.678	23.6292	23.4223	22.7685	0.00955287	0.0207908	1.45688	GTF3C2	Q8WUA4;H0Y4Q6;H7C3X9
25.014	24.9036	23.8725	24.0741	25.6409	25.6827	25.7171	25.3389	0.00952122	0.0208207	1.12881	KDM3B	Q7LBC6
28.1439	28.2744	28.318	28.1649	28.3595	28.3973	28.441	28.5224	0.00963983	0.0208229	0.204738	GMPS	P49915
23.237	23.8545	23.9725	24.1086	24.5793	24.382	24.8573	25.1372	0.00969979	0.0211184	0.945809	POLDIP3	F6VRR5;Q9BY77
24.3256	24.7031	24.4725	24.1488	24.7544	24.8812	25.0192	24.9148	0.00998106	0.0212978	0.479904	DNAAF5	Q86Y56;H0Y650
23.9016	23.5732	23.3169	23.606	24.0234	24.7578	24.2424	24.2885	0.00975309	0.0213105	0.728597	SAAL1	J3KND1;E9PRZ1;Q96ER3;H0YCN7;H0YEK5;E9PMD2
27.9022	27.8741	28.026	27.7825	28.0476	28.1411	28.2434	28.3305	0.00995604	0.0213277	0.294464	SNX2	O60749
27.5507	27.7508	27.6514	27.6165	27.4949	27.3715	27.4979	27.4416	0.00976277	0.0213371	-0.190864	APEH	C9JIF9;P13798;H7C393
23.5746	23.6889	23.6214	23.22	24.473	23.9528	23.9287	24.4093	0.00992395	0.0213577	0.664713	GABPA	Q06546
23.9156	23.237	22.9773	23.3697	23.9199	24.195	24.4369	24.5436	0.00984094	0.0213674	0.89892	RDH13	Q8NBN7;K7EMY5;G8JLA1
25.8042	25.8398	25.8143	26.0966	26.2069	26.1209	26.2554	26.4597	0.00991366	0.0213879	0.372028	PPAT	Q06203
25.9066	26.0227	25.9197	26.0424	26.1798	26.4211	26.2452	26.6288	0.00984732	0.0213975	0.395882	SNX6	A0A0A0MRI2;Q9UNH7;G3V5X9
29.1975	28.9701	29.0675	28.9646	28.5522	28.8936	28.6976	28.486	0.00983703	0.0213977	-0.392635	RAB11B;RAB11A	Q15907;H3BMH2;H3BSC1;P62491
25.6667	26.05	25.8932	25.7549	26.1918	26.1119	26.1557	26.3245	0.00990941	0.0214181	0.354765	SEC24A	O95486
27.1594	27.3961	27.2794	27.1865	26.7863	26.8483	26.9024	27.1259	0.00984512	0.0214278	-0.339616	NUCB1	Q02818;H7BZI1;C9JKZ2
26.4372	26.2147	26.3548	26.6292	25.7364	25.7962	26.1598	26.0099	0.0100516	0.0214678	-0.48344	CLIP2	Q9UDT6
26.0922	26.0182	26.1724	26.5317	25.5263	25.9448	25.4258	25.4842	0.010021	0.0214979	-0.608366	SNAP23	O00161;H3BNE1;H3BR18;H3BM38;H3BPJ0
21.517	22.3159	22.1326	22.0841	22.5988	22.5904	22.9102	23.1106	0.01021	0.0215063	0.790101	KATNA1;KATNAL1	O75449;B7ZBC8;Q9BW62
28.5586	28.8261	28.6617	28.664	29.0477	29.2263	28.872	28.9536	0.0101897	0.0215363	0.347274	HNRNPR	O43390;B4DT28
26.4883	26.844	26.9509	26.6426	26.4196	26.302	26.3226	26.2994	0.0101481	0.0215664	-0.395559	GMPPB	Q9Y5P6
24.2572	23.6271	23.5497	23.3382	22.5894	22.8041	22.5646	23.1951	0.0102991	0.0216435	-0.904782	GTPBP10	A4D1E9;C9J8R7;C9JNI1
29.347	28.9917	29.0346	29.1996	29.3667	29.4788	29.513	29.5821	0.0103548	0.0217803	0.341937	SEPT6	B1AMS2;Q14141
21.9775	22.2956	22.173	22.3712	22.892	22.9931	22.5476	22.5302	0.0104942	0.022	0.536379	INTS6	Q9UL03;C9JVX2
23.7327	24.3083	24.4011	24.4221	25.6614	24.8241	25.8583	24.9627	0.0104469	0.0220056	1.11056	NUDCD2	Q8WVJ2;E5RFP0
24.4392	24.8009	25.1844	24.6379	23.9743	23.638	24.1099	24.2799	0.0104627	0.0220305	-0.765064	GNS	H7C3P4;F6S8M0;P15586;F5H4C6;H0YFA9
22.5395	24.8846	23.5174	23.4194	22.2304	21.5935	21.3888	21.5688	0.0106101	0.022213	-1.89484	HLA-DMA	F6S093;A0A140T9N4;A0A140T9N2;A0A140T9E7;A0A140T9D1;A0A140T9C7;A0A140T995;A0A140T985;Q5SP00;A0A140T9G2;A0A140T9T2;A0A140T9H8;H0Y732;A0A140T9X4;A0A140T9V7;A0A140T9T3;A0A140T9N9;A0A140T9N7;A0A140T9K8;P28067
24.6493	25.1441	24.8157	24.9285	25.3279	25.3287	25.2375	25.6482	0.0107657	0.0224628	0.501196	UPF2	Q9HAU5
28.8251	28.5222	28.6933	28.6328	28.8757	28.9223	29.0461	29.1758	0.0107474	0.0224938	0.336593	LMNB2	Q03252
24.5904	24.9091	24.6801	24.7745	23.8489	24.4247	24.2784	24.3108	0.0107804	0.0225	-0.522781	SPRYD4	Q8WW59
28.5537	28.457	28.4358	28.4413	28.6374	28.5522	28.7112	28.7587	0.0107257	0.0225249	0.192918	TPR	P12270
24.2447	22.9089	21.6229	21.3427	18.1802	19.166	20.5585	19.9528	0.0107786	0.0225309	-3.06544	HMGN4	O00479
21.6849	21.3781	21.512	21.8891	21.9768	22.013	22.0987	22.299	0.0107884	0.0225569	0.480876	MCM3AP	O60318
22.9763	23.8122	23.1202	23.4153	22.3682	22.6467	22.5974	22.7659	0.0108828	0.0225973	-0.736446	LDAH;C2orf43	B5MDU6;Q9H6V9;C9JHU6;C9JUM0;B5MCU4;A0A0A0MSH6
20.9128	20.9958	21.5055	21.6411	22.0289	21.7665	22.0362	22.0378	0.0109063	0.0227031	0.703544	POLA1	A0A087WU64;A6NMQ1;P09884
23.8593	23.3079	23.9208	23.6753	24.3437	24.0383	24.2984	24.3899	0.0109281	0.0227268	0.576772	NTPCR	Q9BSD7;Q5TDF0
29.2276	29.1494	29.3383	29.1893	29.3881	29.437	29.6821	29.6838	0.0109552	0.0229304	0.321568	FKBP4	Q02790
22.645	22.5971	23.1396	23.0829	19.6553	22.1797	21.1258	20.5598	0.0109865	0.0229551	-1.98598	GPATCH8	Q9UKJ3;K7EKU0
26.3303	26.7113	26.7818	26.6812	26.2938	26.2017	26.2791	26.0357	0.0110589	0.0229728	-0.423614	ATP1B3	P54709;C9JA36
27.7098	27.654	27.9883	27.6824	27.9618	28.0821	28.1078	28.1501	0.010978	0.0229864	0.316814	RAD50	Q92878
27.0172	26.8409	26.8505	27.0071	27.399	27.0315	27.3156	27.353	0.011248	0.0230108	0.345857	DCPS	Q96C86
29.6664	29.2909	29.3426	29.2991	28.9374	29.1795	28.7005	28.7489	0.0112729	0.0230337	-0.508184	COX4I1	P13073;H3BN72;H3BNV9;H3BPG0;Q86WV2
23.8035	22.6047	22.1723	23.0558	21.2893	18.0883	20.2589	20.7184	0.011234	0.0230419	-2.82035	HLA-B	P30491;P10319;A0A140T9G0
30.9333	30.4587	30.4052	30.8454	31.0116	31.2467	31.2474	31.4144	0.0110865	0.0230502	0.569383	ALDOC	P09972;A8MVZ9;J3KSV6;J3QKP5;C9J8F3
26.1536	26.3232	26.1437	26.0237	26.6773	26.3518	26.5816	26.8999	0.0112107	0.0230732	0.466627	THYN1	Q9P016
24.82	25.42	25.5337	25.237	25.8162	25.8331	25.7779	25.853	0.0113139	0.0231267	0.567414	DBN1	Q16643;D6R9W4
27.1486	26.668	27.1126	27.2016	26.5169	26.7169	26.3312	26.2524	0.0113967	0.0232948	-0.578358	IVD	A0A0A0MT83;P26440
21.9029	23.0384	23.117	22.4474	23.467	23.6853	23.841	23.7515	0.0114201	0.0233172	1.05977	UNG;DKFZp781L1143	F5GYA2;P13051;Q68DM5
24.6672	25.2179	24.2465	24.8007	25.7421	25.4563	25.2879	25.6995	0.0115575	0.0234064	0.813416	RBM10	A0A0A0MR66;P98175
24.9232	24.6948	24.6116	24.4905	25.2943	25.1818	24.9129	25.0837	0.0114498	0.0234316	0.438137	HS2ST1	Q7LGA3
29.9658	28.5387	28.8581	28.5304	26.4146	27.5996	27.9826	26.8157	0.011526	0.0234378	-1.77013	RPL19	J3QR09;J3KTE4;P84098
25.6868	26.1912	25.8207	26.1281	26.6182	26.4026	26.5046	26.2997	0.0114243	0.0234631	0.499594	USP11	G5E9A6;P51784
24.3012	24.6292	24.2025	24.1108	23.8547	23.2733	23.8973	23.6058	0.0116672	0.0237284	-0.653203	SLC35A4	L0R6Q1
28.4698	28.6421	28.3587	28.1556	27.3122	27.7142	27.8279	28.0726	0.0116481	0.0237543	-0.674825	RPL22	P35268;K7ELC4;K7EMH1;K7ERI7
25.5537	25.5157	25.1824	25.7292	25.8419	25.9724	26.4087	26.3798	0.0116646	0.02376	0.65548	MTA1	Q13330;E7ESY4;H0Y4T7
27.6876	27.5979	27.4084	27.4972	27.8501	27.7716	27.8335	28.1082	0.0117028	0.0238138	0.343072	CTPS1	P17812
25.9429	26.3867	26.3107	26.046	26.8937	26.6019	26.5916	26.5151	0.0118981	0.023905	0.478971	MRPL38	Q96DV4
26.0148	25.7183	25.9267	26.0054	26.3279	26.1613	26.7132	26.3815	0.0118905	0.0239366	0.479644	SEH1L	Q96EE3;K7ELV2;K7EP88;K7ENI5
26.1896	25.04	26.068	26.1334	25.1268	24.6932	24.2695	24.7068	0.0118344	0.0239416	-1.15866	TRAF1	Q13077
33.0116	33.2233	33.2028	32.912	32.7391	32.7397	32.8196	32.8759	0.0118803	0.0239629	-0.293858	HSP90B1	P14625
26.2512	26.8196	26.3446	26.3695	25.851	25.5669	25.9903	26.0299	0.0118894	0.0239683	-0.586734	LAMP1	P11279
27.2227	27.5826	27.5075	27.4515	27.659	27.7129	27.8132	27.8163	0.0118532	0.0239947	0.309284	UPF1	Q92900
29.8664	29.9904	29.9894	30.0655	30.1772	30.2184	30.1038	30.3478	0.0119388	0.0240474	0.233884	ILF3	Q12906
25.6726	25.7473	25.8034	26.0244	26.2684	25.9929	26.3981	26.5204	0.0120817	0.0242895	0.483027	TSNAX;DISC1	Q99598;Q5VVQ1;C4P0D6;C4P0D8
26.0898	26.5238	26.0687	26.1689	25.7044	25.9336	25.6728	25.4134	0.012197	0.0244078	-0.531784	RAB2A	P61019;E9PKL7
30.7331	28.9123	29.706	29.5188	27.2582	28.4302	28.2087	28.3626	0.0121933	0.0244398	-1.65267	HIST1H1C;HIST1H1D	P16403;P16402
28.0846	28.1883	28.0607	28.0073	27.8161	27.9148	27.6869	27.4757	0.0121876	0.0244718	-0.361845	LTA4H	P09960
20.4699	19.0714	20.52	20.8669	21.5157	21.7384	22.0711	21.5265	0.0121241	0.0244993	1.48084	BIVM-ERCC5;ERCC5	A0A1W2PS85;R4GMW8;P28715
25.4525	25.5504	25.5058	25.5323	26.0048	25.5874	25.8464	25.9526	0.0121765	0.0245039	0.337549	IPO7	O95373
22.0542	22.44	22.5091	22.6452	22.8778	22.9837	22.8565	22.801	0.0123248	0.0246346	0.467597	RIF1	Q5UIP0;H7BZN3
25.6474	25.9716	25.5214	25.2974	26.3624	25.9449	26.1994	26.3353	0.0123047	0.0246467	0.601012	SRSF4	A0A0D9SEM4;Q08170
26.6576	26.2199	25.9954	26.1511	25.629	25.6592	25.899	25.4616	0.0123201	0.0246667	-0.593777	MAP2K2	P36507;G5E9C7;A0A1B0GUL7
21.4414	21.4988	22.1791	22.0655	22.5436	22.648	22.729	22.2822	0.0122997	0.0246789	0.754505	TFIP11	Q9UBB9
24.2516	24.0343	24.084	24.0949	23.8637	23.34	23.6163	23.0335	0.0123542	0.0246857	-0.652816	ISCU	Q9H1K1;F5H5N2;B4DNC9;B3KQ30
26.3258	26.41	25.8973	25.8619	26.5828	26.6067	26.6483	26.8777	0.0124346	0.0247907	0.555111	GLYR1	Q49A26;K7EMM8;K7EQB2
32.9742	32.4435	31.9302	32.0073	31.2537	31.2789	31.4917	31.6715	0.0124164	0.0248187	-0.914889	ACTA1;ACTC1;ACTA2;ACTG2	P68133;P68032;P62736;P63267;A6NL76
25.1283	25.4861	25.3468	25.2545	25.762	25.4679	25.7326	25.6691	0.0124277	0.0248228	0.353988	NUPL1	Q5JRG1;H7BYF2;Q9BVL2
23.6049	24.0608	24.3123	24.2322	22.9252	23.7187	22.966	23.1937	0.0124079	0.0248508	-0.851644	MRPL27	D6RAN8;Q9P0M9;H7C5U8
26.6568	27.0949	27.0526	27.0667	27.1819	27.5506	27.5314	27.6048	0.0124865	0.0248918	0.499451	LSS	P48449;A0A0G2JQD0
28.6922	28.7428	28.6509	28.7709	28.9101	28.9295	29.0508	28.7949	0.0124741	0.0249239	0.207096	EIF3M	Q7L2H7;J3KNJ2;H0YCQ8
25.5831	25.7723	25.7001	25.5342	25.309	25.3496	25.0514	24.7297	0.0125705	0.0250862	-0.537522	DAP3	P51398;V9GYL9;V9GZ61;V9GYA7;V9GZ03;V9GYJ9
24.0815	23.7159	23.6872	24.7607	23.1843	21.932	23.1233	22.6379	0.0126816	0.0252632	-1.34195	NOP9	Q86U38
26.8635	27.338	27.4755	27.2083	26.3615	26.835	26.1207	26.6722	0.0127125	0.0252769	-0.723985	GLS	O94925
27.5592	27.4066	27.4592	27.0707	27.6048	28.2226	28.276	27.9995	0.0126749	0.0252956	0.651801	MARCKSL1	P49006
26.177	26.8621	26.6527	26.5756	27.1584	27.0621	26.9765	27.1785	0.0128859	0.0259155	0.52703	TXNRD1	E9PIR7;F8W809;A0A087WSW9;A0A182DWI3;A0A087WSY9;Q16881;E2QRB9;E9PKD3
23.9436	23.9482	23.8131	23.8418	23.516	23.5296	23.5845	23.8198	0.0130921	0.0263857	-0.274221	VPS13A	Q96RL7
24.8952	24.4533	25.1134	24.5338	24.3258	23.9299	23.8213	23.325	0.0130527	0.0264194	-0.898376	COMMD2	Q86X83;F8WBW1;F8WC41
26.7907	26.4021	26.4251	26.4846	27.0222	26.8238	26.8217	26.8521	0.0132437	0.0265006	0.354337	RBM4;RBM4B	Q9BWF3;E9PB51;Q9BQ04;D6R9K7;J3QRR5;E9PLB0;E9PM61;U3KQD5
25.6417	26.037	26.186	25.9351	26.4103	26.2707	26.351	26.4872	0.0132387	0.0265344	0.429866	CPSF3	G5E9W3;Q9UKF6
18.5712	19.6256	18.8773	19.182	21.3222	20.9419	19.8015	20.0699	0.0132225	0.0265682	1.46983	SNRNP35	Q16560
27.2797	27.8617	27.6774	27.9184	27.0619	27.0509	27.1585	27.3017	0.0131882	0.026602	-0.541044	STAT5A	K7EK35;P42229
24.8808	25.3777	25.2536	25.002	25.6978	25.3982	25.5935	25.6444	0.0133095	0.0267614	0.454944	PREX1	Q8TCU6
26.6384	26.9775	27.1043	26.8692	27.2902	27.2403	27.4765	27.793	0.0133587	0.0269404	0.552639	TCEA1	A0A1W2PPZ5;P23193;A0A1W2PRL9
22.0044	23.8962	23.8821	23.7719	21.3193	21.8385	21.4334	22.0913	0.0133753	0.0269532	-1.71806	GRN	K7EQ05;P28799;K7EQI0;K7EKL3
30.8423	30.6456	30.772	30.832	30.3773	30.5318	30.4188	30.6672	0.0133746	0.0269873	-0.274192	VDAC1	P21796;C9JI87
26.1573	26.3757	26.739	26.8162	25.7584	25.9555	26.0425	26.0116	0.0134479	0.0271869	-0.580008	RBM3	P98179
26.2118	26.2563	25.9171	26.2672	26.3361	26.6934	26.5594	26.6926	0.0136711	0.0279042	0.407281	SH3GLB2	B7ZC39;B7ZC38;Q9NR46
27.4904	27.5376	27.5186	27.6485	27.7515	27.6369	27.7441	27.8668	0.0137006	0.0279195	0.201072	YWHAH	Q04917;A2IDB2
26.649	26.4219	26.4986	26.2792	25.6811	25.765	26.0082	26.2729	0.0136923	0.0279547	-0.530377	SUMF2	J3KQJ1;Q8NBJ7;C9J660;H7C3B2;A8MXB9;F8WA42;C9JL30;E9PBT8;E9PG02;J3QT17
25.7519	25.9969	25.6758	25.5908	26.4415	25.9393	26.2138	26.3337	0.0138168	0.0279799	0.478203	DCXR	J3KS22;Q7Z4W1;J3QS36;J3QL34
27.7532	27.3265	27.5051	27.5713	27.8637	27.8604	27.7867	27.9079	0.0137449	0.0279849	0.315614	HDGF	P51858
28.0126	27.9186	28.0068	28.1256	28.3836	28.4275	28.3256	28.0963	0.0138123	0.0280151	0.292387	HNRNPUL1	Q9BUJ2;A0A0A0MRA5;B7Z4B8;M0R3F1;M0QYZ0
27.1478	26.7743	26.4193	26.367	27.5188	27.2119	27.3503	27.2767	0.0138871	0.028035	0.662318	SAE1	Q9UBE0;M0QZS6;B3KNJ4;M0QX65
28.4474	28.6795	28.6295	28.6029	28.9012	28.691	28.8527	28.9548	0.013957	0.028235	0.260096	GOT1	P17174
24.3183	24.1722	24.3612	24.4191	24.848	24.7997	24.6718	25.4585	0.0140782	0.0283795	0.626786	MRPS6	P82932
27.7078	28.4937	28.5226	28.3598	27.603	27.7042	27.4414	27.6225	0.0142968	0.0287821	-0.678189	GPX1	A0A087WUQ6;P07203
26.0116	24.7131	25.0123	24.3774	23.9424	24.0181	23.4929	23.3052	0.0142921	0.028818	-1.33896	DNAJC3	X6R9L0;Q13217
24.1709	24.1987	23.9189	23.8971	24.6085	24.3099	24.81	25.1845	0.0144221	0.0288377	0.681856	HMGN5	P82970;Q5JSK8;Q5JSL0;Q5JSK6
20.8461	21.3323	21.6428	22.4213	22.4014	22.966	22.8399	22.8456	0.0143679	0.0288398	1.20257	MCEE	Q96PE7;F5GZ54;H7BZS7
23.4697	23.8784	23.697	23.2822	24.2402	23.8752	24.1471	24.4225	0.0144147	0.0288734	0.589413	BABAM1	Q9NWV8;M0R3F4;M0R2A4;M0R2K3;M0R193;M0R0I0;M0R2I2;M0QYV1;J3KQS6
26.9577	26.5213	26.5211	26.5859	27.3022	27.1358	26.9903	26.9519	0.0143625	0.0288756	0.448538	MYH10	P35580
23.9334	24.4362	24.4611	24.5936	24.9337	24.827	24.8207	24.8499	0.0144258	0.0288812	0.501727	GK;GK3P	P32189;Q14409
28.975	29.3094	29.1277	29.0467	29.3864	29.3277	29.341	29.4428	0.0146085	0.0291372	0.259806	SF3B3	Q15393
23.9158	23.7446	23.9823	24.3478	24.4925	24.336	24.4659	24.7	0.0146292	0.0291901	0.500981	DDHD2	O94830
25.582	25.3947	25.2467	25.578	26.5396	25.7083	26.0142	26.1121	0.0146923	0.0294106	0.643205	NOL6	Q9H6R4;A0A0A0MRW6
23.0697	23.2849	23.4749	23.3042	23.7298	23.946	23.479	23.6953	0.0147017	0.0294236	0.429089	PUM2	A0A0C4DG68;A0A0A0MR59;Q8TB72
27.6317	27.3238	27.3416	27.4563	27.2562	26.8375	27.003	27.1196	0.0148125	0.0295252	-0.384263	C17orf49;BAP18;RNASEK-C17orf49	F8W038;Q8IXM2;H0YIS7;F8W1H0
24.6382	23.2807	22.9762	22.6894	21.5305	21.4441	22.381	20.6009	0.01486	0.0297002	-1.90701	FUT8	Q9BYC5;G3XAD2
25.4549	26.0755	25.9926	25.9387	26.4587	26.3772	26.3138	26.2737	0.0149944	0.0298725	0.4904	BAT3;BAG6	A0A024RCR6;A0A0G2JK23;P46379;A0A0G2JL47;X6REW1;A0A0G2JJM1;F6S6P2
24.8693	24.2103	24.5229	24.4098	23.3971	23.2331	20.6554	21.4644	0.0149874	0.0299092	-2.31556	RPF2	Q9H7B2;Q5VXN0
29.7781	30.053	29.8583	29.8392	30.0991	30.1312	30.0308	30.13	0.0149981	0.0299143	0.21566	PHB	P35232;C9JW96;C9JZ20;E7ESE2;E9PCW0
28.6597	28.6452	28.5128	28.5427	28.8022	28.7195	28.7943	29.0052	0.0150917	0.0299413	0.240172	HK1	P19367
25.6208	26.0399	25.9041	25.9038	26.1598	26.2232	26.1089	26.216	0.0151638	0.029949	0.309843	NUP54	Q7Z3B4
28.2489	28.5955	28.2508	28.2701	28.5675	28.8588	28.6212	28.8495	0.0151327	0.0299854	0.382919	SRSF6	Q13247
23.3498	23.3059	24.1139	23.9319	22.8416	23.0914	22.7626	23.0547	0.0151871	0.0299903	-0.737793	CTSZ	Q9UBR2
23.2886	23.3339	23.1698	23.6093	23.6543	23.6727	23.8223	24.0844	0.0151297	0.0300219	0.458043	STAM2	O75886
23.7827	23.9361	24.0259	24.2434	22.6451	22.6254	23.2671	23.7038	0.0151286	0.0300585	-0.936649	DDX54	Q8TDD1;F8VRX4
26.0762	26.1597	26.1114	26.0801	25.7537	25.6457	25.1019	24.7545	0.0151172	0.0300952	-0.792887	TMED5	Q9Y3A6;M0R072;B1AKT3
25.5251	25.7701	25.9568	25.7752	26.107	26.2541	26.0025	26.0569	0.0153008	0.0303758	0.348328	ALDH16A1	Q8IZ83;F5H4B6
24.5697	25.389	25.1247	24.9416	24.4737	23.2636	23.8053	24.2342	0.0153191	0.0304019	-1.06206	OSBPL3	Q9H4L5
22.4374	23.3106	23.2657	23.1729	22.4175	21.8349	21.801	22.467	0.0153538	0.0304426	-0.916559	REXO4	Q9GZR2;A0A0C4DG31
29.3118	28.9011	28.8199	28.8836	29.4248	29.3818	29.7537	29.3295	0.0155457	0.0307214	0.493335	HLA-A	A0A140T8W8;A0A1W2PR61;A0A1W2PPF8;A0A140T8Y4;A0A0G2JPD3;P30450
27.5661	28.2966	28.1304	28.0114	26.9795	27.5961	27.3191	26.6382	0.0156303	0.0307356	-0.867922	BAX	Q07812;K4JQN1
26.5012	26.7079	26.5424	26.2844	26.8277	26.7664	27.0149	26.8066	0.0155455	0.0307585	0.344912	MRTO4	Q9UKD2
25.947	25.0874	24.9476	24.6859	25.9632	26.0713	26.1205	26.2331	0.0156622	0.0307611	0.930075	TBL1XR1	A0A0D9SF63;Q9BZK7;A0A1B0GVH3
22.8967	23.0418	22.6894	23.1701	22.1334	21.2099	20.0021	21.9049	0.0155874	0.0307726	-1.63691	HLA-B	P30462
23.0077	23.6455	23.7158	23.5958	22.1028	22.4756	22.7595	23.0854	0.0155865	0.0308096	-0.88539	CHTOP	A0A087X1B7;X6R700;Q9Y3Y2;Q5T7Y7
23.3754	23.9114	23.6889	24.5825	24.6947	24.5598	25.0203	25.196	0.015982	0.0309561	0.978143	NELFB	A0A0X1KG71;Q8WX92
29.1057	29.1142	28.9465	29.0828	28.6155	28.7139	28.5288	27.9011	0.016054	0.0309775	-0.622478	CANX	P27824;H0Y9Q7
27.5181	27.8235	27.7199	27.8316	27.3932	27.5026	27.2749	27.5086	0.0160329	0.030981	-0.303468	ESYT1	Q9BSJ8
31.2884	31.8451	31.5339	31.5148	31.8747	31.9083	31.9504	32.0453	0.0159762	0.0309929	0.399138	HNRNPM	P52272;A0A087X0X3
29.5302	28.9957	28.853	29.0811	28.5544	28.7033	28.6504	28.3302	0.0162075	0.0310106	-0.555432		A0A1W2PNV4
26.8536	26.5631	26.3656	26.5531	25.79	26.2835	26.2241	26.0561	0.0161395	0.031013	-0.495445	PRKACA	P17612
30.7927	30.9872	30.9848	30.8902	31.1292	31.0762	31.078	31.2969	0.0159695	0.0310297	0.23136	XRCC5	P13010
24.6192	24.9285	24.7351	25.57	25.9684	25.6056	25.5756	25.7536	0.0161687	0.0310472	0.762661	MDN1	Q9NU22
29.0378	29.1715	28.8855	28.64	29.2763	29.2835	29.4341	29.3273	0.0161203	0.0310496	0.396572	RBBP7	Q16576;E9PC52;Q5JP01
26.0803	25.9831	26.0192	25.6856	26.2895	26.2889	26.2399	26.1727	0.0159683	0.0310667	0.305667	CD37	M0QZP6;B7ZAN3;P11049
25.8121	25.3313	24.6023	25.3584	26.2465	26.2432	25.8648	26.4648	0.0159462	0.0311037	0.928803	NDUFA11	Q86Y39;K7EQ77;K7EK78;K7EP35;K7EMT4
27.3217	27.9308	27.7389	27.6048	27.2947	27.1967	27.1623	27.2145	0.0164715	0.0311121	-0.432006	LPXN	O60711;B7Z5P7
26.5908	26.153	26.8007	26.2519	26.0533	25.8869	25.7018	25.9313	0.0157911	0.0311138	-0.555743	MTHFD2	P13995;B8ZZU9
28.7204	27.976	28.4276	28.3285	28.9481	28.825	28.8251	28.9539	0.0158738	0.0311159	0.524888	HDAC1	Q13547;Q5TEE2
27.8255	27.0713	27.6593	27.1442	26.5516	26.8584	26.9055	26.3544	0.0159457	0.0311408	-0.757601	SLC25A6	P12236
24.1858	24.7246	24.8879	24.9115	23.2699	23.1386	21.4922	23.8147	0.0162338	0.0311435	-1.74861	GSTM2	P28161;E9PHN7;E9PLF1;E9PHN6;F6XZQ7
25.322	24.6669	24.5522	25.2275	23.6049	21.6979	23.6942	23.7347	0.0163338	0.0311465	-1.75918	TNFAIP2	Q03169;H0YLC0
26.2381	25.9224	25.7819	25.6357	25.2727	24.8489	25.3729	25.5257	0.0164264	0.0311485	-0.639499	ATP6V1E1	P36543;C9J8H1
23.8594	23.901	25.0495	24.1434	25.5545	25.1942	25.0243	25.1737	0.0157418	0.0311511	0.998344	NCAPH	E9PHA2;Q15003;C9J470
26.4524	26.0128	26.3135	26.3639	26.5576	26.6588	26.6822	26.9649	0.0158576	0.0311531	0.430224	RAB3GAP1	Q15042
25.2229	24.3293	24.2405	24.3808	25.3119	25.1578	25.3819	25.4533	0.0163194	0.0311831	0.782862	PUS7	Q96PZ0;E7EUH7
30.7252	30.863	30.6636	30.5402	30.37	30.4316	30.4097	30.553	0.016389	0.031185	-0.256903	ACADM	Q5T4U5;P11310;B7Z9I1
29.6175	30.0168	29.8874	29.825	30.1732	30.0592	30.139	30.1214	0.0162505	0.0312197	0.286495	DHX9	Q08211
24.3093	24.2865	24.3867	24.2667	24.3588	24.7399	24.6833	24.6341	0.0165191	0.0312439	0.291681	SF3B6	Q9Y3B4
31.3338	30.2098	30.4231	30.0707	28.3093	29.4595	29.5318	29.3946	0.016575	0.0313893	-1.33558	RPL15	P61313;E7EQV9;E7ENU7;E7EX53
23.7617	23.5978	23.5716	22.9278	23.1074	21.6278	22.0632	21.2479	0.0165938	0.0313993	-1.45313	KDELC2	Q7Z4H8
25.5727	26.0181	25.7678	25.9343	25.2279	25.6054	25.3748	25.4326	0.0166362	0.031586	-0.413039	NOP2	P46087
24.3858	24.7714	24.6335	24.5522	24.8958	24.9503	24.819	25.2069	0.0167568	0.0315958	0.382266	POLR1C	O15160;E7EQB9;D6RDJ3;H0Y723
25.1264	24.237	24.5222	24.0867	23.3701	23.7219	23.4763	23.9465	0.0167901	0.0316984	-0.864316	C20orf27	Q9GZN8;H7BYU9
28.5987	28.2641	28.4056	28.2163	27.8931	28.0656	28.1044	28.1139	0.0170906	0.0318474	-0.326931	TAF15	Q92804;A0A075B7D9
23.9743	21.2508	24.2004	24.0073	20.8237	20.6944	20.5134	21.6443	0.0171594	0.0318753	-2.43924	GSTM4	A0A0A0MR85;Q03013
27.288	27.4857	27.3953	27.4393	27.1171	27.1612	27.1627	27.333	0.0169664	0.0318843	-0.208542	PLIN3	O60664;K7ERZ3
26.4126	26.3324	26.4132	26.4224	26.2232	26.3266	26.1604	26.0411	0.0169179	0.0319212	-0.207312	HSD17B12	Q53GQ0;A0A1B0GV93
21.9878	22.6645	23.4737	23.5352	21.3887	21.7818	21.8146	21.7171	0.0172179	0.0319862	-1.23974	KRI1	Q8N9T8
24.0679	23.6354	23.3534	24.112	24.8237	24.3973	24.6365	24.2289	0.0172585	0.0320599	0.729437	SHMT1	P34896
23.9948	24.3931	24.1821	24.352	24.89	24.645	24.4415	24.6298	0.0173114	0.0320782	0.421093	POGZ	Q7Z3K3
25.441	24.8446	24.7922	24.8666	25.4487	25.4098	25.5534	25.7387	0.0172797	0.0321151	0.551546	CPSF1	Q10570
25.3776	26.0886	25.763	26.0072	25.0667	25.2404	25.1238	25.4538	0.0175419	0.032307	-0.587931	MICAL1	Q8TDZ2
27.6761	27.4866	27.4445	27.4474	27.1962	27.3276	27.2646	26.9334	0.017523	0.032344	-0.333207	TMED10	P49755;G3V2K7
29.4288	29.9776	29.9521	29.9341	29.4239	29.372	29.0956	28.7386	0.0175575	0.0323616	-0.665639	RPS27L	Q71UM5;C9JLI6;H0YMV8
22.8634	23.3886	23.3351	23.5014	23.8467	23.5538	24.1847	24.0943	0.017499	0.0323812	0.647724	RBM19	Q9Y4C8
20.9046	21.621	21.2096	21.3517	22.1265	21.5994	21.7992	22.0321	0.0176712	0.032608	0.617606	CDKN2AIP	Q9NXV6
25.1754	24.908	24.5676	24.0246	23.5298	24.0332	23.9213	23.6323	0.0177907	0.0328493	-0.889729	TP53BP1	A6NNK5;Q12888
23.3931	23.3982	22.8525	23.294	23.6209	23.7272	23.6544	24.063	0.017824	0.0328757	0.531904	CCBL1	B7Z4W5;Q16773
25.5771	25.4574	25.3388	25.4536	24.0354	24.9578	24.4293	25.1242	0.0179268	0.0328919	-0.820041	CIRBP	K7EJV1;K7EMY9;K7EPM4;K7EQR7;D6W5Y5;Q14011;K7EJV5;K7ER40;K7ENX8;K7ELV6;K7ELT6
24.9266	24.9292	25.5302	25.137	25.4326	25.7632	25.8298	25.6499	0.0178905	0.0329294	0.53811	ARID1A	O14497;H0Y488;A0A1B0GTU5
28.6861	28.6627	28.5146	28.4903	27.9877	28.4735	28.2429	28.2129	0.0179631	0.0329455	-0.359151	CD44	H0YD13;P16070;H0Y2P0;H0YDW7;H0YCV9;H0Y5E4;E9PKC6
26.9963	26.9836	26.6815	26.695	27.2505	27.03	27.2004	27.4451	0.0182409	0.0329705	0.392439	F13A1	P00488
24.606	24.4164	24.4725	24.3483	24.0831	24.3095	24.1384	23.8124	0.0182932	0.0330057	-0.374947	ARL8A	Q96BM9
23.6699	23.7286	23.7203	23.7241	23.2436	23.0729	23.5478	23.512	0.0181353	0.0330079	-0.366634	NDE1	Q9NXR1;I3L522;I3L2R9
28.8777	29.0809	29.0458	29.1876	28.7546	28.7983	28.8441	28.889	0.0183264	0.0331176	-0.226518	OAS3	Q9Y6K5
24.9768	24.5478	24.1678	24.1114	25.1269	25.1959	25.0206	25.0755	0.0183924	0.0331842	0.653786	AKAP8L	Q9ULX6;V9GZ50
26.085	25.8201	25.9747	26.009	25.7426	25.7311	25.6656	25.8623	0.0184188	0.033219	-0.221806	BCL10	O95999;A0A087WWW9
26.3755	26.3857	26.2867	26.5836	26.7505	26.7007	26.6775	27.1565	0.018498	0.0334431	0.413424	ALDH1B1	P30837
25.3155	25.284	24.9517	25.4237	25.6205	25.4964	25.7662	25.5805	0.0186603	0.0337387	0.372191	SEC11A	H0YKT4;H0YNG3;P67812
29.662	29.4455	29.5811	29.3096	29.2126	29.2566	28.8031	28.7382	0.0187302	0.0337413	-0.496912	TPT1	Q5W0H4;A0A0B4J2C3;P13693;J3KPG2;E9PJF7
27.5162	27.9298	27.3574	27.4328	27.8806	28.0492	27.9534	28.1718	0.0187859	0.0338202	0.454715	CSNK2A1;CSNK2A3	E7EU96;P68400;Q8NEV1
24.1166	23.5914	23.0313	24.3002	24.6993	24.7664	24.4759	24.9447	0.0188509	0.0340067	0.961722	NOL10	Q9BSC4
28.2923	28.5671	28.4652	28.5432	28.1441	28.3272	28.1854	28.2644	0.019012	0.034094	-0.236681	IDH1	O75874
24.3629	24.0562	24.266	23.8388	24.3903	24.6116	24.6631	24.5261	0.0189789	0.0341121	0.416774	CDC40	O60508;Q5SRN1
23.9455	23.5822	23.4113	24.1412	22.2469	22.9686	19.9126	20.3423	0.0190083	0.0341321	-2.40242	RTN4	H7C106;F8W914;Q9NQC3;A0A0U1RQR6
24.8238	25.3544	25.3393	24.9567	25.5325	25.8509	25.5177	25.5596	0.0190328	0.0341408	0.49666	PRKD2	B4DTS2;Q9BZL6
27.368	27.2771	26.9639	27.2645	27.551	27.4048	27.6452	27.5561	0.0191533	0.0341822	0.320896	RAB10	P61026
25.4782	25.8786	25.4591	25.6658	25.2158	24.6561	25.2115	25.2232	0.0190756	0.0342054	-0.543799	ACSF3	Q4G176;F5H5A1;F5H2G6
24.0767	24.4282	24.5406	24.3727	25.0238	24.6092	24.9827	24.6585	0.019152	0.0342202	0.464041	ANKHD1	Q8IWZ3;E9PDP5
27.4785	27.8098	27.72	27.1606	28.0153	27.9655	28.0566	27.9941	0.0190825	0.0342297	0.465625	CDC2;CDK1	A0A024QZP7;P06493;A0A087WZZ9;E5RIU6
22.0345	23.3471	22.5945	22.6886	23.4416	23.6076	23.6771	23.4404	0.019142	0.0342584	0.875521	KLC2	Q9H0B6;A8MZ87
27.0432	26.9784	26.9506	26.6674	27.262	27.1618	27.2455	27.6074	0.019201	0.034273	0.409308	NAA10	P41227;C9JN83;F8W808;A8MWP7;C9JW55
25.7452	25.5841	25.7336	25.7118	25.7884	25.955	25.8125	25.8966	0.0193234	0.0344088	0.169426	MRPL37	Q9BZE1;S4R369;A6NHR2
25.4746	25.3228	25.5934	25.4488	25.2382	25.0924	25.348	25.1848	0.0193145	0.0344469	-0.244076	MRPS7	J3QLS3;Q9Y2R9;J3QQS1;J3KSI8;J3QKW2
26.53	27.3695	26.9747	27.3897	26.3917	26.3623	26.5531	26.0208	0.0192881	0.034485	-0.733977	IRAK4	Q9NWZ3;A0A0R4J2F4;F8VR40
24.1006	24.2958	24.2194	23.7942	24.7369	24.7702	24.3012	24.5543	0.0193582	0.0344989	0.488134	CNOT3	O75175
27.8504	27.7245	27.7441	27.6585	27.4869	27.2939	27.4645	27.659	0.0192856	0.0345233	-0.268324	VCL	P18206
23.7176	22.8161	23.0121	23.3589	22.6855	22.3616	22.5767	22.6167	0.0194652	0.0346755	-0.66606	PTGR1	Q14914;F2Z3J9
27.0112	26.7498	26.8056	26.8713	27.0605	27.0135	27.2411	27.0734	0.0194587	0.0347137	0.237656	PMPCA	Q10713
22.5476	22.607	22.8256	22.91	22.4943	22.1452	21.9224	21.5189	0.019443	0.0347519	-0.702373	YIF1B	K7ERQ0;K7ERY2;Q5BJH7;K7EJQ6
26.944	26.9509	26.8522	27.047	27.3638	27.1587	27.0339	27.3179	0.0195716	0.0348615	0.270034	KIF2A	O00139
25.322	25.1905	25.3772	25.0494	25.4982	25.5112	25.5583	25.3934	0.0196857	0.0350614	0.25552	GALNT2	Q10471
27.6113	27.8148	27.6976	27.81	27.5737	27.5595	27.6024	27.5708	0.0197512	0.0350843	-0.156826	CORO7-PAM16;CORO7	A0A0A6YYL4;P57737
28.357	28.4548	28.3178	28.3043	28.4992	28.4642	28.4847	28.6339	0.0196763	0.0350999	0.162054	NOP56	O00567;Q5JXT2
30.1284	30.1732	29.9153	30.2759	29.948	29.7781	29.8251	29.8807	0.0198421	0.0351572	-0.265237	ARPC2	O15144
25.8911	25.5918	25.8538	25.7693	25.8695	26.2639	26.1533	26.2743	0.0198049	0.035165	0.363769	GEMIN5	Q8TEQ6
22.9628	22.7017	22.9796	22.7174	21.9703	20.5446	21.9922	22.0969	0.019797	0.0352035	-1.18939	IPCEF1	G3V132;Q8WWN9
26.8486	26.7471	26.8006	26.8343	26.4767	26.6638	26.5928	26.7397	0.0200184	0.0353893	-0.189391	TFAM	Q00059;H7BYN3
30.0955	30.2449	30.0859	30.3534	30.3359	30.5674	30.4401	30.6851	0.0200438	0.0354074	0.312183	PFKP	Q01813
26.5256	26.3044	26.2415	25.9526	25.6605	25.8882	25.9388	25.8671	0.0201214	0.0354081	-0.417356	AACS	Q86V21
23.0329	22.5046	22.7111	22.2601	22.0022	22.0698	22.205	21.5888	0.0201885	0.0354348	-0.660733	XPNPEP3	Q9NQH7
22.8793	21.3728	22.051	22.2125	23.3523	23.0552	23.6534	22.8795	0.0202255	0.0355266	1.10622	CKS2	P33552
23.7015	24.6003	24.2084	24.4444	24.7161	24.8948	24.8979	25.0472	0.0202926	0.0356663	0.650341	ASUN	Q9NVM9
20.7371	20.8431	20.6106	20.9176	20.0786	20.0146	20.4649	19.2457	0.0202891	0.035705	-0.826141	HCK	H0Y3C5;J3KPD6;F6SF04;P08631
26.6881	26.7587	26.8121	26.8625	26.5692	26.7142	26.6256	26.5336	0.0204191	0.0357835	-0.169731	UBTF	E9PKP7;P17480
30.0965	30.2322	29.8597	29.6336	29.1056	29.2762	29.2347	29.7646	0.0206284	0.0360389	-0.610217	RPS25	P62851
26.5175	26.816	26.7695	26.5376	27.2662	26.9513	26.8533	27.0328	0.0205657	0.0360778	0.365741	AGL	P35573
23.9444	23.847	23.8671	23.5372	24.2036	23.9516	24.2019	24.2043	0.0207074	0.0360863	0.341413	GTF3C5	Q9Y5Q8;Q5T7U0;Q5T7U1;Q5T7U4;H7BY84
27.2977	27.6481	27.3921	27.4647	27.6726	27.8706	27.6602	27.704	0.0208199	0.0363703	0.276199	NFKB1	P19838
23.9973	24.3544	24.0225	24.1195	25.0983	24.3385	24.5932	24.6724	0.0208822	0.0363726	0.552153	LPCAT1	A0A0G2JQ62;Q8NF37;A0A0G2JRI7
25.8528	26.1322	26.1206	25.9616	26.1925	26.2684	26.3869	26.5958	0.0208263	0.0363742	0.344069	CLUH	O75153;K7EIG1;I3L2B0
24.3588	22.9793	24.0314	23.8399	24.8011	24.8096	24.5	24.9449	0.0208381	0.0364039	0.96157	NUP37	Q8NFH4;F8VTY2
21.9219	22.4055	22.4141	22.9278	20.2544	21.6678	21.4075	21.5454	0.0207993	0.0364095	-1.19853	RBM28	Q9NW13
27.8243	28.4015	28.2637	28.2714	28.5478	28.5243	28.6288	28.7292	0.0208915	0.0364107	0.417315	GTF2I	P78347
25.8945	26.4519	26.0802	26.4282	26.6391	26.5354	26.8482	26.7124	0.0208796	0.0364116	0.470066	RPRD1B	Q9NQG5
24.6475	24.2998	24.3693	24.5723	24.328	23.8898	24.0716	23.7621	0.0208636	0.0364506	-0.459303	NECAP2	Q9NVZ3;D6RB24
25.81	26.3521	25.9367	25.7854	26.2403	26.4973	26.5139	26.441	0.0209606	0.0364957	0.452086	LSM8	F2Z2Y6;O95777;C9JNV3;C9JIZ0
27.0145	26.759	27.2467	27.2315	27.2741	27.5938	27.5801	27.4935	0.0210232	0.0365977	0.422462	IDI1	Q13907;C9JKM8
29.4749	29.922	29.9794	29.7406	29.475	29.3705	29.2246	29.4649	0.0210432	0.0366013	-0.395478	PRDX5	P30044
20.9561	22.5517	21.7675	21.9252	23.1758	22.7959	22.6524	22.8644	0.0212751	0.0367338	1.07198	DMAP1	Q5TG39;Q5TG40;Q9NPF5;Q5TG37;Q5TG36;Q5TG38
25.6849	26.5464	26.2441	26.4667	25.6441	25.538	25.5312	25.7441	0.0212883	0.0367542	-0.621171	MPI	P34949;H3BPB8;H3BMZ9;H3BPP3;H3BUZ9;H3BPM5;H3BQX0;H3BP57;H3BT48;F5GX71;H3BPU7;H3BU66;H3BNY8;H3BT46
23.833	23.9762	23.694	23.9849	25.2231	24.9207	25.2778	23.9554	0.0212567	0.0367728	0.97221	ALKBH5	Q6P6C2
24.2874	25.07	24.9562	25.0174	25.6681	25.5953	25.1557	25.6143	0.0212433	0.0368119	0.675581	PATL1	Q86TB9
21.9863	22.4537	21.7677	21.5339	20.9084	21.1309	21.0505	19.6105	0.0214026	0.0368448	-1.26035	PIGT	F6W983;A0A1W2PP53;A0A1W2PPR6;A0A1W2PNP0;Q969N2;A0A1W2PSC5;A0A1W2PQY1;A0A1W2PQ52;A0A1W2PQN1;A0A1W2PPQ7;A0A1W2PRZ8;A0A1W2PP57;A0A1W2PPC3;A0A1W2PPS0
28.4839	28.2035	27.9949	28.138	28.429	28.5374	28.6099	28.6899	0.0211458	0.0368511	0.361505	ENO2	P09104;F5H0C8
25.533	25.5795	25.8131	25.7408	25.3739	25.2025	25.4186	25.5178	0.0213305	0.0368804	-0.288424	PPCS	Q9HAB8
26.3915	26.8044	26.7201	26.7175	26.4582	26.2988	26.3504	26.1531	0.0213921	0.0368837	-0.343274	LRRC59	Q96AG4
28.9452	28.8225	28.8558	29.0215	28.7787	28.707	28.7606	28.5525	0.0211458	0.0368903	-0.211564	PSMA5	P28066
28.0521	28.078	27.8661	28.0399	28.0886	28.2579	28.303	28.4173	0.0215555	0.0369484	0.25768	ACAA2	P42765;A0A0B4J2A4;K7EME0
28.0545	28.335	28.2712	28.1271	28.0498	27.8978	28.0125	27.8934	0.0215416	0.0369873	-0.233597	PSMC3	R4GNH3;P17980;E9PM69;E9PMD8;E9PKD5;E9PN50
27.0399	26.944	26.9006	26.7303	27.1432	27.3856	27.1545	27.0797	0.0216239	0.0371903	0.287046	CBX5	P45973
23.3182	24.3362	23.7379	23.8895	23.1277	23.3746	22.6164	22.8914	0.0216201	0.0372295	-0.817913	COMMD1	Q8N668;H7C169;E9PE85
25.3697	24.4084	24.5464	24.9769	25.448	25.3966	25.599	25.639	0.0216731	0.0373361	0.69531	HDGFRP2	Q7Z4V5;M0R0J3
28.7554	29.0078	29.0991	29.0169	29.258	29.1332	29.2143	29.3653	0.0217328	0.037511	0.272914	FUBP1	E9PEB5;Q96AE4
23.8104	23.5195	22.6384	23.5169	23.942	24.4129	24.1546	24.3528	0.0220346	0.0377852	0.844268	CHD1L	Q86WJ1;A0A0A0MSH9;A0A087WTM4;A0A0A0MRH8
22.7802	23.3911	23.155	22.635	22.515	22.4212	22.5163	22.1936	0.0220255	0.0378246	-0.578824	COMMD6	B0QZ40;Q7Z4G1
25.6141	24.7693	25.2851	25.1871	25.8069	25.5842	25.8521	25.9476	0.0220152	0.0378642	0.583796	MPP6	Q9NZW5;B8ZZG1;C9J4Q3
23.7974	23.8385	23.7019	23.8406	24.2032	24.6797	24.1189	25.1623	0.0219894	0.0378723	0.746452	RRP8	O43159
23.7854	22.9728	23.5577	23.7233	24.0259	24.0921	24.2415	24.0346	0.0220048	0.0379038	0.588759	GTF2E1	P29083;C9IYL4
26.5906	26.7817	26.9701	26.7547	27.418	27.0137	27.1871	27.0042	0.0219606	0.0379119	0.381474	TARDBP	Q13148;A0A087WX29;B1AKP7;G3V162;A0A087X260;A0A087WYY0;K7EJM5;K7EN94;A0A087WXQ5;A0A087WV68;A0A087WW61;A0A087WX67;A0A087WXV3
28.6455	28.2144	28.5679	28.3645	28.0105	28.2286	28.0703	28.1507	0.0221739	0.0380583	-0.333053	COX5B	P10606
26.6492	26.1988	26.1022	26.1522	26.5686	26.7483	26.6492	26.8359	0.0222353	0.0380604	0.424912	IK	Q13123;E7EQZ7
26.1622	27.0866	26.3298	26.5188	27.2882	27.0329	27.0682	27.3409	0.0223542	0.038158	0.658215	CPNE1	F2Z2V0;B0QZ18;Q99829;A6PVH9;E7ENH5;Q5JX45;Q5JX58;Q5JX59;Q5JX60;Q5JX44
22.2657	23.3807	22.6177	21.416	23.9602	23.7493	23.5321	23.5548	0.0225723	0.0383164	1.2791	TK1	P04183
29.1467	29.3375	29.11	28.8762	28.7729	28.656	28.655	28.9515	0.0225651	0.0383561	-0.358774	RPL38	P63173;J3KT73;J3QL01;J3KSP2
22.7005	23.4149	22.5655	22.9278	22.0497	22.3133	21.8967	20.8716	0.0224346	0.0383801	-1.11936	DERL1	E5RGY0;B4E1G1;Q9BUN8
23.2883	23.4694	23.2852	22.983	22.4463	22.7674	23.0556	22.7991	0.0225457	0.0383959	-0.489348	OVCA2	Q8WZ82
26.9424	26.9573	26.7603	27.2078	27.2456	27.2259	27.467	27.7105	0.0225134	0.0384357	0.445343	ACIN1	S4R3H4;E7EQT4;Q9UKV3
23.082	23.2862	23.5051	23.4324	22.617	22.1217	22.9187	22.9891	0.0226067	0.0384669	-0.664783	MRPL16	Q9NX20;E9PI14
26.5408	26.7167	26.8357	26.5439	27.0563	27.2322	27.0589	26.7628	0.0226596	0.038485	0.368248	EIF1AX	P47813;X6RAC9
28.7485	28.0429	27.8444	27.8155	27.495	27.542	27.3362	26.9277	0.0226902	0.0385031	-0.787591	COX6C	P09669
26.1821	26.3387	25.9864	26.2528	26.5692	26.4068	26.5098	26.3569	0.0229363	0.0385313	0.270697	SLC25A1	P53007;B4DP62
24.9226	25.0502	24.9059	24.8282	25.4065	25.1382	25.1326	25.6622	0.0230091	0.0385533	0.408132	RNMT	O43148;K7EP06
25.3805	25.1649	26.0199	25.5762	24.9445	25.1415	24.8326	24.5473	0.0229183	0.0385708	-0.668846	TMED2	Q15363;F5GX39;E7EQ72
26.438	25.0038	26.1623	25.9968	22.9714	24.459	24.0754	20.428	0.0228988	0.0386105	-2.91678	LSM12	Q3MHD2;K7ELG9
24.1417	23.5129	23.1828	23.2019	22.8143	22.2083	23.0494	22.2564	0.022866	0.0386241	-0.927735	COX8A	U3KQK5;P10176
27.9498	28.2095	27.8205	27.6568	28.2449	28.2632	28.3686	28.2285	0.0228824	0.0386502	0.367176	SNRPD2	P62316;K7ERG4
30.292	30.4313	30.3296	30.4474	30.5917	30.498	30.449	30.588	0.0231484	0.0388536	0.156618	PRKDC	P78527
23.1215	23.5086	22.8557	22.6723	23.7492	23.8869	23.3732	23.7131	0.0231861	0.0388671	0.641086	FIBP	O43427;H0YCE7;E9PSD3
24.8784	25.6639	25.3854	25.338	24.8722	24.8563	24.6261	24.8241	0.0232336	0.0390521	-0.521768	SURF4	Q5T8U5;O15260
22.2459	21.8579	23.0625	22.2028	23.3285	22.8823	23.483	23.1312	0.0234956	0.0391242	0.863947	PRCC	Q92733
24.5229	25.2379	25.0049	24.7658	25.5381	25.5171	25.2	25.3628	0.0234376	0.0391356	0.521616	SMARCE1	Q969G3;J3QKS7;B4DGM3;J3KT85;J3QR61
23.2323	24.1211	24.1655	23.8751	23.0979	23.0184	23.4339	22.8498	0.023327	0.0391469	-0.748492	UVRAG	Q9P2Y5;E9PR71
23.2252	24.7374	24.1692	24.1199	22.7987	22.7728	23.5187	22.8202	0.0237764	0.0393306	-1.08533	SPR	P35270
25.7592	26.0481	26.0317	25.7884	26.209	26.0348	26.2419	26.2526	0.023767	0.0393706	0.277701	SLC25A22	Q9H936;E9PJH7;A0A0D9SFE1;A0A0D9SEI9
24.0044	23.8949	23.1348	24.0095	24.9388	24.155	24.469	24.7325	0.0237265	0.0394106	0.812942	FAM208A	Q9UK61;A0A087X0F1
26.7383	27.0816	27.0104	26.7561	27.1403	27.1553	27.1756	27.1739	0.0237253	0.0394507	0.264677	DDX23	Q9BUQ8
24.6079	24.1931	24.3759	24.4961	24.7142	24.6679	24.6675	24.6971	0.0240456	0.0396636	0.268395	MRPS26	Q9BYN8
22.6851	21.6835	23.222	24.0993	21.2732	21.8311	20.3372	21.149	0.0240715	0.0397206	-1.7748	MBD1	A0A0A0MS90;Q9UIS9;K7EPZ6
25.7168	26.1342	26.1432	26.2974	26.723	26.2717	26.5595	26.6331	0.0241373	0.0397897	0.473916	NUDCD1	Q96RS6
22.0746	20.1503	22.0469	22.6674	23.5578	23.5792	23.342	23.1329	0.0241913	0.0398424	1.66818	BLOC1S4	Q9NUP1
25.3778	26.0154	25.9367	26.1387	26.3648	26.7762	26.4298	26.2862	0.024476	0.0401447	0.597087	PRPF4	O43172
28.3109	28.0716	28.0299	28.0331	28.526	28.3195	28.4489	28.2474	0.024534	0.0401565	0.274121	AKR1B1	P15121;E9PCX2
24.7439	24.9604	24.8984	24.7545	25.2392	24.9301	25.308	25.5623	0.0243078	0.0401615	0.420631	NBAS	A2RRP1;H0Y5G7
24.7626	25.3451	25.172	25.099	25.8224	25.2789	25.5856	25.7154	0.0245222	0.0401687	0.505945	ADD1	P35611;E7EV99;E7ENY0;A0A0A0MSR2;H0Y9H2
24.6449	24.5993	24.5728	24.4105	24.7282	25.1312	25.8897	25.5798	0.0244169	0.0401851	0.775339	VPS28	Q9UK41;E9PM90
28.0703	28.4537	28.4214	28.0928	27.8232	27.5959	27.9118	28.0416	0.0243859	0.0402256	-0.416433	LGALS9	O00182;J3KS82
26.4901	26.3816	26.7115	26.6682	26.0296	25.775	26.1849	26.4131	0.0243813	0.0402661	-0.462238	DAK;TKFC	Q3LXA3;H0YCY6
23.4324	23.4887	23.6219	24.0579	23.0955	22.7682	23.0993	23.3835	0.0247573	0.0404048	-0.563594	RAP1A	P62834
22.833	23.0367	23.4644	23.4117	23.3832	24.0794	23.8862	23.964	0.0247793	0.0404925	0.641758	RFX5	F8W689;P48382;H0Y4B4
27.759	27.6138	27.8803	27.3248	27.2159	27.3641	27.2743	27.2526	0.0248962	0.04066	-0.367771	GLRX	P35754
30.8986	31.1854	31.2397	31.1227	30.8321	30.7877	30.8766	30.9603	0.0251375	0.0411748	-0.247435	HSPA9	P38646
28.9358	28.5175	28.9514	28.8598	28.271	28.4765	28.4897	28.5886	0.0252466	0.0413333	-0.359682	FNBP1	B7ZL14;Q96RU3;H0Y7W6
22.7011	23.0092	22.626	22.9376	22.4724	22.412	22.3761	22.6736	0.0254687	0.0416152	-0.334961	BCL2L13	Q9BXK5;A0A087WX97;A0A087WTL4
27.9067	28.1941	28.0739	27.9763	28.2998	28.41	28.3779	28.1219	0.0256241	0.0419482	0.264614	SRRT	Q9BXP5;H7C3A1
26.1025	26.3902	26.3249	27.1545	26.8578	27.3828	27.4988	27.8242	0.0256533	0.041994	0.897885	CTCF	P49711
27.1115	27.4287	27.4332	27.4317	26.8926	26.7975	26.9352	27.2622	0.0257465	0.0420497	-0.379378	AP3B1	O00203
29.7688	29.9948	30.001	29.942	30.1913	30.0349	30.1582	30.3809	0.0257415	0.0420915	0.264669	KPNB1	Q14974;J3KTM9
26.4916	26.7648	26.6199	26.4352	26.9744	26.8202	26.7525	26.7972	0.0258618	0.0421545	0.258201	CNOT1	A5YKK6
24.0162	23.7893	23.5726	23.0488	25.5983	24.6614	24.0523	24.6058	0.0258582	0.0421962	1.12272	DTX3L	Q8TDB6
28.6123	28.2451	28.3131	28.4205	28.1157	28.1577	28.1391	28.2081	0.0259042	0.0422275	-0.242627	PRKCD	Q05655
25.3862	25.7998	25.8615	25.8958	25.0335	25.2406	25.4438	25.4299	0.0258334	0.0422381	-0.448899	TOR1AIP1	A0A0A0MSK5;Q5JTV8;J3KN66;H0Y4R4
27.2024	27.6358	27.48	27.5015	27.6482	27.6974	27.8739	27.9047	0.0260025	0.0423574	0.326131	COPS2	P61201;B4DIH5;H0YKU5
23.1561	24.0126	23.4202	23.9774	22.6543	23.24	22.8129	22.9746	0.025987	0.0423992	-0.721095	ITGB1	P05556
28.9359	28.4988	28.8238	28.6267	29.2763	29.1079	28.9627	28.9733	0.0261714	0.0425655	0.358761	TUBA4A	P68366
30.1189	30.6343	30.4947	30.5741	31.0414	30.9143	30.8277	30.6727	0.0261679	0.0426075	0.408549	HNRNPD	Q14103;H0Y8G5;H0YA96;D6RAF8
23.0594	23.068	22.9875	23.4214	23.4884	23.3705	23.9283	23.5634	0.0262908	0.0429055	0.453595	LIN7C	Q9NUP9;G3V1D4
24.6638	24.9605	24.979	25.0754	25.2436	25.1354	25.236	25.1538	0.0264384	0.0431002	0.272553	FAM91A1	E7ER68;Q658Y4
26.5948	27.5138	27.2554	27.344	27.8335	27.6767	27.7884	27.8006	0.0263727	0.0431426	0.597804	PRPSAP2	O60256;E7EPA1;C9JJS3;C9K0K7;I3L0S1
25.4973	24.3747	24.941	24.86	25.8096	25.4078	25.6108	25.7117	0.0266497	0.0434112	0.716709	SQSTM1	Q13501;E7EMC7;E9PFW8;C9JRJ8;E3W990
25.8194	26.0322	26.0491	26.0437	26.3007	26.1042	26.1376	26.2416	0.0266688	0.0434235	0.209935	IKZF3	Q9UKT9
26.6524	26.7465	26.6948	26.8129	26.5948	26.6575	26.494	26.4134	0.0268526	0.043499	-0.186751	ACSL4	O60488
32.9891	33.3602	33.1008	32.9926	33.5549	33.2923	33.3503	33.4756	0.0267662	0.0435024	0.307574	TUBB	Q5JP53;P07437;Q5ST81
26.452	26.8257	26.6937	26.3328	26.8941	27.1509	26.8418	27.3959	0.0269359	0.0435582	0.49466	CDK6	Q00534
20.1049	19.9305	20.1467	19.5989	20.9778	20.6508	20.1349	20.5104	0.0271229	0.0439297	0.623205	GIT1	J3QRU8;A0A0C4DGN6;Q9Y2X7
24.4933	24.7363	24.3892	24.5505	24.3746	24.2516	24.3416	24.1065	0.0272392	0.0442498	-0.273698	SRA1	Q9HD15
19.7143	20.8508	20.6957	19.5397	21.6014	21.5905	20.8566	21.1601	0.0273283	0.0443155	1.10201	PCBP2	F8VZX2;H3BRU6;F8W0G4;F8VXH9;F8W1G6
28.0563	27.6225	27.4367	27.5682	28.0414	28.045	28.1183	28.051	0.0273109	0.0443587	0.393014	NDUFV1	G3V0I5;P49821;B4DE93
23.9853	24.9461	24.3809	24.572	25.3102	24.7967	25.1832	25.5645	0.0273597	0.044393	0.742572	RING1	Q06587
26.1724	26.068	26.0295	25.9029	25.6511	25.7468	25.1068	24.6536	0.027614	0.0451107	-0.753602	ATP2A2	H7C5W9;P16615
20.4852	21.3826	20.9666	21.2941	22.8799	21.8229	21.4384	22.2722	0.0276504	0.0451406	1.07118	PAXIP1	Q6ZW49
27.2559	27.333	27.4535	27.2382	26.9575	27.0819	26.8681	27.2533	0.0276102	0.0451545	-0.279934	ATP5I	P56385
21.3208	22.3949	22.0434	22.287	22.5481	22.9237	23.0253	22.6353	0.0277638	0.0453708	0.771579	STAG1;DKFZp781D1416	Q8WVM7;Q68DW7
31.2171	31.0069	30.8893	30.7832	30.6444	30.672	30.7892	30.6452	0.0277427	0.0454147	-0.286397	ACTR2	P61160;F5H6T1
25.6992	24.3742	25.3387	24.9603	23.946	24.3086	24.0638	24.4916	0.0277978	0.0454932	-0.890612	TNFAIP8	O95379;D6RCM8
28.2217	27.9216	28.2361	27.8564	27.193	27.2883	27.5975	27.9263	0.0278239	0.0455652	-0.557698	RAB6A;RAB6B	P20340;Q9NRW1;J3KR73
27.6074	27.8371	27.6308	27.7288	27.3136	27.2521	27.5146	27.5999	0.0278642	0.045583	-0.280956	NIT2	Q9NQR4;H7C579
23.9038	24.0042	24.508	24.0558	23.8392	23.1389	23.2578	23.7259	0.02805	0.0458631	-0.627495	UBL4A	P11441;Q5HY81
23.7504	23.2915	23.9653	23.3769	23.0119	23.3152	23.044	22.7316	0.0281866	0.0461965	-0.570383	GLB1	P16278;E7EQ29
28.0874	27.689	27.9739	28.0577	27.7208	27.6188	27.7275	27.6519	0.0282571	0.0463946	-0.272216	STK10	O94804
25.7706	25.4823	25.3271	25.4394	26.5931	26.2869	25.6424	26.0436	0.0284552	0.0466077	0.636628	LBR	Q14739;C9JXK0
26.5548	26.6385	26.6856	26.7321	26.7255	26.8415	27.0975	27.0804	0.0285743	0.0467958	0.283431	PYCR1	P32322;E2QRB3;J3KQ22;J3QKT4;J3QL24
25.6362	25.4569	25.5708	25.5195	25.4368	25.2969	25.1083	24.8717	0.0285619	0.0468407	-0.367447	ACOT13	Q9NPJ3
26.8641	27.0972	26.8946	27.04	27.2959	27.0631	27.1959	27.4177	0.0285475	0.0468473	0.269201	KCNAB2	Q13303;Q5TG81;Q5TG80
29.4645	29.3058	29.4149	29.326	29.2197	29.2524	29.2104	29.3179	0.0286333	0.0468659	-0.127741	RARS	P54136
26.6938	26.8833	26.7294	26.5748	26.5983	26.4408	26.3137	26.5219	0.0288363	0.0470928	-0.251637	NDUFA4	O00483
25.8636	25.6574	25.7274	25.9395	25.853	26.2616	26.2894	26.1365	0.0290309	0.0472894	0.338158	UBE2O	Q9C0C9;K7ES11
28.1077	28.4111	28.4402	28.5742	27.9357	28.0671	27.9304	28.2247	0.0290142	0.0473346	-0.343824	UGP2	Q16851;A0A087WYS1;E7EUC7;C9JNZ1
24.11	24.0768	23.4875	24.5135	22.5715	22.8708	22.2748	19.6305	0.029092	0.047458	-2.21002	GALNT7	Q86SF2;H0YAH3
25.1822	25.2838	25.4787	25.0651	23.9932	25.0827	24.7171	24.3938	0.0293555	0.0476274	-0.705791	POFUT1	Q9H488
29.2583	28.9562	28.975	28.7177	28.498	28.4039	28.5412	28.8285	0.0292378	0.0476416	-0.408858	ARPC5	O15511;B1ALC0
28.2315	28.0185	28.2061	27.9618	28.3422	28.212	28.4995	28.3864	0.0292521	0.0476571	0.25552	GSPT1	H3BR35;P15170
26.7486	26.7991	27.0159	27.113	27.1887	27.0959	27.3139	27.1898	0.0293306	0.0476727	0.277945	KYNU	Q16719
24.4727	24.6205	25.4145	24.7605	23.7521	24.2213	24.1741	24.344	0.0295015	0.0477419	-0.69417	ARHGAP10	A1A4S6
29.8868	30.1728	30.1945	29.912	29.498	29.4103	29.6011	29.971	0.0294805	0.0477873	-0.421422	ARPC4-TTLL3;ARPC4	F8WCF6;P59998;F8WDD7;H7C0A3;A0A0A6YYG9;R4GN08
27.0381	27.096	27.3085	27.339	26.7869	26.9404	27.0053	27.0106	0.0297901	0.0478754	-0.259579	AP1M1	Q9BXS5;E7ENJ6;K7EJL1
22.8587	23.4618	23.1366	23.7043	22.3216	22.8581	22.8483	22.5854	0.0297189	0.0478903	-0.636981	SURF6	O75683
24.4505	25.1776	24.7685	25.1843	25.3177	25.436	25.423	25.4458	0.0295864	0.0478938	0.510403	CHP1	Q99653;H0YKE7;F5GX29;H0YNG9
27.1552	27.5103	27.4024	27.5176	26.4093	27.3116	26.8257	26.3801	0.0296602	0.0479091	-0.664708	RPS26;RPS26P11	P62854;Q5JNZ5
27.3312	27.458	27.8284	27.623	27.8481	27.8386	27.8655	28.1017	0.0297603	0.0479206	0.353315	RPA1	P27694;I3L4R8
26.0711	26.5815	26.5909	26.5063	26.8129	26.6638	26.8917	27.0404	0.0298527	0.0479396	0.414762	ASNA1	A0A087WXS7;O43681
23.0501	23.2505	22.9689	23.3593	23.5132	23.8325	23.2873	23.6424	0.0299312	0.0480075	0.411648	CARD11	Q9BXL7
26.9122	25.8025	25.9784	25.7918	24.3807	24.7123	24.9841	25.8115	0.0299514	0.0480113	-1.14906	PPM1A	P35813;E9PKB5
23.7769	23.6064	23.7534	23.7387	23.7045	23.4228	23.355	23.386	0.0300204	0.0480865	-0.251754	AP1S1	H7C1E4;P61966
27.341	26.2645	27.0571	27.7167	26.2835	25.5316	26.4559	25.9412	0.0303598	0.0483031	-1.04182	S100A6	R4GN98;P06703
30.4378	30.9098	30.6984	30.55	30.3507	30.3346	30.3005	30.4229	0.0303105	0.0483109	-0.296812	RPLP0	P05388;F8VU65;F8VWS0;F8VW21;F8VPE8;G3V210;F8VQY6;F8VRK7;F8VZS0;F8VS58;F8VWV4
23.7192	22.0136	22.8225	22.852	23.8165	23.6596	24.008	23.9506	0.0302927	0.0483561	1.00684	METTL1	Q9UBP6;H0YIH0
22.5329	23.1828	22.999	21.8856	21.3565	21.3219	21.7936	22.1629	0.0302755	0.0484015	-0.99133	TRUB1	Q8WWH5
24.7626	24.8902	25.2445	25.7227	24.2492	24.5866	24.6771	24.464	0.0302203	0.0484436	-0.660761	CDK5	Q00535
21.4384	21.57	22.5146	22.5292	20.9165	21.2204	20.4962	21.4047	0.0302597	0.0484469	-1.00361	RAB13	P51153
22.177	23.3938	24.2495	24.4116	21.7861	22.8422	21.1809	21.0543	0.0305551	0.0485196	-1.84206	GTF2E2	P29084
23.1111	22.73	23.2069	23.2051	22.3105	22.8777	22.6341	22.6096	0.0309388	0.0493333	-0.455295	DYRK1A	Q13627
25.4814	26.2903	25.8497	25.7251	25.1636	25.2595	25.2221	25.5589	0.0310162	0.0494291	-0.535591	ECHDC1	Q9NTX5;H0Y5L2;H0YCS9
24.8964	25.3938	24.9569	25.1435	25.3498	25.3967	25.6984	25.9425	0.0311013	0.0495284	0.499203	MIOS	Q9NXC5
21.8549	22.6064	22.3188	22.5249	22.9195	23.0714	22.6207	22.8513	0.0311806	0.0495777	0.539465	RNASEH2C	H0YEF3;E9PN81;Q8TDP1
25.7929	26.1513	26.0116	26.0702	26.1417	26.224	26.3227	26.3432	0.0311734	0.0496238	0.251436	HEATR1	Q5T3Q7;Q9H583
28.3324	28.2133	28.4054	28.266	28.0586	28.0406	28.0127	28.2786	0.031282	0.0497807	-0.206643	USO1	O60763
28.8649	28.8128	28.9087	28.7613	28.6556	28.7292	28.5894	28.7824	0.0314565	0.0499129	-0.147776	EIF2S3;EIF2S3L	P41091;Q2VIR3;F8W810
23.8964	24.4522	24.1537	24.4427	24.742	24.5385	25.0236	24.5734	0.0313864	0.0499332	0.483115	DHX16	A0A140T947;O60231;A0A140T9T4;Q5SQH5
26.7566	27.1643	26.7121	26.9437	26.4954	26.6533	26.3217	26.6533	0.0313269	0.0499424	-0.363237	TAP1	A0A140T9T7;Q03518
23.0431	22.7068	22.6962	22.386	22.2774	22.328	22.2741	21.6845	0.0315901	0.0502593	-0.56703	LSM14B	Q9BX40
26.8647	26.4271	26.289	26.5644	26.8185	26.9012	27.3292	26.9546	0.0319491	0.0508418	0.464571	PTPN11	Q06124;A0A1W2PPU4
23.164	22.7048	22.651	22.8069	22.1301	21.6543	22.0466	22.7249	0.0321314	0.051342	-0.692686	SLC12A6	Q9UHW9;H0YMQ9;H0YKQ8;B3KXX3
24.5736	25.0246	25.106	24.5763	23.6331	24.3135	24.57	24.0298	0.0321892	0.0513536	-0.683504	CUL4B	K4DI93;Q13620
26.0747	25.7074	25.5281	26.0051	26.0162	26.2404	26.4405	26.3804	0.0323655	0.0516276	0.440542	SLC2A1	P11166
30.3256	30.5147	30.2837	30.4313	30.6261	30.5481	30.4861	30.7481	0.0323078	0.0516753	0.213262	PHB2	Q99623;J3KPX7;F5GY37;F5GWA7;F5H3X6
25.1278	25.5056	25.2845	25.4556	25.0419	25.213	25.0277	24.8941	0.0324934	0.0518306	-0.299192	LARP7	Q4G0J3;D6RFF0
28.8768	28.8191	28.7956	28.4574	28.529	28.3923	28.4187	28.5011	0.0327612	0.051989	-0.276947	DECR1	Q16698;E5RJG7;E5RFV2
21.99	21.7912	21.2658	21.9522	22.0818	22.2692	22.7014	22.289	0.0327805	0.0519927	0.585553	STX16;STX16-NPEPL1	Q96NX8;H3BU86;O14662;F8W9Z6;B7ZBM8
25.7404	26.1013	25.9022	25.9321	26.2575	26.1067	26.1657	26.0752	0.0327841	0.0519963	0.23226	TUBG1;TUBG2	P23258;Q9NRH3
26.8113	26.9612	27.3339	27.2244	27.6337	27.3796	27.3629	27.4447	0.0326385	0.0520258	0.372533	PNN	Q9H307
22.4036	22.4474	23.0579	23.0295	21.3776	22.1769	22.3772	21.1377	0.0327572	0.0520368	-0.96725	MRPL14	Q6P1L8
29.1578	29.5717	29.3882	29.7295	30.0129	29.6283	29.9164	29.9303	0.0330996	0.0522708	0.410215	HNRNPA0	Q13151
25.0586	25.076	24.8018	24.8492	24.7282	24.4748	24.7572	24.7481	0.0330769	0.0523187	-0.269372	RAP2C	Q9Y3L5;A0A087X2C3
21.3534	21.1374	21.8603	21.3946	21.4502	22.7833	22.7184	22.7152	0.0333519	0.0525631	0.980347	POLR3A	O14802
25.1857	24.5602	24.7849	25.1956	24.634	24.0552	24.4712	24.3884	0.0334991	0.0528037	-0.544427	NEK7	Q8TDX7
23.5104	23.6522	23.6442	23.2942	23.7342	23.8739	23.6932	23.8215	0.0335767	0.0528139	0.255466	CECR1	A0A087X0I3;B4E3Q4;Q9NZK5
27.9812	27.7361	27.7823	27.521	28.2128	27.8743	28.1502	28.0962	0.0337192	0.0531595	0.328198	ASNS	P08243;F8WEJ5
26.2954	26.205	26.1069	25.8022	26.4019	26.3133	26.4471	26.4988	0.0337319	0.0531694	0.312905	EPS15L1	Q9UBC2;M0R165;M0R2S2
23.7298	24.2882	24.1697	24.1891	24.3353	24.8053	24.6042	24.4133	0.0338483	0.0534231	0.44533	IKZF2;ZNFN1A2	A0A0A0MSL2;A0A0A0MT14;B4DWF2;Q9UKS7
25.3962	25.7147	25.196	25.3939	24.035	24.5716	23.8053	21.3357	0.0338845	0.0535345	-1.98828	STT3B	Q8TCJ2
29.7373	29.3253	29.3745	29.4399	29.6663	29.7594	29.7168	29.7822	0.0340478	0.0537402	0.261923	IMPDH2	H0Y4R1;P12268
29.3163	24.5165	25.1603	25.7477	22.2579	23.3042	23.4655	23.5462	0.0342226	0.0541307	-3.04173	RPL37	P61927
23.8022	23.097	22.9728	23.2435	24.3097	23.4301	24.0952	24.2638	0.034414	0.0543101	0.745788	PURA	Q00577
27.9558	27.9637	27.9489	27.5611	28.1223	28.0342	28.2236	28.329	0.0345996	0.0545109	0.319876	CARM1	Q86X55;K7EQA8
23.4373	23.7374	22.5797	23.2118	24.5379	24.2979	23.4955	24.253	0.0349916	0.055048	0.904502	RPRD1A	A0A0C4DGQ6;Q96P16
27.4573	26.9753	27.3891	27.227	27.4016	27.6709	27.7228	27.974	0.035241	0.0555009	0.430161	SARNP	P82979;F8VZQ9;H0YHG0
26.9899	27.103	27.1926	27.2352	27.5334	27.743	27.2574	27.3187	0.0353405	0.0556495	0.332967	RNASET2	D6RHI9;A0A087WZM2;O00584;D6REQ6;H0YAE9
33.3221	33.1876	33.2473	33.1253	33.0589	33.1168	33.0341	33.1429	0.035431	0.0559567	-0.132396	HSPA8	P11142;E9PKE3;E9PNE6;E9PN89
27.1592	27.342	27.305	27.0521	27.4758	27.312	27.4921	27.6972	0.035507	0.0560577	0.279718	SNX5	Q9Y5X3;Q5QPE5;Q5QPE4
24.0686	24.9227	24.4908	24.0893	23.5068	23.2367	23.6409	24.1617	0.035469	0.0561082	-0.75634	TFCP2	Q12800;F8VWL0;F8VX55
20.0449	20.8611	21.5782	20.3391	21.2057	22.2661	22.3408	21.6559	0.035636	0.056324	1.16133	BMP2K	Q9NSY1;H0Y9P1
28.9369	27.9207	29.0243	27.1331	25.8837	26.4414	26.391	27.7772	0.0358238	0.0566835	-1.63041	TMSB10	P63313
26.5172	26.1778	25.7248	26.1054	26.8071	26.4584	26.6682	26.53	0.035883	0.056693	0.484631	ACO1	P21399
29.3452	29.4228	29.3101	29.3814	29.2162	29.3422	29.1652	29.068	0.0358702	0.0567439	-0.166961	FERMT3	Q86UX7;F5H1C6
26.7632	26.7351	27.3262	27.0679	26.6701	26.545	26.5147	26.6132	0.0360849	0.0567957	-0.387376	ENSA	A6NMQ3;Q5T5H1;O43768;A0A1W2PRU0
29.3148	29.3649	29.2623	29.1965	29.2217	29.1107	29.186	29.1571	0.036057	0.0568466	-0.115725	PSMD2	Q13200
27.8872	27.936	27.795	27.871	28.1166	28.0006	27.956	27.9433	0.0363368	0.0569016	0.131821	C14orf166	Q9Y224;G3V4C6
23.0094	22.4178	22.8366	23.2022	22.1085	21.4097	22.5008	20.583	0.0364085	0.0569071	-1.21599	BIN2	S4R418;A0A0A0MT10;A0A087X188;Q9UBW5;F5H0W4
27.042	26.8952	26.7511	27.0241	26.765	26.6182	26.8066	26.5489	0.036386	0.056933	-0.243425	MVD	P53602;H3BP35
31.0901	30.1532	30.2715	30.2614	29.3943	29.8988	30.0571	29.6018	0.0362762	0.0569526	-0.706038	RPL10;RPL10L	P27635;X1WI28;B8A6G2;A6QRI9;Q96L21
27.1206	27.447	27.2559	27.2416	27.6916	27.2925	27.8316	27.6899	0.0364878	0.0570312	0.360109	PUF60	A0A0J9YVP6;A0A0J9YYL3;A0A0J9YXX5;Q9UHX1;A0A0J9YXJ8;A0A0J9YVR6;E9PQ56;A0A0J9YWM1;H0YEM1;E9PN18;E9PMU7
32.3133	32.1726	32.1387	31.9867	31.9178	31.8703	32.0083	32.0087	0.0368748	0.057553	-0.20149	NME1-NME2;NME2;NME1;NME2P1	Q32Q12;J3KPD9;P22392;E7ERL0;O60361
25.9748	24.3111	24.7909	24.1954	22.8263	24.2912	23.3784	23.3452	0.0368692	0.0576043	-1.35778	RPL7L1	Q6DKI1;R4GMU7
23.1237	24.0724	23.3072	22.9657	23.6763	24.3412	24.195	24.6051	0.0370188	0.0578932	0.837174	AKT1	P31749
30.8026	30.9717	31.002	31.034	31.1536	31.0707	31.0811	31.3078	0.037046	0.0578987	0.200735	HNRNPC	G3V4W0;B4DY08;B2R5W2;G3V4C1;G3V2D6;G3V251
27.1162	27.3077	27.2479	26.963	26.558	26.6486	26.5056	27.1489	0.0371183	0.0580426	-0.443443	BPNT1	O95861;A6NF51
21.5631	21.9805	22.2768	21.8326	22.3393	23.0095	22.3735	22.3171	0.0371551	0.0580479	0.596606	CWF19L2	H7C3G7;Q2TBE0;H0YE03
22.5996	24.3305	23.9318	24.044	24.8191	24.641	24.8779	24.7124	0.0371898	0.058078	1.03614	NCAPG	Q9BPX3
29.1764	29.6949	29.3669	29.2788	29.132	29.0889	28.818	29.068	0.0376775	0.0582077	-0.35253	RPN1	P04843;B7Z4L4
23.4604	22.4923	23.3192	24.161	20.8081	23.3617	20.5417	20.1418	0.0373784	0.058221	-2.14489	NCSTN	H0Y6T7;Q92542
27.7542	27.3505	27.4357	27.5543	27.7561	27.7371	27.862	28.185	0.0373496	0.0582478	0.361344	FARSA	Q9Y285;K7ER00;K7EPH2
23.899	24.4114	24.5127	24.2225	24.5909	24.7285	24.6275	25.2305	0.0376159	0.058259	0.532928	GTF3C4	Q9UKN8
29.8735	29.624	29.7285	29.7149	29.9873	29.7944	29.9283	30.094	0.0373381	0.058264	0.215765	YARS	P54577;A0A0C4DGZ5
23.0808	23.3276	25.5599	24.4273	21.5081	22.3696	20.2915	23.2322	0.0377202	0.0582797	-2.24853	RRS1	Q15050
32.6679	32.4791	32.5284	32.5859	32.201	32.3189	32.4178	32.5054	0.037753	0.0582847	-0.204538	EZR	E7EQR4;P15311
23.0303	22.697	22.877	23.3627	23.4233	23.614	23.3593	23.2647	0.0375601	0.0583104	0.423587	NUMB	P49757;G3V3R1;G3V3M5
28.6264	29.1809	29.0113	28.933	29.288	29.1554	29.2542	29.4006	0.0375182	0.058316	0.33665	CAD	F8VPD4;P27708
24.9904	24.8784	24.6717	24.7286	24.9436	25.2004	25.1516	25.5791	0.0375045	0.0583357	0.401378	ARIH1	Q9Y4X5
24.0838	23.6388	23.5233	24.7225	22.812	23.6713	22.7918	23.0815	0.0379142	0.0584316	-0.902948	COLGALT1	Q8NBJ5
26.3658	26.9627	26.8933	26.821	25.8533	26.5287	26.402	26.1064	0.0378801	0.0584478	-0.538122	NSFL1C	Q9UNZ2;F2Z2K0
23.0223	23.5658	24.7337	23.2303	21.9247	22.9008	22.7893	22.1768	0.0380159	0.0586047	-1.19013	RTN4IP1	G3V1R2;Q8WWV3
25.0089	25.3662	24.9875	25.8153	25.8126	25.9704	25.7976	25.725	0.038133	0.0588581	0.531927	RCC1	C9JW69;P18754;C9JRH2;C9JMJ4;C9J3R0;C9JQZ4
28.9463	28.5633	28.4199	28.5172	28.3663	28.3133	28.2823	28.2306	0.0387179	0.059157	-0.313549	CMPK1	P30085;Q5T0D2
25.3048	24.5923	24.1286	24.9145	25.1187	25.4711	25.5994	25.7119	0.0385438	0.0591638	0.740247	SLC2A3;SLC2A14	P11169;Q8TDB8
22.27	22.1513	22.1776	22.0222	23.0769	22.1738	22.9269	22.6171	0.0385637	0.0591749	0.543433	CHURC1-FNTB;FNTB	B4DL54;P49356
23.642	23.666	23.394	23.825	24.7515	24.3944	23.6179	24.8109	0.038519	0.0591805	0.761916	LIG1	F5GZ28;P18858;M0R0Q7
25.2412	26.5404	26.3117	26.2944	26.9884	26.9487	26.6919	26.9029	0.038701	0.0592083	0.786048	HAT1	O14929
22.0781	23.3485	22.7282	23.8821	24.6362	24.2459	23.8098	23.9084	0.0385982	0.0592209	1.14083	THOC5	Q13769;F8WCP5;H7C072
21.3383	21.9587	20.1416	20.2772	19.8112	19.9489	19.7861	18.829	0.0385138	0.0592321	-1.33514	NCF1	C9J155
26.9143	26.6349	26.664	26.7396	26.6518	26.5255	26.2278	26.3728	0.0386944	0.0592598	-0.293687	NEK9	Q8TD19
30.1608	30.2202	30.3012	30.2278	30.1499	30.1755	30.0625	30.1245	0.0383722	0.0592826	-0.0993915	CCT4	P50991
28.4297	28.3513	28.4514	28.0901	28.6988	28.5511	28.5618	28.4976	0.0385053	0.0592838	0.246695	TBCA	E5RIW3;E5RJD8;O75347;E5RHG6
23.7733	24.478	24.4536	24.3998	24.7772	24.5872	24.8082	24.7869	0.0388602	0.0592976	0.463687	DNMT1	P26358
28.353	28.6115	28.7216	28.6645	28.3472	28.0851	28.3643	28.4024	0.0384636	0.0593357	-0.287901	CYFIP2	E7EVJ5;Q96F07;H7C229;E7EW33
25.6777	24.499	25.1709	25.1408	26.093	25.8173	26.3928	25.4686	0.038857	0.0593489	0.820811	GTF2F1	P35269;M0R0R9;M0QXD6;M0R0Z3
25.6488	25.5998	25.2628	24.5572	26.0114	26.0378	26.0641	25.7297	0.0389194	0.05935	0.693585	RRM2	P31350;C9JXC1
27.4049	28.2142	28.2265	28.0423	28.5065	28.413	28.4411	28.6266	0.0389239	0.0593782	0.524847	NSUN2	Q08J23
23.6865	24.2211	24.4601	24.0073	22.4447	23.4983	23.2798	23.7308	0.0388507	0.0594003	-0.855369	UBE2H	H7C4M9;C9JZY6;P62256;C9JZG9;C9J8Q9
30.0594	30.2012	30.2626	30.0193	30.2193	30.3518	30.3208	30.4829	0.0391422	0.0596486	0.208075	PABPC1	P11940;A0A087WTT1;E7EQV3;E7ERJ7;H0YAR2
24.9627	24.226	23.8115	23.9752	24.7548	24.9642	24.9054	25.1845	0.0391331	0.0597	0.708367	KDM4B	A0A0C4DFL8;F5GX28;O94953;K7EQ54
24.7006	25.2923	25.1468	24.7632	25.2918	25.4337	25.321	25.4199	0.0391296	0.0597515	0.390884	RFC2	P35250;A0A087WVY3
22.1046	22.9323	21.8401	21.0447	21.0417	20.9311	21.0109	20.8146	0.0392064	0.0598485	-1.03083	TCF25	H3BQ53;Q9BQ70;H3BS87;H3BMJ8;Q9H7D3;H3BSP8;H3BTU3;Q9H384
22.5504	22.8579	22.2618	22.3571	22.9641	22.8737	23.1278	23.9201	0.039497	0.060227	0.714617	GPX3;GPX6;GPX5	A0A087X1J7;P22352;A0A087X0K3;P59796;O75715
23.1822	23.664	24.2442	23.6016	22.8396	22.9303	23.1674	23.2507	0.0395641	0.060323	-0.626015	FUNDC2	Q9BWH2;H7C0K8
29.5554	29.6444	29.6261	29.7128	29.6064	29.3651	29.3942	29.5038	0.0397391	0.0608137	-0.167303	HADHB	P55084;F5GZQ3;B5MD38
23.8079	24.6086	24.2147	24.2605	24.7478	24.8268	25.0812	24.4394	0.0398214	0.0608302	0.550861	HSPA14	Q0VDF9
26.6776	26.317	26.3635	26.378	26.64	26.7645	26.6429	27.0923	0.0402217	0.0615514	0.350909	LYPLAL1	Q5VWZ2
26.9403	27.5322	27.0734	26.92	27.4912	27.5824	27.3613	27.677	0.0402076	0.0616041	0.411485	SUMO1	B8ZZN6;P63165;B8ZZ67
27.0107	26.8276	26.924	26.4358	26.4518	26.5819	26.3756	26.3694	0.0403362	0.0618067	-0.354871	MYDGF	Q969H8;M0QXF7;M0QYN0
28.1506	28.2009	28.1574	28.3459	28.3603	28.4427	28.3082	28.3159	0.0404345	0.0619266	0.143074	INPP5D	Q92835;H0Y5Q9
27.2805	27.0425	26.906	26.5016	26.4425	26.3993	26.277	26.6885	0.0404174	0.0619795	-0.480838	SNRPD1	P62314;J3QLI9
24.6249	23.5872	24.9631	25.5409	23.6139	23.5333	23.3221	23.8393	0.0406785	0.062215	-1.10188	RAB1A	P62820;E7END7
28.4255	27.7649	27.9734	28.0537	28.4106	28.6991	28.534	28.2806	0.0407423	0.0623973	0.426693	SWAP70	Q9UH65;E7EMB1
24.4269	23.6906	23.6858	24.0483	23.2771	23.692	23.121	23.5141	0.0412121	0.062966	-0.561853	SYNJ2BP-COX16;SYNJ2BP	A0A087X1F5;A0A087WYV9;A0A087WUM0;P57105
22.5878	23.1283	22.5709	23.5297	20.862	22.0032	22.6355	21.8209	0.041195	0.0630196	-1.12377	C16orf13	A0A087WYU2;Q96S19;H3BS73;H3BNB2;H3BRT2
28.3197	27.0529	27.6781	27.8073	27.1123	26.8546	27.1299	26.9862	0.0413728	0.0630348	-0.693781	RCN1	Q15293
23.1769	24.0003	23.5965	23.1056	22.1381	22.6823	23.0978	22.9157	0.0411827	0.0630733	-0.761346	TACC1	O75410;B4E3H6;H0YBT8;H0YAY0;E7EVI4;E7ET87
27.0009	26.8151	26.7786	26.691	26.7681	26.5513	26.5522	26.4674	0.0415795	0.063219	-0.236634	SEC23A	F5H365;Q15436
24.0634	25.145	25.0721	25.0028	24.3111	23.9058	24.2751	23.9429	0.0416283	0.0632604	-0.712082	TRAPPC4	E9PQE8;Q9Y296;E9PN70;E9PKS9;G3V1A0;G5EA23;J3KP27
24.8023	24.0357	24.2807	23.8839	24.9778	24.7376	25.1421	24.5852	0.0416687	0.0633085	0.610023	RRP15	Q9Y3B9
28.1076	27.6938	28.0582	28.1335	27.7358	27.6925	27.7851	27.697	0.0417815	0.0634208	-0.270661	PPA2	Q9H2U2;D6R967;H0Y9D8
28.2544	28.3869	28.4048	28.4172	28.5353	28.3854	28.5938	28.5662	0.0418339	0.0636041	0.154304	EIF2S1	P05198;G3V4T5;H0YJS4
23.3098	22.5595	23.3207	23.2802	22.2658	21.9775	22.3448	20.1041	0.0419884	0.063703	-1.4445	UBL5	Q9BZL1;K7EQ43
26.1204	26.6095	25.9811	26.5761	27.0517	27.0241	26.524	26.766	0.0419608	0.063723	0.519678	PDS5B	Q9NTI5
30.2891	28.4562	28.3505	28.8091	27.082	28.1255	28.0904	26.8816	0.0419477	0.0637768	-1.43135	HLA-B	P18464;P30498
28.699	28.1647	28.0886	28.2958	28.5727	28.6533	28.691	28.8863	0.0423561	0.0643777	0.388852	HADH	A0A0D9SFP2;Q16836;A0A0A0MSE2;E9PF18;A0A1W2PNM1;A0A1W2PQV5;A0A1W2PQ78;A0A1W2PQC2;A0A1W2PRT2
23.4638	24.2496	24.4214	23.8788	24.5743	24.5506	24.4205	24.7824	0.0424776	0.0643909	0.578576	AAAS	F8VZ44;Q9NRG9;H3BU82
23.5699	23.8035	23.2138	23.5406	23.6671	24.3351	23.9007	24.2343	0.0425247	0.0645152	0.502354	THOC1	A0A087WWS1;Q96FV9;R4GMN4;A0A087WY84
22.7839	22.167	21.0455	21.0524	20.4423	20.6198	19.9955	21.045	0.0426968	0.0646257	-1.23656	ERO1LB	Q86YB8;Q5TAE8
29.8467	29.7675	29.9871	30.0426	29.6285	29.751	29.7376	29.7892	0.0427599	0.0647092	-0.184364	PRDX3	P30048
22.2262	22.4369	22.4148	22.1122	21.9732	21.4328	22.1256	21.9294	0.0431061	0.0652215	-0.432316	C18orf8	K7ENL9;Q96DM3;K7EIS6;A0A087WZD4
25.0928	25.0222	25.3555	25.1976	25.287	25.4086	25.9621	25.8474	0.0430719	0.0652427	0.459274	DEF6	Q9H4E7
23.2991	20.9841	20.902	20.9599	23.2978	23.1425	22.7918	23.0216	0.0431379	0.0652909	1.52715	HMG20A	Q9NP66;H0YKM5
21.1434	20.9687	21.1543	20.4235	21.5369	21.0942	21.568	21.7099	0.0432657	0.0654439	0.554771	POLD4	Q9HCU8;E9PL15;A0A087WWV3
22.9854	24.2813	24.9824	22.348	26.3985	26.2552	26.4019	24.0438	0.043334	0.0655866	2.12558	IREB2	A0A0A6YY96;P48200
27.4305	27.2666	27.5738	27.6366	26.8347	27.298	27.3127	27.0128	0.0436558	0.0658729	-0.362335	LMAN1	P49257
33.6461	33.4426	33.3855	33.5399	33.5951	33.6499	33.6963	33.7843	0.0437076	0.0660184	0.177876	ENO1	P06733;K7EM90
28.6816	28.7309	28.6053	28.7379	28.4311	28.4549	28.4439	28.7002	0.0437907	0.0662604	-0.181398	PFKM	P08237
26.9282	26.3004	27.0445	27.0674	27.264	27.3007	27.2676	27.8388	0.0438568	0.0663086	0.582645	SMARCA4	Q9HBD4;P51532;A0A0A0MT49
23.8185	24.5399	24.9692	24.9001	25.379	25.39	24.9202	25.5613	0.0438916	0.06645	0.755692	APPL1	Q9UKG1
25.0212	25.2127	25.4377	25.1902	25.0037	24.6486	24.8705	25.0629	0.0439869	0.0666045	-0.31902	PARN	O95453;H3BRK1
27.864	27.5321	27.5664	27.4839	27.6485	28.0138	28.0472	28.0785	0.0441089	0.066812	0.335359	MAPK1	P28482
27.9358	28.221	28.1887	28.2273	28.4362	28.278	28.2828	28.3875	0.0441512	0.0668695	0.202919	TNPO1	Q92973
34.0132	34.0139	33.7182	33.9027	34.2001	34.3036	34.0486	34.046	0.0444297	0.0670381	0.237541	HIST2H2BE;HIST1H2BB;HIST1H2BO;HIST1H2BJ	Q16778;P33778;P23527;P06899
26.988	26.8204	26.7971	26.9832	26.9892	27.0239	27.2521	27.3453	0.0443696	0.0670473	0.255431	OPA1	O60313;E5KLK1;E5KLJ6;E5KLJ9;E5KLJ5
23.9163	23.3753	23.4418	23.921	24.0388	24.2524	24.1412	25.0967	0.0444908	0.067082	0.718666	ZC3H18	E7ERS3;Q86VM9;H3BP01
25.5745	26.5642	26.3842	25.9331	26.7833	26.4971	26.6854	26.9598	0.0443275	0.067103	0.61742	NCAPD2	Q15021;E7EN77
23.8223	24.3949	23.2798	23.1908	24.7159	24.4674	24.6664	24.048	0.0447053	0.0674139	0.802464	CCDC51	Q96ER9;C9JSW8
21.4024	21.4847	21.5516	21.3626	21.233	21.311	21.3333	20.9626	0.0448666	0.0676397	-0.240359	FUK	J3KSP6;Q8N0W3
24.6867	24.0423	23.5105	22.804	22.0844	21.3677	23.5822	21.2387	0.044889	0.0676499	-1.69263	ITGAL	P20701
22.6238	22.2303	22.1777	22.7814	22.8262	23.1992	22.7822	22.805	0.0448467	0.0676956	0.449867	PIP4K2C	Q8TBX8;H0YIJ6
26.7259	26.5702	26.2754	26.1075	25.06	26.2089	25.9731	25.5009	0.0451779	0.0680231	-0.734003	PNPO	Q9NVS9;J3QQV6
24.0619	23.8628	23.5568	23.9183	24.4941	24.3626	23.8739	24.489	0.0459575	0.0694498	0.454924	MRPS31	Q92665
23.7664	24.5011	23.8976	23.4674	24.374	25.1564	24.566	24.3899	0.0459558	0.069507	0.713459	HSPE1-MOB4	S4R3N1
27.6946	27.7191	27.6985	27.4633	28.0018	27.7	27.8445	28.1	0.0460453	0.0695605	0.267694	BUB3	O43684;J3QT28
25.696	25.9435	25.8993	25.7546	26.2314	25.9828	25.9399	26.4334	0.046185	0.0695698	0.323548	MRPL46	Q9H2W6
23.0714	22.554	23.9217	23.3889	21.7643	20.8854	22.1534	22.9544	0.0461693	0.0695744	-1.29464	UBFD1	H3BRL3;O14562;H3BUM8
25.7138	25.4366	25.8853	25.9278	25.6187	25.3053	25.3459	25.3692	0.0461346	0.0696086	-0.331109	TRIP10	W4VSQ9;Q15642;M0R2H7;M0R0F9
25.0825	25.9805	26.4313	26.5881	23.7818	22.7928	25.8461	24.4163	0.0463283	0.0697785	-1.81134	GM2A	P17900;H0YBY3
22.6496	22.8928	23.6097	21.5367	23.5354	23.6303	23.9161	24.8496	0.0465158	0.0702164	1.31064	TEC	P42680
25.5282	25.2336	25.8099	25.396	25.3652	25.0016	25.1226	24.8752	0.0467043	0.0706241	-0.400792	AGFG1	B8ZZY2;P52594;C9J2I0
20.4216	22.3405	22.3753	22.343	23.3117	22.711	23.049	23.5633	0.0467617	0.0706743	1.28864	ESF1	Q9H501
28.7329	28.5786	28.5938	28.4758	28.8011	28.8827	28.7222	28.6733	0.0469216	0.0708562	0.174567	GRB2	P62993
21.5693	20.4701	19.6683	20.5399	21.7859	22.196	21.9887	20.9818	0.0469157	0.0709141	1.17618	MARK3;MARK1	A0A0A0MST9;A0A0A0MQR8;A0A0A0MSZ1;A0A0A0MT23;J3KNR0;P27448;H0YIY6;B4DIB3;A0A087X0I6;Q9P0L2
28.4052	28.48	28.3932	28.5273	28.6061	28.752	28.5627	28.5023	0.0470863	0.0713437	0.154315	CACYBP	Q9HB71
22.4685	22.8666	23.0718	22.8354	23.1596	23.0116	23.1563	23.2781	0.0471009	0.0713834	0.340848	PPP4R1	Q8TF05
27.9003	27.2684	27.0366	27.1109	27.853	28.0737	27.8748	27.6522	0.0471015	0.0713904	0.534362	GNAS	P63092;Q5JWF2
25.6596	24.5921	25.163	25.2685	25.8185	25.6584	25.7677	25.6685	0.0471606	0.0715147	0.557495	UTP6	Q9NYH9
23.9313	24.4273	24.362	24.5144	23.3115	23.8524	23.2985	24.2116	0.0473119	0.0717106	-0.640231	KRR1	Q13601
21.5236	21.9292	21.9859	21.6885	22.8741	23.1179	21.8666	22.2842	0.0473825	0.0717465	0.753916	THEM6	Q8WUY1
25.9633	26.5676	26.4211	26.3655	26.6815	26.6592	26.6242	26.6444	0.0472818	0.0717689	0.322989	DNPEP	E7ETB3;Q9ULA0;E7EMB6
24.9642	24.5958	24.5891	24.9396	25.1512	24.8318	25.3812	25.4423	0.0476253	0.0718833	0.429453	ACOX3	O15254
25.1964	25.5834	25.1907	24.9215	25.0407	24.6751	24.6477	24.8914	0.047815	0.0718934	-0.409273	RDH11	Q8TC12;G3V2G6;G3V234;H0YJ46;H0YJ10;H0YIZ8
23.6756	23.6411	23.4409	24.0063	23.7206	24.4452	24.5	25.0581	0.0477494	0.0719062	0.739987	ARMC8	Q8IUR7;B7Z637;C9JAA7;C9JBY2;G5E9V6
24.8357	24.6896	24.8391	24.6444	24.4056	24.4909	24.2196	24.7296	0.0475646	0.0719092	-0.29078	ENY2	Q9NPA8
26.1776	26.3234	25.9692	26.2071	26.2949	26.4573	26.6405	27.0433	0.0476873	0.0719158	0.439661	NCALD	P61601;E5RIZ1;E5RGA9;E5RHC8;E5RIG4;E5RIA5
29.063	29.6627	29.5523	29.4984	29.705	29.7995	29.735	30.0097	0.0477487	0.0719644	0.368174	MATR3	A0A0R4J2E8;A8MXP9;P43243;D6REM6;D6R991
22.3784	23.1806	22.6405	22.3531	23.2914	23.236	23.3335	22.8714	0.0475206	0.0719675	0.544906	DOHH	Q9BU89;K7ERU8;K7EIV2
26.8744	26.4314	26.4275	26.6573	26.2169	25.9356	26.2565	26.4681	0.048158	0.0724939	-0.378369	PPP3CA	Q08209;E7ETC2
25.311	25.6778	25.3657	24.6088	26.0913	25.8311	26.0452	25.5449	0.0483209	0.0727065	0.637307	THOC3	Q96J01;D6RGZ2
23.956	24.9377	24.5332	24.5372	25.1954	24.9186	24.8363	25.25	0.048335	0.0727123	0.559036	TRMT1L	Q7Z2T5
23.3766	22.4859	22.3352	23.3723	21.4943	22.2517	22.3629	22.1005	0.048581	0.073124	-0.840147	NCOR2	C9J7T7;C9JE98;C9J0Q5;C9JFD3;Q9Y618
25.6139	24.7385	24.7213	24.8006	23.8206	24.3179	24.2475	24.7068	0.048735	0.0733012	-0.695383	GMFB	P60983;G3V4P8
27.7136	28.0335	27.8467	27.7762	28.1257	27.9481	27.988	28.1562	0.0486926	0.0733323	0.212006	SAMHD1	Q9Y3Z3
25.6693	26.016	26.2187	26.3152	25.6017	25.9027	25.5673	25.3822	0.048715	0.0733601	-0.441267	TMX1	Q9H3N1
33.6679	32.8359	32.662	32.5753	31.5048	32.7461	31.832	32.0858	0.0490916	0.0738112	-0.893091	TMSB4X	P62328
24.4152	25.0085	24.6852	24.4801	24.9547	24.9703	24.9202	25.1669	0.0490722	0.0738703	0.355771	INTS5	Q6P9B9
22.3475	22.4381	22.5455	22.6823	22.8962	22.6915	22.6181	22.724	0.0490449	0.0738974	0.229091	ANKFY1	Q9P2R3
26.5255	26.7788	27.0273	26.8075	26.1299	26.3426	26.5949	26.5838	0.0489909	0.0739054	-0.37197	UGDH	O60701
25.0319	24.8687	24.7679	24.698	24.463	24.4392	24.4762	24.8291	0.0489644	0.0739197	-0.289759	OGT	O15294
29.1181	29.4174	29.2958	28.9145	28.7434	28.9279	28.7167	29.0419	0.0495298	0.0743554	-0.328996	RPL12	P30050
23.6999	24.2142	23.9853	24.319	24.3257	24.3133	24.5339	24.8044	0.0494592	0.0743911	0.439703	DIS3L2	Q8IYB7;H7C440
22.9912	22.8664	23.0219	23.6282	24.3363	23.3568	23.5336	24.3613	0.0494839	0.0744147	0.770081	HSP90AB4P	Q58FF6
22.8621	22.5359	22.2603	22.9354	23.1235	23.0941	22.8722	23.5052	0.0494563	0.0744505	0.500328	SH2D3C	Q8N5H7
26.6927	26.7709	26.5597	26.6113	26.6377	27.0314	26.9901	26.9812	0.0496512	0.0744968	0.251423	GPHN	F5H039;Q9NQX3;G3V582
22.9833	22.7205	22.7211	22.7039	22.9765	23.3388	23.1523	22.869	0.0494364	0.07451	0.301944	ERLIN1	O75477;B0QZ43
22.8161	21.7596	21.8544	21.2376	19.9946	20.6608	21.1041	21.4493	0.0496828	0.074673	-1.1147	SIL1	D6REA1;Q9H173
23.976	23.9722	23.7513	23.3947	23.1999	22.2022	23.4659	23.1895	0.0498611	0.0749857	-0.759161	TRAF4	Q9BUZ4;Q2KJU6;F6SA91
22.1869	23.034	22.7087	23.1444	22.7903	23.9558	23.8234	24.2071	0.0500757	0.0752635	0.925669	ORC4	O43929
27.139	27.3335	27.1891	27.0512	27.0267	26.8542	27.116	26.8612	0.0500396	0.0753233	-0.213636	AP2A1	O95782
26.3565	26.5677	26.4997	26.7992	26.8263	26.6591	26.8898	26.8992	0.0505483	0.0762633	0.262824	ADRBK1	P25098;E9PRV7
23.2765	23.8953	23.6983	24.2126	24.2596	24.2481	24.2029	24.2898	0.0506212	0.0762916	0.479445	OPA3	Q9H6K4
25.0816	25.0486	25.1716	25.8084	24.7013	24.7349	25.0294	24.7512	0.0506806	0.0763579	-0.47333	RGS10	O43665
25.5744	26.0408	25.8135	25.5775	25.8944	26.0263	26.3416	26.5384	0.0508063	0.0765222	0.448632	GALK1	P51570
21.6388	22.6242	22.3769	22.2582	22.7162	22.9535	22.7071	22.6584	0.0510859	0.0768506	0.53428	STK38	Q15208
23.0219	23.7046	23.1486	23.5995	23.901	23.606	23.7921	23.9765	0.0512417	0.0770869	0.450285	ATAD3B	Q5T9A4
23.5334	22.5839	22.8591	22.7239	22.5424	21.5481	22.2062	22.4303	0.0513465	0.0772439	-0.743324	EIF2AK4	H0YME5;Q9P2K8
24.1666	25.3541	25.4435	24.9465	25.8938	26.1523	25.9581	25.2729	0.0518934	0.0782484	0.841592	TST	Q16762
25.1283	24.7882	25.2669	25.2495	24.9856	24.2272	24.7991	24.4537	0.0518644	0.07831	-0.491794	BTAF1	A0A0A0MTH9;O14981
22.7138	23.0494	23.3211	23.7427	23.426	23.9609	23.8639	24.2085	0.0519313	0.0783126	0.658086	CWC22	B7WP74;Q9HCG8
24.7509	25.3732	25.6234	25.4657	25.6721	25.8809	25.8883	25.7044	0.0518297	0.0783717	0.483105	WDR12	Q9GZL7
22.8883	22.2684	22.0033	21.6282	22.8812	22.5807	23.5386	23.0062	0.0517063	0.0783912	0.804612	KIF15	Q9NS87;C9JKA9;H7BZT2
27.9796	28.3921	28.1846	27.917	27.7268	27.7757	27.7904	27.9929	0.0518279	0.0784334	-0.296881	ACTR1A	P61163;R4GMT0;A0A1B0GVS3
25.7846	22.7017	22.4822	23.2082	25.5183	25.1338	25.6576	25.315	0.0521557	0.0784357	1.86198	KDM1A	O60341
25.5459	25.3001	25.5172	25.3146	25.8341	25.4831	25.5891	25.8185	0.0520612	0.0784867	0.261793	HNRNPK	Q5T6W2
28.7347	28.8581	28.371	28.516	28.872	28.7846	29.0015	29.2273	0.0521226	0.0784973	0.351396	TRIM4	Q9C037;H7C0Q6
27.9704	27.8475	27.851	27.9242	27.8617	28.3284	28.187	28.2415	0.0522324	0.0786406	0.256399	NUMA1	Q14980
26.297	26.5946	26.6598	26.5773	26.9055	26.6317	26.7941	27.216	0.0525745	0.0788995	0.354693	SRP68	Q9UHB9
24.9764	23.1947	23.226	23.726	24.5423	24.9397	25.0352	24.7608	0.0524057	0.0789233	1.03872	HLA-E	Q6DU44;P13747
24.4674	24.6134	24.3009	24.8341	24.6636	24.8564	25.1557	25.2904	0.0525732	0.078961	0.437579	AKT2	M0R0P9;P31751;J3QKW1
27.3159	27.9163	27.7249	27.4962	27.2544	27.2723	27.1833	27.4048	0.052844	0.0789673	-0.334622	SLIRP	Q9GZT3;A0A087WUN7;H0YJ40;G3V4X6;G3V2S9;H0YJW7
28.7681	28.468	28.2437	28.1561	27.4258	28.0953	28.0454	28.0467	0.052751	0.0790062	-0.505667	MTPN	P58546;C9JL85
22.4233	25.4224	23.7707	24.6208	26.4429	25.3861	25.3647	25.6861	0.0525251	0.0790125	1.66064	COPG2	Q9UBF2
22.1556	19.7419	20.9804	20.6208	23.0205	21.3379	22.2792	23.0554	0.0525732	0.0790226	1.5486	HPCAL1;HPCA	P37235;P84074;E9PC71
24.4682	24.3655	23.5991	22.7136	23.1796	22.7331	21.0479	22.2687	0.0524741	0.0790242	-1.47929	UBXN4	Q92575
26.0527	26.1097	25.9842	26.3678	25.715	25.9662	25.9998	25.6024	0.0528124	0.0790288	-0.307745	ABHD10	Q9NUJ1
23.4315	24.2392	23.7173	24.2968	24.6694	24.4414	24.4517	24.2744	0.0531921	0.0796861	0.53801	CHAMP1	Q96JM3
26.5109	20.2623	20.2135	20.7236	17.5514	18.3268	18.7394	18.1988	0.0533287	0.0797516	-3.72348	SSR2	P43308
25.0213	25.0354	25.2974	24.7972	23.3473	24.1311	24.6224	24.7926	0.0534729	0.0798388	-0.814452	RAP1GDS1	P52306
21.0752	21.9969	21.4866	21.501	21.0313	21.0768	20.8788	21.1715	0.0534228	0.0799007	-0.475319	TIMM22	Q9Y584
26.9529	27.0311	27.3582	27.2405	27.3432	27.3336	27.5189	27.8532	0.0537162	0.0802386	0.366525	SH3KBP1	Q96B97;Q5JPT2;Q5VSN0
22.648	24.2768	24.4594	24.5504	25.5516	25.2243	24.867	24.868	0.053771	0.0802879	1.14406	NCF4	A0A0G2JR51;Q15080;B0QY04
24.2005	24.1024	23.8366	23.9929	24.3251	24.1341	24.6258	25.0029	0.0544065	0.0806163	0.48889	NAA35	Q5VZE5
26.1661	27.0116	26.9154	26.8636	27.247	27.2821	27.2379	27.0834	0.0543254	0.0806291	0.473442	RBM39	Q14498;G3XAC6;A0A0U1RQH7;H0Y4X3
28.1247	27.687	27.5076	27.5171	27.0678	27.5896	26.9666	27.3012	0.054233	0.0806486	-0.477781	LMAN2	D6RBV2;Q12907;D6RIU4;D6RDX1
26.0511	25.6639	25.7531	25.8036	25.3126	25.7912	25.5078	25.2312	0.0541832	0.0806893	-0.357211	GPX4	A0A087X2I2;A0A087WT12;P36969;K7ERP4;K7EJ20;K7EKX7;K7ENB4;R4GNE4;A0A0A0MTT1
26.7128	25.7037	25.6652	25.6795	25.0929	25.5222	24.8027	25.4266	0.0542882	0.0806914	-0.729199	PSMD10	O75832;B1AJY5;B1AJY7
22.0424	23.366	23.3026	23.1661	24.2953	23.139	24.191	24.2294	0.0540768	0.0807208	0.994405	WDR55	Q9H6Y2
21.4215	22.9534	22.5294	22.492	23.2046	23.3613	23.0284	23.0121	0.0544877	0.0807513	0.802525	PCBP2	F8VRH0
29.5932	30.0207	29.8512	29.6815	30.1902	29.9425	30.0292	30.015	0.0545354	0.0808369	0.257588	PPP1CA	P62136;E9PMD7
28.6865	27.3951	28.9169	28.6453	27.2996	28.0643	27.2644	27.2166	0.0545941	0.0808455	-0.949739	SNRPG;SNRPGP15	P62308;A8MWD9;Q49AN9;F5H013;C9JVQ0
26.4812	27.4675	27.1749	27.2552	27.5248	27.626	27.5662	27.7486	0.0546931	0.0810108	0.521662	GPS1	C9JFE4;A0A096LP07;A0A096LPJ3;A8K070;Q13098;J3KSA5
25.4298	25.9789	25.8866	25.9363	26.317	26.3885	25.8745	26.2951	0.0547786	0.0810622	0.410882	CCAR1	Q8IX12;A0A0C4DGG8;F5H2E6;F5H1H2
22.7958	23.7775	23.0285	23.3261	22.2251	22.4894	22.8214	22.8947	0.05485	0.0810736	-0.624311	MRPS12	O15235
26.5764	26.3733	26.5492	26.3904	26.7872	26.5861	26.5457	26.8778	0.0549632	0.081131	0.226865	CUL3	Q13618
29.4372	29.8359	29.637	29.7709	29.3234	29.4722	29.5454	29.3835	0.055092	0.0812527	-0.239164	CAPZA1	P52907
31.9017	32.4485	32.1793	32.0512	31.9796	31.7825	31.7321	31.8705	0.0551768	0.0812823	-0.303996	ATP5B	P06576;H0YH81;F8W079
22.7353	23.4335	23.2774	23.1672	22.5124	22.304	22.3871	23.1316	0.0552417	0.0813751	-0.569571	SCFD2	Q8WU76;A0A087WUD7
26.8146	27.2098	26.7505	26.9514	27.297	26.9696	27.4565	27.535	0.0552388	0.0814373	0.38295	SON	P18583
26.8445	27.3319	27.1771	27.1764	27.2367	27.4112	27.5312	27.522	0.0554318	0.0816641	0.292805	TRIM21	P19474
23.5418	24.4985	24.2103	23.2136	23.0624	23.3178	22.0603	23.1402	0.0554848	0.0817239	-0.970884	SEL1L	Q9UBV2
24.7526	23.8925	23.4944	23.8077	24.9761	24.4998	24.6594	24.556	0.0555341	0.0818445	0.686027	PHIP	Q8WWQ0
28.9083	29.388	29.3108	29.1162	29.4475	29.3941	29.4826	29.431	0.055627	0.081901	0.257948	EIF3B	P55884
24.7265	25.0818	25.5237	25.2033	25.5378	25.354	25.7752	25.6349	0.0560843	0.082758	0.441626	TBCD	J3KR97;Q9BTW9
22.2256	22.5152	22.171	22.244	22.6342	22.8217	22.4988	23.5682	0.0562107	0.0830205	0.591799	AKAP17A	X6RAJ1;Q02040
26.8389	26.5379	26.5557	26.1058	26.7535	26.837	26.9533	27.0456	0.0562653	0.0831277	0.387743	PPP5C	H0YDU8;P53041;A8MU39
24.0772	24.7461	24.6054	25.1161	25.1579	25.0761	25.0736	25.6517	0.0564432	0.0832055	0.603633	THOC2	Q8NI27;A0A0C4DG98
23.0923	25.1393	24.6752	23.9091	22.9359	23.3729	22.914	23.2256	0.056367	0.0832103	-1.09186	GLS	B8ZZA8;B8ZZC5;C9JIJ6
23.7538	24.7349	24.5241	24.312	23.688	23.4588	23.8103	24.0569	0.0564416	0.0832686	-0.577726	TIFA	Q96CG3
21.9725	22.0079	22.3052	21.7569	22.6096	23.6151	22.2977	22.4898	0.0566889	0.083464	0.742473	METTL14	Q9HCE5;D6RBL4
25.9978	27.1399	27.117	26.6878	27.705	27.2622	27.3824	27.2864	0.0566201	0.0834788	0.673345	SF1	Q15637
24.3298	25.195	25.1195	24.8039	24.4916	24.3706	24.3928	24.3098	0.0569072	0.0837158	-0.470835	GIT2	R4GNG3;Q14161;F8W822;F8WAK2;F8VXI9
25.1413	25.2385	25.3661	24.6907	24.3257	24.8337	24.8373	24.6544	0.0569036	0.0837791	-0.446381	DGUOK	Q16854
26.5344	26.0318	25.8285	26.1196	25.7274	25.8006	25.4295	24.5819	0.0569981	0.0839003	-0.743716	MOGS	Q13724;C9J8D4
25.5997	25.9061	26.1991	26.0585	26.5066	26.3373	26.0286	26.7303	0.0572327	0.0841449	0.459878	SRSF11	Q5T760;Q05519;B4DWT1
27.6597	27.5764	27.3703	27.5103	27.9055	27.6105	27.7612	27.6712	0.0572969	0.0841659	0.207912	BLMH	Q13867;K7ES02;K7ESE8;J3KSD8
28.2415	28.046	27.9476	27.9316	28.2699	28.1896	28.2006	28.1976	0.0573602	0.0843135	0.172753	SDHB	P21912;A0A087WWT1;A0A087WXX8
26.5802	26.8447	26.9845	26.8547	26.491	26.4762	26.5515	26.7516	0.0574331	0.0843404	-0.24843	HSPA4L	O95757;E9PDE8;D6RJ96
31.9658	32.1641	31.9667	32.0008	31.7396	31.7716	31.8264	32.0213	0.0577292	0.0850737	-0.184649	GPI	P06744;A0A0A0MTS2;K7EQ48;A0A0J9YXP8;A0A0J9YYH3;A0A0J9YX90;K7EPY4
26.5826	26.5962	26.3572	26.5819	26.4131	26.4486	26.3221	26.2455	0.0577467	0.0850789	-0.172168	SMAP2	Q8WU79;X6RCC3;A0A087WV97
25.3935	25.6594	25.5503	25.4208	25.4291	25.2897	25.1083	25.3404	0.0577011	0.0851377	-0.214097	EMC1	Q8N766
32.9339	32.6635	32.6065	32.8399	32.8706	33.126	32.9171	33.0169	0.0581641	0.085154	0.221657	TPI1	P60174
27.3206	28.1341	27.9845	27.6266	27.3608	27.4967	27.2278	27.0741	0.0581258	0.0852096	-0.47658	HN1	J3KT51;Q9UK76;J3KSH8
26.7816	26.5872	26.8395	27.0675	26.5204	26.5174	26.5952	26.6634	0.0581637	0.0852177	-0.244853	HMHA1	K7ES98;K7EM85;Q92619;F5H1R4
23.4762	23.8509	23.9713	23.7462	23.0276	23.5158	23.6534	23.1288	0.0578242	0.0852222	-0.429764	MRPL33	O75394
25.196	25.2176	25.5723	25.5514	25.6753	25.7406	25.6671	25.5142	0.0580084	0.0852255	0.264959	TBC1D22A	Q8WUA7;B0QYI1;A0A0A0MRY0
27.0495	27.2871	27.458	27.3221	26.9566	26.5478	26.9531	27.1856	0.0579732	0.0852294	-0.368385	UBA7	P41226
21.8609	22.4442	22.6574	23.4134	23.3553	23.9675	23.3253	23.1574	0.0579712	0.0852933	0.857378	CD300A	Q9UGN4;J3QKQ4
23.9882	23.7138	23.7961	23.5318	23.0088	23.8101	23.1428	22.6734	0.0583814	0.0855624	-0.598713	ATP8A1	Q9Y2Q0
24.0326	24.8185	25.0745	24.928	23.9323	24.2992	24.0205	24.2707	0.0586151	0.0859075	-0.582737	POP1	Q99575
27.1751	27.3185	27.4402	27.2717	27.1924	26.8465	27.055	27.1929	0.0586764	0.0859508	-0.229677	DOCK8	Q8NF50;A2A369
26.6901	27.0586	27.0234	26.858	26.5943	26.4513	26.6378	26.8484	0.0588114	0.0861073	-0.274559	DCTN2	Q13561;F8W1I6;F8VW18;F8VRV7;H0YI98
25.0168	25.4696	25.4558	25.1915	25.5015	25.6464	25.4476	25.6877	0.0590047	0.0863596	0.287393	GMIP	Q9P107
26.9612	26.8527	27.1444	26.6814	26.5879	26.6847	26.6783	26.74	0.059124	0.0864036	-0.237216	TFG	Q92734;C9JJP5;C9JUE0;C9JTY3
23.7925	23.2923	24.5295	24.2629	24.6208	24.8829	24.7382	24.3653	0.0589918	0.0864238	0.682485	UBR7	Q8N806;H0YJM2;H0YJY4;E9PCJ7
24.6473	24.5343	24.8637	24.6162	24.3066	24.4949	24.5791	24.4383	0.0591166	0.0864677	-0.210634	RABGAP1	Q9Y3P9
30.5086	30.8494	30.9128	30.8679	30.6909	30.506	30.511	30.3983	0.0589918	0.0864881	-0.258154	MYL6	F8W1R7;G3V1V0;P60660;J3KND3;G8JLA2;B7Z6Z4;F8VPF3;G3V1Y7;F8VZU9;F8W180
26.9356	26.8405	26.8098	26.6583	26.9557	26.957	26.9654	27.2752	0.0589656	0.0865048	0.227309	SNRPA	P09012;M0R268;M0QXK2;M0R221;M0R2B8;M0QZG7;M0R0G9
24.84	24.4425	24.8604	24.7713	24.4344	24.5704	24.5433	24.2998	0.0597178	0.0874151	-0.266546	CCDC88A	Q3V6T2;A0A087WXD9
21.4498	22.08	22.3005	22.5335	21.5008	21.6848	21.5754	21.3451	0.0596872	0.0874797	-0.564406	DPYD	Q12882
21.5128	21.4785	21.4668	21.4173	22.4471	22.4339	21.5142	21.723	0.059602	0.0875056	0.560682	RAPGEF2	Q9Y4G8
30.4965	30.7976	30.6725	30.6006	30.9818	30.7582	30.9201	30.727	0.0595806	0.0875289	0.204984	GDI2	P50395;Q5SX87
21.5672	21.9017	22.1153	22.0002	22.7442	21.8892	22.3929	22.6245	0.0596529	0.0875444	0.516606	PRKAR1B	H7BYW5;P31321;C9JSK5
23.7973	23.543	23.8508	23.3996	23.5063	23.2161	23.3772	22.8589	0.0595516	0.0875938	-0.408064	MRPS24	Q96EL2
22.8945	22.8049	23.0648	22.9992	22.7548	22.4661	22.5427	22.9154	0.0598554	0.0876841	-0.271124	TOR1AIP2	Q8NFQ8
23.6442	23.7793	23.8585	23.3145	23.7395	24.0895	24.0232	24.1029	0.0601882	0.0880944	0.339676	SARS2	M0QWZ7;Q9NP81;M0R2C6;M0R259
30.7798	30.9324	31.0157	30.989	31.3098	31.4464	31.2228	30.9046	0.0606939	0.0886156	0.291681	HNRNPK	P61978
26.5237	25.8735	25.8828	25.7814	25.5226	25.4964	25.5886	24.4109	0.0604941	0.088622	-0.760737	PPP1R18	A0A0G2JHC2;Q6NYC8
23.5899	23.239	24.4243	22.8276	22.8507	21.6554	23.1274	21.3593	0.0607983	0.0887529	-1.27198	SMC6	Q96SB8;C9JMN1
23.8585	24.547	23.2703	24.4774	24.9174	24.4611	25.1059	24.7076	0.0607503	0.0888182	0.759708	ARID3A	Q99856;K7EJ04
23.9828	24.8695	24.9032	24.3662	25.6252	25.3753	25.1672	24.6869	0.0608187	0.0888317	0.683247	GNA13	Q14344
24.3255	25.012	24.887	24.834	23.9725	24.5355	24.4026	23.3846	0.0608957	0.0889692	-0.690859	SLC25A20	O43772;C9JPE1
26.1193	26.5796	26.3786	26.4076	26.4399	26.874	26.6273	27.0288	0.0610105	0.0889795	0.371233	SLC9A3R1	O14745
29.7776	29.1607	29.2529	29.2147	28.8209	28.996	29.058	29.0971	0.0609725	0.0889949	-0.358454	PDIA6	Q15084
27.5155	28.0037	28.4311	28.1795	27.6342	27.7985	27.1546	27.3026	0.0610706	0.0890161	-0.559953	SYNGR2	O43760;K7ELS8
22.1994	20.3466	20.6144	21.6301	22.2702	21.8925	22.2594	22.5418	0.061049	0.0890403	1.04334	TRAPPC11	Q7Z392;D6RHE5
25.9237	26.3877	26.2436	26.2044	26.483	26.4455	26.3944	26.3625	0.0611671	0.0890593	0.23152	WDR36	A0A0A0MTB8;Q8NI36
21.2491	21.4298	21.6013	21.6734	22.1444	22.0358	21.4808	21.8868	0.0612914	0.0893333	0.398568	HSPA8	A8K7Q2;E9PS65
27.657	28.0656	27.8086	27.847	27.7526	27.5781	27.561	27.6154	0.0614973	0.0895632	-0.217756	DPP3	G3V1D3;G3V180;Q9NY33
22.4631	24.308	24.3518	24.1967	22.8288	22.0982	23.0199	22.7892	0.0615246	0.0897343	-1.1459	CRELD2	Q6UXH1;A6PWM2
24.5135	23.824	23.6952	24.4491	24.3663	24.548	24.954	25.058	0.0619262	0.0903224	0.611127	UBE2Q1	Q7Z7E8
27.9728	28.1517	28.0945	28.063	28.193	28.2715	28.1175	28.1552	0.0622412	0.0910204	0.113851	NUP210	Q8TEM1
21.4443	22.2844	22.8365	22.2436	22.7693	22.6658	23.0132	23.193	0.0626225	0.0915543	0.708116	MACC1	Q6ZN28
26.1182	26.7539	26.4379	26.3357	26.214	26.1366	25.8714	26.0423	0.0626775	0.0916856	-0.345374	TROVE2	P10155
20.7732	20.1168	20.1808	20.9123	20.9205	21.0827	20.7995	21.191	0.0627695	0.0917178	0.502628		H0Y858
24.6535	23.2824	23.571	24.0922	24.8489	24.5774	24.4278	24.6106	0.0628769	0.091814	0.716405	AQR	O60306
24.1648	23.4651	23.2981	23.4992	24.1428	24.0076	23.8925	24.301	0.0630276	0.0919332	0.479193	CHD1	O14646
22.0329	20.7558	22.2095	22.0352	22.7532	23.321	23.6523	21.9203	0.0632451	0.0919971	1.15335	SRPK2	P78362;H7C521
23.4891	23.2653	23.3774	23.1903	24.0933	24.682	24.2923	23.1917	0.0629904	0.092	0.734287	SLK	Q9H2G2
23.0233	22.9593	23.2536	22.6714	23.2008	23.1286	23.4906	23.4517	0.063218	0.0920261	0.341034	C9orf114	Q5T280;R4GNG4
23.1024	23.2484	22.9545	22.9367	22.3003	22.3323	22.3142	23.1923	0.0632019	0.0920493	-0.52574	RMND1	Q5SZ82;A0A087WXU0;Q9NWS8
29.005	28.9056	29.055	28.8189	28.8661	28.781	28.6458	28.3415	0.0633526	0.0922547	-0.287529	RPL30	P62888;E5RI99
26.682	26.1293	26.0569	26.0753	26.6185	26.514	26.5137	26.7416	0.0636199	0.0926474	0.361086	PPP2R2A	P63151
22.7418	23.8866	23.6518	23.845	23.8287	24.5222	24.2167	24.3317	0.0636016	0.0927144	0.693504	VCAM1	E9PDD2;P19320
25.5295	25.4086	25.2004	25.3981	25.5514	25.4714	25.7889	26.037	0.0637782	0.093083	0.328038	TNFAIP3	A0A087WU80;P21580;D3TTY5;A0A087WXL5;A0A087X1N1
25.0725	24.4833	24.7053	25.0403	25.0139	25.081	25.3657	25.3936	0.0638806	0.09314	0.388193	BRAF	P15056;H7C560
29.6621	29.8082	29.7187	29.6551	29.4997	29.6547	29.5761	29.6513	0.0640179	0.093318	-0.115541	COPB2	P35606
25.4028	25.1705	25.5834	25.6166	25.1384	25.0633	24.9445	25.3803	0.0641331	0.093513	-0.311703	ERGIC1	Q969X5
22.7907	23.134	23.7383	24.0342	21.8316	23.0905	22.7274	20.8592	0.0642076	0.0935695	-1.29712	RHOT2	Q8IXI1;I3L2C6
22.5335	22.7494	22.7891	22.5981	22.3292	22.4949	22.5589	22.5538	0.0643843	0.0938375	-0.183334	NEDD1	Q8NHV4
22.1968	21.9669	20.5723	21.9439	22.2895	22.92	22.3332	22.7837	0.0643225	0.093905	0.911602	KDM3A	F5H070;Q9Y4C1
29.0009	29.221	29.2533	28.9544	29.257	29.2408	29.2951	29.466	0.0645631	0.0939411	0.207328	UBE2I	H3BQQ9;B0QYN7;P63279;H3BPC4
26.7783	27.0569	26.8687	26.6679	26.8142	26.5886	26.3124	26.1986	0.0645165	0.0939569	-0.364485	SKP1	E5RJR5;P63208;E7ERH2;F8W8N3
25.166	25.5043	25.4523	24.8931	24.7129	24.8313	24.5564	23.1474	0.064637	0.0940416	-0.941938	OXA1L	E7EVY0;S4R3Q9;J3KNA0;Q15070;C9JC63
23.084	23.806	23.6241	23.7713	22.0869	22.895	23.1133	23.3205	0.0646288	0.094109	-0.717423	TEP1	G3V5X7;Q99973;G3V2A4;G3V470
25.8225	26.1233	26.548	26.253	25.9921	25.4953	25.7759	25.8339	0.0647721	0.0941519	-0.412398	FAM120A	Q9NZB2
31.3437	31.2588	31.2294	31.0499	31.4072	31.3469	31.3303	31.3751	0.0650523	0.0943679	0.144413	EIF4A1	P60842;J3KT12;J3QS69;J3KSZ0;J3QL43
32.3562	32.2068	32.0634	32.019	32.0261	31.9358	31.8488	32.0396	0.0652707	0.094824	-0.198792	ATP5A1	P25705;K7EK77
26.5539	26.2452	25.9829	26.1647	25.7098	26.129	25.964	25.7712	0.0655444	0.09486	-0.343157	SEPT11	D6RGI3;D6RER5;Q9NVA2;D6RDU5;H0Y961
22.238	24.2808	24.0666	23.6867	21.8039	22.3838	23.188	20.8979	0.0654766	0.0948706	-1.49964	GOSR1	B4DQA8;K7EJC8;E9PCW1;O95249;G5E9T8
27.3949	27.1808	27.2164	27.2029	26.8522	26.903	26.9223	27.2973	0.0657048	0.0951064	-0.255058	SERPINH1	P50454;E9PPV6;E9PKH2;E9PR70
22.7254	21.5627	21.637	20.9244	19.0506	20.8715	21.399	18.768	0.0660177	0.0952518	-1.69008	GTPBP6	H0Y2S1;O43824
24.1023	24.3221	23.8991	24.4671	24.573	24.4019	24.4405	24.5559	0.0660069	0.0952826	0.295189	DIMT1	Q9UNQ2
25.2977	25.1319	24.3939	24.9999	25.3137	25.2794	25.5108	25.6583	0.0660012	0.0953504	0.48471	COASY	Q13057
22.4046	22.4863	22.8386	22.6906	23.399	22.9427	23.1521	22.632	0.0659546	0.0953899	0.426437	GFM2	Q969S9;D6RAL1
27.2932	27.8021	27.8045	27.6512	27.3174	27.3604	27.2149	27.4759	0.0662479	0.0953945	-0.29557	HDLBP	A0A024R4E5;Q00341;H0Y394
25.9908	26.3433	26.2749	26.2612	25.7538	25.6822	25.7577	26.2715	0.066313	0.0954176	-0.35123	SLAMF1	Q13291;Q96QJ2
24.3359	23.2826	23.3427	23.8014	24.3243	23.9	24.5446	25.0005	0.0659524	0.0954579	0.75171	STK3	Q13188;A0A087WZ06
21.5183	21.6072	21.0699	21.3734	21.5276	22.2176	21.6429	21.9149	0.0664888	0.0956451	0.433578	TBC1D10A	Q9BXI6;F8W9Y7;H7C471;H0Y5R9;H0Y2U5;F8WCD1;B5MD46;H7C1Q1
24.019	23.3051	23.1215	22.6689	23.9483	23.7473	23.9085	24.1069	0.0666438	0.0957617	0.64912	PYCRL	A0A0A0MQS1;Q53H96;B5MD87
24.2026	23.7219	24.6464	24.1689	23.7228	23.9801	23.6042	23.5228	0.0667044	0.0958044	-0.477513	VAPB	O95292
27.2493	27.3963	27.2717	27.4985	27.6125	27.4341	27.7423	27.4547	0.0672397	0.0960565	0.206958	ARHGEF1	M0QZR4;Q92888;M0QYC1;M0R2C7
23.4868	23.2484	22.9126	23.4913	24.2883	23.6504	23.4151	23.8346	0.0672777	0.0960649	0.512319	TERF2	Q15554;U3KQ35;H3BR06;J3KSJ9;H3BTA7
22.7515	23.1385	23.5897	23.316	23.7078	23.4015	23.6444	23.7628	0.0672184	0.0960678	0.430208	QTRTD1	Q9H974
22.9353	23.5141	23.2657	23.3838	23.5133	23.5352	23.5206	23.7287	0.0671261	0.0961159	0.299712	SIRT3	E9PK80;E9PM75;E9PN58;Q9NTG7;E9PNA0
26.4923	25.6599	26.26	26.3932	26.1149	27.5913	27.1526	27.2338	0.0670808	0.0961414	0.821798	EWSR1	B0QYK0;Q01844;H7BY36;A0A0D9SFL3;C9JGE3
20.8457	22.3906	22.3559	21.0268	23.1731	22.4545	22.1486	23.4188	0.0669271	0.0961615	1.14401	KIF11	P52732
24.011	23.6695	23.4178	23.3167	24.3492	23.9111	23.8141	24.0723	0.0670665	0.0962095	0.432935	MAD1L1	Q9Y6D9;C9JP81
23.2475	21.234	22.848	24.1709	24.535	23.7675	24.2787	24.6607	0.0674511	0.0963214	1.43539	ARL2;ARL2-SNX15	P36404;V9GYD0
28.0589	26.2595	26.1582	26.4658	25.7335	25.9587	25.488	25.7043	0.0677541	0.0966188	-1.01448	PHPT1	Q9NRX4
23.2519	23.9971	23.7494	23.8497	23.1342	23.186	22.7678	23.6294	0.0676864	0.0966474	-0.532668	HACD3	H3BS72;Q9P035;H3BMZ1;H3BRL8;H3BPZ1
28.5142	28.3918	28.2277	28.2607	28.328	28.8175	28.7455	28.6277	0.0676407	0.0966761	0.281079	SRP9	P49458;E9PE20
26.4254	27.4201	27.2953	27.2956	26.9453	26.505	26.2752	26.0895	0.0678514	0.096677	-0.655402	RPN2	P04844;Q5JYR7
31.3937	31.2079	31.2347	31.2803	30.9908	31.0859	31.0939	31.2858	0.0678379	0.0967084	-0.165013	SPTAN1	Q13813;A0A0D9SGF6;A0A0D9SF54
24.9566	24.1098	24.0504	24.3674	24.9685	24.6383	24.8011	25.266	0.0681882	0.0968571	0.547391	ARHGAP4	P98171;E9PCM6;E7EQN5
28.2165	28.1956	28.3062	28.3016	28.3374	28.274	28.3577	28.4221	0.0680374	0.0968752	0.0928535	RECQL	P46063
26.0895	25.5089	25.7184	26.0449	26.0241	26.2399	26.1433	26.283	0.0681058	0.0968886	0.332096	NDUFA12	Q9UI09
20.8276	21.1073	20.0727	21.4705	21.4675	21.6615	21.4464	21.5746	0.0680013	0.0969432	0.667959	GPN1	Q9HCN4
22.7669	23.4721	23.2664	22.9766	22.3984	22.9152	22.7537	22.7331	0.0685733	0.0975507	-0.420423	TP53I3	Q53FA7
25.3685	25.4646	25.158	24.8624	25.4455	25.5524	25.4871	25.9912	0.0690147	0.0982138	0.405678	RBM15	A0A087WWP4;Q96T37
23.1613	23.4021	23.1565	23.1144	24.4208	24.7674	23.6346	23.2122	0.069023	0.0982458	0.800143	NDNL2	Q96MG7
24.8188	25.2041	25.0755	24.5771	25.6294	25.2301	25.3331	25.0829	0.0690884	0.098261	0.400012	PTPN23	Q9H3S7
27.1069	26.9943	27.0822	26.9115	27.048	27.2487	27.147	27.1971	0.0691462	0.0982762	0.136475	COPS4	Q9BT78;D6RFN0;D6RAX7;D6RD63
27.1227	27.5499	27.6664	27.496	27.2917	27.1863	27.1745	26.8696	0.0692176	0.0982801	-0.32821	APOBEC3G	Q9HC16
22.783	22.9324	23.249	23.5361	23.701	23.2802	23.637	23.5812	0.06898	0.0982825	0.42474	SCAF4	O95104
21.9061	22.303	22.1471	22.3343	22.2083	22.6162	22.4541	22.6733	0.0694184	0.0985766	0.315365	ANAPC4	Q9UJX5;D6RAP6
21.3901	21.7849	21.8697	21.2212	23.8537	23.1253	22.0578	21.7393	0.0695926	0.0989506	1.12754	INPP1	P49441
27.4485	27.7007	27.6835	27.6909	27.7964	27.7438	27.7995	27.739	0.0699704	0.0993412	0.138797	NUP155	E9PF10;O75694
28.9891	28.5434	28.7512	28.9337	28.6278	28.609	28.5076	28.554	0.0699598	0.0993741	-0.22977	DBNL	Q9UJU6;B4DDD6;H0Y5J4
24.1322	24.6592	25.0456	25.2636	25.7191	25.7029	25.1264	25.1644	0.0703048	0.0997889	0.65304	RRP9	O43818
22.3079	22.6319	22.3104	21.7189	22.9351	22.7973	22.4232	23.6988	0.0705741	0.1005	0.721305	RNMTL1	Q9HC36;I3L443
28.042	28.1152	28.136	27.9014	28.0978	28.2839	28.1652	28.4107	0.0706364	0.100577	0.190749	OXCT1	P55809;E9PDW2
28.9414	27.7076	27.7277	28.1932	27.4751	27.7826	27.4118	26.9999	0.0708826	0.100937	-0.725094	FCER2	K3W4U1;P06734
22.8648	19.7585	21.9718	22.1734	23.0809	23.2305	22.8674	23.646	0.0713109	0.101383	1.51408	STXBP3	O00186
24.0062	23.8265	24.1674	23.9858	24.1562	24.0624	24.2361	24.3836	0.0712703	0.101393	0.213094	IFT27	Q9BW83;B1AH58;F5GZ09
26.0442	25.9751	25.6414	25.6006	25.0754	25.4759	25.675	25.5347	0.0713084	0.101453	-0.375067	AP2S1	M0QYZ2;M0R0N4;P53680;X6R390
25.4337	25.7658	25.7347	26.2127	25.8984	26.2927	26.2351	26.5706	0.0716153	0.101818	0.462438	ZC3H15	Q8WU90
26.159	26.9589	26.6894	26.5048	27.0159	26.8498	26.8742	27.3374	0.0715496	0.101888	0.441306	STRBP	Q96SI9
24.9355	26.081	25.7372	26.1387	26.557	26.3653	26.1665	26.3213	0.0718999	0.102228	0.629434	CD53	P19397
25.2021	25.1691	24.8899	24.8466	24.2924	24.7297	23.8509	24.9554	0.0719844	0.102279	-0.569844	NDUFB6	O95139;A0A087WZX2
24.0395	24.0124	23.9781	23.9456	24.3855	24.082	24.1166	24.0678	0.0722363	0.102279	0.169059	AARS2	Q5JTZ9
26.2906	26.6602	26.3544	26.1941	26.0279	26.2988	26.0143	26.1114	0.0721616	0.102314	-0.261713	AP3M1	Q9Y2T2
25.6336	26.1473	25.9828	25.8758	25.4475	25.8377	25.6551	25.4687	0.0721291	0.102385	-0.307639	ACAP1	Q15027
23.3777	24.2159	24.1215	24.0082	24.3869	24.3254	24.3741	24.2938	0.0725428	0.102768	0.414207	QKI	Q96PU8;F5GXS8;F5GYM3;H0YGD6;H0YG47
26.0899	25.7477	26.0636	26.0368	26.1179	26.2453	26.0966	26.2687	0.0726416	0.103032	0.197611	ANKRD44	Q8N8A2;H7C209
24.481	24.6976	24.2567	24.5878	25.1421	24.8306	24.5605	24.8095	0.0727277	0.103192	0.329887	USP39	A0A087X1B2;Q53GS9;B9A018
22.2955	21.8602	21.8652	22.0482	22.0092	22.5289	22.5482	22.3872	0.0729147	0.103338	0.351082	HINT3	Q9NQE9
24.8305	25.943	25.5337	25.7741	26.2157	25.9815	25.8472	26.4805	0.0730844	0.103462	0.610886	PAPSS1	O43252
24.3897	24.9596	24.6564	24.9036	24.859	25.1332	25.0495	25.5181	0.0731139	0.103463	0.412648	RIC8A	Q9NPQ8;E9PSI0;H0YEN0
27.2299	27.3383	27.501	27.3544	27.2456	27.0357	26.7362	27.25	0.0731203	0.103471	-0.289049	DDX21	Q9NR30
19.8558	21.5109	21.794	21.112	22.881	21.6986	21.6087	23.2126	0.0732121	0.103524	1.28208	GNB1L	Q9BYB4;C9JPQ6
28.4493	28.7408	28.8228	28.7766	28.9142	28.9754	28.8178	28.8688	0.0734706	0.103532	0.196672	RBMX	P38159;H3BT71;H0Y6E7;H3BUY5
19.5148	22.8611	20.3888	21.5588	23.8469	22.3758	22.5078	22.5559	0.0734416	0.103603	1.74069	COPS7A	F5H4U8;F5H7C6;F5GYF7;F5H248;Q9UBW8
26.5535	27.0249	26.8143	26.7477	26.9333	26.9705	27.0202	27.1945	0.0738202	0.104066	0.244519	USP10	Q14694
24.7522	25.2854	24.8545	25.4983	25.5597	25.2775	25.5997	25.6355	0.073964	0.104328	0.420496	SAMD9	Q5K651;C9JKF1
25.4954	24.5409	24.232	24.7346	25.3038	25.3091	25.2014	25.6969	0.0740499	0.104513	0.627072	NARS2	Q96I59
25.3301	26.248	25.729	25.5895	26.269	26.026	26.1264	26.2025	0.0743101	0.104728	0.431818	C12orf10	Q9HB07;F8VR84;F8VQQ3
22.9586	22.3727	24.0271	24.2485	25.0987	24.2439	24.3539	24.1629	0.0744704	0.104841	1.06315	ABHD11	Q8NFV4
23.4998	24.309	24.3094	23.9709	24.5978	24.3218	24.3492	24.5975	0.0744417	0.104869	0.444277	FTO	A0A1B0GUC3;A0A1B0GV98;A0A1B0GTC5;A0A1B0GU26;A0A1B0GTC3;A0A1B0GVH5;Q9C0B1;A0A1B0GTI3;A0A1B0GTY1;A0A1B0GUY7
20.8549	21.8224	21.6095	22.1533	22.1625	22.344	22.1342	22.2095	0.0743929	0.104896	0.602528	SNTB2	Q13425;A0A140TA73
27.154	27.3716	27.4357	27.2993	27.3732	27.4349	27.5474	27.5439	0.0745934	0.104922	0.159692	SRP72	O76094
27.3583	26.5083	26.7108	26.6986	27.2553	27.0635	27.2374	27.476	0.0748557	0.105283	0.439065	RBM8A	Q9Y5S9;A0A0J9YW13
25.0703	25.7081	26.1588	25.5977	25.4319	24.9149	25.0563	24.2108	0.0749421	0.105355	-0.730288	EIF1;EIF1B	K7EM18;P41567;O60739
21.8804	23.9428	23.052	22.5112	23.8171	23.7969	23.8595	23.6843	0.0750549	0.105498	0.942846	UBE4A	Q14139;B7Z7P0
25.1441	24.5534	24.4058	24.5184	24.7361	23.7322	23.9419	23.561	0.0750961	0.105586	-0.662603	TRIM27	P14373;A0A140T9B9;A0A140T9N6;A0A140T9V9;H0Y551;A0A0G2JIZ4
25.8883	25.75	25.8669	25.5767	25.76	25.3801	25.5096	25.5161	0.0754257	0.105974	-0.229037	NIT1	Q86X76
23.8456	24.7403	24.2694	24.5672	24.8403	24.6193	24.9192	24.8127	0.0753823	0.105984	0.442236	ELP3	Q9H9T3;B4DKA4
24.9872	25.4478	25.5092	24.9074	24.6482	23.2872	24.4679	24.9977	0.0755211	0.106092	-0.862686	CTSD	A0A1B0GW44;A0A1B0GV23;A0A1B0GVD5;A0A1B0GWE8;P07339;A0A1B0GVP3;A0A1B0GU92;A0A1B0GU03;H7C469;H7C1V0;F8W787;F8WD96;C9JH19
27.2064	27.7203	27.4871	27.313	27.6876	27.7089	27.5782	27.7797	0.075655	0.106442	0.25687	PRPS2	P11908
23.7101	23.4751	23.8505	23.3867	23.1135	22.12	23.5164	22.9914	0.0757627	0.106532	-0.670263	TBC1D1	Q86TI0;H0Y8P0;C9JIE2
29.0438	28.9911	29.4111	29.3199	28.9849	29.0407	28.9139	28.5844	0.0758777	0.106714	-0.310525	ARHGDIA	P52565;J3KTF8;J3QQX2;J3KRE2
24.8967	25.2429	24.9901	25.1827	25.5005	25.4386	25.4612	25.049	0.0760731	0.106717	0.284266	RBM26	A0A087X0H9;Q5T8P6
34.0261	34.2536	34.1682	34.0468	34.4353	34.217	34.2072	34.2785	0.0759145	0.106723	0.160833	GAPDH	P04406;E7EUT5
31.9885	31.6991	31.8351	31.8438	31.8862	32.005	32.0529	32.0151	0.0760663	0.106789	0.14822	HNRNPA2B1	P22626;A0A087WUI2
23.4799	23.7712	23.5404	23.0201	22.9688	23.0781	23.2887	22.992	0.0761413	0.10684	-0.371014	MFAP1	P55081
22.8533	23.4171	23.641	23.1386	23.4843	23.4895	24.1111	24.0073	0.0761271	0.106885	0.510544	SMARCAD1	Q9H4L7
22.0838	20.0088	21.9008	21.4473	19.6031	20.8206	20.4214	19.9872	0.0763742	0.107161	-1.15213	LEMD3	Q9Y2U8
24.8972	25.1076	24.6954	24.0833	23.8274	24.6206	24.0605	23.7376	0.0765083	0.107232	-0.634347	MRPS27	Q92552;D6RH20;G5EA06;D6RJC7
26.4243	26.1576	26.4343	26.5153	25.9312	26.2735	26.2921	25.843	0.0764981	0.107277	-0.297923	GNAI3	P08754
26.259	25.6547	25.5443	25.8566	25.9836	26.3315	26.265	26.2272	0.0765692	0.107313	0.373135	CDC5L	Q99459
28.9047	29.2352	29.0931	29.0981	29.2614	29.1616	29.2274	29.3487	0.0767409	0.107369	0.167014	GCN1L1	Q92616
24.1388	24.3483	24.4528	24.5857	24.854	24.6922	24.6102	24.4495	0.0766299	0.107383	0.270084	POLR1A	B9ZVN9;O95602
26.5219	25.0657	25.6092	25.8222	25.4391	24.8829	24.5328	25.1167	0.0766152	0.107386	-0.761873	CCDC50	Q8IVM0
29.0769	29.4077	29.3547	29.5909	29.7372	29.536	29.4848	29.7528	0.0766953	0.107422	0.270146	IFI16	Q16666
27.4354	27.8054	27.7042	27.7457	27.3583	27.5831	27.4478	27.4963	0.0766916	0.107494	-0.201272	PRDX4	Q13162;H7C3T4
25.2831	25.7291	25.1501	25.0573	26.0549	25.4076	25.7265	25.7272	0.0770543	0.10796	0.424162	NDUFAF2	Q8N183
26.0165	26.4661	26.2295	26.5111	25.9587	25.6531	25.9423	26.2473	0.0771644	0.108152	-0.355438	STIM1	Q13586;G0XQ39;E9PNJ4;H0YDB2
21.5144	23.0695	22.3001	22.2663	23.6219	22.3483	23.6287	23.2833	0.0772154	0.108216	0.932961	PMF1-BGLAP;PMF1	U3KQ54;Q6P1K2;A0A087WT04
23.9193	24.8144	24.3717	24.1973	23.9487	23.8427	23.8742	24.0086	0.0774314	0.108421	-0.407147	HTATIP2	Q9BUP3;E9PI87
24.484	24.7957	24.7032	23.8199	24.9899	24.925	24.7793	25.0466	0.0773432	0.108467	0.484504	CUL5	Q93034
29.5982	29.7722	29.33	29.4871	29.8297	29.5947	29.8302	30.0328	0.0774306	0.108493	0.274909	PSMA3	P25788
25.9607	25.8502	25.5171	25.1593	24.5423	25.448	25.3336	24.7277	0.0779033	0.109147	-0.608971	MRPS15	P82914
27.3492	27.4597	27.3211	27.2892	27.3181	26.8963	27.275	26.8982	0.077803	0.109172	-0.257903	CPT2	P23786;A0A1B0GV75;A0A1B0GVF3;A0A1B0GTB8;A0A1B0GWC0
22.818	23.1996	23.52	24.009	23.9289	24.0599	23.8863	23.849	0.0779279	0.109237	0.544362	EXOSC1	B1AMU3;Q9Y3B2;R4GNH9;R4GMQ7;B1AMU7;B1AMU4
27.7048	27.0718	27.1598	27.0352	26.5931	27.1043	26.7964	26.8781	0.0782037	0.10952	-0.399949	FKBP1A;FKBP12-Exip2	P62942;Q5W0X3;Q1JUQ5;A0A087WZM5
24.6095	24.262	24.5237	24.8258	24.3578	24.3932	23.1739	23.0804	0.0783479	0.109724	-0.803903		H3BN98
23.624	24.6165	24.7945	24.3452	23.7752	24.0664	23.6208	22.9356	0.0784175	0.109802	-0.74552	SPPL2A	Q8TCT8;H0YNA7;H0YNA2
27.5492	26.7157	26.0254	26.7768	26.2949	26.3583	25.7327	25.3364	0.0786204	0.110095	-0.836205	TSN	E9PGT1;Q15631;H7C1D4
27.8986	27.6883	28.0426	27.8301	27.9507	28.0088	28.0833	28.1131	0.0787949	0.110343	0.174096	GSR	P00390
22.5445	22.9141	22.5253	22.4913	23.0345	22.9922	22.7835	23.8871	0.0792824	0.110975	0.555527	PLEKHF1	K7ELB8;Q96S99;K7EIX0
25.5247	25.0535	25.054	24.7736	25.532	25.2834	25.6055	25.4256	0.0794542	0.111084	0.360161	BDH1	Q02338;E9PCG9;C9K0G7;H7C2W1
22.4992	21.1352	21.8895	20.7105	23.4757	22.2298	22.596	22.1485	0.0796106	0.111378	1.05388	GRK6	D6RHX8;F8W9W2;P43250;D6RHC7
22.9215	23.3717	23.9077	23.5224	23.6637	24.2522	23.7995	24.0461	0.0799745	0.111678	0.509554	HDHD3	Q9BSH5
25.065	25.0246	25.6289	25.3786	25.5445	25.523	25.6395	25.6093	0.0799385	0.111681	0.30483	POLR2E	A0A087WVZ9;P19388;A0A087WWX0;A0A0A0MQR7
29.9942	30.0914	30.2316	30.2151	30.0061	30.062	29.9854	29.9837	0.0799096	0.111728	-0.123771	CLIC1	O00299
26.4175	25.802	25.9799	26.3617	26.4709	26.2949	26.5287	26.7424	0.0797872	0.111736	0.368945	NDUFS8	E9PPW7;O00217;E9PKH6;E9PN51;F8W9K7
27.2569	27.9109	27.6539	27.7611	27.9726	27.9371	27.8471	28.0605	0.0800583	0.111755	0.30863	SMARCC1	Q92922
27.9077	28.1831	28.1492	28.0672	28.169	28.1871	28.2218	28.3455	0.0798328	0.111765	0.154048	ALDH18A1	P54886
24.969	25.743	25.249	25.3987	26.1677	25.7759	26.0053	25.382	0.0803483	0.112205	0.49279	SAR1A	Q9NR31;H0Y5E8
22.7826	23.768	23.8846	23.4712	23.7832	23.9801	24.1078	24.3142	0.080331	0.112279	0.569724	ANAPC5	F5H0F9;Q9UJX4;F5GY68;H0YFB5
24.0565	24.4313	24.0514	24.2992	24.4921	24.2633	24.4711	24.583	0.0804347	0.112284	0.242794	DDX50	A0A087WVC1;Q9BQ39
26.2596	25.7892	25.5197	25.7227	25.2573	24.9475	24.9942	25.8727	0.0804167	0.112339	-0.554872	UFM1	P61960;H0Y614
27.0765	26.7893	26.8528	27.0178	26.1502	26.9188	26.7193	25.9626	0.0810985	0.113156	-0.496366	CHCHD3	C9JRZ6;Q9NX63;F8WAR4
28.7561	29.2239	29.1696	29.0664	28.7131	28.841	28.7893	28.9233	0.0814718	0.113627	-0.237323	SEC31A	D6REX3;O94979;H7BXG7;D6RHZ5
22.6928	23.7402	23.6091	23.6122	23.6633	24.0882	23.9202	24.6062	0.0813567	0.113639	0.655922	SMYD3	Q9H7B4;B0QZ88
24.3779	24.8698	25.3316	25.2301	25.643	25.7272	25.08	25.5291	0.0813808	0.113644	0.542485	POLD2	P49005;F8W8R3;A0A087WWF6;C9IZD2;C9J8Z7;C9JLE1
22.5366	23.9878	23.7865	24.0119	24.1548	24.6218	24.0417	24.8627	0.0814655	0.113702	0.839558	PAAF1	F5H0C4;Q9BRP4;F5H5D4;F5H103;F5H3I1
28.4345	28.1407	28.6184	28.5796	28.6684	28.7652	28.6129	28.6713	0.0813222	0.113714	0.236147	SF3B2	Q13435;E9PPJ0
26.4971	27.3626	26.9564	27.2946	26.4905	26.7853	26.5983	26.477	0.0814345	0.113739	-0.43988	LETM1	O95202
21.71	21.5536	22.7011	22.7184	22.1593	23.8527	24.0849	23.0661	0.0817928	0.113961	1.11996	PMS2	P54278;C9J167
26.8112	26.883	26.9555	26.4208	26.3842	26.4465	26.4787	26.6539	0.081843	0.11402	-0.276779	CTSS	P25774;U3KPS4;U3KQE7
20.3206	22.6904	23.3162	23.5072	23.8084	24.1674	23.9164	24.1054	0.0819724	0.114243	1.54081	NAA20	P61599;A8MZB2
23.9862	23.6502	24.3029	23.5771	23.5087	23.5736	23.3795	22.4371	0.0820885	0.114528	-0.654365	INTS1	Q8N201
25.9459	26.0456	26.0214	25.7312	25.5333	25.4549	25.1757	26.0129	0.0825049	0.115223	-0.391794	PGM2	Q96G03
25.7186	25.9764	25.6524	25.866	26.1862	25.7578	26.1246	26.3552	0.0826997	0.11551	0.302636	DDX42	A0A0A0MSJ0;Q86XP3
24.1745	22.9545	23.5851	22.9058	24.3271	23.9836	23.7499	24.3012	0.0828512	0.115625	0.685511	EXOSC6	Q5RKV6
30.5573	30.1708	30.1381	30.1028	29.701	29.9898	29.9764	30.1388	0.0828146	0.115641	-0.290734	RPS15A	P62244;I3L3P7;I3L246
24.2182	24.2429	24.0919	23.6127	23.3226	23.7715	23.838	23.6855	0.0830884	0.115982	-0.386991	NMD3	C9JA08;Q96D46
27.0637	26.1382	26.3314	26.3815	26.8875	26.9855	26.9762	26.7856	0.0833379	0.116187	0.429995	GCA	H7C2Z6;H7BXD5;P28676
26.54	26.3453	26.5381	26.3154	26.8535	26.8661	26.6123	26.422	0.083327	0.116223	0.253829	TIMM10	P62072
25.1073	25.5103	25.446	25.5053	24.3251	25.0125	25.0172	25.3078	0.0832987	0.116299	-0.476599	DCAF8	G3V3G9;Q5TAQ9;V9GY54
26.715	26.5171	26.4549	26.6698	26.5721	26.4467	26.0233	26.0069	0.0832967	0.116374	-0.326946	TMPO	P42167;G5E972;H0YJH7
23.6586	23.3679	24.4232	23.9112	24.3216	24.2961	24.1412	24.7744	0.0835949	0.116601	0.543098	CTR9	Q6PD62
23.8715	24.6281	24.0131	24.1744	24.4261	24.5577	24.4757	24.6431	0.0839021	0.117256	0.353884	IMPDH1	P20839;C9J381;C9K0R9
27.2494	27.8846	28.056	27.8157	27.5333	27.415	27.2397	27.2625	0.0839573	0.117326	-0.388827	PSAP	P07602;C9JIZ6;Q5BJH1
23.6709	23.5734	23.6396	23.0915	23.6239	24.1532	23.9088	23.7537	0.0841982	0.117633	0.366046	MAPK3	P27361;E9PQW4;E9PJF0;E9PBK7;B3KR49
[truncated: 2,488 more rows]
