# Supplementary material for: Multi-omics profiling identifies a deregulated FUS-MAP1B axis in ALS/FTD–associated UBQLN2 mutants
Source: Life Sci Alliance. 2022 Jul 1;5(11):e202101327. doi: 10.26508/lsa.202101327 (PMC9258132; doi:10.26508/lsa.202101327)
Supplement: Supplementary file 2 [file LSA-2021-01327_TableS2.xlsx]

## Sheet: HeLa_P497S
LFQ intensity Hela1	LFQ intensity Hela2	LFQ intensity Hela3	LFQ intensity Hela4	LFQ intensity P497S_1	LFQ intensity P497S_2	LFQ intensity P497S_3	LFQ intensity P497S_4	p-value	q-value	Log2FC	Gene names
24.1272	23.983	24.1994	24.1572	26.0407	25.5209	25.9858	25.6699	1.49674e-05	0	1.68767	CRIP2
30.0655	30.0913	30.0775	29.9878	28.7644	28.938	28.9508	28.8411	3.58941e-07	0	-1.18197	HSD17B4
25.3682	25.4428	25.5363	25.6241	26.9285	27.1525	27.1906	26.9608	1.83794e-06	0	1.56524	L1CAM
28.592	28.7682	28.6913	28.8647	29.675	29.8212	29.7561	29.6546	7.09855e-06	0	0.997688	MCM4
28.0117	28.2115	28.2466	28.2455	29.0552	29.0756	29.1627	29.0246	7.7706e-06	0	0.900701	MCM7
26.897	27.0449	27.0848	27.0473	28.0658	27.8516	27.8711	27.8481	1.11016e-05	0	0.890663	NAMPT
23.4855	23.2928	23.1643	23.343	25.3619	25.4441	25.8446	25.4774	2.19259e-06	0	2.21056	PTBP2
24.398	24.5392	24.2151	23.8216	20.6539	19.6583	20.7731	20.6455	1.5395e-05	0	-3.81077	SYNGR2
28.7001	28.6224	28.5306	28.6351	30.0697	29.8792	29.5814	29.6287	6.49546e-05	0.00224	1.16772	CDC2;CDK1
26.2298	26.1161	26.2754	26.0694	27.4753	27.0998	27.3965	27.0927	6.10817e-05	0.00233333	1.0934	EIF2B2
33.485	33.4915	33.6437	33.4832	34.08	34.2199	34.1864	34.0253	5.70288e-05	0.00243478	0.602065	PLEC
24.5549	24.7863	25.162	24.9762	26.5702	26.2707	26.3721	26.2578	5.55863e-05	0.00254545	1.49783	KIF11
24.0706	24.7357	25.0754	24.4378	27.0818	26.9437	26.7102	26.907	5.01956e-05	0.00266667	2.33079	AGR2
24.8276	24.5017	24.9347	26.2192	20.5574	20.7286	21.0961	20.0281	4.84842e-05	0.0028	-4.51824	DNAJA4
26.5935	26.3939	26.2363	26.4875	24.3753	23.3569	23.4953	24.0741	4.81059e-05	0.00294737	-2.60237	NSDHL
27.2604	27.1693	26.968	27.1471	26.3583	26.3605	26.4317	26.5	4.75264e-05	0.00311111	-0.723553	NDUFB3
24.1222	24.0799	23.9106	23.8402	22.8973	23.0215	22.6539	22.657	4.60409e-05	0.00329412	-1.18083	ADARB1
27.731	27.6889	27.6127	27.3521	28.6281	28.7701	28.6646	28.5249	4.09447e-05	0.0035	1.05071	IQGAP2
22.0404	22.2201	22.5222	22.4129	24.6748	24.0978	24.6855	25.0045	3.95418e-05	0.00373333	2.31675	CKS2
28.0896	28.0598	28.4282	28.2944	29.3017	29.0623	29.3729	29.2051	9.11197e-05	0.004	1.01749	MAT2A
24.3631	25.0817	24.563	24.2859	21.165	21.8399	20.9299	21.8266	3.95122e-05	0.004	-3.13309	PLD1
29.3902	29.2613	29.4296	29.6294	30.316	30.4043	30.2299	30.1683	8.94725e-05	0.00414815	0.851956	PSMA7
27.4851	27.4105	27.5353	27.6757	23.9497	23.1709	23.8241	24.7849	3.95108e-05	0.00430769	-3.59427	ALPI
24.3919	24.2058	23.6026	23.6974	19.716	19.6559	19.5561	21.1552	8.78092e-05	0.00430769	-3.95364	GLT8D1
30.2594	30.4759	30.4323	30.3827	31.1578	31.3878	31.2957	31.1066	3.94792e-05	0.00466667	0.849439	SERPINH1
24.8403	25.1793	25.5231	25.2031	23.2614	23.198	22.7192	23.2489	3.51974e-05	0.00509091	-2.07957	CCBL1
24.9898	24.7156	25.0164	25.1326	26.201	26.2791	26.1625	25.99	3.14122e-05	0.0056	1.19455	RBM5
28.4361	28.4086	28.4338	28.3473	29.3949	29.2978	29.1629	29.0746	3.0579e-05	0.00622222	0.826104	SMC2
24.4014	24.2373	24.4389	24.5864	26.4237	25.83	26.057	25.6526	0.000127875	0.007625	1.57482	CDK6
24.769	24.6333	24.6464	24.3527	23.719	23.8552	23.7581	23.6796	0.00011569	0.00787097	-0.847363	OCRL
25.7871	26.0944	26.0815	26.3808	27.4929	27.4623	27.1932	27.2502	0.000114786	0.00813333	1.26368	SMEK1
28.296	28.1911	27.9387	28.1392	28.9179	28.9485	28.7485	28.8722	0.00015469	0.00832432	0.730512	DNMT1
26.9388	26.62	26.0184	25.814	23.4313	23.7786	23.9344	23.8658	9.62071e-05	0.00841379	-2.59528	SOAT1
28.1696	28.2135	28.0944	28.2327	29.0452	28.8835	28.6788	28.9629	0.000147255	0.00855556	0.715029	PSMD4
23.9105	23.8983	24.099	23.7765	24.9895	24.8235	25.0376	24.6494	0.000132548	0.0088	0.953946	TRIM33
29.167	29.1909	29.4328	29.1587	28.5783	28.5247	28.4126	28.2957	0.000131696	0.00905882	-0.784534	ADAR
25.9102	25.9647	26.165	25.9263	26.7148	26.5553	26.7257	26.4971	0.000254457	0.00909091	0.63168	ARPC3
20.5525	20.624	19.9125	19.9682	22.7082	22.465	21.9808	21.9779	0.000249235	0.00925926	2.01864	SPECC1L;SPECC1L-ADORA2A
28.9959	28.9939	29.246	29.484	30.813	30.4849	30.5519	30.3087	0.000131549	0.00933333	1.35967	VCL
23.6811	23.4589	24.5326	23.7992	20.1826	21.5972	21.168	20.8691	0.000248185	0.00943396	-2.91369	LDLR
27.1535	27.9358	27.9108	27.306	25.883	26.043	25.7482	26.0105	0.000242121	0.00961538	-1.65539	SLC16A3
26.0313	24.7581	25.3918	24.6908	22.4498	21.9397	21.4521	22.5017	0.000225686	0.00963265	-3.13216	SQRDL
23.8155	23.6104	23.461	23.7857	24.6903	24.841	24.9966	24.4606	0.000258661	0.00975439	1.07898	KNSTRN
27.193	26.7832	27.1788	27.4246	28.7253	28.3154	28.5456	28.2728	0.000238808	0.00980392	1.31988	UBA2
29.6754	30.0628	30.3456	30.1402	31.4639	31.2611	31.7871	31.3758	0.000223667	0.00983333	1.41597	ANXA1
28.3004	28.4082	28.4565	28.4436	28.0804	28.0248	27.9083	28.0324	0.000255323	0.00992857	-0.390729	NOMO3;NOMO2;NOMO1
27.8185	27.9347	28.0181	28.301	28.8428	28.9395	29.1775	29.0114	0.000231602	0.01	0.974701	MCM6
28.8701	28.8852	28.8257	28.7212	30.0275	29.6808	29.9096	29.5101	0.000222438	0.0100426	0.956434	DNAJA1
26.1542	25.8147	25.631	26.144	24.3297	23.5498	23.9259	24.4087	0.000209165	0.0102609	-1.88244	YTHDC2
24.4286	24.318	24.6643	24.4536	25.6144	25.253	25.7692	25.3735	0.000277443	0.0102667	1.03637	BAIAP2
29.0036	29.1972	29.4781	29.3297	28.3552	28.4981	28.338	28.4891	0.000269366	0.0104407	-0.832016	PDCD6
33.5002	33.4485	33.4993	33.4848	34.019	34.086	34.0312	33.8048	0.000208891	0.0104889	0.502036	EEF1A1P5;EEF1A1
30.39	30.6964	30.8343	30.4138	29.4325	29.6126	29.625	29.7597	0.000262959	0.0106207	-0.976163	SFXN1
26.25	26.2309	26.341	26.3063	27.0034	27.345	27.203	26.8939	0.000206691	0.0107273	0.829247	UBR5
28.1216	28.0386	28.3392	28.4472	29.1551	29.0572	29.2129	28.9753	0.000206284	0.0109767	0.86346	PSMB1
32.342	32.4007	32.2743	32.4416	31.6024	31.7791	31.3358	31.4817	0.000190795	0.0112381	-0.814908	VDAC1
20.6495	21.7306	21.1718	21.8287	24.3805	24.2138	23.5585	24.3811	0.000166288	0.0113684	2.78834	METTL7B
28.3861	28.6597	28.7019	28.6442	29.3627	29.4926	29.3274	29.2098	0.000186627	0.0115122	0.750158	MCM5
24.7578	25.1867	25.156	24.2512	23.0078	22.5595	22.5415	22.9837	0.000184815	0.0118	-2.0648	DHRS7
25.0267	25.4726	25.6306	25.4354	23.6852	24.1792	23.0954	23.6496	0.000500321	0.012	-1.73899	MB21D1
27.8057	27.8017	27.5737	27.7052	28.382	28.2094	28.4427	28.2923	0.000181766	0.0121026	0.610004	SEPT2
25.3286	25.6606	24.8281	25.1764	24.1112	24.0114	24.0399	23.8026	0.000498086	0.0121446	-1.25715	NME3
22.8675	22.5354	22.2739	23.9089	25.6965	25.7603	25.3382	25.2135	0.000492602	0.0122927	2.60568	BROX
28.2517	28.2548	28.6427	28.433	27.158	27.1943	27.1741	27.6369	0.000299905	0.0123175	-1.10473	BRIX1
28.8011	28.3503	28.3605	28.5186	29.4373	29.5045	29.3253	29.1944	0.000475301	0.0124444	0.857721	EIF3F
25.0507	25.2151	25.1036	25.5814	26.2799	26.3969	26.8283	26.4822	0.000291715	0.0125161	1.25914	IRF2BP2
25.8745	26.6284	25.7942	27.2085	23.7101	23.1096	21.9017	23.4521	0.000692179	0.0125766	-3.33301	RCN3
25.668	25.6061	25.5708	25.5821	25.1671	24.6985	24.8451	24.9902	0.000560603	0.0125778	-0.681515	ILVBL
31.7038	31.5556	31.914	31.9466	32.7676	32.585	32.4628	32.4796	0.000473165	0.0126	0.793753	HSPA1B;HSPA1A
29.1053	29.3403	29.6627	29.4356	30.5007	30.2919	30.2828	30.0979	0.000685954	0.0126909	0.907319	PSAT1
23.4152	22.8841	23.2807	22.9563	22.0057	21.5481	22.0746	21.3425	0.000701355	0.0127143	-1.39134	PITPNM1
28.7043	28.6671	29.0576	28.6813	30.1921	29.9283	30.3215	29.5991	0.000553959	0.0127191	1.2327	HSPH1
27.8581	27.8286	27.8411	27.5957	28.2611	28.3796	28.3129	28.2444	0.000288995	0.0127213	0.518643	ALDH9A1
23.921	24.4533	23.7495	23.4745	25.3232	26.1388	25.9923	26.2929	0.000471544	0.0127595	2.03724	MAP1B
28.7159	28.8433	28.7653	28.611	28.2134	28.1851	27.8947	28.0835	0.000323189	0.0128	-0.63973	AP2A1
26.7754	26.8102	26.7313	26.8583	27.0597	27.227	27.3223	27.1535	0.000674351	0.0128073	0.396858	SLC38A1
24.3535	24.5437	24.3637	24.1195	24.919	25.008	24.9073	25.0377	0.000530573	0.0128636	0.622918	C7orf55
27.075	26.7851	26.72	26.9249	27.9177	27.9089	28.2003	27.5822	0.000461711	0.0129231	1.02602	OGT
28.9142	28.8867	29.2245	29.1942	30.3296	29.9464	29.77	29.9702	0.0006685	0.0129259	0.949181	PSMA3
25.7077	25.9348	26.1369	26.3362	27.0768	26.9565	27.1718	27.112	0.000316503	0.013	1.05038	RBM12
26.1007	25.6253	25.9731	25.9356	25.1032	25.1374	25.2971	25.1542	0.000529413	0.0130115	-0.735673	HELLS
24.3695	25.0481	24.857	25.1361	23.5028	23.5709	23.1639	23.7489	0.000662906	0.0130467	-1.35605	COL7A1
28.9512	28.9464	28.9999	29.2306	29.9839	29.7508	29.9703	29.6208	0.000361774	0.0130588	0.79944	PSMC2
25.132	25.2493	25.3696	25.1589	24.402	24.1574	24.4151	23.8243	0.000449614	0.0130909	-1.02774	EML2
26.6999	26.6873	26.8055	26.9438	28.1882	27.7879	27.6769	27.5483	0.000514291	0.0131628	1.0162	PITPNB
28.3322	28.0031	28.4127	28.4884	29.3281	28.9963	29.1649	29.0697	0.000654103	0.0131698	0.830647	MSH2
24.2884	24.2762	24.5092	24.1432	25.0151	25.1069	25.2105	24.8675	0.000393036	0.0132222	0.745747	RBPJ
29.0381	28.9905	28.7466	29.6201	31.0933	30.6542	30.7814	30.4565	0.000358537	0.0132537	1.64751	CACYBP
27.1821	27.051	27.0612	27.4642	28.5386	28.2003	28.5651	28.0165	0.000447323	0.0132632	1.14052	TXNDC17
26.4613	26.2734	26.182	26.93	28.4079	27.7893	28.3711	27.718	0.000641322	0.0132952	1.60989	SAE1
30.2022	30.3468	30.1244	30.0329	29.6852	29.5477	29.3429	29.5144	0.000513119	0.0133176	-0.654005	MYOF
24.6228	24.9518	25.1973	24.2955	22.9286	23.0745	23.1809	23.4598	0.000391513	0.0134085	-1.60593	MRPS36
24.438	24.8756	24.1854	24.061	22.0883	23.0008	22.2447	22.8286	0.000637652	0.0134231	-1.84943	FNDC3A
20.8722	21.0405	21.0672	21.8283	22.9068	22.5837	22.6076	22.6197	0.000617742	0.0134257	1.47736	TSEN54
26.874	26.0599	25.5933	26.4597	24.058	24.0485	24.2209	23.3613	0.0004371	0.01344	-2.32455	TAPBP
22.3101	22.3439	22.605	23.0313	23.9011	23.7938	23.8798	23.71	0.000349167	0.0134545	1.24861	USP11
28.1182	28.0444	28.1712	28.0213	26.9418	26.9412	27.5042	26.7949	0.000630796	0.0135534	-1.04326	DAB2
34.6643	34.6923	34.8189	34.9414	34.1593	34.2695	34.3633	34.3123	0.000615625	0.01356	-0.503124	KRT18
27.9254	27.9622	27.2201	28.2759	26.1795	26.0508	25.4318	25.5904	0.000390337	0.0136	-2.03277	FDFT1
23.3265	23.41	22.4098	23.2295	25.0789	24.9603	24.5153	24.7283	0.000595094	0.0136	1.72672	TATDN1
28.1956	28.1378	28.0663	27.9962	27.593	27.2355	27.281	27.5988	0.000760711	0.0136207	-0.671886	SMU1
24.799	24.7999	23.8046	24.1837	22.7213	22.6082	22.2055	22.5076	0.000418393	0.0136216	-1.88613	RAB27A
23.75	22.6861	22.8927	22.7272	25.1089	25.2264	24.6324	25.6831	0.000623441	0.0136863	2.14868	NKAP
29.2558	29.2364	29.402	29.5831	28.5347	28.7743	28.6759	28.8209	0.000613582	0.013697	-0.667864	NUP155
30.1433	30.2241	30.2499	30.7552	31.2343	31.3665	31.4647	31.1746	0.000753387	0.0137391	0.966868	FUBP1
31.7569	31.7561	31.7998	31.891	31.3854	31.4252	31.1194	31.2235	0.000594595	0.0137447	-0.512582	PHB2
28.238	28.5702	28.5868	28.3884	29.2665	29.1589	29.1011	28.9376	0.00078324	0.0137479	0.670172	SMC4
26.1704	26.4808	26.4634	26.2275	25.4549	25.4717	25.5021	25.7758	0.000380117	0.0137971	-0.784409	CPD
19.9398	20.395	21.0007	21.6365	24.2889	24.4067	23.1822	24.1867	0.000405715	0.0138082	3.27312	PTPN23
24.4718	24.0429	25.0836	24.9222	22.6614	22.9641	22.8835	22.1221	0.000612859	0.0138367	-1.97236	CA2
22.6793	22.7785	22.6782	22.6764	24.2675	23.8984	23.4012	23.7852	0.000744693	0.0138596	1.13495	ERC1
24.4127	24.8525	24.4457	25.1011	23.1069	23.2326	22.0817	22.5126	0.000780775	0.0138644	-1.96955	LAMA5
25.901	26.5845	26.5936	26.3816	25.23	25.1526	24.7202	25.1292	0.000591773	0.0138925	-1.30718	APOL2
25.3266	25.6835	26.1058	25.4145	24.4966	24.0434	23.9572	24.3612	0.000611344	0.0139794	-1.41798	NADK2
26.0971	26.2198	25.9424	26.0688	27.0061	26.93	27.1815	26.601	0.000735716	0.0139823	0.84764	CDK2
25.9689	26.0134	26.0182	25.8429	25.3639	25.5626	25.6264	25.5483	0.000776081	0.0139829	-0.435558	CMC1
24.4743	24.4375	24.7412	24.6531	25.9221	25.7031	25.2572	25.5636	0.000583749	0.0140435	1.03497	UFD1L
29.2381	29.1612	29.342	29.5128	29.9997	29.9636	29.8364	29.7709	0.000794664	0.0141	0.579124	GNL3
24.9208	24.5347	26.0826	26.0562	28.1994	27.9519	27.8569	28.1356	0.000610144	0.014125	2.63739	PEG10
26.3292	26.3315	26.1426	26.5912	27.4187	27.1973	27.116	27.0106	0.000572807	0.0141978	0.837035	PPID
29.0708	29.4643	29.3573	29.5215	29.9755	29.999	29.9653	30.1188	0.000796506	0.0144793	0.661145	MCM3
29.9338	29.544	29.7513	29.7811	30.3428	30.3129	30.2928	30.1991	0.00080161	0.0148197	0.53429	GTF2I
28.0965	28.3357	28.339	28.1911	27.5734	27.5166	27.8631	27.5869	0.000804943	0.0156098	-0.605546	NDUFA8
23.2764	23.2805	24.1416	24.1175	25.5045	25.433	25.4187	24.9414	0.00111315	0.0167891	1.62039	HGH1
29.923	29.7727	29.9893	30.0922	30.4883	30.2939	30.5084	30.4368	0.00105117	0.0168	0.487576	PUF60
26.5111	26.8035	27.0674	26.8923	28.0026	27.7088	28.1839	27.5999	0.00100591	0.0168235	1.05522	CARM1
31.1817	31.4615	31.5035	31.5034	32.1838	32.0424	31.9149	31.8983	0.00109812	0.0169041	0.597347	MYH9
30.4452	30.6318	31.1169	30.9462	32.2366	31.6891	32.0557	31.7918	0.00104595	0.0169209	1.15829	EEF1D
23.5856	23.4588	23.8212	23.5408	22.9309	22.5605	22.1548	22.552	0.000999594	0.0169481	-1.05203	ALG2
28.547	28.6963	29.2135	29.3828	30.7556	30.3615	30.5238	30.1193	0.000858953	0.01696	1.48013	NASP
24.5153	24.2444	23.7281	24.7548	22.684	22.8925	23.024	23.079	0.00108946	0.0170207	-1.39076	ZFC3H1
24.8045	24.3743	25.2549	24.944	23.2683	23.8023	23.1037	23.5502	0.00104577	0.0170435	-1.41331	MRPL55
28.3309	28.3238	28.4809	28.6615	29.3771	29.1441	29.5798	29.0662	0.000986768	0.0170746	0.842525	PSMD13
23.8314	23.7056	22.9893	23.9456	24.8559	24.8486	24.9435	24.9363	0.00105492	0.017078	1.27813	THUMPD1
27.8422	27.8523	28.0212	27.937	29.0871	28.8127	28.7356	28.4401	0.000857447	0.0170968	0.855662	DNAJB1
31.504	31.5407	31.4001	31.6336	31.1438	31.2242	31.2343	31.0917	0.00108634	0.0171389	-0.346123	SUPT16H
24.798	24.5039	24.4418	24.66	23.6436	22.7461	22.5338	23.2455	0.00101676	0.0171679	-1.5587	SERPINB6
24.2953	23.9852	24.0766	24.2193	25.6177	25.889	25.1256	24.968	0.00139932	0.0171737	1.25599	NAPRT
23.8066	24.0202	24.1189	23.6488	23.001	22.701	22.5727	22.0824	0.000973097	0.017203	-1.30936	RBBP6
29.1277	29.0716	29.2519	29.3082	28.5856	28.8101	28.8063	28.7996	0.00128976	0.01725	-0.439472	PSIP1
30.9847	31.0847	31.0163	31.0411	30.8058	30.9092	30.8597	30.8251	0.00108538	0.0172587	-0.181734	SNRNP200
28.9848	29.0923	29.4968	29.2312	30.3049	29.9531	30.1445	29.825	0.00138802	0.0172771	0.855625	YARS
22.6145	22.4995	23.2069	23.5779	24.357	25.3398	25.3777	25.2432	0.000968078	0.0173333	2.10472	IL18
28.8504	28.98	29.0303	28.6942	27.7711	27.699	28.2008	28.2269	0.00116891	0.0173423	-0.91427	SLC25A24
25.8695	26.2918	26.4584	26.2511	25.281	25.5896	25.3761	25.186	0.00128928	0.0173585	-0.859488	GAA
27.5973	26.7859	26.696	27.3203	28.6028	28.6149	28.2279	28.4488	0.00107311	0.0173803	1.37373	TCEA1
28.0822	27.621	27.6558	27.4177	26.6521	26.4868	25.8058	26.5336	0.00138443	0.0173818	-1.3246	IFITM3
26.6224	26.9701	27.0478	27.076	27.6193	27.7194	27.9629	27.5697	0.00116783	0.0174595	0.788749	SUPT5H
28.9055	28.6018	28.6954	28.4883	28.0154	28.1916	27.9995	27.8937	0.000958692	0.0174656	-0.647714	RRBP1
32.4093	32.4845	32.7307	32.6363	32.1333	31.713	31.7202	31.6227	0.00128901	0.0174684	-0.767883	FASN
25.1983	24.8751	25.2869	25.1528	25.8866	25.7026	25.9665	25.6468	0.00118332	0.0174834	0.67238	CHD8
26.5509	26.4946	26.8739	26.9181	28.2565	27.6153	27.6489	27.6128	0.00137874	0.0174878	1.07405	CAPN2
31.699	31.9266	32.105	31.9521	32.7385	32.426	32.5469	32.4385	0.00141181	0.0175714	0.616855	RAN
27.6034	27.6973	27.3635	27.8803	28.603	28.4386	28.2644	28.2799	0.00127009	0.0175796	0.760384	PSMC1
30.9757	31.0225	31.2034	31.4308	31.9293	31.6834	31.9296	31.7776	0.00136798	0.0175951	0.671867	EEF1G
32.3403	32.4709	32.3634	32.4646	32.15	32.2039	32.0489	32.0466	0.00118204	0.0176	-0.29747	CLTC
26.5265	26.4257	26.866	26.7868	28.16	27.7679	27.4743	27.5953	0.000947868	0.0176	1.09813	DPYSL2
25.314	25.2669	25.8595	26.0746	27.2139	26.7178	27.1283	26.8066	0.00123889	0.0176923	1.3379	UCK2
23.0567	22.6938	23.4068	23.1414	20.8809	19.3225	20.8918	18.842	0.00135749	0.0177037	-3.09038	TXNIP
22.2506	22.1633	23.869	23.6884	19.093	20.3899	19.2163	19.8947	0.000877386	0.0177143	-3.34431	CPNE8;CPNE9;CPNE5
30.9026	30.9131	31.064	30.9456	31.2993	31.3767	31.2757	31.1834	0.000945668	0.0177364	0.327441	SF3B3
20.1083	20.8803	21.1163	22.3229	24.1595	23.5003	23.9431	23.7916	0.00123806	0.0178065	2.74173	PARVA
20.5936	20.7358	21.246	19.497	22.915	22.8195	24.2982	23.3333	0.00131756	0.0178137	2.82339	HSF1
27.9952	27.8374	28.3295	28.1797	28.7319	29.0668	29.2145	28.9299	0.000912646	0.017875	0.900313	MSH6
21.63	22.0252	21.4226	22.1091	23.0124	24.3156	24.1622	23.5254	0.00123055	0.0179221	1.95716	ANKRD17;ANKHD1
27.5867	27.693	28.0465	27.7963	27.2699	27.2594	27.1375	27.0295	0.00176344	0.0179896	-0.606536	AAAS
24.3468	24.6796	24.7836	24.6361	25.3529	25.4039	25.7506	25.2993	0.000904145	0.0180157	0.840149	RELA
29.5062	29.4467	29.492	29.4389	29.27	29.1947	29.2381	29.0412	0.0017546	0.0180317	-0.284923	LARS
23.3624	23.3365	22.6492	23.3598	21.0383	21.6907	21.8506	20.5206	0.00169939	0.0180324	-1.90193	EIF1AD
24.5399	24.6295	24.831	24.8306	24.0718	24.101	23.6861	23.6169	0.00121879	0.0180392	-0.838779	PICALM
26.0228	26.7833	27.0147	26.8815	28.3263	27.9384	28.1083	27.8306	0.0014384	0.0180828	1.37534	GLOD4
26.8027	27.0009	26.9389	27.1796	26.3299	26.5575	26.0792	26.2634	0.00175836	0.0180833	-0.672976	MOV10
26.2385	26.1291	26.4788	26.1752	27.3709	27.0713	26.8492	26.8507	0.00174634	0.0181277	0.780135	PTRF
24.2093	24.5676	23.3153	23.9058	25.5257	25.4083	25.3255	25.6594	0.00168863	0.0181304	1.48022	TSTA3
27.6976	27.3185	27.5291	27.6091	28.2071	28.25	28.2645	27.9063	0.00185636	0.018132	0.61841	RECQL
28.4179	28.4992	28.9492	29.3395	27.4737	26.6618	27.4122	26.7922	0.00121489	0.0181579	-1.71645	HMGCS1
22.9618	23.1854	22.3519	23.5835	24.2526	24.456	24.7256	24.5317	0.00175642	0.018178	1.47083	EHD2
23.9381	23.6218	23.1192	23.8457	24.5379	24.9745	24.8839	24.5603	0.00207487	0.0182029	1.10798	POLA1
25.4144	25.4028	25.684	25.3168	23.8153	24.2035	23.149	24.4352	0.00180477	0.0182062	-1.55374	RNF213
24.4164	24.5391	24.3786	24.5124	25.6087	25.0655	25.2355	24.9775	0.00191741	0.018209	0.760205	DHX33
22.7899	22.9269	22.4497	23.3232	24.1652	24.3916	23.9307	23.7801	0.00181553	0.0182245	1.19447	PITPNA
26.9358	27.2034	26.673	27.0334	26.2755	26.3586	25.9023	26.0634	0.0017387	0.0182246	-0.811462	LSS
28.4055	28.4995	28.8116	28.593	29.4329	29.3539	28.995	29.337	0.00168497	0.0182295	0.702313	CAP1
26.7989	26.9276	26.9074	26.9222	27.7301	27.5901	27.2443	27.3838	0.00175558	0.0182737	0.59808	NCAPD2
28.8954	28.9694	28.9573	29.0261	29.7255	29.2708	29.4798	29.4135	0.00207093	0.0182913	0.510326	PGAM1
23.273	23.2473	23.4556	23.9565	24.4655	24.4207	25.0403	24.5784	0.00189861	0.0183	1.1431	TSEN34
25.6821	25.5763	25.6966	25.867	26.8019	26.8017	26.1588	26.5344	0.00181335	0.0183179	0.868689	BCCIP
28.3076	28.3063	28.3173	28.6874	29.4083	29.228	29.1557	28.8898	0.00173776	0.0183226	0.765819	BUB3
27.2953	27.4937	27.3366	27.7325	28.4017	28.2948	28.5677	27.987	0.0016767	0.0183297	0.848265	PSMD6
24.8733	25.1688	24.9458	25.2089	26.6102	26.4028	25.7016	26.8017	0.00193848	0.0183762	1.32987	S100A16
27.1018	27.177	27.678	26.8741	28.1885	28.2415	28.2583	27.9508	0.00205648	0.0183805	0.95204	CCAR2
25.2516	25.4009	25.7234	25.8792	26.3495	26.5215	26.2395	26.5487	0.00188758	0.018392	0.851027	PPP2R4
23.9402	23.695	23.6127	23.9998	24.8734	24.5168	24.5867	24.3207	0.00210107	0.0184115	0.762488	TOR1B
25.4334	24.9357	24.4882	24.8729	23.8169	23.3834	23.2063	23.8533	0.00161199	0.0184134	-1.36759	HLA-A
27.9029	27.446	27.6583	27.7319	26.2706	27.0545	26.5567	26.7508	0.00166418	0.0184309	-1.02659	UFL1
27.6323	27.7048	27.8066	27.7076	28.3467	28.3592	28.3896	27.9684	0.00196429	0.0184706	0.55313	NPEPPS
23.6241	23.7112	23.7709	23.9568	23.1174	23.3815	22.9005	23.1029	0.00186222	0.0184848	-0.640186	RBM47
27.2122	26.9257	27.3574	27.3924	27.7029	28.1374	27.9834	27.9374	0.00208869	0.0185	0.718356	LUC7L3
33.7641	33.8119	34.1308	34.046	34.936	34.8402	34.575	34.4711	0.00159262	0.0185169	0.767376	HSP90AB1
29.0356	28.7609	29.0464	29.1332	29.6181	29.5465	29.4495	29.4034	0.00162008	0.0185333	0.510328	EIF4G1
22.905	22.7777	23.5175	22.9485	24.7589	24.2079	24.1916	23.9498	0.00195952	0.0185616	1.23987	MID1
23.0683	23.2585	22.7521	23.7362	21.5265	21.6438	22.0087	20.9018	0.0015882	0.0186215	-1.68359	TYMP
25.5148	25.3777	24.9176	24.8588	22.9273	23.5062	22.7708	24.0682	0.00156288	0.0186743	-1.84907	GCAT
21.8565	21.8461	21.6409	21.7976	22.1856	22.1689	22.2223	22.0021	0.00210951	0.0187238	0.359448	PRUNE
27.7664	28.0002	27.8425	27.9285	28.494	28.501	28.1871	28.3317	0.00157073	0.0187273	0.494054	NAA15
24.5512	24.4308	24.3487	24.9566	25.3707	25.9121	25.6389	25.3998	0.00156018	0.0187816	1.00858	DNAJC5
29.133	29.3036	29.599	29.8613	31.0486	30.3873	31.2655	30.7208	0.00149864	0.0187836	1.38133	TPM4
26.6267	26.7482	26.6695	26.2426	25.6781	25.6577	26.0172	25.8515	0.0015376	0.0188902	-0.770634	IGF2R
30.3889	30.5776	30.7633	30.6979	31.6428	31.3946	31.37	31.0926	0.00149823	0.0188941	0.768089	CCT6A
25.7171	25.3978	24.9993	25.4963	24.5864	24.2485	23.8344	23.9124	0.00151184	0.019	-1.2572	FAHD2A;FAHD2B
27.328	27.4162	26.8797	27.5865	27.9641	28.2434	28.1755	28.1385	0.00221085	0.0193991	0.827756	PSMD14
30.8857	31.1012	31.37	31.2548	32.0944	31.9465	31.7672	31.6742	0.0022018	0.0194906	0.717627	CCT8
25.9827	25.751	26.4579	26.2803	27.3772	27.3398	26.8519	27.0242	0.00219272	0.0195829	1.03029	PACSIN2
24.5815	24.5076	24.4532	24.4015	25.4867	25.3444	25.0035	24.9285	0.00231	0.0197222	0.704822	TAF9;TAF9B
28.4444	28.1092	28.1866	28.2132	29.1571	28.8176	29.0707	28.6568	0.00230418	0.019814	0.687182	RNMT
22.5463	22.4686	22.1109	22.2231	21.5805	21.1907	20.4735	20.7722	0.00227468	0.0199065	-1.33298	PRSS56
27.5464	27.4198	27.4583	27.7214	28.3057	27.9985	28.2068	27.9111	0.00238123	0.0204608	0.569042	MAPK1
26.176	26.1714	26.3246	25.8862	27.3328	26.9605	26.7412	26.7859	0.00242397	0.0205662	0.815567	EIF2B1
30.8451	30.7516	30.9514	30.8278	30.1061	30.1303	30.4897	30.4483	0.00241641	0.0206606	-0.550394	MATR3
34.4014	34.5294	34.9881	34.8089	35.6589	35.4441	35.5063	35.2538	0.00247861	0.021086	0.783807	HSP90AA1
25.5467	25.717	26.2019	26.1044	25.2091	25.0175	25.0204	24.8115	0.0024557	0.0211818	-0.877851	ALDOC
28.1817	28.3507	28.1251	28.1998	29.2877	29.0115	28.8548	28.6277	0.00249963	0.0211839	0.731067	PSMD3
25.2178	24.7084	24.8343	24.3611	21.5714	22.2585	22.8838	23.4927	0.00253853	0.0212444	-2.22882	REEP6
23.9164	23.3445	23.4718	22.7595	21.5239	20.0948	21.638	21.5129	0.00249398	0.0212793	-2.18067	IFI16;PYHIN1
28.5667	28.756	28.8631	29.162	29.7296	29.5052	29.3956	29.5519	0.00252629	0.0213393	0.708613	TMEM189-UBE2V1;UBE2V1
22.5202	22.3748	22.2666	22.7403	24.2199	23.6547	23.4377	23.2409	0.00258091	0.0216916	1.16281	RABIF
29.4397	29.1094	28.8821	29.5614	28.2825	28.5757	27.9408	28.1389	0.00256452	0.0217876	-1.01367	COX5B
25.5583	25.3775	26.0344	25.6188	26.789	26.6193	27.0314	26.2837	0.0026305	0.0219825	1.03358	IMPA1
24.2527	24.4301	24.1635	24.0155	25.7417	25.6175	26.4222	25.0138	0.00265957	0.0220348	1.48334	SPAG9
24.6042	24.3934	24.3945	25.0367	25.6398	25.7678	25.8315	25.218	0.00267101	0.0220862	1.00705	SNX12
25.2949	25.0062	25.0978	24.7488	25.9605	26.0878	25.6641	25.6124	0.00265252	0.022131	0.794243	EIF2B4
24.1614	24.098	23.886	24.2809	25.126	24.8432	24.7015	24.5804	0.00266743	0.0221818	0.706182	DDX49
23.7861	24.0885	24.1595	23.8269	23.4	23.4929	23.038	23.13	0.00268902	0.0222661	-0.700001	PLS1
28.8733	28.5605	28.755	28.8113	29.0453	29.1005	29.1418	29.0879	0.00277006	0.0224274	0.343856	APEX1
23.6243	23.6703	24.1909	24.1363	24.4772	24.9054	24.9854	24.8862	0.00293215	0.0235983	0.908097	PRIM1
26.9621	26.7595	26.5292	26.3806	25.9615	25.9094	25.2982	25.5233	0.0029034	0.0236975	-0.984732	MIA3
26.0378	25.3301	25.6799	25.4396	26.8417	27.0129	26.3221	26.5522	0.00288234	0.0237288	1.06034	HAT1
26.5707	26.4514	26.844	26.8003	24.8909	25.3541	26.0662	25.3034	0.00289952	0.0237975	-1.26294	SRRM1
25.6395	25.5953	25.5525	25.6224	25.2899	25.1344	24.7579	25.0291	0.00288132	0.0238298	-0.549586	ATP1B1
21.3961	20.8635	21.3903	21.5479	20.1396	20.071	20.6517	20.4591	0.00305661	0.0249756	-0.969056	RABGAP1
25.6378	25.8563	26.245	26.5199	27.7508	27.0515	27.6414	27.0414	0.00303716	0.0250776	1.30655	CDKN2A
30.9448	30.8465	31.3411	31.2574	31.8302	31.7096	31.8929	31.5788	0.00317575	0.0250824	0.655443	CCT4
26.117	26.1596	26.0496	26.2786	27.2654	26.7195	26.8695	26.6223	0.00299147	0.0251167	0.717939	KLC1
28.9114	29.102	29.6276	29.6161	30.5725	30.1634	30.3857	30.1319	0.00306597	0.0251336	0.999056	CRABP2
25.1756	26.07	24.5295	25.2816	26.8942	26.8231	27.0064	26.5565	0.00327669	0.025145	1.55589	PREPL
30.3778	30.5714	30.3935	30.2797	29.9758	30.0832	29.6761	29.8082	0.00303358	0.0251803	-0.519792	ELAVL1
23.2047	23.2647	23.2412	23.3038	23.5557	23.6738	24.0556	23.8043	0.00315935	0.0251811	0.518743	MED4
26.6041	26.4154	26.5955	26.6473	27.7688	27.2883	27.626	26.9929	0.00332173	0.025197	0.853425	CARS
24.4867	24.1987	23.6853	23.4442	20.3294	19.9552	22.5983	19.7613	0.00326737	0.0252414	-3.29263	AFAP1
29.9475	29.6983	30.2151	30.2374	30.6599	30.6451	30.6236	30.6004	0.00314287	0.0252806	0.607669	TRIM28
28.9852	28.4305	28.5038	29.0833	30.0032	29.9184	29.6763	29.432	0.00299952	0.025284	1.00679	KPNA2
29.6039	29.6713	29.5955	29.862	29.2355	29.3621	29.4272	29.2396	0.00329314	0.0252928	-0.367074	GNB1
22.4366	22.1554	21.0254	22.3621	24.2794	23.4312	23.5176	23.9523	0.00334353	0.0253283	1.80025	CKS1B
27.4203	27.324	27.6122	27.7406	28.4388	28.5524	28.7919	27.9811	0.00325423	0.0253385	0.91679	NES
19.1332	21.0809	20.1434	20.477	22.4916	22.0576	22.6834	21.9894	0.0031392	0.025381	2.09689	SNX17
31.0129	31.1138	31.5008	31.2016	32.2243	31.7992	31.975	31.7382	0.00299896	0.0253884	0.726907	PHGDH
24.6587	24.6202	24.7124	24.7764	24.0889	24.4621	24.341	24.2856	0.00338145	0.025403	-0.397529	ITCH
27.9766	27.9418	27.9617	28.4768	29.3228	28.8672	29.3347	28.7091	0.00325357	0.0254363	0.969235	PSMC3
24.8238	25.2005	25.0225	25.1054	24.5633	24.6444	24.4374	24.2408	0.00311338	0.0254458	-0.566595	CPA4
22.5736	22.4447	22.4198	22.7484	21.0568	21.4944	20.6612	21.8681	0.00338914	0.0254519	-1.27651	PROCR
32.2443	32.1868	31.9951	32.4872	33.0702	32.9232	32.718	32.7193	0.00319067	0.0254531	0.629314	EIF4A1
28.4206	28.2672	28.6094	28.4389	29.3255	29.048	29.2239	28.7708	0.00334595	0.0254586	0.658031	ARPC4-TTLL3;ARPC4
23.9153	22.6086	22.9934	23.4111	24.7598	24.7065	24.3169	24.7376	0.00344167	0.0254706	1.39812	TRUB2
27.3721	27.3037	27.3848	28.0275	28.6126	28.5221	29.3355	28.539	0.00313557	0.0254821	1.23027	TPD52L2
22.7643	22.4269	22.976	23.7218	24.8081	24.3606	24.3869	24.1831	0.0029949	0.0254938	1.46242	ILKAP;ILKAP3
27.4726	27.7122	27.1027	27.1892	26.626	26.6475	26.0454	26.4643	0.00336786	0.0254981	-0.923382	NIPSNAP1
24.2041	24.4318	24.5874	24.1421	25.0273	25.2401	25.4012	24.7969	0.00351337	0.0255273	0.775017	TSG101
31.8751	32.0462	32.1053	32.0134	32.8639	32.6566	32.3435	32.4866	0.00324754	0.0255349	0.577637	FLNA
30.2781	30.371	30.6387	30.8241	31.3384	31.1545	31.2611	31.0235	0.00338542	0.0255465	0.666404	CCT3
28.2028	27.9716	28.3054	28.5997	29.0583	28.8685	29.0822	28.8355	0.00309485	0.0255484	0.691231	SSB
26.6922	26.5912	26.5018	26.6577	27.0637	26.9077	27.2851	26.94	0.00368263	0.0255524	0.438388	RBM26
32.0729	32.267	32.4848	32.3271	31.9166	31.912	31.7654	31.7371	0.00342878	0.0255646	-0.455184	P4HB
23.286	21.2506	22.8165	22.8158	25.6847	24.7376	24.9547	24.5239	0.00312756	0.025584	2.43299	ARHGAP17
23.7001	23.8233	24.279	23.8227	24.4363	24.8332	24.9798	24.6231	0.00349873	0.0256204	0.811824	PRKCDBP
30.385	30.4296	30.4173	30.3435	30.2388	30.1546	30.0491	29.975	0.00320124	0.0256342	-0.289502	SNRNP70
26.4731	26.4688	26.8266	26.5089	26.1444	25.9407	25.6587	25.5321	0.00365196	0.0256421	-0.750394	PLOD2
22.3468	23.9453	24.1506	23.9628	21.6109	21.0623	21.8828	21.493	0.00368888	0.0256446	-2.08913	PODXL2
25.2998	25.645	24.7782	25.2747	23.8786	24.4838	24.2944	23.7727	0.00349025	0.0257143	-1.14204	NDUFA7
26.4571	26.4568	26.6288	26.6768	27.0491	26.7759	26.9702	26.9221	0.00364635	0.0257324	0.374415	STUB1
24.3717	24.5265	24.8927	24.7857	24.1902	23.9855	23.9404	24.0468	0.00364133	0.0258233	-0.603471	TRIM27
27.962	27.8298	28.3587	27.9053	29.1237	28.9175	28.6027	28.6125	0.00359752	0.0258495	0.800122	RCC2
25.7035	25.2651	25.7715	26.0731	26.7486	26.8478	26.6563	26.318	0.00354949	0.0258917	0.939347	BAT3;BAG6
26.0293	25.8281	26.5961	26.0286	24.9716	25.4999	25.0163	25.2127	0.0036062	0.0259	-0.945402	RPRD1A
25.6815	25.571	25.1371	24.6793	24.3452	24.1708	23.7353	23.7827	0.00362556	0.0259149	-1.25873	LYRM7
31.1056	31.1539	31.2234	31.1718	30.8348	30.9648	30.6143	30.823	0.00355632	0.0259424	-0.354449	IMMT
22.2632	22.038	21.1046	22.3689	23.488	23.301	23.7976	23.1404	0.00354464	0.0259855	1.48806	FBXO2
27.6782	28.1116	28.0885	27.9063	28.6889	28.8523	28.4242	28.4208	0.00429637	0.0259871	0.650368	NAA50
25.9405	26.3139	26.2178	26.5458	27.5334	27.0585	27.8346	26.9817	0.00361714	0.0260071	1.09756	NUFIP2
24.3028	23.8256	24.5612	24.6121	22.8192	23.4574	22.8808	23.5331	0.00437917	0.026051	-1.1528	SKIV2L
25.3625	25.3457	25.447	25.0096	24.7733	24.304	24.5652	24.8133	0.00422917	0.0260586	-0.677242	AP2A2
26.6253	27.1565	27.8457	27.1241	26.175	25.9907	26.0865	25.8337	0.00425167	0.0260712	-1.16645	MTX2
29.7046	29.3931	29.7435	30.0497	31.4446	30.7101	30.5575	30.596	0.00430761	0.0261093	1.10429	S100A4
28.9215	28.7005	28.7066	29.0013	29.1306	29.3166	29.3606	29.1835	0.00437821	0.0261342	0.415368	EDC4
26.2386	26.3793	26.3871	26.2604	25.3856	26.0467	25.4296	25.4748	0.00379267	0.0261379	-0.732158	VPS45
24.1289	23.7747	23.1541	24.185	25.2586	24.9132	25.2786	24.7493	0.0037702	0.0261389	1.23931	FAM49B
23.6705	24.2404	23.9087	23.8961	21.2151	20.3646	21.0961	22.9606	0.00419919	0.0261438	-2.51986	FAM177A1
24.472	24.2045	25.7116	25.4898	22.3918	23.639	22.8823	22.2083	0.00424404	0.0261558	-2.18915	GOLPH3
26.6744	25.7787	26.8368	26.9468	28.1072	27.5369	28.1014	27.8042	0.00437258	0.0262179	1.32828	TXLNA
27.5374	27.3908	27.8776	27.9009	28.857	28.4851	28.3948	28.2254	0.00443538	0.0262278	0.813909	PRMT5
21.9181	21.8391	21.359	22.5052	23.3822	22.8864	23.2239	22.9406	0.00377984	0.0262284	1.20292	UBE2A
27.7789	27.655	27.4006	27.9164	27.078	27.2924	27.0471	27.1397	0.00419386	0.0262295	-0.548441	PHIP
25.1033	25.435	24.6629	24.2491	26.6663	26.4093	25.9475	26.0287	0.00392073	0.0262357	1.4004	MRPS24
30.1017	30.2054	29.9474	29.8505	30.6348	30.4438	30.3546	30.4611	0.00389984	0.0262993	0.447321	RPL38
28.5303	28.4976	28.3809	28.5448	29.0321	28.9962	28.7715	28.7127	0.00443417	0.0263111	0.389706	EIF3L
23.3728	21.8912	23.3092	22.8115	25.5346	25.1325	24.6012	24.1989	0.00417947	0.0263158	2.02064	UBE2S
26.8932	27.3735	26.6683	27.3987	26.1309	26.309	25.7203	26.1645	0.00391453	0.0263243	-1.00222	FLOT2
22.8902	22.6848	22.5568	22.6778	23.1621	23.091	23.5711	23.2788	0.0039508	0.0263356	0.573325	LRRFIP2
28.4254	28.9002	27.6617	29.643	26.7061	26.6517	26.255	25.1728	0.00411545	0.0263576	-2.4612	COX7A2
23.4546	23.2417	23.7294	23.7882	24.183	24.2268	24.5534	24.1352	0.00387347	0.0263891	0.721126	GINS3
21.9811	22.0537	22.4638	21.879	22.7894	22.7052	22.8729	22.5756	0.00417796	0.0264026	0.641403	ZNHIT2
28.6069	28.6402	28.6239	28.5709	28.2242	28.1618	27.9783	27.6284	0.00390358	0.0264136	-0.612331	TOP2B
29.1982	28.7535	29.0467	28.9923	29.9245	29.8254	29.4008	29.5673	0.00404675	0.0264348	0.681787	EIF4G2
25.1895	24.9573	25.2739	25.6609	26.9993	26.1214	26.8798	26.1153	0.00410297	0.0264452	1.25854	TYMS
21.623	21.6965	22.0109	22.085	21.2158	20.9219	20.9139	20.3063	0.00385918	0.0264742	-1.01436	ABHD5
25.61	25.174	25.5032	25.7416	26.1437	26.637	26.8213	26.1887	0.00387027	0.0264795	0.940467	HSPA14
29.0584	28.9162	29.1217	29.6171	30.3931	30.165	29.9629	29.7724	0.00447502	0.0264984	0.894998	PRMT1
33.9348	33.9001	33.9317	34.2739	34.6442	34.3759	34.6043	34.4139	0.00408673	0.0265333	0.499445	ANXA2;ANXA2P2
25.3067	25.1727	25.6955	25.7867	24.3427	24.8792	24.8083	24.553	0.0046606	0.0265846	-0.844581	NDUFB4
26.7054	26.4102	26.7287	26.5858	27.3205	27.1487	27.2475	26.8727	0.00448023	0.0265912	0.539827	TNPO3
23.2714	23.4078	23.3991	23.5925	24.5906	24.0154	24.7439	23.9712	0.0046346	0.0266667	0.91256	SAMD1
22.8331	22.9801	23.1289	23.0163	24.2084	23.8044	24.1008	23.3546	0.00468637	0.0266748	0.877454	UBE3A
26.0117	25.8777	26.0063	25.8799	27.2903	26.4658	27.0456	26.5427	0.00449947	0.0267085	0.892225	BAG3
28.0642	28.3903	28.7586	28.8427	27.6553	27.5447	27.7341	27.8206	0.00468861	0.0267317	-0.825304	ERLIN2
26.1449	26.3794	26.0703	26.1733	25.301	25.7693	25.5342	25.8048	0.00463383	0.0267492	-0.589679	ANPEP
28.5208	28.5915	28.1941	27.7995	27.2069	26.697	25.7074	26.9445	0.00468742	0.0268135	-1.63755	IDH2
26.7338	26.852	27.3557	27.09	27.8835	27.5796	27.7789	27.5673	0.00457856	0.0268323	0.69443	PSMC4
24.0538	23.7809	24.0905	23.0422	24.7698	24.7672	24.9897	24.8184	0.00457574	0.0269159	1.09439	TNFAIP2
25.8611	25.6965	26.1035	26.7734	27.123	27.1033	27.1825	27.5466	0.00472035	0.0269666	1.13023	NPLOC4
26.3248	26.4092	26.4532	26.1763	25.3772	24.7058	25.7998	25.3621	0.0045634	0.027	-1.02962	PTGFRN
30.0496	29.9917	29.0245	28.7319	27.8476	27.567	26.1614	27.4742	0.00485765	0.0271573	-2.18686	LONP1
22.2595	21.88	21.7465	22.7828	20.9779	19.9107	20.8316	20.9544	0.0048324	0.0272381	-1.49853	DCP1A
22.8002	22.4116	25.1285	24.7201	20.2572	20.683	20.8325	21.1024	0.00486761	0.0272426	-3.04633	ORC5
21.7907	22.185	22.7131	21.0906	23.3975	24.3399	23.6595	23.4377	0.00481968	0.0273194	1.76379	UPP1
28.7944	29.042	28.5537	28.4642	27.9835	28.2734	27.8325	28.0146	0.0049339	0.0273274	-0.687581	STOML2
25.4434	24.9114	25.237	26.0294	23.6201	24.6043	23.9766	23.5647	0.00473937	0.0273697	-1.46391	HLTF
24.3529	23.731	24.1674	24.569	23.1271	22.9684	23.6116	22.8367	0.00481481	0.0274012	-1.06915	HLA-C;HLA-H
24.1009	24.2055	24.0891	24.2933	24.8945	24.5569	24.4855	24.5575	0.0048086	0.0274835	0.451411	COPS3
26.3488	26.2486	26.4017	26.7797	25.2059	25.7962	24.695	25.5101	0.00480108	0.0275663	-1.14293	NPC1
26.7117	26.3862	26.7216	26.3326	27.1334	27.1388	27.0556	26.8855	0.00500096	0.0276118	0.515316	TSR1
30.4963	30.5738	30.0739	29.9653	29.3132	29.093	28.0785	29.1075	0.00476602	0.0276495	-1.37928	OXCT1
27.5883	27.7008	27.8468	27.8893	28.5161	28.1154	28.5949	28.1693	0.00533201	0.0276629	0.592627	PSMD5
27.3902	28.2134	29.2474	28.5113	26.3501	26.8077	26.4926	26.847	0.00531499	0.0277408	-1.71625	B2M
30.3346	30.4117	30.9182	30.6315	31.6056	31.3105	31.3064	31.0458	0.00522925	0.0278177	0.743113	CCT7
28.9789	28.8159	29.2082	28.8807	29.3577	29.3354	29.3195	29.3415	0.00531427	0.0278192	0.367587	VPS35
31.0168	31.3384	31.0969	31.557	30.6217	30.6035	30.7864	30.3143	0.00522903	0.0278971	-0.67081	HNRNPAB
26.0822	25.9156	26.4935	26.8616	27.3145	27.2489	27.7502	27.2277	0.00530125	0.027898	1.04706	SYAP1
25.0585	25.2812	25.9592	25.5717	26.8912	26.5164	26.5528	26.1351	0.00538746	0.0278992	1.05625	UBE2L3
24.6218	24.9439	25.3508	25.2267	26.2448	25.6189	26.1035	25.8408	0.00515244	0.0279769	0.916181	FAF1
29.2803	29.1943	29.6264	29.57	30.5525	30.039	30.3124	29.8843	0.00520857	0.0279771	0.779323	MYL12A;MYL12B;MYL9
21.7013	21.6265	21.5483	23.108	23.8374	23.3438	23.8619	23.614	0.00528202	0.0279773	1.6683	EML4
24.7765	24.4247	25.1145	24.2499	25.336	25.4823	25.6918	25.6059	0.00516083	0.0280575	0.887583	FHOD1
25.3168	24.94	27.5951	25.0778	29.33	27.7159	29.3022	29.4055	0.00514059	0.0280578	3.20597	PTMA
23.5333	24.4589	23.5925	23.4522	22.5419	22.2237	21.1174	22.3396	0.00512271	0.0280581	-1.70357	ECEL1
21.6002	21.4693	21.8099	21.3337	22.3202	22.2554	22.7672	22.0359	0.00507156	0.0281053	0.791404	TPCN1
28.8079	29.0315	29.2693	29.3654	28.5715	28.5654	28.589	28.2762	0.00545124	0.0281341	-0.617994	SSR4
26.4022	27.1856	26.5301	26.6312	25.8957	25.9119	25.8524	25.3623	0.00513861	0.0281391	-0.931694	MAP7
28.3279	28.5739	28.2168	28.4564	27.7406	27.8328	27.0817	27.6945	0.00511944	0.0281399	-0.80635	UGGT1
26.3791	26.5832	26.5698	26.1541	26.0268	25.51	25.7045	25.8682	0.00506695	0.0281877	-0.644153	CDK9
23.5948	23.8594	23.8176	24.6445	20.0507	21.4199	22.6648	21.7922	0.00548936	0.0283111	-2.49718	SIL1
25.2344	24.8465	25.318	24.7268	26.08	25.7275	26.1409	25.5654	0.00548436	0.02839	0.847037	CAPZA2
27.0768	27.1816	26.9015	27.127	25.6949	26.5458	26.4732	25.9569	0.00550692	0.0284321	-0.904033	RBM17
33.4422	33.5408	33.7649	33.6008	33.8971	33.8823	33.903	33.833	0.00570226	0.0288283	0.291704	LMNA
28.3082	28.4927	28.4308	28.2746	28.9871	29.1487	28.5991	28.8996	0.00558939	0.0288729	0.53208	EZR
25.5546	26.1273	26.4592	26.459	27.1884	27.3157	26.9938	26.9571	0.0056767	0.0289071	0.963736	PPM1G
28.0038	27.6697	28.0366	27.7649	27.0996	27.2397	26.2862	26.9781	0.00563715	0.0289121	-0.96784	ACOT13
20.3629	21.1848	21.3066	21.6574	23.0157	22.571	23.3141	22.0764	0.00567052	0.0289863	1.61635	RIN1
28.4575	28.3433	28.1551	27.8011	27.0843	27.2303	26.0839	27.1808	0.00563399	0.0289917	-1.29445	SRPR
25.8751	25.9334	25.1765	25.5811	26.8804	26.8593	26.5803	26.1949	0.00575808	0.0294457	0.987236	PPP2R5D
22.4868	22.0659	21.1499	21.7737	23.702	23.8542	22.7158	23.5215	0.00585027	0.0300379	1.57932	GTPBP8
28.9617	28.9733	28.9893	29.5992	30.2886	29.7263	30.0243	29.8152	0.00593404	0.0302595	0.832717	PSMA5
29.4023	29.9427	30.104	29.7538	29.0304	29.1401	28.343	28.8289	0.00595649	0.0303396	-0.965073	AIFM1
25.9897	26.7941	27.5549	27.6487	25.5996	25.2149	25.3218	24.6926	0.00596225	0.0304194	-1.78964	TGM2
30.72	30.8159	30.8641	30.859	31.64	31.3314	31.0562	31.295	0.00602726	0.0305134	0.515865	DYNC1H1
32.6346	32.4541	32.4994	32.7794	33.0097	33.1403	32.9841	32.8339	0.00605177	0.0305707	0.400152	AHNAK
28.1421	28.0606	28.5922	28.6461	29.4581	29.1346	29.5665	28.8817	0.00602512	0.0305952	0.899989	IPO7
25.7951	25.5755	26.0571	25.9436	27.1435	26.4365	26.552	26.4725	0.00615724	0.0308995	0.808288	PRKAR1A
24.6837	24.4806	25.5937	25.4516	22.2705	23.3068	23.6711	23.7334	0.00609442	0.0309574	-1.80697	PSM8;PSMB8
25.1084	24.9066	25.0436	24.8072	23.9052	24.3004	24.2722	24.6466	0.00614544	0.0309814	-0.685338	DHX29
22.8506	23.7	23.1958	22.9202	22.0377	22.2581	22.1185	22.5624	0.00631838	0.0309843	-0.922458	SAP130
22.8054	21.4667	22.2779	22.7936	23.4129	24.3309	23.6837	24.0904	0.00629153	0.0310656	1.54355	PYCRL
23.599	23.4654	23.1807	23.1792	22.32	22.4138	21.1503	22.3084	0.00627658	0.0310737	-1.30792	YIPF6
23.5421	23.7569	24.0011	24.3956	25.3544	25.1259	24.777	24.5853	0.00620294	0.0311557	1.0367	QRICH1
27.158	27.0137	27.2287	26.9773	27.9744	27.6943	27.582	27.3791	0.00642147	0.031342	0.563025	ABCE1
27.2199	27	27.2172	27.1596	26.7375	26.8716	26.3314	26.4488	0.0065086	0.0313646	-0.551877	EGFR
28.243	28.8243	28.8856	28.9087	29.3052	29.5028	29.839	29.4116	0.0065251	0.0315948	0.799283	MCM2
28.0638	28.2849	28.5021	28.5302	29.6753	29.0792	29.5995	28.8101	0.00687275	0.032202	0.945779	GLRX3
20.7371	21.1665	22.924	21.1455	24.254	23.6051	23.3285	23.3863	0.00674272	0.0322341	2.15022	CNOT3
28.5663	28.8155	28.4909	28.6186	27.5691	28.2546	27.4535	27.9909	0.00666381	0.0322577	-0.805808	TIMM50
28.3461	28.6974	28.2975	28.261	27.533	27.9159	26.9973	27.6453	0.00682144	0.0322835	-0.877623	TMED10
26.0436	25.9297	25.6603	26.2546	26.8858	27.001	27.3482	26.4026	0.00671455	0.0323163	0.937366	TXLNG
27.3802	27.2797	27.5153	26.6676	28.3218	27.9527	28.2249	27.8601	0.00670794	0.0323385	0.879179	PFDN6
32.6656	32.6076	32.4801	32.4907	33.184	33.0031	32.811	32.8338	0.00665723	0.0323411	0.396973	RPS3
23.2451	23.0426	23.9689	22.4771	24.9423	24.8721	24.8092	24.0718	0.00678825	0.0323655	1.4904	IFT27
25.5988	25.3712	25.3659	25.5227	25.8818	26.1722	25.8343	25.7419	0.00671355	0.032399	0.442858	DHX8
24.6363	24.7408	25.1722	25.1661	25.6257	25.7876	25.3609	25.6323	0.00669428	0.0324216	0.672799	UBL4A
28.8984	28.798	28.8171	29.0748	27.1654	27.8305	28.2688	28.1599	0.00664011	0.0324249	-1.0409	HNRNPUL2;HNRNPUL2-BSCL2
27.7686	27.8063	27.8046	27.9911	28.4831	28.1522	28.1742	28.1279	0.00695036	0.0327218	0.391687	PFKP
22.0533	22.1212	22.466	21.8049	23.4666	23.1784	22.5151	23.2446	0.00694326	0.032804	0.989819	UAP1L1
32.7189	32.7615	33.1538	33.2334	33.9761	33.5293	33.9684	33.4654	0.00693762	0.0328866	0.767912	PKM
29.9874	30.0913	30.494	30.3001	31.1214	30.6876	30.8733	30.6675	0.00699519	0.0332668	0.619243	MTHFD1
26.1454	25.3644	25.1833	26.3263	26.9933	26.8742	26.8862	26.8371	0.00698826	0.03335	1.14287	PSMD7
21.3354	21.3305	22.6465	23.2357	20.1771	20.5033	19.8459	20.0069	0.0070424	0.0334328	-2.00372	TTI2
29.3894	29.1748	29.2562	29.1959	29.9859	29.7835	29.5299	29.5673	0.00729046	0.0338973	0.462544	EIF3A
33.3004	33.308	33.5699	33.5666	33.8901	33.8581	33.706	33.7188	0.00727352	0.0339804	0.357065	CSE1L
28.7906	28.948	28.3976	28.5434	27.8222	28.0987	27.708	28.2561	0.00733626	0.0340098	-0.698648	ATP5J
28.1097	28.1304	27.7841	26.847	26.3212	25.989	24.8695	26.3585	0.00726417	0.0340639	-1.83325	LPCAT1
24.2513	24.1575	24.6907	24.3631	23.6987	23.3632	22.3347	22.5236	0.00723315	0.0341478	-1.38562	ITGA3
30.2387	30.0707	30.036	30.0349	29.9375	29.4998	29.5523	29.6512	0.00721181	0.0342321	-0.434875	BSG
33.7429	33.5837	33.9344	34.0702	34.5541	34.3631	34.4041	34.1578	0.00717005	0.0342531	0.536966	HSPA8
25.2951	25.3497	25.9821	25.9175	27.1322	26.5496	26.9593	26.2297	0.00742214	0.0343066	1.08162	HN1L
21.8455	22.1416	22.4096	22.8185	23.4867	22.9643	23.2449	23.2005	0.00749928	0.0343092	0.920278	NELFE
22.1749	21.8332	21.4926	22.1659	22.7225	22.7207	22.6046	22.431	0.00718693	0.0343168	0.702999	C1orf131
25.618	25.8084	25.7511	25.9174	26.2492	26.3886	26.1667	25.9749	0.00752178	0.0343711	0.421114	ARMC1
27.1069	27.5192	27.4444	27.7222	26.5052	26.98	26.4394	26.9018	0.0074774	0.0343923	-0.741557	MYDGF
25.5724	25.3954	25.9346	25.8259	26.4782	26.1649	26.3305	26.102	0.00754167	0.0344423	0.586849	IKBKAP
24.4242	24.418	24.866	24.6222	25.3368	25.262	25.0144	24.9517	0.00745659	0.0344757	0.558674	RNF40
25.048	24.7235	25.4441	25.1801	26.3136	26.105	25.7709	25.6232	0.00762965	0.0348777	0.854286	NOB1
26.6802	26.9767	27.2441	27.3647	27.6251	27.6336	27.7332	27.7014	0.00770573	0.0352745	0.606892	MAT2B
26.3739	26.3885	26.8356	26.4548	26.9613	26.9082	27.026	26.9182	0.00774992	0.0352857	0.44024	DNAJC7
21.2196	21.1535	21.4611	19.8603	22.3955	22.5026	22.1313	22.4149	0.00805784	0.0353486	1.43743	GSK3A
27.1088	27.2994	26.9115	27.5379	26.4996	26.0903	25.601	26.5723	0.00770527	0.0353589	-1.02356	SUCLG2
24.3995	24.6361	25.3842	24.9254	23.7803	23.2694	24.1669	23.7572	0.00802912	0.0354299	-1.09283	WDR55
22.5918	22.9185	22.7058	22.93	23.1776	23.0885	23.2565	23.0745	0.00802187	0.0355115	0.362751	ZCCHC17
25.9562	25.9324	26.4873	26.1583	27.469	26.8454	26.882	26.6838	0.0079789	0.0355935	0.836503	ATXN10
25.9959	25.6523	25.844	25.7178	26.6715	27.0334	26.1408	26.4991	0.00789481	0.0355981	0.783668	DHX38
23.3284	22.7863	23.2056	22.9404	22.6058	22.3089	22.6418	22.3051	0.00795718	0.0356759	-0.599772	C17orf49;BAP18
27.3075	27.3608	27.649	27.7736	28.9671	28.0281	28.3367	28.3187	0.00788366	0.0356815	0.889932	PSMB7
27.6268	27.8497	27.9692	28.2154	28.9687	28.3709	28.7148	28.4491	0.00815358	0.0356895	0.71064	EIF3M
27.1641	27.465	27.1312	27.2491	26.4897	26.033	26.406	26.9406	0.00792003	0.0357116	-0.785023	LYPLA1
21.8361	21.3121	21.1242	21.5347	22.7507	22.3229	22.3145	21.9336	0.00818524	0.0357358	0.878671	SNAPIN
28.476	28.2222	28.1501	28.253	28.6519	28.7203	28.5478	28.513	0.00778134	0.0357435	0.332945	MTA2
28.6385	28.9562	28.7884	27.9947	24.1978	26.5036	26.3779	27.0148	0.00793962	0.0357587	-2.57094	BASP1
26.9503	27.1027	27.0538	27.0224	27.6722	27.3758	27.5507	27.2049	0.00786583	0.0357653	0.418609	RPS6KA3
22.8424	22.7937	23.1419	23.1167	24.1694	23.4386	23.9033	23.4689	0.00814524	0.0357712	0.771388	TRAF2
30.1611	30.5878	30.5271	30.2105	30.0318	29.6606	29.5638	29.8699	0.00791627	0.0357949	-0.590111	FH
28.0599	27.971	28.0691	27.6332	27.4666	27.52	27.59	27.3206	0.00786434	0.0358494	-0.459002	GOLGB1
28.7506	28.5037	28.3416	28.7472	29.5104	29.4487	29.0783	28.9546	0.00786362	0.035934	0.662215	EIF3E
26.2348	25.6034	25.5979	25.5859	24.9676	24.8751	25.1893	25.1907	0.00782545	0.0359526	-0.699815	PPP1R9B
22.2446	21.4435	21.3145	22.7873	24.8755	23.7325	25.4904	23.2963	0.0078567	0.0360189	2.4012	TBC1D13
21.5328	22.0616	21.1616	22.6278	23.1753	23.3158	22.916	23.0759	0.00836543	0.0361982	1.27481	SNCA
25.611	29.7195	29.536	27.1485	22.1618	22.2173	25.2739	23.4045	0.00839103	0.0362148	-4.73939	ATPIF1
25.5751	26.164	24.9633	24.4957	22.0851	24.1397	21.6933	23.1152	0.00837885	0.0362517	-2.54119	MIPEP
26.4268	25.8041	25.8922	25.4045	26.9767	26.8713	27.4249	26.5462	0.00834811	0.0362799	1.0729	FAM98B
28.174	27.8348	27.7457	27.8043	27.6512	27.1609	27.1318	27.1035	0.00824835	0.0362902	-0.627886	INF2
21.0477	20.5175	20.8081	21.1996	23.9208	21.6414	23.64	22.6713	0.00838943	0.036296	2.07516	FHL1
26.5663	26.2974	25.423	26.6986	27.8567	27.6057	27.6293	27.0538	0.00830462	0.0362986	1.29006	IMPDH1
26.5756	26.1809	26.5022	27.1885	28.1264	27.6669	27.7309	27.236	0.00824273	0.0363727	1.07825	TOMM34
27.5936	27.8199	27.6144	27.6836	27.2928	27.546	27.3866	27.3154	0.00880856	0.0364078	-0.292644	TARDBP
29.8468	29.6585	30.1995	30.2006	30.7517	30.4409	30.9838	30.5159	0.00876605	0.036487	0.696693	NACA
23.3377	23.4239	23.0393	22.3681	23.8224	24.2069	25.0737	24.5276	0.00869922	0.0365066	1.36541	MAP2K3
26.4712	26.837	26.3382	25.5845	22.5151	24.0459	20.8795	24.5352	0.00872309	0.0365664	-3.31379	MACROD1
24.3661	24.4951	24.6972	24.7874	23.2535	23.7704	23.2744	24.2225	0.00867319	0.0365864	-0.956222	GTF2F2
28.2292	28.0453	28.5231	28.2288	27.9182	27.8377	27.8854	27.841	0.00862424	0.0366623	-0.386005	RBM4
26.8246	27.1745	26.3844	26.5291	24.9491	25.5921	26.0977	25.7322	0.00866941	0.0366667	-1.13535	CLPP
25.8806	25.6333	25.6883	25.7887	25.8982	26.2866	26.2853	26.1539	0.00863794	0.0367048	0.40829	GTF3C5
25.2772	25.5925	25.4623	25.4817	24.6608	24.9537	25.0889	25.1546	0.00862239	0.0367434	-0.488953	DPM3
25.7879	25.7869	25.6441	26.0116	25.5294	25.3906	25.5546	25.3341	0.00865827	0.0367473	-0.355449	P4HA2
27.6312	27.7192	27.496	27.5115	27.8533	27.9832	28.2085	27.8448	0.00861671	0.0368248	0.382979	AIMP1
25.3644	25.4019	25.2216	25.8916	26.4845	26.0476	26.4444	25.9585	0.00848159	0.0368482	0.763889	HEXA
24.5517	24.7131	25.2598	24.8237	26.5412	26.9412	26.6046	25.2886	0.00861236	0.0369067	1.50685	MTPN
24.8252	25.2654	25.5011	24.637	23.6925	23.6422	21.6611	23.2798	0.00854456	0.0369087	-1.98827	SLC4A7
24.9839	24.8268	25.3542	25.7427	26.3419	25.8968	26.8181	26.1317	0.00919141	0.0370598	1.07024	RTF1
22.1653	20.5257	21.7956	21.6046	22.8243	23.0852	22.7427	22.873	0.0092126	0.0370661	1.35847	DAPK3
27.2243	27.5608	26.8938	27.9418	28.8182	28.0165	28.4217	28.74	0.0091839	0.0371392	1.09393	FERMT2
29.0104	29.1998	28.7954	28.8544	28.4255	28.1	28.6421	28.4922	0.00925835	0.037166	-0.550065	CHCHD3
28.111	28.384	28.234	28.4669	27.62	27.8638	27.0169	27.6748	0.00914567	0.0372189	-0.755078	PCYOX1
26.114	26.9576	27.8199	27.4856	28.5931	28.5711	28.7755	28.2875	0.00900764	0.0372641	1.46252	CPNE1
26.0314	26.4129	25.7451	25.2808	23.2116	24.5681	24.9067	24.1539	0.00909178	0.0372989	-1.65747	ABHD10
24.8854	24.7367	24.5738	24.6081	25.38	24.9602	25.6194	25.1997	0.00934829	0.0373053	0.588841	EZH2
24.5006	24.2874	23.9009	25.6157	25.6644	26.4656	26.4897	25.9916	0.00931452	0.0373249	1.57672	CDCA8
27.9098	27.388	27.222	28.3487	25.2058	26.5485	26.2295	26.6221	0.00928345	0.0373729	-1.56565	NDUFA5
26.5918	26.5342	26.8623	26.7873	27.0729	27.0589	27.2528	26.9347	0.00908147	0.0373793	0.385906	RPA1
23.5939	23.8238	24.0634	23.9227	24.9931	24.7946	24.4539	24.2028	0.00930178	0.0374038	0.760145	PRPSAP2
23.1597	23.1146	22.6268	21.8177	21.3274	21.7451	20.8346	21.3359	0.00928242	0.0374522	-1.36892	SLC22A18
26.7617	26.5787	26.8609	26.7103	27.507	27.5069	27.0381	27.0579	0.00906691	0.03746	0.54957	CLUH
27.8298	28.0006	28.2711	27.8924	27.5573	27.6007	27.6372	27.2714	0.00943763	0.037652	-0.481829	USO1
29.8098	29.8234	30.2544	30.1702	30.741	30.4774	30.9343	30.4141	0.00943373	0.0377311	0.627259	TCP1
26.107	25.9785	26.1761	26.256	26.8704	26.6995	26.7864	26.2889	0.009474	0.0378243	0.531898	SUPT6H
27.0113	27.108	27.4706	26.9573	27.6985	27.8952	27.6784	27.4595	0.00959293	0.0380083	0.546105	DDX56
30.7806	30.6684	30.9204	30.9357	30.5089	30.456	29.9807	30.3565	0.00994327	0.0380771	-0.500742	MSN
22.3739	22.4137	22.56	22.9352	20.6705	21.3717	21.1135	22.1371	0.00955765	0.0380877	-1.24752	SMC5
25.8334	25.9637	26.2838	26.2558	25.2873	25.6201	25.6556	25.6501	0.00962058	0.038104	-0.530876	LAMTOR1
28.1768	28.594	28.7454	28.8917	29.8176	29.4774	29.7304	28.9895	0.00970324	0.038107	0.90175	PSMB6
24.2764	24.4838	23.576	23.6928	26.4234	26.29	24.6669	25.5246	0.00975784	0.038135	1.71898	DDX28
26.9144	27.0789	26.9633	27.3604	27.6317	27.7088	27.883	27.3389	0.00992706	0.0381545	0.561327	HSPA4L
23.8973	26.0182	25.7823	25.448	23.4696	23.7667	23.2237	23.3522	0.00973291	0.0381602	-1.83339	SSR3
28.4765	28.439	28.6234	28.6388	28.2527	28.155	27.654	27.6912	0.00984515	0.0381714	-0.606209	NDUFB10
21.0508	21.1834	21.5271	21.5382	21.8509	21.7636	21.9107	21.7154	0.00987833	0.0381752	0.485271	GLMN
25.1767	25.1487	24.8754	25.7743	26.8101	25.9015	26.1756	26.1396	0.00969836	0.0381856	1.01292	PMM2
21.3242	20.8	20.2696	21.6022	22.7544	22.4443	21.9136	22.0906	0.00973898	0.0382131	1.30172	ELMSAN1
30.34	30.3615	30.5814	30.5353	30.7609	30.7267	31.0067	30.7062	0.00969487	0.0382645	0.34559	RPS7
21.0884	21.0473	22.9915	22.8147	23.7677	23.9099	24.1003	24.2567	0.00968804	0.0383437	2.02319	HIP1R
24.6003	24.5503	24.5011	24.5911	21.3118	19.9912	22.6462	23.3026	0.0096615	0.0384232	-2.74775	HLA-G
28.1192	28.2557	28.7338	28.1524	29.3331	28.9066	29.1457	28.7405	0.0100048	0.0386154	0.716248	SARS
24.1949	23.987	24.2093	24.1068	24.5723	24.4559	24.4351	24.9473	0.0101185	0.0388514	0.478135	NCAPD3
25.5175	25.1305	25.4768	25.4657	25.7655	25.9603	25.8514	25.6531	0.0101164	0.0389296	0.409986	NUMA1
27.2447	27.1736	27.4677	27.2138	27.7684	27.5665	27.6691	27.4665	0.0100875	0.0390081	0.342658	NARS
27.3311	27.0374	27.312	27.0548	28.3471	28.2656	27.4531	27.9081	0.0100868	0.0390869	0.809657	DDX24
26.794	26.7554	26.4838	26.3194	25.5865	26.0515	25.6835	26.2319	0.0101877	0.0391423	-0.699822	PLXNB2
27.8416	27.9467	28.58	28.0972	29.0934	28.8989	28.9041	28.5339	0.0101914	0.039144	0.741206	GSPT1
28.5031	28.3513	28.5901	28.1329	27.9568	27.7712	27.5053	28.0458	0.0102509	0.0391776	-0.574585	DDX47
27.2012	26.6595	26.8371	26.7954	25.9753	26.2872	26.3804	26.4908	0.0103074	0.0392778	-0.589859	ZFR
22.6791	23.4078	22.3126	22.4229	20.209	21.6545	21.5802	21.2663	0.010274	0.0393147	-1.52808	SPG7
22.5523	22.2851	22.4029	21.8693	23.0962	24.0613	24.0749	22.9152	0.0102895	0.0393559	1.2595	ZNF281
29.2841	28.971	28.8873	29.1497	29.9873	29.5584	29.4095	29.5817	0.0103224	0.0394218	0.56121	EIF3B
28.0556	27.9695	27.9794	28.2492	27.2771	27.3641	27.6534	27.8351	0.0103671	0.0395178	-0.530978	NAPA
21.3178	21.7987	22.0356	21.6493	19.5643	21.117	20.2709	20.5919	0.0104125	0.0397475	-1.31435	KDM5A
29.34	29.4013	29.1991	29.9932	30.2753	30.1284	30.4521	30.0033	0.0106285	0.0398285	0.731408	ST13;ST13P5;ST13P4
21.8767	23.0257	23.4297	22.2608	21.1207	21.554	21.037	21.4126	0.0105968	0.0399062	-1.36713	MBLAC2
25.5607	25.2074	25.2626	25.0466	24.784	24.9095	24.4066	24.2866	0.0104837	0.0399529	-0.672657	WDR11
27.558	27.5369	27.2038	26.4489	26.0385	26.1967	25.1023	26.0917	0.0105011	0.0399843	-1.3296	HMOX2
29.7034	29.7277	29.8111	29.6052	30.3636	30.1931	29.8906	30.027	0.0104756	0.0400314	0.406688	YBX3
23.4015	24.3162	23.4456	22.9918	22.4335	20.5724	21.9743	21.9966	0.0106695	0.0400778	-1.79454	C14orf1
25.3879	25.6617	26.2821	26.0069	26.4568	26.6172	26.7066	26.5355	0.0104707	0.0401102	0.744386	SURF6
27.1289	27.1071	27.8535	27.3079	28.6117	28.2222	28.0872	27.8765	0.0106963	0.0402485	0.850045	CHORDC1
24.6815	24.8256	25.7387	24.7642	24.1083	24.1131	23.1543	23.7548	0.0107665	0.0403707	-1.21989	TOR1A
24.4724	23.886	24.5747	23.9369	23.6231	23.5994	23.0385	23.3309	0.0107508	0.0404487	-0.819551	UBE4A
25.0162	24.4307	24.3591	24.6431	25.4646	25.2081	25.1505	25.0906	0.0107343	0.0405271	0.616172	REXO4
25.3136	25.5662	24.5607	24.8641	24.3966	23.7068	23.9254	24.2731	0.0108539	0.0406296	-1.0007	COQ9
25.9379	25.9391	26.4455	26.4021	25.5725	25.4698	25.7886	25.2158	0.0108499	0.0407077	-0.669446	GOLGA2
22.1972	26.4375	21.1126	22.4293	27.4989	27.4371	27.1463	27.1285	0.0108743	0.0407663	4.25854	CMAS
23.4354	24.2423	24.5793	24.2653	22.4651	22.5454	23.5863	22.7694	0.010831	0.0407861	-1.28899	APOBEC3C
26.752	26.3873	26.3497	27.3915	27.6709	28.0154	27.8001	27.3878	0.010922	0.0409254	0.998451	PSME3
23.7606	23.4841	24.0595	23.6213	24.1902	25.0954	25.4604	24.5793	0.0114022	0.0416224	1.09995	NRF1
27.6557	27.5254	27.4447	27.7349	26.8912	26.8451	27.4326	26.6909	0.0115207	0.041637	-0.625226	APOO
22.2925	22.5413	22.4674	22.2708	21.3207	21.4881	21.2162	22.1984	0.0110567	0.041661	-0.837164	ALDH3B1;ALDH3B2
25.7009	26.0414	26.4335	26.2921	27.2441	26.8536	27.7077	26.6748	0.0115761	0.0416636	1.00309	NCAPH
21.3841	21.025	21.4845	22.0948	22.5652	22.0849	22.3798	22.5702	0.0111758	0.0416938	0.902953	C12orf57
27.3107	27.5813	27.7552	27.7932	26.9629	27.2152	27.1121	27.2814	0.0114565	0.0416952	-0.467163	DBN1
25.2422	25.5418	25.4424	25.1928	22.3908	20.5737	20.8717	24.5239	0.011392	0.0417004	-3.26476	SLC11A2
24.0431	23.7261	23.3448	23.7541	23.4162	22.8062	22.7173	22.5996	0.0114867	0.0417143	-0.832177	CNNM3
25.2898	25.0482	24.7609	25.3997	26.1434	25.4955	25.9877	25.7376	0.0118262	0.0417153	0.716422	PCNP
25.4271	25.4764	25.9148	26.0471	26.9159	26.2776	26.2516	26.6272	0.0111137	0.0417381	0.801743	NUDCD1
23.4891	23.0713	22.6654	22.4072	21.4493	21.2972	20.7583	22.317	0.0110329	0.0417405	-1.45277	LNP
25.7721	26.0273	26.4908	26.7071	28.0122	26.9114	27.3126	27.2581	0.0116446	0.0417565	1.12424	PFDN5
24.9707	25.5417	25.8374	25.758	27.0339	26.2364	26.311	26.3985	0.0111457	0.0417727	0.968039	ZYX
24.9822	24.9681	25.522	25.2128	26.2825	26.0027	26.5934	25.5348	0.0114541	0.0417728	0.932095	PBK
23.2272	22.617	23.2283	23.6214	24.4699	23.9894	24.3913	23.7331	0.0113849	0.0417786	0.972435	CCDC43
25.2186	25.3447	23.7244	23.7668	22.5188	22.9111	20.6679	22.4127	0.0117219	0.0417827	-2.38601	NDUFAF7
26.8595	26.8461	27.0206	27.3583	27.8932	27.5584	28.117	27.4058	0.0112383	0.0417887	0.722452	LSM3
27.9689	27.9263	27.7842	27.6591	27.2919	27.6285	27.4266	27.5422	0.0118082	0.0417916	-0.362331	AGPS
28.0826	27.8552	27.3998	27.8801	26.9595	26.9107	27.1594	27.4613	0.0117518	0.0418088	-0.681705	RMDN3
26.4282	26.3508	26.0903	25.8993	25.3256	25.5427	24.1181	24.9067	0.0111092	0.0418175	-1.2189	PDIA5
31.2678	31.2418	31.7418	31.8189	32.4254	32.1258	32.0314	32.0377	0.011774	0.0418275	0.637456	TPM3;DKFZp686J1372
21.8642	21.4073	22.0176	21.7928	22.8168	22.6558	22.1162	22.3879	0.0114535	0.0418507	0.723682	ARHGAP35
28.6494	28.7353	28.6573	29.034	27.5599	28.2654	27.7502	28.3751	0.0113405	0.0418571	-0.781351	SNRPD1
28.9318	29.0569	28.4627	28.5069	27.9204	27.7403	26.6253	27.8365	0.0118073	0.0418681	-1.20895	PYCR1
21.2676	19.2061	22.7081	20.8532	24.1024	23.8762	23.5296	23.259	0.0112908	0.041936	2.68305	PAPSS2
26.4581	26.7312	26.7878	26.3726	26.2483	25.646	26.147	25.7311	0.0118339	0.0419454	-0.644303	LAP3
28.4549	28.1279	28.8292	28.7151	29.4399	29.4569	29.4035	28.855	0.011972	0.0429745	0.757004	PSMA4
25.9319	25.7475	26.338	26.0962	23.0183	24.9128	24.3835	25.0192	0.0119889	0.0429982	-1.69496	NIPBL
24.8419	24.9223	24.3996	24.7667	25.3257	25.3415	25.1298	25.0578	0.0120563	0.0432536	0.481091	ITPR1
30.859	30.7777	30.7868	30.4669	30.9727	31.183	31.1891	31.0159	0.012107	0.0433297	0.367591	EIF2S3;EIF2S3L
23.7038	25.3977	24.4633	24.4216	23.3205	22.7958	22.194	23.3802	0.0121051	0.0434079	-1.57397	LGMN
23.45	24.4205	23.9381	24.2052	22.6705	22.9179	23.5524	22.6135	0.0120774	0.0434141	-1.06487	RRAS
25.4129	25.0046	25.3012	25.1787	26.3681	25.7135	25.7686	25.6745	0.0121755	0.0435755	0.656825	ATP6V1E1
29.0415	29.5508	29.3725	29.9453	30.706	30.1947	30.8255	30.0185	0.0122914	0.0437204	0.958687	HDGF
27.7692	27.1949	27.3716	27.335	28.2618	28.0696	28.2738	27.6826	0.0122596	0.0437989	0.654277	UBE2I
25.5516	25.8719	26.2843	26.3569	27.1471	26.5809	27.1649	26.6407	0.0123524	0.0438929	0.867198	DCTN1
24.9509	24.8971	24.6046	24.5883	24.1155	23.8145	23.2131	24.2943	0.0124266	0.0439075	-0.900867	CD46
26.061	25.2845	26.0804	26.169	26.7767	26.9413	26.5462	26.5452	0.0123473	0.0439714	0.803604	CDV3
30.9974	31.3379	31.1453	31.3136	30.2061	30.7864	30.2876	30.8706	0.0124011	0.0439857	-0.660892	CALR
27.1583	27.5168	27.749	27.8964	28.859	28.3829	28.9813	27.9986	0.0125946	0.044	0.975321	PFDN2
30.407	30.3124	30.2061	30.3722	30.8259	30.6594	30.6291	30.4426	0.0128713	0.0440346	0.314866	SF3B2
22.3151	21.8683	21.54	21.6547	21.1878	21.1351	21.3817	20.9134	0.0125712	0.0440779	-0.690034	LRRC8D
26.7601	26.7455	27.1491	27.3679	28.0104	27.6099	27.598	27.4822	0.0128612	0.0440972	0.66944	DNM2
21.7395	21.4881	21.7929	21.6457	23.3468	22.691	21.9438	22.9475	0.0125419	0.0441064	1.06572	TRIM47
25.5115	25.9399	26.4772	26.5514	27.5257	27.3724	27.6036	26.6224	0.0128695	0.0441109	1.16102	DYNC1LI1
24.9151	24.9098	25.0275	23.722	23.3905	22.383	21.6293	23.5413	0.0128489	0.0441739	-1.90758	HMGCL
24.6112	24.5095	24.1944	24.8414	25.9776	25.1822	26.2862	25.1532	0.0125014	0.0441847	1.11068	CAST
25.9164	26.3452	26.3956	26.3655	26.8708	26.8242	26.7492	26.5143	0.0128875	0.0442003	0.483954	USP9X;USP9Y
26.5454	26.2687	27.2527	26.9999	27.7409	27.4104	27.9772	27.5132	0.0126902	0.0442116	0.893756	PSMD8
20.9473	22.0466	22.5466	22.0702	23.0003	23.1287	23.4822	23.0054	0.0127533	0.0442175	1.2515	RANGRF
22.7093	23.0783	21.8065	21.7872	23.8484	23.6831	23.1353	24.0716	0.0127138	0.0442324	1.33931	SELK
24.3871	24.191	23.2999	24.1987	25.0535	25.0537	25.1657	24.6173	0.0128443	0.0442509	0.953411	SPIN1
27.3481	27.3017	27.9777	27.6284	28.2249	28.0346	28.6389	28.191	0.0127583	0.0442522	0.708416	CTPS1
29.1028	28.8474	29.0834	28.9952	28.6392	28.8391	28.459	28.7119	0.0127494	0.0442953	-0.344886	MYO1B
28.0649	27.7973	27.8734	28.3785	28.7526	28.6538	28.6672	28.3109	0.0128265	0.0443281	0.567597	SEPT9
24.9079	24.7543	23.6196	24.545	22.9336	23.374	21.6052	23.1036	0.0130135	0.0444	-1.7026	MOSPD2
26.4572	26.2099	26.4217	25.8571	25.7164	25.1983	24.7254	25.6092	0.0128199	0.0444056	-0.924146	NDUFC2
25.0816	25.2391	24.4261	25.1167	24.2575	24.4078	24.368	24.0794	0.013042	0.0444269	-0.687697	ABCB6
22.9155	22.5833	23.1128	22.7089	19.325	20.885	21.2712	21.9408	0.0130931	0.04494	-1.97467	UGT8
27.7401	28.2868	27.7208	27.9186	27.4505	27.2724	26.6344	27.2367	0.0131721	0.045012	-0.768084	GSTK1
24.6067	24.2469	24.0931	24.2538	25.2144	25.3216	25.0853	24.5124	0.0130892	0.0450172	0.733282	STAU2
21.2814	22.9798	23.0798	22.1078	20.4477	20.344	21.2537	20.8616	0.0131325	0.0450411	-1.63546	NME6
26.3088	26.7317	27.0231	27.047	27.7364	27.5608	27.3326	27.2833	0.013195	0.0450717	0.700639	ANXA7
25.3216	25.7384	25.4203	25.0946	25.9743	26.3777	25.7751	25.9984	0.0132252	0.0451516	0.637653	LARP7
23.8676	24.1932	24.6218	24.3723	23.6625	23.4806	23.8663	23.36	0.0132486	0.0452585	-0.671377	SLC30A1
25.6385	25.9608	26.621	25.7884	27.2311	26.8761	26.6752	26.709	0.0133575	0.045261	0.870693	PSPH
20.8111	20.408	21.5319	21.0811	21.4719	23.8355	24.0201	23.1539	0.0135974	0.0452688	2.16232	C11orf31;SELH
24.5598	24.6745	24.7845	24.5433	24.075	24.4271	23.5709	23.7089	0.0133876	0.0452792	-0.695037	MRPL23
29.4688	29.4448	29.7835	29.2049	30.1173	30.013	29.9269	29.7753	0.0132682	0.0452903	0.482649	RALY
27.817	27.6482	27.4092	28.2128	28.4742	28.2903	28.4258	28.3147	0.0134954	0.0453154	0.604439	WDR12
24.627	26.0028	23.9125	25.8349	24.0552	21.7116	20.3376	20.3468	0.0135699	0.0453445	-3.4815	PET100
23.5989	21.1268	23.4464	22.0954	24.7558	24.6599	24.456	24.5645	0.0134949	0.0453916	2.04217	C9orf64
26.0471	26.0994	26.881	26.5265	23.9882	24.067	25.6972	25.2724	0.0135493	0.0454204	-1.63227	GLB1
23.0303	22.7958	22.5016	22.8629	24.6323	24.2884	25.274	23.1985	0.0134543	0.0454392	1.55065	PRCC
24.4754	24.9939	25.1228	25.4097	25.8389	26.1259	25.5188	25.7368	0.0134632	0.0454503	0.804636	NELFB
27.1026	27.4206	27.232	27.2087	27.08	26.8359	26.9125	26.9748	0.0134897	0.045468	-0.290174	SEC23A
26.5687	26.3169	26.3146	26.4912	27.0175	26.8941	26.6	26.7238	0.0136955	0.0456067	0.386014	MAGED2
25.6189	25.4855	25.5717	26.0714	26.9431	26.4037	26.277	26.1414	0.013761	0.0457438	0.754459	ACOT7
27.5453	27.2642	27.7326	27.4462	27.2128	27.047	27.1967	27.0454	0.0137727	0.0457674	-0.371602	THOC2
26.3369	26.3703	26.1923	26.5623	27.0805	27.1505	26.5876	26.752	0.0140424	0.0458618	0.527207	PDCD10
27.4197	27.4891	27.9966	27.9946	28.7736	28.5668	28.1092	28.3621	0.0138094	0.045864	0.727945	PSMD1
30.9229	31.2512	30.6126	30.2843	29.7074	30.0473	29.0183	29.9852	0.0138764	0.0458777	-1.07822	PGRMC1
24.3437	24.402	23.2968	23.984	24.9537	24.8227	24.8073	24.9719	0.0140606	0.0458785	0.882277	GET4
29.3048	29.385	29.9697	29.6833	30.6891	29.9776	31.0501	30.3829	0.0139333	0.0459208	0.939232	PCNA
22.3426	22.055	20.8763	24.3818	25.3255	24.9811	24.6034	24.949	0.01395	0.0459374	2.55081	AASDHPPT
28.4867	28.3419	28.0184	27.8921	27.5973	27.7554	27.6715	27.7473	0.0138372	0.0459536	-0.491858	NDUFS3
28.0047	27.7759	29.2535	29.0611	27.0371	26.6675	27.6352	26.2066	0.0140735	0.046	-1.63721	TOMM20
30.7769	30.6197	30.9602	30.6532	30.4187	30.4964	30.109	30.4127	0.0142081	0.0465205	-0.393327	DDX3X;DDX3Y
23.9426	24.0298	23.6956	23.3268	22.8514	22.9559	23.3203	23.2403	0.0145147	0.0472431	-0.656749	KIDINS220
28.338	28.8978	28.5335	28.8015	27.9285	28.4024	27.6928	27.8187	0.0145067	0.0473203	-0.682089	TRIP13
23.1284	23.8145	22.9202	23.7188	21.5646	19.7719	21.8399	22.3107	0.0146641	0.0473344	-2.02369	PTPRF
24.7181	24.4993	22.9452	24.8428	22.6017	22.3764	20.8294	22.7312	0.0146312	0.0473971	-2.11665	MARC2
30.5921	30.6519	30.9847	31.3496	31.6811	31.5521	31.4521	31.4028	0.0146602	0.047411	0.62744	CCT2
27.4184	27.162	27.5754	27.2593	26.7491	26.8674	25.6876	26.258	0.0146044	0.047474	-0.963245	FLOT1
25.0566	24.6418	25.4025	25.0368	26.0627	25.7481	25.4145	25.6903	0.0145939	0.0475512	0.694467	MPP6
27.4605	27.2008	27.6086	27.5235	27.6576	27.899	27.8814	27.7705	0.0145889	0.0476287	0.353765	USP7
27.2246	27.2787	27.7358	27.66	28.0423	27.8625	28.1924	27.8633	0.0149195	0.0478652	0.515335	COPS2
28.4337	28.5288	28.285	29.1142	29.812	29.1369	29.2562	29.3272	0.0148503	0.047929	0.792649	EIF3J
27.5653	27.5916	27.531	27.4969	27.3821	27.2092	27.4572	27.3764	0.0149118	0.0479421	-0.189966	SCAMP3
26.5638	26.5542	26.9256	27.0438	26.0894	26.2397	26.5075	26.1452	0.0148947	0.0480193	-0.526372	NUP35
25.1886	25.2178	26.4228	25.5937	23.7691	24.8334	22.988	24.2846	0.0151535	0.0484019	-1.63694	NAPG
26.2687	26.0554	26.7038	26.3367	26.8552	26.9037	27.462	26.847	0.0151654	0.0484268	0.675795	GRWD1
26.9534	27.1262	27.4935	27.0812	27.8455	27.6921	27.7943	27.3935	0.0151074	0.0484792	0.517769	UCHL5
30.2889	30.0559	29.7757	30.6285	31.0266	30.7742	31.0166	30.658	0.0151035	0.0485568	0.68159	HNRNPDL
25.1063	24.5958	25.1404	24.6844	25.6382	25.2932	25.5986	25.2869	0.015072	0.0486346	0.572508	ECE1
28.5863	28.3235	28.5578	28.8637	29.2573	29.0735	29.1064	28.8191	0.0152098	0.0487313	0.481222	ETF1
26.0277	26.8796	26.9166	26.604	25.2541	25.3158	25.1536	26.2675	0.0152657	0.0488952	-1.10918	AP2M1
23.073	23.137	23.5444	23.6419	24.0577	23.8162	23.8587	23.765	0.0153318	0.0491474	0.525329	CHMP1A
26.0552	25.9659	26.312	26.5763	27.3722	26.7834	27.3371	26.605	0.0154325	0.0492472	0.797077	PGLS
29.6636	29.1916	29.4552	29.6218	30.1189	30.0716	29.767	29.8275	0.0154011	0.0493144	0.463208	XPO1
22.2711	23.7196	23.8375	22.5854	21.8916	21.5717	20.7598	21.8371	0.0154323	0.0493249	-1.58836	TYSND1
20.7189	20.9677	20.9068	21.4882	22.2769	21.9828	22.2825	21.3118	0.0153977	0.0493924	0.943103	IRF2BP1
26.8964	26.7013	26.9049	26.7235	27.0487	27.0889	27.01	26.9333	0.0154904	0.0494214	0.213668	CNOT1
20.0854	19.6177	20.6472	20.7245	22.9921	21.971	22.173	20.8329	0.0155116	0.0494671	1.72353	BCAR1
26.9738	26.9988	27.1718	27.3709	27.6934	27.4243	28.2028	27.6945	0.0155033	0.0495447	0.624935	CALD1
26.0324	26.1213	26.2123	26.3726	26.7559	26.5869	26.3699	26.485	0.015734	0.0510297	0.364821	HN1
21.3838	21.2332	21.5306	20.6996	19.9233	20.6077	20.6022	19.6245	0.0157569	0.0511375	-1.02238	P4HTM
26.8241	27.0438	27.1719	27.1854	27.4598	27.4986	27.7106	27.2455	0.0158115	0.0512137	0.422333	ATP6V0D1
28.0018	27.8217	28.3421	28.805	29.3051	28.8794	29.0807	28.8801	0.015947	0.0522243	0.793682	HPRT1
23.5128	23.3915	24.7564	24.1423	22.7948	21.5502	20.8995	22.8811	0.0159817	0.0522675	-1.91933	STAM2
23.5491	22.2814	20.9491	22.2701	25.5576	24.1831	23.6475	26.1782	0.0160218	0.0524286	2.62914	MTG2
27.3778	27.3936	27.596	27.4335	28.0091	27.8848	27.5516	27.7977	0.0161431	0.0525209	0.360562	TPP2
23.2587	23.5788	23.2423	23.1369	23.0122	23.0223	22.6345	22.6852	0.0163244	0.0530836	-0.465647	STAU1
21.7226	22.1371	22.3666	22.5066	19.8071	21.5431	20.8148	21.1612	0.0164723	0.0531877	-1.3517	SQLE
20.7773	20.9704	21.4426	21.4271	19.5499	20.3498	20.3821	20.5939	0.0164492	0.0532531	-0.93543	NAGLU
25.7761	26.1444	26.3174	26.2545	27.1646	26.8409	26.499	26.5571	0.0164666	0.0532696	0.642264	UBR4
23.8627	23.8582	23.4372	24.2758	22.3999	23.1395	22.928	23.3884	0.0164177	0.0533354	-0.894526	SURF1
27.6883	27.6781	27.6628	27.4061	28.3316	27.9653	27.9122	27.8745	0.0165727	0.053745	0.412076	RRP1
22.165	21.9285	21.7136	22.5199	22.4873	22.8257	22.7504	22.7317	0.0166414	0.0539571	0.617035	SUGP1
22.9765	23.0073	23.0583	22.9068	23.1622	23.2757	23.3475	23.0697	0.0167657	0.0543277	0.226562	CNOT10
25.9677	25.8236	25.8343	25.7813	26.4016	26.1693	26.0897	25.9975	0.016846	0.0544465	0.312796	DHX37
23.2872	22.39	23.0415	23.5066	21.7128	21.5514	19.0937	21.2566	0.0168613	0.0544611	-2.15276	RQCD1
24.6227	24.5907	24.1323	24.5476	25.7227	25.3182	25.5595	24.6689	0.0171165	0.0551159	0.844018	AMPD2
27.7742	28.0486	28.65	28.5212	29.0616	28.8426	29.1635	28.8142	0.0171416	0.0551246	0.721991	LTA4H
25.8596	25.6944	25.8692	25.8085	26.0508	26.1872	25.8945	26.039	0.0172081	0.0551394	0.234947	ZC3H15
31.5773	31.8476	32.2171	32.1316	32.4366	32.4318	32.6794	32.3443	0.017141	0.0552085	0.529598	TKT
23.8972	24.8124	26.3901	23.235	21.7927	22.7098	21.3732	22.5986	0.0171769	0.0552231	-2.46512	RABL3
27.6247	28.0187	28.1042	28.652	29.3265	29.1175	28.8676	28.5692	0.0173319	0.0556325	0.870295	S100A13
27.0339	27.3558	27.1959	26.5418	26.2786	25.975	25.5604	26.6096	0.0173291	0.0557164	-0.925934	GLG1
31.5247	31.4507	31.0839	31.4228	31.7357	31.6203	31.774	31.6976	0.0173165	0.0558006	0.336368	NONO
27.245	25.7442	27.1194	26.9669	28.3443	27.9114	27.9053	27.7344	0.017302	0.055885	1.20498	ATXN2L
28.0783	27.9635	26.6946	27.2278	26.4606	26.3684	25.7475	26.5472	0.01754	0.0561854	-1.21014	HLA-C
26.1268	26.1346	25.8471	26.7789	27.3421	26.7402	27.2077	26.806	0.017438	0.0562045	0.802114	IPO9
24.2332	24.5364	24.5642	24.6063	25.4012	25.298	24.7479	24.8571	0.017534	0.0562695	0.591044	IST1
25.8184	25.3885	26.3713	26.2887	27.7453	26.5432	27.1503	26.8698	0.0175308	0.0563538	1.11045	TBL1XR1
23.6218	23.3803	22.8775	25.6051	26.0596	25.7809	26.1163	25.5121	0.0174896	0.0563844	1.99605	ATAD2B
25.7788	25.451	25.607	25.4398	26.1905	26.3989	25.6856	26.2844	0.0177562	0.0564018	0.570692	POLD1
28.3661	28.3451	28.5778	28.9164	29.3964	28.8716	29.5653	29.048	0.0177212	0.0564332	0.668978	RANBP1
26.8208	26.552	26.1648	25.982	25.1029	25.2893	24.2077	25.8564	0.0176956	0.0564577	-1.26582	PON2
28.7322	28.5964	28.2087	28.6797	29.2508	29.1579	29.2756	28.7461	0.0177458	0.0564852	0.553323	SRP9
27.2705	26.9981	27.9504	27.0834	26.0011	25.0515	25.3354	26.9003	0.0176947	0.0565417	-1.50354	BCS1L
28.3025	28.287	28.5386	29.1791	29.3859	29.1523	29.6186	29.1913	0.017681	0.0565425	0.760237	PSMC5
26.5848	26.2687	27.134	27.0872	28.4173	27.6498	27.7917	27.2864	0.0177382	0.0565689	1.01763	PDCD5
24.0198	24.0354	23.5982	23.2869	21.7767	22.4587	19.8064	22.4487	0.0176419	0.0566269	-2.11244	PNPLA6
24.9578	24.6476	25.2282	25.1869	25.8899	25.7751	25.484	25.3071	0.0178768	0.056885	0.608908	PAPOLA
24.9457	24.5097	24.9032	25.409	25.4274	25.4961	25.7261	25.6608	0.0178976	0.0569543	0.635684	IPO4
30.1085	30.013	30.3098	29.9428	29.7057	29.4333	29.2704	29.8944	0.0179187	0.0569647	-0.517578	RAP1B
30.3497	30.4705	30.8041	30.8256	31.3103	31.0991	31.0216	30.9073	0.0181296	0.0574173	0.472078	AHCY
25.6626	25.569	24.9131	25.7537	25.0408	24.6449	24.7938	24.7254	0.018161	0.0574211	-0.67336	COX6B1
27.0421	26.9594	27.3122	27.6094	28.3619	27.8152	28.478	27.596	0.0181023	0.0575015	0.831987	USP5
27.5061	27.5353	28.4054	27.8946	28.7028	28.6442	28.5334	28.3455	0.0180891	0.0575037	0.721132	PSMB5
25.5304	25.5395	25.7232	25.7886	26.693	25.7963	26.4706	26.2276	0.0183061	0.0579854	0.651439	LANCL1
30.6883	30.737	30.227	30.0948	29.6063	30.0021	29.3754	29.9489	0.0184164	0.0581543	-0.703613	ETFA
26.6995	26.9138	26.3546	26.2121	25.3976	24.9081	23.0611	25.3968	0.0184099	0.0581633	-1.85407	MAN2A1
23.1373	23.2636	23.2392	22.9278	24.0395	24.6054	23.5026	23.6833	0.0185511	0.0582493	0.815717	BCR
26.9496	26.8471	27.2542	26.7547	26.5612	26.6938	26.2471	26.4616	0.018484	0.0583256	-0.460468	IK
25.0786	25.3672	24.9531	25.7221	25.9878	25.8185	25.7551	25.8385	0.0185222	0.0583338	0.569716	UCHL3
29.7279	29.8101	29.8972	30.3818	30.6583	30.422	30.3976	30.3879	0.0186275	0.0584023	0.512207	IPO5
27.9303	28.2851	29.1215	28.4	29.5326	29.2977	29.3	29.0466	0.0186547	0.0585166	0.859982	ASNS
25.763	25.5098	26.3314	26.2168	26.4025	26.7474	27.0853	26.6444	0.018642	0.0586012	0.764651	UGDH
24.4906	25.1791	25.2279	25.5888	25.5639	26.1531	26.0646	26.137	0.0187387	0.0590144	0.858062	WRNIP1
30.7097	30.7123	30.0504	29.7879	29.5394	29.3212	28.174	29.2891	0.0188213	0.0592403	-1.23413	SDHA
28.1305	28.6172	28.2127	28.4538	28.8434	28.689	29.0638	28.6623	0.0188787	0.0593218	0.461073	NQO1
26.0105	25.6544	25.9843	25.641	25.1822	25.5592	25.0604	24.5595	0.0189219	0.0594835	-0.732226	DNAJC10
25.7146	26.1972	26.1809	26.1445	20.2559	25.7676	20.1586	19.7341	0.0189855	0.0595702	-4.58027	CEBPB
26.4526	26.9458	26.8608	26.6572	25.5445	26.3174	24.6242	25.7409	0.0190109	0.0595994	-1.17235	NOL10
28.4633	28.4097	28.9342	29.089	29.9858	29.2584	29.6648	29.1831	0.0194098	0.0599887	0.798951	PPA1
28.537	28.3074	28.3263	28.0344	28.864	29.063	28.4575	28.9198	0.0194096	0.0600738	0.524791	IGF2BP1
29.9484	29.9661	30.8398	30.8744	31.6353	31.1788	31.7367	31.0284	0.0193627	0.0600739	0.987648	ANP32A
25.8432	26.4783	26.4653	25.9541	26.7946	26.7674	27.0365	26.5777	0.0191793	0.0601143	0.608836	CBX1
28.5149	28.9171	29.179	29.2156	30.0238	29.7114	30.0966	29.2267	0.0194786	0.0601301	0.80798	RAD23B
27.8428	27.745	28.0928	27.8466	28.1392	28.1186	28.1477	28.0808	0.019343	0.0601593	0.239783	UBTF
29.9747	30.1926	30.4563	30.4214	29.1984	29.8669	29.7626	29.7985	0.0192715	0.0601655	-0.604674	HNRNPA3
23.9679	23.5228	24.5862	24.525	25.8196	24.8347	25.7641	24.8713	0.0193417	0.060245	1.17197	LUZP1
26.9358	26.5608	27.1403	26.7384	26.2429	26.321	25.0585	25.8106	0.0203831	0.0608821	-0.985573	GGT1;GGT2;GGT3P
21.7425	21.8092	21.0141	19.1537	23.6249	22.8564	22.7551	22.6975	0.0202549	0.0608914	2.05361	HSPB8
32.0402	32.1677	32.4557	32.3778	31.6454	31.6391	32.1422	31.6562	0.0202445	0.0609372	-0.48967	PHB
28.7534	28.9493	29.6491	29.1824	30.0866	29.5053	30.0383	29.8513	0.0197372	0.0609661	0.736828	FSCN1
33.5125	33.4671	33.2579	33.6824	34.4098	33.9214	33.9743	33.7254	0.0203631	0.0609667	0.527773	GAPDH
28.6081	28.5119	28.7911	28.6877	29.2351	29.147	28.8587	28.8301	0.020506	0.0610139	0.367999	DDX27
21.4231	20.1107	20.6358	19.0372	22.2699	21.9041	21.6754	21.8271	0.0202176	0.0610223	1.61742	DCTN4
23.6269	24.5719	24.7283	24.0917	23.5343	23.1177	23.5711	23.406	0.0199993	0.0610225	-0.847397	YY1
23.3681	21.9115	21.0753	23.5097	24.1438	24.172	24.6666	24.4502	0.0198124	0.0610494	1.892	TLE3;TLE2;TLE1;TLE4
31.201	31.2473	31.1258	31.1362	30.9119	31.0845	30.7231	30.9762	0.0203012	0.0610515	-0.253662	PRPF8
23.9209	25.4421	21.6181	24.0762	20.6078	21.5424	21.5886	20.8802	0.0199117	0.0610535	-2.60957	GNL3L
27.9739	27.9536	27.884	27.4901	27.3351	27.5895	27.1999	26.9233	0.0199713	0.0610689	-0.563458	IKBIP
25.7738	25.9599	26.0648	26.7529	26.9278	26.7824	27.065	26.6686	0.0201121	0.0611052	0.723091	ATP6V1B2
26.508	26.5314	25.6025	25.9767	27.245	26.9626	26.6776	26.9033	0.0202032	0.0611077	0.792468	EHD1
21.9507	19.8925	20.5821	21.4442	22.4531	22.8223	21.994	22.8616	0.0201253	0.0611092	1.56538	MTERF1
27.9478	28.1108	28.0748	27.8459	27.4914	27.8001	27.0945	27.5963	0.0206868	0.0615138	-0.499264	WDR3
19.9002	21.6983	21.6054	22.6867	23.465	22.9704	24.7047	23.3534	0.0206295	0.0615436	2.15073	NXN
23.2027	22.0161	22.5547	22.8444	23.8279	23.4025	24.0377	23.2342	0.0207751	0.0615791	0.971086	CDK13;CDK12
26.8321	27.231	27.4212	26.6652	26.6072	26.4059	25.6588	26.1175	0.0207533	0.0616607	-0.84	MRPL49
24.8128	24.8581	25.619	25.2686	25.8362	25.7278	25.8224	25.618	0.0207735	0.0616639	0.611481	DUSP3
25.1513	25.0439	25.1096	23.4773	26.7123	25.9212	26.0193	25.7949	0.0208744	0.0618681	1.41639	CBX8
27.9611	27.8919	28.1807	28.3355	27.7473	27.5171	27.8869	27.5059	0.0208831	0.061882	-0.428021	CLU
23.2564	23.185	23.0503	23.4297	23.7933	23.9173	23.3423	23.6899	0.020974	0.0620958	0.455369	GAK
25.3661	25.5208	25.1057	25.8738	24.7478	25.0291	24.2872	24.9394	0.0209521	0.0621808	-0.715714	VPS13A
20.4307	22.0664	22.0433	21.2949	22.5336	23.6464	22.4509	23.0995	0.0212909	0.0629264	1.47374	TFAP2D;TFAP2A;TFAP2E;TFAP2C;TFAP2B
22.1231	21.9991	22.402	22.7166	21.0871	21.9135	20.7827	21.675	0.0211902	0.0629344	-0.945646	CNOT6
28.5583	28.9515	28.6548	29.0005	28.3951	28.0642	28.5592	27.9659	0.0214603	0.0629756	-0.545201	SCP2
24.4364	25.4286	25.4584	25.4019	24.193	23.4763	23.7588	24.7321	0.02148	0.0630041	-1.1413	RBMXL1
32.9765	33.1644	33.2541	33.2136	33.9935	33.4507	33.7507	33.3577	0.0215315	0.0630054	0.485995	PRDX1
22.474	23.7432	23.2116	23.1929	22.5285	22.2318	21.3094	22.0074	0.0214058	0.0630068	-1.13616	PPAP2C
23.3889	23.7346	23.7963	23.9609	22.8368	22.8804	23.3964	23.3699	0.0212672	0.0630123	-0.599333	CLK3
26.6321	26.3073	26.2597	26.497	27.022	27.0034	27.2869	26.5511	0.0213857	0.0630435	0.541818	FLII
28.5125	28.7753	28.4335	28.4617	28.9786	29.1486	28.6548	29.019	0.0213851	0.0631293	0.404512	SBDS
27.633	27.122	28.4464	28.0222	28.6512	28.7113	29.5231	28.6807	0.0215817	0.0632605	1.08568	ANP32B
22.2817	22.0733	21.0063	22.233	22.8249	23.7595	23.0608	22.6781	0.0218053	0.0634393	1.18227	EP300;CREBBP
26.6165	26.8758	27.1991	26.9289	27.6824	27.4495	27.3461	27.1487	0.0217913	0.0634706	0.501603	SNX2
30.1147	29.9204	30.1422	30.2464	30.4699	30.5663	30.3364	30.2512	0.0217579	0.0635556	0.300013	EPPK1
27.7553	27.8579	28.386	28.3289	28.9354	28.6726	28.5103	28.5298	0.0216869	0.0636231	0.579988	ATIC
24.2533	24.5315	24.8496	24.4847	25.3143	24.872	25.6634	24.9614	0.0216705	0.063628	0.672996	PYGB
30.1524	30.3025	30.6779	30.6233	31.2089	30.9491	31.0256	30.6631	0.0217553	0.0636408	0.522646	UBA1
22.9068	23.0288	23.5321	23.4187	23.8795	23.9183	24.4867	23.5771	0.0218905	0.0636485	0.743829	TPM1
21.1543	21.7596	21.7859	19.7763	24.5208	23.1275	23.5043	21.9825	0.0218637	0.06368	2.16477	GLRX
23.2011	23.4352	22.9163	23.8037	23.7589	23.9676	24.4322	24.0869	0.0217509	0.0637262	0.722345	BRAT1
21.7161	22.1168	22.7479	21.8868	22.8355	22.5873	23.397	23.4481	0.0219545	0.0637606	0.950088	FOXP1
25.8295	25.8819	25.8889	26.0419	26.7958	26.1794	26.6627	26.1378	0.0217388	0.0638118	0.533362	NLE1
23.5374	23.8038	23.2989	23.9183	24.6781	24.379	24.4692	23.8294	0.0220594	0.0641753	0.699328	RANBP3
23.7601	23.7666	23.7111	23.3739	24.1873	24.4717	23.8093	24.1657	0.0220908	0.0642702	0.50557	ZMYM3
24.6321	24.7389	24.0476	24.0339	22.8756	23.4315	20.6827	22.7338	0.0220763	0.0643554	-1.93223	MGAT1
24.072	24.0523	24.9496	24.1592	23.1808	22.9735	24.0101	23.2403	0.0221909	0.0644444	-0.957088	CDYL
27.1596	27.7949	27.8339	27.2144	28.1883	28.284	27.972	27.9738	0.0224631	0.0651926	0.603808	MESDC2
27.0434	26.6373	26.9825	27.0859	27.9098	27.4672	27.8599	27.112	0.0224456	0.0652417	0.649936	PRRC2C
28.0816	28.0542	27.7127	28.0423	28.5975	28.4875	28.0913	28.4127	0.0226108	0.0653509	0.424562	CUL4A
24.0689	23.9186	22.0025	22.4913	21.6708	21.5822	21.3052	21.5733	0.0225979	0.0653579	-1.58749	ST3GAL4
27.4177	27.4328	27.4356	27.3043	27.1609	27.2113	26.6431	26.959	0.0226515	0.0653596	-0.404045	BMS1
23.9613	24.3507	23.5024	24.3872	23.0137	23.5249	23.4595	23.3337	0.0226922	0.0653893	-0.717434	PDCL
24.3705	24.2505	25.1117	24.8183	25.4679	25.7083	25.7272	24.9445	0.0225654	0.065444	0.824254	MLH1
25.4575	25.7493	25.8742	25.9985	26.954	26.5003	26.7861	25.923	0.0230125	0.0657807	0.770973	BLVRA
24.7771	24.6787	25.6921	25.3885	26.2713	26.0719	25.7275	25.7925	0.0230092	0.0658667	0.831671	DCTPP1
24.5856	24.3769	21.6725	23.0822	21.3702	21.7575	21.2282	20.9256	0.022991	0.0658796	-2.10893	RAB5B
24.6125	24.5647	25.2461	25.7119	25.6558	26.1356	26.3667	25.8198	0.023092	0.0660652	0.960663	DNM1L
23.6758	24.1076	24.201	23.6138	21.7223	21.7241	22.249	23.7746	0.0234204	0.0664955	-1.53209	CWC15
31.6174	31.342	31.1877	31.5483	31.8152	31.8518	31.6474	31.7012	0.0232577	0.0665313	0.330066	RPLP0;RPLP0P6
27.1555	25.9619	26.9243	27.2389	23.9972	25.4568	25.4066	26.0582	0.0233375	0.0665818	-1.59041	RAP1A
23.107	22.3912	23.1194	23.9003	25.2636	24.2567	24.4689	23.7908	0.0233337	0.0666008	1.31551	USP47
26.3103	26.0478	26.2005	25.9862	25.5081	25.3341	23.9036	25.267	0.0239082	0.066841	-1.13298	C21orf33
30.6835	30.7351	30.5983	30.4995	30.2281	30.4068	29.4817	29.877	0.0242525	0.0668564	-0.630722	H2AFY
24.7447	25.2078	25.2843	25.6716	26.3984	25.7806	26.4262	25.6456	0.0240819	0.0668724	0.835557	TES
23.4817	23.8271	23.6097	23.7908	25.0865	24.3115	25.3187	23.9583	0.023903	0.0669268	0.991398	SUZ12
27.7119	27.454	26.6506	26.467	26.0556	25.9506	24.8845	26.2362	0.0239703	0.0669398	-1.28917	METTL7A
24.1431	24.5744	24.7752	25.2893	25.5724	25.5932	25.2284	25.4112	0.0242057	0.0669415	0.75577	DUSP12
27.7628	27.6796	28.4748	28.3317	28.8595	28.8796	28.6863	28.4734	0.0240464	0.0669579	0.662498	PSMD11
27.7168	27.5835	27.8771	28.4235	28.896	28.3581	28.7797	28.3618	0.0234872	0.0669948	0.698664	SFN
25.408	25.5895	24.623	23.308	23.0885	23.1149	21.8211	23.383	0.023889	0.0670129	-1.88025	PREB
28.3676	28.5292	28.4086	27.8724	28.0097	27.6995	27.4591	27.8001	0.0241966	0.0670268	-0.552344	GRPEL1
24.1337	24.1843	24.3047	23.6007	23.1969	23.2723	21.6556	23.1078	0.024026	0.0670435	-1.2477	CCNT1
21.1617	21.0518	21.1699	21.235	20.9799	20.3908	20.8815	20.7591	0.0243065	0.0670914	-0.401734	VPS37C
26.4826	26.7744	26.4253	26.1241	26.0037	25.7611	24.9719	25.8616	0.0238721	0.0670991	-0.802016	AK3
27.0726	27.0471	26.5602	26.5068	26.1423	26.3973	25.123	25.6932	0.0237604	0.0671082	-0.957701	FAR1
22.8485	23.5077	22.809	22.8321	21.936	20.7279	22.6533	21.25	0.0237566	0.0671226	-1.35753	PEX13
25.5908	25.2927	26.2941	26.2639	26.7405	26.6004	26.6337	26.5201	0.0236485	0.067137	0.763331	CSRP1
27.3344	27.9402	27.6632	27.9686	27.1067	27.2109	26.846	27.4336	0.0235907	0.0671565	-0.577311	SDF4
26.9832	26.9202	27.1804	26.9979	28.0183	27.6837	27.6292	27.1043	0.0244151	0.0672294	0.588457	IDE
26.4744	26.3995	26.4958	26.9421	26.9755	26.9814	26.8509	27.0443	0.024931	0.0672645	0.38506	STAT1
23.896	23.0902	22.9519	23.0658	23.0238	21.8208	22.0289	21.9721	0.0249098	0.0672837	-1.03955	RAB20
26.0065	26.1134	26.0476	26.257	26.3623	26.6007	26.4674	26.1994	0.0245232	0.0672861	0.301337	GGH
22.4512	22.0008	21.4046	21.8681	22.6748	22.9181	22.4141	23.5215	0.0248936	0.0673333	0.950936	NUSAP1
26.3454	26.3631	26.6713	26.3247	25.9946	26.0839	25.8176	26.2882	0.0247757	0.0673477	-0.380043	THOC3
27.4657	27.3918	27.4527	27.6228	27.968	27.7589	28.3656	27.7084	0.02502	0.0675176	0.466972	CHERP
27.3375	27.327	27.1425	27.1335	27.6672	27.4502	27.7573	27.3563	0.0250116	0.0676025	0.322647	POLR2A
27.8337	27.7818	28.0881	28.2057	28.7971	28.4579	28.4012	28.1828	0.0250464	0.0676437	0.482444	ACTR3
24.1999	23.6306	22.2426	23.7387	21.3176	22.5033	20.173	22.0128	0.0251452	0.0676742	-1.9513	AGO2;AGO1;AGO3
25.7414	25.0052	25.4491	25.7639	26.033	26.1851	26.5943	25.8976	0.0253145	0.06827	0.687611	RHEB
26.0167	26.0499	26.6446	26.6163	27.3885	26.8902	26.7455	26.9277	0.0253093	0.0683204	0.656119	SEPT7
29.7347	29.68	29.5648	30.0664	31.2597	29.8622	30.8142	30.8049	0.0256417	0.0685622	0.923791	FABP5
21.8493	23.7079	23.7225	23.1662	21.5333	21.7111	21.2414	22.2243	0.0256245	0.0686476	-1.43397	KIAA0391
21.8649	21.7134	22.1297	22.0771	21.8399	20.6441	19.866	20.3302	0.0255473	0.0686642	-1.27618	FARP1
23.4161	23.1121	22.4206	24.5676	24.8354	24.6662	24.6416	24.6797	0.0256139	0.0687332	1.32666	COPS8
25.9685	26.5056	26.3429	26.33	25.4525	24.1279	24.4673	25.9441	0.0257021	0.068805	-1.28878	WDR43
26.4878	26.5258	26.883	26.6812	26.4829	26.2447	26.0777	26.3215	0.0257537	0.0688784	-0.362706	EIF4A2
30.8532	31.0163	31.2684	31.6392	31.66	31.7191	32.1965	31.7035	0.0258841	0.0695068	0.625525	RPLP2
28.9486	29.133	29.512	29.097	29.7654	29.6633	29.6424	29.36	0.0260047	0.0698168	0.43513	PSMA1
27.948	28.0716	26.8966	26.8033	26.0487	26.4706	24.7762	26.3739	0.0261874	0.0699901	-1.51252	FADS1
25.142	25.1321	25.2196	24.9728	24.5842	24.4884	23.109	24.2466	0.0261501	0.0700764	-1.00956	TCIRG1
25.9385	25.6695	25.83	26.2131	26.4336	26.2737	26.8081	26.2074	0.0261478	0.070163	0.517891	TP53BP1
24.1164	23.8056	24.1791	23.7901	24.1012	24.5519	24.4782	24.4327	0.0261445	0.0702497	0.418199	SPECC1
24.639	24.3536	23.9221	24.1469	26.0289	24.5971	25.141	25.1883	0.0264023	0.0702836	0.973429	OTUD6B
21.7406	21.5258	23.3822	22.8909	21.333	21.116	20.6382	20.9378	0.0264004	0.0703696	-1.37862	THADA
26.8983	26.7653	26.6183	26.7465	27.129	26.8767	27.1119	26.922	0.0263616	0.0703873	0.252751	CBS
21.4597	21.6433	21.4864	20.7012	22.2869	22.1437	21.7687	21.9073	0.0265871	0.070439	0.70398	TRMU
24.46	24.1416	24.4921	24.1052	25.267	25.0235	24.4791	24.7506	0.0265615	0.0704469	0.580334	PTGES3L-AARSD1;AARSD1
24.8276	24.4628	25.0747	25.4491	25.9305	25.6799	25.3117	25.766	0.0263515	0.0704736	0.718462	PPME1
29.8298	29.7263	28.774	28.866	28.5038	28.1872	27.692	28.6815	0.026319	0.0704963	-1.03289	ACO2
24.2753	24.8734	25.515	24.5743	25.8759	25.6452	25.3424	25.7563	0.0262947	0.0705092	0.845463	UBE2K
28.7626	28.3311	29.0563	29.2303	28.0914	28.2792	28.4436	27.9459	0.026771	0.0705937	-0.65508	SRP72
30.4247	30.4351	29.9803	29.9057	29.7493	29.8338	29.2081	29.6409	0.0267375	0.0706163	-0.578444	ATP5O
24.0352	23.9271	24.7839	24.9725	23.3711	23.6298	23.8921	23.5048	0.026938	0.0708571	-0.830231	TMOD1
27.9486	28.1047	28.9854	28.7746	29.3461	29.2374	29.3249	28.9887	0.0270365	0.0708827	0.770952	GMPS
25.6266	25.2289	25.9033	25.8013	27.1001	26.4949	26.4748	25.8758	0.0269286	0.070943	0.846374	PQBP1
28.4136	28.3333	28.6502	28.2525	28.9559	29.049	28.5526	28.7333	0.0269206	0.0710291	0.410279	BZW2
27.5627	27.4524	27.621	27.1738	28.2699	28.5048	27.6356	27.9146	0.0269161	0.0711154	0.62876	LRRC47
25.523	25.2596	26.1127	25.6478	26.0772	26.1426	26.5875	26.1993	0.0271897	0.0714058	0.61586	CDC123
26.8129	26.8536	27.0096	26.5263	26.5447	26.3837	25.6061	25.8366	0.0272144	0.0714837	-0.707804	NOC3L
22.279	22.4401	23.4491	21.7677	21.3846	20.9383	20.3856	21.8133	0.0272728	0.0715422	-1.35351	CYBA
22.805	21.3202	22.4617	19.8233	24.4256	23.5318	24.2761	22.9391	0.027432	0.071793	2.19062	UBE2C
25.1642	25.3349	25.3975	25.7247	25.6921	25.8551	25.7859	25.7129	0.0275238	0.0718317	0.356185	POLR2L
26.1444	26.1206	27.0083	26.9098	27.5079	27.3541	27.1581	27.1218	0.0276495	0.071957	0.739672	ADK
26.2095	25.7297	25.7352	25.4642	27.0377	26.962	26.0244	26.4148	0.0276172	0.0720096	0.825044	POP1
25.5325	24.5011	23.8409	26.2699	23.3843	23.5503	23.632	22.1242	0.0276135	0.0720335	-1.86341	TIMM23;TIMM23B
27.3128	27.5012	28.0563	27.6978	28.2562	28.1607	27.9744	28.1367	0.0275628	0.0720672	0.48998	WDR1
26.6846	26.8317	27.3133	27.3438	27.5365	27.6889	27.9886	27.394	0.0275917	0.0721199	0.608644	COPS4
26.4678	26.4151	26.6278	26.0342	27.5873	26.5999	26.9938	27.1297	0.0277423	0.0723246	0.691419	ELAC2
27.9728	27.8014	27.5881	27.4292	27.5245	27.2549	26.9738	26.9211	0.0278583	0.0726961	-0.52935	ECI2
26.7944	26.7851	26.1617	25.8064	25.6547	25.743	24.9036	25.6455	0.0280174	0.073381	-0.900176	ESYT2
23.4984	24.5365	24.536	24.2249	24.9331	24.8893	24.8653	24.9317	0.0281603	0.0736295	0.705914	THG1L
28.2308	27.7521	28.3825	28.325	28.791	28.6361	28.7264	28.4264	0.0281322	0.0736457	0.472378	LIMA1
32.5961	32.5649	32.7366	32.6696	32.8971	32.8148	33.2777	32.8691	0.028415	0.0741135	0.322919	HNRNPK
31.8917	31.4886	31.3072	31.6854	32.1723	32.0365	31.9448	31.8592	0.0282673	0.0741779	0.410002	PABPC1;PABPC3
25.3299	24.8948	24.4903	24.5062	24.1446	23.5828	22.1099	23.7745	0.0284115	0.0742012	-1.40236	STEAP3
26.6798	26.3681	26.6638	26.5708	26.9309	27.1322	27.4989	26.7465	0.0283565	0.0742891	0.506502	SMARCD1
27.3264	27.6198	27.4984	26.5689	26.0954	26.8198	25.688	26.5006	0.0284609	0.0743093	-0.977414	NDUFS5
23.7394	23.7573	23.787	23.3437	20.6016	21.9508	23.2258	22.4256	0.0285142	0.0744292	-1.6059	VAC14
25.6313	25.5326	25.3129	25.324	26.5753	26.182	25.568	26.0237	0.0287753	0.0748766	0.637062	MRPL28
28.5699	28.7145	29.212	29.0467	29.5945	29.4908	29.3564	29.1359	0.0287355	0.0749647	0.508596	CAND1
26.3229	26.7279	27.0691	27.1979	27.7489	27.2615	27.6741	27.2981	0.0287033	0.074987	0.666208	EEF1E1;EEF1E1-BLOC1S5
25.0036	25.861	26.0872	26.2771	26.8292	27.024	26.7362	26.299	0.0288852	0.0750012	0.914874	DCTN2
25.512	25.3526	24.8687	24.9891	25.9769	25.8828	26.2332	25.3547	0.0288823	0.0750892	0.681348	KIF22
24.4055	24.3625	24.7202	23.8352	25.4678	24.6554	25.1786	24.9131	0.0289882	0.0751064	0.722886	ASF1A
26.2868	25.9211	25.5409	26.0305	26.3551	26.3269	26.6061	26.3999	0.0290911	0.0751121	0.477185	CTR9
26.7667	26.757	27.2376	26.6536	27.2371	27.3872	27.2309	27.1525	0.0289457	0.0751522	0.398172	HUWE1
23.155	22.9749	23.9515	24.0715	22.1618	23.0428	21.7067	22.6599	0.0291502	0.0752392	-1.14545	ABHD14B
29.9948	29.8932	30.0819	29.8271	30.5	30.6645	30.0492	30.2528	0.0293133	0.0754825	0.417365	BZW1
24.1813	25.5279	25.4084	25.7187	23.8775	24.2886	24.2384	24.3023	0.0293362	0.0755017	-1.03234	RCN2
24.9533	25.1631	25.3539	24.9872	25.4982	25.5542	26.0175	25.3433	0.0293836	0.075693	0.488931	ARFIP2
27.035	27.3498	27.338	26.5423	25.9783	26.0753	26.6902	26.5744	0.0295806	0.0759304	-0.736706	ACSL4
23.5883	23.3644	23.8029	23.633	18.3744	19.6995	21.9622	22.781	0.029477	0.0759489	-2.89291	MRPL10
23.6221	23.306	23.1999	23.6494	22.4535	21.7663	23.0621	22.9313	0.0296729	0.076241	-0.891074	SNX9
26.5711	26.3019	26.9694	26.9072	27.7662	27.1256	27.5397	26.9999	0.0298215	0.0763889	0.670459	CPNE3
27.7056	26.6839	26.9285	27.2547	25.5127	26.7819	23.9667	25.3364	0.0300897	0.0764414	-1.74375	DSG2
25.4744	26.4429	25.8923	25.4924	26.3998	26.4345	26.4481	26.7029	0.0302736	0.0764983	0.670812	CHMP4B
29.5202	30.1197	30.1417	29.6375	29.4671	29.1193	29.501	28.9318	0.0300266	0.0765293	-0.599977	COX5A
28.5935	28.6094	28.5172	28.9168	28.4257	28.48	28.1308	28.2549	0.0301283	0.0765557	-0.336414	SKIV2L2
23.0687	23.0128	24.8007	23.2398	22.8065	21.7008	22.2518	21.7002	0.0302716	0.0765858	-1.41567	HAGH
27.4354	27.5953	28.2444	27.8822	28.6015	28.1369	28.6424	28.2459	0.0299286	0.0766012	0.61735	PSMB2
29.3108	29.4181	28.6533	28.6858	28.6543	28.3995	28.1966	28.2617	0.0300131	0.0766175	-0.639005	ECH1
32.5879	32.5431	32.3163	32.3996	32.9725	32.8321	32.6421	32.603	0.0303398	0.076621	0.300725	DDX5
25.8191	26.0687	26.388	26.6828	27.1918	26.6503	27.1507	26.6687	0.0302203	0.0766735	0.675759	TRMT112
24.651	20.2339	22.9015	23.1897	25.2749	25.4103	24.9536	26.1135	0.0299785	0.0766736	2.69407	RSRC1
29.6229	29.7218	29.8557	30.1009	29.2537	29.6541	29.4081	29.4824	0.0299649	0.0766928	-0.375738	C1QBP
26.7428	26.2856	25.6628	25.5585	23.7939	23.7315	20.951	25.2162	0.0302144	0.0767615	-2.63928	NDUFS4
25.2299	25.1729	25.3452	25.5511	24.8468	24.9832	25.2199	24.7194	0.0304867	0.0771572	-0.382432	EMC2
24.7204	25.0941	24.1785	24.0968	22.2188	22.3924	21.5148	24.428	0.0304701	0.0771722	-1.88399	ELOVL1
26.8693	25.9412	27.1059	27.3604	28.3579	27.5972	28.0266	27.4662	0.0306111	0.0775791	1.04278	ZNF207
22.2312	22.7228	21.8403	23.0693	23.6296	23.4091	23.3508	22.9295	0.0307174	0.0778136	0.86388	STK39
26.8694	26.9655	27.437	27.0422	28.5063	27.9257	27.2385	27.8753	0.0307535	0.0779296	0.807944	PFDN1
25.1568	24.7148	25.6816	25.0861	25.7871	25.8713	25.8998	25.5188	0.0309512	0.0782877	0.609407	DDX31
28.856	29.0868	28.2566	28.0903	27.8225	27.4991	26.3823	27.8677	0.0309	0.0783356	-1.17953	LMAN1
25.6138	25.8535	24.8956	25.0134	24.9618	24.3746	23.3681	24.1544	0.0310058	0.0783937	-1.12936	MRPL54
23.0237	22.8261	22.6568	22.7034	20.8407	22.5107	21.1416	22.1562	0.03118	0.0789017	-1.14019	ZADH2
27.6955	28.3074	28.15	27.4448	27.5774	27.3126	26.8006	26.8599	0.0314222	0.0794628	-0.761795	UQCRFS1;UQCRFS1P1
30.2123	30.4165	30.0589	29.2248	29.0588	29.3486	28.7114	29.3901	0.0316086	0.0796937	-0.850916	ACAT1
30.0134	29.9175	30.1225	30.1247	29.614	29.9197	29.6013	29.9093	0.0315693	0.0797384	-0.283486	AP2B1
22.1197	21.7572	21.3416	21.2128	21.0509	19.9933	19.4259	20.986	0.0316412	0.079784	-1.24379	GATB;PET112
28.6752	28.4978	28.0233	27.9253	27.7258	27.6958	27.1378	27.8644	0.0317857	0.080157	-0.674424	MOGS
24.025	20.7856	25.2773	24.9909	21.5813	20.3741	20.4495	20.7911	0.0317648	0.0801796	-2.97073	MLIP
29.2176	29.2915	28.6873	29.6056	28.9058	28.536	28.2194	28.499	0.0317443	0.0802112	-0.66044	FKBP10
27.1966	27.2554	26.9436	27.2414	27.0569	26.5932	26.8838	26.5993	0.0318445	0.0803225	-0.375916	CTNND1
22.3634	22.642	20.2597	22.1596	23.1039	23.8226	23.2681	23.4985	0.0319003	0.0803352	1.56709	TRIM26
22.4561	21.6392	19.8375	21.9167	23.0184	23.2561	22.8376	23.1316	0.031882	0.0804251	1.59857	CXorf56
25.2922	24.0793	23.9809	26.0939	26.7676	26.1969	26.5236	25.9494	0.031936	0.080442	1.49779	DPP3
22.037	22.6712	23.0314	22.1779	21.8943	21.7651	21.8361	21.8599	0.0320084	0.080553	-0.6405	TTC37
22.5541	22.3039	22.9716	22.3777	21.8893	22.238	22.179	22.0267	0.0321764	0.0808044	-0.468596	POLR3F
23.8051	24.1883	24.8499	24.7892	25.1575	25.0742	25.2899	24.9831	0.0321982	0.0808479	0.718056	OGFR
22.1208	21.2964	19.9134	20.2341	23.7176	23.1369	24.7619	21.4559	0.0321756	0.0808943	2.37691	ATXN7L3B
26.4485	26.2358	25.9913	25.6367	25.2095	22.2753	24.3563	24.8925	0.0321753	0.0809131	-1.89469	OSBPL8
27.3873	27.2589	28.1796	27.9029	28.3379	28.2802	28.1515	28.4679	0.032303	0.0811251	0.627206	UBE2M
24.9795	24.8801	21.8811	19.0004	26.2067	27.0369	27.5359	26.1734	0.0322896	0.0812151	4.05296	TP53RK
20.5496	20.1273	19.0036	22.2689	24.1433	24.2732	22.1598	21.7794	0.0325131	0.0812685	2.60158	UBE2O
23.2778	23.3023	23.668	23.2891	24.4474	24.3171	23.3921	24.2262	0.0324958	0.0812965	0.71138	GNL1
22.5223	22.4095	22.2227	22.3857	22.1087	21.9445	22.1995	21.5433	0.0326751	0.0813863	-0.436069	ADGRE2;EMR2
27.6736	27.8557	27.8257	27.7434	28.1635	28.0343	28.1926	27.7984	0.0328819	0.0815895	0.272579	MYO1E
22.4984	23.0062	23.0096	22.5539	22.2841	22.0715	20.8869	22.0203	0.03274	0.0816079	-0.95131	TMEM177
22.4142	22.9886	23.2188	22.6936	24.2125	23.4207	23.5609	23.2037	0.0327265	0.0816273	0.770676	RNASEH2C
25.2509	25.5745	26.0643	25.9838	26.6521	26.8191	25.9557	26.3877	0.0330594	0.0816368	0.735265	USP15
21.2779	21.7261	22.2491	21.4693	20.3931	20.9726	21.3862	20.2548	0.0328352	0.0816791	-0.92895	PI4KA
23.7047	23.6653	23.8813	23.6682	24.5955	24.4429	24.5178	23.7039	0.0330512	0.0817262	0.585172	PRRC2A
25.2597	24.372	23.8197	23.1258	21.6398	22.8566	20.5672	23.2111	0.0330004	0.08175	-2.07563	BCKDHB
23.4694	23.2968	23.6353	22.6039	21.6966	22.8416	22.0067	22.6127	0.0328238	0.081769	-0.961957	VWA9
25.0704	24.6157	25.0015	25.1971	25.208	26.0352	25.9782	25.364	0.0331217	0.0818098	0.675204	RAVER1
28.4449	28.5694	27.8513	27.5889	27.2622	27.4613	27.0611	27.69	0.0332049	0.0818495	-0.744957	TBL2
28.8537	29.1202	29.555	29.2717	28.8006	28.5267	28.95	28.399	0.0332024	0.0819389	-0.531086	LMNB2
26.7907	27.0393	27.2884	26.2129	26.3117	25.7336	24.605	25.9287	0.0335883	0.0823217	-1.18808	ECHDC1
27.7091	27.64	27.45	27.9456	27.5244	27.1397	27.3664	27.2869	0.0335753	0.0823417	-0.356833	HCCS
25.0037	25.2585	25.3983	25.121	25.0169	24.221	24.5529	24.8518	0.0335725	0.0824314	-0.534758	MTX1
29.4234	29.3397	29.3813	29.1725	28.9933	29.1305	29.2381	29.1382	0.0337124	0.0824495	-0.204188	GNAI2
22.2822	22.5059	22.7093	22.6711	23.4392	23.3581	22.6237	23.0372	0.033892	0.0827302	0.572429	CHEK1
24.7991	25.154	24.4606	24.2916	24.2182	24.0569	22.9488	23.7521	0.0338895	0.08282	-0.932373	MEST
24.7109	24.4554	25.0558	24.5627	25.2307	25.0711	25.3105	24.9066	0.0339575	0.0828312	0.433528	RAB11FIP1
24.2049	24.1857	24.3757	22.443	25.0994	24.9657	25.0199	25.1131	0.0340749	0.0832613	1.2472	LARP4B
27.9923	28.057	28.7219	28.6131	29.3916	28.8354	28.9243	28.7835	0.0340628	0.0832865	0.637608	NUDC
26.9464	27.3356	27.7938	27.9624	28.2777	28.2017	28.2345	27.9548	0.0341814	0.0834002	0.657639	SNX3
24.0288	23.5684	24.1929	23.2132	24.4213	24.1301	24.7046	24.5038	0.0342605	0.0834194	0.68911	PARP2
23.6326	24.6421	25.3189	25.5764	24.2525	22.4028	22.2171	23.3264	0.0342384	0.0834698	-1.74281	OSBPL10
26.7129	26.8261	26.7505	26.0683	26.2564	25.3786	24.6658	25.8598	0.0342531	0.0835091	-1.04929	TM9SF3
29.2252	29.2886	29.0378	29.3201	28.1286	28.6777	29.0922	28.7089	0.0346191	0.0838632	-0.566059	SNRPD2
23.7552	23.8422	24.7493	24.777	25.8699	24.8792	26.1771	24.9157	0.0344593	0.0838755	1.17954	PGM2
21.7086	21.5275	21.2461	21.5902	23.7364	21.4358	24.1726	23.3871	0.0346351	0.0839104	1.66486	GRIPAP1
25.7225	25.8855	26.1606	26.3224	26.2657	26.4937	26.5736	26.3935	0.0345715	0.0839186	0.408856	KIF2A
26.2913	26.3722	26.6248	26.4881	25.1615	25.9347	25.5943	26.3095	0.0345899	0.0839529	-0.694113	FAF2
31.7253	31.9167	31.7906	31.7822	31.6615	31.7227	31.3853	31.5018	0.034448	0.0839656	-0.235861	GANAB
25.5408	24.2629	25.0739	23.4941	23.6704	23.2549	23.2057	23.1599	0.0345219	0.0840086	-1.2702	MRPL20
24.9914	25.2813	25.7308	25.6549	24.7194	25.0123	25.0639	24.78	0.0348041	0.0842426	-0.520723	SNAP29
27.2266	27.1585	27.6791	27.9126	28.2713	27.9466	28.2611	27.8203	0.0347979	0.0842726	0.580623	PSMC6
20.7188	21.0893	20.3824	21.4438	21.9694	21.9216	21.3917	21.3927	0.0347567	0.0843028	0.760293	TJP2
29.0145	28.839	29.1401	29.7354	30.3454	29.9498	29.7141	29.5463	0.0349416	0.0844803	0.706631	EEF1B2
28.038	28.1968	28.3037	28.234	28.4699	28.5176	28.7877	28.2827	0.0349634	0.0845478	0.32134	RDX
26.2714	26.2424	27.1109	27.0711	27.414	27.2062	27.8224	27.2636	0.0353409	0.0853841	0.7526	PPIH
25.4254	25.1976	24.1746	24.7746	22.6393	23.8903	20.6023	23.7242	0.035247	0.0854592	-2.179	ITGAV
26.4572	26.2883	25.8788	26.1601	26.7666	26.7175	26.4896	26.4191	0.0353314	0.0854746	0.402098	DIAPH1
21.9761	22.2197	21.633	22.3968	23.0353	23.1434	22.8943	22.1538	0.0356652	0.0862156	0.750269	AXL
25.0255	25.2299	26.0127	25.4195	26.566	26.0179	26.3354	25.757	0.0357127	0.0862429	0.747169	ARPC5
30.5849	30.8534	31.1265	29.9814	29.7493	29.7044	30.1281	30.0757	0.0358342	0.0863562	-0.722183	RPL15
27.2983	27.244	27.4429	27.1288	27.1511	26.8737	27.1197	26.8154	0.0359477	0.0864379	-0.288509	AHCYL1;AHCYL2
23.2541	22.8422	24.231	22.5628	24.7113	24.2453	24.3665	23.8973	0.0358234	0.0864473	1.08259	DHPS
28.6271	28.6841	29.1066	28.9604	29.5448	29.4886	29.2706	28.9576	0.036081	0.0866583	0.470831	PSMA6
25.4257	25.7534	26.3698	25.881	26.1943	26.6682	26.8532	26.3563	0.0362831	0.0868302	0.660522	UNC45A
23.6213	23.421	23.1788	23.4099	24.3231	23.6534	25.3275	24.2014	0.036186	0.0868739	0.968586	NPC2
25.0294	25.7183	26.0255	25.8552	22.4378	25.315	24.0838	24.0359	0.0362746	0.0869213	-1.68895	HMGN5
25.4919	25.5352	26.1474	26.1884	27.2761	26.4968	26.5473	26.2122	0.036392	0.0870251	0.792348	COPS6
23.5852	23.394	24.529	23.641	21.5679	23.023	22.9824	22.9218	0.0364443	0.0870355	-1.16351	STX16-NPEPL1;STX16
31.2767	31.2253	31.2505	31.4301	31.1244	31.0572	31.1754	30.7971	0.0363629	0.0870618	-0.257135	HNRNPL
22.6899	23.288	22.4978	20.772	21.2606	20.4459	20.6007	20.8404	0.0364348	0.0871264	-1.52505	ETFDH
28.6116	28.5167	29.3573	28.7418	29.6926	29.3413	29.4088	29.1461	0.0366323	0.0871509	0.590317	LGALS3
22.771	22.9646	23.4237	23.2567	21.7354	22.2281	22.5563	22.8683	0.036691	0.0871568	-0.756963	DHX40
27.5464	28.0915	28.2362	27.6553	27.6234	27.346	27.2855	27.3027	0.0368957	0.087205	-0.492969	P4HA1
27.3988	27.2584	27.1507	27.7812	27.9202	27.8859	28.2601	27.5943	0.0368648	0.0872332	0.517837	NUP37
28.3846	28.5281	28.406	28.8307	29.0137	28.8642	28.7556	28.781	0.0366284	0.0872417	0.31627	CCAR1
25.7238	25.6011	25.8551	26.0736	26.8135	25.8824	26.6283	26.3522	0.0366831	0.0872474	0.605683	TSN
26.207	26.0397	25.7495	26.4409	27.0066	26.5665	27.1554	26.3105	0.0368644	0.0873237	0.650464	PPT1
27.0952	27.2174	26.9013	27.0202	27.6655	27.4512	27.236	27.2162	0.0366281	0.0873326	0.333704	CKMT1A;CKMT1B
25.2345	25.0363	24.0314	24.4441	23.1835	20.637	21.7502	24.2364	0.0371012	0.087438	-2.23481	GADD45GIP1
26.6501	26.3771	26.7519	26.9694	27.162	26.8735	27.0954	27.0911	0.0370949	0.0875284	0.368399	PRKAR2A
30.9868	30.9217	31.1399	31.0775	31.4395	31.3676	31.0473	31.3199	0.0372505	0.087691	0.262074	XRCC6
25.6072	25.3464	24.8175	24.7339	25.7854	25.9069	25.5132	25.7055	0.0372453	0.0877196	0.601505	CMSS1
27.506	27.4452	27.399	27.1664	27.0297	26.8018	25.2863	26.1584	0.0371975	0.0877482	-1.0601	HSD17B12
31.3643	31.1073	30.7732	30.8148	31.6657	31.5666	31.3768	31.2397	0.0372856	0.0877654	0.447334	RPL22
23.9416	23.9723	24.5172	24.8781	23.2559	23.8678	22.1432	23.4442	0.0374262	0.0878602	-1.14954	LONP2
24.0859	23.8123	23.7018	24.1671	25.1285	24.6828	23.9666	24.957	0.0374627	0.0879384	0.741926	MCMBP
23.6348	23.6033	23.9035	23.4192	24.0272	23.9987	24.0531	23.7614	0.0375743	0.0880328	0.319906	CCDC50
25.5474	25.5843	26.4302	25.7506	24.4554	25.0849	25.5545	24.9712	0.0375585	0.0880451	-0.811603	HMG20A
23.9757	24.0671	23.8844	24.6332	24.8798	24.8346	24.3154	24.8072	0.0376398	0.0881105	0.569179	ATP6V1G1
31.9476	31.9759	31.6609	31.683	31.5967	31.6018	31.3421	31.6018	0.0377221	0.0882168	-0.281253	ATP1A1
23.3526	22.5629	23.0079	22.8166	24.0972	23.503	23.4423	23.284	0.0378054	0.0883228	0.646627	WDR6
28.7212	28.3102	28.6801	28.564	28.9052	29.0328	28.9961	28.6623	0.0378596	0.0884939	0.330232	TCOF1
23.3795	23.9946	24.8032	24.4504	23.0822	22.7167	23.8315	22.5292	0.0379046	0.0885219	-1.11702	ISOC2
24.2902	24.5695	23.9964	24.9508	25.2874	24.8266	25.3939	24.9103	0.0380519	0.0887162	0.65285	GTF2F1
21.7582	21.7926	21.8333	22.914	23.1861	22.7085	22.9038	22.7018	0.0382025	0.0887716	0.80051	GMPPB
22.6271	23.34	22.9924	22.3561	22.3068	22.1083	20.9344	21.9937	0.0380488	0.0888065	-0.993094	PEX16
26.5863	26.495	26.9867	26.4468	26.4624	26.2712	26.0653	26.0882	0.0381808	0.0888089	-0.406943	PPAN-P2RY11;PPAN
29.5418	29.6532	29.4601	28.2261	28.4227	28.2589	27.8265	28.5006	0.038327	0.0888462	-0.968144	VAPA
30.5146	30.3643	30.6509	30.8826	31.4955	30.8875	31.4169	30.812	0.0383217	0.0889362	0.549916	TPI1
23.534	23.8084	24.1976	24.781	25.2381	24.4923	24.7986	25.2518	0.0382961	0.0889655	0.864938	PPP4R2
25.6136	25.5878	25.4887	25.7915	25.4069	25.1171	25.5379	25.2383	0.0386811	0.0902002	-0.295325	TBC1D15
28.7101	28.5144	29.0978	28.9933	29.4052	29.5448	28.9466	29.3727	0.0387913	0.0902419	0.488436	SUMO2;SUMO3;SUMO4
26.5771	26.4763	26.913	27.0146	27.857	27.3912	27.6912	26.8154	0.0387672	0.0902765	0.693451	SRM
25.1482	24.8385	25.6519	25.6468	25.9804	25.8001	26.3939	25.7337	0.0387527	0.0902949	0.655686	XPOT
26.8887	27.2445	27.342	26.6461	24.4313	26.6455	26.234	25.3922	0.0392465	0.0908417	-1.35455	NDUFA2
25.8969	25.8635	26.2005	25.6931	24.6163	25.5991	25.634	24.9597	0.0392387	0.0909328	-0.711201	MYO6
19.2892	20.3441	22.1868	21.7515	19.4511	18.7717	19.4132	18.5889	0.0392361	0.0910241	-1.83666	CDC42BPA
26.9943	27.169	26.6405	27.1109	27.6087	27.0931	27.4355	27.474	0.0392204	0.0911156	0.424126	DIABLO
27.4961	27.2425	26.419	26.9699	24.524	26.3556	25.572	26.4312	0.0395	0.0911311	-1.31118	NDUFA4
28.318	28.5023	28.5562	28.401	28.6749	28.9959	28.9921	28.5067	0.039172	0.0911549	0.348034	DARS
28.957	28.8714	29.0427	29.195	28.7755	28.7883	28.9183	28.6315	0.039097	0.0911903	-0.238101	TBL3
27.7246	27.2135	27.5801	27.4281	28.0539	28.1334	27.6968	27.7114	0.039884	0.091509	0.412276	RFC4
24.8731	24.2085	25.0834	25.2324	25.7504	25.6224	25.7975	25.1099	0.0398514	0.0916004	0.720686	PIN1
27.8381	27.9489	27.7011	27.1226	27.3172	27.2199	26.7443	26.9852	0.0398089	0.091692	-0.586026	RAB9A
27.014	26.7854	27.5719	27.2805	27.8669	27.5492	27.5433	27.6335	0.0400852	0.092	0.485254	EXOSC7
26.6667	26.7269	26.8588	26.7102	26.4291	26.6613	26.0059	26.3844	0.0400943	0.0920199	-0.370461	HBS1L
23.6116	23.7389	22.9986	22.8855	22.6467	22.2345	20.5101	22.3381	0.0402108	0.0923104	-1.37629	BPHL
34.8883	34.8224	33.9193	33.8629	33.7159	33.5512	32.4162	33.5466	0.0404936	0.092719	-1.06571	CPS1
29.8591	29.9694	28.7323	30.3836	30.6419	30.9505	30.333	31.1132	0.040436	0.0927714	1.02354	S100A10
27.4154	27.4249	26.9498	27.2583	26.7836	27.0936	26.8614	26.963	0.0407226	0.0932567	-0.336733	BRD4
29.0789	29.2531	30.2018	30.1299	30.6464	30.153	31.5326	30.597	0.0406831	0.0932579	1.06637	SET;SETSIP
24.0939	25.1327	22.582	23.5845	20.7508	22.9446	20.2484	22.5961	0.0409119	0.0935074	-2.21327	CLPTM1L
26.2247	26.6075	27.2451	27.1432	27.9246	27.4961	27.5379	27.1914	0.0408829	0.0936	0.732355	ADSL
24.7931	24.8096	24.6585	25.4299	25.2468	25.463	25.3651	25.491	0.041254	0.0938014	0.468728	SAMHD1
29.0429	29.1111	29.2754	29.4105	29.9096	29.4957	29.4794	29.4103	0.0411962	0.0938935	0.363764	EIF6
23.5875	24.3899	24.6285	25.5265	25.6655	25.3643	26.1013	25.466	0.0412488	0.0938937	1.1162	KIAA1279
26.883	26.7737	26.835	26.6281	26.4559	26.7628	26.3921	26.2497	0.0411663	0.0939467	-0.314816	CEBPZ
28.5177	28.4375	29.2766	29.0498	29.7877	29.2503	29.5577	29.2201	0.0411518	0.0939763	0.633518	GDI2
21.5483	21.3907	22.5039	21.6499	22.4968	22.8848	22.2962	22.3443	0.0412394	0.0939862	0.732353	TMEM2
24.471	24.4962	24.3387	24.3535	24.3335	23.8365	23.2089	23.8641	0.0418229	0.094897	-0.604095	TRMT11
21.8245	22.071	22.1331	21.65	21.7878	21.0698	21.1147	20.2409	0.0418046	0.0949627	-0.866358	POLR2I
25.0929	24.6934	25.7875	25.0789	24.8778	24.4443	24.0405	24.3505	0.0423364	0.0951068	-0.734879	SCYL1
20.242	20.9722	21.6277	21.4009	20.0541	20.2285	20.5761	19.5201	0.0423989	0.0951309	-0.966004	ITPR2
25.4883	25.2583	26.0005	25.2704	26.4847	26.1853	25.968	25.7661	0.0422366	0.0951673	0.596626	HGS
21.8833	23.4984	24.9048	22.4674	21.2891	21.2055	22.0041	21.1284	0.0421649	0.0951852	-1.7817	CYP2S1
29.8484	29.7305	29.9979	29.9584	29.9699	30.2627	30.0972	30.0831	0.0419089	0.0951882	0.219448	SNRPA1
23.7656	23.8413	22.4411	24.1189	25.1112	24.4277	24.7802	24.2058	0.042431	0.0951899	1.08949	CHCHD7
29.2468	29.5533	29.6851	29.911	29.1956	29.0493	29.4241	28.9277	0.0423191	0.0951992	-0.449877	TXNDC5
33.0229	32.7797	33.2265	33.2177	33.3128	33.5192	33.7852	33.2625	0.0421563	0.0952156	0.408235	NCL
26.7655	26.9535	27.1013	27.1446	27.4682	27.4189	27.898	27.0942	0.0421515	0.0952539	0.478604	NENF
27.8162	27.8743	27.8478	27.97	28.1904	28.3466	28.3932	27.8614	0.042211	0.09526	0.320848	PRPF4
23.0644	23.8803	23.1063	23.2472	22.7774	20.808	22.3242	22.4643	0.0420052	0.0952713	-1.23106	AUH
23.3045	23.1969	23.3225	23.0061	22.2501	22.7462	22.7842	23.0975	0.0421375	0.0953196	-0.487984	ARMC10
26.2735	25.9182	26.4934	26.2446	25.0007	26.0548	25.2155	25.8239	0.0420756	0.0953738	-0.708724	CMC2
23.7519	23.5776	25.059	25.1611	20.5665	22.4179	20.8617	24.1781	0.0428749	0.0955907	-2.38133	SREK1
23.8133	23.2614	22.7953	23.4414	24.5233	24.1739	23.5346	24.0949	0.0428516	0.0956444	0.753798	CMTR1
22.096	21.64	21.5476	21.8245	22.0664	22.9539	22.0421	22.7129	0.0426944	0.095667	0.666803	DLGAP5
24.339	24.6162	23.7892	23.5728	21.4415	21.2101	21.0315	24.3139	0.042928	0.0956683	-2.08005	TXNRD2
21.3976	23.5688	23.8236	23.5533	25.2889	24.8027	24.1376	24.4444	0.0428314	0.0957369	1.58254	CAV1
20.9222	21.3103	21.7833	22.1674	20.9908	20.5057	20.7282	20.9517	0.0431524	0.0960424	-0.751719	TRIM32
32.6725	32.7121	32.2618	32.0591	31.8791	31.9841	31.2302	32.0704	0.0431635	0.0960577	-0.635411	MDH2
24.2711	24.2384	24.3204	24.32	24.2476	25.0625	25.0146	24.7421	0.0435044	0.0962109	0.479199	POLR3A
28.5899	28.2087	28.5428	28.5759	28.789	28.8428	28.6455	28.6797	0.0433097	0.0962385	0.259918	EDF1
28.2883	28.4602	28.0742	27.6717	27.6339	27.8111	27.1047	27.617	0.0434611	0.0962534	-0.581953	MTCH2
27.5255	27.4664	27.5117	27.5489	23.1663	26.3178	23.708	27.0707	0.0434131	0.0963458	-2.44744	CDK5RAP3
24.4704	24.3275	24.5279	24.1955	21.2273	23.4239	23.0936	23.8438	0.0436371	0.0963946	-1.48317	LAMTOR5
26.4164	26.2609	26.9706	26.87	27.463	27.1466	27.3561	26.8169	0.0443739	0.0981585	0.566173	ARPC5L
32.1528	32.3116	32.5431	32.4058	31.8544	32.2209	32.1671	31.9713	0.0444224	0.0981718	-0.299904	LMNB1
23.5008	23.7047	22.9112	23.8274	22.9573	22.8919	22.789	23.1269	0.0445457	0.0981804	-0.544764	ASCC1
27.2788	27.6093	28.0451	27.8991	28.4839	27.9518	28.6017	28.1097	0.0444314	0.0981888	0.57869	PFAS
23.7725	23.8127	24.1419	24.1803	24.2176	24.9568	24.5263	24.2513	0.0443488	0.0981989	0.511148	TELO2
26.3137	26.1309	25.7888	25.5438	25.1805	25.7094	25.335	25.4706	0.0445342	0.0982167	-0.520422	NCEH1
26.0208	26.1966	27.0539	26.2867	24.456	26.536	23.8553	23.9363	0.0443229	0.0982239	-1.69364	NDUFA12
28.6453	28.3642	28.7862	29.0036	29.4832	29.31	29.1613	28.8176	0.0445325	0.0983102	0.493192	EIF4H
24.236	24.1041	24.3343	24.0229	23.9098	24.1125	23.8457	23.9175	0.0444861	0.0983429	-0.227933	GSPT2
20.6008	21.5645	21.9045	22.015	22.3404	22.3718	22.4744	22.1983	0.0448405	0.0983592	0.825038	SETD1A
26.5404	26.4761	26.8236	26.5012	27.0309	26.9586	26.7471	26.7255	0.0448054	0.0983712	0.280199	DNAJC3
22.1672	22.3594	22.4599	21.2541	22.9844	23.2049	22.9045	22.4091	0.0448155	0.0984522	0.815565	AIDA
22.6262	22.3014	24.0334	24.5454	24.8808	24.8366	24.6519	24.6466	0.044788	0.0984645	1.37736	CUTC
20.7632	22.1469	23.0351	23.1002	23.4851	23.7929	23.8775	23.4931	0.0447759	0.0985579	1.4008	SELM
23.5832	26.8748	27.3489	23.5798	22.7689	22.911	20.8748	23.1964	0.0449875	0.0987573	-2.90891	EBP
27.2786	27.419	26.4713	26.361	25.6913	25.7554	26.0245	26.605	0.0451403	0.0989746	-0.86345	GLRX5
29.1967	29.0653	29.3151	29.2667	29.0003	29.1657	28.8725	28.9866	0.0451989	0.0989793	-0.204695	HDLBP
24.6632	24.774	24.61	24.4869	25.2534	25.1764	24.5889	25.2087	0.0450733	0.0990679	0.423311	PCBP2
25.6687	25.7345	25.4629	24.4792	23.0575	23.3762	22.9945	25.4181	0.0452569	0.099127	-1.62476	H1F0
28.5937	28.3234	29.2656	29.0206	29.3409	29.3113	29.3561	29.3252	0.0453429	0.0993233	0.532539	EIF4B
25.6185	25.6687	24.674	24.8487	25.486	26.2435	26.1199	26.0417	0.0459937	0.0993972	0.770324	YTHDF2
25.469	25.7347	25.5797	25.2298	23.5358	23.2092	19.7183	24.7113	0.0459545	0.0994227	-2.70966	NDUFS6
28.6374	28.9308	29.2986	29.2925	29.5141	29.2911	29.6375	29.4746	0.045562	0.0994345	0.439482	FKBP4
22.2762	22.6487	24.3181	23.0274	21.7005	22.0978	20.7172	22.1626	0.0454577	0.0994409	-1.39808	DFNA5
27.1386	26.6004	26.9067	27.0697	27.2234	27.24	27.1637	27.378	0.0454276	0.0994779	0.32242	PRPF3
24.0366	24.7992	24.3541	23.7346	24.9492	25.1049	24.6035	24.7934	0.0459395	0.0994781	0.631657	CFAP20
27.8461	27.847	28.1222	27.9534	27.4504	27.7328	27.8701	27.3786	0.0458537	0.0995224	-0.334197	SRP54
30.6978	31.4078	31.3659	32.0495	32.1682	32.542	32.9432	31.7086	0.0455042	0.0995276	0.960259	HSPA6;HSPA7
22.4857	23.0217	22.5435	22.4208	22.4392	22.2244	22.1406	21.9215	0.0458064	0.0995668	-0.436489	SUV39H1
24.3184	23.3982	24.295	23.5347	23.0112	23.449	22.3043	23.2678	0.0460543	0.0995874	-0.878486	ACBD5
25.3188	25.7611	25.6348	25.3603	25.1333	25.3953	25.1829	25.0936	0.0457136	0.0996445	-0.31745	HTRA2
23.6028	23.5017	22.8618	23.1176	24.1447	24.3152	23.2975	24.3601	0.045803	0.0996598	0.758431	GLS
27.2853	28.7386	28.0527	28.7886	29.2576	29.0097	29.4276	28.9031	0.0461046	0.0997549	0.933204	SOD1
29.9482	30.0178	29.7497	30.2893	30.3192	30.2812	30.3687	30.2055	0.0462733	0.0998333	0.292344	ACTN1
24.8275	24.3639	23.5599	24.7196	25.7644	25.4485	24.631	25.3749	0.0462076	0.0999259	0.936962	VASP
20.9569	22.9775	23.2027	21.9536	24.5392	23.7928	23.5311	23.1638	0.0461983	0.0999666	1.48406	NDC80
25.6795	25.4856	25.1076	25.4401	24.9796	25.1819	24.3475	25.0192	0.0466141	0.0999816	-0.546174	DLG1
31.3188	31.1541	31.3427	30.9931	31.6571	31.4219	31.5696	31.2973	0.0465949	0.100074	0.284291	RPL11
28.9164	28.9251	29.0304	30.0406	30.0144	29.7544	29.9742	29.9506	0.0465486	0.100163	0.695276	YWHAB
23.5886	24.5629	24.2454	24.6973	23.4275	23.8378	23.364	23.7369	0.0465756	0.100166	-0.682024	HEBP1
25.5038	25.2788	25.797	26.0427	25.8788	26.3546	26.3672	26.069	0.0464982	0.100255	0.511829	CENPF
27.601	27.3844	27.5555	27.4471	27.4716	27.1631	27.3062	27.1573	0.0468323	0.100335	-0.22245	AHCTF1
25.813	25.378	25.8208	25.0595	24.0873	25.0333	24.4101	25.2671	0.0474407	0.10148	-0.818359	PDS5B
28.6193	28.541	28.6991	28.7037	28.7514	28.7527	28.6964	28.7931	0.0474012	0.101549	0.107663	SRRT
22.706	23.0519	23.4266	22.8759	22.0086	22.3572	20.666	22.543	0.0474407	0.101574	-1.12139	UBXN6
25.0002	25.1684	23.6782	25.4917	26.4073	25.9206	25.7633	25.5828	0.0475114	0.101648	1.08385	BLMH
25.2844	25.1474	26.0908	26.2198	25.9524	26.9187	27.3761	26.5382	0.0476816	0.10202	1.01072	NUTF2
28.2362	28.4465	28.7286	28.7266	28.2559	28.3056	28.2118	27.9677	0.0480915	0.102557	-0.349238	PLOD3
25.6956	25.88	24.5983	25.2209	24.011	24.5106	22.1375	24.4896	0.0480231	0.102574	-1.56154	PPOX
24.2733	19.8038	24.5571	24.3645	26.5344	25.8209	26.8765	25.5601	0.0479817	0.102617	2.9483	STK24
26.061	26.3601	27.5013	26.2976	25.3077	26.2349	25.5391	24.8472	0.0478739	0.102639	-1.07275	RPL37A
23.0148	22.2965	23.464	23.0827	24.1303	23.9326	24.5866	23.1092	0.0478626	0.102648	0.975198	CHURC1-FNTB;CHURC1
26.4032	26.4028	27.0784	26.4853	27.1229	27.0671	27.2895	26.7977	0.047944	0.102662	0.476894	PGM1
26.9123	26.6154	26.5916	26.987	26.4331	26.1077	26.7007	26.245	0.0479696	0.102674	-0.404934	SEH1L
20.8285	20.7039	21.9017	20.2658	20.2434	20.1395	19.2559	19.9804	0.0483	0.10337	-1.02017	C16orf62
24.1567	25.0554	25.7323	23.8888	24.2557	22.7026	23.393	23.2306	0.0485089	0.103658	-1.31281	SUN1
30.2935	30.2868	30.9245	30.8106	31.2744	30.8027	31.2164	30.9972	0.048492	0.103695	0.493801	CCT5
21.8996	21.6109	22.1704	21.4299	22.0008	22.5177	22.4231	22.1579	0.0486952	0.10383	0.497159	DOCK6
28.113	28.0861	28.1467	28.4946	29.2882	28.4529	28.8052	28.4569	0.0486791	0.103866	0.540687	PEBP1
21.4746	21.3054	21.033	20.0025	19.9027	19.7298	20.577	19.842	0.0486442	0.103877	-0.941002	HELZ
22.3588	22.548	22.7742	22.7386	22.925	22.8126	23.1238	22.777	0.0488338	0.104036	0.304679	ARFGEF2
22.8938	23.9345	23.3354	24.5162	24.4934	24.2347	25.0263	24.8084	0.0489081	0.104058	0.970723	HEATR3
23.3177	21.7331	23.2098	24.4787	22.442	20.5164	19.9706	21.8785	0.0489586	0.104141	-1.98291	PNKP
25.1948	24.965	25.2419	25.5374	26.1197	25.6542	26.1355	25.308	0.049209	0.104776	0.569565	PGP
25.6961	26.3973	26.6767	25.8835	27.0169	26.7837	26.6972	26.5666	0.0493767	0.10505	0.602733	YTHDF3
25.6631	26.0809	25.6565	24.6984	24.3838	24.2917	21.8261	24.5916	0.0497754	0.105653	-1.75144	B4GALT1
30.2475	29.5095	29.4447	29.5802	30.2196	30.1825	30.1756	30.0594	0.0497712	0.105748	0.463795	MKI67
24.3706	25.6496	26.0316	25.9222	26.5842	26.4389	26.5725	26.2182	0.04993	0.105795	0.959985	ACTR1A
31.501	31.3419	31.4659	31.2446	31.7897	31.9612	31.4992	31.527	0.0501334	0.106318	0.305949	RPS2
26.8158	26.868	27.2609	26.6788	26.5829	26.723	26.5333	26.4086	0.0502696	0.106784	-0.343938	LEPRE1
28.7185	28.7844	28.077	28.8163	28.0573	28.3315	27.9707	28.1637	0.0502301	0.106822	-0.468274	WDR36
22.1612	22.0312	22.3005	21.5027	20.924	21.2569	21.9462	20.6457	0.0504447	0.107072	-0.805687	AMACR
26.7009	26.9915	26.949	26.9577	26.4487	26.8846	26.5429	26.601	0.0509031	0.107455	-0.28049	RDH13
24.5391	24.7547	24.1462	25.5526	25.6805	25.7282	25.1098	25.7006	0.0509183	0.107533	0.806628	FAM127A;FAM127C;FAM127B
24.8333	24.3846	24.2738	24.2569	25.5095	25.195	24.8041	24.6032	0.0511352	0.107541	0.590791	COPZ1
23.1358	23.695	23.6865	23.3312	24.594	23.978	24.1859	23.5674	0.0508874	0.10755	0.619239	STAT5A;STAT5B
29.697	29.7558	29.8761	29.7357	30.0924	30.1062	29.9981	29.7511	0.0510714	0.107601	0.220815	IQGAP1
30.0499	30.1642	30.6466	30.5679	30.9622	30.6541	30.8088	30.6245	0.0508751	0.107646	0.405269	STIP1
25.8349	25.2462	24.8452	22.8406	23.4628	22.573	20.1835	23.0163	0.0507577	0.107692	-2.38284	FAM162A
24.732	24.301	25.3664	25.4397	26.0908	25.6417	26.0814	25.2796	0.0507326	0.107742	0.813611	SWAP70
20.9469	21.0843	21.0452	20.7521	20.9049	21.6265	21.5374	21.8211	0.0508476	0.107743	0.515341	TTC19
31.3864	31.255	31.6998	31.5796	31.7857	31.7054	31.6638	31.7642	0.0513675	0.108028	0.249565	XRCC5
22.9923	23.4329	23.6541	23.7265	23.3609	22.122	22.3784	22.8484	0.0514945	0.108348	-0.774012	AKR1C3;AKR1C2;AKR1C4
29.1669	29.116	28.5768	28.2436	29.6113	29.9358	28.8974	29.7189	0.0517894	0.108801	0.76503	MTHFD2
20.5423	19.9715	20.1816	20.4111	19.6495	24.182	23.9398	24.249	0.051878	0.108918	2.72844	DSN1
24.0992	24.2488	25.2561	25.0585	25.3219	25.4531	25.7664	25.1681	0.0520592	0.109257	0.761729	CRKL
24.6608	24.9623	25.6096	25.6283	25.9101	26.2148	25.4786	26.0299	0.0524312	0.10968	0.693115	ARHGAP1
23.4188	22.4226	21.6704	21.6616	24.3574	23.9825	22.701	23.4326	0.0525187	0.109746	1.32508	ARL8A
24.391	24.6304	25.5565	24.6733	24.0358	23.3757	21.8224	24.2245	0.0529544	0.109765	-1.4482	SCAMP1
23.9904	21.5833	22.1121	24.6066	22.3206	20.7763	20.1803	20.7496	0.0529871	0.109771	-2.06643	TOMM7
27.3229	26.6712	27.1264	27.0251	26.5349	24.3631	26.2127	26.1365	0.0529358	0.109837	-1.2246	CHTOP
23.4653	24.1263	23.6515	24.0795	24.4313	24.3723	24.9001	23.9946	0.0525766	0.109839	0.593908	INPPL1
25.9332	25.7826	26.3489	25.3437	26.8991	26.4805	26.5881	26.0525	0.0529128	0.109853	0.652922	ARHGEF2
22.7531	23.5089	22.5	22.6753	24.1877	24.0939	22.9742	23.6096	0.0529002	0.109924	0.856986	IBA57
26.7941	26.8242	26.8339	27.0927	27.6151	27.6781	26.9112	27.2044	0.0527101	0.109986	0.465977	VPS26A
25.0559	24.5958	23.9461	23.9314	23.8938	23.872	23.4534	23.3773	0.0528863	0.110021	-0.733188	PCCA
26.1246	25.9771	24.8735	25.2193	24.5384	24.3608	22.2471	24.7481	0.0526423	0.110035	-1.57501	ALDH6A1
23.3354	23.0834	22.9487	23.0975	23.5792	23.7176	23.2094	23.3214	0.0526665	0.110037	0.340683	PIK3R4
27.6402	27.6796	28.1558	29.546	25.9852	27.0888	27.1583	27.4779	0.0528742	0.110118	-1.32787	RPS15
25.3016	24.5197	25.4503	24.8957	26.1521	25.2581	25.9112	25.5858	0.0537591	0.111077	0.68497	HDAC1
29.5431	29.5564	29.8187	30.0639	30.3907	30.2965	30.192	29.8078	0.0536114	0.111085	0.426233	IMPDH2
27.0646	27.2234	27.4213	27.0763	27.0103	27.03	26.6943	26.9594	0.0536622	0.111096	-0.272911	LIN7C
31.3853	31.5381	31.7946	31.8329	32.3122	31.9509	31.9695	31.7873	0.0537072	0.111104	0.367252	PGK1
25.4267	25.762	26.4067	25.9796	26.731	26.461	26.2449	26.3471	0.053607	0.111182	0.552264	PSMD9
29.8725	29.6793	29.4372	29.8836	30.2199	30.1411	29.8041	30.0296	0.0540864	0.111777	0.330538	EPRS
21.3669	20.7067	21.4303	19.4316	21.6342	22.3842	23.9128	21.7162	0.0541743	0.11185	1.67795	MAP7D1
25.8356	25.645	25.9846	26.2684	27.0569	26.3098	27.5989	26.1811	0.0543007	0.112	0.853294	WDR77
23.4576	23.4216	23.1616	23.7902	21.7288	22.3295	23.2271	23.0414	0.0543638	0.11224	-0.876041	PXDN
25.1637	24.8332	23.7717	25.2959	25.6833	25.5237	25.8674	25.4145	0.0545371	0.112371	0.856104	AKAP8L
23.5997	23.5116	23.418	22.5302	23.6168	24.4047	23.7352	24.3914	0.0548735	0.112977	0.772167	MTR
25.889	26.3325	26.1498	25.5801	26.522	26.2685	26.3214	26.895	0.0553479	0.112981	0.513857	DYNC1I2
22.5905	22.2469	23.1877	23.0245	23.2402	23.4767	23.4478	23.0898	0.0549488	0.113025	0.551212	NEU1
21.8421	22.2157	24.2114	22.4046	21.9854	21.0648	20.3527	21.3258	0.0552607	0.113056	-1.48628	PKP2
23.8306	23.3203	23.8173	23.6491	23.9346	23.9889	24.2541	23.8437	0.0552893	0.113059	0.351011	REPS1;REPS2
29.6987	29.6722	29.2336	28.8985	28.6984	28.8879	28.2567	29.1325	0.0553454	0.113078	-0.631866	POR
24.5022	24.8141	25.2163	25.9471	23.9232	24.165	24.7774	24.1863	0.055258	0.113154	-0.856941	PRRC1
26.9968	27.1547	27.7572	27.7833	29.7912	29.3474	28.6798	27.3283	0.0551568	0.113169	1.36367	PSME4
21.5399	21.3502	19.6974	22.8947	23.6768	22.4	23.1081	22.9865	0.0555124	0.113218	1.67227	UBR7
26.8767	26.7842	27.095	27.2349	25.3941	26.4877	26.6221	26.5529	0.0551415	0.113221	-0.73347	WDR75
29.1248	28.8065	28.9595	29.1448	29.2522	29.6426	29.1455	29.2695	0.0555382	0.113385	0.318542	FEN1
28.1793	28.2356	28.115	27.7023	28.0023	27.2117	26.2598	27.1925	0.0556128	0.113573	-0.891449	BCAT2
27.3407	27.1669	27.3	27.1902	27.9775	27.8727	27.2614	27.5041	0.055719	0.113621	0.404482	KIAA0368;ECM29
28.2555	28.7839	28.0613	27.63	26.4023	27.3137	24.7859	27.6937	0.0556679	0.113623	-1.63378	CYP51A1
27.1231	27.4294	28.0916	27.5132	27.0789	26.8129	27.2807	26.7246	0.0557919	0.113709	-0.565103	CYB5A
34.6048	34.5281	34.4981	34.7855	34.8079	34.8828	34.9605	34.6458	0.0559938	0.113961	0.220099	VIM
27.4308	27.5304	27.5868	27.7283	28.6262	27.9908	28.728	27.574	0.0561246	0.114232	0.660669	DSTN
28.3054	28.2089	28.5549	28.5739	29.1083	28.9371	28.6218	28.5221	0.0563205	0.114518	0.386541	QARS
27.9146	27.9074	28.6156	28.5206	29.3358	28.3008	29.3157	28.9142	0.0564006	0.114676	0.727116	CDC37
27.9304	28.1584	28.8208	28.5448	29.2051	28.8273	29.0064	28.6218	0.0566035	0.114944	0.551577	AHSA1
26.6269	26.8914	27.5003	27.3392	27.8492	27.4594	27.8012	27.4175	0.056595	0.115042	0.542372	KIF5B
24.2333	23.8544	24.0793	24.0234	24.4183	25.2754	24.2804	24.4576	0.0574045	0.115523	0.560308	NEMF
23.6255	25.7388	25.2935	23.8561	23.4742	23.7646	22.6834	23.2409	0.0575017	0.115571	-1.33771	SLC35B2
25.1245	25.4964	25.9943	25.606	26.281	26.1365	26.0568	25.7399	0.0573977	0.115621	0.498242	GAPVD1
28.6399	28.4568	28.7593	28.5697	28.7864	28.8522	28.8943	28.6588	0.0573804	0.115719	0.191504	HNRNPUL1
22.9723	21.5743	21.764	23.6586	21.9666	20.1765	21.0959	20.9304	0.0573577	0.115763	-1.44996	RAPH1
26.2595	25.6129	25.6675	25.9336	25.3285	24.8854	23.7099	25.5073	0.0572838	0.115786	-1.0106	MRPL53
29.0777	28.9664	29.2586	29.2812	29.1199	28.8678	28.7309	28.8014	0.0572416	0.115789	-0.265953	NSUN2
25.4742	25.6905	26.0337	25.7008	25.4942	25.5512	25.2299	25.3391	0.0571239	0.115799	-0.321199	DNAAF5
26.3415	26.4301	26.0524	26.2981	26.835	26.8035	26.2364	26.7996	0.0573558	0.115861	0.38809	SEPT11
28.4421	28.4069	29.2369	28.9737	29.398	29.1275	29.6821	29.1332	0.057104	0.115898	0.570279	MAPRE1
27.8073	27.4991	27.5934	27.0384	27.3233	26.8225	26.5796	27.0774	0.0578082	0.116189	-0.533821	CRYZ
19.7433	20.7743	20.2868	22.599	22.6553	22.6942	21.6373	22.7238	0.0577239	0.116196	1.5768	YIF1A
22.4249	22.2583	23.1424	22.7006	23.5898	22.9143	23.6826	22.9602	0.0579364	0.116239	0.655174	NOL3
23.7143	23.6452	23.7608	23.6219	23.5789	23.4697	23.6188	23.2544	0.0579288	0.11629	-0.205075	VRK2
25.656	25.6563	26.1249	25.6053	24.6487	25.2473	24.7995	25.7547	0.0580249	0.116292	-0.648089	MMS19
22.9824	23.7599	23.9896	23.399	24.8513	24.9225	23.6364	24.2161	0.0578963	0.116388	0.873867	ARHGAP18
25.3456	25.5495	25.4765	24.5151	24.886	24.5769	24.6009	24.3962	0.0582359	0.116584	-0.606682	PIGT
24.9515	24.8897	25.3345	25.332	25.7463	25.1889	26.0606	25.5471	0.0586808	0.116715	0.508778	CTBP1
25.1327	26.5783	26.8763	27.1044	27.992	27.2814	27.5978	27.257	0.0584296	0.116755	1.10913	CAPNS1
27.3008	27.0648	26.504	27.0354	25.956	26.7808	26.5168	26.4081	0.0585669	0.116767	-0.560794	VAMP7
27.4847	27.2912	28.0939	27.5538	27.2245	27.3225	26.9615	27.1616	0.0585347	0.116811	-0.438371	RCL1
29.4984	29.0821	29.2434	29.302	29.0959	28.968	28.906	29.1748	0.0586703	0.116812	-0.24533	RPL28
26.956	26.7547	26.5753	26.2947	27.7459	26.9509	27.8152	26.8223	0.058524	0.116855	0.688409	EIF3K
27.8986	28.9928	28.2677	27.6144	26.3109	27.5674	27.4528	27.501	0.0586576	0.116863	-0.985349	PPIF
25.9776	26.036	26.1011	26.1978	26.3325	26.1429	26.2922	26.1639	0.0588337	0.116907	0.15472	BTF3L4
27.3674	24.9112	25.5392	26.5685	27.7095	27.373	27.3427	27.1443	0.0588098	0.117004	1.29581	SH3GL1
25.7048	25.8221	26.8646	26.9205	26.7115	27.3002	27.7462	27.1776	0.0592737	0.117862	0.905864	LASP1
32.4522	31.6923	31.8495	31.4544	31.5162	31.262	31.2145	31.3839	0.0594741	0.11817	-0.517908	TFRC
30.1221	30.101	30.0008	29.6198	30.3735	30.6182	30.1828	30.1455	0.0596009	0.118527	0.369073	RPS20
26.8528	27.4598	27.0333	26.2981	26.34	26.5942	24.9903	25.729	0.0597903	0.118607	-0.997616	SCCPDH
22.9536	22.8202	23.8953	22.2487	19.4711	22.8378	19.7185	21.744	0.0599496	0.11861	-2.03661	HSCB
23.1407	23.1575	20.6835	22.0782	24.0759	24.354	23.2041	23.3986	0.0598477	0.118632	1.49316	CLASP1
24.3365	24.4352	23.9766	23.4997	24.6317	24.8727	24.4846	24.4261	0.059824	0.118648	0.541779	NOL8
20.7746	20.2356	20.4847	21.1825	19.8594	19.8063	20.6133	19.7039	0.060008	0.118655	-0.673641	GPR108
27.8535	27.2673	27.3377	26.8733	26.6776	27.0802	26.8754	26.5212	0.0597892	0.118705	-0.544333	POLR1E
22.1831	23.9229	24.192	23.81	24.2723	24.4453	25.1589	24.8313	0.0597819	0.118804	1.14993	RIOK1
24.7789	25.1454	25.635	25.3179	24.8255	24.5673	24.9442	24.7338	0.060095	0.118811	-0.451605	PPP3CA;PPP3CB
24.011	23.4127	22.0887	22.4162	20.4674	21.6571	19.7424	22.7273	0.0601956	0.118957	-1.83357	UQCC1
24.5792	24.4609	24.9217	24.342	25.8651	24.756	26.0147	24.8869	0.0603835	0.119114	0.804714	UMPS
28.7597	28.8132	28.5868	29.1668	29.533	29.0267	29.0468	29.2936	0.0603779	0.119179	0.393402	TALDO1
26.0398	25.842	26.5687	26.4242	26.7468	26.7948	26.5859	26.4552	0.0604761	0.119213	0.427	HAX1
22.7684	22.7139	22.6	22.558	22.6345	23.2112	22.9579	23.0355	0.0609708	0.120309	0.299692	TPBG
29.5131	29.8959	30.15	29.4744	28.6281	28.7854	29.8532	28.7545	0.0610328	0.120414	-0.753079	SAFB
24.0785	20.45	21.4643	24.9901	25.4245	25.2268	25.6066	24.7139	0.0612706	0.120468	2.49721	SEPT6
24.4215	24.0384	25.5267	25.7143	22.6065	23.0557	24.4099	24.1507	0.0612004	0.120518	-1.36955	SFSWAP
28.3098	28.3086	28.0637	28.2136	27.7636	28.166	28.0904	27.831	0.061229	0.120544	-0.261165	PWP2
23.7133	23.6923	24.329	24.2649	24.6807	24.5185	25.0229	24.1189	0.0611905	0.120617	0.585338	SPC24
21.6279	24.2603	25.2508	21.5954	20.2703	20.6114	21.9928	20.6633	0.0620065	0.121254	-2.29917	CIR1
27.2341	27.465	27.4317	27.1211	26.799	27.0839	25.9603	26.9643	0.0619329	0.121261	-0.611093	RPF2
26.5101	25.6564	26.7445	26.4396	27.2909	27.2346	27.136	26.4681	0.0621221	0.121302	0.69477	ARFGAP1
25.6475	25.4763	25.8254	25.9166	26.8171	26.2923	26.5374	25.6565	0.0619293	0.121361	0.6094	ANXA11
27.4682	27.6599	27.8636	27.6854	28.031	28.7441	27.8986	27.9574	0.0618808	0.121375	0.488473	CCDC86
29.8677	30.0495	29.4473	29.0502	29.1494	29.0826	28.3929	29.1452	0.0623897	0.121764	-0.661133	DLD
29.0248	29.0189	28.8765	29.04	29.0271	28.4519	28.6304	28.7004	0.0627384	0.122028	-0.287593	ITGB1
24.7804	24.2748	24.9974	24.9374	25.2335	25.1473	25.0933	25.0544	0.0626962	0.122033	0.384628	WAPAL
25.9763	25.5961	25.9902	25.5349	26.8774	26.426	25.9202	26.0891	0.0632449	0.122722	0.553808	EHD4
23.3886	23.9377	24.4931	25.1412	22.9758	23.6505	21.9829	23.5036	0.0631024	0.122725	-1.21197	CPVL
28.2557	28.4428	28.9796	28.7986	29.239	28.8829	29.4221	28.8745	0.0632168	0.122821	0.485456	TXNRD1
30.8895	30.4202	30.4411	30.4668	31.223	31.2171	30.6118	30.8596	0.0633362	0.122833	0.423486	RPS13
27.0077	26.7764	25.8501	25.7868	25.8429	25.4823	24.5733	25.6752	0.0631538	0.12285	-0.961863	ERLIN1
28.7803	28.8973	29.0985	28.9837	29.1166	29.003	29.5963	29.4348	0.0636388	0.12297	0.347739	HNRNPH3
24.9552	24.2325	24.4975	24.3349	25.4139	25.2294	24.6676	24.8401	0.0635788	0.122979	0.53269	MPG
28.3292	28.4563	28.069	27.6721	27.7374	27.4015	25.9841	27.4799	0.0634592	0.123067	-0.980917	PMPCA
24.8315	24.0173	23.2417	23.3511	23.0995	23.3856	21.7241	22.5258	0.0635647	0.123078	-1.17669	PIGU
28.766	28.8115	29.2778	29.1368	29.5768	29.399	29.2307	29.1806	0.0635386	0.123104	0.348784	GARS
29.0269	29.2087	29.1351	29.245	29.8377	29.3598	29.3736	29.277	0.0638367	0.12313	0.308121	MDH1
26.153	26.3024	26.9913	26.5869	27.2824	27.4589	27.1361	26.5711	0.063883	0.12313	0.60372	KIF4A
24.377	24.4099	23.2562	19.6177	26.2264	25.8418	25.1849	24.9972	0.0637925	0.123148	2.64736	PTGES
25.8495	26.1118	24.0532	24.8774	23.1347	24.2029	24.0753	24.4632	0.0640659	0.123514	-1.25397	DHCR7
31.5052	31.8908	32.1675	31.9548	31.2345	31.0998	31.8331	31.4384	0.0642427	0.123814	-0.478088	HNRNPA1;HNRNPA1L2
29.2839	29.2894	28.816	28.7368	28.7772	28.5142	27.3173	28.3312	0.0642843	0.123868	-0.796548	ACADM
23.2978	23.3793	24.3649	23.0301	21.4248	22.8421	21.412	23.2852	0.0644582	0.124196	-1.277	PBXIP1
26.5436	25.7346	26.319	26.6827	25.9474	26.0348	24.7239	24.5358	0.0647237	0.124606	-1.00953	ASCC3
24.4939	24.1745	24.0724	24.0558	20.6963	20.1963	23.964	23.37	0.0646759	0.124658	-2.14249	BRD3
32.6537	32.6423	32.9076	32.9891	33.0779	32.9291	33.3928	33.0078	0.0649302	0.12505	0.303691	ENO1
24.7812	24.1702	23.4793	24.5234	24.6858	25.1219	25.3833	24.7227	0.0650321	0.125251	0.7399	ILK
30.0456	30.3799	30.7196	30.749	30.2469	29.7769	30.0258	30.1087	0.0652158	0.125409	-0.433946	RCN1
26.3563	26.715	27.3903	27.0873	27.5816	27.3615	27.8787	27.1708	0.065165	0.125432	0.610911	TFG
27.5315	27.541	27.4785	26.8037	26.9079	26.9172	25.814	26.8208	0.0657272	0.12551	-0.723692	SYNJ2BP-COX16;SYNJ2BP
25.4672	25.2705	25.8273	26.269	26.8591	26.2384	26.2075	26.0636	0.065464	0.125581	0.633654	GCLM
28.0681	28.1799	27.711	27.0465	27.4263	27.1182	25.8917	26.8085	0.0656984	0.12561	-0.940174	NDUFS2
22.4484	22.3534	23.075	22.8814	23.5905	23.1256	23.2683	22.8504	0.0658029	0.125614	0.519128	SRA1
22.9342	22.8228	23.5608	23.8399	21.8723	22.5186	22.8214	22.8991	0.0654215	0.125681	-0.761557	PTPRK
21.6373	24.1744	24.2646	23.2429	22.6333	19.4747	21.0383	21.9513	0.0658957	0.125683	-2.05536	ENO3
28.5841	28.8414	29.3883	29.1703	29.4577	29.5178	29.3876	29.2807	0.0656531	0.12571	0.414922	PSMD2
26.8424	26.6732	27.3041	27.1373	27.8383	27.0731	27.9162	27.3471	0.0653919	0.125737	0.554421	TTLL12
28.0597	28.0104	27.4901	27.2925	27.5921	26.7861	26.0786	27.0848	0.0661217	0.12617	-0.827771	ME2
30.9779	31.0989	31.4758	31.5356	31.4831	31.5577	31.6804	31.6729	0.0662745	0.126311	0.326479	VCP
26.0578	25.7898	25.4288	26.1135	26.6524	26.2946	26.1043	26.1362	0.0663176	0.126401	0.449409	PRMT3
23.2973	22.824	24.7529	24.5103	22.864	22.9908	20.4846	22.3822	0.0665646	0.126712	-1.66571	MVP
26.011	25.8307	26.6417	26.3269	25.2236	25.6045	22.7056	25.1433	0.0667666	0.126787	-1.53333	NLN
21.8323	22.0117	20.3207	20.7953	21.8081	22.1219	22.5637	22.3975	0.0667004	0.126887	0.982795	NELFA
27.7935	27.4096	27.7299	27.6477	27.7958	27.9522	27.7948	27.8581	0.0670107	0.127089	0.205036	HCFC1
23.3668	23.541	29.2041	31.2229	31.0636	30.455	31.8167	32.134	0.0669792	0.127167	4.53362	TMSB4X
23.7461	23.7448	24.1402	23.3665	23.2754	21.216	20.5582	23.3822	0.0669721	0.127268	-1.64149	STK3;STK4
24.8573	24.2658	22.8616	24.6224	24.9765	25.341	25.1182	25.2139	0.0674	0.128035	1.01065	APTX
20.9747	20.9483	21.0211	21.4301	21.3679	21.3074	21.3074	21.434	0.0677213	0.128359	0.260653	SLC2A6
23.844	24.1313	24.7685	25.7208	23.7057	21.9331	19.9955	23.91	0.067761	0.128447	-2.2301	GDA
25.5638	25.5025	25.8803	26.1353	26.257	25.9804	26.1345	26.112	0.0678753	0.128591	0.35051	GPS1
24.5005	24.4011	24.0555	24.8132	24.4499	25.2877	26.2356	25.3229	0.0680371	0.128703	0.881416	FANCI
20.6648	22.7334	21.1185	21.6987	23.5517	23.6727	21.5338	23.4717	0.0682594	0.129286	1.50363	C4orf32
22.6342	22.5024	22.6896	24.0326	20.1121	20.0375	19.5096	23.5023	0.0686432	0.129969	-2.17434	IFRD2
25.0712	24.2305	24.6434	24.8991	23.6724	24.0397	21.0527	23.721	0.0687724	0.129978	-1.58963	GOLGA5
21.5133	23.2142	21.3505	20.9355	20.7612	20.1603	20.6146	20.8339	0.068702	0.129989	-1.16085	CEPT1
26.1025	26.1197	27.2411	26.7442	27.8684	27.1115	27.5816	26.8265	0.0691869	0.130095	0.795132	NUDT5
19.8557	22.1564	20.3296	21.5369	21.0101	23.3535	23.5093	22.9469	0.0688754	0.130139	1.73527	WNK1
29.509	28.8169	29.2632	29.4521	29.604	29.6262	30.0164	29.5037	0.0689941	0.130142	0.427277	SRRM2
22.9779	23.6304	22.1997	23.5498	24.0899	23.7247	24.1646	23.5635	0.0691683	0.130152	0.796214	PSMF1
27.9534	27.7779	27.766	27.7744	27.8456	27.5362	27.1291	27.3734	0.0691213	0.130207	-0.346859	PAIP1
23.3329	22.5985	21.818	22.6854	23.9135	23.5988	22.8707	23.4102	0.0690185	0.130243	0.839591	PRCP
22.1358	23.0207	23.1019	23.3737	22.2428	21.4841	20.0681	22.4777	0.0689649	0.130244	-1.33983	ACY1;ABHD14A-ACY1
25.6318	26.4643	26.5729	26.0838	23.8408	25.1361	25.1949	26.0837	0.0690555	0.130273	-1.12432	NDUFA10
30.2358	30.4922	31.1535	31.1746	30.1393	30.3228	30.1931	30.2755	0.0691077	0.130308	-0.531335	CALU
22.5248	22.7695	23.7544	23.378	19.0925	22.2611	20.6733	22.7159	0.0693905	0.130405	-1.92096	UNC13D
22.0667	22.3002	21.4727	21.3938	21.5712	21.2895	20.1901	20.8879	0.0693858	0.130506	-0.823709	LACE1
27.5511	27.4737	27.2601	27.0687	27.2309	27.0953	26.9705	26.7938	0.0696276	0.130654	-0.315805	TOR1AIP1
23.2557	23.3898	24.6145	24.3355	25.4223	25.0151	24.0166	25.1758	0.0699187	0.131151	1.0086	LIG1
26.004	26.0988	26.8231	26.3422	26.9365	26.9171	26.5757	26.6453	0.0699715	0.131183	0.451602	NCAPG
29.7275	29.6991	29.8301	29.3834	29.5332	29.3615	29.3963	29.4398	0.0701091	0.131316	-0.227303	RPL32
27.2312	27.2063	27.2022	27.2099	27.4851	27.4052	27.6529	27.1771	0.0703864	0.131583	0.217656	DNTTIP2
27.0131	26.4781	26.4442	27.6962	27.8739	27.347	27.6555	27.514	0.0703269	0.131685	0.689675	DBI
31.5236	31.5358	32.1618	32.1691	32.5498	32.208	32.2532	32.1633	0.0706856	0.131686	0.446002	YWHAE
23.6871	23.6779	23.658	23.5433	24.7936	24.7093	23.4261	24.4085	0.0705651	0.131772	0.692795	RNF20
24.7808	24.3715	24.8887	24.7049	22.2163	24.9799	21.6278	23.3679	0.0706836	0.131787	-1.63848	DPP9
21.9016	22.2976	21.9257	22.0888	21.5123	21.5703	20.7523	21.9858	0.0706728	0.131889	-0.598279	NR2F6
25.3457	25.4384	25.5482	25.9442	26.1789	25.8346	26.5703	25.725	0.0708512	0.131972	0.508051	QKI
25.8371	25.8708	26.566	25.8551	24.2987	24.4397	20.0055	25.0802	0.0710511	0.132018	-2.57625	CNPY2
28.1263	28.0949	27.3317	27.9224	27.5945	27.4386	27.3723	27.3967	0.0712993	0.132031	-0.418274	NOC2L
28.246	28.052	28.4472	28.0869	27.1623	27.4115	28.3271	27.5995	0.0711819	0.132092	-0.582913	MYO1C
28.5042	28.4739	28.5145	28.4108	28.8254	28.9527	28.5139	28.5584	0.0710277	0.13212	0.236732	DSP
26.012	25.6929	26.6238	25.3723	25.2229	25.6604	25.1625	24.4459	0.0712974	0.132132	-0.802339	BLVRB
20.6646	20.3144	22.6762	22.241	23.4047	22.7199	22.8227	22.3687	0.0709643	0.132157	1.35496	ZPR1
24.3057	22.7811	23.7088	22.7767	24.5735	24.3596	23.8562	24.318	0.0714209	0.132428	0.883785	EIF2B5
24.1665	24.1901	24.9032	24.8073	24.1234	23.2781	24.1006	24.0794	0.0717532	0.13311	-0.621368	URB2
28.0415	28.888	28.3763	28.2579	28.1434	27.0477	27.9886	27.7527	0.0718822	0.133145	-0.657817	TAF15
28.781	29.0006	28.3283	28.3026	28.3342	28.1224	27.5296	28.2442	0.0718342	0.133186	-0.545512	VDAC3
23.1074	23.1808	23.5788	23.5238	24.6902	23.8509	24.2828	23.3231	0.0723	0.133275	0.689054	USP8
22.4652	22.2856	21.7593	22.0782	22.729	22.7517	22.806	22.163	0.0722941	0.133376	0.465351	KMT2D
25.1618	25.704	22.8374	25.4807	22.4813	24.0988	22.9255	23.1878	0.0722571	0.133417	-1.62262	PRPF38B
27.4556	27.6276	27.1641	26.798	27.3046	25.4962	24.4041	26.2686	0.07211	0.133434	-1.39295	ECI1;DCI
27.7495	27.8307	27.2619	27.9521	28.1393	28.4333	28.3603	27.7459	0.0722307	0.133518	0.47113	TIMM13
27.3975	27.0959	27.4789	27.0849	25.2129	27.1414	26.723	26.263	0.0725247	0.133622	-0.929224	DHODH
22.7258	22.7345	23.1471	21.9489	21.4238	21.9408	22.1293	22.3167	0.0725024	0.133675	-0.686436	TCF25
20.0052	21.3461	21.6638	21.051	21.4544	22.0633	22.3183	21.755	0.072719	0.133777	0.88121	COG5
27.8447	27.9653	27.1667	27.3358	27.1191	27.0034	25.8944	27.1711	0.0727107	0.133879	-0.781121	NCLN
25.2452	25.5063	26.0517	25.883	26.5662	26.3176	25.9983	25.883	0.0728691	0.134179	0.519709	PPP6R3
29.341	29.6	28.6928	28.612	28.5848	28.5172	27.9832	28.665	0.0731074	0.134334	-0.623898	IDH3A
24.819	25.1491	25.208	25.3242	25.5943	25.3064	25.7722	25.2498	0.0730849	0.134372	0.355621	PIH1D1
24.7964	25.2355	24.9037	26.2372	26.0526	25.7424	26.2568	26.1243	0.0730065	0.134374	0.750818	MGEA5
22.2326	21.7184	21.74	21.9006	21.4833	20.742	20.4779	21.8849	0.0731958	0.134396	-0.750865	ATP13A3
28.8598	29.3264	28.719	27.6094	27.4389	27.9391	26.2976	28.1042	0.0734263	0.134877	-1.18369	TECR
24.8001	24.7116	23.661	24.6178	24.766	25.3097	25.3522	24.9593	0.0737242	0.135596	0.649198	BAIAP2L1
27.0825	27.0458	26.7651	26.8507	27.5451	26.9934	27.7268	27.1176	0.0739117	0.135816	0.409706	LAMC1
25.1751	25.1822	26.2715	24.3913	24.7947	24.1758	22.5418	24.1645	0.0738687	0.135852	-1.33581	GALNT7
27.2882	26.6886	26.8631	27.2608	27.3816	27.6556	27.2973	27.2627	0.0738579	0.135955	0.374128	G3BP2
23.5459	23.3578	22.2107	22.6209	20.1166	19.9011	22.4246	22.5462	0.0744045	0.136749	-1.68673	SMIM20
23.0202	22.948	21.782	23.1731	23.8479	23.9133	22.9863	23.4873	0.0744569	0.13676	0.827871	CUL2
25.3405	25.6123	26.1304	25.7157	27.0225	25.9668	26.419	25.9677	0.0745754	0.136955	0.644249	LSM6
26.412	26.5532	25.955	26.0943	27.3619	27.0148	26.3387	26.5876	0.0746795	0.13701	0.572141	MRPS25
31.0237	31.2094	30.2664	30.1778	30.018	29.9351	28.6446	30.24	0.0746693	0.137113	-0.959888	ETFB
26.5475	26.5316	26.8201	26.897	27.0765	27.2735	27.1664	26.6705	0.0748336	0.137136	0.347667	NUP88
23.433	24.0503	22.0973	24.1098	24.0623	24.3217	25.6148	24.6604	0.0751164	0.13719	1.24221	PPP4C
29.6131	29.4162	29.0115	28.8814	29.8827	30.3534	29.4443	29.5403	0.0751723	0.137267	0.574614	RPS28
25.9707	25.3587	26.8209	26.8287	27.8784	26.5771	27.8016	26.8854	0.075115	0.137292	1.04091	DUT
25.4828	25.5349	24.6643	27.062	24.4718	24.3354	23.9068	25.172	0.0751102	0.137365	-1.21451	TMEM126A
31.5284	31.2981	31.4825	31.849	31.6505	31.9217	32.144	31.7806	0.075253	0.137454	0.334746	SFPQ
24.0528	23.883	22.0198	22.4228	19.6426	22.6595	20.9398	21.9787	0.0753636	0.137694	-1.78944	OSGEPL1
24.0263	23.9712	22.2523	23.7387	24.5976	24.2239	24.5347	24.3097	0.0758131	0.138366	0.919349	MED17
23.6175	24.2479	23.1725	23.2277	22.7369	23.4955	22.0824	22.6833	0.0757984	0.138469	-0.816872	SLC30A5
25.823	25.8043	26.5024	26.0485	25.7401	25.8256	25.578	25.5085	0.0757239	0.138471	-0.381488	SPTBN2
19.9945	20.2013	20.3432	19.4322	20.431	22.1847	20.9513	20.3818	0.0761718	0.13863	0.994399	G6PD
27.4066	27.7849	27.7396	27.7231	26.5747	27.3199	27.076	27.6332	0.0762144	0.138652	-0.51259	PHF5A
27.8937	27.6796	28.8412	28.8543	29.1625	29.0278	28.8476	28.9412	0.0761441	0.138712	0.677543	PSMB4
24.9299	22.7534	24.0015	24.3586	20.7035	23.1829	22.8009	23.0253	0.0765424	0.138939	-1.58271	RAI14
22.7711	22.8719	23.2597	22.9502	20.7497	21.4727	21.4686	23.3399	0.0764264	0.138958	-1.20553	FLNC
29.3214	29.6324	29.5354	29.743	29.3251	29.3163	29.2913	29.4646	0.076584	0.138973	-0.208699	FBL
24.3437	22.0528	23.8535	19.5938	20.5187	19.8895	19.3926	20.5529	0.0765003	0.139001	-2.37254	MRPL30
25.3793	25.0968	23.9815	23.1849	23.3564	23.5629	22.2564	23.4252	0.0766996	0.139137	-1.2604	ADCK3
27.9455	27.7778	28.0586	27.8468	28.1749	28.4007	28.126	27.9193	0.0766626	0.139157	0.248053	CTNNA1
23.2996	23.0177	22.757	22.5439	21.6489	22.8641	20.795	22.2824	0.0771494	0.139487	-1.00697	PTRH1
19.9324	20.0311	21.3671	20.4867	20.547	21.6576	22.3639	21.4872	0.0770172	0.139499	1.05959	RBM23
23.9335	23.9643	23.3596	23.2654	24.846	24.1674	24.733	23.635	0.0768802	0.139507	0.714683	PLK1
22.5739	23.2775	22.7797	22.5483	20.633	20.7036	22.288	22.7324	0.0769716	0.139601	-1.20563	LYPLAL1
26.9568	27.6499	27.3502	26.7905	26.8184	26.6003	26.8508	26.7604	0.0773304	0.139811	-0.429402	FKBP8
26.3265	26.6781	26.5856	25.63	25.722	24.8566	24.9086	26.2427	0.0775824	0.140138	-0.872574	KRAS
21.8946	22.4547	22.8769	22.6409	23.2657	22.8864	22.9705	22.7512	0.07767	0.140156	0.501668	LRSAM1
24.196	23.9313	24.6162	23.3651	24.7377	24.2834	24.9812	24.6475	0.0779188	0.1406	0.635303	MEPCE
26.0834	26.0892	25.0095	26.003	26.76	26.2949	26.9757	26.035	0.077978	0.140781	0.720169	RPAP3
26.8508	27.24	28.038	27.9588	28.4143	28.207	28.2471	27.8504	0.0783525	0.141576	0.657784	TPT1
23.5105	23.7382	22.8141	23.66	22.0962	23.2377	23.1038	22.1598	0.0784306	0.141883	-0.78133	ENDOG
22.5394	22.7172	22.9065	22.3399	23.2562	23.044	23.1711	22.6146	0.0787719	0.142634	0.395734	EXOC3
29.0848	29.1576	29.616	29.6533	29.7844	29.5506	29.9259	29.6793	0.079138	0.14286	0.35711	MAP4
31.7084	31.6294	31.5259	31.1104	31.3497	31.1937	30.2233	30.8085	0.0790785	0.142876	-0.59977	LRRC59
24.3842	24.2105	24.6484	24.4106	25.8832	25.4578	24.1806	25.293	0.0790377	0.142981	0.790237	PSMG2
29.2362	29.512	30.2407	29.8856	30.4686	29.9191	30.4258	30.1966	0.0791616	0.143007	0.533902	ANXA5
28.1309	27.9644	28.1094	28.3747	28.6537	28.2426	28.5269	28.2665	0.0794916	0.143145	0.277578	ACTL6A
24.9489	25.1784	24.8477	25.2686	25.1049	25.3698	25.7411	26.2048	0.0793886	0.143206	0.544281	PROSC
23.0969	23.2558	22.6124	22.3961	21.4904	18.5636	21.2423	22.6224	0.0796479	0.143379	-1.86065	VASN
29.1664	29.2537	29.914	29.7154	30.3011	29.8339	29.8446	29.8641	0.0796842	0.143383	0.448584	AARS
27.7556	28.0649	28.1251	27.8517	27.7528	27.5955	26.7371	27.6201	0.0796834	0.143487	-0.522934	DPM1
27.851	27.3427	27.1161	27.272	28.0797	27.6693	28.4543	27.5603	0.0798253	0.143697	0.545459	EIF3G
26.3355	26.5616	25.0785	25.0952	24.8025	25.233	23.8831	24.9998	0.0803201	0.143838	-1.03808	FDXR
22.033	22.1242	22.3225	21.2131	21.6908	21.1972	21.3781	20.5784	0.0800445	0.143858	-0.712089	ATR
29.7639	29.7896	29.3481	29.2137	29.0407	29.1873	28.0399	29.2036	0.0801468	0.143907	-0.660938	ECHS1
27.3422	27.1488	26.4201	26.8076	25.2393	26.3538	22.7452	26.1824	0.08029	0.143916	-1.79951	MRPL19
26.3972	26.3497	25.9798	25.8896	25.9545	25.8289	25.8791	25.8488	0.0800251	0.143922	-0.276233	ABCC1
31.5788	31.9758	32.3826	31.8777	32.4618	32.2483	32.7386	32.1451	0.080254	0.143962	0.444739	PFN1
24.1041	23.0392	23.7395	23.7717	23.1586	22.9082	23.4699	22.9424	0.0800029	0.143983	-0.543894	PIGK
23.626	22.8273	23.6895	25.5359	21.0865	22.5837	20.4946	23.7182	0.0804725	0.144006	-1.94891	GTF2A1
20.5109	20.9704	21.2008	20.2452	19.1046	20.6095	19.7071	20.22	0.080546	0.144038	-0.821546	HPS5
27.4308	27.3551	27.0269	27.139	26.2637	27.054	25.5544	27.0036	0.0806833	0.144477	-0.768992	GRSF1
29.4789	29.5642	29.3664	28.7282	28.8922	28.956	28.7611	28.8992	0.0807633	0.144592	-0.407339	RPL18A
27.8	27.9422	28.0691	28.0973	28.0082	27.6814	27.6429	27.4518	0.0808418	0.14466	-0.281063	PLIN3
25.3645	25.4291	24.6975	25.5201	24.8843	24.7943	23.6065	24.746	0.0809308	0.144738	-0.745039	FOXRED1
23.7822	23.8916	23.6815	23.9936	23.6392	22.4388	23.4406	23.4738	0.0812496	0.144841	-0.589107	FAM96A
26.8573	26.8727	25.1071	24.9869	23.8478	25.0957	23.9845	25.4121	0.081553	0.145329	-1.37097	L2HGDH
26.9313	26.8005	26.6065	27.1698	26.5709	26.6488	26.0716	26.6748	0.081707	0.145398	-0.385517	CLTB
29.9158	29.8225	30.6216	30.2697	30.9475	30.476	30.688	30.3721	0.082105	0.14597	0.46347	ASS1
22.6802	22.557	24.7041	24.4665	25.1025	24.0591	25.8122	25.0567	0.0823338	0.146036	1.40566	SH3GLB2
27.6857	27.7253	27.5422	27.4608	26.0931	26.9883	27.3736	27.3807	0.0820781	0.146037	-0.644588	USP39
27.2568	27.467	27.4528	27.2013	27.0506	26.577	27.3987	26.4786	0.082309	0.146098	-0.468229	GOPC
21.1433	20.3911	23.8271	24.03	24.8182	24.0994	24.0915	24.2294	0.0825111	0.146189	1.96176	AAMP
24.9038	24.5348	25.4054	25.1486	25.5969	25.8377	25.1368	25.3973	0.0828581	0.147026	0.494027	NOP9
25.037	24.7382	26.6688	25.0274	21.523	22.8744	23.867	25.441	0.0831921	0.147591	-1.94147	INTS3
26.1289	25.7669	26.6495	26.7421	26.8707	26.8154	27.7005	26.6356	0.0833642	0.147766	0.683721	LARP4
23.4099	23.609	24.7692	24.1873	25.0017	24.3588	24.805	24.5993	0.0833611	0.147871	0.697376	PXN
23.7412	23.2787	22.5069	23.143	23.5613	23.753	24.4827	23.6259	0.0834311	0.147872	0.688265	GNE
23.1458	22.9864	23.297	22.2346	23.3716	23.4325	23.684	23.265	0.0835946	0.14812	0.52231	INTS6
23.4114	22.8843	23.5836	23.971	19.4679	22.7833	20.6655	23.2825	0.0839344	0.148604	-1.91276	LMNA
23.6588	23.4672	24.3293	23.1299	24.7735	24.7739	24.1337	23.8018	0.0839071	0.148664	0.724437	MPZL1
24.647	24.3281	24.3454	24.668	25.2018	25.5617	24.4352	24.9054	0.0840796	0.148942	0.528914	AURKB
26.8657	27.0182	27.0126	27.655	27.699	27.6378	27.5756	27.2823	0.0841627	0.149078	0.410807	UBQLN1
25.4865	25.3247	26.0473	25.579	24.2234	24.676	25.406	25.4054	0.0842352	0.149177	-0.681679	AKAP12
23.8093	24.0384	24.0167	24.8932	24.6285	24.6839	25.0955	24.5659	0.0845797	0.149824	0.554043	POLD2
28.0615	27.8059	28.3223	27.909	26.8365	27.6151	27.7576	27.8066	0.084751	0.149901	-0.520729	PTGES2
28.1537	28.228	28.3932	28.1141	28.0649	28.1015	27.3557	27.8612	0.0847239	0.149945	-0.376422	MRPL11
20.596	23.1569	21.118	21.619	20.9402	20.5238	19.21	20.3362	0.0849698	0.150217	-1.36991	SLC4A7
26.9693	26.6891	26.7506	27.0279	27.1547	27.1622	27.0752	26.8948	0.0850456	0.150221	0.212504	PDLIM7
27.4072	27.3961	27.772	27.7137	27.8963	27.7435	28.2634	27.7106	0.0852043	0.150489	0.331175	RFC2
25.0152	25.1325	25.1213	25.6953	25.6883	25.5097	26.1557	25.4427	0.0851785	0.150556	0.457989	CAPN1
24.1759	24.5169	24.9501	24.8796	25.1094	25.3777	25.1201	24.7394	0.085606	0.150749	0.456002	SNX6
30.5634	30.2912	30.9622	30.7726	31.1112	31.1066	31.5749	30.6929	0.0855793	0.150814	0.474069	PCBP2
27.6188	27.2526	27.6031	28.0208	28.5421	28.0636	27.7901	27.9534	0.0854809	0.150872	0.463473	ADH5
29.0547	29.1297	29.7352	29.5663	30.1207	29.678	30.0715	29.4794	0.0857834	0.150937	0.46595	PLS3
24.5653	24.9471	24.2569	25.2845	26.1486	24.7719	25.5612	25.5246	0.0862844	0.151986	0.738117	TIPRL
20.1709	20.5378	21.6132	21.3334	20.0938	20.5388	19.7235	20.2188	0.0866681	0.152485	-0.770111	KDELC2
24.0341	23.7654	24.1953	24.2487	19.6679	19.8435	24.9709	21.6605	0.0869293	0.152715	-2.52516	CD81
24.3479	23.9656	24.2061	24.8402	24.9883	25.0327	24.5236	24.6388	0.0876434	0.153292	0.455879	KDM3B
25.6688	25.766	24.9988	27.007	25.4258	24.8656	24.3183	24.9455	0.0874337	0.153308	-0.971331	THOC5
26.0756	26.1994	24.7456	24.893	19.9424	21.9563	24.2434	25.3947	0.087545	0.153327	-2.59422	SLC25A3
28.118	28.0607	28.6539	28.5306	29.1883	28.7928	28.768	28.397	0.0880583	0.154098	0.445722	PDCD6IP
21.5137	18.9682	23.1039	22.7861	23.3335	23.0174	24.2928	23.6969	0.0880581	0.154206	1.99219	CADM1
30.2173	30.7471	31.7112	32.189	29.8723	29.8688	30.643	30.4824	0.0883182	0.154375	-0.999529	TUBB
25.9739	25.3423	25.9186	25.6781	25.9716	25.8849	26.7184	26.262	0.0883051	0.154402	0.481011	PLAA
30.6548	30.5584	30.3705	30.4937	30.8457	30.995	30.6116	30.5713	0.0885987	0.154679	0.236545	DDX17
26.4731	25.8195	26.2062	26.245	26.8244	26.2264	26.6188	26.5677	0.0884902	0.15469	0.373366	SART3
27.9197	28.1095	28.8807	28.2783	28.9358	28.4086	29.2944	28.7985	0.088656	0.154691	0.562257	NAP1L4
30.6798	30.7196	31.0417	31.0833	30.3624	30.8296	30.3718	30.6847	0.0885226	0.154747	-0.318972	RPL3
25.9125	26.1697	26.4244	26.5599	26.0254	26.0955	25.4914	25.8565	0.0885833	0.154787	-0.399385	NUP54
27.3387	27.2441	28.0551	28.2168	28.7489	28.1895	28.9689	27.8413	0.0889062	0.155124	0.723472	HSP90AB4P
25.8581	25.8819	25.8758	25.762	26.2961	26.2161	25.7307	26.199	0.0892386	0.155613	0.266046	GPATCH4
20.4656	21.9408	21.8868	22.056	22.7271	22.6036	21.9171	22.4674	0.0894726	0.155644	0.841504	CHMP7
26.877	26.4388	26.5386	26.8647	27.0657	26.8899	26.9023	26.8483	0.0894707	0.155752	0.246787	EXOSC2
26.5387	26.1394	26.0993	26.1354	26.7576	26.5005	26.7321	26.2277	0.0894704	0.155861	0.326283	POLDIP3
23.6329	23.3566	20.7264	23.2068	24.3501	24.0988	24.243	23.7779	0.0894489	0.155933	1.38675	PHAX
22.9467	20.1884	23.013	22.5893	23.4935	23.7452	23.9202	23.1665	0.0898497	0.156533	1.39699	POU2F1;POU2F3;POU2F2
20.92	23.8463	23.093	23.1725	21.3759	21.5389	20.9378	21.8346	0.0902938	0.157457	-1.33617	MAD2L1
21.6172	21.3585	21.7227	22.0913	20.3113	21.6679	20.2063	21.3785	0.0905849	0.157517	-0.80645	KCTD5
24.4918	25.0862	24.7795	24.8839	24.9554	25.0728	25.164	25.1085	0.0905328	0.157587	0.264835	GBF1
27.7909	27.2995	27.6379	27.1387	27.909	27.8575	27.649	27.7481	0.0904368	0.157617	0.324163	EIF2A
20.6326	21.1063	20.7742	20.5021	22.9619	21.3346	20.6371	22.4794	0.0905068	0.157624	1.09943	FAM32A
32.9556	33.1255	32.8798	33.2239	32.6695	33.0012	32.8897	32.4318	0.0912147	0.158252	-0.298127	HNRNPC;HNRNPCL4;HNRNPCL1;HNRNPCL3;HNRNPCL2
27.5348	27.664	27.5075	27.6044	27.5466	27.4878	27.1836	27.3936	0.0914544	0.158677	-0.174792	SNTB2
23.6167	23.4906	23.894	23.2221	23.8855	23.5613	24.2865	24.3231	0.0914208	0.158767	0.45823	ELP3
24.2316	23.7828	24.6827	23.4933	20.698	23.4961	23.7856	22.167	0.0917433	0.159037	-1.51091	CNOT7
20.0245	19.8197	20.6584	19.9539	21.02	22.131	20.7647	20.16	0.0924049	0.159731	0.904812	ACTR6
22.1856	19.2578	24.9918	23.7251	25.3731	25.0441	24.4796	25.2743	0.0924537	0.159753	2.50269	PALLD
24.66	24.1693	23.484	23.7595	22.0889	23.9388	20.8347	23.3303	0.0923699	0.159772	-1.46997	ACADSB
23.2061	23.0591	23.9365	23.582	24.5873	24.1699	23.5937	23.7923	0.0923498	0.159843	0.589872	STAT6
21.8236	21.6825	23.1643	20.7503	21.4601	20.5948	20.6859	20.1474	0.0926268	0.159865	-1.13311	NT5E
29.948	29.7723	30.2047	30.3478	31.1819	30.2075	30.5746	30.3281	0.092203	0.15992	0.504808	TAGLN2
26.7964	26.8889	27.6521	27.1346	27.5536	27.8053	27.4719	27.3555	0.0923284	0.159953	0.428552	KATNAL2
26.7508	26.8243	27.1223	26.6497	26.5414	25.9906	26.8845	26.0034	0.0922799	0.159956	-0.481799	GNB2
28.2673	26.9946	27.7299	27.4086	28.4795	28.1597	28.1787	27.9155	0.0930128	0.160433	0.583261	HMGB3
29.1436	28.9583	28.417	28.024	28.3811	28.0206	27.2474	28.0836	0.0928228	0.160444	-0.702564	OGDH
27.6981	27.8392	27.7771	27.7005	27.4107	27.5587	27.8173	27.3173	0.0932021	0.160451	-0.227724	SLC9A3R2
23.2613	23.3074	22.8224	22.9247	22.0411	22.6315	21.3332	23.1066	0.0931667	0.160465	-0.800865	ASAH1
29.9208	29.9091	29.916	30.4899	30.9627	30.0461	30.8285	30.4156	0.0930999	0.160468	0.504267	PTGES3
23.2981	22.515	21.8798	24.273	24.3172	23.8407	24.8719	23.6127	0.0934099	0.160521	1.16916	PPP1R10
27.4988	27.8463	28.0502	28.0291	28.5266	27.9518	28.4537	28.035	0.0930008	0.160543	0.385673	RRM1
22.8756	23.1907	22.8126	23.1629	21.7233	20.9814	20.0994	23.4745	0.0933498	0.160592	-1.4408	UTP23
32.5464	32.5819	33.0436	32.6639	33.4695	33.0679	32.961	32.7973	0.0933169	0.160645	0.364976	LDHA
30.9247	30.8637	31.0414	31.0394	29.6912	30.7319	30.6423	30.7449	0.0936514	0.160698	-0.514709	PTBP1
24.0272	23.9995	23.3664	22.3043	21.4074	22.7527	20.8149	23.2145	0.093592	0.160769	-1.37701	OCIAD2
27.6506	27.3751	27.8535	27.5979	28.0983	27.9474	27.9094	27.6273	0.093971	0.161359	0.27635	CAD
26.424	26.4606	26.526	26.8136	27.0039	26.7332	27.0071	26.5761	0.0946373	0.162498	0.274044	PACSIN3
23.5505	23.6168	22.5989	22.5379	22.7685	21.9577	19.635	22.0628	0.0947978	0.162793	-1.47004	QPCTL
26.4327	26.0078	25.5615	25.4113	26.9955	26.9791	25.9444	26.2654	0.0951495	0.162921	0.692772	ERAL1
25.3129	24.2767	22.997	24.0741	25.0975	25.7561	24.9384	24.9321	0.0951294	0.163005	1.01585	SCAF1
31.7814	31.8968	31.895	31.9936	31.8273	31.8656	31.6782	31.6533	0.0950321	0.163049	-0.135569	SPTBN1
24.6503	24.4041	25.0764	24.9261	25.9298	25.0333	25.5388	24.8393	0.0950546	0.163098	0.571078	CSK
27.4425	27.6741	27.4662	27.5921	27.5171	27.3157	27.0422	27.3942	0.0951255	0.163115	-0.226448	PDAP1
24.0098	24.7277	25.4066	25.6577	25.8422	25.4406	25.9438	25.6311	0.0955417	0.163185	0.763954	CDK4
23.4912	23.4849	22.1371	19.9596	24.375	23.2441	24.627	23.8419	0.0955267	0.163258	1.75379	CDC26
26.5554	26.6262	26.9369	27.2508	27.7783	27.4255	28.2112	26.7299	0.0956936	0.163427	0.693932	RNH1
28.388	28.0026	26.8819	27.5951	27.3613	26.5124	25.6983	27.2994	0.0959887	0.164103	-0.999087	COMT
24.6145	24.7041	25.8406	24.668	25.4903	26.2042	25.5175	25.3762	0.0961209	0.164173	0.690269	FLYWCH2
25.3014	25.8394	25.0729	25.3812	25.3461	25.0401	24.0816	24.6206	0.0960379	0.164181	-0.62661	MRPL14
23.7101	24.014	23.6532	24.6625	22.7789	23.0141	23.7938	23.7345	0.0960871	0.164229	-0.679615	UBXN4
27.9991	27.96	26.6126	27.6216	26.9571	26.8213	26.4186	27.1643	0.0964044	0.164466	-0.707968	PYCR2
28.3493	28.3217	27.024	27.5714	28.8271	28.8231	28.2329	28.2383	0.09632	0.164485	0.713732	PRKAG3
21.6683	21.8768	22.867	21.7215	21.7896	21.64	20.7025	19.9256	0.0969494	0.164493	-1.01895	P4HA3
24.9213	24.9415	23.572	24.7952	25.4927	25.3026	25.0186	25.1368	0.0967683	0.164542	0.680165	EMC10
20.6449	20.4075	19.7753	21.1995	24.3556	21.2526	23.2472	20.514	0.096702	0.164578	1.83558	ASNSD1
29.3786	28.5507	27.5574	28.8539	29.5676	29.2476	29.2454	29.3512	0.0967212	0.164596	0.767799	RPLP1
31.0364	31.1459	31.6558	31.4727	31.9747	31.5401	31.9129	31.4306	0.0968959	0.164603	0.386854	PRDX6
24.6009	24.6442	25.2448	24.9889	25.8812	25.3706	25.0183	25.1339	0.0965472	0.164608	0.481287	PAFAH1B3
27.6032	27.8338	28.07	28.0882	28.2367	28.1794	28.0211	28.1273	0.0966125	0.164651	0.242349	ATP6V1A
25.8536	25.833	24.335	25.1585	26.1899	26.5076	25.6844	25.9366	0.0970558	0.164651	0.784599	OCIAD1
22.4965	22.1405	22.3118	23.3073	21.8523	22.21	21.2065	22.2215	0.0964821	0.16467	-0.691437	ACP2
23.7198	23.7344	21.1996	21.593	21.5888	21.3415	19.9687	21.3002	0.0972705	0.165068	-1.51189	MT-ND5
24.7881	25.3462	25.9199	25.3483	24.9748	24.7395	24.1022	25.084	0.0974387	0.165232	-0.62551	GSS
22.4989	22.2806	23.005	22.9733	22.6496	23.2716	24.9639	24.0331	0.0975463	0.165241	1.04009	SKP2
29.1699	29.2727	29.7643	29.1739	29.1185	29.042	29.0108	29.0819	0.097353	0.16527	-0.28188	DEK
32.6608	32.6112	32.7667	32.4805	32.5491	32.4869	32.0191	32.4178	0.097537	0.165324	-0.261574	PRKDC
26.5642	26.6405	26.2958	26.0595	25.9306	26.0222	24.7124	26.1113	0.0977015	0.165448	-0.695863	MRPL45
26.0108	25.9654	25.8522	25.9682	26.9637	26.5911	25.9618	26.101	0.0981415	0.165695	0.455208	ARMCX3
27.2644	27.2454	27.68	27.3428	27.8184	27.4219	28.0114	27.5739	0.0978788	0.165743	0.323271	SPR
20.5603	23.658	23.7794	23.1966	24.3529	24.6589	24.1429	24.0513	0.0982733	0.165776	1.50296	GMDS
25.3712	25.1996	24.4733	24.5433	25.4391	25.2713	25.1777	25.6745	0.0980053	0.165792	0.493809	PDPR
22.8971	23.3333	23.5331	22.7094	22.6248	22.3476	20.5532	22.7058	0.0981269	0.165805	-1.06038	ERBB2IP
27.932	28.041	27.597	27.1726	25.2625	27.239	24.5628	27.6373	0.0983571	0.165841	-1.51027	HACD3
21.5364	21.8466	22.3229	23.1405	22.9711	23.9188	23.0783	22.4781	0.0981257	0.165915	0.899965	AGFG1
25.1653	25.1338	25.7841	25.496	25.9544	25.4595	25.7775	25.8511	0.0980822	0.165961	0.365825	HSBP1
23.0155	23.4359	24.4288	24.3725	25.0716	24.4183	25.4894	24.0216	0.0985857	0.165983	0.937042	CRK
23.2978	23.809	24.3962	24.0782	24.5777	24.5321	24.5562	24.0162	0.098636	0.166034	0.525233	PMVK
24.3594	24.534	25.2168	25.1171	23.5843	24.2332	23.4395	19.6094	0.098875	0.166377	-2.09024	HNRNPM
25.6776	25.9435	25.2324	25.3647	24.6444	25.4055	23.606	25.189	0.0989458	0.166402	-0.84331	SARS2
23.1995	22.8892	23.972	23.4339	23.0113	22.9723	22.9778	22.5934	0.0993526	0.16665	-0.48496	DKFZp566H1924;NPTN
29.4437	29.3739	29.6608	29.5518	29.6614	29.7525	29.7621	29.5161	0.0990801	0.166665	0.165488	CSDE1
26.9054	27.0636	27.3239	27.0189	26.6126	26.7165	27.0431	26.9163	0.0991478	0.166721	-0.255849	PELP1
30.3621	30.4676	30.4451	30.2285	30.8804	30.6731	30.3117	30.6472	0.0993481	0.16676	0.252264	KARS
26.8062	27.0529	26.6713	26.4655	26.1092	26.0204	24.8165	26.7559	0.0993318	0.16687	-0.823465	SOD2
19.9038	20.1903	22.9749	22.7077	20.0826	19.1813	20.2142	19.739	0.0996178	0.167099	-1.63993	SCOC
25.0251	24.8451	24.3772	24.014	20.407	19.78	23.8621	24.611	0.0997121	0.167126	-2.40031	CNPY3
23.1244	23.2721	22.5254	23.3615	23.5699	23.273	24.3433	23.4485	0.0996098	0.167162	0.587809	TAF6
24.6974	24.5971	24.4285	24.6673	24.5029	24.3325	24.5287	24.05	0.0998279	0.167282	-0.244032	AP3M1
26.3931	26.7497	27.2022	26.6641	27.155	27.0483	27.1019	27.0279	0.100304	0.168	0.331007	XPO7
27.5851	27.6682	27.7278	27.3997	27.4792	27.1584	27.3096	27.553	0.100785	0.168333	-0.220183	CLINT1
31.1897	31.1982	31.1355	30.9363	30.9265	31.1317	30.5506	30.7948	0.100771	0.168401	-0.264002	VDAC2
29.6816	29.5772	29.7915	29.9493	30.2759	30.0457	29.856	29.831	0.100847	0.168411	0.25223	IARS
26.7538	26.3289	26.4855	26.3387	26.6599	26.8171	26.7451	26.5629	0.100606	0.168418	0.219515	CSNK2B;CSNK2B-LY6G5B-1181;CSNK2B-LY6G5B--991
26.3982	26.4384	26.9156	26.8293	24.177	25.9362	26.3678	26.1066	0.10076	0.168511	-0.99846	KPNA4
24.8797	24.2625	24.1459	24.7026	25.0749	25.1278	24.725	24.685	0.100958	0.168515	0.405497	ANKZF1
29.7505	29.7107	30.5445	30.3564	30.5489	30.6194	31.0632	30.2361	0.100756	0.168622	0.526356	PRDX2
27.4852	26.7506	27.9543	27.4066	27.9164	27.7807	27.8969	27.9362	0.101493	0.169138	0.483397	DNAJC9
22.5677	21.9577	23.5587	21.3031	23.3711	23.6281	23.0899	23.1286	0.101394	0.169168	0.957615	SVIL
24.2575	23.8754	23.9279	23.9124	23.8216	22.1657	23.788	21.2505	0.101335	0.169213	-1.23686	ERI1
23.4803	23.3303	21.0623	24.0251	24.9627	24.0815	23.7407	24.5871	0.101488	0.169248	1.36848	UBE2Z
25.7507	25.9968	25.1869	24.6435	24.0571	24.9331	21.6867	24.7066	0.101849	0.169537	-1.54862	ACSF3
28.0972	27.643	28.0522	27.8983	27.5076	27.986	26.8244	27.3644	0.101811	0.169554	-0.502061	SUGP2
21.7419	21.1793	19.8156	21.556	23.4732	23.1865	20.7153	22.7895	0.102078	0.169845	1.46791	SURF2
20.4994	20.1942	21.1155	19.1105	20.9577	21.0278	22.9196	20.9585	0.102131	0.169901	1.23602	FOXP4
24.108	23.6592	24.9009	24.3041	24.7294	24.9468	25.1897	24.4414	0.102066	0.169956	0.583796	OSGEP
28.4711	28.4656	29.1394	28.5709	29.2073	29.1886	28.8131	28.8992	0.102482	0.170607	0.365305	GCN1L1
26.2222	25.9565	26.6455	26.3475	25.9978	26.0146	26.1041	25.9145	0.102638	0.170792	-0.285208	MRPL43
20.7434	20.8976	20.0044	21.409	21.987	21.0665	21.1062	21.7483	0.102801	0.171248	0.713396	UQCC3
21.6838	21.4153	21.8157	21.6247	21.3697	21.4231	20.7977	21.5311	0.102785	0.171271	-0.354476	CSTF2T
26.2984	26.1129	26.2851	26.1241	25.9173	25.6241	26.2933	25.851	0.103132	0.1718	-0.283736	MBNL1
22.5519	22.8259	23.3669	23.0066	22.3117	22.2349	22.9256	22.5096	0.1033	0.171935	-0.442373	INTS4
23.8304	23.9959	24.7152	24.4713	24.9382	24.4779	25.419	24.4984	0.10362	0.172282	0.580185	RABL6
25.2038	25.8512	25.964	25.9136	26.7292	25.8813	26.0587	26.218	0.103769	0.172574	0.488644	SGTA
24.0518	25.5563	25.7352	25.7734	24.2436	24.0986	22.9148	25.1423	0.103851	0.172584	-1.17938	TMED5
23.8268	23.9274	22.652	22.5041	24.6169	24.0166	23.3522	24.6278	0.103958	0.172664	0.925784	ALAS1
24.2429	24.7142	25.5782	24.8857	25.6439	25.5256	25.4556	25.0955	0.104548	0.173042	0.574904	C11orf73
24.8034	25.1696	23.7722	25.1526	24.4965	23.7977	23.8065	23.9904	0.104512	0.173095	-0.701696	NDUFB1
23.5174	23.5747	23.9854	21.8188	22.5793	19.6256	20.5236	22.9866	0.104479	0.173206	-1.79529	AP2S1
26.2537	26.016	25.4764	26.1305	24.9643	24.9004	21.2664	25.3297	0.104391	0.173236	-1.85395	CSNK1A1
22.9463	23.1798	22.9366	22.6512	21.9705	22.6822	20.473	22.5931	0.104243	0.17324	-0.9988	MT-ATP8
26.8334	26.8969	26.1137	26.937	26.6653	27.2382	27.5057	27.4842	0.104456	0.173318	0.528117	MRPL13
26.6505	26.4722	26.8344	26.824	26.4112	26.7129	26.2375	26.4237	0.104908	0.173487	-0.248932	CTNNBL1
24.6401	23.8872	24.6814	23.8095	25.0811	25.1617	24.2985	24.8056	0.105325	0.174216	0.582191	EXOSC1
22.3079	22.7998	22.6915	22.3564	21.0404	22.2565	22.5909	21.2017	0.105508	0.17433	-0.76653	EPN2
26.2925	26.1167	25.3866	25.5812	25.3095	25.4875	23.6925	25.2947	0.105653	0.174478	-0.898211	BNIP1
27.1214	27.114	26.0971	25.8344	24.5856	26.1531	21.2632	25.5088	0.105891	0.174804	-2.16407	CPT2
22.1014	22.2531	23.5296	21.3838	20.9557	21.4005	21.1636	21.971	0.106362	0.175284	-0.944266	BICD2
28.0378	27.6897	27.797	27.9499	27.7936	27.6958	27.3262	27.6823	0.106324	0.175358	-0.244156	PDLIM1
27.8935	27.9185	27.9384	28.0493	27.9423	27.8949	27.6769	27.5884	0.106181	0.175382	-0.174287	MDN1
23.7606	24.3015	23.9088	24.4494	24.7089	24.2086	24.5461	24.4243	0.106232	0.175439	0.366882	EXOSC5
27.3359	27.4369	27.6138	27.5158	27.2586	27.2795	27.4983	27.1871	0.106277	0.17547	-0.169707	ATAD2
21.5341	21.8087	22.02	21.7543	22.2176	22.1098	23.3746	21.9767	0.106314	0.17547	0.640399	SOWAHC
24.302	24.1798	25.2109	23.8624	22.6994	23.5192	20.6186	24.3077	0.106587	0.175747	-1.60257	TEX30
22.9966	23.1694	23.3431	23.9048	23.7679	23.5145	24.894	23.9641	0.106716	0.175806	0.68163	FAM96B
23.6954	23.0181	22.9212	23.3268	23.7442	23.4991	23.57	23.5353	0.106684	0.175918	0.346767	DUS3L
29.3476	29.4904	29.1897	29.3762	28.8905	29.3766	28.9478	29.2076	0.106836	0.175936	-0.245377	OPA1
24.2745	24.2291	24.6788	24.7778	25.3542	24.5987	25.1136	24.6412	0.107345	0.176109	0.436862	WASL
25.2332	25.7468	25.3597	25.5035	25.2908	25.3762	24.3291	24.8451	0.107331	0.176222	-0.50047	SYPL1
20.7881	22.7123	21.6366	20.8262	20.2441	20.6233	20.4747	20.9976	0.10724	0.176275	-0.905883	ACAD10
26.1437	25.982	25.7256	26.45	26.6	26.4617	26.2773	26.2618	0.107416	0.176336	0.324905	NCOA5
23.695	22.8999	23.8878	23.6269	23.9834	24.1717	24.2882	23.6307	0.107531	0.17648	0.49111	NCOR2
20.4737	18.9662	21.046	20.761	20.9675	22.1413	20.7969	21.5306	0.10777	0.176866	1.04736	IFRD1
27.5375	27.6605	26.8576	26.3034	26.7848	26.4745	24.7465	26.1931	0.107832	0.176898	-1.04	TMEM214
24.7366	26.0376	25.9197	25.7701	27.0391	25.8476	26.9132	25.9375	0.107869	0.176916	0.818357	PPP5C
21.7552	20.9264	21.5554	21.7276	22.3897	21.7311	22.2816	21.6229	0.108067	0.177006	0.515182	SMAD5;SMAD1
24.3142	24.9153	23.6021	22.3686	23.4758	22.4551	21.1669	22.6274	0.108355	0.177144	-1.36874	POLRMT
26.3913	26.5484	27.3504	27.3989	27.7556	27.2388	27.8754	27.1999	0.108325	0.17723	0.595155	SUGT1
28.8207	28.6988	27.8944	28.3552	29.2682	29.626	29.2918	28.2787	0.10826	0.177307	0.673865	KIF21B;KIF7
24.2523	24.1466	23.7463	24.5215	23.2392	24.0494	23.4025	24.0053	0.10916	0.177742	-0.492561	SMARCD2
26.7645	26.7129	26.391	25.9971	27.6266	27.542	26.2507	27.1648	0.108876	0.177788	0.67965	GLS
27.2464	26.8162	27.3403	26.5135	27.8583	27.3045	27.1066	27.5382	0.10912	0.177788	0.472796	LIMK2
25.0066	25.0143	24.2312	24.4917	23.8207	21.4449	24.6677	23.4665	0.109054	0.177808	-1.33603	WDFY1
24.54	24.71	25.3586	24.7287	23.1356	21.4864	24.3438	24.7234	0.108954	0.177812	-1.41204	MRPL41
22.4617	21.5248	22.3539	22.7026	22.4861	20.9975	21.3146	20.861	0.108833	0.177832	-0.845983	DROSHA
26.3225	26.0291	26.7225	26.0725	25.9598	25.8024	24.6569	26.0279	0.109099	0.177883	-0.6749	LIG3
33.5057	33.1834	33.0725	33.8541	34.0676	33.7671	33.8736	33.502	0.108808	0.177944	0.398664	PPIA
27.7144	27.6311	27.8213	27.8865	27.718	27.7236	27.3341	27.372	0.109465	0.178156	-0.226395	USP14
33.382	33.5518	33.4839	33.4638	33.4987	33.6991	33.6604	33.4989	0.109569	0.178363	0.118931	HSPA5
29.2069	29.0966	29.4261	29.3168	29.1761	29.1308	29.1359	28.9874	0.109619	0.178374	-0.154015	PNN
25.0271	25.9588	26.1131	26.3513	26.9701	26.2514	26.0975	26.8274	0.11034	0.179445	0.674031	PAFAH1B1
31.8759	32.1402	32.3569	32.4893	32.8866	32.3518	33.1754	32.3131	0.110814	0.180085	0.466148	CALM2;CALM1;CALM3
23.0447	22.7386	22.5661	24.0139	23.5749	23.9828	23.8826	23.4945	0.110903	0.18013	0.642838	GSE1
28.368	28.354	28.7994	28.763	29.2941	28.7055	28.7467	28.8925	0.110773	0.180153	0.338608	EIF3C;EIF3CL
24.6458	25.86	25.4313	24.8121	23.9781	25.1012	24.373	24.5695	0.111157	0.18023	-0.681834	IMP4
20.6926	24.1479	23.893	23.0011	21.2327	20.9927	22.3625	20.6569	0.111141	0.180343	-1.62246	FKBP14
25.3951	25.4703	25.1901	25.1267	26.0615	26.0528	25.2242	25.51	0.111078	0.18036	0.416591	DIEXF
24.668	24.9412	24.0967	25.2066	25.2654	25.1034	27.2849	25.4483	0.11106	0.180406	1.04732	PISD
20.965	21.7717	22.2105	23.1029	19.569	20.8147	21.8017	21.0701	0.111977	0.181159	-1.19862	MAP2K6
25.108	24.4139	24.7169	23.9318	24.981	25.7032	24.6754	25.2786	0.111751	0.181249	0.616881	METTL16
24.3318	24.4123	25.3526	24.8734	25.3449	25.135	25.6048	24.9384	0.111954	0.181272	0.513249	UBXN7
20.9751	24.7808	19.9068	25.2017	24.6792	26.5293	24.4911	25.6996	0.112258	0.181297	2.63369	UBLCP1
24.4533	24.4705	23.6354	23.4192	23.8346	21.9601	21.6136	23.7629	0.112156	0.181313	-1.20181	RDH10
26.5901	26.5088	24.9512	25.8474	25.6441	25.488	24.4877	24.7748	0.111946	0.18135	-0.87572	NDUFAB1
24.3706	25.0315	26.0161	25.8295	25.7637	26.0308	26.4723	26.0134	0.111875	0.181373	0.758136	GGCT
24.7458	24.2065	23.8116	24.178	24.8566	24.7826	24.8229	24.2566	0.112473	0.181387	0.444217	ZMAT2
30.5752	30.6323	31.3516	31.2113	31.5256	31.2709	31.7581	31.0659	0.1124	0.18142	0.462511	HSPB1
28.723	28.5973	28.7691	28.5172	28.756	28.847	29.0194	28.6775	0.112919	0.182124	0.173329	CLPB
23.6785	22.7072	23.0497	22.8151	21.7907	23.6298	20.3024	20.9215	0.113058	0.182207	-1.40152	ZC3H7A
31.8912	31.6941	31.1251	32.0188	32.4826	32.0171	31.903	32.0641	0.113362	0.182836	0.434422	GNB2L1
24.4592	24.5818	23.36	24.36	22.7507	24.0238	20.8565	23.5658	0.114284	0.184702	-1.39106	NR2F1;NR2F2
26.8206	26.9086	26.1542	25.088	25.2832	25.3039	23.4775	25.9283	0.11485	0.185304	-1.2446	SLC27A2
20.1625	21.3987	21.6761	21.0702	20.1182	20.1167	21.049	18.6874	0.114821	0.185419	-1.08406	ATXN2
25.0968	25.2938	25.3414	25.5285	25.6642	25.5256	25.582	25.3284	0.114796	0.185534	0.209924	GIPC1
22.5802	22.6797	23.461	23.2593	21.1322	22.7578	22.5953	22.3504	0.115249	0.185968	-0.786096	BRE
27.2171	27.281	28.221	27.7887	28.1192	28.1724	28.3779	27.7915	0.115164	0.185994	0.488284	PTMS
23.3772	23.5476	24.0872	23.6914	22.643	23.6471	21.2503	23.1865	0.115788	0.186745	-0.994066	ROR2
21.14	20.7817	21.3146	21.5052	20.9104	20.0183	20.4571	21.1724	0.116031	0.186904	-0.545808	RANBP9
28.0222	27.6134	27.9702	27.8962	27.7567	27.5813	27.4129	27.81	0.116118	0.186966	-0.23526	RAD50
22.4768	22.391	22.2996	22.2333	20.6921	21.4283	19.4122	22.743	0.116224	0.18709	-1.28129	NR2C2
26.3623	26.0721	26.453	26.4983	26.4742	26.5983	26.8399	26.4401	0.116295	0.187091	0.24169	EIF2AK2
24.6253	24.7196	24.4162	24.413	24.3803	24.2989	24.3035	24.5163	0.116672	0.187803	-0.168772	PI4K2A
18.834	18.6728	21.342	20.556	20.1963	21.4414	21.6575	21.4994	0.117016	0.187975	1.34746	PEO1
22.6804	21.2621	23.8649	22.6138	23.5671	23.5987	23.3404	23.9	0.116915	0.187985	0.996264	NRBP1
23.0981	23.3892	24.313	23.733	23.0685	23.2982	20.9597	22.8432	0.116881	0.188039	-1.09092	SPG21
23.8709	23.4182	20.1038	22.2566	19.6652	21.1306	20.1485	21.6914	0.117156	0.188187	-1.75344	DOLPP1
25.8898	25.7786	26.314	25.6296	26.095	26.3882	26.9678	26.0458	0.117423	0.188579	0.471166	WDR5
26.2678	25.7037	26.1415	25.8564	26.5408	26.1965	26.2713	26.1181	0.117599	0.188674	0.289326	RPP30
21.9166	22.0347	21.8729	22.4066	21.7689	22.0052	21.1422	21.7102	0.117405	0.188695	-0.401062	GNPAT
25.7811	25.7701	25.5282	25.2436	24.8715	25.5772	24.0192	25.2415	0.118104	0.189431	-0.653395	MRPL33
24.2133	24.1932	24.1337	24.6682	25.8628	25.3506	25.3431	23.8849	0.118334	0.189595	0.808206	XPNPEP1
23.6032	22.4423	20.7674	23.6086	21.1407	21.6284	21.8984	19.8984	0.118589	0.189675	-1.46391	UQCR11
29.2825	29.1526	29.2022	29.1961	29.0009	28.9699	29.2742	29.0497	0.118491	0.189767	-0.134665	DDX1
25.5428	25.1663	25.4803	25.7432	24.5929	25.0769	23.7305	25.5605	0.11856	0.189791	-0.742989	LRBA
26.2845	26.4971	25.5181	24.7887	25.1084	24.8008	21.4715	24.8252	0.119011	0.190343	-1.72063	TAP2
26.9944	27.0248	27.4333	27.3223	26.772	26.6313	27.3306	26.3956	0.119229	0.190676	-0.411282	SNRPA
23.6925	23.7016	21.1808	23.6244	24.5378	24.082	24.4989	23.7894	0.119323	0.190741	1.1772	PCYT1A;PCYT1B
27.9618	27.9402	27.6708	27.1102	26.8776	26.5915	22.5003	26.8272	0.119462	0.190905	-1.97161	SDHB
27.1571	26.9201	26.6596	27.2589	26.5848	26.7557	26.8701	26.7266	0.11952	0.191052	-0.264645	FARSA
22.4887	23.2942	22.8895	23.9437	22.8745	22.8256	21.4383	22.1581	0.120265	0.192777	-0.829893	MED23
24.2623	24.4583	24.1392	23.6135	22.4846	24.0917	22.6396	23.9384	0.120551	0.192927	-0.829764	RAB30
27.8285	27.7719	27.6774	27.6518	27.5576	27.7678	26.6196	27.1225	0.120604	0.192958	-0.465533	CHD1
25.5415	25.6962	26.0579	25.3149	24.773	23.9908	25.1036	25.7997	0.120424	0.192962	-0.735806	TACO1
26.9982	27.2585	26.0578	26.2372	25.1076	26.4841	25.3333	26.3456	0.12084	0.193229	-0.820276	NDUFB11
23.9772	24.5188	23.592	23.5103	23.5305	22.3901	19.9835	23.4721	0.120743	0.193244	-1.55549	HSD17B8
25.4839	25.8918	26.2525	25.6611	25.9551	26.6181	26.4381	25.9758	0.12107	0.193701	0.424444	ZNF598
26.2556	25.8438	26.0684	26.1602	26.6943	26.5329	25.9671	26.4276	0.121142	0.193739	0.323489	PPP1CB
26.7183	26.5929	26.4553	25.6616	26.2478	25.8518	24.8854	25.7527	0.121263	0.193888	-0.672593	UQCRQ
22.916	22.8632	23.2897	23.2551	23.3547	23.8427	23.8888	26.5955	0.121645	0.194566	1.33945	DCUN1D5
32.8003	33.2268	33.7947	33.1216	33.6228	33.5287	34.1445	33.4949	0.121955	0.19509	0.461869	CFL1
29.0055	28.739	28.3303	29.1892	29.4815	29.0917	29.1148	29.0858	0.122107	0.195158	0.377427	STRAP
28.029	27.8805	28.491	28.3256	28.5957	28.6048	28.4905	28.2207	0.122551	0.195565	0.296397	UHRF1
24.9086	24.9088	23.7125	23.4758	22.9944	23.6136	19.8139	23.5379	0.12249	0.195623	-1.76146	NT5DC2
26.2766	26.1245	26.2418	26.6346	26.4136	26.64	26.5534	26.5297	0.122395	0.195628	0.214775	GTF3C1
25.2801	25.8369	25.343	24.1824	23.8447	24.3376	24.6978	24.8077	0.122434	0.19565	-0.738652	NDUFB7
23.2002	22.2762	24.4397	24.1147	20.2096	21.0934	20.2733	24.4533	0.122828	0.195882	-2.00032	DNAJB2;DNAJB6;DNAJB8
23.1019	23.5469	23.818	23.9739	23.6538	23.8706	25.1321	24.5642	0.123047	0.196176	0.695018	CCNB1
25.9603	26.3129	26.3967	26.1973	25.6104	26.2776	25.9959	25.7098	0.123614	0.196969	-0.318395	UFSP2
22.7865	22.432	22.9866	22.5109	22.8875	22.8982	22.9765	22.881	0.123709	0.197129	0.231805	SMAD2;SMAD3;SMAD9
23.9968	23.157	23.9595	24.1343	23.5018	23.4852	23.2594	23.3657	0.123932	0.197326	-0.408887	SPATA5
27.3818	27.2202	27.2787	27.3156	27.7303	27.6574	27.7104	27.1374	0.124045	0.1976	0.25981	UTP14A
23.7739	23.5069	21.8007	22.7499	23.9176	23.9544	23.1876	24.4241	0.124123	0.197636	0.913061	XXYLT1
24.4152	25.685	25.9584	25.6348	24.8191	25.0984	24.412	24.7066	0.124117	0.197755	-0.664328	YTHDC1
25.6047	25.1868	25.0056	25.317	25.2386	22.6506	25.1044	23.5682	0.124359	0.198091	-1.13807	FAHD1
24.5716	24.2421	23.7066	24.529	23.6213	24.2229	23.7266	22.4587	0.124659	0.19839	-0.754983	ZMYM4
24.1731	24.5016	24.096	26.0409	25.9886	25.524	25.3084	25.4047	0.124986	0.198529	0.853518	TUBB6
24.6512	24.4715	25.1181	24.5792	25.2601	25.5983	24.6461	25.0607	0.124863	0.198619	0.43631	CHRAC1
28.9552	29.1458	29.2413	29.0667	29.1181	29.5835	29.2939	29.2392	0.124986	0.198648	0.206441	SMC3
21.8677	21.8085	22.3785	22.1808	21.1529	20.861	22.1711	21.7471	0.125321	0.199215	-0.575846	ATAD5
23.5561	23.2408	23.5166	23.4511	23.7544	23.4897	24.0871	23.5279	0.126135	0.200225	0.27361	ORC1
24.6278	23.8862	23.7379	24.9349	25.9738	24.768	25.5973	24.2723	0.12628	0.200325	0.856168	SNX1
25.4877	25.3739	25.6202	25.0343	26.7818	25.7501	25.7335	25.4811	0.126554	0.200731	0.557623	SRSF5
21.3364	20.5459	20.9001	20.2836	20.2608	22.2273	22.2	22.1723	0.12709	0.201211	0.948612	CCDC85C
26.6256	26.4365	27.1814	27.8473	28.1666	27.0949	28.6697	27.5014	0.12692	0.201235	0.83547	EIF1;EIF1B
24.5954	24.2418	25.1143	24.9967	24.2276	24.6712	24.2372	24.1905	0.127234	0.201267	-0.405412	XRCC1
23.0658	23.1565	22.9825	23.1919	23.6259	23.2878	24.17	23.0569	0.127075	0.201309	0.435989	USP3
26.5663	26.4701	27.1449	26.9534	27.6672	27.1666	27.2345	26.7792	0.127042	0.201315	0.428226	GNPDA1
24.5668	24.4676	24.6297	24.4362	24.6256	24.9839	24.4987	24.8047	0.127359	0.20136	0.203154	KDM2A
25.8152	25.945	23.6252	25.8699	26.6709	26.5985	25.7746	26.4514	0.127506	0.201611	1.05999	PTGR1
26.5721	26.6826	26.8508	26.577	27.3524	26.9109	26.9905	26.6064	0.127704	0.201774	0.294443	TFCP2
31.6066	31.3075	31	30.9573	31.8645	31.5537	31.585	31.2534	0.127918	0.202072	0.346324	RPL27A
24.1901	24.2049	25.3485	23.8072	24.469	23.0891	19.1438	22.5362	0.128392	0.202428	-2.07815	MON2
22.4434	22.6048	22.2213	24.0294	25.237	23.4651	23.0552	23.9544	0.128373	0.202501	1.10318	HYPK
25.1158	24.5389	24.6866	24.6576	24.6758	24.2844	24.4004	23.2143	0.128994	0.20322	-0.606004	SYNPO
24.3775	24.5282	24.3598	24.4117	25.061	24.334	24.5801	25.3861	0.129179	0.203325	0.420998	NEDD4L
27.6327	27.3204	27.4567	27.3387	28.134	27.6517	27.5671	27.5148	0.128989	0.203341	0.279794	UPF1
25.2574	25.4126	25.6772	24.3682	24.8753	24.7827	23.7065	24.6042	0.128944	0.203402	-0.686683	TM9SF2
24.5319	23.8242	24.2678	24.4985	24.4137	24.4717	24.7255	24.9313	0.129748	0.204454	0.354932	ASUN
22.3897	22.993	23.1366	23.593	21.7843	22.838	22.1154	22.8296	0.129669	0.204466	-0.636252	FBXW11;BTRC
25.7243	25.686	25.6784	25.8273	26.2224	26.2097	25.5796	25.9837	0.130239	0.20477	0.26985	MAP1LC3B;MAP1LC3B2;MAP1LC3A
22.2767	22.2153	21.3361	21.3515	22.746	22.546	22.0907	22.009	0.130238	0.204891	0.55298	AKT1S1
20.373	19.4277	26.5626	24.183	24.5288	26.1038	26.0361	25.8054	0.130764	0.205612	2.98195	SEPT5
22.194	22.0693	22.6106	22.5493	20.7088	21.8252	22.166	22.148	0.130877	0.205627	-0.643829	GRB7
25.2549	25.0706	25.8372	25.4547	25.531	25.792	26.1169	25.6343	0.13076	0.205679	0.364178	PRPSAP1
28.848	28.8046	28.3536	29.1794	29.2987	29.211	29.0496	28.9387	0.131319	0.205918	0.328088	IDH1
22.2127	22.388	25.1001	24.4863	22.9449	22.1837	22.1997	21.1108	0.131385	0.205968	-1.43701	RBMS1;RBMS3;RBMS2
25.1655	25.255	24.824	24.4303	24.3717	24.6071	22.8423	24.6072	0.131317	0.206039	-0.811615	ICT1
22.934	23.312	23.7413	23.8885	24.4669	24.0167	23.4382	24.0603	0.13241	0.206985	0.526579	IRGQ
25.8189	26.3528	26.3021	25.9434	26.4676	26.3761	26.1834	26.4016	0.132203	0.206988	0.252851	DNAJC8
23.6485	22.8251	23.8343	21.1598	21.7579	22.7089	21.1766	20.3501	0.132381	0.20705	-1.36855	THEM4
23.1011	22.607	22.5819	22.0524	22.5227	22.0544	21.5833	22.171	0.132578	0.207171	-0.502739	OAS3
31.8593	31.8029	31.8827	31.6468	31.8039	31.6331	31.6802	31.5715	0.133077	0.208056	-0.125739	RPS8
21.7097	21.3167	23.2992	21.7044	21.7831	18.9555	20.6526	21.3463	0.133031	0.208063	-1.32313	HSD17B7
20.4294	19.6264	20.0111	21.5258	19.9716	24.3017	21.2613	23.6778	0.13296	0.208113	1.90493	ZNF766
25.877	24.98	24.6413	23.8813	20.7564	23.3786	23.9969	24.6568	0.133289	0.208391	-1.64774	LPCAT4
21.8193	22.4561	22.3084	22.3695	20.4203	20.8022	22.3407	22.0207	0.13365	0.208721	-0.842371	CCNL1
24.2636	23.9117	24.8781	24.7349	24.0902	24.1902	24.1007	23.676	0.133616	0.208763	-0.432793	DCPS
32.3653	32.3599	32.6087	32.6291	33.0407	32.5836	32.5981	32.6499	0.134243	0.208846	0.227349	EEF2
29.1659	29.6605	29.8473	29.424	30.5023	30.2999	29.3181	30.0387	0.134207	0.208944	0.515314	RPS24
24.1426	24.5331	24.6436	24.1371	24.9824	24.4029	24.8289	24.5353	0.134096	0.208975	0.3233	RABGGTB
27.2521	26.6779	27.6678	27.3339	27.9029	27.3825	28.0377	27.4352	0.133846	0.209046	0.456662	POLR1C
27.2945	27.1126	27.1421	27.2804	27.5733	27.4171	27.4565	27.122	0.134056	0.209055	0.184834	ZC3HAV1
28.9308	29.23	29.6177	30.5414	30.8183	30.6214	30.7603	29.4366	0.134028	0.20914	0.829205	TUBA4A
26.8624	26.3315	26.3579	26.191	25.7777	26.3691	25.5624	26.3172	0.133978	0.209258	-0.429084	HP1BP3
24.7281	25.1174	25.0098	24.736	24.2493	24.245	20.4478	24.1095	0.134019	0.209262	-1.63489	PIGS
27.7689	27.9987	28.1883	28.4228	27.8667	27.3704	28.0203	27.7634	0.134531	0.209274	-0.339491	NUP133
27.8335	27.5148	27.643	27.7309	28.2486	28.3697	27.5305	27.9473	0.134726	0.209336	0.343506	DRG1
24.9406	24.2055	24.5237	23.5614	23.3233	22.7975	23.2387	24.5678	0.135024	0.209742	-0.825936	FARS2
31.8833	31.4535	31.7893	31.9589	31.5901	31.6408	31.5968	31.415	0.135268	0.209871	-0.210615	HNRNPM
26.5268	26.1159	26.2996	26.6755	25.1107	25.9956	26.2701	26.2063	0.135534	0.210142	-0.508787	TRIM56
23.2219	23.4317	23.5217	23.4957	22.4225	23.2511	19.8298	22.837	0.135704	0.210216	-1.33267	ANKFY1
24.3766	24.5832	21.281	23.8136	21.4085	22.7749	21.0455	22.737	0.135696	0.210338	-1.52218	MRPS21
25.353	25.7142	25.1609	24.9261	25.0635	25.2402	24.3043	24.7205	0.136043	0.210778	-0.456429	GOLIM4
26.4474	26.5833	26.6047	26.5726	26.7447	25.4324	25.981	26.171	0.136136	0.210813	-0.469704	SDF2L1
23.666	24.2391	24.0479	22.6763	21.0597	23.1541	21.9892	23.7035	0.136443	0.211039	-1.18077	MRPS14
25.2039	24.8903	25.3233	25.6322	25.764	25.4719	25.3501	25.7178	0.136616	0.211098	0.313518	WTAP
32.401	32.1016	31.7614	32.0683	32.5648	32.7018	32.0941	32.2761	0.136424	0.211162	0.326121	RPL7
21.7074	21.1498	20.5951	20.4615	21.1504	21.6492	21.6696	21.5729	0.136896	0.211245	0.532044	DNAJC1
31.9934	31.9809	32.0962	31.7282	31.4471	31.8283	30.9761	31.9491	0.136868	0.21133	-0.39953	RPL6
20.5555	20.7103	24.7965	21.572	24.413	22.0963	25.0798	24.1415	0.136849	0.211452	2.02408	MAPK1IP1L
27.5263	27.4283	27.2642	27.5789	26.8125	27.1669	27.4475	27.3166	0.136825	0.211505	-0.263536	XRN2
26.7609	26.9596	26.0145	26.4548	26.0509	25.4405	26.0264	26.5616	0.137494	0.211993	-0.527618	POLR2E
27.1981	27.2199	26.316	26.208	27.693	27.8375	26.554	27.6085	0.137786	0.212037	0.687766	MRPS2
26.4422	26.3751	27.2434	26.9797	26.9552	27.1006	28.1332	27.1822	0.137769	0.212136	0.582713	XPO5
22.4126	22.7158	23.5092	23.2451	22.0044	22.7952	20.3237	22.5734	0.137968	0.212299	-1.04647	NFKB1
23.1673	23.1233	23.0313	24.1772	23.911	23.7321	24.2254	23.6611	0.138219	0.212686	0.507645	POLD3
26.8287	26.3531	26.576	26.4938	24.4876	24.8735	26.9306	26.0748	0.138497	0.21283	-0.971263	LSM4
27.7919	27.7811	27.7281	27.7824	27.7469	28.037	27.9869	27.8023	0.138494	0.212952	0.122407	CDK11B;CDC2L1;CDK11A
24.1497	23.3799	20.5875	24.7696	24.6172	25.0039	24.9699	24.6383	0.138628	0.213071	1.58567	RMDN1
26.0575	26.0666	26.0304	26.0776	26.6064	26.4596	25.8295	27.0101	0.138882	0.213254	0.418369	LLPH
24.4925	24.3622	24.2772	24.551	24.5079	24.7097	25.3976	24.544	0.138999	0.213255	0.369039	TBCD
27.9258	27.7148	27.8458	27.6748	28.7917	27.7479	28.1687	28.0142	0.139083	0.213339	0.390343	EEF1A2
28.4645	28.5203	29.1949	29.0821	29.0817	28.8944	29.7216	29.3325	0.139519	0.213932	0.442129	YWHAQ
28.4855	28.62	28.697	29.4101	28.617	28.5399	28.2478	28.2553	0.139613	0.213993	-0.388142	RNPS1
28.2054	28.213	28.2473	28.3895	28.3878	28.4203	28.4753	28.2316	0.139863	0.214525	0.114972	U2SURP
28.702	28.0944	29.6835	29.2892	30.0786	29.3289	29.5653	29.4174	0.140073	0.214594	0.655305	COTL1
28.0505	28.0554	28.7489	27.8991	29.0329	28.2001	28.6273	28.6293	0.139984	0.214632	0.4339	ARPC2
25.3475	26.082	26.3136	25.4421	24.1362	25.5686	25.0862	25.5802	0.140052	0.214717	-0.703515	WDR46
24.9632	25.0162	27.7274	25.8281	24.209	23.7905	25.6883	24.6616	0.140492	0.215607	-1.29638	PIR
25.076	24.9385	25.1676	25.2458	24.0569	25.0308	24.9403	24.8236	0.140767	0.215738	-0.394065	FAM208A
24.2968	25.9073	25.3251	20.3801	22.3845	20.5541	20.1254	23.1062	0.14076	0.215861	-2.43474	MGST2
21.9535	22.0589	22.8877	22.2312	21.5007	21.8242	19.6712	22.1314	0.141026	0.21636	-1.00095	C19orf25
23.8316	24.2516	24.6575	24.4212	25.3941	24.9293	24.2819	24.5652	0.141575	0.21727	0.502145	LACTB2
24.5388	24.5301	24.3679	23.6893	24.1053	23.6967	23.4777	24.1164	0.141637	0.217289	-0.432539	SCO2
23.6386	23.5964	23.6241	23.8369	23.5144	24.069	24.0583	24.0454	0.14198	0.217739	0.247754	MAN2B1
30.4845	30.5572	30.6424	30.3726	30.5928	30.2624	30.2985	30.0073	0.142746	0.218928	-0.223922	PRDX5
23.918	23.8603	23.0795	22.3117	22.8814	22.768	21.4303	22.6664	0.142852	0.21894	-0.855905	XPNPEP3
26.3016	26.1678	26.0468	26.4117	26.001	25.7262	26.2665	26.021	0.144144	0.220587	-0.228341	MPST
20.7444	20.738	21.7164	21.0253	20.8527	22.0571	22.5642	21.6332	0.143929	0.220609	0.720767	UBAC1
22.2708	21.5041	22.3815	22.4543	18.6565	21.4697	21.7689	21.5464	0.143992	0.220643	-1.29233	LMTK2
27.3947	26.9432	27.8339	27.5254	27.4547	26.4673	27.1908	26.5199	0.144125	0.220683	-0.516177	DAZAP1
23.0225	23.1052	23.2761	23.2251	23.0712	23.418	23.628	24.3166	0.144075	0.220731	0.451228	NEDD8-MDP1;NEDD8;MDP1
24.8683	24.8501	25.3146	24.6787	25.072	24.47	23.8566	24.4156	0.144816	0.221647	-0.474383	NDUFAF3
23.6304	22.9282	24.5779	23.9923	24.5148	24.0473	24.7784	24.3226	0.144798	0.221741	0.63358	ABCF3
26.0498	26.373	27.0128	26.7291	26.2361	26.3067	26.1097	26.0561	0.144973	0.221842	-0.364032	APEH
24.1581	25.8401	25.0017	22.2026	20.7188	24.8986	20.7787	22.4144	0.144957	0.221915	-2.09798	TOMM6
23.1027	22.4577	19.7003	23.3679	23.3163	23.6576	23.7328	23.5846	0.145201	0.222025	1.41573	ADRM1
30.5902	30.4734	30.8271	30.9891	30.323	30.6173	30.5082	30.548	0.145244	0.22204	-0.220835	SYNCRIP
22.8182	23.4161	23.7601	23.4156	23.6351	23.364	24.2019	24.0363	0.1452	0.22215	0.456839	PYGM
29.4345	29.6055	29.6067	29.5615	29.9385	29.8626	29.4365	29.7584	0.145377	0.222178	0.196939	DHX15
29.3189	29.1956	28.4769	28.5084	28.4477	28.7944	27.8125	28.4275	0.145693	0.222567	-0.504398	SEC22B
21.7761	24.5811	23.8699	25.1316	24.5226	25.6945	24.9765	25.3547	0.145889	0.222719	1.29739	TXNL1
24.1816	26.3063	27.1629	24.9533	24.2763	25.179	21.4382	24.591	0.146468	0.223365	-1.77992	C19orf53
24.6271	23.5885	24.9441	24.2474	23.888	22.5095	23.3772	24.3579	0.146826	0.22366	-0.818622	MDC1
25.3165	25.1274	25.9578	25.7545	26.1289	26.0861	25.5465	25.9481	0.146767	0.223664	0.388351	CUL3
22.5677	22.0195	22.9769	23.1331	22.7323	23.3233	23.3795	23.1848	0.14703	0.224054	0.480696	DAXX
23.055	22.5792	24.622	24.3933	23.1416	22.739	21.5944	23.0802	0.147357	0.22429	-1.02358	SH3BGRL3
21.9155	21.1606	21.7891	21.0634	20.5349	23.9718	23.7386	23.1241	0.147707	0.224407	1.36018	LSM14B
25.3312	25.8291	26.565	26.2958	26.0414	25.171	25.3845	25.1495	0.14753	0.224476	-0.568693	APOBEC3B
23.6359	23.6462	22.3411	22.0545	22.5586	21.9584	21.5625	22.4217	0.147868	0.224662	-0.794129	TMTC3
24.8895	24.9072	24.8701	24.7319	24.9891	25.0057	24.9422	24.8325	0.148207	0.225164	0.0926824	NUPL1
22.4129	22.5936	22.5595	23.9542	20.8336	22.2518	22.2384	22.6424	0.148593	0.225544	-0.888475	WBP2
25.9357	25.7157	26.0742	25.9361	26.4434	26.7542	26.0101	25.8762	0.148792	0.225553	0.35552	RAB3GAP2
28.079	28.2546	28.2934	28.9143	27.4293	27.7029	28.3433	28.2044	0.14872	0.225561	-0.465352	DDX39B
25.9757	25.9624	25.4114	25.1147	25.27	24.8569	25.1031	25.5362	0.148546	0.225585	-0.42449	HIBADH
23.6957	23.6835	24.5305	24.3061	20.5611	23.1504	23.0993	24.1448	0.148963	0.22583	-1.31508	CUL4B
22.4297	22.5306	21.5805	21.3404	21.4938	21.5846	20.8522	21.6339	0.149141	0.225936	-0.579205	COQ5
25.1349	24.8739	27.1443	27.1245	27.6539	26.833	27.2494	26.8236	0.149698	0.226863	1.07055	FKBP1A;FKBP12-Exin;FKBP12-Exip2
20.7855	21.872	21.3964	21.9588	19.4839	19.9247	21.351	21.4861	0.150298	0.227669	-0.941743	PEX11B
31.5959	31.5644	31.1208	31.1739	31.2498	31.2357	30.3188	30.9908	0.150437	0.227739	-0.414966	PRDX3
21.7171	22.4069	22.8072	22.8452	21.1398	22.4521	22.2142	20.5877	0.150592	0.227949	-0.845639	MRPL34
23.6468	23.659	23.825	22.4454	23.7164	20.6187	20.1038	22.9718	0.150931	0.228401	-1.54137	NUDT19
24.0552	23.7262	22.4949	22.7721	22.8987	22.6678	20.0228	22.4284	0.151197	0.228613	-1.25766	UBAC2
24.4487	23.862	25.4889	25.6823	27.382	26.9172	25.1121	24.9962	0.151518	0.228761	1.23141	RSU1
27.285	27.2348	27.1126	27.0505	27.2193	27.2179	27.3954	27.2991	0.152154	0.228858	0.112211	RRP1B
23.0045	25.2941	24.0805	23.4373	22.1941	21.9556	22.1001	24.46	0.151509	0.228889	-1.27665	EXOSC8
25.3328	25.9612	25.8702	26.1794	25.9443	26.6105	26.0376	26.2822	0.152099	0.228984	0.382776	NOL6
24.4345	24.7163	23.7355	25.3357	22.6821	23.2241	23.9813	24.7069	0.151985	0.229062	-0.90688	TTC38
26.3635	26.6074	27.4367	27.159	27.3712	27.63	27.3947	26.9971	0.152756	0.229111	0.456589	ARCN1
23.4079	23.515	23.3452	23.3382	22.3406	22.7398	22.4956	23.8212	0.152094	0.229111	-0.552273	PTBP3
24.8044	26.04	26.4846	24.7545	24.852	24.8797	24.4801	24.9284	0.152845	0.229174	-0.735819	SLC7A2
22.4416	23.15	23.9816	23.6521	24.3543	28.2863	24.0325	23.8375	0.151966	0.229189	1.82132	UBE2R2
21.565	21.8157	23.452	24.1294	24.2854	24.0985	24.0829	23.0047	0.152749	0.229207	1.12733	UBE2T
23.9399	24.181	24.6185	24.5188	24.8748	24.4459	24.6026	24.5246	0.152922	0.229231	0.297444	PIN4
21.4558	22.2711	21.8072	22.3732	22.2815	22.4904	22.6808	22.0865	0.152052	0.229239	0.407987	MVD
22.7842	21.8878	20.5172	21.3928	22.7046	22.3847	22.8376	21.9979	0.151882	0.229272	0.835717	TACC3
27.1605	27.3477	27.6172	27.4352	26.9198	27.2266	27.2556	27.3113	0.152742	0.229333	-0.211828	RBM12B
23.2311	22.1698	23.5665	23.1028	23.4788	23.0158	23.9827	24.2388	0.152665	0.229381	0.661463	RPP25
23.3418	23.442	23.9256	23.3336	22.8404	23.3707	23.1033	23.4406	0.151871	0.229384	-0.32201	MPDZ
24.3343	23.7032	24.1951	24.2584	22.6839	24.2391	23.4315	23.7895	0.152546	0.229386	-0.586757	ORC3
24.7061	25.2447	26.009	25.2411	24.8289	25.2899	24.0998	24.5907	0.152503	0.229464	-0.597918	LRPAP1
24.6128	24.6231	23.3269	23.7373	22.828	23.4809	23.2598	24.0427	0.153297	0.229628	-0.67217	TMUB1
22.7898	23.3637	23.1058	23.3065	22.6247	20.165	20.6723	23.6651	0.15328	0.229682	-1.35965	PVRL2
23.6971	23.0314	23.3707	23.0603	23.4828	23.5271	23.864	23.4733	0.153227	0.22972	0.296953	CCDC55;NSRP1
22.9999	22.9648	22.7105	22.1277	23.8009	22.2216	24.1634	23.7145	0.153452	0.229779	0.774347	GTPBP3
24.8714	23.8719	24.7841	24.9431	25.932	25.0151	25.4271	24.5869	0.153656	0.22987	0.622614	PPIG
26.7824	26.7046	27.3231	27.3404	27.8241	27.4612	27.3733	27.0303	0.154247	0.230059	0.384605	CNDP2
22.6292	22.5935	22.539	22.7478	23.984	22.7155	22.8885	22.8578	0.153799	0.230107	0.484047	IQGAP3
22.8113	23.0009	22.3746	22.5127	22.402	22.6109	21.9354	22.4315	0.153883	0.230119	-0.329883	METTL15
20.9522	20.9124	21.2955	21.3312	22.2713	22.09	20.7815	21.6331	0.154213	0.230152	0.571141	DPH1
24.442	23.8541	24.5856	23.7864	23.8952	23.7133	21.6319	23.6939	0.154396	0.230201	-0.933393	PTDSS1
27.455	23.5054	20.9381	27.6602	27.8286	27.4339	27.142	27.8257	0.154091	0.230217	2.66784	C2orf80
27.764	27.747	27.8827	27.0091	27.2111	27.4743	26.7316	27.3174	0.154064	0.230324	-0.417107	DDX50
24.9485	25.7561	25.6978	25.7662	24.9204	24.3416	25.7013	24.9775	0.154567	0.23037	-0.556948	THOC7
19.6551	21.1179	19.6499	22.4087	22.0073	22.1747	22.3816	21.0168	0.154814	0.230673	1.1872	MLLT4
29.093	29.3304	29.4494	28.9951	29.3283	29.3776	29.5071	29.3793	0.155205	0.231081	0.181123	PGAM5
26.5348	26.3851	26.4182	26.4779	26.3286	26.5007	26.2045	25.8244	0.15518	0.231136	-0.239416	MTA1
27.4017	27.8617	27.6676	28.3313	28.6243	27.9361	28.4239	27.9663	0.155414	0.231242	0.422057	SKP1
23.7112	23.3038	24.3517	23.871	25.2845	23.5987	24.8887	24.2493	0.15563	0.23143	0.695871	WDHD1
25.3072	24.9657	25.2684	25.0513	25.1519	25.3943	25.3124	25.3823	0.155784	0.231614	0.162112	RACGAP1
25.5774	25.8071	26.0221	27.0436	26.6101	26.6085	27.0005	26.4597	0.155905	0.231836	0.557121	PSMB3
25.3614	25.5779	25.8722	25.5366	26.4031	25.5034	27.3229	25.8046	0.156642	0.233553	0.671479	TUBG1;TUBG2
27.2626	27.1501	27.3269	27.4236	27.4035	27.7546	27.2654	27.5032	0.157203	0.234398	0.19088	BOP1
21.5388	21.0509	21.3859	21.2178	21.582	21.1482	22.2082	21.8495	0.157661	0.235122	0.398656	BAP1
27.5497	27.6665	27.4605	27.1656	26.7086	27.2274	27.5225	27.0928	0.157609	0.235155	-0.322721	NDUFA6
27.3351	27.3733	27.692	27.6218	27.3065	27.9973	28.0127	27.9412	0.15851	0.236078	0.308871	OLA1
25.7388	25.394	24.4516	25.4458	23.7038	24.5909	20.4487	25.2212	0.158459	0.236168	-1.76641	TMED2
22.3059	20.3026	20.5855	23.0337	21.1536	20.6045	18.0081	20.2977	0.1588	0.23643	-1.54098	HLA-C
31.503	31.3929	31.3673	31.3996	31.7005	31.6203	31.3228	31.5788	0.158693	0.236448	0.139857	HNRNPR
24.271	26.4526	25.123	25.5358	27.1391	26.5477	25.1804	26.4538	0.159182	0.236722	0.98462	ATAD3A
23.2375	23.6435	24.112	23.331	23.8596	23.7608	24.5947	23.8787	0.159144	0.236814	0.442425	EXOC4
27.2235	26.7787	25.6264	25.4096	27.3857	27.3791	26.3237	27.2156	0.159042	0.236825	0.816477	ALDH1L2
25.7935	27.2372	26.4089	26.6455	24.6722	26.0264	25.842	26.4437	0.159531	0.23703	-0.775187	VAMP8
26.2716	26.4252	26.6932	27.0542	27.3086	26.8579	27.1839	26.6004	0.159715	0.237122	0.376645	PREP
23.5813	23.2198	24.727	24.4699	22.3643	23.0611	24.0498	23.3224	0.159962	0.23747	-0.800094	IPO11
26.3873	26.3067	26.1282	26.6608	25.7462	26.532	25.4321	26.0998	0.160363	0.237662	-0.418225	THOC1
29.8356	29.7021	29.5339	29.4721	30.2347	29.7416	29.7868	29.7229	0.160326	0.237717	0.235559	SERBP1
23.0504	23.4483	23.7606	21.1265	23.8551	23.2982	24.442	23.8625	0.160507	0.237771	1.018	ABRACL
21.5448	20.9301	21.7371	20.3581	19.7726	20.7762	20.7769	20.697	0.160305	0.237815	-0.636826	COMMD7
25.1339	24.9784	24.9005	25.4702	25.8068	25.1402	26.4927	25.2131	0.160294	0.237831	0.542444	GDI1
26.8278	27.2393	28.2243	27.9596	28.2679	27.8358	28.4568	27.9438	0.160657	0.237852	0.563303	SNCG
22.0456	20.8991	22.479	24.56	19.8534	20.8152	22.8468	19.7754	0.161029	0.238153	-1.67323	COA4
23.733	24.2449	24.7308	23.8278	23.8215	23.603	23.6167	23.9457	0.161253	0.238228	-0.387423	DPP7
27.598	27.0933	27.7954	28.0063	28.4685	27.7797	27.9937	27.8463	0.161206	0.238357	0.39882	SRI
28.6899	28.8549	27.9351	28.399	28.4007	28.1853	27.6313	28.0074	0.161681	0.238422	-0.413531	PPA2
25.821	25.5132	25.6798	25.7601	24.5082	25.4903	25.6943	25.3618	0.161596	0.238469	-0.429878	C9orf114
29.2084	29.3993	29.3586	29.4464	29.5517	29.5045	29.4908	29.3232	0.161505	0.238508	0.114405	HEATR1
20.328	21.3463	21.1441	24.5803	24.9734	24.1697	23.1862	22.1857	0.161492	0.238587	1.77909	UCKL1
25.2817	24.679	25.4534	26.1152	26.0714	26.2299	25.4542	25.9416	0.161585	0.238597	0.54192	DHRS1
22.9928	21.1472	23.3042	23.0862	23.7247	23.496	23.3855	23.187	0.162155	0.238904	0.815664	TRAPPC4
22.4219	23.2351	23.0917	21.952	23.031	21.8965	20.4214	21.4113	0.162765	0.240013	-0.985132	ABHD12
27.1066	26.5373	25.9243	26.4506	25.9422	26.5214	23.7071	25.6717	0.16312	0.240418	-1.04408	GNA11
28.5303	28.4419	27.7514	27.5162	27.8813	27.6089	26.739	27.7286	0.163079	0.240483	-0.570493	TIMM44
25.3959	25.0606	25.3639	25.7967	24.8797	24.7041	25.5004	25.0818	0.163314	0.240486	-0.362776	CD97
23.5434	25.5101	24.445	25.8409	25.0362	26.0499	25.6824	26.3531	0.163285	0.240615	0.945525	C19orf43
26.5517	26.7046	27.1133	27.1928	27.0414	27.2032	27.6271	27.0211	0.163849	0.241173	0.332602	LSM8
23.8159	23.6811	25.0483	24.6152	25.6467	24.314	25.8779	24.5458	0.164187	0.241572	0.805989	DBNL
25.232	25.8935	24.178	23.9506	24.1458	23.8721	22.3283	24.6323	0.16418	0.241701	-1.06888	FECH
25.1234	25.3228	24.7883	25.4823	25.3402	25.0881	26.5747	26.0618	0.164621	0.242198	0.586964	RBM3
18.6701	18.4395	19.1069	19.2996	17.9856	19.909	21.7782	21.4592	0.16571	0.242825	1.40396	SMEK2
29.7266	29.3934	29.9549	29.6358	30.4732	29.6395	29.8611	30.0785	0.165118	0.242859	0.335385	HMGB1;HMGB1P1
22.5195	22.5577	21.9527	21.7695	22.441	22.4758	22.4497	22.8119	0.165523	0.242875	0.344766	NCAPG2
24.4977	24.7051	24.9766	24.6036	25.4726	24.5268	25.2827	24.9607	0.165293	0.242907	0.364952	NSUN5
27.1865	27.001	26.8212	26.4266	26.9345	26.4758	25.9767	26.4443	0.165686	0.242924	-0.400996	NDUFB9
25.6442	25.664	25.8412	26.1481	25.7219	25.769	25.2819	25.5044	0.165465	0.242965	-0.255079	CPSF3
21.5365	22.1939	22.5669	21.7312	20.2689	22.5634	20.6971	21.02	0.165435	0.242982	-0.869756	LRRTM3
24.157	23.1547	24.2441	23.637	23.4274	23.0469	22.552	23.8241	0.165516	0.243004	-0.585602	ZFP91-CNTF;ZFP91
27.9583	27.3656	27.9708	28.053	28.8179	27.9321	28.8212	27.7927	0.16607	0.243154	0.504045	CAPZA1
24.0472	24.2625	24.435	24.6801	24.2436	20.4686	23.6944	23.5664	0.166067	0.243283	-1.36294	GPD1L
29.5991	29.6275	30.4189	30.3633	30.4324	30.3348	30.6903	30.1405	0.166364	0.243683	0.397313	SRSF6
25.8664	25.8103	26.1586	25.8152	25.4589	25.6088	26.0628	25.5039	0.166345	0.243813	-0.254059	RBM19
22.5898	22.2623	21.8962	23.0329	19.9106	21.9109	20.8558	22.8324	0.166646	0.243911	-1.06789
26.2319	26.3518	27.1562	26.9224	25.927	26.0964	26.7808	25.9874	0.166817	0.24417	-0.46768	CIRH1A
32.1671	32.189	31.4866	31.4209	31.7568	31.4247	30.6154	31.4461	0.167232	0.244887	-0.505146	TRAP1
20.3976	20.5334	20.999	20.7673	21.9006	21.7666	20.323	21.1211	0.167505	0.244934	0.603508	NAB1;NAB2
25.1589	25.5959	25.4425	24.9032	23.875	24.829	25.4742	24.6412	0.167409	0.244954	-0.570263	UQCR10
23.2209	23.7405	25.2191	23.5331	23.7583	23.3617	20.9165	22.8481	0.168014	0.245126	-1.20724	CHMP1B
23.5753	23.2795	23.5331	23.6902	23.251	23.1848	19.9044	22.7191	0.168006	0.245241	-1.25471	SEC24D
25.8383	26.0479	26.5852	26.6248	25.6047	25.5802	26.4757	25.5759	0.167733	0.245249	-0.464891	NOC4L
24.7693	25.0441	25.3611	25.139	25.1648	24.384	24.9322	24.3366	0.167805	0.245251	-0.373985	EHBP1L1
22.7537	22.4189	22.6749	23.0117	22.6108	22.4746	21.044	22.3347	0.167872	0.245263	-0.598767	NDRG3
27.6536	27.3819	27.4777	27.5138	27.9614	27.6619	27.7985	27.413	0.16836	0.245338	0.20198	RRP9
24.6444	24.8793	23.876	23.8669	24.4543	24.9863	24.895	24.7258	0.168245	0.245468	0.448705	TIMM22
24.0435	24.0496	24.7393	24.7455	24.7052	24.8943	24.6245	24.6657	0.16862	0.245707	0.327942	RAP1GDS1
22.0227	22.6246	22.5762	23.5701	23.8036	23.538	22.9486	22.9308	0.168866	0.245771	0.606864	TRIAP1
23.2413	22.9348	23.9649	23.3561	22.5474	23.5453	21.0177	22.8027	0.16903	0.245887	-0.895956	GTF2E2
25.6916	25.9006	26.4709	25.2242	25.442	25.0661	25.7091	25.2374	0.169119	0.245943	-0.458203	IDH3G
23.8204	24.2554	24.7754	24.0451	23.5631	22.9756	24.4975	20.8299	0.169008	0.245966	-1.25755	GOLGA4
30.4393	30.6507	28.9478	28.6782	29.2129	28.9558	27.2764	29.0388	0.169244	0.246081	-1.05801	NNT
25.5384	25.6727	25.1743	25.5605	25.0573	25.1737	21.2257	24.6005	0.169878	0.246896	-1.47214	NDUFA11
23.8442	23.9543	21.8395	24.2964	23.9223	24.4518	24.6425	24.525	0.170208	0.247182	0.901807	TMEM63A
25.5731	25.5153	24.8759	25.0128	25.6066	25.5459	26.1096	25.2638	0.170559	0.247496	0.387231	TTN
25.0735	25.3878	25.4274	25.3485	25.1763	25.1603	25.0848	24.0614	0.171055	0.247828	-0.4386	F11R
29.2991	29.4586	29.4541	29.4671	29.7457	29.4825	29.5849	29.396	0.170989	0.247931	0.132577	ERP29
24.8793	23.571	23.9877	23.8681	23.6709	23.6078	23.1511	23.882	0.171232	0.248164	-0.498571	ACADS
23.9057	23.6215	23.1874	23.186	21.0296	23.67	23.4819	20.9917	0.172	0.249128	-1.18188	DNAJC21
25.7243	25.7819	26.6518	26.2682	25.921	25.4648	25.9842	25.4165	0.172322	0.249756	-0.40993	CTH
27.1874	27.2087	26.2637	26.3658	25.9782	26.6306	24.4872	26.5003	0.172659	0.25003	-0.85732	MRPS5
22.5417	22.7877	23.2498	22.558	23.1354	23.5278	23.9526	22.5886	0.172613	0.250069	0.516817	ATG7
26.4992	27.2301	28.0391	26.7468	26.9964	26.2431	24.2821	26.6859	0.173729	0.250876	-1.07691	DYNLL1
25.1035	25.553	24.8494	24.3779	24.183	24.952	20.5702	23.9813	0.173625	0.25094	-1.54932	YIPF5
21.4712	20.9561	21.7762	21.5663	18.1932	19.8182	20.9826	21.8129	0.173592	0.250983	-1.24071	TRMT2B
29.1491	29.0907	29.3015	28.8414	28.9863	29.0307	28.3316	28.8752	0.173571	0.251114	-0.289766	DDOST
24.9399	24.7695	24.6251	24.1605	24.4072	24.6736	23.7522	24.0441	0.174204	0.251178	-0.404473	SLC39A14
29.7067	29.106	29.7611	28.7559	28.3735	28.8018	28.0695	29.5734	0.173549	0.251227	-0.627896	RPL19
20.9882	19.524	21.7778	22.4421	20.2901	20.4547	20.0941	19.9643	0.174013	0.251256	-0.982233	MFSD5
30.7994	30.7165	30.3623	29.9901	30.3299	30.2302	29.1133	30.1142	0.173381	0.251293	-0.520177	ALDH18A1
27.7852	27.5907	28.0427	27.7956	28.5398	28.0017	27.7989	28.006	0.174201	0.251308	0.283069	MRTO4
21.2401	21.6838	21.5172	21.242	22.0176	21.2326	22.4827	21.7082	0.17353	0.251358	0.439523	PPP1R8
24.22	23.9501	23.9398	24.8015	24.1336	23.6647	23.3566	24.0773	0.174557	0.251796	-0.41981	IWS1
28.4126	28.4349	28.8575	28.5084	28.8929	28.6082	29.4782	28.6325	0.174765	0.251819	0.349626	EIF3I
25.005	24.3056	25.3882	25.331	24.7529	24.0335	24.1612	24.9935	0.174692	0.251863	-0.522201	STAM
21.2347	20.3536	20.9519	20.4296	22.3576	21.3699	21.6185	20.414	0.174828	0.251898	0.697566	BIRC6
29.8595	29.8232	29.0824	28.6168	29.19	28.9172	28.1196	28.8294	0.175163	0.252353	-0.581478	SEC63
23.4048	23.449	21.7315	23.5233	21.1185	22.0071	22.6893	22.7522	0.175249	0.252417	-0.885383	TMEM106B
27.065	27.4379	27.7549	28.2519	28.1467	27.8922	28.67	27.772	0.175347	0.252469	0.49283	FAM129B
22.8413	22.7167	22.16	21.0451	20.2415	20.9532	21.5223	22.337	0.175471	0.252529	-0.927235	POLG
23.6489	23.5094	23.3331	23.6935	23.921	23.9419	23.8052	23.4162	0.175871	0.253235	0.224856	RRP36
30.0037	30.0443	28.5131	28.5419	28.4189	28.7975	26.6615	29.0157	0.17684	0.254701	-1.05236	MT-CO2
23.9834	23.9688	24.0905	23.9009	24.1402	23.8999	23.2462	23.173	0.177174	0.254936	-0.371033	SHC1;SHC2
24.9621	24.6556	24.3527	24.2103	24.7988	23.4093	23.7925	24.1101	0.177087	0.254971	-0.517509	TRUB1
24.6241	25.2191	25.4211	24.6593	25.7234	25.2519	25.4298	25.0325	0.177562	0.255545	0.378503	CUL1
27.2858	26.7769	27.1862	26.9307	27.4456	27.2028	27.2331	27.1238	0.177887	0.255841	0.206399	TJP1
24.8166	24.9221	25.1985	26.1528	24.7013	25.3936	23.5285	24.472	0.17813	0.255942	-0.748647	ITPA
24.8312	25.3239	25.3608	25.3276	24.2299	24.9358	25.0327	25.1588	0.178347	0.255967	-0.371552	RUFY1
23.2821	22.4308	20.6601	22.6109	23.2438	23.3255	23.3558	22.6286	0.178076	0.256027	0.892468	SPATS2
22.0032	21.7037	21.882	22.9476	22.6581	22.4972	23.0828	22.283	0.178318	0.256099	0.496142	MED28
24.3511	24.6477	25.1753	24.8875	24.0365	24.8218	24.5774	23.9766	0.178731	0.256435	-0.412367	SERPINB1
24.0559	24.6538	25.5473	24.8072	23.8849	24.0447	19.542	24.3786	0.178908	0.256558	-1.8035	TMEM11
24.878	24.4006	25.0403	25.0352	25.1295	25.201	25.1612	24.8805	0.178729	0.256567	0.254558	TNKS1BP1
23.041	23.6936	22.7791	22.757	23.3711	23.7297	23.0756	23.7373	0.179293	0.25701	0.410769	STAG1;DKFZp781D1416
24.461	24.1787	25.4989	24.8053	25.3981	25.5635	25.2331	24.7693	0.179273	0.257115	0.505015	FBXO22
24.49	24.4632	24.4956	24.0471	24.8842	24.5244	25.7069	24.3391	0.179268	0.257248	0.489635	FRG1
26.0348	25.964	25.9718	26.765	25.9662	25.8323	25.4907	26.0492	0.179626	0.257823	-0.349322	IMP3
23.0545	23.2097	22.9934	22.8345	21.1203	22.9253	22.3966	22.9831	0.180085	0.258172	-0.666733	CCDC127
22.8441	22.9874	24.3653	23.4791	20.1948	21.8014	23.6406	22.9941	0.180049	0.258221	-1.26126	UBE3C
23.1618	23.1929	23.5888	22.9031	23.6422	23.4962	23.5678	23.1889	0.18046	0.258496	0.262139	DIP2B
27.3697	27.0726	27.6355	27.0829	27.9532	27.7256	27.3044	27.3964	0.180435	0.258561	0.304688	TRIM25
26.012	25.756	25.5159	26.1858	27.4247	26.0942	25.5359	28.1278	0.180685	0.258742	0.928201	CLIC4
26.642	26.7577	25.74	25.8113	26.5258	25.1425	24.9953	25.6381	0.180631	0.258813	-0.662322	MGST1
24.8199	24.5148	25.0151	24.8001	25.7017	25.3879	24.8107	24.7641	0.181047	0.259265	0.378573	STAT3
22.4745	22.7999	22.7961	22.137	22.9173	22.7252	23.5089	22.6014	0.181486	0.259757	0.386344	SCYL2
23.7957	23.0453	23.7302	23.1983	23.2947	24.0554	24.6662	23.8153	0.181462	0.259869	0.515526	ERGIC2
25.6701	25.469	25.0774	25.6973	25.9434	25.6962	25.4164	26.1335	0.181798	0.260188	0.318882	POLR1D
24.7902	25.7216	26.177	26.015	25.0707	25.4856	25.3224	24.6621	0.181741	0.260288	-0.540726	HEL-S-109;NUCB2;Nucb2
25.4712	25.271	24.6632	25.3664	26.0296	25.0173	25.7507	25.6649	0.182604	0.261386	0.42264	NFYC
23.1559	22.2313	23.0721	23.1948	23.8534	23.9611	22.5343	23.737	0.182552	0.261436	0.607892	TTI1
28.0627	27.7951	28.3514	27.9063	28.5768	28.4051	28.0639	28.1057	0.183092	0.261918	0.258984	PES1
25.3046	25.5384	25.4414	25.4626	23.7763	25.0503	25.6252	24.9445	0.183212	0.261966	-0.587667	PPIC
26.9098	26.8328	27.136	26.3769	25.9769	26.9075	26.3448	26.5203	0.183448	0.261975	-0.376522	PKP3
19.9251	20.6131	23.1502	22.4867	19.7197	19.7677	21.4801	19.9837	0.183388	0.262094	-1.30595	SMYD3
33.7129	33.7184	32.8859	33.0213	33.1655	32.9789	32.4155	33.0979	0.183928	0.262778	-0.420156	HSPA9
23.797	23.4083	23.672	23.6888	23.304	24.3713	24.7117	24.0501	0.184032	0.262842	0.467739	TRMT6
22.0569	21.7085	22.5012	21.5873	21.6039	20.7177	21.394	22.0602	0.184304	0.263164	-0.519522	PLCB4
24.7635	24.5854	24.5739	24.9299	23.4768	23.8551	25.1769	24.0983	0.18445	0.263229	-0.561421	ERLEC1
24.0019	24.3382	23.6059	23.6771	24.591	23.8339	24.735	24.0822	0.184901	0.263774	0.404741	PAAF1
17.7876	16.8705	21.537	22.7213	21.4712	21.7424	22.3669	21.9042	0.185149	0.263994	2.1421	MORF4L2
26.134	26.1969	26.5091	25.0983	25.2466	25.3378	20.9803	25.5367	0.185093	0.264004	-1.70924	NDUFB5
21.6327	21.339	21.2182	20.787	22.5638	21.2667	22.0411	21.2715	0.185478	0.264237	0.541554	PLCD3
23.18	25.4306	23.4556	25.3578	22.5805	24.5411	22.1617	23.3685	0.185372	0.264252	-1.19305	PIK3C2A
25.4653	25.956	25.1585	24.3878	24.6642	24.8239	20.528	24.4649	0.18542	0.264258	-1.62164	FKBP11
25.9612	25.8304	26.0556	26.2403	26.2642	26.3389	26.7551	25.8986	0.185772	0.264592	0.292328	SMARCE1
24.8615	24.7834	25.7576	25.3159	25.7286	25.3635	26.2373	25.2689	0.18605	0.265031	0.470006	CMPK1
24.0568	24.2409	23.9737	24.351	21.3991	24.2659	23.6529	23.5368	0.186406	0.265484	-0.941925	PGM3
24.0115	24.1623	24.1246	24.2283	24.651	23.9809	24.5781	24.272	0.186653	0.265612	0.238807	SEC23B
27.3245	27.1071	26.6004	25.8166	28.008	27.7326	26.3348	27.8074	0.186581	0.265675	0.758538	TMEM43
29.5282	29.3958	29.3618	29.5404	29.7401	29.81	29.3053	29.699	0.186882	0.265884	0.182054	DDX18
27.8726	27.731	26.8774	25.9867	26.759	26.3127	24.1377	26.7264	0.187169	0.266214	-1.13297	COX6C
31.5366	31.5052	30.9259	30.8703	31.1859	30.8303	30.5167	30.9502	0.187573	0.266885	-0.33869	HSD17B10
25.1307	25.019	25.3055	25.3143	25.3935	25.16	26.5145	25.5261	0.187709	0.266936	0.456163	SDCBP
25.0253	24.5567	24.4886	24.8181	25.3355	24.8922	26.0815	24.6169	0.187755	0.266941	0.509332	SSFA2
28.8059	28.7729	28.3321	27.8635	28.3514	28.2452	27.5987	27.9194	0.188026	0.26726	-0.414911	NDUFS1
20.2678	23.7287	25.2783	23.4956	24.4155	24.8906	25.5151	24.3909	0.188165	0.267305	1.61043	AKAP1
24.5483	24.6157	24.3074	24.0941	23.6398	24.2731	23.979	24.4253	0.188376	0.267418	-0.312092	PNPLA4
26.7767	28.6358	28.9573	27.2694	26.2498	26.7119	27.5236	27.5184	0.188594	0.267419	-0.90888	RPL36A;RPL36A-HNRNPH2;RPL36AL
27.8212	27.7441	27.9469	27.8299	27.952	27.889	28.3762	27.8734	0.188562	0.267553	0.187154	SMARCC1
22.2539	22.4808	23.6292	22.9844	23.1676	22.6288	20.3781	20.6792	0.189486	0.26855	-1.12367	SEPT8
22.8908	23.6391	24.0914	20.192	24.5973	24.3614	23.9502	23.3257	0.189598	0.26858	1.35532	TXNDC9
30.5887	30.441	30.1734	30.5511	30.3374	30.4032	30.0006	30.2511	0.18944	0.268678	-0.190452	SNRPD3
23.6967	22.9473	24.1009	23.08	24.6595	24.5404	23.5777	23.4819	0.189486	0.268685	0.608654	SDAD1
27.4998	27.6885	28.6452	28.5352	28.5385	28.3056	29.0102	28.4541	0.190202	0.268803	0.484916	WARS
24.775	24.1674	25.1581	25.4331	25.7692	25.3733	25.7393	24.7729	0.190132	0.268912	0.530249	GMFB
29.9618	29.4526	29.5521	29.9432	30.0343	29.948	30.099	29.7356	0.190181	0.268937	0.226796	DDX46
24.9157	24.7974	25.5537	25.6414	25.9517	25.5909	25.6087	25.2735	0.19006	0.269035	0.379126	SELENBP1
28.1578	28.3818	28.6203	28.2834	28.2952	28.2851	28.1209	28.0746	0.190125	0.269047	-0.166873	BCLAF1
27.7696	27.3604	27.2439	27.3973	27.7425	27.5691	27.6847	27.5145	0.19002	0.269104	0.184885	SART1
18.9149	18.9273	19.7838	18.4208	21.4909	18.9371	20.9401	18.9484	0.190486	0.269199	1.06743	MFI2
[truncated: 2,142 more rows]

## Sheet: HeLa_T487I
LFQ intensity Hela1	LFQ intensity Hela2	LFQ intensity Hela3	LFQ intensity Hela4	LFQ intensity T487I_1	LFQ intensity T487I_2	LFQ intensity T487I_3	p-value	q-value	Log2FC	Gene names
22.5859	22.6637	22.5137	22.6786	24.3274	24.2688	24.1736	1.07477e-06	0	1.64614	DPYSL3
20.5423	19.9715	20.1816	20.4111	24.0356	23.9355	24.1871	2.64425e-06	0	3.77611	DSN1
23.5883	23.3644	23.8029	23.633	19.2953	19.1847	19.836	4.69596e-06	0	-4.15847	MRPL10
28.6069	28.6402	28.6239	28.5709	28.0995	28.1415	28.1701	6.88745e-06	0	-0.473489	TOP2B
22.0404	22.2201	22.5222	22.4129	24.8736	25.05	24.8327	7.39369e-06	0	2.61986	CKS2
26.3103	26.0478	26.2005	25.9862	24.4643	24.4334	24.3301	8.48022e-06	0.004	-1.72692	C21orf33
28.7001	28.6224	28.5306	28.6351	29.9057	30.1783	30.0401	9.05565e-06	0.00342857	1.41932	CDC2;CDK1
28.3082	28.4927	28.4308	28.2746	29.5041	29.5371	29.4832	9.08755e-06	0.003	1.13156	EZR
26.0117	25.8777	26.0063	25.8799	26.8442	26.9791	26.8924	1.16497e-05	0.0133333	0.961352	BAG3
30.0655	30.0913	30.0775	29.9878	29.5025	29.4212	29.4186	1.30015e-05	0.012	-0.608103	HSD17B4
22.9155	22.5833	23.1128	22.7089	20.5073	20.5083	20.5035	1.34174e-05	0.0109091	-2.32379	UGT8
23.0567	22.6938	23.4068	23.1414	20.1174	19.9661	20.3161	2.24723e-05	0.01	-2.9415	TXNIP
31.1056	31.1539	31.2234	31.1718	30.7294	30.7218	30.7336	2.34087e-05	0.00923077	-0.435425	IMMT
23.4079	23.515	23.3452	23.3382	24.6316	24.6758	24.4338	2.42674e-05	0.00857143	1.17881	PTBP3
26.897	27.0449	27.0848	27.0473	28.0106	28.2543	28.1929	2.86634e-05	0.008	1.13411	NAMPT
27.1088	27.2994	26.9115	27.5379	24.7878	24.9902	24.8892	3.3022e-05	0.0075	-2.32531	SUCLG2
26.3516	26.3599	26.3665	26.3444	27.0584	27.2877	27.2584	3.37923e-05	0.00705882	0.845877	WDR74
23.6871	23.6779	23.658	23.5433	25.1488	24.818	24.8781	3.42873e-05	0.00666667	1.30672	RNF20
26.2385	26.1291	26.4788	26.1752	27.5592	27.7229	27.6525	3.50639e-05	0.00631579	1.38945	PTRF
22.2888	22.317	22.3614	22.4359	23.304	23.6003	23.4695	3.79095e-05	0.006	1.10714	NACC1;NACC2
27.9455	27.7778	28.0586	27.8468	28.9577	28.9014	29.0312	4.14173e-05	0.00819048	1.05626	CTNNA1
23.7394	23.7573	23.787	23.3437	21.4962	21.3647	21.7754	4.48711e-05	0.00872727	-2.11143	VAC14
27.4851	27.4105	27.5353	27.6757	24.7905	25.4066	25.3861	5.08695e-05	0.00834783	-2.33224	ALPI
25.469	25.7347	25.5797	25.2298	23.6308	23.8413	23.8239	5.55735e-05	0.008	-1.73797	NDUFS6
28.5042	28.4739	28.5145	28.4108	29.2435	29.1119	29.3313	5.72744e-05	0.00768	0.753037	DSP
28.1793	28.2356	28.115	27.7023	26.0474	25.6043	25.7875	5.74931e-05	0.00738462	-2.24499	BCAT2
20.6326	21.1063	20.7742	20.5021	22.7595	22.8233	22.6435	5.97422e-05	0.00785185	1.98824	FAM32A
21.4712	20.9561	21.7762	21.5663	18.6624	18.4482	18.8369	6.21281e-05	0.00757143	-2.79331	TRMT2B
28.2377	28.146	27.8446	27.877	26.276	25.8019	25.9063	6.59413e-05	0.00841379	-2.03159	CECR5
27.5339	27.4914	27.3142	27.3588	28.3078	28.1865	28.2952	7.07982e-05	0.00813333	0.838576	SEC31A
28.0896	28.0598	28.4282	28.2944	29.6436	29.6514	29.4686	7.27761e-05	0.00787097	1.36986	MAT2A
33.5002	33.4485	33.4993	33.4848	34.0691	34.1969	34.3114	7.7966e-05	0.008375	0.709262	EEF1A1P5;EEF1A1
27.8057	27.8017	27.5737	27.7052	28.4935	28.4797	28.5627	8.25624e-05	0.00812121	0.790367	SEPT2
26.2386	26.3793	26.3871	26.2604	25.3653	25.5939	25.3908	9.09873e-05	0.00929412	-0.866325	VPS45
22.9718	22.9066	23.223	23.1568	20.6417	21.1949	21.2111	9.13236e-05	0.00902857	-2.04863	EXD2
25.2178	24.7084	24.8343	24.3611	22.3751	22.1475	22.364	9.13886e-05	0.00877778	-2.48488	REEP6
28.3461	28.6974	28.2975	28.261	26.943	26.8017	26.6151	9.54688e-05	0.00854054	-1.61391	TMED10
27.1214	27.114	26.0971	25.8344	21.3322	20.5012	19.866	9.93422e-05	0.00831579	-5.97524	CPT2
26.6999	26.6873	26.8055	26.9438	27.68	27.8891	27.7268	0.000101762	0.00810256	0.981156	PITPNB
29.4345	29.6055	29.6067	29.5615	30.1602	30.1815	30.0906	0.00010228	0.0079	0.592017	DHX15
24.4014	24.2373	24.4389	24.5864	25.9155	26.4213	26.4314	0.000103593	0.00770732	1.84007	CDK6
25.5029	25.6092	25.4192	25.5577	26.0747	26.1407	26.1858	0.000103835	0.00752381	0.611478	GTF3C2
25.9102	25.9647	26.165	25.9263	26.7645	26.8773	26.9042	0.000111319	0.00734884	0.857088	ARPC3
22.5218	22.2801	22.5314	22.5462	21.5224	21.4108	21.6042	0.000117284	0.00809091	-0.957439	SNRNP35
30.3889	30.5776	30.7633	30.6979	31.6593	31.6811	31.6267	0.000124643	0.00791111	1.04877	CCT6A
25.5415	25.6962	26.0579	25.3149	23.6569	23.575	23.3531	0.000127104	0.00773913	-2.12429	TACO1
28.8701	28.8852	28.8257	28.7212	29.9108	29.6013	29.8487	0.000127249	0.00757447	0.961369	DNAJA1
26.7989	26.9276	26.9074	26.9222	27.3985	27.5793	27.4896	0.000128337	0.00741667	0.600145	NCAPD2
29.6229	29.7218	29.8557	30.1009	28.3741	28.4694	28.5415	0.000130939	0.00726531	-1.36366	C1QBP
32.9765	33.1644	33.2541	33.2136	34.0779	33.9513	34.1371	0.00013392	0.0088	0.903297	PRDX1
31.504	31.5407	31.4001	31.6336	30.6265	30.7421	30.4754	0.000135601	0.00862745	-0.904928	SUPT16H
25.0559	24.5958	23.9461	23.9314	20.6777	20.1628	20.8454	0.000138497	0.00846154	-3.82033	PCCA
27.7664	28.0002	27.8425	27.9285	28.6457	28.5232	28.6408	0.000139082	0.00830189	0.718861	NAA15
28.4361	28.4086	28.4338	28.3473	29.1171	29.4327	29.216	0.000142637	0.00814815	0.848818	SMC2
27.4308	27.5304	27.5868	27.7283	28.4936	28.4143	28.6389	0.000147594	0.008	0.94654	DSTN
26.2913	26.3722	26.6248	26.4881	25.5816	25.4954	25.4488	0.000155903	0.00785714	-0.935513	FAF2
28.8954	28.9694	28.9573	29.0261	29.4829	29.6864	29.6812	0.000157951	0.0077193	0.654779	PGAM1
22.5463	22.4686	22.1109	22.2231	20.5842	20.0709	19.8781	0.000162771	0.008	-2.15945	PRSS56
26.9503	27.1027	27.0538	27.0224	27.4195	27.4253	27.4812	0.000176261	0.00786441	0.409693	RPS6KA3
28.7944	29.042	28.5537	28.4642	27.0573	27.0416	26.7234	0.000176735	0.00773333	-1.7728	STOML2
27.2705	26.9981	27.9504	27.0834	24.7236	24.5571	24.1858	0.000183766	0.00760656	-2.83678	BCS1L
26.1449	26.3794	26.0703	26.1733	23.73	23.4311	24.3509	0.00018647	0.00864516	-2.35465	ANPEP
24.471	24.4962	24.3387	24.3535	23.3773	23.3281	23.6571	0.000188071	0.00850794	-0.960661	TRMT11
28.592	28.7682	28.6913	28.8647	29.7423	29.491	29.6157	0.000197844	0.009625	0.887268	MCM4
27.8422	27.8523	28.0212	27.937	28.3919	28.4309	28.4782	0.000198246	0.00947692	0.520489	DNAJB1
26.0971	26.2198	25.9424	26.0688	26.8775	26.9923	27.1586	0.000200631	0.00933333	0.927416	CDK2
23.7143	23.6452	23.7608	23.6219	23.038	23.2103	23.0327	0.000208089	0.0104478	-0.591851	VRK2
25.6821	25.5763	25.6966	25.867	26.5726	26.8143	26.9233	0.000219538	0.0102941	1.06459	BCCIP
28.5208	28.5915	28.1941	27.7995	25.9171	26.1851	26.2216	0.000220706	0.0101449	-2.16856	IDH2
27.9098	27.388	27.222	28.3487	24.8039	24.4867	24.1441	0.000224252	0.01	-3.23891	NDUFA5
30.1085	30.013	30.3098	29.9428	28.7434	29.0875	28.9107	0.00023152	0.0103662	-1.17968	RAP1B
25.8806	25.6333	25.6883	25.7887	26.562	26.3956	26.4438	0.000234577	0.0112778	0.719446	GTF3C5
26.6041	26.4154	26.5955	26.6473	27.2023	27.394	27.4143	0.000242299	0.0111233	0.771301	CARS
26.1013	25.8697	24.7326	25.4758	19.3171	21.0682	20.586	0.000244925	0.010973	-5.22108	CRAT
29.3894	29.1748	29.2562	29.1959	30.1225	29.9307	29.913	0.000258292	0.0116267	0.734653	EIF3A
29.1988	29.0985	29.027	29.0804	28.5051	28.6046	28.6543	0.000262351	0.0114737	-0.513205	HK1
24.0115	24.1623	24.1246	24.2283	25.7826	25.3001	25.2958	0.000264349	0.0113247	1.32778	SEC23B
26.107	25.9785	26.1761	26.256	26.9772	26.8847	26.7853	0.000281461	0.0111795	0.752978	SUPT6H
27.075	26.7851	26.72	26.9249	27.8622	28.0748	28.2474	0.000284547	0.011038	1.1852	OGT
28.9512	28.9464	28.9999	29.2306	29.906	29.7754	29.9963	0.000288096	0.0115	0.860543	PSMC2
20.9522	20.9124	21.2955	21.3312	22.43	22.9036	22.7141	0.000290305	0.011358	1.55973	DPH1
29.1248	28.8065	28.9595	29.1448	29.9985	29.8361	29.9083	0.000296851	0.0115122	0.905395	FEN1
29.3902	29.2613	29.4296	29.6294	30.2795	30.21	30.3447	0.000303469	0.0113735	0.850413	PSMA7
28.1696	28.2135	28.0944	28.2327	28.886	29.1278	29.2884	0.000307195	0.0112381	0.923155	PSMD4
28.4055	28.4995	28.8116	28.593	29.5684	29.8335	29.6046	0.000315558	0.0113882	1.09142	CAP1
27.4177	27.4328	27.4356	27.3043	26.8909	26.8502	27.0103	0.000317531	0.0112558	-0.48049	BMS1
24.3631	25.0817	24.563	24.2859	21.4753	21.8408	20.5853	0.000335954	0.0121379	-3.27298	PLD1
23.9927	23.8322	23.3885	22.8053	20.6781	20.7387	20.8481	0.000338092	0.012	-2.7497	ACSF2
28.5125	28.7753	28.4335	28.4617	29.3817	29.3422	29.5032	0.000362104	0.0121348	0.863282	SBDS
28.9959	28.9939	29.246	29.484	30.3874	30.6632	30.4577	0.000365319	0.012	1.32283	VCL
31.1817	31.4615	31.5035	31.5034	32.1677	32.2828	32.2383	0.000367699	0.0118681	0.817105	MYH9
23.9156	24.059	24.0549	24.007	25.3778	24.8825	25.3588	0.000374924	0.0117391	1.19722	WDR70
27.8	27.9422	28.0691	28.0973	28.7999	29.0571	29.173	0.000383605	0.0116129	1.03287	PLIN3
28.5096	28.5332	28.6146	28.6617	28.1584	28.2221	28.2158	0.000384826	0.0114894	-0.380998	VAT1
26.6995	26.9138	26.3546	26.2121	24.8789	24.9072	24.5786	0.000387785	0.0113684	-1.75677	MAN2A1
26.3026	26.3376	25.9501	25.3946	23.0429	22.4616	21.6296	0.000387981	0.01125	-3.61818	MRPS31
28.9318	29.0569	28.4627	28.5069	26.9347	27.1421	27.2563	0.000390073	0.011134	-1.62854	PYCR1
24.2527	24.4301	24.1635	24.0155	25.4368	25.3241	25.1184	0.000399967	0.0110204	1.07763	SPAG9
23.7001	23.8233	24.279	23.8227	25.3738	25.5869	25.2015	0.00040374	0.0109091	1.48112	PRKCDBP
30.4845	30.5572	30.6424	30.3726	29.8492	29.9341	29.7512	0.000418148	0.011	-0.669318	PRDX5
26.4712	26.837	26.3382	25.5845	23.6858	23.4761	23.7989	0.00042352	0.0108911	-2.65414	MACROD1
25.6318	26.4643	26.5729	26.0838	23.572	23.3473	22.5135	0.000426437	0.0107843	-3.04393	NDUFA10
24.5483	24.6157	24.3074	24.0941	22.6618	23.1419	22.817	0.000427509	0.0106796	-1.5178	PNPLA4
27.4308	27.3551	27.0269	27.139	25.9521	26.2895	26.0743	0.000439316	0.0116154	-1.1326	GRSF1
24.6587	24.6202	24.7124	24.7764	24.2339	24.3229	24.337	0.000452182	0.0119619	-0.394014	ITCH
25.5934	25.8419	25.8942	25.6903	26.5037	26.4249	26.6102	0.00045689	0.0118491	0.757989	UFC1
28.6017	28.6546	28.566	28.6555	29.0126	28.8955	29.0377	0.000468588	0.0117383	0.362466	ACTR2
31.5959	31.5644	31.1208	31.1739	29.955	30.184	30.1058	0.000472932	0.0116296	-1.28215	PRDX3
22.9548	22.6243	22.1507	22.6313	24.4313	24.1637	24.2011	0.00047815	0.0118899	1.67511	SQSTM1
26.6224	26.9701	27.0478	27.076	27.8898	27.9761	27.9549	0.000480424	0.0117818	1.01121	SUPT5H
25.3645	25.4291	24.6975	25.5201	22.9441	23.4778	23.2046	0.000505856	0.012	-2.04399	FOXRED1
26.012	25.756	25.5159	26.1858	27.2229	27.3692	27.5501	0.000513152	0.0118929	1.51328	CLIC4
25.6776	25.9435	25.2324	25.3647	23.8615	24.1106	23.7667	0.000520282	0.0117876	-1.64162	SARS2
28.1305	28.6172	28.2127	28.4538	29.3519	29.4223	29.4178	0.000544226	0.0118596	1.0438	NQO1
26.1218	26.2175	26.3565	26.321	25.058	25.4941	25.3174	0.000545339	0.0117565	-0.964384	SDHAF2
30.557	31.1247	30.4756	30.4814	28.7208	29.1924	28.6966	0.000547485	0.0116552	-1.78973	GOT2
23.1358	23.695	23.6865	23.3312	25.0583	24.747	25.1857	0.00054755	0.0115556	1.5349	STAT5A;STAT5B
24.2711	24.2384	24.3204	24.32	24.7202	24.6996	24.918	0.000548195	0.0114576	0.491801	POLR3A
23.2069	23.1166	23.0556	23.4517	24.124	24.5531	24.4725	0.000557407	0.0113613	1.17553	TNS3
27.3375	27.327	27.1425	27.1335	27.7656	27.7721	27.8793	0.000558316	0.0112667	0.570573	POLR2A
26.7617	26.5787	26.8609	26.7103	27.297	27.3938	27.2699	0.000566414	0.0111736	0.592335	CLUH
21.9016	22.2976	21.9257	22.0888	21.0932	21.0601	20.7617	0.000570896	0.011082	-1.08177	NR2F6
28.4867	28.3419	28.0184	27.8921	26.7187	26.8593	26.415	0.000581771	0.011252	-1.52042	NDUFS3
27.2786	27.419	26.4713	26.361	24.2366	23.7487	23.19	0.00058285	0.0111613	-3.15738	GLRX5
30.72	30.8159	30.8641	30.859	31.1291	31.2508	31.2319	0.000593147	0.011072	0.389131	DYNC1H1
23.3445	22.7727	22.9897	22.7243	24.7076	24.3443	24.3382	0.00059397	0.0109841	1.50559	RSBN1L
32.6725	32.7121	32.2618	32.0591	30.8938	31.0198	30.9668	0.000595716	0.0108976	-1.46622	MDH2
28.7159	28.8433	28.7653	28.611	28.0032	27.9367	28.2073	0.000595965	0.0108125	-0.684844	AP2A1
24.4242	24.418	24.866	24.6222	25.6146	25.6309	25.496	0.00059824	0.0107287	0.997919	RNF40
32.3653	32.3599	32.6087	32.6291	33.187	33.4404	33.4442	0.000599965	0.0109231	0.866427	EEF2
21.7395	21.4881	21.7929	21.6457	22.4552	22.6465	22.353	0.000605106	0.0110229	0.818361	TRIM47
26.25	26.2309	26.341	26.3063	26.7722	26.8265	26.6192	0.00061679	0.0118788	0.457206	UBR5
25.5228	25.5809	25.5726	25.3025	26.0554	26.165	26.1413	0.000620503	0.0117895	0.625859	PDE3A
22.4403	22.5743	21.8186	22.2605	20.1604	20.7011	20.0204	0.000632496	0.0122687	-1.97947	PNPLA8
25.1234	25.3228	24.7883	25.4823	26.6907	26.4893	26.5366	0.000640003	0.0121778	1.39297	RBM3
23.1373	23.2636	23.2392	22.9278	24.1429	24.5831	24.7669	0.000642812	0.0120882	1.35566	BCR
24.8419	24.9223	24.3996	24.7667	22.4024	23.1634	23.093	0.000649046	0.012	-1.84635	ITPR1
26.5935	26.3939	26.2363	26.4875	23.5014	22.4952	24.1268	0.000669928	0.0125797	-3.0533	NSDHL
25.8581	25.8819	25.8758	25.762	26.7831	26.5295	26.4104	0.000678086	0.0124892	0.729889	GPATCH4
28.0117	28.2115	28.2466	28.2455	28.7442	28.8449	28.6797	0.000700104	0.0129143	0.577446	MCM7
26.8983	26.7653	26.6183	26.7465	27.6125	27.3543	27.4061	0.000706096	0.0128227	0.700497	CBS
29.0777	28.9664	29.2586	29.2812	29.957	30.0652	29.8129	0.000708888	0.0128732	0.79906	NSUN2
24.8298	24.7102	24.9644	24.8249	25.5129	25.6327	25.3587	0.000710302	0.0127832	0.669115	EDC3
26.4282	26.3508	26.0903	25.8993	25.1689	24.9588	24.874	0.000715502	0.0129167	-1.19161	PDIA5
23.8155	23.6104	23.461	23.7857	24.7322	25.4283	25.1868	0.000727361	0.0129655	1.44762	KNSTRN
28.296	28.1911	27.9387	28.1392	28.8098	28.8918	28.7755	0.000738304	0.0135616	0.684424	DNMT1
25.1683	25.2415	23.5136	24.1225	20.7916	20.9512	20.837	0.000739237	0.0134694	-3.65156	MCU
26.8694	26.9655	27.437	27.0422	28.26	28.7886	28.8028	0.000741368	0.0133784	1.53863	PFDN1
31.699	31.9266	32.105	31.9521	32.8206	33.2545	32.928	0.000741412	0.0132886	1.08039	RAN
21.8193	22.4561	22.3084	22.3695	21.0675	20.8161	20.8585	0.000750647	0.0132	-1.32431	CCNL1
33.7641	33.8119	34.1308	34.046	34.6752	34.7227	34.7653	0.000763167	0.0131126	0.782893	HSP90AB1
30.4247	30.4351	29.9803	29.9057	28.8274	29.0321	28.7753	0.000764646	0.0130263	-1.30822	ATP5O
26.1246	25.9771	24.8735	25.2193	22.944	22.6376	23.022	0.000764738	0.0129412	-2.68077	ALDH6A1
32.6346	32.4541	32.4994	32.7794	33.329	33.1915	33.3461	0.000772088	0.0130909	0.697	AHNAK
26.176	26.1714	26.3246	25.8862	26.9872	27.1892	27.3871	0.000795216	0.0137032	1.04831	EIF2B1
22.6145	22.4995	23.2069	23.5779	25.0558	25.2	25.4351	0.000816854	0.0140513	2.25561	IL18
28.8011	28.3503	28.3605	28.5186	29.4045	29.417	29.595	0.000823957	0.0139618	0.964513	EIF3F
22.5202	22.3748	22.2666	22.7403	23.4367	23.9017	23.6416	0.000825406	0.014	1.18452	RABIF
24.3037	23.6165	23.8778	24.1353	25.5462	25.2552	25.291	0.000844256	0.0140629	1.38078	PRKAA1
25.4144	25.4028	25.684	25.3168	24.6684	24.8098	24.7457	0.000846654	0.013975	-0.713213	RNF213
28.9142	28.8867	29.2245	29.1942	30.078	29.801	29.9661	0.000849359	0.0138882	0.893485	PSMA3
28.4522	28.6389	28.4388	27.8191	26.3934	26.8865	26.5074	0.000860967	0.0138025	-1.7415	DARS2
27.7144	27.6311	27.8213	27.8865	28.325	28.6044	28.4079	0.000869224	0.0137178	0.682455	USP14
28.1537	28.228	28.3932	28.1141	27.1689	27.5204	27.4804	0.000891315	0.0137561	-0.832355	MRPL11
24.54	24.71	25.3586	24.7287	21.7304	20.8154	22.4535	0.000893252	0.0136727	-3.16792	MRPL41
23.0237	22.8261	22.6568	22.7034	21.5803	22.0179	21.8009	0.000921022	0.0140241	-1.00281	ZADH2
26.8062	27.0529	26.6713	26.4655	25.4362	25.4841	24.9185	0.000922603	0.0139401	-1.46939	SOD2
22.4984	23.0062	23.0096	22.5539	21.6037	21.5651	21.305	0.000929652	0.0138571	-1.27573	TMEM177
24.2513	24.1575	24.6907	24.3631	23.1317	23.348	23.4078	0.000960008	0.0137751	-1.06985	ITGA3
28.6193	28.541	28.6991	28.7037	29.0208	28.9377	29.0073	0.000976101	0.0142353	0.347864	SRRT
27.6034	27.6973	27.3635	27.8803	28.4631	28.6689	28.616	0.000983588	0.0143392	0.946544	PSMC1
22.8675	22.5354	22.2739	23.9089	26.0404	26.3767	25.6884	0.000988202	0.0142558	3.13874	BROX
25.7171	25.3978	24.9993	25.4963	23.759	23.7565	22.998	0.00100227	0.0141734	-1.89811	FAHD2A;FAHD2B
22.2326	21.7184	21.74	21.9006	20.6146	19.9414	20.5124	0.00100319	0.014092	-1.54173	ATP13A3
27.5733	27.5455	26.9695	26.455	23.8514	24.8622	24.4677	0.00100583	0.0140114	-2.74208	ACOT2;ACOT1
25.6475	25.4763	25.8254	25.9166	26.6053	27.1229	26.9712	0.00101409	0.0139318	1.18332	ANXA11
25.5148	25.3777	24.9176	24.8588	23.1583	23.7913	23.4848	0.00102088	0.0141243	-1.68903	GCAT
24.5598	24.6745	24.7845	24.5433	23.307	23.8747	23.6132	0.00102358	0.0141798	-1.04219	MRPL23
26.3016	26.1678	26.0468	26.4117	25.2659	25.358	25.5779	0.00102525	0.0141006	-0.83143	MPST
27.2447	27.1736	27.4677	27.2138	27.8923	27.8528	27.7745	0.00105182	0.0140222	0.564913	NARS
29.7347	29.68	29.5648	30.0664	30.5724	30.6959	30.7066	0.00106366	0.0139448	0.89683	FABP5
24.7747	24.9448	24.449	24.4023	23.6361	23.5663	23.5659	0.0010668	0.0138681	-1.05327	MRPL51
32.4093	32.4845	32.7307	32.6363	31.8832	32.0206	31.8896	0.00107156	0.0137923	-0.634076	FASN
26.4826	26.7744	26.4253	26.1241	25.1291	25.4232	25.0333	0.00107267	0.0137174	-1.25639	AK3
27.1264	27.1325	26.6288	27.0151	26.0781	25.8009	25.8175	0.00107634	0.0136432	-1.07686	hCG_1984214;MRPS17
24.398	24.5392	24.2151	23.8216	19.1619	21.4805	20.0388	0.00108032	0.0138065	-4.01641	SYNGR2
25.1375	25.3292	25.1047	24.6426	23.6255	23.952	23.6012	0.00108196	0.0137326	-1.32731	MRPS28
26.0756	26.1994	24.7456	24.893	22.0104	19.9906	20.9539	0.00108261	0.0136596	-4.4934	SLC25A3
25.9959	25.6523	25.844	25.7178	26.371	26.4712	26.4501	0.001089	0.0135873	0.62822	DHX38
25.0507	25.2151	25.1036	25.5814	26.5783	26.799	26.2512	0.00110667	0.0136421	1.30514	IRF2BP2
26.4572	26.2883	25.8788	26.1601	27.1247	27.3791	27.2447	0.00111052	0.0135707	1.0534	DIAPH1
25.8989	25.7981	25.5107	25.1096	23.5307	23.6903	24.179	0.00111673	0.0136042	-1.77935	MRPL1
22.4366	22.1554	21.0254	22.3621	24.5243	24.6902	24.613	0.00112951	0.0137824	2.61427	CKS1B
25.7788	25.451	25.607	25.4398	26.6207	26.2455	26.5655	0.00113256	0.0137113	0.908074	POLD1
32.2443	32.1868	31.9951	32.4872	32.9818	33.0908	33.0948	0.00113757	0.013641	0.827456	EIF4A1
21.3364	20.5459	20.9001	20.2836	22.5383	23.1087	22.7282	0.00115366	0.0141224	2.02521	CCDC85C
30.4963	30.5738	30.0739	29.9653	28.5166	29.0651	28.8087	0.00116204	0.0142538	-1.48054	OXCT1
23.2778	23.3023	23.668	23.2891	24.2911	24.2916	24.6821	0.00117009	0.0141818	1.03728	GNL1
20.3976	20.5334	20.999	20.7673	22.0067	22.9545	22.6689	0.001184	0.0143518	1.86905	NAB1;NAB2
25.668	25.6061	25.5708	25.5821	23.9185	23.3766	24.438	0.0012159	0.01446	-1.6957	ILVBL
27.7393	28.0267	28.159	27.9727	27.2954	27.3039	27.2713	0.00121682	0.0143881	-0.684219	PYGL
28.7597	28.8132	28.5868	29.1668	29.7364	29.8392	29.8043	0.00121908	0.0143168	0.961666	TALDO1
26.9621	26.7595	26.5292	26.3806	25.5944	25.6801	25.3725	0.00125511	0.0150542	-1.10887	MIA3
21.8677	21.8085	22.3785	22.1808	20.8973	20.6674	21.0393	0.00127643	0.015098	-1.19087	ATAD5
30.6883	30.737	30.227	30.0948	28.64	29.2101	28.7137	0.00127949	0.0150244	-1.58216	ETFA
28.3322	28.0031	28.4127	28.4884	29.1621	29.1092	29.1373	0.00127953	0.0149515	0.827047	MSH2
27.7119	27.454	26.6506	26.467	24.8061	24.5311	24.7556	0.00128455	0.0148792	-2.37328	METTL7A
29.2841	28.971	28.8873	29.1497	29.7775	29.7258	29.8372	0.00129046	0.0148077	0.707132	EIF3B
27.9728	27.8014	27.5881	27.4292	26.551	26.833	26.6593	0.00130479	0.0149856	-1.01675	ECI2
26.9738	26.9988	27.1718	27.3709	27.9278	27.9977	28.3099	0.0013054	0.0149143	0.949639	CALD1
26.9693	26.6891	26.7506	27.0279	27.6329	27.4488	27.6564	0.00134072	0.0151469	0.720163	PDLIM7
23.75	22.6861	22.8927	22.7272	25.0295	26.2162	25.8004	0.00134236	0.0150755	2.66805	NKAP
27.1001	27.1768	27.2335	27.1642	26.0385	26.4404	26.5252	0.00135184	0.0150047	-0.833981	ACOX1
26.1439	26.0737	25.455	25.5578	24.5186	24.3617	24.4641	0.00135281	0.0149346	-1.35946	SLC12A2
28.0816	28.0542	27.7127	28.0423	28.5897	28.6965	28.6967	0.00136307	0.0148651	0.688281	CUL4A
25.9763	25.5961	25.9902	25.5349	26.6288	26.8883	26.8468	0.00138566	0.0147963	1.01363	EHD4
27.3422	27.1488	26.4201	26.8076	25.2923	24.9858	24.4435	0.00140305	0.0147281	-2.02247	MRPL19
23.273	23.2473	23.4556	23.9565	24.6432	24.8226	24.8972	0.00140311	0.0146606	1.30455	TSEN34
28.7043	28.6671	29.0576	28.6813	29.4816	29.5487	29.4624	0.00140742	0.0145936	0.719994	HSPH1
26.0314	26.4129	25.7451	25.2808	24.15	24.0242	23.7872	0.0014298	0.0149818	-1.88041	ABHD10
21.3838	21.2332	21.5306	20.6996	18.9003	19.0683	19.7773	0.00146286	0.0150045	-1.96313	P4HTM
20.242	20.9722	21.6277	21.4009	18.9319	18.3439	18.5408	0.00146369	0.0149369	-2.45517	ITPR2
22.6022	22.4021	22.1937	22.2679	23.313	23.4783	23.9541	0.00147218	0.01487	1.21533	IKBKG
29.7898	29.8752	29.96	30.1772	30.6102	30.5308	30.6331	0.00148601	0.0151429	0.640806	ANXA6
28.2198	27.6765	27.8981	27.7266	26.9273	26.9408	26.6501	0.00149096	0.0150756	-1.04087	MTDH
27.193	26.7832	27.1788	27.4246	28.0988	28.3063	28.4882	0.00149902	0.0151504	1.15286	UBA2
28.1817	28.3507	28.1251	28.1998	28.6509	28.7663	28.5852	0.00150537	0.0153833	0.453157	PSMD3
24.8683	24.8501	25.3146	24.6787	23.8582	23.731	23.3598	0.00150601	0.0153158	-1.27826	NDUFAF3
24.4239	24.4466	24.5205	24.8323	25.2117	25.42	25.3497	0.00150828	0.0152489	0.771357	PPP1R12A
26.0436	25.9297	25.6603	26.2546	26.8544	27.2515	27.2483	0.00153787	0.0153043	1.14604	TXLNG
23.3045	23.1969	23.3225	23.0061	21.8665	22.4673	21.9795	0.00153997	0.0152381	-1.10306	ARMC10
24.7233	24.7446	24.3042	23.8611	22.577	22.9819	22.6279	0.00154254	0.0151724	-1.67937	RPUSD3
29.8098	29.8234	30.2544	30.1702	30.8314	30.929	30.8818	0.00154388	0.0151073	0.866258	TCP1
26.7153	26.5508	26.706	26.6844	26.9833	27.2062	27.1434	0.00155564	0.0150427	0.446814	NXF1
28.4765	28.439	28.6234	28.6388	27.8978	27.7338	28.0794	0.00155886	0.0149787	-0.640776	NDUFB10
29.7639	29.7896	29.3481	29.2137	28.5078	28.0651	28.0931	0.0015682	0.0151017	-1.30682	ECHS1
26.5111	26.8035	27.0674	26.8923	27.6646	28.0874	27.9028	0.00157141	0.015038	1.06633	CARM1
27.2953	27.4937	27.3366	27.7325	28.1842	28.266	28.1735	0.00157925	0.0149748	0.743379	PSMD6
24.0706	24.7357	25.0754	24.4378	20.9241	19.5821	21.8695	0.00158465	0.0150293	-3.78796	AGR2
26.5687	26.3169	26.3146	26.4912	27.0164	26.9579	26.8628	0.00159046	0.01505	0.522841	MAGED2
26.5642	26.6405	26.2958	26.0595	25.2603	25.4915	25.2979	0.00160395	0.0149876	-1.04011	MRPL45
23.5374	23.8038	23.2989	23.9183	25.1126	24.6329	24.9031	0.00161548	0.0150579	1.24325	RANBP3
27.8212	27.7441	27.9469	27.8299	28.4125	28.1831	28.289	0.00161801	0.0149959	0.459339	SMARCC1
26.4483	25.9524	26.2914	25.8636	25.1796	25.033	24.8694	0.00162246	0.0149344	-1.11156	BST2
25.6687	25.7345	25.4629	24.4792	22.6206	23.1894	23.1787	0.00162397	0.0148735	-2.34009	H1F0
24.8252	25.2654	25.5011	24.637	23.638	23.3769	23.0291	0.00162667	0.014813	-1.70918	SLC4A7
24.2333	23.8544	24.0793	24.0234	21.8986	21.9342	22.9096	0.00163865	0.014753	-1.80016	NEMF
27.1865	27.001	26.8212	26.4266	25.4762	25.7109	25.2179	0.00164697	0.0146935	-1.39044	NDUFB9
23.9105	23.8983	24.099	23.7765	24.4865	24.907	24.7876	0.00164984	0.0146345	0.805974	TRIM33
27.9618	27.9402	27.6708	27.1102	25.6505	26.289	25.8753	0.00165869	0.014576	-1.7325	SDHB
23.4152	22.8841	23.2807	22.9563	21.8282	22.2483	21.9392	0.0016596	0.0145179	-1.12885	PITPNM1
28.6081	28.5119	28.7911	28.6877	29.0567	29.2328	29.2224	0.001665	0.0145556	0.520946	DDX27
20.5525	20.624	19.9125	19.9682	21.8598	21.5218	21.842	0.00166708	0.014498	1.47688	SPECC1L;SPECC1L-ADORA2A
24.0311	24.6068	24.8308	24.2764	25.6297	25.8055	25.8486	0.00168522	0.0144409	1.32501	SYNM
29.4397	29.1094	28.8821	29.5614	25.2087	23.0942	25.9326	0.00168783	0.0143843	-4.50298	COX5B
31.7569	31.7561	31.7998	31.891	31.2758	31.3889	31.5064	0.0016975	0.0145	-0.41058	PHB2
28.8059	28.7729	28.3321	27.8635	26.5742	26.9486	26.4017	0.00169847	0.0144436	-1.80207	NDUFS1
30.8857	31.1012	31.37	31.2548	31.9175	32.0897	31.9012	0.00171021	0.0143876	0.816533	CCT8
30.1611	30.5878	30.5271	30.2105	29.1407	29.5438	28.997	0.00171701	0.014332	-1.14445	FH
22.5736	22.4447	22.4198	22.7484	21.9231	21.4655	21.6418	0.00171823	0.0142769	-0.869813	PROCR
21.623	21.6965	22.0109	22.085	20.9697	21.03	21.0616	0.00172572	0.0142222	-0.833436	ABHD5
33.4422	33.5408	33.7649	33.6008	34.3358	34.0808	34.1906	0.00173321	0.0141679	0.615274	LMNA
22.8049	22.4754	22.5914	22.8345	23.4065	23.8933	23.9493	0.00174465	0.0141141	1.07317	HERC4
22.9923	23.4329	23.6541	23.7265	21.8967	22.184	22.2887	0.00175125	0.014197	-1.32832	AKR1C3;AKR1C2;AKR1C4
25.1282	25.2391	25.5048	24.7518	24.0305	23.6319	23.3836	0.00175488	0.0141434	-1.47394	MRPS11
30.7097	30.7123	30.0504	29.7879	28.6404	28.62	28.2191	0.00176359	0.0141203	-1.8219	SDHA
27.4682	27.6599	27.8636	27.6854	28.7853	28.3381	28.5143	0.00178007	0.0142322	0.876592	CCDC86
27.8461	27.847	28.1222	27.9534	27.3689	27.4716	27.4847	0.00179436	0.0143284	-0.500465	SRP54
25.9757	25.9624	25.4114	25.1147	24.126	24.1204	24.007	0.00179538	0.0142751	-1.53156	HIBADH
24.4743	24.4375	24.7412	24.6531	25.4531	25.2468	25.1321	0.00180276	0.0142222	0.70083	UFD1L
23.6116	23.7389	22.9986	22.8855	21.2963	21.8735	21.5092	0.00181273	0.0143173	-1.74902	BPHL
23.5333	24.4589	23.5925	23.4522	21.7842	22.1893	21.9844	0.00182405	0.0143382	-1.77326	ECEL1
27.4184	27.162	27.5754	27.2593	26.603	26.5271	26.1834	0.00183101	0.0146081	-0.915934	FLOT1
25.048	24.7235	25.4441	25.1801	26.0794	26.4222	26.3829	0.00183561	0.0145547	1.19593	NOB1
28.3076	28.3063	28.3173	28.6874	29.0608	29.063	29.1047	0.00186516	0.0148509	0.671509	BUB3
36.0897	36.1257	35.5267	35.5868	34.5137	34.7537	34.2943	0.00186691	0.0147971	-1.31167	HSPD1
28.0038	27.6697	28.0366	27.7649	26.1489	26.9575	26.2702	0.00187952	0.0148303	-1.40989	ACOT13
27.7788	27.852	27.0482	27.1568	25.8919	26.0771	25.6766	0.00188108	0.014777	-1.5771	NDUFV1
29.2839	29.2894	28.816	28.7368	27.4788	27.9399	27.2167	0.0018906	0.0148244	-1.48639	ACADM
22.2822	22.5059	22.7093	22.6711	23.2687	23.2641	23.1889	0.00189359	0.0147714	0.698443	CHEK1
22.0533	22.1212	22.466	21.8049	23.0076	23.2227	23.1337	0.00191	0.0147189	1.00997	UAP1L1
33.9348	33.9001	33.9317	34.2739	34.7514	34.5948	34.8454	0.00191196	0.0146667	0.720404	ANXA2;ANXA2P2
29.948	29.7723	30.2047	30.3478	31.0888	31.013	30.9169	0.00192914	0.0146148	0.938035	TAGLN2
24.0859	23.8123	23.7018	24.1671	24.9297	25.3118	24.8109	0.00195851	0.0147465	1.07568	MCMBP
24.8238	25.2005	25.0225	25.1054	25.8507	26.5976	26.3021	0.00196861	0.0148632	1.2121	CPA4
22.2719	22.2716	21.1326	22.342	19.9954	19.8583	20.0111	0.00197633	0.0148112	-2.04955	ATP5S
31.5773	31.8476	32.2171	32.1316	32.9745	32.9252	32.9943	0.00197758	0.0147596	1.02124	TKT
25.8695	26.2918	26.4584	26.2511	25.2757	25.2924	25.4068	0.00198391	0.0149861	-0.892691	GAA
27.9952	27.8374	28.3295	28.1797	28.9788	28.7993	28.8529	0.00201212	0.0152249	0.791544	MSH6
28.5863	28.3235	28.5578	28.8637	29.3437	29.7041	29.4822	0.00201618	0.0151724	0.927143	ETF1
30.9757	31.0225	31.2034	31.4308	31.8494	31.8837	31.9172	0.00201836	0.0152027	0.725345	EEF1G
19.9945	20.2013	20.3432	19.4322	21.5313	21.3483	21.8954	0.00203367	0.0154521	1.59886	G6PD
25.0968	25.2938	25.3414	25.5285	25.8936	26.1725	26.1538	0.00203401	0.0153993	0.75819	GIPC1
29.133	29.3036	29.599	29.8613	30.6177	31.2817	31.3698	0.00203482	0.0153469	1.61554	TPM4
28.111	28.384	28.234	28.4669	27.4071	27.3905	27.7423	0.00204203	0.0152949	-0.785707	PCYOX1
23.8314	23.7056	22.9893	23.9456	25.1335	25.0461	25.2068	0.00204274	0.0152432	1.51085	THUMPD1
30.4151	30.364	30.7152	30.5109	29.7714	29.7943	30.0008	0.00204903	0.0151919	-0.64581	SSRP1
28.2557	28.4428	28.9796	28.7986	29.8121	30.0884	29.7245	0.00209576	0.0155168	1.25585	TXNRD1
25.7077	25.9348	26.1369	26.3362	27.5871	27.1337	27.0572	0.00210296	0.0154649	1.23044	RBM12
20.7773	20.9704	21.4426	21.4271	19.9042	19.8981	20.0925	0.0021133	0.0154133	-1.1894	NAGLU
24.6363	24.7408	25.1722	25.1661	25.8511	25.9024	26.007	0.00212169	0.0153621	0.991345	UBL4A
28.5667	28.756	28.8631	29.162	29.6264	29.9546	29.8681	0.00213445	0.0153113	0.979446	TMEM189-UBE2V1;UBE2V1
23.8108	26.7193	26.0512	27.1559	19.838	20.8459	20.9589	0.00214724	0.0153531	-5.38673	C5orf51
26.7428	26.2856	25.6628	25.5585	24.262	23.4913	23.8679	0.00215828	0.0153947	-2.1887	NDUFS4
27.328	27.4162	26.8797	27.5865	28.295	28.4116	28.3367	0.00217576	0.0154098	1.04514	PSMD14
24.9898	24.7156	25.0164	25.1326	25.8393	25.5365	25.7255	0.00221722	0.0158824	0.736849	RBM5
28.1192	28.2557	28.7338	28.1524	29.2044	29.4478	29.5507	0.00225281	0.016	1.0857	SARS
23.2564	23.185	23.0503	23.4297	23.872	23.7318	23.9628	0.00226253	0.0159481	0.625188	GAK
27.1277	27.0519	27.4854	27.2121	26.3438	26.6101	26.2665	0.00226427	0.0158964	-0.812482	KYNU
30.9088	30.7804	30.7555	30.6597	30.3983	30.4552	30.3567	0.00229595	0.0160774	-0.372722	TOP2A
21.5102	21.7294	21.4172	21.2699	22.4766	22.3164	22.1141	0.00230426	0.0160257	0.820733	BRAF;RAF1;ARAF
26.412	26.5532	25.955	26.0943	25.0608	25.2577	24.6528	0.0023049	0.0160897	-1.26317	MRPS25
27.8935	27.9185	27.9384	28.0493	27.6695	27.7382	27.6852	0.00230979	0.0160383	-0.252295	MDN1
26.5509	26.4946	26.8739	26.9181	27.4401	27.7559	27.5153	0.00233864	0.016535	0.861084	CAPN2
28.238	28.5702	28.5868	28.3884	29.1491	29.5046	29.1161	0.00235658	0.0164825	0.810725	SMC4
23.7606	23.4841	24.0595	23.6213	24.6656	25.2451	24.8014	0.00235819	0.0164304	1.17265	NRF1
22.7971	23.3806	23.9465	23.4714	25.0596	25.18	24.8752	0.00236115	0.0163785	1.63937	SUPT4H1
25.3136	25.5662	24.5607	24.8641	22.9876	23.4492	23.5823	0.00236185	0.016327	-1.73647	COQ9
28.2344	28.431	27.2376	27.2307	25.5418	25.658	25.6861	0.0023738	0.0165141	-2.15481	PCK2
24.5815	24.5076	24.4532	24.4015	24.839	25.1842	25.0589	0.00242328	0.016675	0.541447	TAF9;TAF9B
24.7281	25.1174	25.0098	24.736	24.0634	23.7089	24.1592	0.00242622	0.0166231	-0.92065	PIGS
26.0324	26.1213	26.2123	26.3726	26.8715	26.6402	26.7793	0.00243458	0.0165714	0.57903	HN1
21.9131	21.8666	21.7345	21.7353	22.6747	22.34	22.3102	0.00244713	0.0165201	0.629263	ARFGAP2
28.174	27.8348	27.7457	27.8043	27.1803	26.8357	27.1608	0.00245284	0.0164691	-0.830819	INF2
28.0597	28.0104	27.4901	27.2925	26.2877	26.5529	26.153	0.00246467	0.0164185	-1.38197	ME2
24.9151	24.9098	25.0275	23.722	22.5437	21.8879	22.5886	0.00250301	0.0166748	-2.30352	HMGCL
28.3309	28.3238	28.4809	28.6615	29.0288	29.097	29.3672	0.00251068	0.0166239	0.715044	PSMD13
29.1028	28.8474	29.0834	28.9952	28.6291	28.5303	28.6225	0.00251374	0.0165732	-0.413209	MYO1B
29.0356	28.7609	29.0464	29.1332	29.7578	29.5027	29.6285	0.00252143	0.0167295	0.635626	EIF4G1
25.3072	24.9657	25.2684	25.0513	25.6569	25.8712	25.7769	0.00252706	0.0166788	0.620206	RACGAP1
24.4526	24.2206	24.7305	24.9446	26.1369	25.9515	25.5739	0.00254689	0.0167855	1.3004	THOP1
22.2238	22.2577	22.5394	21.9501	23.1391	23.2601	22.977	0.00254948	0.0167349	0.882712	KIF20A
22.0667	22.3002	21.4727	21.3938	20.3466	20.4054	20.1807	0.00257593	0.0166847	-1.49747	LACE1
23.2061	23.0591	23.9365	23.582	24.8444	24.707	24.7264	0.00257839	0.0166347	1.31337	STAT6
30.2123	30.4165	30.0589	29.2248	28.3415	28.2395	28.0866	0.00258482	0.0165851	-1.75561	ACAT1
29.1053	29.3403	29.6627	29.4356	30.2354	30.5061	30.1477	0.00258622	0.0165357	0.910388	PSAT1
22.6292	22.5935	22.539	22.7478	22.9643	23.2514	23.1076	0.00264993	0.016997	0.480384	IQGAP3
27.2626	27.1501	27.3269	27.4236	27.6609	27.6927	27.8108	0.00265267	0.0169467	0.430697	BOP1
27.8185	27.9347	28.0181	28.301	28.8557	28.8698	28.6256	0.00265678	0.0170383	0.765627	MCM6
25.6395	25.5953	25.5525	25.6224	24.9832	25.2641	25.2463	0.00265906	0.0169882	-0.437885	ATP1B1
25.0267	25.4726	25.6306	25.4354	24.5283	24.001	23.8599	0.0026634	0.0169384	-1.26155	MB21D1
26.3936	26.462	25.9773	25.5157	24.2062	24.7647	24.0423	0.00266556	0.0168889	-1.7494	DECR1
33.5125	33.4671	33.2579	33.6824	34.0195	34.1776	34.0719	0.00266761	0.0168397	0.609706	GAPDH
29.1436	28.9583	28.417	28.024	26.9079	27.0572	26.8799	0.00268165	0.0167907	-1.68738	OGDH
29.3108	29.4181	28.6533	28.6858	27.1434	27.3369	26.1528	0.00271125	0.016742	-2.13934	ECH1
32.1671	32.189	31.4866	31.4209	30.3774	30.5513	30.3016	0.00271234	0.0166936	-1.40578	TRAP1
22.9618	23.1854	22.3519	23.5835	24.6908	25.4319	24.8491	0.00271308	0.0166455	1.96997	EHD2
20.8972	20.5765	21.8042	19.9669	23.3952	23.2245	23.3199	0.00272239	0.0165977	2.50202	FHL2
25.243	24.9046	25.6889	25.2341	23.6605	23.8972	24.2711	0.00275529	0.0166991	-1.32471	CENPV
26.1456	26.0176	25.3334	25.7127	24.2638	24.7403	24.2608	0.00276195	0.0166514	-1.38073	MRPL4
22.5713	22.6883	22.2539	21.8799	20.2964	21.0407	20.9466	0.00278614	0.0166724	-1.58713	ADCK4
27.962	27.8298	28.3587	27.9053	28.8712	28.7361	29.0614	0.00281109	0.0167727	0.875596	RCC2
25.2998	25.645	24.7782	25.2747	24.0185	24.1899	23.9668	0.00282095	0.0167252	-1.191	NDUFA7
25.1655	25.255	24.824	24.4303	23.4361	23.7486	23.7066	0.00282783	0.016678	-1.28827	ICT1
29.7046	29.3931	29.7435	30.0497	30.6895	30.7013	30.5086	0.00283799	0.016631	0.91039	S100A4
29.697	29.7558	29.8761	29.7357	30.0589	30.0688	29.9897	0.0028557	0.0167978	0.272984	IQGAP1
25.9612	25.8304	26.0556	26.2403	26.5321	26.8168	26.7364	0.00289963	0.0172325	0.673179	SMARCE1
23.2011	23.4352	22.9163	23.8037	24.4221	24.8218	24.7393	0.00292012	0.0171844	1.32201	BRAT1
28.9728	28.8303	28.5713	28.5259	27.4185	27.9963	27.713	0.00292911	0.0171365	-1.0158	RPN2
25.4744	26.4429	25.8923	25.4924	27.3193	27.2882	27.2407	0.00293004	0.0170889	1.45726	CHMP4B
24.7706	24.572	24.6601	24.5795	25.1266	24.9601	24.9831	0.00293905	0.0170416	0.37771	SRFBP1
27.6782	28.1116	28.0885	27.9063	28.5984	28.5535	28.6444	0.0029396	0.0169945	0.652624	NAA50
29.9679	29.9054	29.4239	29.1349	28.0483	28.4317	27.8099	0.00295183	0.0169697	-1.51139	UQCRC2
26.8208	26.552	26.1648	25.982	24.8586	25.284	25.0013	0.00295361	0.016967	-1.33195	PON2
29.0269	29.2087	29.1351	29.245	29.5324	29.5988	29.8196	0.00299367	0.0170411	0.496345	MDH1
28.1216	28.0386	28.3392	28.4472	28.9424	29.0085	28.7813	0.00299528	0.0169945	0.674033	PSMB1
25.314	25.2669	25.8595	26.0746	27.1229	26.8893	26.859	0.00300508	0.0170354	1.32829	UCK2
27.5255	27.4664	27.5117	27.5489	26.9763	26.3269	26.3517	0.00300571	0.0169891	-0.961481	CDK5RAP3
26.4613	26.2734	26.182	26.93	27.4226	27.6222	27.7264	0.00304846	0.0170949	1.12875	SAE1
26.019	26.2573	26.067	25.9583	26.5268	26.8285	26.6002	0.00306915	0.0171676	0.576369	LSG1
29.7889	29.5324	29.4467	29.46	30.1724	30.1074	30.017	0.00308029	0.0172399	0.54192	PABPC4
33.485	33.4915	33.6437	33.4832	34.0275	33.7937	34.0115	0.00309454	0.0171935	0.418413	PLEC
23.7187	23.89	24.0894	23.5361	23.1226	22.9672	23.012	0.00309888	0.0171475	-0.774618	AGL
24.2332	24.5364	24.5642	24.6063	25.1709	24.9761	25.09	0.00309966	0.0171016	0.593987	IST1
27.506	27.4452	27.399	27.1664	25.4638	26.3667	26.2532	0.0031024	0.017056	-1.35126	HSD17B12
26.2564	26.4724	25.9409	25.6657	25.0192	24.5622	24.8708	0.00312513	0.0170106	-1.26647	DHRS4
26.0378	25.3301	25.6799	25.4396	27.42	26.6466	27.0057	0.00312583	0.0169655	1.40224	HAT1
26.117	26.1596	26.0496	26.2786	26.8569	27.2013	26.668	0.00314806	0.0171005	0.757509	KLC1
27.7692	27.1949	27.3716	27.335	28.3971	28.4663	28.1162	0.0031607	0.0170554	0.90883	UBE2I
30.7994	30.7165	30.3623	29.9901	29.1918	29.4105	29.1182	0.0031627	0.0170632	-1.22689	ALDH18A1
27.2341	27.465	27.4317	27.1211	26.4718	26.3544	26.791	0.0031775	0.0170184	-0.773895	RPF2
22.223	22.599	22.2547	22.3631	22.9434	23.266	22.9739	0.00321006	0.0173298	0.701166	CNPY4
26.7941	26.8242	26.8339	27.0927	27.2935	27.3293	27.372	0.00322473	0.0172846	0.445362	VPS26A
25.132	25.2493	25.3696	25.1589	24.2656	23.0414	23.5766	0.00325388	0.0173229	-1.59958	EML2
27.3519	27.1276	26.5703	26.6223	25.6027	25.7523	25.7508	0.00325578	0.0172779	-1.21609	HSDL2
29.167	29.1909	29.4328	29.1587	28.8576	28.7238	28.8027	0.00328127	0.0173264	-0.442657	ADAR
22.4051	22.1212	22.4063	22.3216	22.8505	23.4324	23.2784	0.00328309	0.0172817	0.873514	RPIA
25.914	26.1718	26.0995	25.661	24.7051	25.2616	24.773	0.00329196	0.017299	-1.04834	RTN4IP1
28.6752	28.4978	28.0233	27.9253	27.1909	27.1197	27.1312	0.00330751	0.0174087	-1.13308	MOGS
27.7686	27.8063	27.8046	27.9911	28.5434	28.2391	28.2919	0.00337455	0.0180513	0.515466	PFKP
28.2517	28.2548	28.6427	28.433	27.7594	27.3228	27.6631	0.0034057	0.0181586	-0.813778	BRIX1
29.9758	30.1066	30.0518	30.1321	30.3215	30.587	30.5453	0.00342975	0.0182245	0.418011	RPL35A
24.6228	24.9518	25.1973	24.2955	23.4096	23.4631	23.6632	0.00345179	0.0184326	-1.25488	MRPS36
25.076	24.9729	25.5599	25.0976	26.1008	25.908	26.2363	0.00345332	0.0183858	0.905113	KIF23
23.3377	23.4239	23.0393	22.3681	25.0115	24.3965	24.7034	0.00347966	0.0183392	1.66153	MAP2K3
27.0365	27.0006	27.1099	26.9453	27.2389	27.369	27.2741	0.00348705	0.0184141	0.270922	GSR
23.7047	23.6653	23.8813	23.6682	24.1231	24.0739	24.305	0.00353041	0.018801	0.437488	PRRC2A
28.3279	28.5739	28.2168	28.4564	27.7902	27.7849	27.973	0.00355094	0.0187538	-0.544364	UGGT1
25.8295	25.8819	25.8889	26.0419	26.3045	26.4938	26.7269	0.00355725	0.0187068	0.597842	NLE1
28.9547	28.9972	28.8361	28.9592	29.2094	29.3394	29.1744	0.00357004	0.01873	0.304292	VARS
24.9707	25.5417	25.8374	25.758	26.699	26.7944	26.6976	0.00357442	0.0186833	1.20339	ZYX
27.4772	27.5108	26.9475	27.1291	25.5609	26.2743	26.158	0.00358169	0.0187065	-1.26842	MRPL37
27.5315	27.541	27.4785	26.8037	25.7957	26.3239	26.0759	0.0036072	0.01866	-1.2735	SYNJ2BP-COX16;SYNJ2BP
22.4297	22.5306	21.5805	21.3404	20.1331	20.2278	19.7187	0.0036094	0.0186139	-1.94382	COQ5
26.061	25.2845	26.0804	26.169	27.2752	27.0466	27.4902	0.00361308	0.018637	1.37191	CDV3
24.5009	24.612	24.2651	24.6065	23.9103	23.9262	24.0552	0.00362287	0.0185911	-0.532221	ZW10
26.8027	27.0009	26.9389	27.1796	26.3422	26.4105	26.5523	0.00363257	0.0185455	-0.545521	MOV10
26.9982	27.2585	26.0578	26.2372	24.9747	24.8236	24.7461	0.00364391	0.0185	-1.78979	NDUFB11
29.9338	29.544	29.7513	29.7811	30.239	30.2281	30.258	0.00364433	0.0184548	0.489136	GTF2I
25.0585	25.2812	25.9592	25.5717	26.6533	26.7239	26.6048	0.00364511	0.0184098	1.19307	UBE2L3
26.8986	26.9464	26.6619	26.7412	26.1109	25.3801	25.8958	0.00364553	0.018365	-1.01644	H1FX
27.1874	27.2087	26.2637	26.3658	25.3251	25.0905	25.0682	0.00365205	0.0183204	-1.59516	MRPS5
28.3195	28.0845	28.5542	28.4034	28.8742	29.036	29.0156	0.00366917	0.018276	0.634837	LARP1
27.158	27.0137	27.2287	26.9773	27.5718	27.4237	27.6347	0.00368771	0.0183768	0.449012	ABCE1
24.0198	24.0354	23.5982	23.2869	22.2818	22.1906	22.7559	0.00371483	0.0184096	-1.32563	PNPLA6
29.3476	29.4904	29.1897	29.3762	28.7887	29.0103	28.7982	0.00375833	0.0184712	-0.485244	OPA1
29.507	29.4986	29.7861	29.7594	30.0673	30.2503	30.1632	0.00377678	0.0184269	0.522484	RBBP7
26.2295	25.7384	25.9164	25.1984	24.5991	24.3206	24.2718	0.00378356	0.0183828	-1.37348	MRPL9
24.819	25.1491	25.208	25.3242	25.7403	25.8472	26.0384	0.00381142	0.0184535	0.750263	PIH1D1
28.9114	29.102	29.6276	29.6161	30.376	30.4005	30.4622	0.00382802	0.0186381	1.09857	CRABP2
24.46	24.1416	24.4921	24.1052	24.9317	24.9024	24.9125	0.0038377	0.0186983	0.615815	PTGES3L-AARSD1;AARSD1
24.49	24.4632	24.4956	24.0471	24.9532	25.1903	25.236	0.00388155	0.0188246	0.752512	FRG1
23.6386	23.5964	23.6241	23.8369	24.112	24.2127	24.5103	0.00388829	0.0187801	0.604327	MAN2B1
21.8455	22.1416	22.4096	22.8185	23.6426	23.4238	23.7317	0.00391116	0.0187358	1.29557	NELFE
28.113	28.0861	28.1467	28.4946	28.8054	28.7498	28.8076	0.00391844	0.0187765	0.577495	PEBP1
23.6447	23.5601	23.1174	22.9731	21.4848	22.3548	21.6014	0.00397714	0.0190986	-1.51016	ATPAF2
25.9776	26.036	26.1011	26.1978	26.3363	26.5163	26.4601	0.00398397	0.0190539	0.359427	BTF3L4
26.0208	26.1966	27.0539	26.2867	24.884	24.3923	23.5737	0.0039922	0.0190093	-2.10622	NDUFA12
25.3266	25.6835	26.1058	25.4145	23.0424	24.4052	23.5323	0.00401693	0.019049	-1.97262	NADK2
21.5364	21.8466	22.3229	23.1405	24.129	24.4113	24.4228	0.00407134	0.0193209	2.10943	AGFG1
33.422	33.251	32.5125	32.6843	31.5527	31.7802	31.2831	0.00408226	0.0193689	-1.42876	ATP5B
24.0518	25.5563	25.7352	25.7734	22.9442	22.8627	22.6099	0.00409755	0.0193241	-2.47362	TMED5
28.0638	28.2849	28.5021	28.5302	29.027	29.4967	29.1365	0.00410665	0.0192794	0.87485	GLRX3
27.9689	27.9263	27.7842	27.6591	27.4305	27.3823	27.4252	0.00412563	0.0194931	-0.421979	AGPS
25.4197	25.1665	25.9072	25.5365	26.322	26.5445	26.6745	0.00413198	0.0194483	1.0062	CAB39
29.8677	30.0495	29.4473	29.0502	28.3098	28.3188	27.9702	0.00413395	0.0194037	-1.40406	DLD
28.9848	29.0923	29.4968	29.2312	29.7959	29.9664	29.8982	0.004136	0.0193593	0.685559	YARS
24.3468	24.6796	24.7836	24.6361	25.6679	26.1917	25.379	0.00416386	0.0195251	1.13469	RELA
28.6007	28.8459	28.9574	29.0491	28.2006	28.2755	28.3337	0.00416652	0.0194806	-0.593359	ERO1L
27.8337	27.7818	28.0881	28.2057	28.5549	28.9215	28.6909	0.00417968	0.0195364	0.745123	ACTR3
27.1821	27.051	27.0612	27.4642	27.7646	28.2848	28.3022	0.00418716	0.0194921	0.92761	TXNDC17
28.7322	28.5964	28.2087	28.6797	29.191	29.5308	29.6531	0.00420009	0.0195023	0.90402	SRP9
33.7429	33.5837	33.9344	34.0702	34.5609	34.4678	34.4213	0.00421267	0.0195214	0.650518	HSPA8
26.2298	26.1161	26.2754	26.0694	26.5445	26.9486	26.992	0.00423028	0.0195225	0.655708	EIF2B2
29.4437	29.3739	29.6608	29.5518	29.8834	29.9978	29.8645	0.0042345	0.0194787	0.40767	CSDE1
23.0303	22.7958	22.5016	22.8629	23.3978	23.8177	23.8752	0.00425194	0.0195247	0.899272	PRCC
25.0735	25.3878	25.4274	25.3485	24.2764	24.7218	24.675	0.00426158	0.0196779	-0.751561	F11R
25.4959	25.4487	25.6965	24.8075	24.1444	24.3431	24.0423	0.00428225	0.0196339	-1.1856	ALCAM
24.9398	24.8391	23.9878	24.3875	23.0355	23.3316	22.6206	0.0042853	0.0195902	-1.54265	ALDH5A1
27.259	26.9815	26.5558	26.5382	25.7181	24.7204	25.3282	0.00430254	0.0195467	-1.57811	MRPS27
29.0961	29.2192	28.511	28.0996	27.0043	27.373	26.8952	0.00430884	0.0195033	-1.64064	DLAT
25.142	25.1321	25.2196	24.9728	23.9905	24.5784	24.4214	0.00433207	0.0197611	-0.786492	TCIRG1
31.2678	31.2418	31.7418	31.8189	32.5598	32.3073	32.5413	0.00434565	0.0198499	0.951876	TPM3;DKFZp686J1372
24.3842	24.2105	24.6484	24.4106	24.9845	25.5555	25.2752	0.00437802	0.0199031	0.858303	PSMG2
29.2803	29.1943	29.6264	29.57	30.1116	30.2409	29.9766	0.00444781	0.020378	0.691987	MYL12A;MYL12B;MYL9
23.5421	23.7569	24.0011	24.3956	24.8944	25.6268	25.6201	0.00446425	0.0205088	1.45647	QRICH1
24.2623	24.4583	24.1392	23.6135	22.7103	23.076	23.0833	0.00449032	0.0204639	-1.16175	RAB30
25.0786	25.3672	24.9531	25.7221	26.2132	26.9265	26.5904	0.00455621	0.0206288	1.29643	UCHL3
23.3795	23.9946	24.8032	24.4504	22.0199	22.287	22.5369	0.00456807	0.0208366	-1.87563	ISOC2
28.547	28.6963	29.2135	29.3828	30.013	30.2005	30.4115	0.00458173	0.0207913	1.24844	NASP
23.6705	24.2404	23.9087	23.8961	22.7481	21.0911	21.3765	0.0045982	0.0208156	-2.19039	FAM177A1
23.3851	23.3452	23.3581	23.7096	23.9115	24.2208	24.0711	0.0046423	0.0209351	0.618333	ATF7IP
25.9827	25.751	26.4579	26.2803	27.0763	27.0876	26.9431	0.00470322	0.0209935	0.917726	PACSIN2
29.5202	30.1197	30.1417	29.6375	28.2721	28.8266	27.733	0.00470406	0.0209483	-1.57754	COX5A
29.0584	28.9162	29.1217	29.6171	30.2269	30.0388	30.0108	0.00474319	0.0210065	0.913793	PRMT1
23.8973	26.0182	25.7823	25.448	22.5467	22.2988	22.7047	0.00476516	0.0211073	-2.7697	SSR3
23.5856	23.4588	23.8212	23.5408	22.5169	23.0212	22.946	0.00479176	0.0211135	-0.77355	ALG2
27.7919	27.7811	27.7281	27.7824	27.8932	27.9678	28.0489	0.00479386	0.0210684	0.199128	CDK11B;CDC2L1;CDK11A
27.0952	27.2174	26.9013	27.0202	26.0653	26.4619	26.54	0.00480497	0.0210235	-0.702777	CKMT1A;CKMT1B
26.0313	24.7581	25.3918	24.6908	22.7349	23.463	21.9643	0.0048147	0.0210809	-2.49728	SQRDL
27.972	27.5293	27.2741	27.0647	26.2737	26.4247	26.2941	0.00481524	0.0210361	-1.12916	SUCLA2
27.2199	27	27.2172	27.1596	27.7849	28.1389	27.6074	0.00482557	0.0209915	0.694545	EGFR
23.6954	23.0181	22.9212	23.3268	24.172	24.4691	24.2505	0.00482631	0.0209471	1.05683	DUS3L
28.9486	29.133	29.512	29.097	29.9121	29.8237	29.8528	0.00485241	0.020903	0.690238	PSMA1
29.4023	29.9427	30.104	29.7538	29.032	28.7106	28.8596	0.00490595	0.0212295	-0.933296	AIFM1
30.1017	30.2054	29.9474	29.8505	30.4545	30.5784	30.7604	0.00494455	0.0212353	0.57154	RPL38
26.2449	25.6396	26.421	26.2703	25.014	25.0682	25.2715	0.00494886	0.0211908	-1.02606	ACSL1
27.4657	27.3918	27.4527	27.6228	27.869	27.727	27.8347	0.00495706	0.0211464	0.326966	CHERP
27.9258	27.7148	27.8458	27.6748	27.2757	26.7941	26.5442	0.00497491	0.0211691	-0.918927	EEF1A2
30.3346	30.4117	30.9182	30.6315	31.4073	31.4933	31.2287	0.00498574	0.021125	0.80242	CCT7
25.0255	25.2299	26.0127	25.4195	26.5431	26.7747	26.6349	0.00503878	0.0213139	1.22896	ARPC5
20.3629	21.1848	21.3066	21.6574	23.4368	22.4904	23.2059	0.0050467	0.0212697	1.91644	RIN1
24.6974	24.5971	24.4285	24.6673	24.91	25.0173	25.1258	0.00505095	0.0212257	0.420087	AP3M1
26.8528	27.4598	27.0333	26.2981	25.4468	25.4142	24.582	0.0050543	0.0211818	-1.76334	SCCPDH
29.183	29.0674	28.5325	28.2706	27.2221	27.6932	27.0404	0.0050885	0.0212206	-1.44477	ACAA2
30.407	30.3124	30.2061	30.3722	30.7182	30.5547	30.6302	0.00514807	0.0215802	0.309945	SF3B2
29.8298	29.7263	28.774	28.866	27.5079	27.8983	27.1444	0.00515082	0.0215359	-1.78212	ACO2
27.2546	27.2338	26.1248	26.2879	25.2094	24.7788	24.3922	0.0051578	0.0215738	-1.93184	DNAJA3
32.6788	32.6983	32.1944	31.8002	31.171	31.1799	30.9298	0.00515786	0.0215297	-1.24934	TUFM
34.8883	34.8224	33.9193	33.8629	32.6071	32.9869	32.5871	0.00516298	0.0215265	-1.64615	CPS1
26.0563	26.4257	25.6984	25.4604	24.4563	24.8874	24.4125	0.00518944	0.0215071	-1.32482	GTPBP10
25.9357	25.7157	26.0742	25.9361	26.3801	26.2824	26.4184	0.00519164	0.0214634	0.444822	RAB3GAP2
24.5512	24.4308	24.3487	24.9566	25.3165	26.09	25.8269	0.00520995	0.0214686	1.17265	DNAJC5
26.211	26.4227	25.8083	25.5339	24.7763	24.9852	24.5321	0.00521162	0.0214251	-1.22942	AK4
25.6378	25.8563	26.245	26.5199	27.227	27.5176	27.0829	0.00522475	0.0213818	1.21112	CDKN2A
26.2535	26.3908	26.9343	26.5922	27.341	27.5672	27.3491	0.00523829	0.0214032	0.876402	PPP2R2A
26.7338	26.852	27.3557	27.09	27.8063	27.7396	27.7948	0.0052538	0.0214487	0.772357	PSMC4
26.2595	25.6129	25.6675	25.9336	24.8181	24.8687	24.1123	0.00526494	0.0214538	-1.26867	MRPL53
28.7906	28.948	28.3976	28.5434	27.5036	28.0375	27.4573	0.00531153	0.0214108	-1.00375	ATP5J
27.3128	27.5012	28.0563	27.6978	28.6203	28.855	28.4475	0.00531995	0.021368	0.998953	WDR1
26.5663	26.4701	27.1449	26.9534	27.6058	27.7671	27.6956	0.00532265	0.0213653	0.905819	GNPDA1
28.5992	28.5738	27.7028	27.4834	26.3173	26.2798	26.6411	0.00532541	0.0213227	-1.67705	PC
25.7761	26.1444	26.3174	26.2545	26.7132	27.1184	27.0135	0.00534098	0.0212803	0.82526	UBR4
27.9029	27.446	27.6583	27.7319	27.0947	26.8404	27.1629	0.00535661	0.0212381	-0.65213	UFL1
29.0418	29.1202	28.4472	27.9367	27.039	27.2192	26.6932	0.00541074	0.0212356	-1.65263	TMX1
29.6506	29.5562	28.6257	28.6383	27.3466	27.7511	27.1685	0.0054464	0.0214625	-1.69561	IARS2
26.8573	26.8727	25.1071	24.9869	21.9041	21.3785	23.3848	0.00547976	0.0215385	-3.73353	L2HGDH
25.2038	25.8512	25.964	25.9136	26.667	26.8914	26.7016	0.00548732	0.0215906	1.0202	SGTA
27.5867	27.693	28.0465	27.7963	27.1922	27.2919	27.1663	0.00548877	0.0215481	-0.563789	AAAS
27.3229	26.6712	27.1264	27.0251	26.0394	24.6644	24.7808	0.00552319	0.0216392	-1.87486	CHTOP
24.7635	24.5854	24.5739	24.9299	23.8574	23.7108	24.2452	0.00555149	0.0219413	-0.77539	ERLEC1
32.6537	32.6423	32.9076	32.9891	33.2511	33.2923	33.3379	0.00558185	0.022	0.495579	ENO1
24.1272	23.983	24.1994	24.1572	24.7583	25.8001	25.615	0.00558926	0.0219571	1.27446	CRIP2
25.7507	25.9968	25.1869	24.6435	23.599	23.7675	23.7908	0.00564479	0.0219611	-1.67536	ACSF3
25.7388	25.394	24.4516	25.4458	23.8251	23.5572	23.7071	0.0056457	0.0219184	-1.56105	TMED2
26.6802	26.9767	27.2441	27.3647	27.9341	28.1763	27.8448	0.00565575	0.0219225	0.918639	MAT2B
27.4762	27.4122	27.8829	27.7966	28.431	28.2072	28.3432	0.00568024	0.022058	0.685124	CTTN
30.3497	30.4705	30.8041	30.8256	31.3245	31.5856	31.2369	0.00569347	0.0220927	0.769832	AHCY
31.5247	31.4507	31.0839	31.4228	31.8646	31.9262	31.9603	0.00572075	0.0223198	0.546514	NONO
25.7052	26.0448	25.2238	25.5468	24.1933	24.5694	23.4739	0.00577057	0.0224308	-1.55127	HINT2
26.5554	26.6262	26.9369	27.2508	27.5941	28.0429	28.138	0.00580752	0.0225182	1.0827	RNH1
24.442	23.8541	24.5856	23.7864	20.7858	22.4184	22.3313	0.00582406	0.0225211	-2.32183	PTDSS1
22.8331	22.9801	23.1289	23.0163	23.4633	24.0947	24.1562	0.00582822	0.022478	0.915093	UBE3A
19.9002	21.6983	21.6054	22.6867	24.4145	24.6365	25.0575	0.00584502	0.0226183	3.23019	NXN
31.0129	31.1138	31.5008	31.2016	31.7086	31.9728	32.0828	0.00584614	0.0225752	0.714145	PHGDH
29.341	29.6	28.6928	28.612	27.3908	27.9216	27.2098	0.00586001	0.0225323	-1.55402	IDH3A
21.4028	21.3469	20.7472	21.1336	19.9883	20.4613	20.0777	0.00586319	0.0224896	-0.981866	ITGA1
24.1031	24.0058	23.8963	24.1253	23.1466	23.6363	23.0448	0.00588899	0.0225455	-0.756734	MAVS
21.7226	22.1371	22.3666	22.5066	21.2985	20.525	20.3368	0.00590872	0.0225482	-1.46312	SQLE
26.4744	26.3995	26.4958	26.9421	27.2384	27.2502	27.2489	0.00593186	0.0227472	0.667832	STAT1
33.7129	33.7184	32.8859	33.0213	31.9248	32.2942	31.7963	0.00596955	0.0227043	-1.32948	HSPA9
25.6916	25.9006	26.4709	25.2242	24.2333	24.592	23.9943	0.00597977	0.0227068	-1.54864	IDH3G
25.7579	25.8133	25.0377	24.9069	24.227	24.0194	23.8743	0.00598231	0.0226642	-1.33873	MRPS35
30.0048	29.5465	29.0219	28.7331	27.627	27.384	26.2278	0.00599672	0.0227491	-2.24697	DLST
22.165	21.9285	21.7136	22.5199	23.4275	23.3645	22.8811	0.00602067	0.0227738	1.14261	SUGP1
27.4451	27.4844	26.8181	26.466	25.4485	25.8111	24.9342	0.00603622	0.0227313	-1.6555	FASTKD2
24.7931	24.8096	24.6585	25.4299	25.8299	25.8816	25.8438	0.00613873	0.0231061	0.928998	SAMHD1
27.1029	27.129	26.4053	26.3165	25.2442	25.7206	25.0441	0.0061426	0.0230632	-1.4021	SPRYD4
27.5627	27.4524	27.621	27.1738	27.9744	28.1491	27.9696	0.00616247	0.0232356	0.578562	LRRC47
26.2556	25.8438	26.0684	26.1602	26.5269	26.6715	26.8745	0.00616422	0.0231926	0.608996	PPP1CB
23.0477	22.7926	23.4546	23.2777	23.8038	24.0833	24.1013	0.00617689	0.0231497	0.852991	TWISTNB
30.3938	30.6133	30.1487	30.314	29.4352	29.8502	29.7249	0.00618504	0.023107	-0.697324	PRDX4
25.6956	25.88	24.5983	25.2209	23.4826	23.9408	23.7748	0.00621322	0.0234696	-1.61598	PPOX
24.5549	24.7863	25.162	24.9762	25.4892	25.6556	25.821	0.00623525	0.0234265	0.78543	KIF11
28.1956	28.1378	28.0663	27.9962	27.692	27.8276	27.8637	0.00626587	0.0235009	-0.304556	SMU1
24.7578	25.1867	25.156	24.2512	22.3788	20.2372	22.6252	0.0063333	0.0237656	-3.09086	DHRS7
28.4599	28.3912	27.318	27.3121	26.0841	26.3022	25.9785	0.00635592	0.0238976	-1.74871	TBRG4
30.3347	30.2332	30.1301	30.3272	30.0401	29.9111	29.9151	0.00642266	0.0243942	-0.300849	EIF2S1
28.3292	28.4563	28.069	27.6721	26.8985	27.3201	27.0905	0.00642295	0.0243497	-1.0286	PMPCA
28.546	28.4172	27.8707	27.7429	26.9859	27.1599	27.0771	0.00646614	0.0244873	-1.06991	HIBCH
23.4546	23.2417	23.7294	23.7882	24.1608	24.7768	24.6302	0.00648558	0.0244864	0.969116	GINS3
26.9534	27.1262	27.4935	27.0812	27.7154	27.894	28.091	0.00652764	0.0244565	0.736548	UCHL5
28.5303	28.4976	28.3809	28.5448	28.9552	28.8466	28.6953	0.00655319	0.0245714	0.343942	EIF3L
28.3676	28.5292	28.4086	27.8724	27.1927	27.6352	27.0962	0.00655882	0.0245271	-0.986436	GRPEL1
25.5546	26.1273	26.4592	26.459	27.5754	27.2055	27.2809	0.00659647	0.0244829	1.20391	PPM1G
24.9578	24.6476	25.2282	25.1869	25.5997	25.8962	25.9097	0.00667781	0.0246978	0.79675	PAPOLA
22.2276	22.1868	22.0497	22.0289	22.3516	22.5473	22.48	0.00670411	0.0246535	0.336431	SMAP2
26.7117	26.3862	26.7216	26.3326	27.248	27.0694	27.0667	0.0067067	0.0246093	0.590019	TSR1
25.7009	26.0414	26.4335	26.2921	26.8334	27.3494	27.2389	0.00681793	0.0250447	1.02362	NCAPH
24.8895	24.9072	24.8701	24.7319	25.0423	25.2462	25.1754	0.0068353	0.0250714	0.30495	NUPL1
25.0037	25.2585	25.3983	25.121	24.2794	24.0852	24.7258	0.00687129	0.0252406	-0.831939	MTX1
25.8432	26.4783	26.4653	25.9541	27.2508	26.9431	27.1804	0.00687135	0.0251957	0.939524	CBX1
27.7168	27.5835	27.8771	28.4235	29.0768	28.9434	28.7554	0.00687845	0.025151	1.02496	SFN
24.3479	23.9656	24.2061	24.8402	25.2223	26.0775	25.7098	0.00690042	0.0251915	1.32989	KDM3B
25.6194	25.8355	26.031	25.8909	26.2998	26.869	26.8968	0.00698055	0.0254867	0.844327	GNL2
26.7054	26.4102	26.7287	26.5858	27.1753	27.2958	26.9498	0.00698609	0.0254417	0.532776	TNPO3
23.4433	23.6272	24.0527	24.1053	25.1958	24.622	24.7674	0.00700572	0.0253968	1.05462	C9orf78
23.7725	23.8127	24.1419	24.1803	24.6087	24.4728	24.7687	0.00701005	0.0253521	0.639889	TELO2
25.7871	26.0944	26.0815	26.3808	26.7275	26.7233	26.7023	0.00702611	0.0253076	0.631744	SMEK1
25.4402	25.9348	26.157	25.8489	26.7542	26.6976	26.5322	0.00707364	0.0254737	0.816117	NSA2
26.2154	26.5642	25.9292	26.0355	25.452	24.9318	24.5366	0.00709041	0.0255552	-1.21261	RAP2C
27.8162	27.8743	27.8478	27.97	28.3024	28.057	28.2873	0.00710528	0.0255105	0.338552	PRPF4
26.5569	26.8001	26.5042	25.6708	24.4873	24.9825	23.4761	0.00711603	0.0255497	-2.0677	TARS2
23.1074	23.1808	23.5788	23.5238	23.8877	24.3245	24.1497	0.00714045	0.025561	0.772941	USP8
27.4379	27.1086	26.9834	27.087	26.6937	26.3225	26.1891	0.00715406	0.0255583	-0.75246	EMC1
28.542	28.6833	28.9753	28.8048	29.195	29.4224	29.2504	0.00719316	0.0255347	0.537898	TLN1
23.9402	23.695	23.6127	23.9998	24.3189	24.6014	24.3087	0.00721995	0.0256638	0.59775	TOR1B
25.7035	25.2651	25.7715	26.0731	26.4515	26.9295	26.7283	0.00722057	0.0256194	0.999804	BAT3;BAG6
27.9254	27.9622	27.2201	28.2759	25.062	26.2532	26.4122	0.00723762	0.025734	-1.93674	FDFT1
26.3739	26.3885	26.8356	26.4548	27.1618	27.0274	27.0912	0.00724035	0.0257103	0.58029	DNAJC7
29.7882	29.8043	29.1586	29.0445	28.4793	28.2119	28.4066	0.00725366	0.0256661	-1.08299	RAB2A
26.3355	26.5616	25.0785	25.0952	23.7937	23.7818	23.0856	0.00728018	0.0257045	-2.21399	FDXR
26.9144	27.0789	26.9633	27.3604	27.5405	27.9787	27.7973	0.00729848	0.0257496	0.6929	HSPA4L
24.5005	24.4011	24.0555	24.8132	25.2505	25.4475	25.1897	0.00730351	0.0257055	0.853343	FANCI
21.6002	21.4693	21.8099	21.3337	22.1597	22.2521	22.0037	0.00732899	0.0256615	0.585214	TPCN1
27.1583	27.5168	27.749	27.8964	28.4187	28.4377	28.3768	0.00734493	0.0257611	0.830952	PFDN2
26.6927	26.5737	26.5783	27.0542	27.4038	27.3459	27.2419	0.00745736	0.0259966	0.605791	NAA10
24.9822	24.9681	25.522	25.2128	25.7722	25.8883	26.09	0.00745932	0.0259524	0.745546	PBK
28.476	28.2222	28.1501	28.253	29.1561	28.6908	28.8285	0.00748271	0.0259626	0.616486	MTA2
23.6167	23.4906	23.894	23.2221	24.1825	24.545	24.3691	0.00748779	0.0259186	0.809666	ELP3
28.3583	28.4872	27.8538	27.6665	27.108	26.906	27.1342	0.00748907	0.0258748	-1.04208	HPDL
30.4413	30.3554	30.0601	29.8703	29.2009	29.6179	29.2167	0.00755012	0.0259122	-0.836637	KTN1
26.8185	26.4982	25.6743	26.5719	24.963	25.2773	24.6658	0.007553	0.0258685	-1.422	DBT
27.5348	27.664	27.5075	27.6044	27.2639	27.1512	26.84	0.00755366	0.0258249	-0.492622	SNTB2
25.3299	24.8948	24.4903	24.5062	23.4461	23.9586	23.3817	0.00756097	0.0257815	-1.20985	STEAP3
24.2902	24.5695	23.9964	24.9508	25.5049	25.7949	25.4142	0.00756289	0.0257383	1.11964	GTF2F1
25.3514	25.5966	26.0679	25.6552	26.31	26.7977	26.6724	0.00757999	0.0257822	0.925584	NRD1
25.3014	25.8394	25.0729	25.3812	24.5489	24.5731	24.6053	0.00760491	0.0257391	-0.822988	MRPL14
28.4206	28.2672	28.6094	28.4389	28.8025	29.3309	29.1805	0.00760651	0.0256962	0.670575	ARPC4-TTLL3;ARPC4
26.4665	26.5256	26.0631	26.3907	26.8249	27.2622	27.3372	0.00765502	0.0258733	0.77999	SF3A2
27.8335	27.5148	27.643	27.7309	28.1495	28.005	28.3249	0.00766101	0.0258303	0.479261	DRG1
28.2028	27.9716	28.3054	28.5997	28.9309	28.8955	29.0005	0.00768777	0.0258272	0.67239	SSB
24.799	24.7999	23.8046	24.1837	22.2876	23.2152	22.9235	0.00773249	0.0257844	-1.588	RAB27A
24.5246	24.8066	25.3002	24.7017	25.6959	26.1308	25.6724	0.00775783	0.0257417	0.999753	MOB1A;MOB1B
26.2188	27.0555	26.2771	26.4501	25.6779	25.3334	25.1948	0.00783844	0.025957	-1.09835	PRSS21
30.9448	30.8465	31.3411	31.2574	31.666	31.6927	31.8177	0.00784781	0.0259142	0.627981	CCT4
29.0151	29.0855	28.5856	28.1878	27.5484	27.789	27.2879	0.00785565	0.025911	-1.17675	ACOT9
26.3901	26.1186	25.5636	25.4891	24.1227	24.4204	24.9398	0.00785915	0.0258684	-1.39605	C2orf47
30.6548	30.5584	30.3705	30.4937	30.8606	30.9117	30.7802	0.00788432	0.0259245	0.331497	DDX17
25.8809	25.886	25.9728	25.0497	23.841	24.235	24.7266	0.007893	0.0259475	-1.4298	ABHD11
28.4579	28.6046	28.6756	28.4532	28.9713	28.9133	28.7848	0.0078935	0.0259051	0.341937	GEMIN5
28.8681	28.839	28.1729	27.9802	27.0403	27.4439	27.2352	0.00790391	0.0259804	-1.22525	GFM1
32.5961	32.5649	32.7366	32.6696	33.0828	32.8484	33.1637	0.00792083	0.025938	0.389906	HNRNPK
27.1389	27.1082	27.4323	27.2691	27.7425	27.5986	27.5998	0.00796004	0.0259609	0.409848	PRPF4B
26.9388	26.62	26.0184	25.814	24.2662	24.7611	25.1716	0.00796479	0.0259187	-1.61482	SOAT1
29.8465	30.0587	30.3585	30.256	30.7533	30.8463	30.6295	0.00798006	0.0258766	0.613119	TARS
26.8321	27.231	27.4212	26.6652	25.6892	26.263	25.4268	0.00801311	0.0259968	-1.24435	MRPL49
26.5848	26.2687	27.134	27.0872	27.6945	28.0062	27.8969	0.00801833	0.026	1.09722	PDCD5
24.7237	24.8198	25.5318	25.758	26.5695	26.4935	26.4625	0.00801994	0.025958	1.30018	MYPN
27.4961	27.2425	26.419	26.9699	25.7619	25.9991	25.4402	0.00803003	0.0259742	-1.29818	NDUFA4
22.5318	22.315	21.8264	21.8688	20.448	21.1911	21.1322	0.00810237	0.0265314	-1.21175	PDSS2
25.8969	25.8635	26.2005	25.6931	25.4251	25.1718	25.3583	0.00810463	0.0265402	-0.595084	MYO6
21.8642	21.4073	22.0176	21.7928	22.3764	22.9738	22.6456	0.00815087	0.0266132	0.894755	ARHGAP35
30.9026	30.9131	31.064	30.9456	31.1421	31.1292	31.1681	0.0081776	0.0266346	0.19013	SF3B3
25.877	24.98	24.6413	23.8813	23.0151	21.9452	22.5333	0.00817818	0.026592	-2.34701	LPCAT4
29.9292	29.8992	29.3052	28.7328	27.8196	28.2298	27.8704	0.00820681	0.0265495	-1.49331	ACADVL
30.2781	30.371	30.6387	30.8241	31.063	31.2913	31.2475	0.00822086	0.0265518	0.672644	CCT3
33.6442	33.6357	32.8925	32.5417	31.7008	31.9449	31.3267	0.00822925	0.0266178	-1.52105	ATP5A1
26.5387	26.1394	26.0993	26.1354	25.7778	25.2976	25.4303	0.00823831	0.0265755	-0.726289	POLDIP3
24.7458	24.2065	23.8116	24.178	25.1681	25.1572	25.4777	0.00824964	0.0265333	1.03221	ZMAT2
27.633	27.122	28.4464	28.0222	29.2	29.242	29.2049	0.00831256	0.0266371	1.40976	ANP32B
28.4518	28.3062	27.4705	27.3073	26.2631	26.5966	26.3258	0.00833074	0.0267468	-1.48877	CPT1A
30.9868	30.9217	31.1399	31.0775	31.382	31.2578	31.2818	0.00833106	0.0267046	0.275721	XRCC6
24.0435	24.0496	24.7393	24.7455	25.2443	25.5844	25.6163	0.00833859	0.0266625	1.08717	RAP1GDS1
31.8751	32.0462	32.1053	32.0134	32.6691	32.4461	32.29	0.00833965	0.0266205	0.458426	FLNA
24.8276	24.4628	25.0747	25.4491	25.915	26.203	25.9826	0.00835519	0.0266164	1.07998	PPME1
27.1897	27.0362	27.3376	27.3809	27.8869	27.8324	27.5638	0.0083969	0.026675	0.524933	TWF1
24.5394	23.8532	23.8779	24.9222	25.4327	25.9158	25.7181	0.00849661	0.0268652	1.39069	GTF2B
24.9572	25.3149	25.6272	25.5788	26.0427	26.3163	26.1843	0.00851815	0.0270673	0.811603	NMD3
25.8751	25.9334	25.1765	25.5811	26.5889	26.3944	26.6323	0.00852079	0.027025	0.897016	PPP2R5D
23.7861	24.0885	24.1595	23.8269	23.2124	23.5274	22.9764	0.00852823	0.0270764	-0.72649	PLS1
23.3772	23.5476	24.0872	23.6914	22.7966	22.9962	22.9013	0.00855403	0.0271838	-0.777749	ROR2
23.6043	23.1571	24.3451	24.4275	21.8553	22.617	21.536	0.00861682	0.0273468	-1.88073	UQCC2
28.0436	28.0721	27.4422	27.0411	26.0202	26.6303	26.0343	0.00862533	0.0273043	-1.42151	ALDH1B1
25.2186	25.3447	23.7244	23.7668	21.6817	22.6076	22.0824	0.0086422	0.0273364	-2.38974	NDUFAF7
23.9834	23.9688	24.0905	23.9009	24.2429	24.1461	24.2627	0.0086538	0.0272941	0.231342	SHC1;SHC2
24.5715	24.6633	25.4721	25.4285	23.3054	23.5448	24.0307	0.00867405	0.0273261	-1.40692	TXN2
30.9818	31.0125	30.7398	31.1958	31.5533	31.3807	31.6928	0.0087078	0.027358	0.559784	FUS
25.3625	25.3457	25.447	25.0096	24.4282	24.7847	24.7785	0.00881765	0.0276857	-0.627419	AP2A2
27.2788	27.6093	28.0451	27.8991	28.4591	28.675	28.5737	0.00883137	0.0276431	0.861175	PFAS
26.5707	26.4514	26.844	26.8003	26.2457	25.7444	25.6662	0.00884604	0.0276006	-0.781194	SRRM1
23.921	24.4533	23.7495	23.4745	24.7419	25.6007	25.5114	0.00893604	0.0276748	1.38512	MAP1B
21.9761	22.2197	21.633	22.3968	22.8179	23.6534	23.9176	0.00896016	0.0276937	1.40655	AXL
28.2555	28.7839	28.0613	27.63	27.2055	26.7213	26.5322	0.00897745	0.0278104	-1.36304	CYP51A1
22.7395	22.4718	22.7024	22.4941	22.9738	23.3149	23.5622	0.00898039	0.027829	0.681686	LENG9
26.8767	26.7842	27.095	27.2349	26.3165	25.8777	26.4514	0.00898397	0.0277866	-0.78245	WDR75
21.5341	21.8087	22.02	21.7543	22.4627	22.7985	22.2636	0.00899299	0.0278113	0.729021	SOWAHC
25.523	25.2596	26.1127	25.6478	26.4539	27.1112	26.6523	0.00900702	0.027769	1.10334	CDC123
29.6323	29.2575	29.3143	29.5449	29.9249	29.8243	29.9316	0.00902684	0.0277269	0.45635	RTCB
23.4653	24.1263	23.6515	24.0795	24.542	24.7504	24.6587	0.00903492	0.0277636	0.819746	INPPL1
28.6494	28.7353	28.6573	29.034	28.2281	27.3318	27.7516	0.0090606	0.02777	-0.998463	SNRPD1
25.6701	25.469	25.0774	25.6973	26.1149	26.4438	26.7909	0.00907869	0.0277281	0.971428	POLR1D
23.0701	23.0624	22.7107	23.3885	22.1975	22.4941	22.234	0.00909109	0.0278854	-0.749432	MRPS10
26.956	26.7547	26.5753	26.2947	27.2566	27.4359	27.7096	0.00912651	0.0279096	0.822217	EIF3K
27.2983	27.244	27.4429	27.1288	26.8971	26.795	27.0034	0.00912794	0.0278677	-0.380014	AHCYL1;AHCYL2
25.5384	25.6727	25.1743	25.5605	24.7702	24.2557	23.6067	0.00913881	0.0278979	-1.27564	NDUFA11
30.0037	30.0443	28.5131	28.5419	27.4501	26.9579	26.7209	0.00917439	0.028	-2.23276	MT-CO2
24.438	24.8756	24.1854	24.061	23.1249	23.6413	23.3533	0.00917481	0.0279581	-1.01687	FNDC3A
26.5062	26.3459	25.3976	25.4263	22.9286	24.4657	23.9888	0.00917559	0.0279163	-2.12465	MUT
27.0604	26.906	26.0957	25.706	24.6086	25.0801	24.1519	0.00919516	0.0278746	-1.82849	SCO1
26.1058	25.9589	25.9862	26.415	26.5862	26.753	26.6231	0.00922536	0.0281133	0.537635	GATAD2A
21.7552	20.9264	21.5554	21.7276	22.5988	22.3019	22.9086	0.00942572	0.0288155	1.11196	SMAD5;SMAD1
29.0493	29.0772	28.2983	27.9924	27.0662	27.4581	27.1504	0.00944443	0.028844	-1.37939	ATP5F1
23.9772	24.5188	23.592	23.5103	22.3869	22.9189	22.7012	0.00951705	0.0288427	-1.23054	HSD17B8
25.3405	25.6123	26.1304	25.7157	24.9596	24.7679	24.3328	0.00955495	0.0289719	-1.01296	LSM6
19.1332	21.0809	20.1434	20.477	22.4955	22.8584	21.868	0.00959175	0.0292189	2.19866	SNX17
33.3004	33.308	33.5699	33.5666	33.7975	33.8214	33.7954	0.00961104	0.0291758	0.368539	CSE1L
28.5699	28.7145	29.212	29.0467	29.528	29.7125	29.6163	0.00965603	0.0292094	0.733147	CAND1
23.3728	21.8912	23.3092	22.8115	24.6153	24.675	24.3135	0.00969823	0.0294315	1.68844	UBE2S
27.932	28.041	27.597	27.1726	26.603	26.8898	26.4204	0.00969905	0.0293882	-1.04789	HACD3
27.9133	27.8713	27.986	27.7904	27.5083	27.5746	27.7201	0.00973127	0.0293744	-0.289225	PLP2
26.883	26.7737	26.835	26.6281	26.2854	26.4301	26.5362	0.00973549	0.0293314	-0.362704	CEBPZ
29.7804	29.6115	29.8632	29.2494	30.4028	30.2009	30.3184	0.00983901	0.029716	0.681283	CD44
23.4817	23.8271	23.6097	23.7908	24.4341	24.5864	24.0376	0.00985285	0.0297135	0.675345	SUZ12
30.1524	30.3025	30.6779	30.6233	31.0009	31.0464	31.1179	0.00986876	0.0299854	0.616046	UBA1
28.6271	28.6841	29.1066	28.9604	29.4297	29.4749	29.3228	0.00991662	0.0300758	0.564555	PSMA6
25.2299	25.1729	25.3452	25.5511	24.8537	24.6799	24.9704	0.00996776	0.0301892	-0.490114	EMC2
26.6798	26.3681	26.6638	26.5708	26.9086	27.0588	26.8976	0.00998697	0.0301919	0.384365	SMARCD1
32.5879	32.5431	32.3163	32.3996	32.7094	32.8251	32.8513	0.0101018	0.0304848	0.333504	DDX5
22.8271	22.9937	22.8387	23.4174	23.5836	24.3069	24.093	0.0101335	0.0305855	0.975259	GCLC
22.5523	22.2851	22.4029	21.8693	22.9802	23.3867	22.9711	0.010154	0.0306281	0.835257	ZNF281
27.3481	27.3017	27.9777	27.6284	28.2279	28.5751	28.3358	0.0101756	0.0305838	0.815651	CTPS1
23.2511	23.6353	24.0735	23.6251	24.4274	24.5734	24.3937	0.0102414	0.030811	0.818556	CCZ1;CCZ1B
27.1641	27.465	27.1312	27.2491	26.8633	26.3894	26.7291	0.0102556	0.0307666	-0.591774	LYPLA1
29.7413	29.9912	28.8488	29.3091	28.3091	28.3512	28.1046	0.0102588	0.0307223	-1.21763	UQCRC1
28.4254	28.9002	27.6617	29.643	27.0207	25.3068	25.0079	0.0102969	0.0307644	-2.8791	COX7A2
33.0817	33.0592	32.1815	32.0633	31.0194	31.512	31.0232	0.0103054	0.0308063	-1.41156	LRPPRC
24.4286	24.318	24.6643	24.4536	24.9654	25.9945	25.6376	0.0103116	0.0308367	1.06638	BAIAP2
27.1289	27.1071	27.8535	27.3079	28.1912	28.1059	28.2561	0.0103777	0.0310215	0.835054	CHORDC1
29.4833	29.2275	29.412	29.0631	29.7436	30.0233	29.751	0.0103777	0.0309771	0.542801	HARS
27.9146	27.9074	28.6156	28.5206	29.0765	29.1148	29.3969	0.010635	0.0316234	0.956554	CDC37
24.9079	24.7543	23.6196	24.545	22.6854	23.0771	23.2298	0.0106407	0.0315783	-1.45925	MOSPD2
28.6899	28.8549	27.9351	28.399	27.2142	27.6255	27.4853	0.0106512	0.0315334	-1.02803	PPA2
31.5366	31.5052	30.9259	30.8703	30.0614	30.4874	30.2613	0.0106723	0.0314886	-0.93946	HSD17B10
22.5437	21.7917	22.181	22.1769	22.7872	22.9786	23.1402	0.0107199	0.0315121	0.79533	HUS1
31.0237	31.2094	30.2664	30.1778	29.3468	29.5742	29.3243	0.0107302	0.0315071	-1.25424	ETFB
24.1164	23.8056	24.1791	23.7901	24.5307	24.3895	24.7242	0.0107549	0.0315587	0.575333	SPECC1
28.4135	28.4066	28.3038	28.4285	28.691	28.7123	29.0813	0.0107728	0.0315141	0.440158	SRP14
26.2873	26.3542	26.5001	26.7135	25.8045	26.1062	25.8781	0.0107909	0.0314697	-0.534147	CPSF1
25.3967	25.1608	25.185	24.8529	25.8248	25.6461	25.6515	0.0108133	0.0314254	0.558632	CTNNB1
22.8424	22.7937	23.1419	23.1167	23.5129	23.9621	23.4643	0.0108823	0.0316737	0.672767	TRAF2
27.8726	27.731	26.8774	25.9867	25.1076	25.2477	24.5917	0.0110102	0.0321685	-2.13455	COX6C
25.7904	25.6135	26.0723	26.1171	26.3816	26.7049	26.9648	0.0110217	0.0321515	0.785431	MRI1
24.3661	24.4951	24.6972	24.7874	25.6181	25.0199	25.7991	0.0110676	0.032437	0.892626	GTF2F2
27.0869	26.6218	26.1165	25.8098	24.724	25.3523	24.5405	0.0111	0.0324587	-1.53649	PTCD3
23.2047	23.2647	23.2412	23.3038	23.7009	23.8388	23.4324	0.0111052	0.0324134	0.403736	MED4
26.5348	26.3851	26.4182	26.4779	26.1934	26.0387	26.2849	0.0111188	0.0323682	-0.281656	MTA1
29.4283	29.58	29.4657	29.6162	29.298	29.3345	29.2075	0.0111279	0.0323231	-0.242573	NOP58
26.6744	25.7787	26.8368	26.9468	27.753	27.8546	27.7882	0.0111355	0.0322782	1.23941	TXLNA
27.4726	27.7122	27.1027	27.1892	24.7188	26.4	25.7928	0.0112862	0.0328444	-1.73198	NIPSNAP1
27.6188	27.2526	27.6031	28.0208	28.2379	28.9525	28.6606	0.0113385	0.0328877	0.993152	ADH5
21.4183	21.8285	22.2955	22.3541	23.1288	22.8882	23.0225	0.0113523	0.0329086	1.03909	SAAL1
24.9086	24.9088	23.7125	23.4758	22.1794	22.6052	22.5181	0.011364	0.0328631	-1.81721	NT5DC2
28.0681	28.1799	27.711	27.0465	26.2777	26.3414	24.9473	0.0113663	0.0328177	-1.8959	NDUFS2
27.5883	27.7008	27.8468	27.8893	28.0626	28.5865	28.4015	0.0113686	0.0328166	0.593906	PSMD5
23.695	22.8999	23.8878	23.6269	24.396	24.9171	24.6101	0.0114066	0.032843	1.11369	NCOR2
24.0472	24.2625	24.435	24.6801	23.6447	23.6836	23.8171	0.0114276	0.0327978	-0.641056	GPD1L
29.0708	29.4643	29.3573	29.5215	29.9031	29.9224	29.7362	0.0114545	0.0328571	0.500399	MCM3
25.3712	25.1996	24.4733	24.5433	23.2518	23.9888	23.6743	0.0114555	0.0328121	-1.25855	PDPR
25.8033	26.2967	25.8917	25.7371	26.4488	27.1253	26.8012	0.0115045	0.0329479	0.859558	PSMG1
28.4671	28.1608	27.6649	27.8975	27.3179	27.2516	27.1371	0.0115855	0.0332038	-0.812031	MRPS22
26.6075	26.512	25.6351	25.4954	24.3261	24.9989	24.2656	0.0116045	0.0331913	-1.53228	ETHE1
30.677	30.6405	29.9406	29.8592	29.069	29.4337	29.1045	0.0116565	0.0332333	-1.0769	PDHA1
22.4989	22.2806	23.005	22.9733	24.2397	23.5151	24.8858	0.0116686	0.033188	1.52407	SKP2
30.6835	30.7351	30.5983	30.4995	30.3143	30.4285	30.3653	0.011684	0.033181	-0.259768	H2AFY
29.8725	29.6793	29.4372	29.8836	30.3171	30.2142	30.1441	0.011713	0.0333478	0.506984	EPRS
29.4199	29.3875	29.6441	29.5355	29.8988	29.7316	29.7926	0.0117758	0.0333894	0.310938	RUVBL1
27.0726	27.0471	26.5602	26.5068	25.8432	26.2411	25.874	0.0118085	0.0333875	-0.810579	FAR1
27.9766	27.9418	27.9617	28.4768	28.7243	28.6234	28.7238	0.0118427	0.0333857	0.601258	PSMC3
30.1433	30.2241	30.2499	30.7552	30.8792	31.0664	31.1102	0.0118968	0.0336	0.675456	FUBP1
25.8349	25.2462	24.8452	22.8406	21.7589	21.9449	21.293	0.011977	0.0337814	-3.02613	FAM162A
27.2122	26.9257	27.3574	27.3924	27.626	27.7797	27.8959	0.0119966	0.0339353	0.545296	LUC7L3
27.2738	27.4841	26.7777	26.1308	25.5693	24.6642	25.525	0.0120946	0.0342988	-1.66378	CYB5B
30.1466	30.1552	30.4123	30.364	30.576	30.7774	30.5886	0.0121116	0.0342527	0.377797	ACLY
23.45	24.4205	23.9381	24.2052	21.8291	22.9229	22.8358	0.012144	0.034298	-1.47417	RRAS
26.5663	26.2974	25.423	26.6986	27.451	27.7766	27.5301	0.012167	0.0343914	1.33956	IMPDH1
24.2745	24.2291	24.6788	24.7778	25.0296	25.6563	25.358	0.0122123	0.0345328	0.85795	WASL
24.4977	24.7051	24.9766	24.6036	25.113	25.2651	25.1694	0.0122588	0.0345668	0.486726	NSUN5
27.5973	26.7859	26.696	27.3203	27.9846	28.404	28.0822	0.012285	0.0345955	1.05706	TCEA1
32.4945	32.7044	32.963	32.8725	32.3439	31.8529	31.6428	0.0123175	0.034672	-0.812012	RPS27A;UBB;UBC;UBA52
25.61	25.174	25.5032	25.7416	26.181	26.0012	26.0612	0.0123572	0.0347217	0.573916	HSPA14
23.3222	23.5949	24.1844	23.3336	24.7508	24.5385	24.4243	0.0123852	0.0348404	0.962376	PML
28.7992	28.8885	27.5782	27.0851	26.0676	26.2356	25.6877	0.0123943	0.0347942	-2.09076	SLC25A11
23.1597	23.1146	22.6268	21.8177	20.3572	21.3396	21.1975	0.0123958	0.034748	-1.71493	SLC22A18
28.1717	27.9273	27.8168	28.4198	28.5639	28.9252	28.8877	0.0124244	0.0348132	0.708387	GLO1
20.965	21.7717	22.2105	23.1029	19.9845	20.0594	19.9582	0.0124935	0.0348677	-2.01177	MAP2K6
25.8528	25.9994	26.3097	26.2317	26.506	26.9986	26.7569	0.0125272	0.0348639	0.655406	ANXA3
21.4913	21.4078	21.4216	21.9263	20.4858	21.116	20.5401	0.0125395	0.0348813	-0.847803	NBAS
28.9852	28.4305	28.5038	29.0833	29.3592	29.699	29.6501	0.012543	0.0348353	0.818767	KPNA2
26.6922	26.5912	26.5018	26.6577	26.8787	26.8018	27.0479	0.0125459	0.0348316	0.29872	RBM26
24.2093	24.5676	23.3153	23.9058	25.2211	25.2264	25.1394	0.0126053	0.0349382	1.19608	TSTA3
25.1653	25.1338	25.7841	25.496	26.0284	26.2878	26.0737	0.0126381	0.0349239	0.735203	HSBP1
26.7586	27.0409	26.8275	25.867	25.4772	25.4644	25.4309	0.0126447	0.0348781	-1.16602	IVD
30.2387	30.0707	30.036	30.0349	29.5378	29.8134	29.8251	0.0126506	0.0348325	-0.369644	BSG
26.2932	25.9977	26.5795	26.3356	26.742	26.9299	27.021	0.0126662	0.0348078	0.596156	CORO1B
24.4939	24.1745	24.0724	24.0558	23.6362	23.5122	23.8269	0.012744	0.0349922	-0.540733	BRD3
31.7223	31.8421	31.1158	30.8582	30.1564	30.4869	30.1617	0.0127852	0.0349726	-1.11624	SHMT2
32.7189	32.7615	33.1538	33.2334	33.4511	33.795	33.6717	0.0128134	0.0349792	0.672348	PKM
25.3661	25.5208	25.1057	25.8738	24.4977	24.5948	24.885	0.012841	0.0349857	-0.807411	VPS13A
26.996	27.0743	26.6983	26.0991	25.2925	25.8387	25.6744	0.0128509	0.0349766	-1.11509	MCCC2
25.8557	25.7554	25.5364	25.4402	24.3399	25.2193	24.5685	0.0128556	0.0349313	-0.937685	PRKRA
23.8914	23.662	24.1236	21.957	20.2956	21.559	20.9027	0.0128674	0.034886	-2.4894	TMEM70
23.286	21.2506	22.8165	22.8158	24.5261	24.651	24.4405	0.0129082	0.0348409	1.99697	ARHGAP17
27.2945	27.1126	27.1421	27.2804	27.8243	27.4785	27.5236	0.0129316	0.0347959	0.401411	ZC3HAV1
24.9515	24.8897	25.3345	25.332	25.6257	25.7947	25.6438	0.0129592	0.0348748	0.561148	CTBP1
28.1132	28.2244	27.5835	26.994	26.4538	26.5733	26.3304	0.0130631	0.0351392	-1.27626	IDH3B
30.39	30.6964	30.8343	30.4138	30.1488	30.0851	30.0246	0.0130912	0.0351351	-0.497456	SFXN1
26.1454	25.3644	25.1833	26.3263	26.9492	26.9827	27.1562	0.0131077	0.03509	1.27449	PSMD7
20.6449	20.4075	19.7753	21.1995	21.574	23.2407	22.972	0.0131592	0.0351682	2.08876	ASNSD1
24.4867	24.1987	23.6853	23.4442	20.7548	22.839	20.3731	0.0131651	0.0351231	-2.63138	AFAP1
26.4878	26.5258	26.883	26.6812	26.2976	26.0171	26.1941	0.0132305	0.035283	-0.474861	EIF4A2
28.5303	28.4419	27.7514	27.5162	26.77	27.0801	26.8753	0.0132785	0.0354015	-1.1515	TIMM44
27.3239	27.5938	26.3759	26.442	25.6252	25.5894	25.4556	0.0133118	0.0354789	-1.37717	SLC25A22
22.1672	22.3594	22.4599	21.2541	23.0636	23.494	23.5823	0.0133618	0.035551	1.3198	AIDA
26.1444	26.1206	27.0083	26.9098	27.545	28.0333	27.5723	0.0133805	0.0355363	1.1711	ADK
27.3351	27.3733	27.692	27.6218	27.8873	27.8821	27.9422	0.0133847	0.0354911	0.39834	OLA1
23.8627	23.8582	23.4372	24.2758	22.4161	22.5932	23.2574	0.0134189	0.035446	-1.10289	SURF1
27.1018	27.177	27.678	26.8741	27.9167	28.0147	27.9575	0.0134293	0.035401	0.75525	CCAR2
24.1999	23.6306	22.2426	23.7387	21.4148	20.965	21.8676	0.0134346	0.0353561	-2.03717	AGO2;AGO1;AGO3
22.9999	22.9648	22.7105	22.1277	21.5123	21.9562	21.6981	0.0134474	0.0353114	-0.978582	GTPBP3
30.5146	30.3643	30.6509	30.8826	31.0484	31.0781	31.2404	0.013648	0.0358685	0.519252	TPI1
30.0499	30.1642	30.6466	30.5679	30.9749	31.0423	31.007	0.0136793	0.0358535	0.650928	STIP1
26.178	25.7212	25.9717	25.8658	26.5676	26.2837	26.4342	0.0136933	0.0358739	0.494319	DIS3
24.8275	24.3639	23.5599	24.7196	25.953	25.5306	25.6001	0.0137131	0.0358287	1.32686	VASP
25.3216	25.7384	25.4203	25.0946	26.0731	25.8768	26.1538	0.0137569	0.0359447	0.640818	LARP7
27.1372	27.3977	26.2057	25.6393	24.8652	24.8479	24.6425	0.0137795	0.0360251	-1.8098	SUPV3L1
26.0822	25.9156	26.4935	26.8616	27.2578	27.2123	27.7074	0.0138492	0.0360452	1.05425	SYAP1
22.4484	22.3534	23.075	22.8814	23.3688	24.0029	23.5566	0.0139898	0.0365614	0.953209	SRA1
22.3645	22.6875	22.4829	21.6811	23.2956	23.1924	23.3054	0.0140455	0.0365707	0.96043	NAA20
22.2892	21.8088	22.7173	22.0687	23.0409	23.2905	22.9929	0.0141384	0.03666	0.887066	TRIP10
22.3634	22.642	20.2597	22.1596	24.4074	25.2375	23.8899	0.0141521	0.0366292	2.6554	TRIM26
23.1284	23.8145	22.9202	23.7188	22.4374	22.3358	22.5059	0.0141816	0.0365835	-0.969104	PTPRF
27.3873	27.2589	28.1796	27.9029	28.962	28.7515	28.4627	0.0142587	0.0369315	1.0432	UBE2M
27.0339	27.3558	27.1959	26.5418	26.1623	26.3946	26.0734	0.0142694	0.0369254	-0.821773	GLG1
23.6348	23.6033	23.9035	23.4192	24.146	24.1169	24.0136	0.0142886	0.0369093	0.451956	CCDC50
28.038	28.1968	28.3037	28.234	28.5309	28.8873	28.5097	0.0143057	0.036938	0.449495	RDX
24.3919	24.2058	23.6026	23.6974	23.1686	23.1636	23.0643	0.0143364	0.0369566	-0.842277	GLT8D1
20.5109	20.9704	21.2008	20.2452	19.8943	19.4355	19.77	0.0143423	0.0369109	-1.0319	HPS5
23.827	23.7164	23.1087	23.9695	24.4161	24.9199	24.4894	0.0144821	0.0374438	0.953102	RAB3GAP1
27.8073	27.4991	27.5934	27.0384	26.8201	26.8145	26.5078	0.0145437	0.0375309	-0.770411	CRYZ
30.0868	30.2333	29.4639	28.9663	28.4227	28.5456	28.0819	0.0145502	0.0374846	-1.33752	SLC25A10
29.0145	28.839	29.1401	29.7354	29.9647	30.0189	30.4315	0.0145543	0.0374384	0.956116	EEF1B2
23.4354	24.2423	24.5793	24.2653	22.7907	23.2978	22.6138	0.014584	0.0374219	-1.22979	APOBEC3C
23.0975	23.2775	23.245	22.0927	21.8451	21.6077	21.6067	0.0146057	0.0374251	-1.24168	TIMMDC1
25.6047	25.1868	25.0056	25.317	21.6874	23.8183	23.7315	0.0146325	0.0373791	-2.19947	FAHD1
27.3721	27.3037	27.3848	28.0275	28.2099	28.7115	28.2746	0.0146858	0.0375343	0.876666	TPD52L2
24.9033	24.6933	24.1425	25.2728	23.0179	23.9596	23.2818	0.0146864	0.0374884	-1.33323	CPM
23.5939	23.8238	24.0634	23.9227	24.1745	24.5317	24.4983	0.0147414	0.0375306	0.550546	PRPSAP2
24.4533	24.4705	23.6354	23.4192	22.4805	22.76	22.9721	0.0147996	0.0375531	-1.25708	RDH10
32.5464	32.5819	33.0436	32.6639	33.0823	33.4912	33.4518	0.014826	0.0375902	0.632822	LDHA
27.6327	27.3204	27.4567	27.3387	27.8917	27.6713	27.8903	0.0150276	0.0381096	0.380667	UPF1
24.29	24.2935	24.3796	22.5667	20.316	22.2547	21.4592	0.0151914	0.0383406	-2.53918	BCKDK
28.1849	28.2364	28.4428	28.5396	28.704	28.7889	28.6807	0.0151969	0.038294	0.373579	TBCA
26.1226	26.0681	25.4794	25.1646	24.0863	24.9625	24.1345	0.0153368	0.0385437	-1.31428	VWA8
29.6754	30.0628	30.3456	30.1402	30.6731	30.733	30.5953	0.0153517	0.0385261	0.61117	ANXA1
29.5634	29.4871	28.7843	28.5369	27.7805	28.138	27.9625	0.0154285	0.038678	-1.13261	OAT
26.1695	26.2228	26.3138	25.8459	24.6913	25.68	25.1476	0.0154524	0.0386602	-0.965108	MRPS15
26.011	25.8307	26.6417	26.3269	25.1501	25.6188	25.0128	0.0154635	0.0387005	-0.941987	NLN
25.7225	25.8855	26.1606	26.3224	26.4986	26.6632	26.8202	0.0155909	0.0391894	0.637888	KIF2A
24.6444	24.8793	23.876	23.8669	22.7901	23.4634	22.8001	0.0156123	0.0391855	-1.2988	TIMM22
27.4672	27.7805	27.026	26.8032	25.8069	26.5305	26.0883	0.0156349	0.0391913	-1.12727	POLDIP2
27.3278	27.0534	25.6996	25.4636	24.3644	24.5959	24.0091	0.0156958	0.0391779	-2.06298	AGK
27.4605	27.2008	27.6086	27.5235	28.0128	27.7315	27.9586	0.0159394	0.0397695	0.452615	USP7
26.3256	26.3938	25.3889	25.5296	24.8902	24.8389	24.4777	0.0159567	0.0398369	-1.17391	TFB1M
29.0381	28.9905	28.7466	29.6201	29.7075	30.5561	30.2695	0.016088	0.0403689	1.07885	CACYBP
26.4581	26.7312	26.7878	26.3726	26.0912	26.1838	26.1756	0.0161429	0.0405646	-0.437189	LAP3
26.5627	26.6081	26.8567	26.5081	26.1351	26.3904	26.1638	0.0161814	0.0405161	-0.40414	SEC11A
24.4073	24.1002	23.9628	24.4059	25.1504	25.7137	24.7225	0.0161885	0.0404678	0.97649	SSU72
23.1321	23.054	23.0876	23.8316	22.3006	21.7807	22.5897	0.0162534	0.0407151	-1.05265	FYN
25.5751	26.164	24.9633	24.4957	23.6376	23.9414	23.6486	0.0162544	0.0406667	-1.55703	MIPEP
22.3255	22.3715	22.8787	22.9003	23.1718	23.8692	23.4884	0.0162819	0.0406754	0.89078	GINS4
26.5918	26.5342	26.8623	26.7873	27.0635	27.1765	26.966	0.0162847	0.0406271	0.374749	RPA1
25.3614	25.5779	25.8722	25.5366	25.9264	26.2855	26.1996	0.0162888	0.0405789	0.550145	TUBG1;TUBG2
23.0644	23.8803	23.1063	23.2472	22.7327	22.1071	22.0874	0.0163049	0.0405924	-1.01548	AUH
23.8485	23.6437	24.5513	23.068	22.4388	22.3649	22.6151	0.0163865	0.0410604	-1.30494	MARS2
27.8559	27.4855	27.7102	27.5704	27.1786	27.2636	27.3782	0.0164138	0.0410686	-0.382041	ZC3H11A
27.2604	27.1693	26.968	27.1471	25.8155	26.7768	26.2164	0.0164145	0.0410201	-0.866609	NDUFB3
27.5792	27.8898	26.8603	26.8406	25.1539	26.4653	25.2448	0.016439	0.0409717	-1.67114	ACAD9
29.7266	29.3934	29.9549	29.6358	30.4106	30.2197	30.087	0.0164391	0.0409234	0.561467	HMGB1;HMGB1P1
25.1339	24.9784	24.9005	25.4702	25.5953	26.0125	25.6968	0.0164591	0.0408753	0.647436	GDI1
29.2252	29.2886	29.0378	29.3201	28.8371	28.7698	29.0164	0.0164666	0.0408273	-0.343469	SNRPD2
27.4197	27.4891	27.9966	27.9946	28.3551	28.442	28.3658	0.0165097	0.0409108	0.66263	PSMD1
24.6042	24.3934	24.3945	25.0367	25.1064	26.0771	25.9429	0.0165149	0.0408628	1.10158	SNX12
23.666	24.2391	24.0479	22.6763	22.1689	22.3743	21.8623	0.0165905	0.0410398	-1.52217	MRPS14
31.3853	31.5381	31.7946	31.8329	32.0129	32.1594	32.1389	0.0166351	0.041048	0.466039	PGK1
26.4022	27.1856	26.5301	26.6312	26.0349	25.939	25.8903	0.0166646	0.0411776	-0.732539	MAP7
34.4014	34.5294	34.9881	34.8089	35.1908	35.3262	35.2319	0.016711	0.0412695	0.567661	HSP90AA1
24.4164	24.5391	24.3786	24.5124	24.7499	25.5683	25.2223	0.0167314	0.0413706	0.718589	DHX33
25.2422	25.5418	25.4424	25.1928	24.1859	20.3688	21.006	0.0167835	0.0414203	-3.50125	SLC11A2
23.4433	23.5068	24.0105	23.9803	24.2325	24.4982	24.5776	0.0168067	0.0414093	0.700881	DRG2
25.2509	25.5745	26.0643	25.9838	26.4085	26.603	26.5681	0.0168484	0.0413937	0.808142	USP15
20.7371	21.1665	22.924	21.1455	23.275	24.0442	23.5639	0.0168879	0.0415499	2.13444	CNOT3
23.7255	23.139	24.0421	22.8068	24.3956	24.791	24.7645	0.0169069	0.0415435	1.22206	VPS4B
24.0098	24.7277	25.4066	25.6577	26.6058	26.5619	26.3555	0.0169334	0.0415417	1.55729	CDK4
22.6626	22.8234	22.9462	22.9326	23.0823	23.1184	23.1748	0.0170065	0.0416231	0.283972	PMF1;PMF1-BGLAP
26.5454	26.2687	27.2527	26.9999	27.6907	27.9167	27.5844	0.0170383	0.0417413	0.963902	PSMD8
25.3159	25.2964	24.7509	24.7996	25.7108	25.6507	25.6815	0.0170795	0.0418224	0.640272	NCS1
29.166	29.57	28.6698	28.0411	26.795	24.2084	26.8596	0.0170909	0.0417742	-2.90739	SSR1
25.1642	25.3349	25.3975	25.7247	25.8152	26.3386	26.6421	0.0171401	0.041878	0.859937	POLR2L
27.8381	27.9489	27.7011	27.1226	26.0591	26.7003	26.9437	0.0172614	0.0422529	-1.085	RAB9A
28.5899	28.2087	28.5428	28.5759	28.7754	28.9811	28.935	0.0172789	0.0422687	0.417865	EDF1
30.0086	29.9262	29.3618	30.1615	29.3255	28.561	28.7359	0.0172895	0.0422477	-0.990377	SSBP1
22.4933	21.7996	22.9211	22.977	20.8619	21.3443	21.5827	0.0173165	0.0421993	-1.28475	TUBAL3
22.7899	22.9269	22.4497	23.3232	23.4828	23.7548	23.7629	0.0173498	0.042151	0.794432	PITPNA
30.9247	30.8637	31.0414	31.0394	31.1777	31.1235	31.1641	0.0174738	0.0425234	0.187785	PTBP1
25.5474	25.5843	26.4302	25.7506	25.1265	24.8682	24.7982	0.017475	0.0424749	-0.897173	HMG20A
27.7091	27.64	27.45	27.9456	27.1045	27.1742	27.3545	0.017515	0.0424629	-0.475121	HCCS
26.5495	26.438	26.0438	25.7228	24.9609	25.5851	25.1908	0.0176748	0.042574	-0.94296	BCKDHA
24.4127	24.8525	24.4457	25.1011	23.5352	22.877	21.1449	0.0177003	0.0425529	-2.18397	LAMA5
32.342	32.4007	32.2743	32.4416	31.6374	32.1341	31.9704	0.0177286	0.0426273	-0.450688	VDAC1
23.2451	23.0426	23.9689	22.4771	24.1946	25.2049	24.7253	0.0177503	0.0427015	1.52483	IFT27
24.1614	24.098	23.886	24.2809	24.4249	24.703	24.4629	0.0178113	0.042898	0.423693	DDX49
29.0055	28.739	28.3303	29.1892	29.5486	29.6603	29.5569	0.0178381	0.04294	0.772574	STRAP
24.0585	23.832	24.4666	24.117	24.9638	25.3029	26.5261	0.0178533	0.0429502	1.47907	NUBP1
27.851	27.3427	27.1161	27.272	28.0192	28.3166	28.0015	0.0178847	0.0429785	0.716983	EIF3G
29.2362	29.512	30.2407	29.8856	30.4156	30.8343	30.957	0.0178857	0.04293	1.017	ANXA5
29.5131	29.8959	30.15	29.4744	30.4476	30.4398	30.3832	0.0179164	0.0429808	0.665131	SAFB
24.5433	25.1475	24.5312	24.8006	24.2976	23.3324	23.4161	0.0179454	0.042982	-1.07364	QSOX2
24.8001	24.7116	23.661	24.6178	25.441	25.6979	25.5268	0.0179458	0.0429876	1.10762	BAIAP2L1
25.2137	24.841	24.1806	23.8643	22.589	23.4467	23.1735	0.0179788	0.0430337	-1.45516	CDK5RAP1
22.8763	22.4741	22.5721	22.0224	21.6789	21.8895	21.4239	0.0180154	0.0431291	-0.822146	MGME1
22.4745	22.7999	22.7961	22.137	23.3538	23.2022	23.1247	0.0180634	0.0432332	0.675034	SCYL2
26.2503	26.8019	27.0256	26.813	26.0568	25.9199	26.1025	0.0180694	0.0431848	-0.696311	NUCB1
21.7425	21.8092	21.0141	19.1537	23.6464	23.4904	23.2992	0.0180748	0.0431767	2.54881	HSPB8
27.5464	27.4198	27.4583	27.7214	27.8004	28.2878	27.9998	0.0180815	0.0431285	0.492817	MAPK1
25.3165	25.1274	25.9578	25.7545	26.3822	26.2435	26.3756	0.0180962	0.0430804	0.794764	CUL3
25.2332	25.7468	25.3597	25.5035	24.2537	25.0137	24.7548	0.0181234	0.0431438	-0.786705	SYPL1
25.0704	24.6157	25.0015	25.1971	26.3186	25.7935	25.458	0.018221	0.0433318	0.885569	RAVER1
23.2272	22.617	23.2283	23.6214	24.4158	23.7962	24.5611	0.0182241	0.0432836	1.08423	CCDC43
24.8519	25.1651	24.9453	25.0199	24.6909	24.6739	24.3376	0.0182318	0.0432356	-0.428083	BCL2L13
24.7902	23.8048	24.7083	25.693	23.3969	22.8336	23.0865	0.018242	0.0432231	-1.64339	EIF2B3
19.8179	18.2423	19.3847	21.5648	17.0831	16.3052	17.124	0.0183001	0.0433437	-2.91499	C8orf82
25.6631	26.0809	25.6565	24.6984	23.8799	24.3879	24.4206	0.0183614	0.0434862	-1.29525	B4GALT1
26.7828	26.8081	25.9743	25.2281	24.7301	24.6406	24.6103	0.0184262	0.0435752	-1.53795	TMEM205
23.2354	22.9291	22.1589	22.8035	21.5265	21.1539	22.0697	0.0184337	0.0435271	-1.19834	WBSCR16
23.6468	23.659	23.825	22.4454	22.2638	19.7009	20.6937	0.0184648	0.0435099	-2.50792	NUDT19
21.6683	21.8768	22.867	21.7215	20.6469	19.3174	20.8084	0.0185046	0.043462	-1.77582	P4HA3
24.735	25.0188	25.4341	25.3772	25.8791	26.1584	25.6951	0.0185475	0.0434802	0.76956	CLIP1
22.1197	21.7572	21.3416	21.2128	20.8598	20.7043	20.7054	0.018591	0.0435996	-0.851318	GATB;PET112
32.3403	32.4709	32.3634	32.4646	32.2891	32.0406	32.1568	0.0185955	0.0435516	-0.247676	CLTC
28.766	28.8115	29.2778	29.1368	29.5344	29.4615	29.5287	0.0186051	0.0435477	0.510211	GARS
25.4271	25.4764	25.9148	26.0471	26.5115	26.2699	26.3559	0.01864	0.0435833	0.662725	NUDCD1
28.118	28.0607	28.6539	28.5306	28.9654	29	28.8811	0.0186692	0.0436495	0.608032	PDCD6IP
27.4556	27.6276	27.1641	26.798	25.3772	24.3346	26.4285	0.0187678	0.0438775	-1.88121	ECI1;DCI
24.8793	23.571	23.9877	23.8681	21.9672	20.1947	22.742	0.0187726	0.0438995	-2.44192	ACADS
22.6791	23.4078	22.3126	22.4229	20.0286	21.6425	18.8255	0.0188099	0.0438515	-2.54003	SPG7
24.8128	24.8581	25.619	25.2686	25.6961	26.4917	26.3518	0.0188484	0.0438299	1.0403	DUSP3
22.4185	22.3799	22.7846	23.2108	21.827	21.8582	22.0106	0.0188584	0.0438519	-0.799844	CHID1
28.4421	28.4069	29.2369	28.9737	29.4942	29.7746	29.5977	0.018867	0.0438041	0.857259	MAPRE1
29.3491	29.3065	28.0369	27.7959	26.8545	26.9718	25.356	0.0189105	0.0439261	-2.22798	LETM1
27.1555	25.9619	26.9243	27.2389	24.4363	25.9581	24.6544	0.018911	0.0438784	-1.8039	RAP1A
23.3342	23.9957	23.5965	22.754	24.4958	24.4263	24.5023	0.018915	0.0438308	1.05474	AFF4
29.6987	29.6722	29.2336	28.8985	28.5875	28.5454	28.6575	0.0189879	0.0440087	-0.778957	POR
22.9966	23.1694	23.3431	23.9048	24.0703	24.3837	24.1289	0.0190256	0.0439957	0.840808	FAM96B
27.6857	27.7253	27.5422	27.4608	27.0309	27.167	27.4086	0.0190985	0.0442249	-0.401354	USP39
21.7013	21.6265	21.5483	23.108	23.5344	23.7324	23.3266	0.0191535	0.0443888	1.53518	EML4
28.0615	27.8059	28.3223	27.909	27.0471	27.4547	27.6067	0.0192823	0.0447422	-0.655209	PTGES2
32.6656	32.6076	32.4801	32.4907	32.8794	32.6905	32.892	0.0193208	0.0447672	0.259589	RPS3
23.3418	23.442	23.9256	23.3336	23.9949	24.4147	24.1205	0.0193351	0.0447922	0.665968	MPDZ
20.4307	22.0664	22.0433	21.2949	23.296	22.9201	22.9332	0.0194226	0.0448215	1.59095	TFAP2D;TFAP2A;TFAP2E;TFAP2C;TFAP2B
30.4452	30.6318	31.1169	30.9462	31.2735	31.7064	31.4856	0.0194261	0.0447734	0.703488	EEF1D
26.0167	26.0499	26.6446	26.6163	26.9877	26.9742	27.3061	0.0194688	0.0449528	0.757476	SEPT7
24.0272	23.9995	23.3664	22.3043	21.5112	21.9581	21.824	0.0195	0.0449561	-1.65993	OCIAD2
24.6218	24.9439	25.3508	25.2267	25.7236	25.7912	25.5996	0.0195251	0.044985	0.668966	FAF1
28.1132	28.4434	28.2333	28.3779	28.5322	28.6702	28.628	0.0195522	0.0450481	0.318191	DDX19A;DDX19B
21.7086	21.5275	21.2461	21.5902	20.2931	21.1868	20.3415	0.0195665	0.045	-0.910958	GRIPAP1
22.474	23.7432	23.2116	23.1929	21.9906	22.1011	20.9416	0.0195671	0.044952	-1.47771	PPAP2C
27.5511	27.4737	27.2601	27.0687	26.3057	26.9363	26.7274	0.0196627	0.0451045	-0.681922	TOR1AIP1
25.8189	26.3528	26.3021	25.9434	26.5209	27.0359	26.7753	0.0197758	0.0453674	0.67306	DNAJC8
24.2041	24.4318	24.5874	24.1421	25.2282	24.7403	24.8261	0.0199049	0.0456511	0.590186	TSG101
27.4754	27.2237	27.0661	27.1593	26.6729	26.7178	26.98	0.0199933	0.0457896	-0.440901	SCRIB
25.6385	25.9608	26.621	25.7884	26.9005	27.0655	26.7421	0.020062	0.0459321	0.900539	PSPH
27.8447	27.9653	27.1667	27.3358	26.8873	26.8075	26.3832	0.0201389	0.0460573	-0.885482	NCLN
27.2235	26.7787	25.6264	25.4096	24.2292	24.843	24.148	0.0201701	0.0460508	-1.85284	ALDH1L2
29.0848	29.1576	29.616	29.6533	30.0565	29.9844	29.907	0.0201862	0.0460275	0.60468	MAP4
25.5115	25.9399	26.4772	26.5514	26.8158	27.8116	27.6024	0.0202411	0.0462241	1.2899	DYNC1LI1
28.7189	28.654	27.2355	26.8724	26.2244	25.9618	25.4118	0.0204376	0.0467835	-2.00421	CYC1
28.243	28.8243	28.8856	28.9087	29.4272	29.5377	29.2186	0.0204993	0.0468017	0.679139	MCM2
26.1386	26.2688	26.1906	26.1332	26.5289	26.4288	26.931	0.0205102	0.0467524	0.446752	FIP1L1
22.2584	22.4659	22.1076	21.5765	23.001	22.6866	23.1162	0.020517	0.0467032	0.832455	ANKRD28
25.2898	25.0482	24.7609	25.3997	26.2557	26.3896	25.5295	0.0205309	0.0467298	0.933628	PCNP
28.1097	28.1304	27.7841	26.847	26.4043	26.7445	26.1837	0.0205453	0.0466807	-1.27367	LPCAT1
32.0429	32.0152	32.0736	31.9436	31.9321	31.886	31.8377	0.0205514	0.0466905	-0.133541	DHX9
24.6003	24.5503	24.5011	24.5911	23.521	19.5415	19.6659	0.0205545	0.0466415	-3.65124	HLA-G
26.8424	26.6732	27.3041	27.1373	27.5467	27.5109	27.6137	0.0205815	0.0467728	0.567861	TTLL12
26.3109	26.5422	25.6757	25.6905	24.816	25.3746	25.0353	0.0205963	0.0467238	-0.979542	DCXR
26.2309	26.2041	24.8928	25.2238	22.4197	24.4055	23.7448	0.0206456	0.0467837	-2.11458	MRPL16
33.7157	33.6759	32.4838	32.2509	31.5035	31.6782	31.1904	0.0207625	0.0469729	-1.57421	SLC25A5
26.9832	26.9202	27.1804	26.9979	27.2527	27.7287	27.4197	0.0207784	0.0469239	0.446607	IDE
25.763	25.5098	26.3314	26.2168	26.8982	26.7703	26.5899	0.0209023	0.0472333	0.797524	UGDH
31.1406	31.3385	30.5376	30.4378	29.2642	30.2484	29.4414	0.0209238	0.04723	-1.21227	SLC25A6
26.9222	26.8924	26.6606	25.1812	24.5455	25.0673	24.5079	0.0209523	0.0472058	-1.70721	LARS2
23.599	23.4654	23.1807	23.1792	23.0376	22.4307	22.6756	0.0209527	0.0471568	-0.641438	YIPF6
27.2246	27.2787	27.7358	27.66	28.0501	28.0434	27.9117	0.0209555	0.0471079	0.526965	COPS2
26.752	26.3873	26.3497	27.3915	27.5176	27.8407	27.7575	0.0210766	0.0472456	0.985159	PSME3
26.5721	26.6826	26.8508	26.577	26.8523	27.092	27.1658	0.0212147	0.0474948	0.366106	TFCP2
29.2381	29.1612	29.342	29.5128	29.5755	29.6701	29.6164	0.0212951	0.0476525	0.30714	GNL3
28.3025	28.287	28.5386	29.1791	29.2845	29.5095	29.4489	0.0213727	0.0480207	0.837485	PSMC5
25.6189	25.4855	25.5717	26.0714	26.2028	26.2913	26.1446	0.0213744	0.0479711	0.525992	ACOT7
27.6247	28.0187	28.1042	28.652	28.9337	29.1961	28.8189	0.0213763	0.0479216	0.882982	S100A13
23.6269	24.5719	24.7283	24.0917	23.203	23.2099	23.3903	0.0215522	0.0483913	-0.986937	YY1
33.0229	32.7797	33.2265	33.2177	33.4349	33.4566	33.5623	0.0217674	0.0486296	0.422899	NCL
20.9469	21.0843	21.0452	20.7521	21.2918	22.5106	22.4363	0.021792	0.048629	1.12245	TTC19
21.3841	21.025	21.4845	22.0948	22.3341	22.8303	22.2883	0.021826	0.0487228	0.987124	C12orf57
25.7146	26.1972	26.1809	26.1445	20.8766	24.7505	19.4716	0.0218637	0.0488656	-4.35978	CEBPB
27.4074	26.9447	27.7009	27.0476	27.9558	27.8673	28.0868	0.0218984	0.0488975	0.694821	UBAP2L
23.0498	22.3996	22.3008	21.7163	21.2316	20.3787	18.7873	0.0219207	0.0490072	-2.23409	STIM1
28.81	28.6927	28.4976	28.3621	27.9544	28.1211	28.2886	0.0219218	0.0489571	-0.469202	ABCD3
24.5821	25.1796	25.1348	24.7068	25.7346	25.6006	25.3475	0.0221714	0.0494464	0.660076	LRRFIP1
30.2464	30.3515	29.1826	28.9915	28.375	28.4347	28.0721	0.0221737	0.0493959	-1.39908	HADHA
25.1589	25.5959	25.4425	24.9032	24.3682	24.8601	24.3397	0.0222023	0.04937	-0.752463	UQCR10
30.0496	29.9917	29.0245	28.7319	27.8841	28.4039	27.9447	0.0222729	0.0495234	-1.37185	LONP1
21.2401	21.6838	21.5172	21.242	21.7334	22.5025	22.297	0.0222845	0.0496358	0.756893	PPP1R8
22.934	23.312	23.7413	23.8885	24.2764	25.218	24.3988	0.0222963	0.0496098	1.16213	IRGQ
25.3683	24.5165	25.2777	25.5975	26.0402	26.5841	26.0415	0.0223064	0.0495594	1.03193	UBXN1
21.2779	21.7261	22.2491	21.4693	20.9102	20.5297	20.9385	0.0224829	0.0497444	-0.88779	PI4KA
26.3757	26.1313	26.8317	26.6524	25.8979	25.7893	25.9734	0.0225496	0.0498845	-0.6109	AATF
23.1559	22.2313	23.0721	23.1948	23.6709	23.8089	24.15	0.0225566	0.049834	0.963035	TTI1
27.5375	27.6605	26.8576	26.3034	25.8032	25.893	25.9117	0.0225751	0.0497836	-1.22047	TMEM214
28.3661	28.3451	28.5778	28.9164	29.4004	29.0584	29.0186	0.0225776	0.0497333	0.607758	RANBP1
24.4918	25.0862	24.7795	24.8839	25.354	25.1867	25.4804	0.0225889	0.0497316	0.530019	GBF1
21.5384	22.3082	23.1434	21.6734	20.379	19.3465	20.9982	0.0226798	0.0498508	-1.92461	ARHGAP5
27.3947	26.9432	27.8339	27.5254	26.325	26.751	26.7619	0.0226842	0.0498006	-0.811711	DAZAP1
22.3018	22.5162	23.0222	22.9245	23.183	23.5155	23.5652	0.022709	0.0498793	0.730056	WDR26
22.0588	22.0938	22.2073	22.4614	23.05	22.781	22.4833	0.0227152	0.0498291	0.566143	FAM83D
23.4015	24.3162	23.4456	22.9918	22.3327	22.5974	22.4141	0.022806	0.0500643	-1.09068	C14orf1
29.1491	29.0907	29.3015	28.8414	28.5762	28.8349	28.5309	0.0228391	0.0501224	-0.448363	DDOST
27.3147	27.3937	27.3525	27.2912	27.4006	27.5555	27.573	0.0229554	0.0504369	0.171648	NKRF
25.232	25.8935	24.178	23.9506	23.1359	23.1026	22.9424	0.0229757	0.0504985	-1.75322	FECH
27.6883	27.6781	27.6628	27.4061	27.8275	28.4618	28.2345	0.0229924	0.05052	0.565787	RRP1
22.4633	22.5383	21.6409	20.9506	20.8056	19.5488	20.1145	0.023085	0.0508052	-1.74192	MOSPD1
31.7038	31.5556	31.914	31.9466	32.2218	32.1334	32.0889	0.0231062	0.0507665	0.368045	HSPA1B;HSPA1A
23.2027	22.0161	22.5547	22.8444	23.6331	23.7275	23.5163	0.0232931	0.0512662	0.971148	CDK13;CDK12
25.4941	23.8205	24.6062	24.4677	21.0792	21.8868	23.6095	0.0233143	0.0512829	-2.40523	MRPL2
26.0578	25.7898	25.4288	26.1135	26.6862	26.3504	26.4636	0.0234538	0.0514587	0.652582	PRMT3
26.2925	26.1167	25.3866	25.5812	24.5155	24.9166	25.1862	0.023539	0.0517018	-0.971495	BNIP1
28.1768	28.594	28.7454	28.8917	29.0374	29.3463	29.5255	0.0235531	0.0517418	0.701088	PSMB6
23.4891	23.0713	22.6654	22.4072	22.0168	21.8907	22.0762	0.0235809	0.0517698	-0.913665	LNP
31.9476	31.9759	31.6609	31.683	31.5187	31.5199	31.3384	0.0236959	0.0521031	-0.357871	ATP1A1
25.3457	25.4384	25.5482	25.9442	26.027	26.7676	26.2374	0.0237283	0.0521188	0.774847	QKI
24.1426	24.5331	24.6436	24.1371	25.6116	25.0855	24.8099	0.023736	0.0521068	0.804921	RABGGTB
27.2521	26.6779	27.6678	27.3339	28.0999	28.0847	27.9086	0.0237699	0.0521462	0.798122	POLR1C
24.4701	24.0468	22.2821	22.8844	19.4254	20.6353	21.9596	0.0238081	0.0522764	-2.7474	OSTC
29.7279	29.8101	29.8972	30.3818	30.3731	30.648	30.6887	0.023953	0.0525562	0.615645	IPO5
24.6227	24.5907	24.1323	24.5476	24.7937	25.7404	25.7594	0.0239809	0.052599	0.957825	AMPD2
30.4393	30.6507	28.9478	28.6782	27.6063	28.0378	27.5129	0.0239915	0.0525472	-1.95997	NNT
28.0322	28.1715	28.0517	28.089	28.2081	28.6	28.6957	0.0241801	0.0529125	0.415171	RBM8A
30.4211	30.0324	29.2933	29.1158	28.4745	28.7632	28.0839	0.0242328	0.052998	-1.27513	ATP5C1
28.0505	28.0554	28.7489	27.8991	28.8297	29.041	28.9056	0.024271	0.0530167	0.736942	ARPC2
22.2632	22.038	21.1046	22.3689	22.8078	23.1555	23.4772	0.0242883	0.0530196	1.20314	FBXO2
25.519	25.3379	24.6577	24.9082	24.0516	24.5616	24.1511	0.024317	0.0530382	-0.850945	RHOT1
28.7506	28.5037	28.3416	28.7472	29.1148	28.9066	28.9685	0.0243467	0.0530333	0.410862	EIF3E
28.4155	28.1557	26.9983	27.1701	26.2131	26.5959	26.0605	0.0243905	0.0530479	-1.39503	NDUFA9
26.9568	27.6499	27.3502	26.7905	25.9213	26.4206	26.5486	0.0245015	0.0533633	-0.89003	FKBP8
27.9923	28.057	28.7219	28.6131	29.0916	29.0533	29.0157	0.0245348	0.0535141	0.707427	NUDC
26.9123	26.6154	26.5916	26.987	26.4973	26.2209	26.2922	0.0245703	0.0535828	-0.439739	SEH1L
25.3328	25.9612	25.8702	26.1794	26.9547	26.3613	26.6378	0.0245983	0.0535307	0.815406	NOL6
27.1201	27.3331	27.1653	26.8643	26.6382	26.807	26.7542	0.0246757	0.0536342	-0.387558	CCDC47
29.8042	29.7425	29.5624	29.7227	29.8581	29.9307	29.9973	0.0247789	0.053757	0.22075	DDX23
22.9068	23.0288	23.5321	23.4187	23.8404	23.9264	23.6825	0.0248581	0.0537903	0.594854	TPM1
25.6259	24.9589	25.7422	25.4679	25.9057	26.5405	26.3508	0.0248815	0.0537381	0.816978	POLR2G
26.6846	26.8317	27.3133	27.3438	27.6957	27.6134	27.7216	0.0248919	0.053686	0.633569	COPS4
32.8003	33.2268	33.7947	33.1216	33.9291	34.1686	34.0056	0.0249019	0.0536767	0.798605	CFL1
23.9057	23.6215	23.1874	23.186	23.9697	24.2882	24.3938	0.0249081	0.0536248	0.74207	DNAJC21
27.0113	27.108	27.4706	26.9573	27.5057	27.7189	27.5761	0.0249701	0.0538203	0.463487	DDX56
25.1948	24.965	25.2419	25.5374	25.5403	25.8656	25.9209	0.0250019	0.0537876	0.540846	PGP
25.4588	25.3433	25.9646	25.656	25.1502	24.9868	25.1065	0.0250772	0.0539209	-0.524522	HERC2
25.8371	25.8708	26.566	25.8551	25.5642	24.1932	24.4599	0.025148	0.0540501	-1.29314	CNPY2
23.8133	23.2614	22.7953	23.4414	24.0509	24.1254	24.2011	0.0252044	0.0541752	0.797973	CMTR1
24.7181	24.4993	22.9452	24.8428	22.236	22.688	22.7333	0.0252547	0.0542423	-1.6989	MARC2
24.2568	24.4503	25.3667	24.7781	25.3673	25.9051	26.1931	0.0252913	0.0542709	1.10884	PSMB9
22.1749	21.8332	21.4926	22.1659	22.3416	22.7879	22.7717	0.0253323	0.0543724	0.717082	C1orf131
28.3316	28.3999	28.2364	28.2426	28.4195	28.5015	28.4616	0.0254057	0.0545388	0.158233	NUP107
27.7553	27.8579	28.386	28.3289	28.5239	28.9041	28.8406	0.0254622	0.0546207	0.674167	ATIC
29.1699	29.2727	29.7643	29.1739	28.9301	28.7193	28.7009	0.0255084	0.0548096	-0.561761	DEK
24.7204	25.0941	24.1785	24.0968	23.5522	19.71	21.0329	0.0255585	0.0547954	-3.09076	ELOVL1
25.5908	25.2927	26.2941	26.2639	26.8102	26.7832	26.7704	0.0255884	0.0547775	0.927572	CSRP1
27.9197	28.1095	28.8807	28.2783	29.3538	29.2291	28.8813	0.0255938	0.0547252	0.857657	NAP1L4
23.2872	22.39	23.0415	23.5066	21.6694	22.2908	22.1387	0.0256444	0.0547684	-1.02337	RQCD1
28.8984	28.798	28.8171	29.0748	28.5517	28.7252	28.6018	0.0256489	0.0547162	-0.270836	HNRNPUL2;HNRNPUL2-BSCL2
24.1791	23.7834	24.0336	24.0726	20.5339	20.2814	23.3741	0.0257568	0.0549876	-2.62068	STX6
22.8902	22.6848	22.5568	22.6778	24.2758	23.8478	23.0098	0.0257825	0.054981	1.0087	LRRFIP2
26.7667	26.757	27.2376	26.6536	27.4635	27.3132	27.2954	0.0258499	0.0550237	0.503637	HUWE1
22.4172	22.1158	22.837	23.0734	21.5683	21.8537	21.8992	0.0258741	0.0551461	-0.837087	SELO
30.1902	30.2482	29.2018	29.8311	28.687	29.1809	28.8224	0.0258991	0.0552114	-0.971064	PDHB
30.933	30.9671	29.448	29.186	28.1764	28.6468	28.156	0.0259404	0.0552159	-1.80711	SLC25A3
29.2539	29.3094	28.297	27.9884	26.7528	27.8862	26.6305	0.0260054	0.0553377	-1.62236	SLC25A13
29.7505	29.7107	30.5445	30.3564	30.8186	30.8271	31.039	0.0260952	0.0554972	0.804411	PRDX2
22.8002	22.4116	25.1285	24.7201	21.5733	21.2682	20.5679	0.0261082	0.0554448	-2.62863	ORC5
24.6815	24.8256	25.7387	24.7642	23.9457	23.9283	24.2627	0.026113	0.0553925	-0.956946	TOR1A
24.3549	24.8876	24.3967	25.1411	24.1077	23.7561	23.9515	0.0261322	0.0554156	-0.756603	TIA1
23.5732	23.1745	22.9444	23.1728	22.7408	21.9252	22.5613	0.0261534	0.0554614	-0.807089	SORT1
20.3409	20.0227	20.5662	20.9553	21.389	20.9991	21.5417	0.0261613	0.0554468	0.838625	NDE1;NDEL1
22.4249	22.2583	23.1424	22.7006	23.2119	23.6879	23.396	0.0261677	0.0553947	0.800349	NOL3
30.5921	30.6519	30.9847	31.3496	31.4785	31.5728	31.585	0.0261742	0.0553427	0.650826	CCT2
36.2464	36.1071	36.4215	36.3421	36.4885	36.5444	36.6893	0.026182	0.0552908	0.294782	ACTG1
25.9658	25.963	25.4441	26.1839	26.3795	27.3166	26.7309	0.0262216	0.0554827	0.919859	BLM
24.9839	24.8268	25.3542	25.7427	26.3688	25.8031	26.11	0.0262382	0.0554906	0.86707	RTF1
25.3863	25.4646	25.601	25.3821	26.0052	26.4147	25.6897	0.0264766	0.0559476	0.578036	DNPEP
25.4129	25.0046	25.3012	25.1787	25.6325	25.4646	25.6372	0.0266582	0.0563813	0.353723	ATP6V1E1
22.5535	22.6779	22.4396	23.3889	23.544	24.0916	23.4665	0.0267733	0.0566947	0.935742	FNTA
25.5607	25.2074	25.2626	25.0466	24.9722	24.717	24.8014	0.0269182	0.0568172	-0.439143	WDR11
33.2925	33.3793	33.2341	33.2004	33.402	33.5005	33.4185	0.0269781	0.0567978	0.163738	HNRNPU
25.2949	25.0062	25.0978	24.7488	25.3855	25.4946	25.5144	0.0270145	0.0568007	0.427858	EIF2B4
27.3975	27.0959	27.4789	27.0849	27.0049	26.427	26.6376	0.0270215	0.0567963	-0.574479	DHODH
21.647	21.7875	22.041	21.4195	21.2109	21.2418	21.2812	0.0270619	0.0568773	-0.47913	GOSR1
19.6685	19.8399	21.2494	22.7482	23.0637	23.9145	23.7928	0.027073	0.0568802	2.71385	PPP1R7
28.3861	28.6597	28.7019	28.6442	29.046	29.0114	28.7709	0.0270732	0.0568275	0.344796	MCM5
27.8628	28.1175	28.8535	28.3295	28.9947	29.2215	29.0292	0.0271148	0.0569305	0.790994	AKR1B1
31.1045	31.0362	30.6031	30.1794	29.9845	29.8706	29.9658	0.027146	0.056937	-0.790472	RPN1
26.8624	26.3315	26.3579	26.191	25.9385	25.8934	25.4307	0.0271542	0.0568844	-0.681512	HP1BP3
25.1033	25.435	24.6629	24.2491	23.4649	23.9799	24.002	0.0272787	0.0569242	-1.04698	MRPS24
29.6248	29.7031	28.6177	28.5059	27.7788	28.2002	27.6016	0.0273115	0.0568717	-1.25268	HADHB
27.817	27.6482	27.4092	28.2128	28.2343	28.5086	28.7019	0.0273119	0.0568192	0.709827	WDR12
26.2071	26.4648	26.1943	27.2177	27.1278	27.7408	27.8432	0.0273602	0.0569106	1.0496	C12orf10
27.5404	27.9988	26.7589	27.2244	26.7196	26.0702	25.7868	0.0274687	0.0570681	-1.18844	TOMM5
30.5513	30.6557	29.8546	31.2259	31.4906	31.7596	31.5978	0.0275278	0.0570561	1.04413	SUB1
26.77	26.7201	25.9884	25.7014	25.1526	25.5564	24.978	0.0275674	0.0571544	-1.06599	MRPL15
25.3644	25.4019	25.2216	25.8916	25.9021	26.0453	26.1462	0.0275815	0.0571387	0.561303	HEXA
23.3889	23.7346	23.7963	23.9609	23.3431	23.0707	22.5805	0.0276033	0.0571193	-0.722054	CLK3
26.3292	26.3315	26.1426	26.5912	26.8831	26.6298	27.2519	0.0276415	0.0571036	0.572971	PPID
24.647	24.3281	24.3454	24.668	24.7589	24.9011	25.1031	0.0276772	0.0570879	0.423905	AURKB
29.5431	29.5564	29.8187	30.0639	30.4473	30.0557	30.3665	0.0277034	0.0570686	0.544308	IMPDH2
27.0424	26.7423	27.128	27.3834	27.79	27.3949	27.8665	0.0277337	0.0570457	0.60978	PPP1CC
21.9181	21.8391	21.359	22.5052	22.5859	23.2197	22.8362	0.027878	0.0573589	0.975257	UBE2A
30.2451	29.9948	30.2909	30.3105	30.3895	30.7667	30.6423	0.0279122	0.0573504	0.389161	MIF
28.0965	28.3357	28.339	28.1911	27.4703	27.957	27.9248	0.0279373	0.0573747	-0.456531	NDUFA8
26.7964	26.8889	27.6521	27.1346	27.6407	28.2545	27.9511	0.0279508	0.0573479	0.830779	KATNAL2
29.0429	29.1111	29.2754	29.4105	29.6156	29.8704	29.448	0.0280108	0.0573248	0.434715	EIF6
24.9406	24.2055	24.5237	23.5614	22.6059	23.4745	23.1343	0.0280554	0.0573891	-1.23625	FARS2
29.8941	30.0419	30.3175	30.5012	30.7062	30.5927	30.881	0.0280817	0.0574823	0.537949	HSPA4
28.8598	29.3264	28.719	27.6094	27.2337	27.3574	27.3378	0.0282145	0.0577677	-1.31898	TECR
20.7963	21.2178	20.4158	21.8096	21.8687	22.4753	22.3846	0.0282693	0.0578241	1.18296	SAMD4B
23.2557	23.3898	24.6145	24.3355	25.3308	24.9705	25.152	0.028276	0.0577717	1.25224	LIG1
32.6608	32.6112	32.7667	32.4805	32.4606	32.3578	32.3857	0.0283446	0.0578136	-0.228452	PRKDC
24.2233	23.9583	23.8167	23.5819	23.0243	22.4282	20.7004	0.0283672	0.057783	-1.84407	EMC3
24.1442	24.2376	23.6116	23.8027	23.0828	23.3953	23.5086	0.0283673	0.0577308	-0.62012	MTFR1
26.6505	26.4722	26.8344	26.824	27.158	27.1919	26.9	0.0283897	0.0576787	0.38804	CTNNBL1
22.3322	21.9703	21.0146	21.9008	20.6761	20.562	20.9908	0.0284027	0.0576664	-1.06152	TMEM41A
26.5255	26.4778	25.3397	24.8512	24.1637	24.5547	23.1896	0.0284774	0.0577514	-1.82924	OXA1L
25.7721	26.0273	26.4908	26.7071	27.6356	26.8734	27.115	0.0285174	0.0577246	0.958658	PFDN5
23.5105	23.7382	22.8141	23.66	22.4358	22.4384	20.9124	0.0285447	0.0577194	-1.50188	ENDOG
25.8334	25.9637	26.2838	26.2558	25.5368	24.5673	25.4736	0.0286085	0.0578688	-0.8916	LAMTOR1
24.8732	24.2288	24.1736	23.5054	22.7421	23.3196	23.2149	0.0286637	0.0578995	-1.10301	VMP1
29.2825	29.1526	29.2022	29.1961	29.3642	29.3976	29.6785	0.0286824	0.057887	0.27176	DDX1
25.3959	25.0606	25.3639	25.7967	24.9408	24.5705	24.8593	0.0287194	0.0578889	-0.614099	CD97
22.905	22.7777	23.5175	22.9485	23.4591	23.8042	24.062	0.0288788	0.0583205	0.737945	MID1
27.1596	27.7949	27.8339	27.2144	28.0974	28.1185	28.3102	0.0289014	0.0583327	0.674648	MESDC2
29.8468	29.6585	30.1995	30.2006	30.5378	30.3457	30.7625	0.028936	0.0583199	0.572312	NACA
25.5218	25.4733	24.5388	24.0438	23.7918	23.3762	22.2165	0.029067	0.0586321	-1.76625	MRM1
22.4652	22.2856	21.7593	22.0782	22.9064	22.7041	22.598	0.0291777	0.0587261	0.589109	KMT2D
27.558	27.5369	27.2038	26.4489	26.3594	25.9529	26.3037	0.0292434	0.0586952	-0.981555	HMOX2
25.1817	25.1151	25.4029	24.8223	24.4576	24.8506	24.3202	0.0292646	0.0587106	-0.587664	EMC7
21.087	20.7809	21.4458	21.0789	21.5298	21.5824	21.6799	0.0292753	0.0586584	0.499216	GATSL2
27.6976	27.3185	27.5291	27.6091	27.9686	28.4305	27.836	0.0293677	0.0589653	0.539792	RECQL
25.8596	25.6944	25.8692	25.8085	26.74	26.1086	26.1643	0.0294121	0.0590835	0.529698	ZC3H15
30.2464	30.1398	29.6642	30.4137	29.1432	29.707	28.7057	0.0294231	0.0590311	-0.930715	ARF1;ARF3
26.9464	27.3356	27.7938	27.9624	28.2066	28.3837	28.4643	0.0295485	0.059305	0.842002	SNX3
23.8849	23.7232	23.5156	23.2595	22.727	23.2953	22.7331	0.0295557	0.0592524	-0.677323	GEMIN2
25.3865	25.2655	24.8772	25.1337	25.4656	25.6434	25.6355	0.0296315	0.0593664	0.415784	UBE2V2
21.8636	21.8904	20.8671	22.2158	22.8848	23.3312	22.511	0.0296775	0.0593775	1.19975	NUDCD3
27.6323	27.7048	27.8066	27.7076	27.8442	28.436	28.2198	0.0297095	0.0594346	0.453858	NPEPPS
26.2687	26.0554	26.7038	26.3367	26.984	26.7603	26.8096	0.0297437	0.0594387	0.510117	GRWD1
19.6804	19.8224	20.1265	20.0289	19.4949	19.5864	19.5677	0.0297765	0.0594991	-0.364892	SULT1A4;SULT1A3
26.1008	26.8636	25.8869	25.8467	24.9061	25.4343	25.3664	0.0298659	0.0596476	-0.938855	ITPR3
22.4142	22.9886	23.2188	22.6936	23.5086	23.4203	23.4322	0.0301627	0.0602887	0.624946	RNASEH2C
23.2714	23.4078	23.3991	23.5925	23.844	24.7441	23.9316	0.0302388	0.0604398	0.755521	SAMD1
27.8285	27.7719	27.6774	27.6518	27.4697	27.5968	27.2473	0.0303009	0.0605026	-0.294487	CHD1
29.4958	29.1008	28.8045	29.0211	28.092	28.228	28.7855	0.030374	0.0606953	-0.737043	RPL14
26.5207	26.8059	25.8242	25.9594	25.3252	25.4817	25.5229	0.0304006	0.0607088	-0.834289	NFU1
28.856	29.0868	28.2566	28.0903	27.6674	27.9042	27.407	0.0305651	0.060915	-0.912917	LMAN1
27.6646	27.9378	27.2054	26.5787	25.9997	26.598	25.5186	0.0306126	0.0609317	-1.30784	TST
29.7117	29.6966	29.2337	28.776	28.537	28.7142	28.2532	0.0307756	0.0614558	-0.853034	GLUD1;GLUD2
22.4561	21.6392	19.8375	21.9167	24.3262	23.3727	23.2247	0.0307784	0.0614021	2.17881	CXorf56
21.8767	23.0257	23.4297	22.2608	21.2866	21.4871	21.4085	0.0308266	0.0613485	-1.25415	MBLAC2
26.0552	25.9659	26.312	26.5763	26.6094	27.2736	26.8529	0.0308433	0.0612949	0.684617	PGLS
29.34	29.4013	29.1991	29.9932	30.0397	30.129	30.1499	0.0308709	0.0613008	0.622837	ST13;ST13P5;ST13P4
27.7935	27.4096	27.7299	27.6477	28.1281	27.9052	27.9329	0.0309292	0.0614251	0.343557	HCFC1
28.4633	28.4097	28.9342	29.089	29.1571	29.4661	29.5305	0.0311469	0.0618938	0.660545	PPA1
30.3911	30.4303	29.7778	29.059	28.0862	29.0248	28.6734	0.0311902	0.06192	-1.31977	NUP210
27.0421	26.9594	27.3122	27.6094	27.578	28.1537	27.9558	0.0312295	0.0619288	0.66508	USP5
28.368	28.354	28.7994	28.763	29.1129	28.9091	29.048	0.0312388	0.0618958	0.45221	EIF3C;EIF3CL
28.2333	27.9799	27.1076	27.0679	26.7582	26.4823	26.1076	0.0313246	0.062026	-1.14781	HM13
24.383	23.7032	23.1967	23.2733	22.6857	22.6596	22.7085	0.0313452	0.0619723	-0.95441	MCCC1
21.9166	22.0347	21.8729	22.4066	21.4246	21.5813	21.7319	0.0314338	0.0621229	-0.478416	GNPAT
27.3697	27.0726	27.6355	27.0829	27.7853	27.7219	27.782	0.0314352	0.0620692	0.472861	TRIM25
28.2512	28.2554	28.5678	28.127	28.5269	28.7358	28.8131	0.0314791	0.0620951	0.391548	NSF
21.8493	23.7079	23.7225	23.1662	22.0356	20.1963	21.0204	0.0315394	0.0622522	-2.02741	KIAA0391
29.3944	29.2911	28.7054	28.8798	28.2923	28.5923	28.4781	0.031653	0.0624538	-0.61346	ATP5L
28.1421	28.0606	28.5922	28.6461	28.7981	28.9382	28.9775	0.0316646	0.0624	0.544345	IPO7
26.7129	26.8261	26.7505	26.0683	25.888	26.0249	25.9909	0.0316747	0.0623463	-0.621507	TM9SF3
31.3643	31.1073	30.7732	30.8148	31.3377	31.7942	31.6855	0.0317103	0.0623683	0.590921	RPL22
20.9426	22.4102	22.2324	22.5071	23.4079	23.2572	23.2458	0.0317705	0.0624282	1.28062	METTL13
22.8773	23.5003	23.2483	23.0322	23.481	23.8657	23.8332	0.0318217	0.0625636	0.562119	ASH2L
27.7696	27.3604	27.2439	27.3973	27.8674	27.76	27.9897	0.0318554	0.0625442	0.429558	SART1
26.9432	27.0811	27.2133	27.2332	26.8415	26.8286	26.9358	0.0318822	0.0625523	-0.24907	PLOD1
26.2095	25.7297	25.7352	25.4642	26.3194	26.4832	26.2521	0.0319589	0.0628141	0.566869	POP1
23.627	23.9831	24.171	23.9223	22.2141	22.9799	20.0941	0.0320434	0.0630445	-2.16316	PCCB
21.8875	21.8032	22.1039	21.2781	20.1238	21.3175	20.7255	0.0320576	0.0630419	-1.0459	GPX1
25.8066	25.8518	25.2391	24.8467	24.3178	24.6987	23.288	0.0321134	0.0631111	-1.33456	MCAT
22.6317	22.4467	22.3246	22.5258	22.6634	22.826	23.0812	0.0321993	0.0631289	0.37469	FOXK2
29.5702	29.5796	29.5218	29.3713	29.3708	29.342	29.263	0.0322283	0.0630956	-0.185408	SMARCA5
27.399	27.6789	27.6553	27.6193	27.7475	28.3709	28.1496	0.0322813	0.0633214	0.501242	CYFIP1;CYFIP2
31.5055	31.4987	30.5993	30.3879	29.9057	30.1163	29.8399	0.0322846	0.0632675	-1.0439	CS
32.0729	32.267	32.4848	32.3271	31.9511	31.9873	32.0241	0.0323238	0.0632715	-0.300459	P4HB
29.0188	29.2215	28.2985	28.2854	27.5936	28.0815	27.6807	0.0323333	0.0632381	-0.920804	PMPCB
28.5149	28.9171	29.179	29.2156	29.5029	29.5213	29.5315	0.0323477	0.0632251	0.561895	RAD23B
22.5918	22.9185	22.7058	22.93	22.9542	23.4107	23.3952	0.0324319	0.063236	0.466833	ZCCHC17
22.4512	22.0008	21.4046	21.8681	23.3789	22.5347	22.7841	0.0324583	0.0632366	0.968048	NUSAP1
29.0415	29.5508	29.3725	29.9453	29.9051	30.5713	30.4112	0.0325092	0.0632949	0.818367	HDGF
28.5031	28.3513	28.5901	28.1329	27.7987	28.0264	28.1103	0.0325172	0.0632413	-0.41591	DDX47
22.9723	21.5743	21.764	23.6586	21.4673	19.2473	19.2679	0.0325304	0.0631878	-2.49813	RAPH1
24.271	26.4526	25.123	25.5358	24.425	21.4469	21.1884	0.0326151	0.0632358	-2.99222	ATAD3A
24.8044	26.04	26.4846	24.7545	24.1601	24.1005	23.1282	0.0326431	0.06325	-1.7246	SLC7A2
24.6125	24.5647	25.2461	25.7119	25.8634	26.0587	26.0701	0.0327762	0.0633586	0.963571	DNM1L
28.1182	28.0444	28.1712	28.0213	28.1603	28.454	28.4357	0.0328065	0.063339	0.261204	DAB2
24.9104	25.3723	25.0715	24.6399	23.5552	22.8543	19.6715	0.0328432	0.0633227	-2.97153	LPCAT3
22.9463	23.1798	22.9366	22.6512	22.2037	22.7068	22.1005	0.0328777	0.0633434	-0.591496	MT-ATP8
24.66	24.1693	23.484	23.7595	23.3592	22.8599	22.9506	0.0329503	0.0634146	-0.961617	ACADSB
29.9482	30.0178	29.7497	30.2893	29.6154	29.6699	29.5175	0.0330609	0.0635697	-0.400372	ACTN1
23.5989	24.4796	24.0514	23.3108	25.1036	24.5694	24.7979	0.0330747	0.06356	0.963437	ARHGEF1
30.81	30.8786	31.2066	30.8046	31.1881	31.3001	31.316	0.0332521	0.0640369	0.343155	EIF4A3
24.6077	25.4717	25.2031	25.1651	23.5716	24.6303	24.2049	0.0332705	0.0640034	-0.976264	ANKLE2
24.5856	24.3769	21.6725	23.0822	20.1154	21.5031	21.0887	0.0333411	0.0640603	-2.5269	RAB5B
25.6626	25.569	24.9131	25.7537	24.6899	24.7474	24.9387	0.0333722	0.0640067	-0.682595	COX6B1
32.0402	32.1677	32.4557	32.3778	31.8234	31.9406	31.9764	0.0334014	0.0639833	-0.346931	PHB
24.3142	24.9153	23.6021	22.3686	22.1057	21.6001	21.9368	0.0334107	0.0639298	-1.91918	POLRMT
24.8417	24.8004	25.7965	25.4966	25.9869	26.2466	26.0693	0.0335044	0.0641369	0.86715	ISY1
23.918	23.8603	23.0795	22.3117	20.0767	21.5217	22.2289	0.033553	0.0641435	-2.01666	XPNPEP3
27.3075	27.3608	27.649	27.7736	28.1437	27.9774	27.8058	0.0336429	0.0643567	0.452907	PSMB7
25.108	24.4139	24.7169	23.9318	25.5135	25.4195	25.2949	0.0336573	0.0643164	0.866658	METTL16
23.733	24.2449	24.7308	23.8278	23.3048	23.2325	23.4645	0.0336645	0.0642862	-0.800199	DPP7
23.9381	23.6218	23.1192	23.8457	24.6958	24.0959	24.3715	0.033723	0.0644456	0.756569	POLA1
23.7552	23.8422	24.7493	24.777	25.0408	25.7402	25.2975	0.0337366	0.064392	1.07861	PGM2
21.2676	19.2061	22.7081	20.8532	23.4983	23.7065	23.2754	0.03406	0.0649195	2.48465	PAPSS2
25.1767	25.1487	24.8754	25.7743	26.4172	26.0058	25.7319	0.0340865	0.0648955	0.807907	PMM2
21.9296	21.9436	21.9948	22.3829	22.521	25.6443	25.1033	0.0341279	0.064971	2.36018	MSTO1
22.1972	26.4375	21.1126	22.4293	27.0505	27.2166	26.8631	0.0341493	0.0649834	3.99927	CMAS
28.7212	28.3102	28.6801	28.564	29.6453	29.1471	28.8482	0.034229	0.0652208	0.64465	TCOF1
23.896	23.0902	22.9519	23.0658	21.8767	20.3418	22.4532	0.0342611	0.0652397	-1.6937	RAB20
30.7453	30.6053	29.921	30.4785	29.7433	29.7696	29.9116	0.0343738	0.0653873	-0.629352	RAB7A
31.7416	31.8623	31.9717	31.7284	31.3514	31.7058	31.4638	0.034384	0.0653333	-0.319021	NUP205
26.153	26.3024	26.9913	26.5869	27.0957	27.1229	27.2097	0.0344948	0.0654872	0.634351	KIF4A
27.3663	27.7338	28.1285	27.554	28.316	28.1564	28.3244	0.034512	0.0654695	0.569958	DNAJA2
24.0288	23.5684	24.1929	23.2132	23.2002	22.794	22.7628	0.0345184	0.0654486	-0.83182	PARP2
24.6716	24.3848	24.485	23.3454	23.0983	23.4182	22.9306	0.0345784	0.0654737	-1.07269	RETSAT
22.801	21.9727	22.603	22.3639	23.2362	23.3523	22.8469	0.0346016	0.0654199	0.710022	DCTD
26.3137	26.1309	25.7888	25.5438	25.1442	25.5414	25.1488	0.0347491	0.0655468	-0.666173	NCEH1
19.0234	20.6575	19.8447	21.0531	21.6851	21.4243	22.2393	0.0347677	0.065493	1.6382	RTFDC1
27.0881	26.7675	26.3887	26.3514	26.0152	26.0929	26.0562	0.0348147	0.0655279	-0.594148	ASPH
25.6115	24.8763	25.7456	25.9911	26.6172	26.3218	26.2888	0.0348638	0.0656413	0.853128	ENY2
23.3918	23.498	22.9413	22.3921	21.5573	22.387	22.1095	0.0348903	0.0656137	-1.03785	ZFPL1
24.5388	24.5301	24.3679	23.6893	23.8379	23.3189	23.163	0.0348976	0.0655601	-0.841606	SCO2
21.7419	21.1793	19.8156	21.556	22.4811	23.0346	22.3777	0.0349194	0.0655784	1.55793	SURF2
24.1041	23.0392	23.7395	23.7717	22.4831	22.8023	23.0951	0.0350526	0.0657371	-0.870184	PIGK
23.9644	23.4733	24.0972	23.7524	22.8136	22.7789	23.5648	0.035067	0.0657129	-0.769394	CASK
22.4126	22.7158	23.5092	23.2451	23.7027	23.8276	23.9713	0.0351746	0.0659658	0.863242	NFKB1
27.8416	27.9467	28.58	28.0972	29.1454	28.6517	28.6165	0.0351937	0.0659577	0.688164	GSPT1
25.8315	26.0536	25.7387	25.9844	25.6427	25.6986	25.4292	0.0353535	0.0660765	-0.311885	NGDN
23.5852	23.394	24.529	23.641	22.3727	22.8217	23.1417	0.0353811	0.0660976	-1.00859	STX16-NPEPL1;STX16
21.4231	20.1107	20.6358	19.0372	21.813	22.0641	22.1602	0.0354481	0.0661966	1.71073	DCTN4
27.4304	27.4894	27.941	27.7261	27.889	28.2658	28.3933	0.0355823	0.0663377	0.536016	GSTM3
24.0352	23.9271	24.7839	24.9725	23.2467	23.5318	23.6899	0.0355904	0.0663195	-0.940189	TMOD1
23.5505	23.6168	22.5989	22.5379	22.0639	21.967	20.4888	0.0356862	0.0664538	-1.56948	QPCTL
30.0134	29.9175	30.1225	30.1247	29.8238	29.7005	29.9248	0.0356957	0.0664	-0.228225	AP2B1
28.0642	28.3903	28.7586	28.8427	28.0977	27.5569	27.7494	0.0358207	0.0665631	-0.712581	ERLIN2
28.6891	28.7477	27.729	27.8572	27.1041	27.6305	26.9069	0.0358533	0.0666354	-1.04188	CLPX
23.8093	24.0384	24.0167	24.8932	25.0371	25.0824	24.907	0.0358601	0.0665816	0.819418	POLD2
27.1535	27.9358	27.9108	27.306	26.3044	27.099	26.7016	0.0358914	0.0666602	-0.874893	SLC16A3
22.6632	22.7386	22.9836	22.8666	23.0736	23.9992	23.423	0.0359265	0.0667677	0.685605	MEF2D;MEF2A;MEF2C
27.6321	27.5686	26.9135	27.1066	26.4844	26.9165	26.4266	0.0359637	0.0667139	-0.696081	MRPS23
26.5417	26.0844	26.7938	26.4766	26.1208	24.928	25.5044	0.0361413	0.0670564	-0.956356	ITGA5
21.8649	21.7134	22.1297	22.0771	21.7421	20.5609	20.7384	0.0361763	0.0672309	-0.932476	FARP1
25.6977	25.3638	25.4927	25.343	26.2094	25.9398	25.6643	0.036219	0.0672508	0.463564	GATAD2B
29.9475	29.6983	30.2151	30.2374	30.9088	30.3853	30.4931	0.036259	0.0672803	0.57116	TRIM28
29.1982	28.7535	29.0467	28.9923	29.5383	29.3574	29.2277	0.0362749	0.0672263	0.376752	EIF4G2
29.3406	29.2869	29.8871	29.9477	28.8151	28.7811	29.2203	0.0362903	0.0672077	-0.676751	CAT
27.636	27.6893	26.0559	27.364	26.2339	25.6651	24.8378	0.0363472	0.0672468	-1.60736	NDUFV2
28.1473	28.4828	27.699	27.3592	27.2897	26.9559	26.3289	0.0364878	0.0672858	-1.06391	SEC61A1
26.7907	27.0393	27.2884	26.2129	26.1108	26.1536	25.6483	0.0365414	0.067328	-0.86191	ECHDC1
27.3485	27.4455	26.8257	25.6181	25.5214	25.433	25.1977	0.0365699	0.0673541	-1.42539	CISD2
24.8854	24.7367	24.5738	24.6081	24.9134	24.928	24.9943	0.0366749	0.067377	0.244205	EZH2
25.1296	25.7237	24.3685	23.9767	24.0128	22.6142	22.7234	0.0367793	0.0675722	-1.68284	REEP4
21.4912	21.3957	22.162	20.3733	22.37	22.7076	22.8098	0.0368547	0.0676045	1.27361	TGS1
20.8152	21.8897	21.6151	22.6663	23.3434	24.5312	22.7281	0.0368738	0.0675857	1.78766	ARHGEF10
25.3089	25.4948	26.3579	25.6829	26.3817	26.6217	26.475	0.036954	0.0677006	0.781668	OTUB1
28.8919	28.9767	28.4253	27.9312	27.7429	27.7977	27.7053	0.0369813	0.0677168	-0.807656	SACM1L
26.8423	26.43	25.4108	24.5356	24.0697	24.1236	24.0219	0.0371399	0.0680509	-1.73295	ABCB7
26.3498	26.4077	26.5562	25.9537	25.8183	25.0261	25.8288	0.0372514	0.0682637	-0.759091	ABCD1
24.5485	24.6663	24.0552	23.2322	23.0099	23.2336	22.6895	0.0372716	0.0682413	-1.14784	NDUFAF1
25.5967	25.9915	26.4985	26.2458	26.7858	27.5124	26.6476	0.0374565	0.0685107	0.898833	CIAPIN1
26.7021	26.8264	24.897	24.9483	23.9515	24.4664	23.213	0.0374989	0.0686846	-1.96646	CCDC51
23.6221	23.306	23.1999	23.6494	23.1305	22.5801	21.9306	0.0375486	0.0686492	-0.897298	SNX9
30.2826	30.1675	29.3078	29.2196	28.7369	29.0307	28.397	0.0375553	0.0686013	-1.02286	PNPT1
27.5497	27.6665	27.4605	27.1656	26.1618	27.184	26.6972	0.037606	0.068547	-0.779544	NDUFA6
28.074	28.0654	27.8089	28.1042	27.2644	27.7427	27.7297	0.0376375	0.0685245	-0.434195	GPD2
25.1196	24.6943	25.2318	24.9568	25.2317	25.9164	25.687	0.0376935	0.0686188	0.611041	CD2AP
21.3483	21.6482	21.4075	20.8225	22.0274	21.7951	21.893	0.0377427	0.0686782	0.598554	ZGPAT
23.1547	22.2206	22.6747	20.2825	24.0837	24.1024	24.3633	0.0378228	0.0689015	2.09998	POLR3B
26.874	26.0599	25.5933	26.4597	24.7568	25.0357	25.6501	0.0378735	0.0689701	-1.09919	TAPBP
22.3426	22.055	20.8763	24.3818	24.3638	25.5095	24.982	0.0378765	0.0689158	2.53785	AASDHPPT
28.0822	27.621	27.6558	27.4177	27.2032	26.1809	27.0578	0.0378772	0.0688616	-0.880207	IFITM3
29.4308	29.221	28.9367	28.0074	27.1102	28.0177	27.8715	0.0378802	0.0688075	-1.2325	TMPO
28.6385	28.9562	28.7884	27.9947	28.083	24.2503	24.537	0.0379629	0.0688352	-2.971	BASP1
26.6438	27.0164	25.9836	25.252	24.4928	25.1913	24.8812	0.0380861	0.0690322	-1.36887	SUCLG1
22.826	21.7822	21.3014	22.7843	23.2623	23.4944	23.5686	0.038177	0.0690658	1.26825	POLR3D
28.1316	28.2114	28.1894	28.3922	28.4306	28.524	28.3751	0.0381927	0.0690556	0.212042	PFKM
28.9888	28.8829	28.6246	28.6783	28.6417	28.2171	28.1793	0.0382031	0.0690016	-0.44763	ATP1B3
24.1178	23.49	23.661	24.1215	24.2215	24.5394	24.5434	0.0383437	0.0691196	0.587178	GLA
31.0807	31.0258	31.0854	31.3273	30.8875	30.8982	30.9314	0.0383702	0.0691281	-0.224134	HNRNPH1
23.6707	23.942	23.7725	24.1564	24.3137	24.1655	24.2744	0.0384012	0.0691179	0.36584	MPHOSPH6
26.6165	26.8758	27.1991	26.9289	27.5227	27.772	27.1511	0.038433	0.069117	0.576887	SNX2
31.8833	31.4535	31.7893	31.9589	32.0881	32.1609	32.1879	0.0384644	0.0691099	0.374387	HNRNPM
25.7243	25.686	25.6784	25.8273	26.0537	25.7874	26.0452	0.0385331	0.0691184	0.233081	MAP1LC3B;MAP1LC3B2;MAP1LC3A
25.7951	25.5755	26.0571	25.9436	26.4147	26.159	26.1496	0.0385858	0.0692016	0.398267	PRKAR1A
21.3976	23.5688	23.8236	23.5533	24.9279	25.4355	24.6969	0.0386271	0.0692162	1.93426	CAV1
25.6266	25.2289	25.9033	25.8013	26.2367	25.998	26.2702	0.0387078	0.0692898	0.528261	PQBP1
24.2935	25.1156	25.8819	24.7971	25.8713	26.4136	26.2575	0.0387303	0.0692888	1.15881	PPP1R2;PPP1R2P3
21.2801	21.1575	21.0862	21.1743	21.5604	22.912	21.9086	0.0387757	0.0692785	0.952477	ASF1B
26.2845	26.4971	25.5181	24.7887	24.1899	24.6388	24.528	0.0388086	0.0692961	-1.31986	TAP2
21.8643	21.5189	22.0144	21.9381	22.4964	22.2979	22.0777	0.0389007	0.0694098	0.456713	ALDH16A1
26.8557	26.8427	27.0058	27.4914	27.4408	27.6423	27.6326	0.0389122	0.069356	0.522988	HEXB
23.797	23.4083	23.672	23.6888	24.7374	23.8432	24.3209	0.0389803	0.0694261	0.658961	TRMT6
27.9303	28.2851	29.1215	28.4	29.0557	29.4602	29.4036	0.0390372	0.0695178	0.872306	ASNS
25.5288	25.5466	25.6552	25.6544	25.1608	25.4393	25.4495	0.0390802	0.069532	-0.246417	DNAJC13
21.14	20.7817	21.3146	21.5052	21.9176	22.9838	21.7472	0.0391109	0.0695216	1.03082	RANBP9
20.2624	21.3876	20.5844	21.2874	22.847	21.3558	22.6887	0.0391375	0.069542	1.41674	TAX1BP3
28.153	28.0181	28.268	28.2808	28.4151	28.3614	28.3752	0.0393048	0.0696733	0.203916	THRAP3
24.2523	24.1466	23.7463	24.5215	24.9229	25.0252	24.4946	0.0394083	0.069943	0.647568	SMARCD2
20.2038	21.5079	22.2169	19.9881	22.7761	22.7828	22.6176	0.0394682	0.0699415	1.74635	SLC25A20
25.2345	25.0363	24.0314	24.4441	21.5749	24.0763	20.3892	0.0394805	0.0698878	-2.6731	GADD45GIP1
25.2597	24.372	23.8197	23.1258	22.7083	22.5687	22.7181	0.0395823	0.07	-1.47928	BCKDHB
25.5724	25.3954	25.9346	25.8259	26.0124	26.6185	26.1588	0.0396151	0.0701059	0.581138	IKBKAP
27.9991	27.96	26.6126	27.6216	26.3792	26.7576	25.8832	0.0396525	0.0701135	-1.20828	PYCR2
26.5475	26.5316	26.8201	26.897	26.9316	27.0527	27.0858	0.0396545	0.0700598	0.324286	NUP88
23.5532	23.5843	24.2095	24.3361	24.4111	24.684	25.0476	0.0397997	0.0702695	0.793481	VPRBP
21.7019	22.5669	21.3401	20.7954	20.1805	20.6933	20.0285	0.0398425	0.0703841	-1.30032	LETMD1
27.3904	27.4118	27.6559	27.8212	28.3562	28.1461	27.7687	0.0398626	0.0703823	0.520513	STOM
31.501	31.3419	31.4659	31.2446	31.6372	31.5183	31.7552	0.0399237	0.0704477	0.248516	RPS2
23.3526	22.5629	23.0079	22.8166	23.357	23.6669	23.5234	0.0399662	0.070513	0.580763	WDR6
24.4075	24.2542	22.4966	22.1473	21.5928	21.0382	21.5005	0.039985	0.0704592	-1.94923	COX15
23.7327	23.5254	23.298	25.709	26.3469	25.2873	27.1207	0.039999	0.0704634	2.18533	TPM1
30.9974	31.3379	31.1453	31.3136	30.7654	30.7257	31.0513	0.0400015	0.0704097	-0.351073	CALR
24.7812	24.1702	23.4793	24.5234	25.2898	25.1124	25.1071	0.040016	0.0704323	0.931217	ILK
27.948	28.0716	26.8966	26.8033	26.2396	26.5146	26.1681	0.0401434	0.0707437	-1.12241	FADS1
31.5788	31.9758	32.3826	31.8777	32.4115	32.71	32.4783	0.0401491	0.07069	0.579576	PFN1
28.0556	27.9695	27.9794	28.2492	27.9077	27.568	27.2404	0.0401913	0.0707001	-0.491372	NAPA
31.7974	31.6719	31.3808	31.3794	31.792	32.0453	32.345	0.04023	0.0706464	0.503395	RPS25
21.8245	22.071	22.1331	21.65	21.6119	21.506	21.0872	0.0403424	0.0707445	-0.517928	POLR2I
31.0364	31.1459	31.6558	31.4727	31.6036	32.0971	32.057	0.0403501	0.0706909	0.591489	PRDX6
30.8128	30.6928	31.0739	30.8382	31.1493	31.0534	31.1826	0.0404513	0.0707525	0.274017	GPI
25.8383	26.0479	26.5852	26.6248	25.5739	25.6992	25.6224	0.0405128	0.0707655	-0.6422	NOC4L
29.0789	29.2531	30.2018	30.1299	30.6159	30.6051	30.6147	0.0405134	0.070712	0.946017	SET;SETSIP
20.7881	22.7123	21.6366	20.8262	20.302	19.8592	19.7765	0.0407857	0.0711269	-1.51157	ACAD10
26.2046	26.3052	26.2279	25.9992	25.1683	25.7392	25.9379	0.0409077	0.0711245	-0.569093	ACAA1
25.9626	25.7936	25.5145	25.6472	26.0856	26.3057	25.9602	0.0411909	0.0715445	0.387677	EXOSC9
27.9739	27.9536	27.884	27.4901	27.2426	27.6068	27.2584	0.0412084	0.0714906	-0.456151	IKBIP
23.599	23.3784	23.9489	23.8174	23.4378	22.9155	23.1005	0.0413077	0.0715843	-0.534636	AIFM2
25.2876	25.68	25.9593	25.8073	26.2028	26.0651	26.697	0.0413726	0.0716599	0.638105	TUBB3
31.7253	31.9167	31.7906	31.7822	31.6327	31.7192	31.5855	0.0414811	0.0718887	-0.157878	GANAB
21.6837	21.7961	23.0086	21.7941	21.352	20.6866	20.8462	0.0416748	0.0723125	-1.10898	AGRN
23.9399	24.181	24.6185	24.5188	24.6772	25.1061	24.8889	0.0417011	0.0723333	0.576208	PIN4
22.2426	21.5523	20.5691	21.1844	19.477	20.4422	20.2922	0.0417916	0.0724531	-1.31661	PDF
25.6815	25.571	25.1371	24.6793	24.6461	24.3443	24.5267	0.0418505	0.0725067	-0.761538	LYRM7
29.2781	29.3791	28.8904	28.4396	28.2182	28.393	28.291	0.041924	0.0725843	-0.69605	ACSL3
23.6702	23.3288	23.9048	23.2788	24.1849	23.9497	24.0085	0.0419461	0.0726168	0.502004	DBR1
23.6811	23.4589	24.5326	23.7992	23.0172	19.8066	21.9605	0.041962	0.0726043	-2.27318	LDLR
26.8817	26.6486	26.1009	25.4307	22.3933	25.7128	23.2009	0.0419993	0.0727324	-2.49645	ALG8
25.5715	25.558	25.0872	24.392	24.0361	24.532	23.9357	0.0420215	0.0726841	-0.984266	GPT2
26.0228	26.7833	27.0147	26.8815	27.2115	27.7399	27.4591	0.0420875	0.0728299	0.794573	GLOD4
24.9399	24.7695	24.6251	24.1605	24.0014	24.0902	23.1124	0.0421306	0.0729038	-0.889101	SLC39A14
22.3966	21.827	22.0661	22.1123	22.364	22.5835	22.5847	0.0421601	0.0728674	0.410222	MTOR
27.245	25.7442	27.1194	26.9669	28.0814	27.7117	27.9235	0.0422575	0.0731318	1.13669	ATXN2L
21.8946	22.4547	22.8769	22.6409	22.9592	23.6206	23.2182	0.04253	0.0738065	0.799224	LRSAM1
24.1524	24.3582	24.9299	24.5871	23.4333	24.0074	24.0143	0.0425487	0.0738082	-0.688586	CDC42BPB
24.878	24.4006	25.0403	25.0352	25.8296	25.1551	25.4895	0.0426446	0.074003	0.652871	TNKS1BP1
24.1289	23.7747	23.1541	24.185	24.2511	25.3099	24.974	0.0428505	0.0743727	1.03436	FAM49B
24.3184	23.3982	24.295	23.5347	22.9749	22.6165	23.3374	0.0428683	0.0744807	-0.910313	ACBD5
25.6185	25.6687	24.674	24.8487	26.1327	25.9643	25.9987	0.042948	0.0746182	0.829422	YTHDF2
26.3369	26.3703	26.1923	26.5623	26.6077	27.2715	26.759	0.0430299	0.074723	0.513929	PDCD10
24.0528	23.883	22.0198	22.4228	21.184	21.9084	20.8775	0.0431188	0.0749697	-1.77129	OSGEPL1
26.1289	25.7669	26.6495	26.7421	26.9416	27.4735	27.0113	0.0432487	0.075145	0.82027	LARP4
20.1083	20.8803	21.1163	22.3229	24.1352	23.6141	21.898	0.0432959	0.0751752	2.10884	PARVA
25.8491	24.5151	22.838	23.4782	22.0959	22.3283	21.6756	0.0433184	0.0751492	-2.13681	QRSL1
27.3778	27.3936	27.596	27.4335	27.6529	28.0515	27.6568	0.0435394	0.0755867	0.336838	TPP2
26.5268	26.1159	26.2996	26.6755	26.17	25.2875	25.6703	0.0435435	0.0755546	-0.695159	TRIM56
21.7582	21.7926	21.8333	22.914	22.6605	23.4233	23.2224	0.0435474	0.0754989	1.02756	GMPPB
24.0419	23.8067	23.5146	24.5866	24.8484	24.5322	24.862	0.0436491	0.0757378	0.76011	SEPHS1
26.8595	26.8461	27.0206	27.3583	27.491	27.432	28.2541	0.04366	0.0757086	0.70454	LSM3
25.4267	25.762	26.4067	25.9796	26.4209	26.7402	26.5713	0.0437179	0.0756529	0.683698	PSMD9
24.8199	24.5148	25.0151	24.8001	25.583	25.2379	25.019	0.0437356	0.0755974	0.492458	STAT3
28.7269	28.6491	27.3724	27.995	27.1211	27.3501	26.9885	0.0438182	0.0757416	-1.03264	HADH
21.9155	21.1606	21.7891	21.0634	22.0209	22.3258	22.2456	0.0438459	0.0757212	0.715255	LSM14B
23.6489	23.5094	23.3331	23.6935	23.6793	24.4015	24.1952	0.0438844	0.0757214	0.545784	RRP36
21.1617	21.0518	21.1699	21.235	21.9336	21.2305	21.7745	0.0440151	0.0758095	0.491592	VPS37C
22.2524	23.0118	23.6799	22.3715	23.9111	24.3127	23.6477	0.0440243	0.0757892	1.12829	RBFOX2;RBFOX1
27.1587	27.2313	26.0413	26.3594	25.5075	26.0805	25.2824	0.0440296	0.0757337	-1.07423	TFB2M
21.8361	21.3121	21.1242	21.5347	21.6892	22.5264	22.4423	0.0441614	0.0760819	0.767524	SNAPIN
31.6066	31.3075	31	30.9573	31.745	31.6036	31.7871	0.0442135	0.0760935	0.494064	RPL27A
24.0559	24.6538	25.5473	24.8072	23.4449	24.0127	23.7299	0.0442148	0.076038	-1.03686	TMEM11
25.4877	25.3739	25.6202	25.0343	26.0056	25.7211	25.747	0.044231	0.0760263	0.445531	SRSF5
26.6501	26.3771	26.7519	26.9694	27.1952	26.9509	27.2099	0.0442634	0.0760525	0.431569	PRKAR2A
23.6409	22.9771	24.3199	23.4631	24.4001	24.4636	24.6008	0.0443331	0.0762156	0.887885	GLUL
25.4919	25.5352	26.1474	26.1884	26.9661	26.4046	26.3665	0.0443464	0.0761601	0.738321	COPS6
23.3287	23.3127	24.193	23.1014	22.829	22.6496	22.6459	0.0444289	0.0762095	-0.775797	TPP1
26.8098	26.982	26.0338	26.2867	25.7058	26.0398	25.4605	0.0444938	0.076439	-0.792701	MRPL46
28.4126	28.4349	28.8575	28.5084	29.2699	28.7096	29.3795	0.0445241	0.0763834	0.566349	EIF3I
27.9237	27.9739	27.2727	27.0304	26.7987	26.855	25.7989	0.0446533	0.076537	-1.066	DAP3
27.8821	26.8153	26.9095	27.4739	27.7881	28.2746	28.5138	0.0446539	0.0764815	0.921951	SCARB1
29.3048	29.385	29.9697	29.6833	30.0693	30.0206	30.1125	0.0446656	0.0764406	0.481774	PCNA
28.5937	28.3234	29.2656	29.0206	29.5202	29.3466	29.5895	0.0447205	0.0764518	0.684612	EIF4B
26.114	26.9576	27.8199	27.4856	28.3038	28.412	28.1252	0.0447575	0.0764689	1.18607	CPNE1
22.6517	22.7482	23.8308	23.6271	24.8224	25.1947	23.7218	0.0448746	0.0766016	1.3652	NR3C1
29.2046	29.1925	28.4461	27.7908	27.6494	27.1645	27.742	0.0448747	0.0765462	-1.13986	RDH11
25.1086	25.5143	25.3948	25.5233	25.6055	25.853	26.2552	0.0450359	0.0768462	0.519297	TIMM8B
24.3695	25.0481	24.857	25.1361	24.3041	24.4135	24.146	0.0452192	0.0772929	-0.56479	COL7A1
26.4032	26.5429	26.4001	25.5816	25.1614	25.7297	25.4681	0.0452856	0.0773929	-0.778869	FAM3C
22.5183	22.9086	21.3199	20.8802	20.3406	20.1347	20.6213	0.0453251	0.077438	-1.5412	ALG6
26.2247	26.6075	27.2451	27.1432	27.4645	27.8651	27.4912	0.0453665	0.0774773	0.801825	ADSL
27.1282	27.0355	26.5681	26.3765	24.7096	26.2726	25.8221	0.0454959	0.0775942	-1.17565	MRPL38
25.9858	25.1385	25.9352	25.3136	25.9715	26.7248	26.6701	0.0455452	0.0776592	0.862181	VBP1
25.0036	25.861	26.0872	26.2771	26.5674	26.6287	27.0514	0.0456918	0.077954	0.941949	DCTN2
20.7444	20.738	21.7164	21.0253	21.4724	22.133	22.2793	0.0457187	0.0779555	0.905518	UBAC1
27.3407	27.1669	27.3	27.1902	27.6115	27.6794	27.3093	0.0457383	0.0779426	0.283954	KIAA0368;ECM29
22.8054	21.4667	22.2779	22.7936	23.0608	24.0325	23.416	0.0458392	0.0780674	1.16718	PYCRL
23.8635	23.8157	23.7588	23.8738	23.3163	22.2893	23.443	0.0458463	0.0780258	-0.811717	TNFRSF10B
24.4798	24.4383	24.1472	23.6689	23.0251	23.7638	23.4986	0.0458631	0.0779757	-0.754424	SLC12A4;SLC12A6
23.6329	23.3566	20.7264	23.2068	24.7769	24.8475	24.8885	0.0459304	0.0780601	2.10695	PHAX
23.9416	23.9723	24.5172	24.8781	22.9832	23.6856	23.6859	0.0459861	0.0780701	-0.875737	LONP2
27.0061	27.1151	26.4131	25.7972	25.6408	25.715	25.5209	0.0460135	0.0780343	-0.957319	MRPS9
24.2764	24.4838	23.576	23.6928	23.3188	23.4571	22.8658	0.0461313	0.0780471	-0.793371	DDX28
26.8867	26.8735	26.2901	26.0073	25.6864	25.8706	25.8922	0.0461372	0.0779914	-0.698043	STT3B
25.2708	25.6663	25.1204	24.1095	24.0735	24.1635	23.4645	0.0462192	0.0781725	-1.14123	ALDH2
24.637	24.3659	23.0433	22.3187	21.9971	22.0575	21.424	0.0464856	0.0786581	-1.76502	ATAD3B
24.3871	24.191	23.2999	24.1987	25.027	25.4951	24.5003	0.0464931	0.0786192	0.988304	SPIN1
23.2461	23.0071	23.6471	22.482	23.9311	23.879	23.7708	0.0465141	0.0785633	0.764757	HNRNPLL;HNRPLL
26.2914	25.7746	25.6656	25.539	25.3969	24.2255	25.0636	0.046639	0.0787065	-0.922281	C7orf50
27.2644	27.2454	27.68	27.3428	26.5662	26.865	27.1944	0.0466772	0.0786932	-0.507928	SPR
25.7324	25.5893	24.9146	24.3661	24.3148	24.2271	23.4784	0.0466872	0.0786969	-1.14382	NSUN4
28.2883	28.4602	28.0742	27.6717	27.5955	27.6505	27.5194	0.0466948	0.078661	-0.535176	MTCH2
22.2314	22.1119	23.1593	23.1347	23.2744	23.6753	24.0339	0.046745	0.0786931	1.00189	SP100;SP140L
24.6321	24.7389	24.0476	24.0339	23.6671	23.9141	23.6868	0.0469185	0.0789603	-0.607143	MGAT1
29.1418	29.2979	29.9278	29.6899	28.9286	28.7551	29.0776	0.0469368	0.0789469	-0.593896	PDIA6
24.0661	24.1984	24.2572	24.287	24.7526	24.3247	24.4725	0.0469497	0.0789364	0.314416	ZC3H18
24.6011	24.1371	22.5514	22.7268	22.1529	19.2495	21.5846	0.0470372	0.0789456	-2.50844	TIMM21
21.4648	21.1791	21.951	20.3384	22.1564	22.1857	22.7506	0.0470813	0.0790989	1.13092	CACTIN
28.5841	28.8414	29.3883	29.1703	29.5508	29.6977	29.4542	0.047093	0.079043	0.571562	PSMD2
25.5408	24.2629	25.0739	23.4941	23.2125	23.2542	23.1076	0.0472448	0.0791678	-1.40151	MRPL20
24.6503	24.4041	25.0764	24.9261	25.2747	25.0998	25.4596	0.0474337	0.0796617	0.513787	CSK
23.8253	23.1041	23.8829	23.9566	24.4084	24.4581	24.1487	0.0476154	0.0799803	0.646188	RFX1
25.901	26.5845	26.5936	26.3816	26.6861	27.096	27.0344	0.0476191	0.079924	0.573643	APOL2
20.5496	20.1273	19.0036	22.2689	23.8571	23.4778	21.7264	0.0478478	0.0804641	2.53308	UBE2O
27.6393	27.7058	26.6833	25.9574	25.2177	26.0725	25.4987	0.0478858	0.0805313	-1.40013	USMG5
26.2678	25.7037	26.1415	25.8564	26.2887	26.4654	26.4846	0.0479	0.0804747	0.420559	RPP30
27.6506	27.3751	27.8535	27.5979	27.7794	28.1754	28.1195	0.0479954	0.0806456	0.405488	CAD
28.9617	28.9733	28.9893	29.5992	29.6412	29.4952	29.8427	0.048054	0.0807714	0.528848	PSMA5
23.019	22.7043	22.9118	23.0405	23.1979	23.1396	23.1404	0.0480926	0.0807344	0.240406	GTF2H4
27.6312	27.7192	27.496	27.5115	27.8845	27.6697	27.9335	0.0481179	0.0807115	0.239779	AIMP1
22.9779	23.6304	22.1997	23.5498	24.2292	23.9828	24.1426	0.0481471	0.080697	1.02871	PSMF1
24.3647	24.3671	25.0313	25.1217	25.792	25.3521	25.2255	0.0482843	0.0809259	0.735358	COPS7A
27.3003	27.3694	27.9593	27.4487	28.1636	28.0649	27.843	0.0483286	0.0808889	0.504391	TCEB1
29.1189	29.2507	27.9992	27.4265	26.3637	27.6409	26.4833	0.0484525	0.0811369	-1.6195	AFG3L2
21.2687	20.6774	21.6605	21.3432	21.7107	21.9075	22.1919	0.0484704	0.0811082	0.699277	GMIP
22.1135	23.2774	23.8727	23.4202	23.9316	24.5805	25.0204	0.0485085	0.0810739	1.33986	VPS25
24.7765	24.4247	25.1145	24.2499	25.2515	25.4646	25.104	0.0485102	0.0810174	0.631932	FHOD1
24.4055	24.3625	24.7202	23.8352	24.8013	24.9936	24.9266	0.0485539	0.0810306	0.576365	ASF1A
21.0884	21.0473	22.9915	22.8147	23.5458	23.8882	23.4799	0.0486524	0.0812331	1.6525	HIP1R
30.8451	30.7516	30.9514	30.8278	30.7631	30.4622	30.2247	0.0487284	0.0812935	-0.360651	MATR3
25.9739	25.3423	25.9186	25.6781	26.5465	26.5232	25.9491	0.0487455	0.0812453	0.611386	PLAA
28.0138	28.0226	28.3504	28.1745	28.7799	28.5287	28.2876	0.048932	0.0815278	0.391748	TCERG1
24.2446	24.1553	24.1221	24.0393	24.2266	24.3789	24.5709	0.0489426	0.0815156	0.251811	CHD3
27.1026	27.4206	27.232	27.2087	27.0754	26.9992	26.7195	0.0490181	0.0815617	-0.309624	SEC23A
24.5668	24.4676	24.6297	24.4362	24.8736	25.1548	24.6237	0.0490647	0.0816798	0.358966	KDM2A
24.8333	24.3846	24.2738	24.2569	24.7168	24.9255	25.1236	0.0491541	0.0817479	0.484794	COPZ1
24.3028	23.8256	24.5612	24.6121	23.6549	23.6164	23.934	0.0493305	0.0820318	-0.590336	SKIV2L
27.7628	27.6796	28.4748	28.3317	28.7423	28.7232	28.5808	0.0493816	0.0821134	0.619881	PSMD11
26.7601	26.7455	27.1491	27.3679	27.5066	27.5066	27.4157	0.0494346	0.0821341	0.470643	DNM2
18.9149	18.9273	19.7838	18.4208	21.2963	19.4561	20.6207	0.0494985	0.0822514	1.446	MFI2
25.4334	24.9357	24.4882	24.8729	24.6681	21.3013	20.9257	0.0495252	0.0822526	-2.63416	HLA-A
27.1036	26.8889	26.9222	26.7148	27.0022	27.5975	27.6058	0.0496641	0.0824828	0.494464	PHF6
25.4672	25.2705	25.8273	26.269	26.1419	26.8272	26.5393	0.0496893	0.0825196	0.794289	GCLM
25.4653	25.956	25.1585	24.3878	24.3176	24.0512	24.3031	0.0498267	0.0828595	-1.01794	FKBP11
23.3681	21.9115	21.0753	23.5097	24.6063	24.0853	24.1733	0.049881	0.0829016	1.82215	TLE3;TLE2;TLE1;TLE4
27.0434	26.6373	26.9825	27.0859	27.1718	27.4654	27.2625	0.0500181	0.0830894	0.362607	PRRC2C
23.8676	24.1932	24.6218	24.3723	23.5551	23.9924	23.4009	0.0501177	0.0832302	-0.614259	SLC30A1
27.5263	27.4283	27.2642	27.5789	27.6289	27.7062	27.6602	0.0501503	0.0832033	0.215687	XRN2
22.805	21.3202	22.4617	19.8233	23.5483	24.1746	23.4026	0.0501735	0.0831791	2.10597	UBE2C
24.6012	24.5434	24.6574	24.7367	25.0156	24.7206	25.2873	0.0501742	0.0831221	0.37316	WDR48
26.8887	27.2445	27.342	26.6461	26.0142	26.806	26.0748	0.0504618	0.0838245	-0.732	NDUFA2
28.6453	28.3642	28.7862	29.0036	29.0378	29.7933	29.1891	0.0504719	0.0837945	0.640215	EIF4H
26.5638	26.5542	26.9256	27.0438	26.3617	26.4944	26.1169	0.050554	0.0839316	-0.447534	NUP35
22.1493	23.1091	22.1142	22.1892	21.4388	21.7497	21.7119	0.0506077	0.0839261	-0.756989	ATP6V0A2
23.8066	24.0202	24.1189	23.6488	23.2839	23.6796	22.7463	0.0506281	0.0839125	-0.66201	RBBP6
23.0244	22.3327	21.7876	20.7903	23.2644	23.4052	23.6134	0.0507159	0.0840792	1.44393	MED20
25.0816	25.2391	24.4261	25.1167	24.544	23.92	24.383	0.0507609	0.0841201	-0.683564	ABCB6
20.4727	19.6896	21.8783	20.8509	22.4158	22.0401	21.9424	0.0508513	0.0842565	1.40987	FAM129A
21.9202	22.2504	22.4623	22.5988	21.8563	20.7952	21.7362	0.0508927	0.0842372	-0.845313	CBX4
28.1036	27.9897	27.5019	27.616	27.2637	27.5082	26.8818	0.0511344	0.0845722	-0.584875	UQCRB
23.4161	23.1121	22.4206	24.5676	24.6303	24.8031	24.7716	0.0511752	0.0845827	1.35593	COPS8
28.7534	28.9493	29.6491	29.1824	29.8011	29.8112	29.5936	0.0511912	0.0845388	0.601751	FSCN1
31.0168	31.3384	31.0969	31.557	30.8901	30.9448	30.758	0.0512328	0.0845085	-0.387976	HNRNPAB
29.923	29.7727	29.9893	30.0922	30.2052	30.0855	30.1964	0.0512778	0.0845109	0.218089	PUF60
25.4163	26.3338	26.4443	28.0024	25.4468	23.3769	24.6293	0.0513527	0.0846001	-2.06486	MCFD2
29.9948	29.8932	30.0819	29.8271	30.131	30.1586	30.0842	0.0513666	0.0845427	0.175336	BZW1
22.2446	21.4435	21.3145	22.7873	22.6868	23.1772	23.3719	0.0517782	0.0852637	1.13116	TBC1D13
26.6321	26.3073	26.2597	26.497	27.1498	27.4446	26.5423	0.0517972	0.0852466	0.62153	FLII
30.0811	30.1539	30.6028	30.696	30.8262	30.8699	30.8578	0.0519269	0.0854245	0.467876	RUVBL2
24.1431	24.5744	24.7752	25.2893	25.291	25.4483	25.5358	0.0521674	0.0857916	0.729527	DUSP12
27.3156	27.3249	27.4943	27.539	27.2876	27.2187	27.2083	0.0522013	0.0857823	-0.180232	NUP160
25.9603	26.3129	26.3967	26.1973	25.7601	25.915	26.0078	0.0524268	0.0861216	-0.322527	UFSP2
27.764	27.747	27.8827	27.0091	26.9779	27.1532	26.6012	0.052427	0.0860635	-0.689962	DDX50
26.034	26.2989	26.3604	25.6083	25.8529	23.9786	24.5498	0.0524302	0.0860054	-1.28165	UTP11L
26.9265	27.1986	26.4486	25.8349	25.5409	25.9559	25.443	0.0524547	0.0860148	-0.955546	SIGMAR1
25.3813	24.6041	23.6278	24.613	23.0599	22.9908	23.8991	0.0525605	0.0861375	-1.23994	GRPEL2
23.9153	22.6086	22.9934	23.4111	21.4705	22.6612	22.2164	0.0525622	0.0860795	-1.11605	TRUB2
31.5284	31.2981	31.4825	31.849	31.9728	31.8139	31.9003	0.0526076	0.0861346	0.3562	SFPQ
26.207	26.0397	25.7495	26.4409	26.5156	26.7408	26.4772	0.0526132	0.0860767	0.468636	PPT1
22.5456	22.5108	22.8279	22.1925	22.746	23.0613	23.1583	0.0527315	0.0862823	0.469337	TUBGCP2
25.9159	25.936	25.2998	24.8487	24.5865	24.9218	24.5026	0.0528634	0.0863882	-0.829794	ERMP1
19.9388	21.7757	21.3477	21.3971	22.1259	22.4549	22.4398	0.0530123	0.0867087	1.22539	DERA
31.5236	31.5358	32.1618	32.1691	32.4845	32.3535	32.3685	0.05307	0.0868142	0.554599	YWHAE
31.4122	31.4772	32.096	31.6727	32.0827	32.4403	32.0565	0.0531143	0.086815	0.528675	NME1-NME2;NME2;NME2P1
28.0863	28.3168	26.9449	25.4661	23.8319	26.1686	24.1777	0.0531871	0.0869578	-2.47745	SLC25A1
26.468	26.8039	26.5186	25.7316	25.7662	25.7468	25.5283	0.0532133	0.0869317	-0.700126	SPTLC2
24.3996	25.0922	24.9317	24.9039	25.0669	25.7057	25.522	0.0532851	0.0869779	0.599692	NCSTN
27.2477	27.0357	25.1597	26.376	24.9213	24.6334	25.3865	0.0532927	0.0869412	-1.47441	NDUFS8
23.3129	23.1432	21.327	23.175	24.113	23.9475	24.5075	0.0533128	0.0869365	1.44982	ANXA4
24.5006	24.2874	23.9009	25.6157	25.3982	26.0333	25.7847	0.0534478	0.0871562	1.16263	CDCA8
30.0664	30.1998	30.5621	30.4533	30.5177	30.8688	30.7931	0.0534731	0.0871648	0.406146	KHSRP
31.1897	31.1982	31.1355	30.9363	30.8121	31.0247	30.7313	0.0534892	0.0871067	-0.25887	VDAC2
25.5638	25.5025	25.8803	26.1353	26.4098	26.2205	26.1075	0.053494	0.0870486	0.475499	GPS1
20.4656	21.9408	21.8868	22.056	22.7842	22.78	22.5778	0.0535091	0.0869907	1.12669	CHMP7
22.4434	22.6048	22.2213	24.0294	24.3121	23.7221	24.289	0.053557	0.0871138	1.28302	HYPK
27.9486	28.1047	28.9854	28.7746	29.2517	29.3439	29.0695	0.0536586	0.0873191	0.768358	GMPS
23.8211	24.3395	23.9544	23.6935	23.3884	23.6767	22.9095	0.0536943	0.0872744	-0.627271	ADAM10
29.6816	29.5772	29.7915	29.9493	29.9883	30.0385	29.9505	0.0537061	0.0872908	0.242521	IARS
25.3682	25.4428	25.5363	25.6241	25.5792	25.8448	26.0573	0.0537606	0.0872754	0.334278	L1CAM
28.702	28.0944	29.6835	29.2892	29.793	30.148	30.0504	0.0538125	0.0872573	1.05485	COTL1
28.9215	28.7005	28.7066	29.0013	29.1868	28.9535	29.3487	0.0538341	0.0872604	0.330521	EDC4
22.8677	22.6796	23.0857	22.9361	22.5865	22.6172	22.6956	0.0539239	0.0873589	-0.259174	PATL1
23.4682	23.7115	23.3129	23.1134	22.8078	21.6947	22.9557	0.0539413	0.0873408	-0.915416	MICU1
30.9229	31.2512	30.6126	30.2843	30.079	30.3224	29.9084	0.0540321	0.0875582	-0.66448	PGRMC1
23.5081	22.9666	23.0966	23.3339	23.4032	23.8251	23.9027	0.0540993	0.0876008	0.484029	C11orf30;EMSY
28.1808	27.9918	27.3076	27.6984	26.4384	27.3644	27.1431	0.0541513	0.0875694	-0.812688	TSFM
24.2884	24.2762	24.5092	24.1432	24.6447	25.1372	24.5077	0.0542821	0.0877914	0.45897	RBPJ
25.4038	25.3114	25.7136	25.4083	26.0014	26.0253	25.5676	0.0543262	0.0878206	0.405467	PPAT
23.1237	22.9635	22.1319	22.9491	21.8777	22.2808	22.1013	0.0543655	0.087913	-0.705434	TMEM9
24.0431	23.7261	23.3448	23.7541	22.1247	23.4004	22.9557	0.0543716	0.0878867	-0.890089	CNNM3
24.8934	25.0841	24.3727	24.7384	23.8313	24.5853	23.5784	0.0545234	0.0880922	-0.773789	MRPL48
23.0202	22.948	21.782	23.1731	23.6035	23.6332	23.8251	0.0545564	0.0880632	0.956483	CUL2
28.4252	28.5425	27.7592	27.8316	26.9529	27.8879	26.7362	0.0546297	0.0881289	-0.947257	COX7C
26.4485	26.2358	25.9913	25.6367	25.4257	25.7069	25.4596	0.0546298	0.088071	-0.547347	OSBPL8
23.6304	22.9282	24.5779	23.9923	24.535	25.159	24.9169	0.0546808	0.0880525	1.08811	ABCF3
24.2968	25.9073	25.3251	20.3801	20.7095	19.9703	20.1329	0.0546878	0.0879948	-3.70644	MGST2
24.3667	23.9278	24.5923	24.3357	22.1154	23.3306	23.9211	0.0546971	0.0879843	-1.18324	NIT2
25.6802	25.7366	25.1682	26.2049	26.3492	26.4071	26.2399	0.0547227	0.0879659	0.634624	SEC23IP
27.5274	27.8745	27.4931	26.9625	26.7685	27.1151	26.408	0.0547312	0.087924	-0.700516	GOLM1
25.6874	25.7759	26.3562	26.1347	26.4805	26.5087	26.3806	0.0547943	0.0880838	0.468047	PUS7
22.8506	23.7	23.1958	22.9202	22.7341	20.5474	21.8848	0.0549187	0.088191	-1.44455	SAP130
26.8446	26.7769	26.977	26.993	26.6469	26.7754	26.748	0.0549373	0.0881725	-0.174436	SNX27
22.794	22.4946	23.7158	23.3719	23.7716	24.167	23.889	0.0551804	0.0885408	0.84848	DNAJB4
22.6899	23.288	22.4978	20.772	20.6814	21.1008	19.9269	0.0554208	0.0889556	-1.74223	ETFDH
27.3311	27.0374	27.312	27.0548	27.5571	27.6709	27.3019	0.0554724	0.0889706	0.326172	DDX24
27.3674	24.9112	25.5392	26.5685	27.9247	27.6488	27.5646	0.0554759	0.0889335	1.61612	SH3GL1
24.6632	24.774	24.61	24.4869	25.0186	24.7268	24.9005	0.0556038	0.08917	0.248428	PCBP2
21.1796	20.8309	20.7344	19.5503	22.0432	21.2494	21.9039	0.0556398	0.0891328	1.15841	CDCA7L
27.7909	27.2995	27.6379	27.1387	27.9146	27.8955	27.9111	0.0558502	0.0894262	0.440291	EIF2A
24.1448	24.1366	24.3748	23.2939	23.3484	23.1132	23.3516	0.0558572	0.0893992	-0.716448	DECR2
22.8938	23.9345	23.3354	24.5162	24.6957	24.6157	24.8341	0.0559734	0.0896842	1.04519	HEATR3
22.5571	22.1147	22.2537	21.5705	22.5193	22.847	23.0971	0.0560339	0.089774	0.697152	PURA
25.6702	25.9471	25.3656	25.6277	24.5782	25.3886	25.1615	0.0560355	0.0897158	-0.609893	DNAJC11
26.7645	26.7129	26.391	25.9971	25.5776	26.1978	25.6501	0.0561713	0.0897691	-0.657875	GLS
25.2574	25.4126	25.6772	24.3682	24.12	24.5005	24.3325	0.0562802	0.0899209	-0.861222	TM9SF2
28.2935	28.131	26.1831	26.2083	25.1488	25.7759	25.4467	0.0563219	0.0899041	-1.74687	NDUFA13
26.6253	27.1565	27.8457	27.1241	26.1197	26.5496	26.5295	0.0564232	0.0900738	-0.788298	MTX2
22.0022	21.4618	21.8557	21.153	19.7134	20.425	21.3412	0.0564569	0.0900673	-1.12496	BRWD1
32.1379	32.2562	32.4484	32.5958	32.7112	33.0307	32.5671	0.0564715	0.0900401	0.410124	LDHB
28.0024	27.8943	27.7959	27.6849	27.945	28.3429	28.6623	0.0565632	0.09023	0.472345	GAR1
22.7643	22.4269	22.976	23.7218	23.4411	24.0749	24.2364	0.0565741	0.090195	0.945231	ILKAP;ILKAP3
26.4267	26.4399	26.6207	26.5985	26.7378	26.6776	26.6344	0.0565965	0.0901368	0.161793	ARID2
31.6179	31.3968	31.4805	31.4839	31.8648	31.5632	31.7282	0.056797	0.090303	0.223953	PA2G4
29.1726	29.1425	27.934	28.1455	28.0816	27.187	27.0304	0.0568254	0.0902655	-1.16565	BCAP31
26.8334	26.8969	26.1137	26.937	25.9871	26.217	26.1264	0.0569373	0.090452	-0.585075	MRPL13
27.2538	26.9205	27.2521	27.2284	27.4511	27.337	27.452	0.056977	0.0904556	0.249664	SUMO1
26.3623	26.0721	26.453	26.4983	26.4913	26.7682	26.8721	0.0570734	0.0906289	0.364109	EIF2AK2
18.6701	18.4395	19.1069	19.2996	20.1905	19.0992	20.5735	0.0571256	0.0905964	1.07536	SMEK2
20.8285	20.7039	21.9017	20.2658	19.0742	19.1624	20.4484	0.0571462	0.0905382	-1.36329	C16orf62
22.8485	23.5077	22.809	22.8321	22.1064	22.1935	19.9703	0.0571981	0.0905725	-1.57595	PEX13
25.3641	25.6269	26.4974	26.3071	27.225	26.4796	26.8483	0.0572303	0.0905478	0.90208	MAP2K1
23.2276	22.9923	22.3029	21.9057	20.615	21.8081	21.7884	0.0572592	0.0905359	-1.2033	PARL
24.7061	25.2447	26.009	25.2411	26.2311	26.0828	25.9711	0.0573481	0.09077	0.794768	LRPAP1
24.9052	25.2817	25.5944	25.258	25.9391	25.4771	25.8856	0.0575088	0.0911447	0.507439	DNPH1
24.2575	23.8754	23.9279	23.9124	23.574	21.4551	19.2917	0.0575315	0.0912041	-2.55303	ERI1
24.8045	24.3743	25.2549	24.944	23.9142	24.4801	24.253	0.0577536	0.0914501	-0.628671	MRPL55
29.3012	29.1456	29.1977	28.5879	28.813	28.1456	28.3739	0.0578138	0.0915374	-0.613936	RPL21
25.408	25.5895	24.623	23.308	23.1462	22.9675	23.4752	0.0578389	0.0915658	-1.53586	PREB
21.1145	20.8889	23.2835	21.2542	19.5137	18.6729	20.6948	0.0578597	0.0915073	-2.00815	STX18
26.7538	26.3289	26.4855	26.3387	27.1031	26.7974	26.6847	0.0578636	0.0914745	0.384978	CSNK2B;CSNK2B-LY6G5B-1181;CSNK2B-LY6G5B--991
26.2838	25.9472	24.3341	25.8635	24.2583	24.3068	24.4651	0.0580413	0.0915717	-1.26373
30.2594	30.4759	30.4323	30.3827	30.4528	30.6202	30.7286	0.0580893	0.0916127	0.212962	SERPINH1
21.5882	20.0888	19.1591	22.8742	23.0247	23.4609	23.4746	0.0580897	0.091585	2.39245	BRD8
23.073	23.137	23.5444	23.6419	23.8608	23.6909	23.773	0.0581107	0.0916132	0.425863	CHMP1A
25.5175	25.1305	25.4768	25.4657	25.5555	25.7287	25.9251	0.0585279	0.0921602	0.338819	NUMA1
23.1928	21.0899	25.0183	25.1198	26.1706	26.6213	26.2811	0.0585794	0.0921525	2.75246	LIMS1
23.8406	23.9213	23.7328	23.7887	22.3129	23.0675	23.6638	0.0586957	0.0923708	-0.806112	RAB1A
22.1577	22.595	23.4093	23.379	23.9808	23.8525	23.5783	0.058768	0.0923985	0.918626	SMAP1
23.3824	23.7307	24.5441	24.2832	24.729	24.7572	24.7446	0.058794	0.0923399	0.758526	TBCE
29.7034	29.7277	29.8111	29.6052	30.0911	29.7483	30.0553	0.0589958	0.0926692	0.253031	YBX3
27.0817	27.0945	27.2041	27.4975	27.6766	27.386	27.5813	0.0590019	0.0926232	0.328546	CMBL
25.1398	24.4803	24.8322	25.2347	25.3941	25.8935	25.3178	0.0590329	0.0926177	0.613382	ARL3
27.6842	27.8879	28.3345	28.3423	28.524	28.6218	28.4841	0.0593611	0.0931841	0.481115	TCEB2
30.3549	30.3764	30.5941	30.6038	29.7617	30.3329	30.1675	0.0597837	0.0939292	-0.394952	AK2
21.7161	22.1168	22.7479	21.8868	22.9257	22.6724	22.7483	0.0598238	0.0939103	0.665246	FOXP1
24.2804	23.7376	23.3546	24.0218	23.2544	23.3681	23.1853	0.0598662	0.0940631	-0.579318	PTPN2
26.3088	26.7317	27.0231	27.047	27.3801	27.2442	27.2176	0.0600087	0.0942814	0.503007	ANXA7
24.0939	25.1327	22.582	23.5845	22.3748	22.2614	22.3408	0.0600318	0.0942522	-1.5226	CLPTM1L
26.0293	25.8281	26.5961	26.0286	25.9159	24.9066	25.2468	0.0602441	0.094528	-0.76412	RPRD1A
31.8759	32.1402	32.3569	32.4893	32.5096	32.6551	32.677	0.0602467	0.0944987	0.398307	CALM2;CALM1;CALM3
27.6536	27.3819	27.4777	27.5138	27.5573	27.9354	28.05	0.0606269	0.0951466	0.340844	RRP9
24.732	24.301	25.3664	25.4397	26.4508	25.5626	25.7176	0.0607384	0.0952302	0.950612	SWAP70
25.7243	25.7819	26.6518	26.2682	25.0645	25.6642	25.4392	0.0607911	0.0952533	-0.717239	CTH
24.8797	24.2625	24.1459	24.7026	25.189	24.8388	25.088	0.0608985	0.0954874	0.540918	ANKZF1
26.1268	26.1346	25.8471	26.7789	26.6283	27.1115	26.8142	0.0611001	0.095774	0.629439	IPO9
21.9811	22.0537	22.4638	21.879	22.3592	23.3162	22.6416	0.0612046	0.0959774	0.677968	ZNHIT2
30.5718	30.7122	29.2982	28.8727	28.4481	28.8986	28.0844	0.0614451	0.0962834	-1.3867	COX4I1
25.0271	25.9588	26.1131	26.3513	26.718	27.2057	26.4623	0.061572	0.0964461	0.932804	PAFAH1B1
24.5173	24.4102	20.7606	20.9432	25.6249	25.5127	25.7205	0.0618835	0.0968265	2.96159	LSM7
25.2922	24.0793	23.9809	26.0939	25.9922	26.3598	26.736	0.0620357	0.0969812	1.50108	DPP3
19.6551	21.1179	19.6499	22.4087	22.6493	22.649	22.4784	0.0620422	0.0969206	1.88432	MLLT4
30.2935	30.2868	30.9245	30.8106	31.1482	31.0352	31.0065	0.0621176	0.09699	0.484436	CCT5
22.0144	22.1494	21.3065	23.0738	23.6702	23.069	23.0051	0.0621965	0.0970768	1.11205	WAC
24.8371	26.1274	25.5925	24.7639	24.2008	23.9303	24.7486	0.0625118	0.0974981	-1.03699	MTCH2
24.1593	24.158	24.4662	24.2229	24.1235	23.9981	23.8254	0.0625466	0.0975671	-0.269267	FAM91A1
25.0414	23.2069	24.7926	24.3623	24.9028	26.2815	26.2616	0.0627237	0.0978828	1.46447	KPNA1
28.537	28.3074	28.3263	28.0344	28.8043	28.5621	28.5437	0.0628949	0.0982854	0.335407	IGF2BP1
22.0327	22.9835	23.3902	22.4129	24.3095	23.7271	23.2308	0.0629402	0.0983611	1.05096	HIRIP3
30.1147	29.9204	30.1422	30.2464	29.9056	29.5106	29.917	0.0629423	0.0982999	-0.328206	EPPK1
26.252	26.2669	26.6101	26.5528	26.5905	26.7879	26.7559	0.0629601	0.0982388	0.291	HNRNPK
29.9484	29.9661	30.8398	30.8744	31.347	30.979	31.1831	0.0630181	0.0983244	0.762527	ANP32A
29.5163	29.6575	29.9609	29.7266	30.0112	30.2985	29.8971	0.0630218	0.0983006	0.353636	NHP2L1
23.0342	22.4735	24.2034	23.0983	24.0813	24.0886	25.025	0.06305	0.0982619	1.19595	PRKAG1
21.4597	21.6433	21.4864	20.7012	20.6484	20.6962	20.815	0.0630933	0.0983102	-0.602784	TRMU
23.5997	23.5116	23.418	22.5302	23.6902	24.1625	24.3215	0.0631437	0.0982963	0.793201	MTR
23.5989	21.1268	23.4464	22.0954	23.9248	24.3097	24.5397	0.0631677	0.0982503	1.69115	C9orf64
27.6565	27.619	25.7124	25.9852	25.1484	25.6677	24.7489	0.0632697	0.0983604	-1.55492	SLC25A4
23.8676	25.1353	23.3068	25.1086	26.1918	25.6053	25.3867	0.0633557	0.0983936	1.37335	NCBP2
23.1407	23.1575	20.6835	22.0782	23.5946	24.1086	24.1329	0.063418	0.0984762	1.68037	CLASP1
26.5863	26.495	26.9867	26.4468	26.0776	26.3923	26.2473	0.0635254	0.0985612	-0.389605	PPAN-P2RY11;PPAN
22.6377	23.1303	22.2504	22.1331	20.2797	22.0189	21.642	0.0637046	0.0988141	-1.22437	SLC25A32
23.5875	24.3899	24.6285	25.5265	25.7913	25.6912	25.5118	0.0637734	0.0989481	1.1317	KIAA1279
25.3951	25.4703	25.1901	25.1267	25.4017	25.7464	25.6624	0.0639247	0.0990796	0.307987	DIEXF
31.7067	31.7848	32.5526	32.3265	32.5445	32.985	32.6526	0.0640297	0.0991714	0.634739	ALDOA
21.565	21.8157	23.452	24.1294	24.2286	24.8829	24.4757	0.0641296	0.0993321	1.78853	UBE2T
27.4988	27.8463	28.0502	28.0291	28.2167	28.1268	28.3949	0.0641391	0.0992783	0.39	RRM1
26.3111	26.5616	24.8631	24.8698	23.9791	24.6894	21.6892	0.0643908	0.0995963	-2.19885	AARS2
26.2227	26.0342	26.1675	26.1648	26.2716	26.2309	26.4259	0.0644372	0.0995646	0.162184	SYMPK
27.7687	27.4531	26.947	27.3664	26.4936	26.8401	27.0775	0.0645178	0.0996804	-0.580038	RAB10
27.4146	27.1978	27.4184	27.1571	27.5133	27.4365	27.5638	0.0646196	0.0998329	0.207541	LAMB1
22.6604	22.4238	22.0661	22.3273	22.4589	23.3585	23.6541	0.0649027	0.10029	0.787761	TTF2
23.9013	23.1845	23.7218	24.2362	24.7224	24.047	25.0404	0.0649445	0.10025	0.842293	TRRAP
21.5812	20.5232	21.262	22.0763	20.3612	20.2553	20.6524	0.0649789	0.100272	-0.937714	SRSF4
23.1673	23.1233	23.0313	24.1772	24.1648	24.1183	24.0951	0.0649801	0.100211	0.75126	POLD3
24.8607	25.1393	26.1621	25.6085	26.5301	26.4715	25.9494	0.0650485	0.100289	0.874327	ESD
27.0553	27.2455	25.5084	25.6501	24.9454	25.5195	23.9597	0.0650615	0.100289	-1.55661	TMED4
24.2182	20.9076	22.3256	23.7917	20.5245	20.6459	20.9272	0.0650867	0.100335	-2.11155	TCF20
26.6906	26.4507	24.9887	26.1043	24.2287	25.3115	24.967	0.0651943	0.100406	-1.22284	SCD
20.8752	21.9141	20.6886	21.1647	19.7001	20.1866	20.7339	0.0652336	0.100437	-0.953756	FASTKD3
26.5068	25.4157	26.6999	26.2332	21.1414	20.8319	26.1752	0.0653909	0.100711	-3.49774	ACAD11
23.7198	23.7344	21.1996	21.593	20.8699	20.7051	20.3984	0.065536	0.100942	-1.90391	MT-ND5
23.4099	23.609	24.7692	24.1873	24.663	25.2446	24.8277	0.0655362	0.10088	0.917931	PXN
23.2996	23.0177	22.757	22.5439	22.2724	22.6516	22.1961	0.0659424	0.101567	-0.531216	PTRH1
25.823	25.8043	26.5024	26.0485	25.4937	25.6071	25.6532	0.0660267	0.101808	-0.459891	SPTBN2
28.3493	28.3217	27.024	27.5714	20.8056	27.6879	22.4798	0.0660811	0.10186	-4.15885	PRKAG3
31.4978	31.708	31.6354	31.391	31.7865	31.6819	31.9196	0.0661215	0.101825	0.237956	RPL23A
28.4645	28.5203	29.1949	29.0821	29.1986	29.359	29.942	0.0661318	0.101816	0.684414	YWHAQ
25.3921	25.6312	26.1076	25.5336	26.3702	25.935	26.1806	0.066194	0.101806	0.495818	METAP2
27.2756	27.3504	27.3913	27.7201	27.184	26.8494	27.2076	0.0663085	0.101919	-0.354037	CCDC58
22.1612	22.0312	22.3005	21.5027	21.1617	21.6631	21.4861	0.0663116	0.101857	-0.561923	AMACR
24.651	20.2339	22.9015	23.1897	24.1226	26.5573	26.5611	0.0663946	0.101924	3.00301	RSRC1
26.882	26.9328	26.9318	26.8604	27.2387	26.9549	27.0316	0.0664684	0.101993	0.173324	NOL7
22.1653	20.5257	21.7956	21.6046	23.622	22.5822	22.2039	0.0664729	0.101931	1.27987	DAPK3
24.7344	24.8303	25.4844	24.1209	25.4774	25.6132	25.6148	0.0668316	0.102533	0.775973	DCAF7
25.6409	25.2098	26.0664	25.5078	25.9494	26.2081	26.2186	0.0674171	0.103468	0.519089	BPNT1
31.7084	31.6294	31.5259	31.1104	30.4972	31.267	31.0008	0.0675527	0.10379	-0.571874	LRRC59
25.2452	25.5063	26.0517	25.883	26.2527	26.3143	26.0322	0.0676191	0.103855	0.528164	PPP6R3
21.9358	22.2233	22.9343	23.0759	21.5376	20.1578	21.9945	0.0678405	0.104239	-1.31236	GSTZ1
23.0694	23.0717	24.1084	23.6967	22.8102	22.4467	22.9374	0.0679003	0.104246	-0.75511	TMX2
27.1864	27.4148	26.2093	26.307	25.4091	26.3964	25.3036	0.0680231	0.104507	-1.07636	PDHX
29.2558	29.2364	29.402	29.5831	29.1687	29.1578	29.1129	0.0680401	0.104473	-0.222842	NUP155
24.9533	25.1631	25.3539	24.9872	25.3851	25.4809	25.296	0.068265	0.104843	0.272976	ARFIP2
28.1742	28.194	28.3965	28.108	28.4072	28.5014	28.3314	0.0685433	0.105245	0.195145	SNRNP40
23.3265	23.41	22.4098	23.2295	23.4669	23.8713	24.2665	0.0686205	0.105312	0.77424	TATDN1
26.5756	26.1809	26.5022	27.1885	27.0508	27.6432	27.1649	0.068677	0.105354	0.674524	TOMM34
25.5583	25.3775	26.0344	25.6188	25.9005	26.0624	26.3673	0.0688271	0.105546	0.462798	IMPA1
25.7141	25.2988	26.6129	26.7992	26.9837	27.1405	27.1503	0.068955	0.105778	0.985272	CNN2
29.8595	29.8232	29.0824	28.6168	28.3889	28.648	28.4889	0.0690572	0.105894	-0.836903	SEC63
25.2344	24.8465	25.318	24.7268	25.2646	25.5637	25.5995	0.0690775	0.105953	0.444504	CAPZA2
23.0142	22.8616	22.4894	23.6529	23.5087	23.6405	24.1739	0.0691623	0.106005	0.769826	TAF9;AK6
23.3619	23.5136	22.3452	22.3695	22.3901	21.5744	20.1461	0.0692299	0.106028	-1.52737	CDKAL1
24.2874	23.954	25.1101	25.2218	24.0995	23.4531	23.602	0.0695386	0.10663	-0.92514	BAG5
28.6399	28.4568	28.7593	28.5697	28.7697	28.8691	28.7437	0.0695998	0.106667	0.18774	HNRNPUL1
25.5486	25.4405	25.5175	25.8394	25.6469	26.3017	26.1664	0.069667	0.106732	0.451836	KIAA1598
29.8484	29.7305	29.9979	29.9584	30.0411	30.2073	30.0084	0.069925	0.10729	0.201828	SNRPA1
23.3177	21.7331	23.2098	24.4787	21.6424	20.7539	22.0613	0.0700805	0.107596	-1.69894	PNKP
25.2516	25.4009	25.7234	25.8792	25.8129	26.622	26.0656	0.0701665	0.107733	0.603063	PPP2R4
23.0687	23.0128	24.8007	23.2398	22.5609	22.3908	22.0739	0.0703045	0.107907	-1.18863	HAGH
26.9412	26.4439	26.8521	26.5109	27.0617	26.9055	27.2437	0.0703101	0.107843	0.383267	DIDO1
21.0697	21.5423	20.6601	20.8393	21.4641	21.4761	21.93	0.0703907	0.107931	0.595549	WRAP53
30.8947	30.8177	31.1925	30.38	31.2084	31.2581	31.404	0.0704168	0.107874	0.468931	RBMX
26.134	26.1969	26.5091	25.0983	25.0719	25.0939	25.2679	0.0704583	0.107864	-0.840016	NDUFB5
23.0996	23.7643	23.366	22.7578	20.1349	22.6972	22.1226	0.0706019	0.108048	-1.59538	NCBP2-AS2
25.2772	25.5925	25.4623	25.4817	25.0525	25.0806	25.3979	0.0706387	0.108095	-0.276405	DPM3
24.3706	25.6496	26.0316	25.9222	26.3918	26.519	26.7329	0.0706977	0.108119	1.05441	ACTR1A
28.4444	28.1092	28.1866	28.2132	28.8558	28.2677	28.9335	0.0707972	0.108335	0.447312	RNMT
24.7902	25.7216	26.177	26.015	24.8069	24.5534	25.0294	0.07081	0.108285	-0.879399	HEL-S-109;NUCB2;Nucb2
27.6268	27.8497	27.9692	28.2154	28.1369	28.2811	28.4552	0.0708632	0.10827	0.375773	EIF3M
27.9196	27.8545	28.0359	28.2125	27.7753	26.2325	24.4389	0.0709261	0.108289	-1.85675	PDIA3
23.8008	24.4778	25.069	24.1977	25.0957	25.2491	25.0132	0.0710412	0.108367	0.732999	TRIP6
29.8591	29.9694	28.7323	30.3836	31.194	30.2626	31.0662	0.0712172	0.10859	1.10483	S100A10
22.2711	23.7196	23.8375	22.5854	22.1298	22.1653	21.6952	0.0714112	0.108937	-1.10663	TYSND1
23.107	22.3912	23.1194	23.9003	23.691	24.0473	24.4219	0.0714948	0.108996	0.923931	USP47
26.0471	26.0994	26.881	26.5265	26.1596	25.533	25.0708	0.0717188	0.109236	-0.800695	GLB1
27.291	27.0087	26.4851	26.5002	26.3746	26.2147	26.2471	0.0717522	0.10925	-0.542432	RPS27L
26.7305	27.3469	27.5809	27.6639	26.633	26.7478	26.8638	0.0718225	0.10937	-0.582353	CFL2
24.7322	24.5053	24.1277	24.0833	23.4608	20.7757	23.5242	0.0718581	0.109369	-1.77524	MTCH1
24.6009	24.6442	25.2448	24.9889	25.107	25.4738	25.4217	0.071867	0.109304	0.464443	PAFAH1B3
22.9536	22.8202	23.8953	22.2487	22.7261	20.5659	19.2497	0.0724084	0.110638	-2.13224	HSCB
26.7609	26.9596	26.0145	26.4548	27.2869	27.5157	26.8429	0.0724987	0.110718	0.667707	POLR2E
22.873	22.7645	23.6343	23.2219	23.0071	21.6888	21.1133	0.0726026	0.110823	-1.18704	C17orf85
26.1578	26.2443	25.1004	24.7102	24.2103	24.8396	24.3437	0.0728126	0.111071	-1.08866	CTAGE5;MIA2
26.7389	26.6986	26.1803	27.2828	27.2676	27.3518	27.3753	0.0730108	0.111386	0.606436	BCAS2
26.7183	26.5929	26.4553	25.6616	25.6932	25.8658	25.5196	0.0732268	0.111817	-0.664136	UQCRQ
22.0777	22.131	22.0134	22.0082	22.1908	22.2679	22.7691	0.0732676	0.111829	0.351692	GNAI1
26.2222	25.9565	26.6455	26.3475	25.6089	26.1536	25.451	0.073369	0.112009	-0.555108	MRPL43
25.5648	24.8274	25.3619	25.1351	25.4383	25.7984	26.111	0.0734013	0.111955	0.560253	TRIP12
25.4756	25.7046	25.9009	25.6638	25.7052	26.5314	26.5412	0.0734879	0.112122	0.57306	ERAP1
27.4847	27.2912	28.0939	27.5538	27.0489	27.2567	27.0882	0.0735829	0.11219	-0.474643	RCL1
27.9743	27.8086	27.6019	27.6891	27.4308	27.3918	27.6701	0.0735933	0.112124	-0.270903	JUP
24.8124	25.0334	24.3446	24.7823	19.6645	21.9016	24.5622	0.0736528	0.112129	-2.70042	ISCU
21.5645	21.9821	20.0908	21.9774	22.8204	22.4721	22.5556	0.0738892	0.112538	1.21233	RNF14
28.409	28.4983	29.2485	28.8912	28.5801	27.4745	27.8254	0.0740351	0.112771	-0.801786	NME1
31.8912	31.6941	31.1251	32.0188	32.3075	32.2236	32.1189	0.0746677	0.113755	0.534398	GNB2L1
25.7466	26.4199	27.222	26.5946	25.6087	25.952	25.2573	0.0746816	0.113688	-0.889789	SCFD1
23.2476	23.1437	23.2654	22.7797	23.8136	23.2676	23.5122	0.0747592	0.113715	0.42204	CPSF4
26.7594	26.3484	25.3426	27.4779	27.918	27.3022	27.9815	0.0748008	0.113677	1.25181	BOLA2
26.9369	26.9802	27.2966	27.6525	27.4807	27.7484	27.9427	0.0748134	0.113611	0.507404	ME1
29.3189	29.1956	28.4769	28.5084	28.229	28.2549	28.3572	0.0748539	0.11367	-0.594586	SEC22B
26.1704	26.4808	26.4634	26.2275	26.4902	26.7789	26.5449	0.0749299	0.113725	0.269148	CPD
27.563	27.6899	26.6004	26.37	26.1016	26.466	25.5512	0.0750319	0.113873	-1.01622	NFS1
24.3436	25.2156	25.3074	24.9016	25.2421	26.1373	25.701	0.0756794	0.115105	0.751439	RRM2
25.3793	25.0968	23.9815	23.1849	22.8868	23.1799	23.1054	0.0756801	0.115038	-1.35322	ADCK3
26.3337	26.2438	26.679	26.1657	25.9761	26.1863	25.8568	0.0757382	0.11502	-0.349141	SPTLC1
22.9515	22.8423	20.8518	22.6253	24.2666	23.4074	23.4796	0.0760214	0.115501	1.40015	RIOK2
26.6667	26.7269	26.8588	26.7102	26.5087	26.6165	26.6726	0.0761223	0.115524	-0.141326	HBS1L
26.5265	26.4257	26.866	26.7868	27.091	27.2026	26.7653	0.076262	0.115608	0.368408	DPYSL2
26.9742	27.0813	27.7383	26.9602	27.6824	27.9509	27.5412	0.0767545	0.11632	0.536286	COASY
25.7811	25.7701	25.5282	25.2436	25.0182	25.4458	24.9729	0.0768885	0.116528	-0.43515	MRPL33
21.0961	18.905	20.1167	22.0672	22.6185	22.4759	21.9873	0.0769013	0.116514	1.81432	CD320
24.1731	24.5016	24.096	26.0409	25.9179	25.74	26.0718	0.0771846	0.117129	1.20697	TUBB6
25.1158	24.5389	24.6866	24.6576	24.939	25.1617	25.2975	0.0776833	0.117792	0.382987	SYNPO
26.8825	26.8126	27.0425	27.0289	26.9484	26.289	26.2873	0.0777365	0.117897	-0.433411	CSTF3
28.848	28.8046	28.3536	29.1794	29.1179	29.3324	29.3269	0.0780436	0.11843	0.462631	IDH1
22.5518	22.8868	23.8367	20.5214	20.07	21.0846	20.4828	0.0782103	0.118624	-1.90338	TMED1
27.4017	27.8617	27.6676	28.3313	28.2115	28.3288	28.5197	0.0785722	0.11916	0.537766	SKP1
27.4921	27.8494	26.6313	26.4336	25.8512	26.6583	25.6258	0.0786326	0.119212	-1.0565	CARS2
23.9925	24.3129	24.3152	24.7186	24.5863	24.8096	24.8611	0.0788452	0.119567	0.417532	CCS
24.9513	24.9394	26.4063	26.1684	24.4078	24.5432	24.7878	0.0790948	0.120055	-1.03673	UQCRH
30.5186	30.3987	29.0875	28.8389	28.391	28.8835	28.321	0.0791164	0.120032	-1.17904	ATAD3A
22.8113	23.0009	22.3746	22.5127	18.2894	21.5996	21.7769	0.0791294	0.119963	-2.11956	METTL15
27.4354	27.5953	28.2444	27.8822	28.4531	28.1022	28.3082	0.0792643	0.120223	0.498505	PSMB2
26.4164	26.2609	26.9706	26.87	26.9413	27.155	27.2082	0.0792937	0.120221	0.47206	ARPC5L
28.7624	28.6743	28.1226	27.9186	27.6606	27.8338	27.9418	0.0793973	0.120315	-0.557431	ATL3
28.3004	28.4082	28.4565	28.4436	27.8741	28.2376	28.306	0.0794463	0.120358	-0.262972	NOMO3;NOMO2;NOMO1
22.5337	23.3724	23.3042	23.0223	24.2538	23.403	23.5789	0.0794915	0.120344	0.687056	NOTCH2;NOTCH1
28.7626	28.3311	29.0563	29.2303	28.257	27.9427	28.5361	0.0796272	0.120488	-0.59983	SRP72
22.2312	22.7228	21.8403	23.0693	22.946	24.3748	23.26	0.0796676	0.120454	1.06103	STK39
26.078	24.7614	25.6416	25.1166	24.9273	24.5693	23.8224	0.0798015	0.120678	-0.959734	AIF1L
24.0689	23.9186	22.0025	22.4913	21.4815	21.8814	21.9207	0.0800666	0.121158	-1.35913	ST3GAL4
21.8323	22.0117	20.3207	20.7953	23.2285	21.6807	22.8991	0.0800876	0.121089	1.36277	NELFA
25.1245	25.4964	25.9943	25.606	25.987	26.3029	25.9134	0.0802536	0.121374	0.512477	GAPVD1
22.6772	22.2367	22.6389	23.355	22.076	21.755	22.3312	0.0804531	0.121531	-0.67288	TOM1
25.037	24.7382	26.6688	25.0274	24.4591	22.6511	24.327	0.0806662	0.121808	-1.55545	INTS3
22.706	23.0519	23.4266	22.8759	22.5286	22.6965	22.5946	0.0807353	0.121828	-0.408519	UBXN6
25.2398	26.2192	24.9878	25.1552	24.5105	24.8946	24.5388	0.0807747	0.121772	-0.752532	MRPL21
26.3596	26.4614	26.5835	26.3542	26.7309	26.537	26.5789	0.0808349	0.121896	0.175937	RBM15
22.7326	22.4382	21.9494	22.0341	21.4425	21.9717	21.8001	0.0808374	0.121827	-0.550456	WUGSC:H_RG122E10.2a;RHBDD2
28.8981	28.6435	28.783	28.7777	29.4284	28.9354	28.9425	0.0810749	0.122327	0.32653	EBNA1BP2
30.9779	31.0989	31.4758	31.5356	31.8476	31.6224	31.5299	0.0811494	0.122289	0.394592	VCP
24.905	25.0174	24.762	24.8623	24.0931	24.7292	24.6616	0.0813134	0.122667	-0.392058	MRPL50
24.9575	25.4215	25.0763	24.7175	22.5133	24.6389	24.2384	0.0814083	0.122673	-1.24634	MRPS18A
26.9358	27.2034	26.673	27.0334	26.5632	26.7659	25.9175	0.0816545	0.123171	-0.545919	LSS
24.5153	24.2444	23.7281	24.7548	23.2377	23.8928	23.7752	0.0816727	0.123151	-0.675402	ZFC3H1
29.5418	29.6532	29.4601	28.2261	28.326	28.4099	28.3458	0.0817439	0.123185	-0.85971	VAPA
25.512	25.3526	24.8687	24.9891	25.489	25.6887	25.569	0.0820933	0.123673	0.401674	KIF22
24.8607	24.7164	24.9596	24.6019	24.1615	24.6505	24.5351	0.0821838	0.123742	-0.335605	ATP2B4
28.4549	28.1279	28.8292	28.7151	28.7323	29.0799	29.2121	0.0824086	0.124181	0.4763	PSMA4
28.0826	27.8552	27.3998	27.8801	27.3331	27.5874	26.7569	0.0825282	0.124238	-0.578656	RMDN3
23.808	23.916	24.2902	23.7849	24.1097	24.3641	24.8212	0.082542	0.124167	0.481933	JUNB
26.6269	26.8914	27.5003	27.3392	27.8764	27.6489	27.4352	0.082649	0.124289	0.56405	KIF5B
26.5517	26.7046	27.1133	27.1928	27.2651	27.281	27.3248	0.0827138	0.124282	0.39971	LSM8
23.2002	22.2762	24.4397	24.1147	24.5144	24.7038	25.218	0.0827379	0.124212	1.30436	DNAJB2;DNAJB6;DNAJB8
28.781	29.0006	28.3283	28.3026	27.889	28.1431	28.3022	0.0827389	0.124142	-0.491699	VDAC3
25.5516	25.8719	26.2843	26.3569	26.3995	26.477	26.6946	0.0827758	0.124126	0.507498	DCTN1
27.3359	27.4369	27.6138	27.5158	26.5642	27.3108	27.206	0.0828164	0.124104	-0.448576	ATAD2
27.5675	26.5952	27.0474	27.9234	27.9035	28.1925	28.0359	0.0830546	0.124464	0.760595	SLK
23.7822	23.8916	23.6815	23.9936	23.2035	23.5299	23.7609	0.083344	0.124912	-0.33913	FAM96A
29.9618	29.4526	29.5521	29.9432	30.3541	30.0198	29.9955	0.0833492	0.124842	0.395703	DDX46
21.4824	21.3343	21.7938	22.0064	21.5458	20.267	18.9897	0.0834828	0.125078	-1.38674	GPHN
21.8022	22.2771	21.8313	21.7035	21.4128	21.7145	21.4915	0.0835287	0.125052	-0.36394	MBOAT7
25.5988	25.3797	24.3469	23.6968	23.5936	23.8055	23.3961	0.0837589	0.125364	-1.15718	ARF6
24.0992	24.2488	25.2561	25.0585	25.3621	25.5609	25.3157	0.0838226	0.12537	0.747253	CRKL
31.3188	31.1541	31.3427	30.9931	31.4484	31.4719	31.3436	0.0838408	0.125374	0.219078	RPL11
23.0481	23.179	24.394	23.7	24.0459	24.8943	24.4851	0.0839468	0.125622	0.894819	SNX5
29.7308	29.6028	30.2433	30.6707	29.6301	29.1561	29.3849	0.0842579	0.12611	-0.671551	SRSF2
24.7891	25.1925	25.5156	24.9531	25.7677	25.4757	25.4277	0.0843441	0.12608	0.444438	MAPK14
25.3286	25.6606	24.8281	25.1764	25.0025	24.6956	24.5379	0.0843685	0.126034	-0.503113	NME3
21.9336	21.8372	20.9493	21.7392	22.5095	21.9971	22.2329	0.0844301	0.126041	0.631671	TDRD3
23.7412	23.2787	22.5069	23.143	23.9314	23.8835	23.6752	0.084447	0.125971	0.662588	GNE
26.8932	27.3735	26.6683	27.3987	26.4533	26.6935	26.6659	0.0844636	0.125914	-0.479191	FLOT2
26.6105	26.3627	26.5032	27.3634	27.1635	27.3608	27.3445	0.0844729	0.125922	0.579659	PRPF31
27.8248	27.9565	27.7292	27.5376	27.7459	26.9813	27.1295	0.0845381	0.126048	-0.476473	SFXN3
30.2022	30.3468	30.1244	30.0329	29.8809	30.1132	29.8782	0.084727	0.126272	-0.219117	MYOF
26.344	26.3488	27.3102	26.4991	25.7999	25.637	26.3405	0.0847377	0.126202	-0.699759	PLA2G4A
26.642	26.7577	25.74	25.8113	24.6345	25.5341	21.2756	0.0847949	0.12625	-2.423	MGST1
25.8068	25.8234	24.7251	26.0275	25.9534	26.6919	26.8016	0.084948	0.126387	0.886556	VTA1
28.0972	27.643	28.0522	27.8983	27.6433	27.7077	27.6262	0.0850442	0.126448	-0.263607	SUGP2
24.3365	24.4352	23.9766	23.4997	24.9943	25.0486	24.2575	0.0851843	0.126736	0.704804	NOL8
25.1029	24.7872	24.5276	25.1064	24.6757	24.2539	24.467	0.0851957	0.12669	-0.415489	ORC2
23.1785	23.022	22.6297	21.8901	22.3343	21.633	21.4545	0.0852037	0.126633	-0.872834	BET1;DKFZp781C0425
22.1856	19.2578	24.9918	23.7251	25.5188	25.7182	25.7766	0.0853256	0.126767	3.13113	PALLD
21.1336	20.8429	20.8765	20.3402	20.6547	20.0969	19.7829	0.0853907	0.126747	-0.620138	PRKACB
29.1664	29.2537	29.914	29.7154	29.9421	29.9004	30.0958	0.0858804	0.12784	0.467084	AARS
24.0629	24.7847	22.5255	23.3361	21.9287	22.7568	22.4525	0.0858977	0.127769	-1.29796	SLC27A4
24.7994	25.1065	23.2614	22.95	22.8191	22.0275	22.8872	0.0859612	0.127772	-1.4514	NARS2
28.2308	27.7521	28.3825	28.325	28.8196	28.341	28.6861	0.0860107	0.127765	0.44296	LIMA1
23.6243	23.6703	24.1909	24.1363	24.9926	23.9702	24.7605	0.0861551	0.127998	0.668958	PRIM1
23.592	23.3162	23.3969	23.7977	23.2135	23.1129	23.3546	0.0862831	0.128261	-0.298652	MIER1
29.8405	29.957	30.4897	30.41	30.4154	30.7565	30.6972	0.0863274	0.128283	0.448708	G6PD
29.0547	29.1297	29.7352	29.5663	29.5116	30.0955	30.2134	0.0864948	0.128553	0.568692	PLS3
29.3673	29.2909	29.1636	28.9004	29.0034	28.4957	28.9071	0.0866714	0.128807	-0.378505	RPL30
30.5634	30.2912	30.9622	30.7726	30.811	31.2433	31.199	0.0867075	0.128797	0.437067	PCBP2
25.4257	25.7534	26.3698	25.881	26.2426	26.7591	26.2903	0.0868782	0.128945	0.573203	UNC45A
25.9677	25.8236	25.8343	25.7813	26.0522	26.0715	25.8784	0.0868928	0.128885	0.148985	DHX37
25.1854	25.4636	24.5277	24.8394	24.2127	24.7354	24.3038	0.0870535	0.129288	-0.586764	MRPL27
28.2718	27.8876	27.876	27.6082	27.6686	27.4286	27.5422	0.0871501	0.129399	-0.36439	CORO1C
25.8326	24.9768	26.0208	25.8205	26.2386	26.3907	26.1536	0.0872694	0.129606	0.598276	GPKOW
25.9856	26.1467	25.1957	25.7874	25.736	24.0087	24.3943	0.0872731	0.129534	-1.06584	BAX
24.3057	22.7811	23.7088	22.7767	24.2794	24.2062	24.5762	0.0877162	0.130317	0.960858	EIF2B5
28.3846	28.5281	28.406	28.8307	28.6713	28.9811	28.8699	0.0877777	0.130469	0.303422	CCAR1
33.5057	33.1834	33.0725	33.8541	33.7874	33.7665	34.0949	0.0878834	0.130569	0.479021	PPIA
20.2989	20.238	22.9231	20.663	22.2267	22.8693	22.9337	0.087962	0.130728	1.64581	ZBTB8OS
20.92	23.8463	23.093	23.1725	24.7717	24.3586	24.043	0.0881277	0.130999	1.63315	MAD2L1
27.0551	27.1074	27.7457	27.1917	27.6221	28.1008	27.586	0.0883761	0.131346	0.494673	UGP2
23.5128	23.3915	24.7564	24.1423	21.8074	23.3888	23.144	0.0886587	0.1318	-1.1707	STAM2
24.0372	24.1355	24.4011	24.6461	24.8876	25.4643	24.4395	0.0887287	0.131877	0.625517	STAMBP
23.1361	23.2371	23.1061	22.5892	23.921	23.1528	23.5795	0.0888483	0.132007	0.533923	SCAF4
24.7222	25.2667	25.329	25.166	25.7876	25.5537	25.294	0.0890082	0.132199	0.424126	TRMT1
21.6584	22.8858	23.2659	22.8757	23.0153	24.2629	24.0513	0.0890144	0.132149	1.10505	CDC34
28.079	28.2546	28.2934	28.9143	27.9418	27.3638	28.0695	0.0892622	0.132494	-0.593603	DDX39B
22.2096	22.6267	21.9166	21.1252	21.3025	21.2101	20.9726	0.0892645	0.132422	-0.807777	GTPBP6
27.5467	27.3342	26.4927	26.2594	26.1618	26.272	25.858	0.0894206	0.132618	-0.810953	RAB8A;RAB8B
27.1346	27.4904	26.5929	27.7577	27.6852	27.9014	28.1549	0.0895608	0.132871	0.66998	SEC13
24.278	24.3356	24.2798	24.8333	24.5395	25.0008	25.1494	0.089586	0.132812	0.464916	PRKCI
26.508	26.5314	25.6025	25.9767	26.8041	26.7284	26.6249	0.0897929	0.133071	0.564512	EHD1
24.025	20.7856	25.2773	24.9909	21.3522	21.856	19.73	0.0902987	0.13406	-2.79036	MLIP
26.3068	26.0025	25.685	24.9253	24.988	25.1864	24.6736	0.0903657	0.134092	-0.78055	YARS2
24.5259	25.2814	25.4725	25.3712	25.7616	26.381	25.4766	0.0905014	0.134182	0.710293	PPP6C
24.1604	23.6221	24.8951	24.7576	23.7657	23.4833	23.6106	0.0906022	0.134296	-0.738897	FAM207A
28.3541	28.2532	28.5835	28.4617	28.6987	28.5374	28.5869	0.0906265	0.134271	0.194543	RCC1
20.9569	22.9775	23.2027	21.9536	23.3951	23.5567	23.7284	0.090839	0.134607	1.28737	NDC80
30.34	30.3615	30.5814	30.5353	30.8255	30.4829	31.1162	0.0908571	0.134566	0.353675	RPS7
25.5503	25.6092	23.9546	23.7478	23.3033	23.4757	23.6205	0.0909252	0.134617	-1.24896	ECSIT
26.547	26.3353	26.999	26.9181	27.0728	27.1891	27.025	0.0909895	0.134615	0.395774	CBR1
18.834	18.6728	21.342	20.556	18.5742	18.2115	17.7586	0.0910211	0.134607	-1.66974	PEO1
26.019	25.9594	26.2857	25.8456	26.2955	26.1654	26.3969	0.0910818	0.134686	0.258543	PARN
26.9604	27.6004	26.2511	25.9464	26.342	25.1488	25.1063	0.0910839	0.134613	-1.1572	TMEM109
26.6207	26.6966	27.4088	26.9184	27.5416	27.4721	27.1669	0.0911554	0.134792	0.482387	GRB2
23.3926	24.8718	23.6285	22.5971	23.4596	20.8017	20.789	0.0912198	0.134874	-1.93904	GFM2
21.2814	22.9798	23.0798	22.1078	21.4738	21.3526	21.0808	0.0912365	0.134802	-1.0598	NME6
21.4558	22.2711	21.8072	22.3732	22.6621	22.3301	22.604	0.0912627	0.134778	0.555247	MVD
26.3789	26.1007	25.562	24.7691	23.8302	25.4155	24.2478	0.0912786	0.134727	-1.20486	GCDH
29.2991	29.4586	29.4541	29.4671	29.466	29.5719	29.7559	0.0913316	0.134752	0.178213	ERP29
27.3503	27.0837	25.7887	26.8773	25.5043	26.2118	25.8552	0.0913814	0.134731	-0.917883	MRRF
20.6646	20.3144	22.6762	22.241	22.5439	23.3233	23.003	0.0916392	0.135234	1.48272	ZPR1
24.058	24.2593	24.1059	23.614	24.4074	24.3897	24.2773	0.0916858	0.135209	0.348861	GOSR2
23.002	23.3519	19.1838	20.972	24.0138	23.8495	24.2029	0.0917	0.135183	2.39462	DST
29.2273	28.8572	28.6039	28.0843	28.0122	28.2226	28.0384	0.091888	0.135477	-0.602084	TOMM40
19.8218	20.2973	21.8442	21.5599	21.696	22.6052	22.1956	0.0918982	0.135421	1.28482	TBL1X;TBL1Y
26.879	27.2019	26.8298	25.6438	26.3575	25.2832	24.643	0.091986	0.135488	-1.21072	TMX3
27.9528	27.0232	28.6969	27.729	28.7513	28.7014	28.6491	0.0920065	0.135415	0.850159	EIF1AX;EIF1AY
25.9125	26.1697	26.4244	26.5599	25.9594	25.8604	25.9134	0.0921532	0.135598	-0.355523	NUP54
27.2442	27.4888	27.7181	27.7017	26.7361	27.3722	27.2147	0.0921623	0.135532	-0.43052	TIMM9
22.0276	21.8909	21.8682	21.6133	22.0663	22.0033	22.1611	0.0922922	0.135798	0.226888	LRRC57
24.9724	24.9738	24.8213	24.7845	24.9079	25.1646	25.3332	0.092364	0.135865	0.247232	EPB41
26.9954	27.0948	27.1696	27.2177	27.2995	27.2066	27.2365	0.0925206	0.135927	0.128159	NUP188
26.1542	25.8147	25.631	26.144	25.2161	25.4012	25.84	0.0927946	0.136444	-0.450195	YTHDC2
24.9164	24.9623	25.5508	25.145	25.437	25.73	25.4404	0.0929089	0.13654	0.392216	UBA6
28.8079	29.0315	29.2693	29.3654	28.89	28.6267	28.8299	0.0930032	0.13664	-0.336318	SSR4
23.2613	23.3074	22.8224	22.9247	22.705	22.9053	22.1384	0.0930464	0.136629	-0.496062	ASAH1
25.8182	24.8878	25.3266	25.7892	26.2275	26.0121	25.842	0.0937202	0.137897	0.571775	DHX16
29.402	29.4262	28.4311	28.3765	28.0468	28.3529	28.1364	0.0938661	0.138027	-0.730222	CYB5R3
24.391	24.6304	25.5565	24.6733	24.518	23.7344	23.9579	0.0939252	0.138062	-0.742704	SCAMP1
22.3025	21.6816	21.5308	21.487	21.3148	20.9529	21.4197	0.0939929	0.138155	-0.521367	CTNNA2
27.1592	27.7422	26.4124	26.981	25.6405	26.6488	26.3896	0.094266	0.138576	-0.8474	ARL6IP5
23.8754	21.9372	23.0739	24.2914	24.8433	24.2789	24.6473	0.0943283	0.13863	1.29535	UBFD1
27.1981	27.2199	26.316	26.208	25.9	26.3841	25.582	0.0944249	0.138755	-0.780128	MRPS2
25.1682	25.2685	24.8993	24.5565	25.2184	25.4942	25.4525	0.0945393	0.138779	0.415227	TRAPPC3
20.8914	24.6915	23.7769	22.5775	25.2954	24.7297	24.9855	0.094637	0.138854	2.01922	EMC4
23.5753	23.2795	23.5331	23.6902	22.9465	23.2799	23.3953	0.095496	0.140447	-0.312288	SEC24D
26.2867	26.419	26.5694	26.2951	26.4226	26.7575	26.7323	0.0955393	0.140455	0.244923	MED27
20.7987	21.6763	22.8959	21.3278	20.0703	20.5419	20.9283	0.0955571	0.140413	-1.16121	SUN2
26.9064	26.6475	27.6036	27.2456	27.4065	27.7251	27.8032	0.0959557	0.141303	0.544159	PSMD12
30.7943	31.0839	31.6725	31.8177	31.7626	32.3467	31.8949	0.0960641	0.141379	0.659335	TXN
23.7435	23.028	23.3931	22.8726	23.7464	23.756	23.6936	0.0961749	0.141522	0.47271	C12orf43
22.7062	22.1663	22.4713	23.4565	22.1029	21.8549	22.1013	0.096437	0.141869	-0.680388	PPP2R5C
23.3624	23.3365	22.6492	23.3598	23.7432	24.0335	23.3683	0.0964603	0.141813	0.538018	EIF1AD
27.5936	27.8199	27.6144	27.6836	27.5536	27.0878	27.531	0.0965663	0.141921	-0.28705	TARDBP
29.4073	29.3099	29.4707	29.7641	30.3131	29.5431	29.9503	0.0965726	0.141845	0.447532	NOLC1
29.3031	28.4291	28.126	28.4752	28.0105	28.072	27.7877	0.096659	0.141918	-0.626641	ARF4
25.0251	24.8451	24.3772	24.014	24.0166	24.1299	23.8339	0.0968762	0.142281	-0.571867	CNPY3
24.7109	24.4554	25.0558	24.5627	24.9969	24.9216	25.2268	0.0970947	0.14265	0.352211	RAB11FIP1
27.6393	27.4505	25.9737	26.8056	25.9124	26.3251	25.8346	0.0972066	0.142715	-0.943277	MRPL44
23.8709	23.4182	20.1038	22.2566	20.7432	20.1322	20.1995	0.0972614	0.142719	-2.05406	DOLPP1
22.8908	23.6391	24.0914	20.192	24.3316	25.4099	24.8733	0.0974223	0.143031	2.16829	TXNDC9
28.322	28.5224	29.2537	28.9038	29.3609	29.2717	29.144	0.0977509	0.143616	0.508425	PGD
30.5752	30.6323	31.3516	31.2113	31.328	31.5063	31.4472	0.0978278	0.14377	0.484534	HSPB1
24.7693	25.0441	25.3611	25.139	25.2024	23.3668	23.5841	0.0979344	0.143884	-1.02732	EHBP1L1
25.7767	25.2331	25.5617	25.1836	23.8798	25.4723	22.5708	0.0980739	0.144141	-1.46447	IMMT
27.6557	27.5254	27.4447	27.7349	26.9419	27.5385	27.2917	0.0980871	0.144088	-0.332796	APOO
26.3913	26.5484	27.3504	27.3989	27.4627	27.5562	27.6689	0.0982146	0.144255	0.640341	SUGT1
22.6802	22.557	24.7041	24.4665	24.8799	24.979	25.0623	0.0983134	0.14444	1.37177	SH3GLB2
27.9739	27.9098	28.0036	28.2227	27.7629	27.8849	27.8987	0.0985345	0.144822	-0.178614	EPB41L2
21.888	21.7215	19.6427	21.6017	22.6783	22.2357	22.5763	0.098601	0.144872	1.28328	BUD13
24.0785	20.45	21.4643	24.9901	25.192	25.6239	25.1492	0.0986762	0.144994	2.57598	SEPT6
27.4656	27.0884	26.6443	26.6078	26.1431	26.7052	26.3205	0.0988569	0.145243	-0.561939	RAB21
25.3456	25.5495	25.4765	24.5151	24.5585	24.7209	24.6522	0.0991878	0.145759	-0.57781	PIGT
24.0629	23.447	19.9069	23.0556	25.1147	24.4056	25.0877	0.0992888	0.14589	2.25122	WBSCR22
22.8413	22.7167	22.16	21.0451	20.6866	21.856	20.0623	0.0993021	0.145813	-1.32241	POLG
26.2219	26.6303	25.7983	25.791	24.9892	25.6816	25.7604	0.0993201	0.145737	-0.63334	ARL1
20.7188	21.0893	20.3824	21.4438	21.9466	21.4622	21.2578	0.0998085	0.146578	0.646993	TJP2
22.6262	22.3014	24.0334	24.5454	24.3735	24.9273	24.7944	0.0998494	0.146558	1.32181	CUTC
31.3864	31.255	31.6998	31.5796	31.7159	31.7481	31.69	0.0999208	0.146621	0.237809	XRCC5
24.6128	24.6231	23.3269	23.7373	23.6271	22.8892	23.1422	0.0999571	0.146603	-0.85553	TMUB1
26.5901	26.5088	24.9512	25.8474	24.7558	25.3377	24.9842	0.100043	0.146677	-0.948451	NDUFAB1
26.2319	26.3518	27.1562	26.9224	26.0059	26.0217	26.306	0.10029	0.146985	-0.554392	CIRH1A
20.6331	20.9036	22.0831	21.2743	20.1741	20.3902	20.7178	0.100411	0.147301	-0.796129	KLHL11
22.9623	22.965	23.078	22.221	22.5468	22.2441	21.3975	0.10088	0.148096	-0.743751	ABCC5
22.4416	23.15	23.9816	23.6521	23.6094	25.0386	24.4414	0.101121	0.148434	1.05681	UBE2R2
27.7598	27.9343	28.2685	28.1661	28.1767	28.3619	28.8563	0.102917	0.151385	0.432794	CLTA
26.0112	25.8277	25.6705	25.0467	24.5909	25.2503	25.2389	0.103127	0.151548	-0.612349	TM9SF1
24.6401	23.8872	24.6814	23.8095	25.1228	24.5898	24.8798	0.103559	0.1522	0.609633	EXOSC1
25.7484	26.1048	25.4617	23.9493	24.1049	24.1691	24.3157	0.10369	0.152312	-1.11948	NDC1
29.9208	29.9091	29.916	30.4899	30.3841	30.4297	30.379	0.10379	0.152406	0.338642	PTGES3
20.1368	20.0148	21.0179	20.351	19.9219	19.5691	19.9579	0.104089	0.152854	-0.563883	ICE1
23.5116	23.5655	23.6521	23.8526	23.5897	23.1788	23.3765	0.104228	0.153047	-0.263777	PIK3C3
27.0595	27.1726	27.4576	27.3581	27.3795	27.8952	27.5077	0.104267	0.153063	0.332171	ACACA
27.035	27.3498	27.338	26.5423	26.383	26.7491	26.6321	0.104486	0.153358	-0.478178	ACSL4
26.6342	25.1141	26.4103	26.5056	25.1781	25.7332	23.7934	0.10462	0.153413	-1.26447	UFM1
25.2851	24.2351	25.7992	25.8323	26.4645	25.7175	26.6638	0.104799	0.153619	0.994016	MTAP
27.327	27.4287	26.7049	25.842	25.8064	25.0675	19.6612	0.105123	0.154041	-3.31394	DAD1
24.6199	24.7359	23.3819	25.2318	25.6324	25.2874	25.3623	0.105265	0.154115	0.934994	TSNAX;DISC1
25.3067	25.1727	25.6955	25.7867	24.6361	20.6296	24.5674	0.105579	0.154408	-2.21271	NDUFB4
24.1222	24.0799	23.9106	23.8402	24.113	24.1812	24.6959	0.105583	0.154328	0.341815	ADARB1
29.2176	29.2915	28.6873	29.6056	28.7981	28.6829	28.7745	0.105586	0.154248	-0.448657	FKBP10
35.6036	35.3643	35.5682	35.3293	35.0751	34.8107	35.4604	0.105867	0.154758	-0.350929	HIST2H2BE;HIST1H2BB;HIST1H2BO;HIST1H2BJ;HIST3H2BB
24.7991	25.154	24.4606	24.2916	23.3705	24.3842	24.2238	0.105896	0.15474	-0.6835	MEST
28.6649	28.8679	29.1886	29.293	29.2669	29.3891	29.3859	0.105908	0.15467	0.343685	FAU
29.1669	29.116	28.5768	28.2436	28.3511	28.275	28.1117	0.106204	0.155059	-0.529885	MTHFD2
23.6461	23.7991	23.0114	23.402	23.5743	24.4638	24.1076	0.106275	0.155125	0.583898	SPATA5L1
25.8611	25.6965	26.1035	26.7734	27.0242	26.3739	26.8366	0.106369	0.155097	0.636292	NPLOC4
27.7742	28.0486	28.65	28.5212	28.66	28.8235	28.7025	0.107402	0.156845	0.480166	LTA4H
28.3961	28.6495	29.053	29.037	29.2322	29.2234	29.044	0.107618	0.157322	0.382615	PSME1
23.5805	23.6634	22.7245	20.9575	23.7794	24.2321	24.7684	0.107649	0.157276	1.52848	TRAPPC5
24.5997	24.2767	22.1635	23.8413	20.9447	22.4783	22.9469	0.107863	0.157613	-1.59699	HSD17B11
22.9342	22.8228	23.5608	23.8399	22.66	22.4605	22.9241	0.107985	0.157795	-0.607883	PTPRK
21.5122	21.4634	23.5698	20.6661	20.5546	20.3615	20.1549	0.108129	0.158012	-1.44588	TRMT1L
31.8917	31.4886	31.3072	31.6854	31.855	31.8689	31.9379	0.108222	0.158147	0.294057	PABPC1;PABPC3
28.0936	27.7055	25.7563	26.2379	25.0651	25.9069	25.765	0.108358	0.158331	-1.36932	ATP5J2-PTCD1;PTCD1
21.1615	19.9086	20.749	21.3648	21.9345	21.3711	21.4714	0.108476	0.158496	0.796369	C2CD5
27.0131	26.4781	26.4442	27.6962	28.0872	27.6946	27.2753	0.108493	0.158439	0.777804	DBI
26.9313	26.8005	26.6065	27.1698	27.5699	27.0267	27.1736	0.108894	0.159116	0.379733	CLTB
27.3107	27.5813	27.7552	27.7932	27.8698	27.8089	27.9309	0.108936	0.159158	0.259827	DBN1
29.741	29.9713	29.9002	30.0079	29.8452	29.7239	29.6577	0.109087	0.159408	-0.162853	NUP93
30.2173	30.7471	31.7112	32.189	30.3583	29.4902	30.3899	0.109503	0.160149	-1.13672	TUBB
26.877	26.4388	26.5386	26.8647	26.7786	27.1688	27.0495	0.109508	0.160068	0.319184	EXOSC2
25.6653	25.9494	26.0149	25.7553	25.5834	25.6964	25.6719	0.110047	0.16083	-0.195662	GRHPR
24.3301	22.8506	21.1462	23.8119	25.3126	24.2621	24.5686	0.110926	0.162379	1.67976	POLR1E
22.8162	23.0327	22.7339	22.6563	22.7872	20.0233	21.6811	0.110958	0.162368	-1.31257	PTPRJ
26.2557	26.6033	26.5925	26.9146	25.9413	26.3414	26.3568	0.11105	0.162528	-0.378327	TIMM8A
25.8235	26.5249	25.3804	24.8721	25.0676	24.0364	24.9645	0.111132	0.162624	-0.960748	SEC62
23.5207	23.5277	22.5838	22.9846	22.1336	22.8659	22.5871	0.111685	0.163561	-0.625325	MGST3
27.9583	27.3656	27.9708	28.053	28.0735	28.2182	28.391	0.111836	0.163798	0.390644	CAPZA1
21.7534	22.5332	21.9342	22.2599	22.7091	23.8561	22.3195	0.112026	0.163971	0.841403	KLC2
23.9904	21.5833	22.1121	24.6066	22.0971	20.2171	21.2841	0.112098	0.164018	-1.87367	TOMM7
24.5792	24.4609	24.9217	24.342	24.5687	25.2657	25.6985	0.11219	0.16409	0.60169	UMPS
22.0615	22.2357	24.7384	24.4043	24.6613	24.9387	25.3991	0.112191	0.164006	1.63973	FIBP
25.4742	25.6905	26.0337	25.7008	26.1716	25.9584	25.9195	0.112199	0.163923	0.291743	DNAAF5
23.4176	23.0467	22.3836	21.0455	21.3697	19.5839	21.6989	0.112583	0.164506	-1.58918	NRM
23.9993	23.6233	24.531	23.9559	23.2213	20.7846	23.6177	0.112778	0.164841	-1.48617	BUD31
26.4863	26.4627	26.7117	27.1782	26.9424	27.183	27.2053	0.112921	0.165031	0.400465	DDT;DDTL
26.5771	26.4763	26.913	27.0146	26.6839	27.7882	27.6635	0.112968	0.165076	0.633277	SRM
22.6804	21.2621	23.8649	22.6138	23.4917	23.8087	24.3244	0.112984	0.164992	1.26964	NRBP1
26.3225	26.0291	26.7225	26.0725	26.1422	24.9936	25.7678	0.113048	0.165103	-0.652106	LIG3
25.1756	26.07	24.5295	25.2816	25.9284	26.2052	25.867	0.113217	0.165475	0.736022	PREPL
25.2735	25.0385	25.5836	24.2783	24.4931	24.5882	23.8493	0.113277	0.165517	-0.733278	MRPS26
26.5902	26.5664	23.1438	24.9495	23.7021	23.8526	22.375	0.113489	0.16585	-2.00259	MPC2
20.9222	21.3103	21.7833	22.1674	21.4929	20.2316	20.067	0.113698	0.166086	-0.948657	TRIM32
23.647	23.5532	22.8734	20.3031	20.0574	21.2561	20.8874	0.113964	0.166502	-1.86057	SGPP1
23.262	22.9894	23.7339	23.3894	23.6633	23.7223	23.6973	0.1141	0.16663	0.350662	COPS7B
24.9489	25.1784	24.8477	25.2686	25.2146	25.2794	25.404	0.114262	0.166709	0.238434	PROSC
25.3046	25.5384	25.4414	25.4626	25.5992	25.7471	25.4697	0.114929	0.167661	0.168584	PPIC
26.3772	25.806	25.9876	26.0754	26.0298	25.5325	25.0656	0.115007	0.167748	-0.518953	RIF1
21.7406	21.5258	23.3822	22.8909	21.0445	21.5825	21.4079	0.115124	0.167962	-1.03993	THADA
32.8363	32.9454	32.8576	32.9615	32.7175	32.8265	32.8611	0.115257	0.168077	-0.098492	HSP90B1
25.4383	25.3761	25.149	26.7358	24.989	21.2393	24.6082	0.115353	0.168161	-2.06267	RGPD3;RGPD4;RGPD1;RGPD2
25.4828	25.5349	24.6643	27.062	24.5701	24.0408	24.8751	0.115512	0.168622	-1.19067	TMEM126A
23.6402	23.3452	22.587	21.7242	20.8524	22.1196	22.0185	0.115726	0.168966	-1.16064	FASTKD5
22.5195	22.5577	21.9527	21.7695	24.0902	22.6593	22.5598	0.116295	0.169861	0.903218	NCAPG2
22.7152	23.0524	22.566	22.3505	22.9904	22.8779	23.331	0.116317	0.169788	0.395432	TAF2
22.5417	22.7877	23.2498	22.558	23.1377	23.1213	23.2118	0.116574	0.170173	0.372677	ATG7
24.8731	24.2085	25.0834	25.2324	25.3712	25.417	25.2901	0.116604	0.170087	0.510072	PIN1
24.011	23.4127	22.0887	22.4162	19.5324	22.9412	20.9018	0.116877	0.170446	-1.85705	UQCC1
26.1353	25.6624	26.2044	25.9771	26.285	26.2739	26.2383	0.116975	0.170637	0.270923	RBM27
20.9473	22.0466	22.5466	22.0702	22.836	22.5433	22.6396	0.117042	0.17065	0.770305	RANGRF
24.7771	24.6787	25.6921	25.3885	25.6016	26.0209	25.5578	0.117168	0.170657	0.592636	DCTPP1
24.8034	25.1696	23.7722	25.1526	23.4633	24.1363	24.1295	0.117394	0.17098	-0.814781	NDUFB1
21.4985	22.2028	22.3585	22.026	22.0479	23.4668	22.8691	0.117411	0.170894	0.773133	CDK5
27.5374	27.3908	27.8776	27.9009	27.9448	28.0712	27.897	0.117456	0.170903	0.294298	PRMT5
24.1995	24.3319	24.2921	25.06	25.0798	24.732	25.0239	0.117848	0.171392	0.474344	COPS5
[truncated: 2,142 more rows]
