# Supplementary material for: Multi-omics profiling identifies a deregulated FUS-MAP1B axis in ALS/FTD–associated UBQLN2 mutants
Source: Life Sci Alliance. 2022 Jul 1;5(11):e202101327. doi: 10.26508/lsa.202101327 (PMC9258132; doi:10.26508/lsa.202101327)
Supplement: Supplementary file 4 [file LSA-2021-01327_TableS4.xlsx]

## Sheet: p497s_vs_hela
Gene	baseMean	log2FoldChange	lfcSE	pvalue	q-value	regulation
SCN1A	542.16	5.48877	0.191624	1.93e-180	3.99e-176	up
COL1A2	447.131	4.8489	0.178597	2.53e-162	2.61e-158	up
CGA	1713.37	3.44061	0.12974	5.82e-155	4e-151	up
COL3A1	20318.5	3.48858	0.133724	5e-150	2.58e-146	up
CPA4	5140.17	-2.70597	0.110112	2.36e-133	9.74e-130	down
LAMA4	1020.83	3.21841	0.137824	1.33e-120	4.57e-117	up
LOC100507003	446.947	3.9202	0.17451	9.32e-112	2.75e-108	up
SERPINB5	512.214	3.10363	0.13896	1.7e-110	4.39e-107	up
LUM	1553.58	6.15325	0.286409	2.19e-102	5.02e-99	up
NELL2	766.38	-8.44958	0.401409	2.3e-98	4.74e-95	down
GPRIN3	266.125	4.11701	0.19613	7.89e-98	1.48e-94	up
PAPPA	362.644	3.74234	0.183875	4.4e-92	7.57e-89	up
LOC100507412	940.289	-2.05734	0.105121	2.73e-85	4.33e-82	down
RGS16	1860.42	1.60485	0.0822397	8.3e-85	1.22e-81	up
S100A2	10800	-2.28143	0.116967	9.98e-85	1.37e-81	down
GPR110	211.657	4.6786	0.240502	2.72e-84	3.51e-81	up
UNC13A	463.264	3.33255	0.179423	5.25e-77	6.37e-74	up
LGR5	249.433	2.99159	0.161945	3.42e-76	3.92e-73	up
AMPD3	260.26	-2.3706	0.13076	1.87e-73	2.03e-70	down
MMP2	2494.91	1.40511	0.0781432	2.73e-72	2.82e-69	up
MAPK4	225.023	3.96311	0.224232	6.63e-70	6.52e-67	up
WNT5A	1693.38	1.94504	0.111908	1.16e-67	1.04e-64	up
PCDHAC2	135.968	4.2583	0.245003	1.16e-67	1.04e-64	up
SEMA3A	3039.73	2.12102	0.122477	3.46e-67	2.97e-64	up
MAL2	1538.78	3.01348	0.18041	1.24e-62	1.02e-59	up
MCOLN3	433.642	2.29874	0.141495	2.38e-59	1.89e-56	up
SCN9A	344.715	2.38118	0.146891	4.25e-59	3.25e-56	up
KLF10	2796.7	1.48691	0.0924821	3.65e-58	2.69e-55	up
IAH1	112.555	-4.32949	0.271095	2.06e-57	1.46e-54	down
SERTAD4	110.328	3.61838	0.228906	2.77e-56	1.91e-53	up
AK026379	165.118	3.87186	0.245784	6.54e-56	4.35e-53	up
OSMR	2568.54	-1.33897	0.0852517	1.37e-55	8.87e-53	down
FLRT3	580.307	2.54563	0.16531	1.66e-53	1.04e-50	up
AK056105	118.598	-5.51432	0.361909	2.02e-52	1.22e-49	down
FREM2	104.666	3.98766	0.265637	6.16e-51	3.63e-48	up
SH3GL2	713.271	2.03783	0.136394	1.79e-50	1.02e-47	up
FBN2	3099.93	-2.84488	0.190634	2.33e-50	1.3e-47	down
APOL2	1920.49	-1.18528	0.0796509	4.38e-50	2.38e-47	down
ITPR1	6044.56	2.0336	0.136767	5.24e-50	2.77e-47	up
ZNF608	266.302	3.11601	0.21329	2.45e-48	1.27e-45	up
JAKMIP2	143.072	-6.48743	0.444162	2.57e-48	1.29e-45	down
BASP1	13627.5	-1.19227	0.0820313	7.34e-48	3.61e-45	down
MYD88	570.033	-1.45857	0.101308	5.37e-47	2.58e-44	down
CDK15	98.0689	4.08769	0.285967	2.38e-46	1.11e-43	up
CDH15	171.729	5.9878	0.428548	2.3e-44	1.05e-41	up
LOC375295	404.474	1.39919	0.100322	3.28e-44	1.47e-41	up
GPR141	128.021	5.84246	0.420388	6.54e-44	2.87e-41	up
ZDHHC11	1233.96	-2.90382	0.209095	7.54e-44	3.24e-41	down
PRDM1	134.824	3.65825	0.263733	9.49e-44	4e-41	up
RUNX2	195.287	2.01988	0.145647	9.85e-44	4.07e-41	up
AK096932	285.92	-1.81577	0.132439	8.82e-43	3.53e-40	down
SOX4	1412.84	1.16659	0.0850962	8.96e-43	3.53e-40	up
FMN1	206.614	2.24409	0.163704	9.07e-43	3.53e-40	up
DDR2	814.272	1.99207	0.14606	2.36e-42	9e-40	up
HMCN1	1730.6	3.4807	0.25742	1.17e-41	4.38e-39	up
IGFN1	708.325	-3.89383	0.289975	4.14e-41	1.52e-38	down
MAGI1	550.438	1.67157	0.124738	5.99e-41	2.17e-38	up
CTGF	2497.85	3.04019	0.227306	8.48e-41	3.02e-38	up
TIRAP	187.693	-2.59493	0.194212	1.02e-40	3.56e-38	down
FOLR1	854.406	1.96783	0.147929	2.24e-40	7.69e-38	up
LOC284751	552.984	1.45052	0.10933	3.58e-40	1.21e-37	up
PTPN13	2665.42	1.32054	0.0996754	4.61e-40	1.53e-37	up
KRT10	4394.8	-1.27987	0.0968175	6.78e-40	2.22e-37	down
ANGPTL2	96.0106	3.24287	0.246292	1.36e-39	4.39e-37	up
ASZ1	71.5086	4.0409	0.307331	1.74e-39	5.52e-37	up
ZNF675	355.728	1.73735	0.132249	2.02e-39	6.32e-37	up
MYT1L	175.961	2.2765	0.173405	2.27e-39	6.99e-37	up
SLC35F3	155.808	-2.18696	0.166763	2.73e-39	8.29e-37	down
F10	287.063	2.90948	0.224025	1.44e-38	4.32e-36	up
ACACB	1390.74	1.43671	0.110863	2.08e-38	6.13e-36	up
FOXA1	242.674	1.77135	0.136743	2.23e-38	6.49e-36	up
IFI16	583.634	-2.28379	0.176877	3.87e-38	1.11e-35	down
PLXDC2	129.531	2.6421	0.205438	7.48e-38	2.11e-35	up
SULT1E1	98.5972	2.63243	0.205322	1.25e-37	3.49e-35	up
DCN	89.4368	5.74749	0.448499	1.35e-37	3.72e-35	up
SP140L	282.968	-1.57183	0.123214	2.85e-37	7.74e-35	down
SVEP1	2312.53	1.8609	0.146128	3.79e-37	1.02e-34	up
MBNL3	85.7222	-4.10603	0.322472	3.88e-37	1.03e-34	down
FN1	2546.2	1.68936	0.133076	6.33e-37	1.65e-34	up
VDAC1	26270.8	-0.9769	0.0771141	8.87e-37	2.29e-34	down
LRIG1	879.096	1.94367	0.153692	1.17e-36	2.98e-34	up
KCNJ2	84.867	3.92017	0.311339	2.36e-36	5.93e-34	up
CPED1	478.071	2.32994	0.185262	2.85e-36	7.07e-34	up
PKI55	322.97	-2.1884	0.174331	3.82e-36	9.39e-34	down
FRY	144.903	2.26168	0.181494	1.21e-35	2.94e-33	up
GGT7	82.5951	5.6288	0.455642	4.66e-35	1.12e-32	up
TRIM2	637.509	1.52769	0.124439	1.21e-34	2.87e-32	up
CYP1B1	3096.44	1.39201	0.113482	1.37e-34	3.22e-32	up
DNAH5	95.656	-2.68239	0.219219	1.99e-34	4.62e-32	down
S100P	65.9572	3.5224	0.289391	4.39e-34	1.01e-31	up
NDST4	258.749	1.82306	0.150523	9.18e-34	2.08e-31	up
PAPD7	3383.75	-0.846317	0.0700675	1.37e-33	3.07e-31	down
THRB	308.246	2.46287	0.204097	1.57e-33	3.49e-31	up
GU228584	1161.72	-1.27131	0.105504	1.94e-33	4.27e-31	down
CCBE1	143.021	2.15706	0.179183	2.24e-33	4.86e-31	up
COA4	3559.47	-0.991755	0.0824744	2.63e-33	5.64e-31	down
PODNL1	80.237	4.12751	0.343349	2.75e-33	5.84e-31	up
COL14A1	125.934	3.89497	0.325464	5.26e-33	1.11e-30	up
PRTFDC1	2214.42	1.12793	0.0942671	5.4e-33	1.13e-30	up
PDE4B	687.146	1.24613	0.104226	6.03e-33	1.25e-30	up
MRPL36	2662.46	-1.19052	0.0997204	7.45e-33	1.52e-30	down
LOC100505738	392.71	-1.50866	0.127024	1.56e-32	3.15e-30	down
RASSF5	243.26	1.71832	0.144741	1.66e-32	3.33e-30	up
TRABD2A	1952.88	1.13831	0.0959279	1.77e-32	3.51e-30	up
S100B	64.1759	4.44903	0.375585	2.27e-32	4.46e-30	up
WNT7B	129.941	-2.38474	0.20136	2.33e-32	4.55e-30	down
DROSHA	8628.15	-0.894903	0.0756876	2.95e-32	5.68e-30	down
NHSL2	74.9402	3.16049	0.26853	5.6e-32	1.07e-29	up
DUSP1	1050.96	2.09217	0.177947	6.48e-32	1.23e-29	up
MAP1B	1135.98	1.79751	0.153177	8.44e-32	1.58e-29	up
TMTC2	574.423	1.80432	0.15402	1.07e-31	1.99e-29	up
MYPN	3649.53	-2.95448	0.252761	1.45e-31	2.66e-29	down
GNB2L1	83425.7	-0.853558	0.0730239	1.46e-31	2.66e-29	down
CD248	107.391	6.91399	0.592992	2.05e-31	3.72e-29	up
ASTN1	179.962	-8.53522	0.732099	2.08e-31	3.72e-29	down
KCNT2	57.9842	4.99853	0.430153	3.25e-31	5.78e-29	up
MCF2	115.267	1.95635	0.168942	5.2e-31	9.18e-29	up
NRCAM	824.208	1.58427	0.137143	7.21e-31	1.26e-28	up
IGFBP5	128.83	2.48585	0.215862	1.1e-30	1.9e-28	up
CARD6	89.918	-2.7874	0.242262	1.23e-30	2.12e-28	down
EBF1	258.538	1.41248	0.12277	1.24e-30	2.12e-28	up
LRIG3	1473.15	0.845111	0.0736043	1.63e-30	2.75e-28	up
RYBP	927.452	1.54298	0.134586	1.98e-30	3.33e-28	up
REEP5	7219.33	-0.705689	0.061661	2.5e-30	4.16e-28	down
TGFBR3	646.74	1.27561	0.111676	3.23e-30	5.34e-28	up
ARHGAP21	5337.19	1.14107	0.100127	4.37e-30	7.16e-28	up
CAMK4	60.1867	-3.91586	0.344086	5.23e-30	8.5e-28	down
CCT5	52567.6	-1.17634	0.103371	5.27e-30	8.5e-28	down
NAV1	2773.67	0.855699	0.0755023	8.96e-30	1.43e-27	up
SIL1	1235.74	-1.1987	0.105907	1.06e-29	1.69e-27	down
SLIT2	321.688	1.50375	0.132892	1.1e-29	1.72e-27	up
HDAC9	139.696	3.48395	0.307899	1.1e-29	1.72e-27	up
LYPD1	560.522	-3.49275	0.309726	1.71e-29	2.65e-27	down
CLU	56579.9	-1.22124	0.109885	1.07e-28	1.65e-26	down
LSM2	2173.09	-0.855237	0.0771113	1.39e-28	2.12e-26	down
RAF1	7065.54	0.733642	0.066171	1.45e-28	2.2e-26	up
ADD3	3789.21	1.8154	0.163892	1.63e-28	2.45e-26	up
PDE8B	1434.71	1.13562	0.102572	1.72e-28	2.58e-26	up
ABCA8	47.5261	-4.37502	0.395403	1.86e-28	2.76e-26	down
RPL10	66658.3	-0.879658	0.0795414	1.98e-28	2.92e-26	down
BICC1	582.85	1.31864	0.11975	3.36e-28	4.92e-26	up
ZNF521	103.853	2.47697	0.226005	5.96e-28	8.66e-26	up
CMTM1	268.626	1.61571	0.14745	6.11e-28	8.81e-26	up
FKBPL	570.056	-1.03545	0.0946722	7.65e-28	1.1e-25	down
DLC1	57.0557	4.40072	0.402639	8.31e-28	1.18e-25	up
LRRC8E	607.108	-1.22898	0.112707	1.1e-27	1.56e-25	down
GPR63	200.338	-2.17397	0.199743	1.38e-27	1.93e-25	down
CRIP1	1970.33	2.27604	0.209361	1.58e-27	2.2e-25	up
PEG10	79764.1	1.42911	0.131491	1.63e-27	2.26e-25	up
GPR133	477.224	1.76953	0.162953	1.8e-27	2.48e-25	up
WDR70	1945.11	-0.977949	0.0901302	1.99e-27	2.71e-25	down
LRP11	2015.75	-0.827365	0.0762565	2e-27	2.71e-25	down
TIMP2	6601.21	1.12916	0.104275	2.52e-27	3.4e-25	up
B3GNT3	203.351	1.5342	0.142483	4.89e-27	6.56e-25	up
EGR1	3116.82	6.55162	0.610109	6.72e-27	8.94e-25	up
PTK2	5428.44	0.918931	0.0856462	7.41e-27	9.8e-25	up
DUSP4	166.158	2.60829	0.243378	8.47e-27	1.11e-24	up
FSTL3	2484.71	-1.47178	0.137613	1.07e-26	1.4e-24	down
SUB1	11031.6	-1.02616	0.0966202	2.39e-26	3.1e-24	down
IQGAP2	7183.49	1.46021	0.13762	2.67e-26	3.44e-24	up
GSTO2	60.1033	-4.17164	0.395547	5.27e-26	6.76e-24	down
ANKRD33B	724.379	-1.29688	0.122995	5.41e-26	6.89e-24	down
SERPINB6	4058.91	-0.764156	0.0725239	5.86e-26	7.41e-24	down
ALDH1A3	241.806	-1.52304	0.144703	6.61e-26	8.31e-24	down
DMD	1385.82	1.44266	0.137452	9.04e-26	1.13e-23	up
TLCD1	1390.57	-1.06127	0.10131	1.12e-25	1.39e-23	down
RASD1	54.5798	5.39476	0.515143	1.16e-25	1.43e-23	up
CDH26	185.055	2.86783	0.274326	1.4e-25	1.72e-23	up
SIK2	2498.57	1.00936	0.0968443	1.96e-25	2.39e-23	up
TCF4	2219	0.887026	0.0851978	2.2e-25	2.67e-23	up
IRX4	605.627	2.59288	0.24926	2.42e-25	2.92e-23	up
MOCOS	3521.32	0.877303	0.0848187	4.49e-25	5.39e-23	up
HEIH	261.887	-1.26071	0.121992	4.93e-25	5.85e-23	down
NNMT	163.852	-2.11503	0.204662	4.93e-25	5.85e-23	down
COL25A1	1600.5	2.19367	0.21275	6.28e-25	7.41e-23	up
ADORA1	227.252	2.13047	0.207055	7.87e-25	9.22e-23	up
LOC100130744	199.235	-1.41862	0.138178	9.96e-25	1.16e-22	down
MEIS1-AS3	87.7682	2.37486	0.231419	1.04e-24	1.21e-22	up
PHLDB2	2440.83	1.69309	0.165174	1.18e-24	1.36e-22	up
CYP4X1	46.5126	3.58696	0.350296	1.32e-24	1.51e-22	up
SORBS2	497.126	2.73501	0.267118	1.33e-24	1.51e-22	up
SESN3	3196.63	1.60121	0.156585	1.52e-24	1.72e-22	up
GULP1	1179.61	1.13875	0.111479	1.7e-24	1.92e-22	up
CAB39L	1423.02	1.86884	0.183113	1.86e-24	2.09e-22	up
IMPDH2	23387.1	-0.665931	0.0653616	2.23e-24	2.48e-22	down
CLIC4	2463.23	1.38897	0.136328	2.23e-24	2.48e-22	up
RPL26L1	2463	-0.878514	0.0864141	2.8e-24	3.09e-22	down
PTPRM	1383.46	1.11107	0.109569	3.66e-24	4.01e-22	up
ROBO1	6889.04	1.05032	0.104009	5.62e-24	6.13e-22	up
TBL1X	3931.98	1.01894	0.100935	5.81e-24	6.31e-22	up
CTNNA1	16543.4	-0.578461	0.0573363	6.19e-24	6.68e-22	down
PDE7B	883.326	0.813562	0.0806636	6.38e-24	6.86e-22	up
MARC2	965.151	-0.905083	0.0897989	6.84e-24	7.32e-22	down
IRAK2	379.209	1.55597	0.154598	7.92e-24	8.42e-22	up
PRELID1	13142.2	-0.858559	0.0856859	1.25e-23	1.32e-21	down
NDUFS6	4723.85	-1.15911	0.115721	1.29e-23	1.36e-21	down
ANO1	75.802	2.17072	0.216793	1.34e-23	1.4e-21	up
PDCD6	8528.18	-0.735945	0.0736347	1.61e-23	1.68e-21	down
SLC22A4	645.409	-1.34934	0.135161	1.81e-23	1.87e-21	down
MECOM	2343.67	0.969336	0.0971301	1.87e-23	1.93e-21	up
GAS1	1044.4	0.856072	0.0859234	2.21e-23	2.27e-21	up
RAB32	845.073	-1.01931	0.102341	2.28e-23	2.33e-21	down
SHISA2	70.7892	2.53885	0.255201	2.56e-23	2.6e-21	up
SETD5	9602.35	0.81507	0.0820155	2.85e-23	2.88e-21	up
COL4A4	281.355	2.53763	0.255501	3.02e-23	3.04e-21	up
C19orf10	4079.75	-0.853232	0.085918	3.06e-23	3.06e-21	down
ALDH1A1	54.4122	4.86461	0.490274	3.33e-23	3.32e-21	up
SNHG4	1792.83	-1.15481	0.11657	3.9e-23	3.87e-21	down
PDGFC	249.727	2.28509	0.230998	4.5e-23	4.44e-21	up
H2AFY	12673.4	-0.802048	0.081147	4.89e-23	4.81e-21	down
SRGAP3	112.887	1.89159	0.191753	5.92e-23	5.79e-21	up
MPP1	811.578	-1.83821	0.18672	7.22e-23	7.03e-21	down
PRTG	411.625	1.36579	0.138852	7.85e-23	7.61e-21	up
ZNF572	44.2528	3.05483	0.310723	8.25e-23	7.95e-21	up
DSC2	633.938	1.96095	0.199572	8.72e-23	8.37e-21	up
EML4	3911.84	1.0524	0.107171	9.25e-23	8.84e-21	up
JN872556	49.2001	-5.04444	0.514219	1.02e-22	9.7e-21	down
RAI14	2077.63	-1.02628	0.104697	1.1e-22	1.04e-20	down
SLC1A4	1541.03	0.819165	0.0836458	1.2e-22	1.13e-20	up
MKX	105.479	2.23616	0.228648	1.37e-22	1.29e-20	up
RALGAPA2	1080.12	1.16971	0.119639	1.41e-22	1.32e-20	up
ZFP36L1	2997.22	1.09811	0.112435	1.57e-22	1.46e-20	up
ARMCX2	275.353	-1.70534	0.174801	1.74e-22	1.61e-20	down
PALM2	584.857	1.13577	0.116574	1.98e-22	1.82e-20	up
NPR3	2635.75	-1.12981	0.116215	2.44e-22	2.23e-20	down
CGB5	102.668	-5.00024	0.514591	2.55e-22	2.33e-20	down
CD36	48.6437	3.2635	0.335864	2.56e-22	2.33e-20	up
GDF15	312.53	3.17825	0.327188	2.63e-22	2.37e-20	up
RGL1	108.989	1.83489	0.188897	2.64e-22	2.37e-20	up
FAM107B	1473.99	1.2997	0.13383	2.69e-22	2.42e-20	up
FENDRR	1081.36	-0.748046	0.0771593	3.17e-22	2.83e-20	down
DMC1	55.6164	2.74295	0.282978	3.22e-22	2.87e-20	up
RIMS3	541.866	2.8459	0.293704	3.34e-22	2.95e-20	up
PDP1	573.09	1.26266	0.130433	3.65e-22	3.22e-20	up
CHAF1A	3828.81	-0.918208	0.0950845	4.6e-22	4.04e-20	down
SLC16A4	104.646	3.11743	0.323399	5.44e-22	4.76e-20	up
VHL	3486.16	0.753938	0.0782731	5.85e-22	5.09e-20	up
ITGAD	66.3927	-2.42781	0.252157	6.08e-22	5.27e-20	down
RAC2	125.553	-2.29471	0.239067	8.1e-22	7e-20	down
PLIN4	314.833	3.04905	0.318922	1.17e-21	1.01e-19	up
AK126225	444.072	-1.10953	0.116212	1.33e-21	1.14e-19	down
TMED9	7708.31	-0.796752	0.0834902	1.39e-21	1.18e-19	down
FIBIN	361.368	2.05774	0.215659	1.41e-21	1.19e-19	up
BMPR1B	461.3	1.23377	0.129492	1.61e-21	1.36e-19	up
FABP3	165.864	3.30827	0.347415	1.69e-21	1.42e-19	up
GDF6	49.2452	2.81229	0.295758	1.93e-21	1.62e-19	up
RPS14	41772.7	-0.870777	0.0917936	2.39e-21	2e-19	down
DEPTOR	241.913	1.43993	0.151896	2.55e-21	2.12e-19	up
UGT2B4	40.8712	3.38836	0.358729	3.54e-21	2.93e-19	up
MAML3	303.913	1.4125	0.149569	3.59e-21	2.97e-19	up
MSN	14975.5	-0.697548	0.0739365	3.93e-21	3.23e-19	down
TSHZ2	749.833	1.93584	0.205249	4.04e-21	3.31e-19	up
ARHGAP29	795.079	0.963425	0.102487	5.43e-21	4.43e-19	up
PDGFD	206.834	1.36186	0.145124	6.35e-21	5.16e-19	up
NAP1L1	22683.5	-0.684621	0.0729638	6.41e-21	5.19e-19	down
ABL1	6097.85	0.793157	0.0845578	6.59e-21	5.31e-19	up
NQO2	3467.21	-0.962491	0.102625	6.68e-21	5.36e-19	down
ALDH1L2	3389.84	1.97114	0.210192	6.74e-21	5.39e-19	up
RPS10	8622.72	-0.820089	0.0874798	6.94e-21	5.53e-19	down
MTHFD2	14013	0.903891	0.0965364	7.73e-21	6.14e-19	up
CHD7	4065.8	0.637726	0.0682327	9.07e-21	7.17e-19	up
HTRA3	1865.46	-1.23876	0.13274	1.04e-20	8.17e-19	down
ADARB1	4608.11	-0.886793	0.0950401	1.05e-20	8.25e-19	down
RTKN2	509.108	1.08965	0.11687	1.12e-20	8.79e-19	up
ABCA3	2080.04	-1.30406	0.139933	1.17e-20	9.13e-19	down
DUSP5	523.838	2.25032	0.241872	1.36e-20	1.05e-18	up
PPARGC1A	694.757	1.28847	0.138573	1.43e-20	1.11e-18	up
HBE1	77.9237	-2.26536	0.243889	1.56e-20	1.2e-18	down
KIAA0141	3241.44	-0.727956	0.0784836	1.77e-20	1.36e-18	down
LOC100505817	44.6681	-4.65283	0.501853	1.84e-20	1.41e-18	down
PAN2	2199.53	0.943952	0.101843	1.88e-20	1.43e-18	up
PGRMC1	8908.94	-0.58156	0.0628726	2.25e-20	1.71e-18	down
DHRS4-AS1	732.748	0.834648	0.0902768	2.34e-20	1.77e-18	up
FUZ	206.067	1.54222	0.166902	2.46e-20	1.85e-18	up
SPARC	71.7692	3.86376	0.419074	2.98e-20	2.23e-18	up
WDR52	291.973	-1.53922	0.166972	3.01e-20	2.25e-18	down
RGAG4	100.225	1.66625	0.180882	3.21e-20	2.39e-18	up
ZNF622	2157.86	-1.20181	0.130546	3.39e-20	2.51e-18	down
ARRB1	1027.31	1.5217	0.165442	3.65e-20	2.7e-18	up
CDCP1	601.897	-1.04332	0.113634	4.25e-20	3.14e-18	down
BC005081	736.467	-0.862735	0.0940136	4.44e-20	3.26e-18	down
CLIC1	14694.5	-0.715259	0.0779537	4.5e-20	3.29e-18	down
ROR1	64.5648	2.35646	0.256953	4.7e-20	3.42e-18	up
PARM1	79.3904	2.8336	0.309746	5.79e-20	4.2e-18	up
VIT	52.3237	2.87065	0.313805	5.81e-20	4.2e-18	up
BC014312	141.53	1.40914	0.154106	6.02e-20	4.34e-18	up
FAM102B	7379.29	1.26529	0.138621	7e-20	5.03e-18	up
PLIN3	3173.62	-1.23421	0.135232	7.07e-20	5.06e-18	down
KCNJ15	69.7863	2.81537	0.308707	7.52e-20	5.37e-18	up
DOCK11	1273.96	1.78051	0.195491	8.4e-20	5.98e-18	up
HINT1	13933.4	-0.785661	0.086346	9.12e-20	6.47e-18	down
RAD21	13963.9	0.975111	0.107195	9.32e-20	6.59e-18	up
CD68	579.776	-1.7476	0.192847	1.28e-19	9.01e-18	down
ZCCHC14	4215.79	0.568684	0.0628519	1.46e-19	1.02e-17	up
PCGF1	1194.14	-0.726438	0.0803018	1.48e-19	1.03e-17	down
SPRYD3	2549.79	-1.15324	0.127532	1.53e-19	1.07e-17	down
ZNF217	1517.1	0.993923	0.109922	1.54e-19	1.07e-17	up
CPE	1420.55	1.22108	0.135117	1.61e-19	1.11e-17	up
CREM	1173.16	1.95271	0.216359	1.79e-19	1.24e-17	up
UNC5B	348.106	2.72285	0.301954	1.93e-19	1.32e-17	up
PRKX	4319.9	0.826201	0.0916473	1.97e-19	1.35e-17	up
NAA11	1017.13	-0.667225	0.0740613	2.08e-19	1.42e-17	down
DOK7	112.204	3.40081	0.377858	2.25e-19	1.53e-17	up
UBR5	13602	0.834613	0.0928952	2.6e-19	1.77e-17	up
NTSR1	161.868	2.24165	0.249527	2.62e-19	1.77e-17	up
FAM81A	1805	-0.945497	0.105456	3.08e-19	2.08e-17	down
FAS	374.474	1.11729	0.124655	3.16e-19	2.12e-17	up
ZNF556	318.771	-1.71475	0.191326	3.18e-19	2.13e-17	down
ZSCAN31	267.474	-1.52572	0.170315	3.3e-19	2.2e-17	down
IER2	3372.76	1.37957	0.154261	3.78e-19	2.51e-17	up
TGFB2	243.813	1.4773	0.16519	3.79e-19	2.51e-17	up
TBL2	3465.63	-0.727348	0.0814397	4.22e-19	2.79e-17	down
PTBP2	957.568	1.06988	0.119823	4.31e-19	2.84e-17	up
SRA1	2325.68	-0.893234	0.10005	4.34e-19	2.85e-17	down
ZFYVE20	2498.04	0.680578	0.0762488	4.43e-19	2.9e-17	up
NTNG2	129.296	2.63392	0.295227	4.59e-19	3e-17	up
TRIML2	208.829	2.2348	0.250573	4.71e-19	3.07e-17	up
SLC35G2	509.537	-0.843517	0.0946553	5.04e-19	3.27e-17	down
TTC28	1481.7	0.846678	0.0951099	5.48e-19	3.54e-17	up
QRICH2	77.3285	-2.08748	0.2345	5.49e-19	3.54e-17	down
TRIM62	1723.14	1.81732	0.204539	6.39e-19	4.11e-17	up
DGCR5	148.747	2.31895	0.261029	6.46e-19	4.14e-17	up
MDFIC	501.511	1.1788	0.132744	6.67e-19	4.26e-17	up
FBXO43	643.443	1.0366	0.116904	7.51e-19	4.78e-17	up
GM2A	1427.32	-0.649155	0.0732213	7.6e-19	4.83e-17	down
TUBA4A	12269.4	-1.2198	0.137796	8.58e-19	5.43e-17	down
IQSEC1	1995.1	0.822197	0.0928891	8.64e-19	5.45e-17	up
HARS	7719.21	-0.921008	0.104292	1.04e-18	6.52e-17	down
TM4SF1	3228.92	-0.743147	0.0841853	1.07e-18	6.71e-17	down
SULF2	2911.93	0.686811	0.077865	1.14e-18	7.11e-17	up
AGT	188.118	-2.19023	0.248315	1.14e-18	7.11e-17	down
S100A6	20726.2	-0.732609	0.0830983	1.18e-18	7.36e-17	down
AMACR	692.294	-1.16884	0.132815	1.36e-18	8.44e-17	down
ARV1	1800.18	-0.800931	0.0912353	1.65e-18	1.02e-16	down
COL15A1	1465.68	4.05304	0.461755	1.67e-18	1.03e-16	up
EDN1	37.9313	-3.35387	0.382224	1.71e-18	1.05e-16	down
KLF13	3325.1	0.944058	0.107648	1.79e-18	1.1e-16	up
MICA	1901	-0.805967	0.0919298	1.83e-18	1.12e-16	down
DNAJC21	3780.82	-0.785396	0.0896332	1.91e-18	1.16e-16	down
INPP4B	173.943	1.80895	0.206595	2.02e-18	1.23e-16	up
PHC1	663.837	1.20478	0.137824	2.3e-18	1.39e-16	up
GAPDH	230456	-0.767571	0.0878984	2.49e-18	1.5e-16	down
CACNA1G	128.238	2.15686	0.247299	2.74e-18	1.65e-16	up
PHB2	17340.7	-0.690037	0.0793189	3.33e-18	2e-16	down
LOC389831	1605.62	-0.816547	0.0938751	3.37e-18	2.02e-16	down
PPP1R1C	48.37	2.67321	0.307392	3.43e-18	2.04e-16	up
NR4A2	278.195	1.27222	0.147121	5.27e-18	3.13e-16	up
ITIH4	85.9281	-2.29004	0.265062	5.64e-18	3.34e-16	down
TANC1	1388.28	0.83278	0.0964568	5.94e-18	3.51e-16	up
PIK3C2B	1574.8	0.749239	0.0870357	7.41e-18	4.37e-16	up
SHC1	7033.38	-0.65872	0.0766371	8.3e-18	4.87e-16	down
ZFP64	1916.51	0.676891	0.0787515	8.31e-18	4.87e-16	up
GRB10	3932.95	0.723421	0.0842882	9.27e-18	5.42e-16	up
ERRFI1	490.451	1.3058	0.152161	9.35e-18	5.45e-16	up
MOB3B	697.302	1.27489	0.148625	9.66e-18	5.62e-16	up
RERG	62.7796	7.37839	0.860605	1e-17	5.82e-16	up
DMBT1	65.9035	-3.6958	0.431925	1.16e-17	6.72e-16	down
HNRNPA1P33	688.07	-2.64569	0.309358	1.21e-17	6.96e-16	down
NEURL1B	935.345	2.15185	0.251643	1.22e-17	7e-16	up
LTB4R	840.665	-0.994034	0.116291	1.25e-17	7.19e-16	down
HTRA1	1934.18	-0.585311	0.0686145	1.46e-17	8.33e-16	down
PDE7A	2303.84	0.735402	0.0862499	1.51e-17	8.6e-16	up
ISOC1	2078.67	-0.67553	0.079266	1.56e-17	8.89e-16	down
SH3BP5	6152.44	1.18177	0.138751	1.63e-17	9.27e-16	up
SPSB4	38.1936	3.31301	0.389179	1.7e-17	9.6e-16	up
BRIX1	6564.41	-0.928499	0.109109	1.74e-17	9.82e-16	down
CPNE2	1077.3	0.849699	0.099868	1.77e-17	9.93e-16	up
RPL37	77153.3	-0.967852	0.1138	1.82e-17	1.02e-15	down
NSUN2	14687	-1.00457	0.118296	2.03e-17	1.14e-15	down
CHRAC1	2994.41	0.712647	0.0840799	2.33e-17	1.3e-15	up
STS	1390.04	1.18616	0.140083	2.51e-17	1.39e-15	up
TSPAN1	482.804	1.4825	0.175135	2.56e-17	1.42e-15	up
SDR16C5	683.635	2.38166	0.281537	2.69e-17	1.49e-15	up
BC038204	150.99	2.6413	0.312262	2.71e-17	1.49e-15	up
EMC4	4077.65	-0.640685	0.0758179	2.91e-17	1.6e-15	down
TXNDC15	1540.55	-0.563686	0.0667811	3.15e-17	1.73e-15	down
ICAM1	74.4991	-7.65567	0.907278	3.23e-17	1.77e-15	down
TSPEAR	34.5922	-3.45599	0.410127	3.56e-17	1.94e-15	down
ATP6V0E1	3436.14	-1.01386	0.120328	3.58e-17	1.95e-15	down
WDFY2	410.88	0.841237	0.0998526	3.61e-17	1.96e-15	up
ANO3	30.2887	3.63115	0.43142	3.87e-17	2.1e-15	up
ANXA3	1074.06	-1.89563	0.225382	4.07e-17	2.2e-15	down
ANKRD28	3716.8	0.905284	0.10768	4.2e-17	2.26e-15	up
MGST1	3298.62	-0.847982	0.100882	4.25e-17	2.29e-15	down
TMEM2	1182.4	1.03451	0.12315	4.45e-17	2.38e-15	up
MAP2K2	3903.86	-1.09355	0.130296	4.75e-17	2.54e-15	down
FOS	1322.8	4.19814	0.50074	5.12e-17	2.73e-15	up
ANPEP	3412.95	1.45244	0.173288	5.22e-17	2.78e-15	up
CUTA	4419.71	-0.727278	0.0870393	6.5e-17	3.45e-15	down
GLA	4003.69	-0.710378	0.0850965	6.95e-17	3.68e-15	down
PCDH17	1310.55	1.53039	0.183425	7.22e-17	3.81e-15	up
GUCY1A2	64.4114	2.30528	0.276306	7.23e-17	3.81e-15	up
TGFBI	6945.24	-2.4574	0.294844	7.78e-17	4.08e-15	down
AP1M2	1143.55	-1.3487	0.16215	8.98e-17	4.7e-15	down
HHAT	40.1713	2.64836	0.318473	9.11e-17	4.76e-15	up
STEAP3	3922.89	-0.928033	0.111629	9.29e-17	4.84e-15	down
THOC3	1162.43	-0.588686	0.0708515	9.67e-17	5.03e-15	down
HIGD2A	3283.61	-0.8114	0.0977842	1.06e-16	5.5e-15	down
ALPPL2	48.3831	3.34482	0.403209	1.08e-16	5.59e-15	up
CCDC127	1154.07	-0.732428	0.0883051	1.09e-16	5.64e-15	down
CEP170	4101.81	0.830064	0.100241	1.22e-16	6.3e-15	up
MED13L	3319.05	0.903985	0.109197	1.25e-16	6.4e-15	up
CFH	3021.8	1.80213	0.218099	1.42e-16	7.28e-15	up
NOS1AP	157.449	1.87614	0.227121	1.45e-16	7.41e-15	up
DUSP6	50.2577	2.91207	0.353213	1.66e-16	8.45e-15	up
SOX17	26.9344	-3.60205	0.436985	1.68e-16	8.54e-15	down
FST	262.92	-2.75564	0.334384	1.71e-16	8.66e-15	down
LOC90784	916.621	-1.08721	0.131977	1.75e-16	8.87e-15	down
FRMD4B	142.498	2.12019	0.257641	1.88e-16	9.51e-15	up
KAL1	117.96	1.55542	0.189036	1.9e-16	9.57e-15	up
VAV1	870.087	-0.918978	0.111711	1.93e-16	9.69e-15	down
CREB5	48.0487	2.47704	0.301523	2.12e-16	1.06e-14	up
RAET1E	47.7845	-2.43497	0.29671	2.28e-16	1.14e-14	down
AX747064	57.0715	2.68472	0.327294	2.35e-16	1.17e-14	up
SLC35F6	1912.73	-0.971032	0.118385	2.36e-16	1.17e-14	down
C15orf38	515.62	0.769399	0.0939556	2.63e-16	1.31e-14	up
LONP1	5517.72	-1.35017	0.164917	2.68e-16	1.33e-14	down
SIPA1L1	2555.58	0.87947	0.107581	2.96e-16	1.46e-14	up
HARS2	3182.35	-0.617476	0.0755463	3e-16	1.48e-14	down
RPRM	247.156	1.9172	0.234573	3e-16	1.48e-14	up
MRPL20	4055.85	-0.749148	0.0916657	3.02e-16	1.48e-14	down
CAMK2B	37.4929	2.81302	0.344233	3.04e-16	1.49e-14	up
PAR5	223.375	1.85448	0.227707	3.82e-16	1.86e-14	up
CACNA1H	543.999	1.99559	0.245044	3.83e-16	1.86e-14	up
CAV1	1908.57	-2.05508	0.252351	3.83e-16	1.86e-14	down
ECHDC3	59.3214	-2.50635	0.307986	4.02e-16	1.95e-14	down
NDST3	44.2132	2.37533	0.292316	4.44e-16	2.15e-14	up
IFI44L	1171.73	1.22075	0.150246	4.47e-16	2.16e-14	up
PALMD	297.82	0.962167	0.118427	4.49e-16	2.16e-14	up
SCIN	138.748	1.61786	0.199423	4.95e-16	2.38e-14	up
TRIB1	370.352	0.980362	0.120851	4.97e-16	2.38e-14	up
LOC100506123	71.7598	-2.35252	0.290177	5.18e-16	2.47e-14	down
ANO2	38.1821	-3.25996	0.402291	5.34e-16	2.54e-14	down
TRPV2	270.72	1.45747	0.179858	5.34e-16	2.54e-14	up
FOXP1	1122.64	1.10398	0.136309	5.54e-16	2.63e-14	up
SSBP2	351.817	1.37195	0.169453	5.66e-16	2.68e-14	up
BC014180	1497.03	-1.00024	0.12355	5.69e-16	2.69e-14	down
SKP1	11325.5	-0.739726	0.0914357	5.96e-16	2.81e-14	down
TSPAN17	1560.43	-0.852351	0.105546	6.71e-16	3.16e-14	down
CXCR7	49.4802	2.76128	0.342119	6.97e-16	3.27e-14	up
PLEKHG5	478.279	1.52791	0.189317	6.99e-16	3.27e-14	up
RASSF3	1392.02	0.65923	0.0817361	7.3e-16	3.41e-14	up
TRIM16L	2225.88	-1.03735	0.128765	7.87e-16	3.67e-14	down
KLRC3	33.1984	3.09406	0.384512	8.5e-16	3.95e-14	up
CORO2A	1942.28	0.904887	0.112909	1.11e-15	5.14e-14	up
SVIL	2022.44	2.30858	0.28817	1.14e-15	5.26e-14	up
FANCD2	6114.97	0.666085	0.0831917	1.18e-15	5.44e-14	up
GUSBP1	464.464	-1.49554	0.186835	1.2e-15	5.52e-14	down
EXOC3	4334.85	-0.811453	0.101378	1.2e-15	5.53e-14	down
SPINK5	79.1432	1.97284	0.246565	1.23e-15	5.65e-14	up
LAP3	2213.62	-0.911585	0.113976	1.26e-15	5.79e-14	down
PLXNA2	1327.03	1.63295	0.204318	1.33e-15	6.05e-14	up
CDHR5	524.61	1.94725	0.243649	1.33e-15	6.05e-14	up
WNT16	24.7358	3.94998	0.495306	1.53e-15	6.94e-14	up
MRO	48.0213	2.77892	0.348491	1.53e-15	6.96e-14	up
MRPS30	4436.78	-0.829419	0.104048	1.57e-15	7.09e-14	down
MATK	1069.27	-1.67618	0.210318	1.59e-15	7.18e-14	down
SLC27A6	27.0428	-5.179	0.649862	1.59e-15	7.18e-14	down
LAMA1	1843.81	2.45618	0.308527	1.71e-15	7.67e-14	up
BAHCC1	481.319	-1.50263	0.189168	1.97e-15	8.83e-14	down
SLC16A10	882.168	0.984029	0.123893	1.98e-15	8.87e-14	up
SOAT1	4774.07	-0.756166	0.0955507	2.5e-15	1.12e-13	down
CBR1	3142.88	-0.647346	0.081808	2.51e-15	1.12e-13	down
MUC12	29.6115	5.24474	0.662909	2.54e-15	1.13e-13	up
COL6A2	76.3424	-2.41552	0.305444	2.61e-15	1.16e-13	down
PTN	25.1701	-4.04015	0.511007	2.65e-15	1.17e-13	down
SDC2	544.053	1.84451	0.23343	2.75e-15	1.21e-13	up
WSCD1	569.81	0.765298	0.096852	2.75e-15	1.21e-13	up
EPGN	296.147	2.28537	0.289239	2.76e-15	1.21e-13	up
GALNT10	1581.85	-0.893049	0.113038	2.78e-15	1.22e-13	down
RAB11FIP1	2696.11	0.703741	0.0891191	2.87e-15	1.26e-13	up
TAGLN2	36121.9	-0.845523	0.107154	3e-15	1.31e-13	down
CCR1	29.5199	5.53648	0.702312	3.19e-15	1.39e-13	up
GTF2H2	383.244	-1.0249	0.130153	3.42e-15	1.49e-13	down
FOXS1	43.6993	3.35545	0.426198	3.46e-15	1.5e-13	up
SLC26A6	912.093	-0.838773	0.106639	3.68e-15	1.59e-13	down
LRCH1	806.126	0.767106	0.0975725	3.78e-15	1.64e-13	up
STAU2	1998.49	0.839928	0.10687	3.86e-15	1.67e-13	up
EMP3	4957.44	-1.07514	0.136937	4.12e-15	1.77e-13	down
CLPTM1L	10819.9	-0.86598	0.110367	4.28e-15	1.84e-13	down
EHF	31.3291	4.14118	0.527855	4.32e-15	1.85e-13	up
TRPS1	1072.46	0.872411	0.111227	4.38e-15	1.88e-13	up
SOX9	264.544	1.46775	0.18732	4.67e-15	1.99e-13	up
SQSTM1	18857.6	-1.48984	0.190434	5.14e-15	2.19e-13	down
ANKHD1-EIF4EBP3	172.089	-1.33341	0.170647	5.55e-15	2.36e-13	down
TMTC1	3480.89	0.695464	0.0890082	5.56e-15	2.36e-13	up
CDK19	1441.35	1.01528	0.129979	5.67e-15	2.4e-13	up
PTGER4	192.908	1.17401	0.150334	5.75e-15	2.43e-13	up
CBLB	448.175	1.00868	0.129364	6.33e-15	2.67e-13	up
C19orf70	1132.91	-1.27071	0.163007	6.42e-15	2.7e-13	down
VMP1	7152.59	-0.871825	0.111852	6.47e-15	2.72e-13	down
KRT86	52.9985	2.35311	0.302102	6.75e-15	2.83e-13	up
ATP8B1	240.408	1.06927	0.137315	6.86e-15	2.87e-13	up
KCNJ12	552.845	1.68716	0.216765	7.06e-15	2.95e-13	up
SLC7A2	8736.51	1.22686	0.157716	7.31e-15	3.05e-13	up
C5	67.3601	1.72833	0.222358	7.68e-15	3.2e-13	up
HNRNPM	15879.7	-0.563789	0.0725381	7.71e-15	3.2e-13	down
DCBLD1	2622.35	-0.955282	0.122943	7.84e-15	3.25e-13	down
DQ574852	1926.34	0.572409	0.0736755	7.89e-15	3.26e-13	up
TNS1	147.538	-2.13895	0.275344	7.96e-15	3.28e-13	down
LRRC59	14580.3	-0.672495	0.0865731	7.98e-15	3.29e-13	down
SLC22A5	1015.98	-0.79372	0.102207	8.11e-15	3.33e-13	down
DENND3	1867.87	1.56403	0.201472	8.29e-15	3.4e-13	up
GATA5	26.4527	3.68698	0.474944	8.3e-15	3.4e-13	up
FBXL17	483.669	-1.72268	0.221971	8.44e-15	3.45e-13	down
PODXL	6734.45	0.510661	0.0659227	9.46e-15	3.86e-13	up
SLC35A4	7342.79	-0.856621	0.110635	9.73e-15	3.96e-13	down
JTB	8510.32	-0.660095	0.0852931	1e-14	4.07e-13	down
SHROOM1	832.1	-0.992699	0.128311	1.02e-14	4.14e-13	down
FGFBP1	89.713	-2.28362	0.295552	1.1e-14	4.46e-13	down
C9orf64	1112.24	0.733736	0.0949631	1.11e-14	4.46e-13	up
JN872559	28.7598	-4.37782	0.566976	1.15e-14	4.64e-13	down
TRIB3	3475.38	0.939606	0.121704	1.16e-14	4.66e-13	up
HFE	475.79	-0.805087	0.104308	1.18e-14	4.73e-13	down
PAQR7	602.463	-0.757818	0.0982979	1.26e-14	5.07e-13	down
C8orf31	351.214	1.0688	0.13893	1.44e-14	5.74e-13	up
ZNF883	357.041	-1.00844	0.131158	1.49e-14	5.93e-13	down
NYNRIN	235.085	2.6676	0.347177	1.55e-14	6.16e-13	up
TBC1D2	565.422	-1.20814	0.157276	1.57e-14	6.25e-13	down
SOS2	872.273	0.955704	0.12447	1.61e-14	6.4e-13	up
IGFBP2	3904.44	1.30715	0.170481	1.75e-14	6.95e-13	up
WISP2	357.597	-1.8181	0.237329	1.85e-14	7.31e-13	down
CACNB2	118.328	3.23428	0.422204	1.85e-14	7.31e-13	up
FGD5-AS1	3853.98	0.762533	0.0998429	2.22e-14	8.73e-13	up
MSANTD3	1740.87	-0.831474	0.108889	2.24e-14	8.81e-13	down
EEF2	94638.9	-1.17859	0.154411	2.3e-14	9.01e-13	down
CDKN2AIPNL	1732.11	-0.696814	0.0914851	2.6e-14	1.02e-12	down
AK023809	121.306	2.73106	0.358793	2.7e-14	1.06e-12	up
CGGBP1	1581.13	0.972255	0.127781	2.77e-14	1.08e-12	up
FAM129A	1188.13	1.54586	0.203188	2.78e-14	1.08e-12	up
ALPP	415.343	1.80355	0.237082	2.8e-14	1.09e-12	up
C5orf22	1649.86	-0.828585	0.109038	2.98e-14	1.16e-12	down
KIAA1161	1331.04	1.35705	0.179077	3.51e-14	1.36e-12	up
MEGF9	2590.48	1.15618	0.152618	3.57e-14	1.38e-12	up
CDK5	1138.97	-0.720055	0.0950769	3.64e-14	1.4e-12	down
ADCY10P1	44.688	-2.27159	0.299958	3.65e-14	1.4e-12	down
TCFL5	3633.93	0.662537	0.0875462	3.79e-14	1.46e-12	up
KRT83	30.9747	3.01619	0.398602	3.82e-14	1.47e-12	up
TUBB	107908	-0.653871	0.086422	3.85e-14	1.47e-12	down
LOC100506834	80.7034	1.72293	0.227765	3.89e-14	1.49e-12	up
MAP2	545.021	4.09318	0.541647	4.13e-14	1.57e-12	up
YTHDC2	3530.78	-0.722555	0.0956316	4.17e-14	1.59e-12	down
AF268386	709.825	1.71503	0.22711	4.3e-14	1.63e-12	up
PEX6	998.237	-0.991922	0.131535	4.66e-14	1.77e-12	down
RPS12	58919.4	-0.705326	0.0935405	4.69e-14	1.77e-12	down
UQCRQ	7040.42	-0.883521	0.117408	5.26e-14	1.99e-12	down
SCUBE1	63.9647	2.85172	0.379106	5.39e-14	2.03e-12	up
HSPA4	22213.6	-0.727297	0.0967337	5.54e-14	2.08e-12	down
EXTL3	2395.2	0.520669	0.0692528	5.55e-14	2.08e-12	up
PRKAG1	5553.61	-0.604153	0.0804171	5.79e-14	2.17e-12	down
RFK	1776.35	0.840693	0.111923	5.85e-14	2.19e-12	up
APBB3	962.739	-0.788639	0.105122	6.28e-14	2.35e-12	down
ST3GAL1	1302.06	0.625388	0.0833986	6.44e-14	2.4e-12	up
TRIP13	8655.8	-0.668457	0.0891861	6.63e-14	2.47e-12	down
NR2C2	2458.18	0.860903	0.11487	6.65e-14	2.47e-12	up
SLCO2A1	57.1368	-2.09528	0.279879	7.08e-14	2.63e-12	down
SRP19	2962.39	-0.710576	0.0949327	7.15e-14	2.65e-12	down
CYTH1	1152.59	0.769083	0.102812	7.4e-14	2.74e-12	up
PDE4C	46.026	1.98726	0.265668	7.42e-14	2.74e-12	up
KIAA1324	160.44	-2.92468	0.391133	7.58e-14	2.79e-12	down
ICAM3	333.518	-0.880325	0.117755	7.67e-14	2.82e-12	down
PDAP1	8738.32	-0.783575	0.104844	7.8e-14	2.86e-12	down
SEMA6D	671.445	1.37066	0.183449	7.92e-14	2.9e-12	up
HMGXB3	5204.32	-0.532118	0.0712625	8.2e-14	3e-12	down
PARD6B	227.118	1.03932	0.139285	8.53e-14	3.12e-12	up
LAMA3	2009.27	0.695117	0.0932146	8.84e-14	3.22e-12	up
SETMAR	419.431	-0.820811	0.11008	8.88e-14	3.23e-12	down
ARL13B	616.933	0.833821	0.111873	9.11e-14	3.31e-12	up
PLEKHG1	76.1791	3.08651	0.414523	9.63e-14	3.49e-12	up
NOP16	5788.1	-1.06557	0.143111	9.64e-14	3.49e-12	down
ESRP2	1995.85	-0.875641	0.117717	1.02e-13	3.68e-12	down
PCBP4	1309.73	1.06483	0.143243	1.06e-13	3.81e-12	up
C20orf166-AS1	62.7275	3.73132	0.502117	1.08e-13	3.88e-12	up
BOLA3	2649.97	-0.655181	0.0882225	1.12e-13	4.01e-12	down
SRPR	5600.75	-0.558876	0.0752717	1.13e-13	4.05e-12	down
TIMP3	445.381	0.903441	0.121775	1.18e-13	4.23e-12	up
MRPL54	1229.53	-1.17526	0.158549	1.24e-13	4.43e-12	down
LOXL1	596.383	1.32715	0.179139	1.28e-13	4.56e-12	up
POLR3G	1587	-0.858146	0.115951	1.35e-13	4.82e-12	down
LDHA	109753	-0.658995	0.0892368	1.53e-13	5.43e-12	down
SULT1C2	41.5573	2.50612	0.339697	1.61e-13	5.73e-12	up
STRIP1	3447.24	0.464244	0.0629607	1.66e-13	5.89e-12	up
ATP8B3	777.916	-0.986594	0.133948	1.76e-13	6.25e-12	down
EDA	113.823	-1.26742	0.172422	1.97e-13	6.97e-12	down
CIRBP	4088.02	-0.562622	0.076575	2.02e-13	7.13e-12	down
SNCA	714.578	1.1057	0.150713	2.19e-13	7.72e-12	up
PSMB5	10717.6	-0.688359	0.0938403	2.21e-13	7.77e-12	down
NSFL1C	2519.3	-0.646183	0.0880947	2.22e-13	7.78e-12	down
LGALS8	21.4904	4.19832	0.572572	2.26e-13	7.92e-12	up
LOC729041	60.5725	2.03539	0.277634	2.28e-13	7.98e-12	up
TARS	29909.2	-0.688854	0.0939824	2.31e-13	8.06e-12	down
AACSP1	193.253	-10.6384	1.45158	2.32e-13	8.09e-12	down
PDIA4	8574.1	-0.491605	0.0671337	2.43e-13	8.45e-12	down
SAMD5	21.9014	-3.94354	0.53871	2.47e-13	8.59e-12	down
MRPS36	1471.6	-0.627793	0.0857668	2.48e-13	8.61e-12	down
BC007399	70.4613	-1.75799	0.24025	2.53e-13	8.76e-12	down
TNFRSF12A	3526.54	-1.82017	0.248765	2.54e-13	8.78e-12	down
KIAA1549	2701.72	0.489762	0.0669407	2.55e-13	8.79e-12	up
RABGGTB	8156	-0.594744	0.081335	2.63e-13	9.05e-12	down
TMF1	1145.23	0.706367	0.0967794	2.9e-13	9.99e-12	up
GOLPH3	4040.61	-0.653291	0.0895249	2.94e-13	1.01e-11	down
HIST2H2BE	345.566	0.924579	0.126804	3.07e-13	1.05e-11	up
CCDC34	3198.6	0.614704	0.0844098	3.28e-13	1.12e-11	up
ENO1	117350	-0.618081	0.0848763	3.29e-13	1.12e-11	down
SYCE2	66.9655	1.61419	0.221727	3.34e-13	1.14e-11	up
ZBTB10	359.687	1.27772	0.175576	3.41e-13	1.16e-11	up
NTN3	65.3288	3.52587	0.484566	3.43e-13	1.17e-11	up
JPH2	68.2108	2.28006	0.313402	3.46e-13	1.17e-11	up
ITGBL1	663.83	-2.11243	0.290591	3.61e-13	1.22e-11	down
SYDE2	273.974	1.26186	0.173649	3.68e-13	1.25e-11	up
SH3KBP1	1865.96	0.615291	0.0846797	3.7e-13	1.25e-11	up
SAMD12	579.814	1.01023	0.139062	3.74e-13	1.26e-11	up
ANXA4	398.986	-0.98844	0.136101	3.8e-13	1.28e-11	down
ARHGAP20	22.3687	-3.48951	0.48051	3.81e-13	1.28e-11	down
NCOA7	3004.69	0.782543	0.107778	3.85e-13	1.29e-11	up
POLR2H	4118.88	-0.564885	0.0778767	4.06e-13	1.36e-11	down
PELO	1531.01	-0.679114	0.0936582	4.14e-13	1.38e-11	down
B4GALT6	600.618	1.12128	0.154745	4.29e-13	1.43e-11	up
MAPK8	894.719	0.751818	0.103798	4.39e-13	1.46e-11	up
THSD4	470.358	1.28911	0.177985	4.39e-13	1.46e-11	up
UPF3A	3549.18	0.488806	0.0674935	4.41e-13	1.47e-11	up
NAPEPLD	369.418	-0.857513	0.118464	4.53e-13	1.5e-11	down
COBLL1	396.439	1.02337	0.141391	4.56e-13	1.51e-11	up
AK056973	139.346	1.24019	0.171568	4.88e-13	1.61e-11	up
NGFR	36.7391	3.17583	0.439559	5.01e-13	1.65e-11	up
ELL2	3411.12	0.84208	0.116684	5.32e-13	1.76e-11	up
NCR3LG1	2352.19	1.17249	0.162705	5.75e-13	1.89e-11	up
MSRB3	413.906	-0.71431	0.0991377	5.79e-13	1.9e-11	down
ZNF57	356.649	-1.02932	0.142919	5.93e-13	1.94e-11	down
RND3	1129.8	0.705722	0.098015	6.01e-13	1.97e-11	up
SNHG5	2055.94	-0.606137	0.0842163	6.14e-13	2.01e-11	down
MAP3K9	362.8	0.789348	0.109727	6.3e-13	2.06e-11	up
BTBD3	5924.75	0.658695	0.0915767	6.35e-13	2.07e-11	up
OR51B5	43.7211	-1.88479	0.262303	6.69e-13	2.18e-11	down
STX16	6998.66	0.485146	0.0676168	7.23e-13	2.35e-11	up
MMRN2	373.904	2.45914	0.342806	7.31e-13	2.37e-11	up
ARHGAP28	256.068	1.4058	0.195989	7.34e-13	2.38e-11	up
TUBB6	4452.68	-0.707758	0.0986809	7.38e-13	2.39e-11	down
NR2C2AP	1305.91	-0.740317	0.103245	7.47e-13	2.41e-11	down
NFKBIZ	281.746	0.947416	0.132304	8.02e-13	2.58e-11	up
TMEM59L	45.6877	2.60456	0.363936	8.27e-13	2.66e-11	up
EBPL	1402.24	-0.566394	0.0791762	8.45e-13	2.72e-11	down
LINC00842	55.1415	-1.84722	0.258232	8.47e-13	2.72e-11	down
HMOX2	2204.34	-0.799033	0.111716	8.53e-13	2.73e-11	down
BCL2	170.071	1.18697	0.166007	8.67e-13	2.77e-11	up
MED10	1476.18	-1.04312	0.145916	8.75e-13	2.8e-11	down
SPTBN5	58.2447	-1.78426	0.249716	8.99e-13	2.87e-11	down
KSR1	2545.61	0.870585	0.121948	9.4e-13	2.99e-11	up
DMBX1	227.431	1.46055	0.204591	9.41e-13	2.99e-11	up
NHS	2563.3	0.730845	0.102394	9.5e-13	3.02e-11	up
CACNA1D	21.7119	-3.6804	0.51583	9.68e-13	3.07e-11	down
SEMA3D	111.728	1.56824	0.219806	9.7e-13	3.07e-11	up
FBN1	1567.81	0.963318	0.135122	1.01e-12	3.19e-11	up
GPT2	3067.94	1.15048	0.161429	1.03e-12	3.24e-11	up
TGFBR1	1778.96	0.804433	0.112931	1.05e-12	3.32e-11	up
BC033837	633.058	-0.623247	0.0875809	1.11e-12	3.49e-11	down
CLTB	1555.21	-1.1025	0.155121	1.18e-12	3.72e-11	down
GTF2F1	3895.48	-0.884207	0.124515	1.24e-12	3.88e-11	down
TMOD2	106.025	1.33141	0.187559	1.26e-12	3.95e-11	up
TPI1	46027.2	-0.595165	0.083845	1.26e-12	3.95e-11	down
CALHM2	24.0776	3.24639	0.457382	1.27e-12	3.96e-11	up
PLIN2	615.57	1.21601	0.171381	1.29e-12	4.02e-11	up
CD320	3705.2	-1.40833	0.198612	1.33e-12	4.15e-11	down
PITPNM3	213.114	-0.996897	0.140636	1.36e-12	4.21e-11	down
DPAGT1	2456.94	-0.543156	0.0767662	1.49e-12	4.62e-11	down
GPER	55.9502	2.83016	0.400089	1.51e-12	4.67e-11	up
FHL1	1941.78	1.2146	0.171903	1.6e-12	4.94e-11	up
EEF1A1	351196	-0.630161	0.0891892	1.6e-12	4.94e-11	down
AX747770	115.224	-1.45732	0.206265	1.6e-12	4.94e-11	down
LINC00883	447.275	0.813815	0.115485	1.83e-12	5.63e-11	up
C1orf52	774.52	0.531863	0.0754749	1.83e-12	5.63e-11	up
PAPSS2	1223.39	1.21639	0.17263	1.84e-12	5.65e-11	up
RIMKLB	3474.76	0.762241	0.108246	1.9e-12	5.82e-11	up
TMEM47	1011.34	1.04611	0.148861	2.1e-12	6.44e-11	up
PSPH	2724.56	0.72699	0.103583	2.24e-12	6.86e-11	up
SLITRK4	278.958	1.15091	0.164174	2.38e-12	7.26e-11	up
LINC00665	23.089	-2.94891	0.420809	2.42e-12	7.38e-11	down
MADD	4357.44	0.441144	0.0630476	2.62e-12	7.96e-11	up
PSD2	49.2725	2.93646	0.419832	2.66e-12	8.1e-11	up
HPCA	28.1168	2.58826	0.37007	2.67e-12	8.11e-11	up
MAP3K14	1928.5	-1.46742	0.2099	2.73e-12	8.27e-11	down
ANK1	261.463	-1.38931	0.198737	2.74e-12	8.27e-11	down
DOCK6	2179.85	1.18158	0.169026	2.74e-12	8.27e-11	up
NEU1	1707.62	-0.818851	0.117292	2.92e-12	8.82e-11	down
ADC	106.11	1.57642	0.225838	2.94e-12	8.87e-11	up
AOC2	79.5521	-1.57417	0.225681	3.05e-12	9.19e-11	down
RYR2	533.071	0.973565	0.1396	3.08e-12	9.26e-11	up
THOP1	4508.82	-1.24663	0.178776	3.1e-12	9.3e-11	down
SULF1	46.396	2.64833	0.379807	3.11e-12	9.3e-11	up
CNDP2	4619.4	-0.550424	0.0789521	3.13e-12	9.37e-11	down
AK094188	296.589	1.65708	0.23776	3.18e-12	9.49e-11	up
PLEKHA5	1114.52	0.667637	0.0958473	3.27e-12	9.75e-11	up
GXYLT2	237.177	1.66292	0.238846	3.35e-12	9.97e-11	up
BX641154	1549.65	-0.809609	0.116369	3.47e-12	1.03e-10	down
TRAPPC3L	37.7437	2.97886	0.42833	3.54e-12	1.05e-10	up
UBL7	1707.54	-0.599245	0.0861668	3.54e-12	1.05e-10	down
STON2	1800.24	0.64034	0.0921084	3.6e-12	1.07e-10	up
LINC00707	58.5334	-4.15343	0.597494	3.62e-12	1.07e-10	down
MYH14	328.446	2.53731	0.365169	3.7e-12	1.09e-10	up
BCL2L11	1440.95	0.546264	0.0786615	3.8e-12	1.12e-10	up
ITPRIP	2435.03	0.886676	0.127692	3.82e-12	1.12e-10	up
AGPAT1	3662.27	-0.507307	0.0730788	3.87e-12	1.14e-10	down
BC039168	65.5476	1.58797	0.228772	3.89e-12	1.14e-10	up
RERE	1576.47	0.723539	0.104313	4.03e-12	1.18e-10	up
LRRK1	537.444	-1.28465	0.185404	4.24e-12	1.24e-10	down
EPB41L4A	174.924	-1.63251	0.235825	4.44e-12	1.3e-10	down
OAZ1	16341.4	-0.814475	0.117675	4.47e-12	1.31e-10	down
ITGA7	179.084	1.39839	0.202072	4.51e-12	1.31e-10	up
TUBB2A	604.044	-0.696791	0.100689	4.51e-12	1.31e-10	down
NABP2	3574.52	-0.562091	0.081281	4.67e-12	1.36e-10	down
C4BPB	338.216	-1.03306	0.149516	4.87e-12	1.41e-10	down
CDYL2	735.646	0.60884	0.0881587	4.98e-12	1.44e-10	up
MAK	41.9932	1.76378	0.255552	5.13e-12	1.49e-10	up
QSOX1	4002.43	-0.903156	0.13087	5.16e-12	1.49e-10	down
KIAA1211	1106.89	0.712814	0.103292	5.16e-12	1.49e-10	up
SEC61G	3750.37	-0.533659	0.0773724	5.3e-12	1.53e-10	down
RALGPS2	871.357	1.22179	0.177144	5.31e-12	1.53e-10	up
FZD7	744.556	0.791759	0.114861	5.46e-12	1.57e-10	up
EPHA3	302.902	1.3908	0.201774	5.47e-12	1.57e-10	up
ZCCHC24	1739.92	1.17176	0.170013	5.49e-12	1.57e-10	up
MRPL27	3142.26	-0.74576	0.10822	5.54e-12	1.58e-10	down
ZMAT2	5665.55	-0.648679	0.0941811	5.68e-12	1.62e-10	down
GYS1	4109.01	-0.559786	0.0813064	5.78e-12	1.65e-10	down
CA14	88.7636	2.47903	0.360155	5.85e-12	1.67e-10	up
CDH6	183.35	1.14615	0.166537	5.89e-12	1.68e-10	up
PSMD8	6734.24	-0.600077	0.0872184	5.98e-12	1.7e-10	down
GRK6	1582.3	-1.04239	0.151907	6.79e-12	1.93e-10	down
SLC39A1	8967.82	-0.63272	0.0922317	6.88e-12	1.95e-10	down
NADSYN1	1768.36	-0.784273	0.114402	7.11e-12	2.01e-10	down
ECE2	997.923	-1.0273	0.149951	7.34e-12	2.07e-10	down
THSD7A	23.1009	5.49805	0.802671	7.4e-12	2.09e-10	up
CTCFL	91.5683	1.3055	0.1906	7.42e-12	2.09e-10	up
LMO2	121.54	2.87716	0.420183	7.52e-12	2.12e-10	up
BNIP2	2193.34	0.736241	0.107658	7.99e-12	2.25e-10	up
RPL36	12769.7	-1.28105	0.1874	8.15e-12	2.29e-10	down
ANGPT1	130.549	1.42934	0.209186	8.32e-12	2.33e-10	up
SERPINF1	979.075	2.89596	0.42384	8.33e-12	2.33e-10	up
PRKD3	2569.39	0.750741	0.109934	8.55e-12	2.39e-10	up
IRF1	541	-0.774778	0.113525	8.81e-12	2.46e-10	down
CYFIP2	1299.52	2.81616	0.412748	8.92e-12	2.49e-10	up
RABEPK	2756.2	-0.753162	0.110437	9.11e-12	2.54e-10	down
CXorf40A	451.335	-0.785887	0.115252	9.18e-12	2.55e-10	down
SNHG12	1434.09	-0.577819	0.0847432	9.2e-12	2.56e-10	down
PSMB3	8460.4	-0.585524	0.0858929	9.3e-12	2.58e-10	down
KCNQ2	185.465	1.51077	0.221657	9.38e-12	2.6e-10	up
TMED3	4525.5	-0.491571	0.0722078	9.92e-12	2.74e-10	down
BCHE	159.116	1.57191	0.230931	9.98e-12	2.76e-10	up
SRGAP2B	460.777	0.760834	0.1118	1.01e-11	2.78e-10	up
RAB30	1051.14	1.00325	0.14743	1.01e-11	2.78e-10	up
SH3BGRL3	1863.3	-0.982603	0.14445	1.03e-11	2.83e-10	down
RAD1	2956.23	-0.799317	0.11754	1.04e-11	2.86e-10	down
NAA10	5536.93	-0.642079	0.0944192	1.04e-11	2.86e-10	down
VDAC3	7071.73	-0.575892	0.0847409	1.08e-11	2.95e-10	down
PTPN14	5014.51	0.733038	0.107904	1.09e-11	3e-10	up
TTC38	3489.93	-0.688195	0.101334	1.11e-11	3.04e-10	down
ZNF32	65.5955	1.84206	0.271285	1.12e-11	3.06e-10	up
SLC1A1	869.553	0.946102	0.139401	1.15e-11	3.12e-10	up
SAR1B	3241.71	-0.553279	0.0815785	1.18e-11	3.22e-10	down
SNORD60	212.108	-1.07998	0.159318	1.21e-11	3.29e-10	down
PFKM	16132.4	-0.450635	0.0665777	1.3e-11	3.53e-10	down
PRR15L	22.3658	3.49095	0.516005	1.33e-11	3.61e-10	up
SCAMP5	200.246	1.36418	0.20167	1.34e-11	3.62e-10	up
PHLDA1	275.547	0.934055	0.138189	1.39e-11	3.75e-10	up
C2orf54	28.8261	2.90196	0.429711	1.45e-11	3.9e-10	up
PPARG	907.14	0.812971	0.120418	1.47e-11	3.95e-10	up
SLC25A5	34886.7	-0.403991	0.059855	1.48e-11	4e-10	down
TXN	15338.1	-0.604523	0.0896128	1.52e-11	4.09e-10	down
BC009735	410.02	2.24607	0.332988	1.53e-11	4.11e-10	up
SSBP1	8753.79	-0.592927	0.0879958	1.6e-11	4.31e-10	down
C1QTNF1	360.283	1.24913	0.185416	1.62e-11	4.34e-10	up
ABCA13	134.782	-1.29332	0.192028	1.64e-11	4.38e-10	down
COL4A3	84.4605	2.38874	0.354696	1.64e-11	4.39e-10	up
SERPINE1	973.984	-1.01612	0.151025	1.72e-11	4.59e-10	down
CTDSP2	5439.07	0.691364	0.102787	1.74e-11	4.64e-10	up
HAS2	24.0414	2.79222	0.415224	1.76e-11	4.69e-10	up
OSGIN1	149.84	-1.70402	0.253431	1.77e-11	4.7e-10	down
UHRF1BP1	3275.23	0.806374	0.119929	1.77e-11	4.7e-10	up
GNE	2165.21	0.542388	0.0807005	1.8e-11	4.79e-10	up
PPP2R5D	3960.79	-0.458706	0.0682604	1.82e-11	4.82e-10	down
CCM2L	82.8757	3.25999	0.485184	1.83e-11	4.84e-10	up
SPRY2	62.9855	1.86679	0.278129	1.92e-11	5.07e-10	up
FAM95C	362.574	-1.29215	0.192517	1.92e-11	5.07e-10	down
MGAT1	2118.95	-0.794653	0.118446	1.96e-11	5.16e-10	down
AP4B1	1538.1	-0.506974	0.0755914	1.99e-11	5.24e-10	down
AOC3	52.7253	-1.68979	0.252036	2.02e-11	5.31e-10	down
PDLIM3	400.004	0.692037	0.103238	2.04e-11	5.35e-10	up
DOK3	219.665	-2.34504	0.349861	2.05e-11	5.36e-10	down
HOOK1	709.593	0.822894	0.122828	2.09e-11	5.47e-10	up
IRS1	281.556	0.969056	0.144699	2.13e-11	5.56e-10	up
AK092048	118.119	-1.72135	0.257038	2.13e-11	5.56e-10	down
PNMT	64.5491	2.20363	0.329336	2.21e-11	5.77e-10	up
RNF19A	1316.67	0.808836	0.120882	2.22e-11	5.77e-10	up
SPARCL1	22.3727	3.60956	0.539635	2.25e-11	5.85e-10	up
AK094818	160.53	-1.13884	0.170316	2.28e-11	5.93e-10	down
FOXO1	268.203	1.09892	0.164365	2.3e-11	5.96e-10	up
MLLT11	1786.42	-0.701125	0.104889	2.32e-11	6.01e-10	down
MRPL17	4628.02	-0.665916	0.0996403	2.34e-11	6.05e-10	down
TTC1	3287.53	-0.740315	0.110806	2.37e-11	6.13e-10	down
IGF1R	4135.88	-0.856478	0.128398	2.55e-11	6.58e-10	down
NDUFS4	1585.02	-0.608567	0.0912567	2.58e-11	6.66e-10	down
VPS25	4057.44	-0.480692	0.0720973	2.61e-11	6.71e-10	down
PRDM5	168.967	0.930545	0.139681	2.7e-11	6.95e-10	up
GNPDA1	5057.67	-0.595283	0.089407	2.77e-11	7.13e-10	down
FAM173B	868.884	-0.535607	0.0804652	2.81e-11	7.2e-10	down
WDR55	2314.12	-0.673758	0.101261	2.86e-11	7.33e-10	down
TIMM44	2918.98	-0.843272	0.126749	2.87e-11	7.35e-10	down
CA2	212.089	-1.18847	0.178723	2.93e-11	7.5e-10	down
CCDC80	717.1	0.970256	0.145982	3e-11	7.67e-10	up
LYPD3	257.247	-1.42316	0.214223	3.07e-11	7.82e-10	down
BDH1	805.993	-0.680684	0.102466	3.07e-11	7.83e-10	down
MYOF	8624.69	-0.860843	0.129708	3.21e-11	8.16e-10	down
UQCR11	2882.93	-0.875823	0.131989	3.23e-11	8.21e-10	down
NPM1	142626	-0.653811	0.0985476	3.26e-11	8.26e-10	down
SH2D3A	671.386	-1.17496	0.177101	3.26e-11	8.26e-10	down
RER1	4427.06	-0.503432	0.0759092	3.31e-11	8.38e-10	down
RPS15	16878.3	-1.16833	0.176212	3.35e-11	8.47e-10	down
NAV2	2073.49	0.735187	0.111032	3.56e-11	8.99e-10	up
KIAA0355	515.186	0.808407	0.122094	3.56e-11	8.99e-10	up
NUPR1	67.958	2.70483	0.408611	3.6e-11	9.08e-10	up
C19orf33	1795.28	-1.42932	0.215973	3.64e-11	9.16e-10	down
GYG2	203.234	2.46049	0.371846	3.67e-11	9.22e-10	up
FAM217B	1521.4	1.01113	0.152849	3.71e-11	9.32e-10	up
TP73	45.5716	2.1615	0.326772	3.72e-11	9.33e-10	up
NRP2	487.064	-0.910109	0.137591	3.73e-11	9.33e-10	down
UNC13B	3724.53	-0.547585	0.082786	3.73e-11	9.33e-10	down
TAOK3	829.657	-0.544065	0.0823152	3.86e-11	9.63e-10	down
MEGF6	1613.89	-1.1354	0.171801	3.87e-11	9.67e-10	down
FHL2	3108.59	0.956481	0.144774	3.93e-11	9.78e-10	up
TMEM214	3668.06	-0.66177	0.100167	3.93e-11	9.78e-10	down
DAAM1	538.956	0.75179	0.113795	3.93e-11	9.78e-10	up
PAR-SN	44.5733	2.09079	0.316478	3.94e-11	9.78e-10	up
PSMA5	11818.2	-0.548573	0.0830965	4.07e-11	1.01e-09	down
PDE1A	3301.35	0.930936	0.141047	4.11e-11	1.02e-09	up
HNRNPAB	17627.9	-0.654304	0.0991415	4.12e-11	1.02e-09	down
MRPS17	2626.68	-0.639739	0.0969351	4.12e-11	1.02e-09	down
SASH1	264.483	0.742625	0.112561	4.18e-11	1.03e-09	up
AR	1277.95	0.740014	0.112244	4.31e-11	1.06e-09	up
OSBPL10	3544.16	0.706477	0.107173	4.34e-11	1.07e-09	up
PABPC4L	200.812	1.25662	0.190663	4.37e-11	1.08e-09	up
CELSR3	848.566	0.839352	0.127374	4.41e-11	1.08e-09	up
TLR4	110.693	2.2096	0.335339	4.42e-11	1.09e-09	up
AP3B2	78.6606	1.61844	0.245771	4.54e-11	1.11e-09	up
EPB41L4A-AS1	1049.21	-0.66642	0.101248	4.64e-11	1.14e-09	down
TNFRSF25	161.337	1.27755	0.194328	4.89e-11	1.2e-09	up
KIF5C	32.443	2.2531	0.342911	5.01e-11	1.22e-09	up
NARF	1620.55	-0.721366	0.109856	5.15e-11	1.26e-09	down
LOC100144602	90.9157	1.26368	0.192446	5.15e-11	1.26e-09	up
GSE1	6644.79	0.56636	0.0862787	5.23e-11	1.27e-09	up
FNBP1L	1299.52	0.652879	0.0994648	5.24e-11	1.27e-09	up
PHF15	5826.23	-1.0712	0.163313	5.41e-11	1.31e-09	down
CDC14A	295.469	0.872446	0.133032	5.45e-11	1.32e-09	up
EBLN2	58.1078	1.4963	0.228256	5.55e-11	1.34e-09	up
C22orf46	158.019	1.04795	0.159972	5.72e-11	1.38e-09	up
SESN2	1050.28	1.27223	0.194396	5.97e-11	1.44e-09	up
SNRPC	7316.37	-0.57503	0.0878798	6.01e-11	1.45e-09	down
HECW1	421.591	1.36846	0.209222	6.12e-11	1.48e-09	up
KAT6B	1376.31	0.702952	0.107516	6.23e-11	1.5e-09	up
PFDN6	3654.75	-0.628715	0.0962708	6.55e-11	1.57e-09	down
MAPK10	22.1014	3.12329	0.478547	6.73e-11	1.62e-09	up
FAH	1607.39	-0.595617	0.0912668	6.75e-11	1.62e-09	down
YIPF5	2548.72	-0.580506	0.0889534	6.76e-11	1.62e-09	down
DNAJC22	662.039	1.24884	0.191611	7.14e-11	1.71e-09	up
PIEZO2	193.42	2.04409	0.313686	7.2e-11	1.72e-09	up
FBXO27	497.196	1.31483	0.201812	7.26e-11	1.73e-09	up
ASAP1	3319.63	0.871221	0.133803	7.45e-11	1.78e-09	up
SGK1	7118.05	-0.548363	0.0842369	7.53e-11	1.79e-09	down
LOC644656	289.982	-1.03883	0.15966	7.69e-11	1.83e-09	down
COLGALT2	25.3034	2.30575	0.354469	7.78e-11	1.85e-09	up
FZD4	661.074	1.42243	0.218916	8.16e-11	1.94e-09	up
HIST1H2BK	1922.88	0.814596	0.125412	8.28e-11	1.96e-09	up
CCDC94	968.884	-1.1564	0.178102	8.42e-11	1.99e-09	down
CD8A	18.7966	3.64314	0.561114	8.43e-11	2e-09	up
SSR2	10483.9	-0.481032	0.0741076	8.53e-11	2.02e-09	down
SFXN3	4565.44	-0.415951	0.0640846	8.55e-11	2.02e-09	down
AMOTL1	2479.05	0.558372	0.086031	8.56e-11	2.02e-09	up
ZNF860	300.192	0.823353	0.126906	8.71e-11	2.05e-09	up
TPPP3	47.728	2.30232	0.354909	8.75e-11	2.06e-09	up
LAMA2	68.9435	1.55304	0.239434	8.8e-11	2.07e-09	up
HERC4	3956.32	-1.19366	0.184074	8.89e-11	2.09e-09	down
TP53INP2	414.147	1.10185	0.169929	8.92e-11	2.09e-09	up
WWC3	1836.54	0.960895	0.148231	9.03e-11	2.11e-09	up
ALS2CR8	125.155	1.15943	0.17887	9.05e-11	2.12e-09	up
GSTK1	3241.51	-0.750202	0.11579	9.24e-11	2.16e-09	down
SMARCA2	31.1361	-2.01052	0.310367	9.3e-11	2.17e-09	down
PRADC1	1108.69	-0.516122	0.0796968	9.41e-11	2.2e-09	down
GFPT2	863.88	-0.889328	0.137331	9.43e-11	2.2e-09	down
NDE1	1197.43	0.53269	0.0823402	9.84e-11	2.29e-09	up
CFI	183.365	-1.19308	0.18446	9.93e-11	2.31e-09	down
C8orf37	381.752	0.875565	0.135432	1.01e-10	2.35e-09	up
C14orf180	16.3324	4.12248	0.637736	1.02e-10	2.36e-09	up
TRPV1	361.564	-1.15928	0.17937	1.03e-10	2.38e-09	down
CSPG4	218.93	1.62392	0.251468	1.06e-10	2.46e-09	up
MCOLN1	442.607	-1.18714	0.183862	1.07e-10	2.47e-09	down
GBP2	437.163	0.875599	0.135616	1.07e-10	2.47e-09	up
L1CAM	7217.76	1.07539	0.166708	1.11e-10	2.57e-09	up
RARS	8895.37	-0.666515	0.103433	1.16e-10	2.68e-09	down
EBP	5541.45	-0.703886	0.109276	1.18e-10	2.72e-09	down
LOC728613	556.905	-0.58647	0.0910626	1.19e-10	2.74e-09	down
RBM20	731.581	1.10005	0.170824	1.2e-10	2.75e-09	up
KLF6	576.947	0.708231	0.110032	1.22e-10	2.8e-09	up
FAM109B	443.867	-0.635408	0.0987407	1.23e-10	2.82e-09	down
ZNF460	86.767	1.33147	0.206908	1.23e-10	2.82e-09	up
ADRBK2	308.298	0.732421	0.113839	1.24e-10	2.84e-09	up
KLF12	501.807	1.00875	0.156847	1.26e-10	2.88e-09	up
PCID2	9354.12	0.448228	0.0696935	1.26e-10	2.88e-09	up
WWC1	4059.41	-0.684016	0.106432	1.3e-10	2.97e-09	down
XPC	2270.93	0.486337	0.0756787	1.31e-10	2.97e-09	up
LINC00460	18.6881	-4.0201	0.625572	1.31e-10	2.97e-09	down
SGCE	3549.1	0.679529	0.105762	1.32e-10	2.99e-09	up
ANXA5	11594.7	-0.519762	0.0809206	1.34e-10	3.03e-09	down
RSF1	2829.73	0.642502	0.100048	1.35e-10	3.05e-09	up
EIF3I	16071.3	-0.556384	0.0866698	1.37e-10	3.09e-09	down
RAPGEFL1	180.989	-1.32535	0.206496	1.38e-10	3.12e-09	down
PBX1	3309.45	0.747879	0.116527	1.38e-10	3.12e-09	up
PLCD4	78.6006	2.14189	0.333882	1.41e-10	3.17e-09	up
CERKL	97.8875	1.44257	0.22493	1.42e-10	3.2e-09	up
PDZD4	178.014	2.49365	0.38885	1.43e-10	3.21e-09	up
EBNA1BP2	9568.75	-0.831877	0.129726	1.43e-10	3.22e-09	down
NEO1	30.9739	2.05361	0.320326	1.45e-10	3.25e-09	up
AFAP1	3321.04	0.850438	0.132682	1.46e-10	3.27e-09	up
ALG3	4062.79	-0.770275	0.120193	1.47e-10	3.29e-09	down
SPRY1	122.775	1.3703	0.213868	1.48e-10	3.32e-09	up
JUN	299.394	1.23048	0.19223	1.54e-10	3.45e-09	up
RCOR1	6434.51	0.565557	0.0883809	1.56e-10	3.49e-09	up
AK057719	60.3623	-1.71123	0.267552	1.6e-10	3.56e-09	down
TCEANC	122.365	1.32504	0.207191	1.6e-10	3.57e-09	up
HSPB8	1640.26	-1.13884	0.178183	1.64e-10	3.66e-09	down
PPT2	1680.82	-0.536809	0.0839918	1.65e-10	3.66e-09	down
BC034605	59.3687	2.77309	0.434087	1.68e-10	3.73e-09	up
COL8A1	1578.3	1.82919	0.286376	1.69e-10	3.74e-09	up
TRIO	5611.04	-1.14147	0.178752	1.71e-10	3.78e-09	down
ATOX1	1783.53	-0.915637	0.143482	1.75e-10	3.88e-09	down
TMEM55A	378.224	0.750716	0.117696	1.79e-10	3.96e-09	up
HERPUD1	3553.57	1.29013	0.202271	1.79e-10	3.96e-09	up
SESTD1	2183.22	0.826962	0.129739	1.84e-10	4.06e-09	up
CLCC1	2174.18	-0.480766	0.0754348	1.85e-10	4.08e-09	down
LARP1B	1090.34	-0.664863	0.104325	1.85e-10	4.08e-09	down
PSMC3	10974.6	-0.805338	0.12641	1.88e-10	4.14e-09	down
EIF6	9940.33	-0.661111	0.103777	1.88e-10	4.14e-09	down
CACNA2D1	390.064	-1.45258	0.228068	1.9e-10	4.18e-09	down
LGMN	5884.72	-0.537521	0.0844267	1.93e-10	4.23e-09	down
HDDC2	4130.33	-0.466265	0.0732678	1.97e-10	4.31e-09	down
NUP155	7606.93	-0.71458	0.112327	2e-10	4.37e-09	down
DAZAP1	8048	-0.636187	0.100054	2.04e-10	4.46e-09	down
CXCL2	103.835	1.30397	0.205159	2.07e-10	4.52e-09	up
EDEM1	1760.19	0.665188	0.104839	2.23e-10	4.86e-09	up
ITGB8	772.393	0.804203	0.126879	2.32e-10	5.06e-09	up
KLF3	889.279	0.684624	0.108058	2.36e-10	5.14e-09	up
EIF2S3	32086.7	-0.438981	0.0693324	2.43e-10	5.28e-09	down
TBC1D9B	5913.52	-0.758359	0.119792	2.44e-10	5.3e-09	down
EPCAM	2376.2	1.25967	0.198983	2.44e-10	5.3e-09	up
SHOC2	1807.25	0.764932	0.120837	2.45e-10	5.3e-09	up
AIF1L	7320.74	1.10801	0.175084	2.48e-10	5.36e-09	up
IL20RB	71.7484	-1.58817	0.251083	2.53e-10	5.47e-09	down
PPP2R1B	3827.58	0.691782	0.109395	2.55e-10	5.52e-09	up
NALCN	37.9974	-2.16828	0.343058	2.61e-10	5.63e-09	down
ALDH6A1	633.891	1.00491	0.159007	2.62e-10	5.64e-09	up
PITPNC1	740.43	1.21566	0.192414	2.65e-10	5.71e-09	up
AKNA	504.286	1.18462	0.187597	2.71e-10	5.82e-09	up
CORIN	25.0299	-2.60228	0.412266	2.75e-10	5.92e-09	down
RPL27A	53194.1	-0.524278	0.0830812	2.78e-10	5.97e-09	down
MAN1A1	726.9	1.04587	0.165829	2.85e-10	6.11e-09	up
PFN1	39585.5	-0.691874	0.109747	2.9e-10	6.21e-09	down
PPP1R9A	1011.81	0.80534	0.127754	2.9e-10	6.21e-09	up
AX747067	66.5227	-1.81305	0.287613	2.91e-10	6.21e-09	down
C9orf84	161.183	-1.82693	0.289932	2.95e-10	6.31e-09	down
SPATS2L	2874.06	-0.949476	0.150747	3.01e-10	6.41e-09	down
TYSND1	2741.54	-0.778528	0.123611	3.01e-10	6.42e-09	down
CHMP2B	1264.38	0.610543	0.0969869	3.07e-10	6.54e-09	up
MUM1	2422.53	-0.643248	0.102202	3.1e-10	6.59e-09	down
SUCLG2	1190.38	0.771763	0.122636	3.11e-10	6.61e-09	up
PSMD4	10409.8	-0.558669	0.0888386	3.2e-10	6.8e-09	down
LIMD2	41.7589	-2.02424	0.322172	3.32e-10	7.04e-09	down
PLP2	13421.9	-0.788714	0.125585	3.38e-10	7.16e-09	down
FBLIM1	512.188	1.78644	0.284499	3.4e-10	7.2e-09	up
C5orf42	881.066	-0.704314	0.112215	3.46e-10	7.32e-09	down
ZNF34	242.155	0.791549	0.126152	3.51e-10	7.4e-09	up
ATP5G1	7721.04	-0.749799	0.119501	3.51e-10	7.4e-09	down
MTRR	3887.31	-0.924956	0.147419	3.51e-10	7.4e-09	down
MPND	397.141	-1.09095	0.173878	3.51e-10	7.4e-09	down
TCTN3	2625.7	-0.558718	0.0891153	3.62e-10	7.61e-09	down
DPYSL2	2070.1	0.733687	0.117128	3.75e-10	7.89e-09	up
USP14	5722.38	-0.698568	0.111638	3.91e-10	8.21e-09	down
FOXN4	38.7399	2.13343	0.34109	3.98e-10	8.35e-09	up
LPAR1	747.736	2.83388	0.453085	3.98e-10	8.35e-09	up
APOLD1	51.0154	1.88237	0.301086	4.05e-10	8.48e-09	up
MRPL21	3366.93	-0.532499	0.0851931	4.09e-10	8.55e-09	down
SSTR5-AS1	21.6499	2.90623	0.465599	4.32e-10	9.03e-09	up
CFD	267.623	-1.41472	0.226754	4.4e-10	9.19e-09	down
PPP1R3F	140.896	-1.12015	0.179663	4.53e-10	9.43e-09	down
MRPL24	3283.15	-0.444829	0.0713789	4.61e-10	9.59e-09	down
TICAM1	383.47	-1.17123	0.187957	4.62e-10	9.62e-09	down
SLC45A4	519.909	0.980289	0.157352	4.67e-10	9.7e-09	up
ZNF302	530.559	0.650164	0.104438	4.81e-10	9.98e-09	up
TMEM126A	1342.77	-0.635248	0.10208	4.88e-10	1.01e-08	down
POPDC3	412.489	-1.06217	0.170687	4.88e-10	1.01e-08	down
PPP1R3D	293.016	1.1847	0.190477	4.98e-10	1.03e-08	up
EHD4	1365.64	-0.591782	0.0951767	5.04e-10	1.04e-08	down
F2RL3	149.666	-1.22162	0.196488	5.06e-10	1.04e-08	down
TGFB1I1	274.954	1.04674	0.168417	5.13e-10	1.06e-08	up
TYMP	392.335	-1.3955	0.224578	5.17e-10	1.07e-08	down
CYB561D2	910.521	-0.827984	0.133255	5.18e-10	1.07e-08	down
FUT1	368.931	2.10213	0.338339	5.2e-10	1.07e-08	up
ELOVL1	4269.15	-0.743454	0.119755	5.36e-10	1.1e-08	down
RANBP3	2349.09	-0.776401	0.125181	5.57e-10	1.14e-08	down
YPEL2	293.877	1.05915	0.170785	5.59e-10	1.15e-08	up
SFN	3053.23	-1.08162	0.17453	5.74e-10	1.18e-08	down
NUDT16	492.039	-0.599632	0.096768	5.77e-10	1.18e-08	down
HMG20A	731.591	0.648203	0.104662	5.89e-10	1.2e-08	up
FKBP1A	7641.67	-0.442774	0.071494	5.9e-10	1.2e-08	down
WNK4	59.1031	-1.44543	0.233418	5.92e-10	1.21e-08	down
DKK1	185.33	-3.61064	0.583263	6e-10	1.22e-08	down
SRCIN1	465.651	1.52147	0.245838	6.06e-10	1.23e-08	up
NUP210	25607.2	0.60217	0.0973328	6.14e-10	1.25e-08	up
RUFY1	1691.65	-0.554148	0.0896125	6.26e-10	1.27e-08	down
PLCH2	64.8994	2.39509	0.387371	6.29e-10	1.28e-08	up
SRD5A3	611.447	-0.624163	0.100978	6.36e-10	1.29e-08	down
SERPINF2	77.0158	1.65296	0.267474	6.41e-10	1.3e-08	up
CACTIN	1112.19	-1.33406	0.215978	6.54e-10	1.32e-08	down
B3GALNT1	509.162	0.891159	0.14429	6.57e-10	1.33e-08	up
S100A1	73.7538	1.73693	0.281283	6.62e-10	1.34e-08	up
LINC00482	185.99	-1.75039	0.283517	6.66e-10	1.35e-08	down
NDUFA8	4772.72	-0.524075	0.0849146	6.75e-10	1.36e-08	down
SF3B3	24208.5	0.445997	0.0722778	6.8e-10	1.37e-08	up
PSMC5	10283.4	-0.695466	0.112707	6.8e-10	1.37e-08	down
SEC14L4	262.641	0.718195	0.116489	7.03e-10	1.41e-08	up
PSMB2	10187.3	-0.500917	0.0812686	7.11e-10	1.43e-08	down
SNAP25	687.43	1.62968	0.264644	7.37e-10	1.48e-08	up
KLC1	6986.8	0.392911	0.0638085	7.38e-10	1.48e-08	up
SENP3-EIF4A1	78856.3	-0.536851	0.0871955	7.42e-10	1.49e-08	down
PHB	16682.7	-0.541821	0.0880183	7.47e-10	1.5e-08	down
FAM49B	3365.9	0.521684	0.0847529	7.49e-10	1.5e-08	up
N4BP2	708.154	1.14314	0.185734	7.52e-10	1.5e-08	up
FOXP2	767.347	0.830861	0.135054	7.65e-10	1.53e-08	up
MFSD12	3367.44	-1.15416	0.18771	7.81e-10	1.56e-08	down
LRP4	1119.88	0.592115	0.0963414	7.95e-10	1.58e-08	up
TINCR	77.3986	1.51973	0.247425	8.14e-10	1.62e-08	up
EPHA4	264.416	0.800197	0.130279	8.14e-10	1.62e-08	up
C1orf226	553.877	1.58078	0.257516	8.33e-10	1.65e-08	up
DIAPH1	17866.1	-0.534623	0.0870973	8.35e-10	1.66e-08	down
GPC5	1311.8	0.630514	0.102761	8.48e-10	1.68e-08	up
ETV4	147.204	1.8555	0.302504	8.58e-10	1.7e-08	up
PSMC4	6917.18	-0.812568	0.132583	8.86e-10	1.75e-08	down
DANCR	7016.85	-0.67546	0.110255	8.99e-10	1.78e-08	down
SLC6A9	1140.91	0.839402	0.13707	9.13e-10	1.8e-08	up
IL7R	437.221	-4.38614	0.716267	9.15e-10	1.8e-08	down
TRIQK	419.408	1.19066	0.194576	9.4e-10	1.85e-08	up
PIGF	734.305	-0.629264	0.102901	9.64e-10	1.9e-08	down
BOD1	2905.37	-0.538011	0.0879864	9.67e-10	1.9e-08	down
MAPK9	2874.55	-0.481022	0.0786681	9.68e-10	1.9e-08	down
BC067244	1021.5	0.691782	0.113152	9.73e-10	1.91e-08	up
LOC284648	22.5944	3.27939	0.536417	9.75e-10	1.91e-08	up
ARHGAP4	41.6402	2.14163	0.35039	9.83e-10	1.93e-08	up
EIF3K	11141.1	-0.677835	0.110925	9.92e-10	1.94e-08	down
DNAJC12	316.41	-0.906669	0.148413	1e-09	1.96e-08	down
ATP9A	2067.72	0.611543	0.100134	1.01e-09	1.98e-08	up
PSMD13	5878.87	-0.485871	0.0795633	1.02e-09	1.99e-08	down
BAI2	856.059	1.66028	0.271892	1.02e-09	1.99e-08	up
OLFML2A	3042.49	1.10358	0.180766	1.03e-09	2e-08	up
NDUFAB1	4090.99	-0.458892	0.0751829	1.04e-09	2.02e-08	down
BLMH	5042.62	-0.483455	0.0792117	1.04e-09	2.02e-08	down
LYPD6B	100.485	1.17622	0.192737	1.04e-09	2.03e-08	up
C11orf48	2696.36	-0.550781	0.0902737	1.05e-09	2.04e-08	down
TYRP1	16.7173	3.36116	0.550945	1.06e-09	2.05e-08	up
NKD1	467.126	1.64118	0.269174	1.08e-09	2.09e-08	up
LBX2-AS1	198.673	1.02505	0.168144	1.09e-09	2.1e-08	up
IER3	2742.17	1.75348	0.287652	1.09e-09	2.1e-08	up
SLC48A1	1425.94	-0.662502	0.108681	1.09e-09	2.1e-08	down
UBAC1	3464.68	-0.519274	0.0852016	1.1e-09	2.12e-08	down
CYB5R1	1526.25	-0.46544	0.0763711	1.1e-09	2.12e-08	down
GAB1	726.558	0.926824	0.152088	1.1e-09	2.12e-08	up
PPP1R15B	6189.91	0.69057	0.113349	1.11e-09	2.14e-08	up
ABCB6	2433.21	-0.698194	0.114649	1.13e-09	2.17e-08	down
AP2M1	20275	-0.647069	0.106256	1.13e-09	2.17e-08	down
ZNRD1	2017.13	-0.478044	0.0785066	1.13e-09	2.18e-08	down
DDX41	4536.45	-0.688036	0.113023	1.15e-09	2.2e-08	down
DKFZp667P0924	171.64	1.43083	0.235104	1.16e-09	2.22e-08	up
PAX5	16.7973	5.44391	0.894801	1.17e-09	2.24e-08	up
CYB561A3	1826.86	-0.957441	0.157396	1.18e-09	2.26e-08	down
PLCB1	310.178	0.913364	0.150173	1.19e-09	2.27e-08	up
THOC1	2372.18	-0.599813	0.0986368	1.19e-09	2.28e-08	down
MRPL2	2823.49	-0.598839	0.0984781	1.19e-09	2.28e-08	down
RMND5A	3335.38	0.581011	0.0955707	1.21e-09	2.3e-08	up
GPR162	96.9283	1.18871	0.195611	1.23e-09	2.33e-08	up
MUC13	491.775	1.67999	0.276786	1.28e-09	2.44e-08	up
EEF1B2	28907.5	-0.4547	0.0749688	1.32e-09	2.5e-08	down
SPTBN4	39.7358	1.83158	0.30209	1.34e-09	2.53e-08	up
TK2	851.997	0.678262	0.111869	1.34e-09	2.53e-08	up
TAP2	5554.48	-0.738707	0.121883	1.35e-09	2.57e-08	down
NCKAP5	704.164	0.647556	0.106855	1.36e-09	2.57e-08	up
CLPP	1908.62	-1.03101	0.170216	1.39e-09	2.62e-08	down
RELN	55.5054	-8.842	1.46028	1.4e-09	2.65e-08	down
GDAP1	2241.75	0.611808	0.101052	1.41e-09	2.66e-08	up
KATNAL2	423.716	0.837886	0.138421	1.42e-09	2.68e-08	up
SMPD2	1251.29	-0.654537	0.108137	1.42e-09	2.68e-08	down
COL12A1	10536.7	0.582742	0.0962904	1.43e-09	2.69e-08	up
CTTNBP2	751.305	0.614035	0.101465	1.43e-09	2.7e-08	up
ELK3	456.417	0.776321	0.128384	1.48e-09	2.78e-08	up
NIT2	2106.48	-0.541062	0.0895238	1.51e-09	2.83e-08	down
MCTP1	688.099	0.795999	0.131801	1.55e-09	2.9e-08	up
LSM7	1375.35	-0.873416	0.144719	1.59e-09	2.97e-08	down
PFKFB4	975.596	-1.18903	0.197098	1.61e-09	3.02e-08	down
TRAK2	4869.93	0.739401	0.122625	1.64e-09	3.07e-08	up
S100A10	8639.56	-0.789434	0.130946	1.65e-09	3.09e-08	down
PLEKHJ1	1475.12	-0.932556	0.1547	1.66e-09	3.1e-08	down
MVP	787.224	-1.12534	0.18669	1.66e-09	3.1e-08	down
CARS2	3951.6	-0.993518	0.164827	1.66e-09	3.1e-08	down
GTF2H5	870.008	-0.595217	0.0987712	1.68e-09	3.13e-08	down
ARHGAP44	632.342	0.616579	0.102335	1.69e-09	3.14e-08	up
hCPE-R	86.933	1.09826	0.182295	1.69e-09	3.15e-08	up
ARHGAP26	547.802	0.831196	0.137993	1.71e-09	3.17e-08	up
SLC35B2	4338	-0.77362	0.128503	1.74e-09	3.23e-08	down
GPRIN1	1200.25	-0.50489	0.083896	1.77e-09	3.27e-08	down
FLJ23867	192.697	-0.841617	0.139881	1.78e-09	3.3e-08	down
ADAM19	67.7534	1.61761	0.268917	1.8e-09	3.32e-08	up
SLC39A6	4112.09	0.809648	0.134641	1.82e-09	3.36e-08	up
IL7	27.0051	-2.29434	0.381639	1.83e-09	3.39e-08	down
OGDH	8302.4	-0.474996	0.079027	1.85e-09	3.41e-08	down
COPRS	2370.88	-0.569074	0.0947596	1.91e-09	3.52e-08	down
CACNB4	208.225	1.11005	0.184911	1.94e-09	3.57e-08	up
CDKL1	410.276	0.709263	0.118199	1.97e-09	3.62e-08	up
LOC100527964	608.88	-0.67476	0.112492	1.99e-09	3.67e-08	down
JUNB	1716.89	1.87173	0.312085	2e-09	3.68e-08	up
ZBTB34	692.187	0.709133	0.118329	2.06e-09	3.78e-08	up
AGR2	3205.08	4.3193	0.72092	2.08e-09	3.82e-08	up
CTSA	6777.74	-0.542962	0.090716	2.16e-09	3.96e-08	down
GALNT16	77.0402	2.21679	0.37042	2.17e-09	3.97e-08	up
KCNH2	538.556	3.3996	0.568102	2.18e-09	3.98e-08	up
UBA3	1430.19	0.635685	0.10631	2.24e-09	4.09e-08	up
SIAE	766.18	-0.576172	0.0963689	2.25e-09	4.1e-08	down
PRRT3	304.333	1.57183	0.262986	2.27e-09	4.15e-08	up
TNIP1	2722.92	-0.83118	0.139141	2.32e-09	4.23e-08	down
CCAT1	10158.9	0.586874	0.0983792	2.44e-09	4.44e-08	up
SEC23B	2862.03	-0.449559	0.0753645	2.44e-09	4.45e-08	down
DTNA	856.561	0.662917	0.111188	2.49e-09	4.53e-08	up
PEX2	1640.7	0.78952	0.132446	2.51e-09	4.55e-08	up
MRI1	3221.79	-0.575579	0.0965658	2.51e-09	4.56e-08	down
LINC00339	227.365	1.00826	0.169219	2.55e-09	4.62e-08	up
MURC	45.1945	-1.45856	0.244886	2.58e-09	4.68e-08	down
TIMM13	2625.83	-1.39841	0.234815	2.6e-09	4.7e-08	down
F7	129.732	3.94073	0.662154	2.66e-09	4.81e-08	up
GPR37	682.418	1.45865	0.245143	2.68e-09	4.84e-08	up
PDCD4-AS1	302.386	1.24636	0.209575	2.73e-09	4.93e-08	up
LPPR3	14.1026	-3.74917	0.630521	2.75e-09	4.95e-08	down
FLJ16779	291.497	-1.58629	0.266849	2.77e-09	5e-08	down
FNDC3A	3760.52	0.797403	0.134155	2.78e-09	5.01e-08	up
DHDDS	1216.36	-0.445983	0.0750482	2.8e-09	5.05e-08	down
C14orf159	1538.33	0.519706	0.0875781	2.95e-09	5.31e-08	up
ATL1	39.9572	1.70447	0.287237	2.96e-09	5.31e-08	up
C1QBP	22156.2	-0.528418	0.089141	3.07e-09	5.51e-08	down
LARP6	491.587	1.44778	0.244279	3.09e-09	5.54e-08	up
C5orf15	1582.7	-0.650223	0.109769	3.15e-09	5.64e-08	down
NS3BP	87.8647	-1.33736	0.225776	3.15e-09	5.64e-08	down
AP3D1	6649.75	-0.667838	0.112761	3.17e-09	5.67e-08	down
BC016656	30.0389	3.58311	0.605477	3.26e-09	5.83e-08	up
PTP4A1	16445.8	0.573226	0.096879	3.28e-09	5.86e-08	up
LOH11CR1I	987.14	0.908562	0.153601	3.32e-09	5.92e-08	up
MPPED2	319.809	1.80498	0.30518	3.33e-09	5.93e-08	up
ZBTB7A	1070.07	-0.936027	0.158322	3.38e-09	6.01e-08	down
PKM	105435	-0.688628	0.116517	3.42e-09	6.08e-08	down
C22orf34	16.6741	-2.94189	0.497935	3.46e-09	6.15e-08	down
PRUNE2	15.481	3.49951	0.592428	3.48e-09	6.18e-08	up
RPF2	6077.19	-0.608162	0.102958	3.49e-09	6.19e-08	down
SPTB	40.3384	1.78254	0.301822	3.51e-09	6.22e-08	up
BEST1	48.5383	3.59098	0.608155	3.53e-09	6.26e-08	up
NET1	1993.64	0.49497	0.083853	3.57e-09	6.32e-08	up
PTRH2	2252.73	-0.59784	0.101301	3.6e-09	6.37e-08	down
HIF3A	67.8164	1.26758	0.214999	3.73e-09	6.59e-08	up
RRM2B	855.178	0.883866	0.149926	3.74e-09	6.6e-08	up
VASH2	268.854	1.11171	0.188719	3.84e-09	6.78e-08	up
SH3BGRL2	471.745	0.859539	0.145944	3.87e-09	6.83e-08	up
ITGB1BP1	2969.76	-0.596444	0.101277	3.88e-09	6.83e-08	down
NUMB	917.69	0.453108	0.0769808	3.96e-09	6.96e-08	up
MTCH2	9905.54	-0.480122	0.0815765	3.97e-09	6.97e-08	down
PSMC2	8121.79	-0.609659	0.103622	4.02e-09	7.05e-08	down
PA2G4	31300.6	-0.539873	0.0917934	4.07e-09	7.14e-08	down
HDHD1	881.579	0.884738	0.150447	4.08e-09	7.16e-08	up
MYO7A	247.328	1.62513	0.276369	4.1e-09	7.17e-08	up
ELAVL1	5586.04	-0.439348	0.0747759	4.21e-09	7.38e-08	down
TP73-AS1	855.364	0.718562	0.122337	4.26e-09	7.46e-08	up
PROCR	3833.91	-0.738314	0.125759	4.34e-09	7.57e-08	down
CAPNS1	13017.6	-0.452124	0.0770121	4.34e-09	7.57e-08	down
ADH5	5699.68	-0.480763	0.0818963	4.35e-09	7.58e-08	down
SPRED2	454.23	1.03178	0.175867	4.44e-09	7.74e-08	up
MITF	1077.03	0.828217	0.141179	4.45e-09	7.75e-08	up
RASGRP2	38.9026	2.51079	0.428303	4.57e-09	7.95e-08	up
SNAP25-AS1	36.746	2.25402	0.384569	4.6e-09	7.99e-08	up
HMGA1	37885.1	-0.788354	0.134518	4.61e-09	8.01e-08	down
LOC285074	263.443	0.835321	0.142557	4.64e-09	8.05e-08	up
IK	8108.33	-0.593602	0.101306	4.64e-09	8.05e-08	down
SHC4	23.411	2.163	0.369377	4.75e-09	8.22e-08	up
PDE8A	2398.64	0.473716	0.0809196	4.79e-09	8.3e-08	up
JX088243	205.362	-0.960199	0.164266	5.05e-09	8.74e-08	down
BC033943	88.8575	-1.05953	0.181298	5.09e-09	8.8e-08	down
EIF2B3	2390.61	-0.556073	0.0951612	5.11e-09	8.83e-08	down
MCTS1	3414.84	-0.450729	0.0771459	5.14e-09	8.87e-08	down
SH2B3	1370.49	0.948304	0.16238	5.22e-09	9e-08	up
LMCD1	106.46	1.21261	0.207698	5.27e-09	9.08e-08	up
LINC00173	243.407	2.03997	0.349959	5.57e-09	9.59e-08	up
WDR44	1610.7	0.606873	0.104211	5.76e-09	9.91e-08	up
TP63	14.9303	5.2709	0.905678	5.89e-09	1.01e-07	up
RIMS4	1660.08	1.15003	0.197722	6.01e-09	1.03e-07	up
DAPK3	962.077	-1.02977	0.177078	6.05e-09	1.04e-07	down
FOXF2	802.337	-0.604107	0.103885	6.06e-09	1.04e-07	down
NPM3	4516.95	-0.609122	0.104765	6.09e-09	1.04e-07	down
ACTN3	18.4188	2.73398	0.470333	6.14e-09	1.05e-07	up
NTMT1	3887.15	-0.68657	0.118127	6.17e-09	1.05e-07	down
MXRA8	15.5546	2.96901	0.51091	6.2e-09	1.06e-07	up
ADAMTS4	76.1524	1.68187	0.289461	6.23e-09	1.06e-07	up
SLC25A3	41377.4	-0.406997	0.0700571	6.27e-09	1.07e-07	down
B4GALT7	784.458	-0.963228	0.165816	6.28e-09	1.07e-07	down
RRP36	3424.61	-0.640161	0.110208	6.3e-09	1.07e-07	down
TXNL4A	2914.62	-0.416197	0.0716712	6.36e-09	1.08e-07	down
JPH3	522.177	1.21567	0.209368	6.39e-09	1.09e-07	up
PCBP1-AS1	691.477	0.621974	0.107166	6.48e-09	1.1e-07	up
MSRB2	354.919	0.950515	0.163815	6.54e-09	1.11e-07	up
DFFB	792.472	-0.493828	0.0851177	6.56e-09	1.11e-07	down
SNX2	5483.26	0.569192	0.0981202	6.59e-09	1.12e-07	up
GTF3C6	8790.36	-0.572018	0.0986142	6.61e-09	1.12e-07	down
STON1	58.2095	2.41907	0.417131	6.66e-09	1.13e-07	up
C20orf24	1125.48	-0.490205	0.0845546	6.73e-09	1.14e-07	down
L3HYPDH	432.493	-0.711228	0.122734	6.84e-09	1.15e-07	down
GAL	3935.89	-0.689553	0.118997	6.84e-09	1.15e-07	down
LTBP1	1031.88	1.26795	0.218832	6.87e-09	1.16e-07	up
NANS	3594.41	-0.426289	0.0735745	6.87e-09	1.16e-07	down
CREB3L1	231.086	-0.93701	0.161724	6.88e-09	1.16e-07	down
VIM	30517.3	-0.6696	0.115576	6.89e-09	1.16e-07	down
C21orf91	310.625	0.878461	0.15166	6.94e-09	1.17e-07	up
GEMIN6	806.26	-0.523693	0.0904202	6.96e-09	1.17e-07	down
DOCK5	2582.05	0.704236	0.121626	7.03e-09	1.18e-07	up
WRAP53	1474.23	-0.66383	0.114651	7.04e-09	1.18e-07	down
FOXL1	558.548	1.1792	0.203668	7.05e-09	1.18e-07	up
AL832891	340.752	1.45866	0.252138	7.24e-09	1.21e-07	up
NKX3-2	31.671	-1.96577	0.339881	7.31e-09	1.22e-07	down
RBKS	37.3526	1.98765	0.343695	7.33e-09	1.22e-07	up
DGAT2	313.271	-0.767863	0.132788	7.35e-09	1.23e-07	down
MEIS1	995.06	0.709047	0.122698	7.52e-09	1.26e-07	up
HNRNPU-AS1	2413.31	-0.63781	0.110392	7.57e-09	1.26e-07	down
CANX	44528.4	-0.839518	0.145323	7.61e-09	1.27e-07	down
LPIN1	1667.25	-0.55055	0.0953119	7.64e-09	1.27e-07	down
FASTKD3	1484.95	-0.995104	0.172291	7.66e-09	1.27e-07	down
TPP1	4342.71	-0.445403	0.0771347	7.72e-09	1.28e-07	down
KIAA0825	1524.48	0.646381	0.112004	7.88e-09	1.31e-07	up
MTMR12	1664.39	-0.689879	0.119577	7.96e-09	1.32e-07	down
DDRGK1	1341.3	-0.894648	0.155105	8.02e-09	1.33e-07	down
GPR64	39.4135	-2.28226	0.395741	8.07e-09	1.34e-07	down
CHMP4C	786.427	0.562071	0.0974899	8.15e-09	1.35e-07	up
GPSM3	90.9125	1.55635	0.2702	8.41e-09	1.39e-07	up
PRSS8	370.437	2.92104	0.507191	8.45e-09	1.4e-07	up
CNGB1	47.4247	1.954	0.339417	8.56e-09	1.41e-07	up
PTRF	5386.23	-1.03401	0.179709	8.73e-09	1.44e-07	down
PCDH1	121.344	1.3158	0.22877	8.84e-09	1.46e-07	up
DOLK	1097.35	-0.621431	0.108067	8.9e-09	1.47e-07	down
ARHGEF33	81.3389	-1.11161	0.193345	8.96e-09	1.47e-07	down
SNED1	864.208	2.58336	0.44942	9.02e-09	1.48e-07	up
TINAGL1	749.318	-0.984871	0.17138	9.1e-09	1.49e-07	down
COL6A3	24.2305	2.43518	0.423978	9.27e-09	1.52e-07	up
MRPL37	8800.5	-0.3516	0.0612175	9.28e-09	1.52e-07	down
FAM189A2	12.8163	-4.05247	0.705779	9.37e-09	1.54e-07	down
FGFR1	1200.48	0.693533	0.120826	9.47e-09	1.55e-07	up
DNAJC13	3582.59	0.521996	0.0909542	9.52e-09	1.56e-07	up
CR627225	56.9383	-1.80706	0.314879	9.53e-09	1.56e-07	down
BCCIP	5162.55	-0.528029	0.092022	9.58e-09	1.56e-07	down
PLA2R1	118.305	0.994778	0.173376	9.6e-09	1.57e-07	up
SERTAD4-AS1	18.2252	2.63598	0.459684	9.79e-09	1.6e-07	up
RAB34	4366.51	-0.566097	0.0987855	1e-08	1.63e-07	down
RWDD1	4712.63	-0.649682	0.113385	1.01e-08	1.64e-07	down
RNF135	547.205	-0.55497	0.0968584	1.01e-08	1.64e-07	down
ACVR1B	1718.17	0.437496	0.0763877	1.02e-08	1.66e-07	up
MRPS6	1957.62	-0.481528	0.0841144	1.04e-08	1.68e-07	down
WWC2	1706.29	0.628107	0.109746	1.04e-08	1.7e-07	up
PRDX1	45688.7	-0.579842	0.10132	1.05e-08	1.7e-07	down
PIM2	1288.42	-0.525151	0.0917958	1.06e-08	1.72e-07	down
PRR5L	565.699	0.999099	0.174648	1.06e-08	1.72e-07	up
AHSA1	16118.2	-0.515484	0.0901281	1.07e-08	1.73e-07	down
TYRO3	2631.26	-0.608156	0.106349	1.07e-08	1.74e-07	down
CCDC64	219.889	0.976575	0.170792	1.08e-08	1.74e-07	up
NSDHL	1989.52	-0.606365	0.106049	1.08e-08	1.74e-07	down
PDCD4	3479.84	0.840832	0.147084	1.09e-08	1.75e-07	up
GYG1	1938.24	-0.473105	0.0827987	1.1e-08	1.78e-07	down
RNF114	5836.28	0.359233	0.0628723	1.11e-08	1.78e-07	up
CHST4	45.0276	1.41448	0.247734	1.13e-08	1.82e-07	up
PIAS4	529.74	-0.907757	0.159014	1.14e-08	1.83e-07	down
RNASEK-C17orf49	5475.78	-0.669107	0.117223	1.14e-08	1.84e-07	down
ZNF473	1041.56	0.548255	0.0960514	1.14e-08	1.84e-07	up
VLDLR	430.27	1.52349	0.26698	1.15e-08	1.85e-07	up
GRPEL1	3099.95	-0.497122	0.0871395	1.16e-08	1.87e-07	down
SCFD2	855.131	-0.480043	0.0841732	1.18e-08	1.89e-07	down
SNX19	1302.28	0.520352	0.0912526	1.18e-08	1.89e-07	up
KLF4	766.83	0.601521	0.105488	1.18e-08	1.89e-07	up
AK128400	30.0035	-2.08142	0.365047	1.19e-08	1.89e-07	down
SMPDL3B	301.049	1.42459	0.249877	1.19e-08	1.9e-07	up
DARS2	8080.08	0.548067	0.0962117	1.22e-08	1.95e-07	up
SLC39A3	1015.49	-0.786345	0.138108	1.24e-08	1.98e-07	down
ALDH3A1	134.633	1.29976	0.228316	1.25e-08	1.99e-07	up
GRAMD1C	71.6097	1.52585	0.268097	1.26e-08	2.01e-07	up
PPAP2C	2815	-0.710929	0.124917	1.26e-08	2.01e-07	down
CABLES1	1041.89	-0.474444	0.0833692	1.26e-08	2.01e-07	down
SLC4A8	69.2846	1.15547	0.203056	1.27e-08	2.01e-07	up
CAV2	646.592	-1.05076	0.184676	1.27e-08	2.02e-07	down
TOMM22	5231.45	-0.599435	0.105376	1.28e-08	2.03e-07	down
GMPR2	2342.17	-0.613013	0.107791	1.29e-08	2.05e-07	down
MT1E	147.16	-13.0138	2.28878	1.3e-08	2.06e-07	down
PSMD2	20456.6	-0.539582	0.0949062	1.3e-08	2.06e-07	down
FOSL1	449.889	-1.47667	0.25982	1.32e-08	2.09e-07	down
SCML2	992.824	0.608346	0.107049	1.32e-08	2.09e-07	up
CCT7	45257.8	-0.470857	0.0828918	1.34e-08	2.12e-07	down
RFPL1S	126.894	1.34965	0.237627	1.35e-08	2.13e-07	up
PROZ	13.6768	4.06876	0.716663	1.37e-08	2.16e-07	up
MRPL14	3457.14	-0.541493	0.0953884	1.37e-08	2.16e-07	down
RENBP	14.3427	3.20437	0.56466	1.39e-08	2.18e-07	up
GREB1L	657.774	0.883106	0.155651	1.4e-08	2.2e-07	up
AP1S1	4373.24	-0.436684	0.0769749	1.4e-08	2.2e-07	down
PTPN12	3561.89	0.553299	0.0975565	1.41e-08	2.22e-07	up
VGLL4	1567.72	0.646734	0.114056	1.43e-08	2.24e-07	up
ZNF169	265.813	-0.687192	0.121214	1.43e-08	2.25e-07	down
MEIOB	22.9575	2.89386	0.510506	1.44e-08	2.26e-07	up
ITGA10	49.8705	1.53183	0.270247	1.44e-08	2.26e-07	up
MTUS1	3335.57	0.74917	0.132206	1.46e-08	2.28e-07	up
HEY1	1321.06	1.62407	0.286717	1.48e-08	2.31e-07	up
MFAP2	1840.83	1.57116	0.277392	1.48e-08	2.31e-07	up
MTMR7	18.0516	2.80647	0.495582	1.49e-08	2.32e-07	up
UQCRFS1	6195.71	-0.428456	0.0756999	1.51e-08	2.36e-07	down
NDUFB4	3688.18	-0.584097	0.103236	1.53e-08	2.39e-07	down
MYO16	90.3234	1.30472	0.230601	1.53e-08	2.39e-07	up
HDAC3	4085.2	-0.506686	0.0895561	1.53e-08	2.39e-07	down
NME1	9819.84	-0.624579	0.110406	1.54e-08	2.39e-07	down
C1QTNF3	34.3878	-1.83113	0.323757	1.55e-08	2.41e-07	down
FAM105B	2286.93	-0.604599	0.106934	1.57e-08	2.43e-07	down
LEPR	106.074	-1.32192	0.233818	1.57e-08	2.44e-07	down
KLRC2	64.2238	1.65081	0.292	1.57e-08	2.44e-07	up
ARID4A	897.2	0.589476	0.104273	1.57e-08	2.44e-07	up
PNP	9816.36	-0.446369	0.07896	1.58e-08	2.44e-07	down
MYOCD	151.675	1.40852	0.249227	1.59e-08	2.46e-07	up
SP100	695.895	-0.625802	0.110762	1.6e-08	2.48e-07	down
UCHL3	2968.24	-0.444731	0.0787475	1.63e-08	2.51e-07	down
ARFGEF1	2966.33	0.614166	0.108851	1.68e-08	2.59e-07	up
LMAN2	6204.93	-0.753172	0.133525	1.69e-08	2.61e-07	down
PSMF1	3829.77	-0.506632	0.0898231	1.7e-08	2.62e-07	down
AX748212	114.448	1.13106	0.200652	1.73e-08	2.67e-07	up
LOC100216546	347.719	-0.815122	0.144734	1.78e-08	2.74e-07	down
AGMAT	1162.57	0.476384	0.0846187	1.8e-08	2.77e-07	up
HDGFRP2	1604.85	-0.769856	0.136756	1.81e-08	2.78e-07	down
BBX	4234.37	0.725241	0.128863	1.82e-08	2.8e-07	up
GNAS	48451.5	0.577361	0.102636	1.85e-08	2.84e-07	up
AKT3	1768.92	0.713324	0.126824	1.86e-08	2.85e-07	up
NHP2	6604.72	-0.647207	0.115077	1.86e-08	2.86e-07	down
LOC100288181	98.2345	1.19485	0.212457	1.87e-08	2.86e-07	up
SPOCK2	318.826	1.09003	0.19384	1.87e-08	2.87e-07	up
SSPO	74.1041	2.49416	0.443586	1.88e-08	2.87e-07	up
DYRK2	1249.11	0.685278	0.121947	1.92e-08	2.93e-07	up
GSN	1280.73	1.17927	0.209891	1.93e-08	2.94e-07	up
SNHG6	2540.33	-0.397659	0.0707928	1.94e-08	2.96e-07	down
MDC1	5582.84	0.301761	0.0537792	2.01e-08	3.06e-07	up
COPS7A	2475.28	-0.451152	0.0804159	2.02e-08	3.08e-07	down
OXCT1	11268	-0.560405	0.0999132	2.04e-08	3.1e-07	down
FAM63B	156.554	1.18072	0.210685	2.09e-08	3.18e-07	up
TIMP1	6556.05	-0.726863	0.129711	2.1e-08	3.19e-07	down
FAIM2	16.3382	3.0124	0.537692	2.11e-08	3.21e-07	up
ATP5G3	9046.38	-0.483542	0.0863498	2.15e-08	3.26e-07	down
SLC27A2	1261.15	-0.581178	0.103818	2.17e-08	3.29e-07	down
HK2	5932.32	-0.601369	0.107429	2.17e-08	3.29e-07	down
ZNF362	541.645	0.846497	0.151244	2.18e-08	3.3e-07	up
SAAL1	2182.67	-0.45286	0.0809223	2.19e-08	3.31e-07	down
C8orf33	10168.4	0.572304	0.102277	2.2e-08	3.32e-07	up
WDR46	5494.66	-0.695355	0.124331	2.23e-08	3.38e-07	down
CCDC122	27.7729	1.79515	0.32102	2.24e-08	3.39e-07	up
PSAT1	14067.8	0.710231	0.127025	2.25e-08	3.4e-07	up
COX7A2L	2576.11	-0.365282	0.0653371	2.26e-08	3.41e-07	down
NES	2319.28	0.888052	0.158897	2.29e-08	3.44e-07	up
SP110	585.535	-0.573187	0.10259	2.31e-08	3.47e-07	down
C12orf45	1227.72	-0.680264	0.121832	2.36e-08	3.54e-07	down
TOMM7	5889.26	-0.645258	0.11557	2.36e-08	3.55e-07	down
HSPA9	56160.4	-0.457306	0.081935	2.39e-08	3.58e-07	down
PTGS2	500.773	0.968809	0.173622	2.41e-08	3.61e-07	up
TIMM10	2069.2	-0.57748	0.103494	2.41e-08	3.61e-07	down
KRT17	542.348	2.5881	0.464035	2.44e-08	3.66e-07	up
MRPL11	4946	-0.547143	0.0981169	2.45e-08	3.68e-07	down
CHD6	2480.63	0.489929	0.0878664	2.46e-08	3.69e-07	up
CTSH	37.2656	1.91327	0.343174	2.47e-08	3.7e-07	up
LINC00574	25.7711	2.06538	0.370471	2.48e-08	3.7e-07	up
NUDT2	951.784	-0.545457	0.0979014	2.53e-08	3.77e-07	down
ATXN1	364.237	0.630094	0.113145	2.56e-08	3.82e-07	up
AMTN	374.395	-1.4279	0.25641	2.56e-08	3.82e-07	down
RPS23	42601.6	-0.615951	0.110733	2.66e-08	3.96e-07	down
LRRC37A6P	61.9369	1.2284	0.220839	2.66e-08	3.96e-07	up
MRRF	3696.09	-0.479816	0.0862755	2.68e-08	3.98e-07	down
VDAC2	11709.5	-0.382315	0.0687623	2.7e-08	4.01e-07	down
MYLK3	943.467	3.39955	0.611512	2.71e-08	4.02e-07	up
BC043356	63.8202	5.05621	0.909735	2.73e-08	4.05e-07	up
FGF21	43.9082	3.58547	0.645229	2.75e-08	4.07e-07	up
SNAI2	550.409	1.13834	0.204979	2.8e-08	4.15e-07	up
ANK2	410.251	0.874471	0.157557	2.85e-08	4.23e-07	up
FMNL2	2018.6	0.631758	0.113857	2.88e-08	4.26e-07	up
RAPGEF4	26.4266	2.02469	0.364914	2.88e-08	4.26e-07	up
LOC100506190	1515.01	1.06385	0.191774	2.9e-08	4.29e-07	up
NSA2	8287.19	-0.488446	0.0880883	2.94e-08	4.34e-07	down
ALDH2	907.262	0.893336	0.161111	2.94e-08	4.34e-07	up
ST8SIA5	13.7834	-3.08809	0.557001	2.95e-08	4.36e-07	down
COQ3	1465.59	-0.639168	0.115295	2.96e-08	4.36e-07	down
PSMC1	13630.8	-0.66245	0.119499	2.96e-08	4.37e-07	down
BCS1L	2869.24	-0.786483	0.141885	2.97e-08	4.37e-07	down
AK055890	13.7056	3.80132	0.686343	3.05e-08	4.49e-07	up
FBXL16	811.583	0.776846	0.140273	3.06e-08	4.49e-07	up
ANXA2	59922.9	-0.757246	0.136755	3.07e-08	4.51e-07	down
ETF1	17429	-0.592505	0.10702	3.09e-08	4.53e-07	down
PERP	9849.84	-0.894075	0.161539	3.12e-08	4.57e-07	down
ZBTB39	865.489	0.545873	0.0987047	3.2e-08	4.68e-07	up
YEATS2	2300.3	0.441563	0.0798543	3.21e-08	4.7e-07	up
VARS	12684.7	-0.634463	0.114758	3.23e-08	4.72e-07	down
AIFM2	1454.3	-0.729649	0.132038	3.28e-08	4.79e-07	down
BZRAP1	11.849	-4.20735	0.762336	3.41e-08	4.98e-07	down
TNFAIP8	589.709	0.553568	0.10034	3.45e-08	5.04e-07	up
SSU72	5956.49	-0.500706	0.0907838	3.48e-08	5.08e-07	down
PTHLH	40.9448	-1.55981	0.282896	3.51e-08	5.12e-07	down
ELF2	1231.04	0.499192	0.0905649	3.55e-08	5.17e-07	up
TRIM10	127.583	1.14832	0.208441	3.61e-08	5.25e-07	up
SETD4	498.863	-0.503299	0.0913598	3.61e-08	5.25e-07	down
FCHSD2	1503.6	0.433781	0.0787609	3.64e-08	5.29e-07	up
ETNK2	686.477	0.990464	0.179857	3.65e-08	5.31e-07	up
DKFZp686G1344	48.8236	1.51321	0.274875	3.69e-08	5.36e-07	up
CHCHD10	3036.92	-0.766651	0.139273	3.7e-08	5.37e-07	down
NDUFS3	5701.15	-0.380317	0.0691197	3.75e-08	5.44e-07	down
HIST4H4	40.9493	1.48832	0.270508	3.76e-08	5.44e-07	up
RTTN	1120.12	0.49567	0.0901005	3.77e-08	5.46e-07	up
CDH13	213.25	-2.99256	0.543983	3.77e-08	5.46e-07	down
DND1	37.9788	-1.4918	0.27118	3.77e-08	5.46e-07	down
SAMM50	5064.27	-0.42488	0.0772953	3.87e-08	5.59e-07	down
TKT	48561.7	-0.748172	0.136116	3.87e-08	5.59e-07	down
GABRE	2971.65	-0.5325	0.0969205	3.92e-08	5.66e-07	down
UBE2M	4006.33	-0.550108	0.100138	3.94e-08	5.68e-07	down
PADI3	68.0502	1.19266	0.217116	3.95e-08	5.69e-07	up
COA6	1895.74	-0.988837	0.180017	3.95e-08	5.69e-07	down
RNF217	589.185	0.586144	0.106747	4e-08	5.75e-07	up
SALL4	1468.4	0.564134	0.102739	4e-08	5.75e-07	up
SLC20A1	3534.93	0.481303	0.0876618	4.01e-08	5.76e-07	up
EDIL3	57.4695	1.91047	0.347977	4.01e-08	5.76e-07	up
STRA13	2328.23	-0.967177	0.176197	4.04e-08	5.79e-07	down
ALDOA	56892.5	-0.920546	0.167742	4.07e-08	5.83e-07	down
NLRP1	2360.78	-0.724663	0.132054	4.07e-08	5.84e-07	down
TET1	12.3112	-4.61122	0.840338	4.08e-08	5.84e-07	down
LOC149134	23.1758	-3.19594	0.582953	4.2e-08	6.01e-07	down
SPHK1	633.79	-1.45852	0.2663	4.33e-08	6.19e-07	down
CLCF1	271.107	-0.969069	0.177023	4.39e-08	6.28e-07	down
LOC339535	33.081	-8.08451	1.47714	4.42e-08	6.32e-07	down
ZMYND8	2433.08	0.707319	0.12926	4.45e-08	6.35e-07	up
C4orf36	40.7597	1.41235	0.258209	4.51e-08	6.43e-07	up
PDK4	269.272	1.05862	0.193555	4.52e-08	6.44e-07	up
B4GALNT1	1032.54	-0.709549	0.129751	4.54e-08	6.46e-07	down
MANBAL	1869.84	-0.384129	0.0702682	4.59e-08	6.53e-07	down
KDM4B	717.352	-0.888065	0.16247	4.6e-08	6.54e-07	down
RPL32P3	1258.46	-0.525267	0.096139	4.67e-08	6.63e-07	down
LOC100507424	74.6981	-1.24283	0.227502	4.68e-08	6.65e-07	down
LOC100129034	1479.51	-0.558805	0.102311	4.71e-08	6.69e-07	down
HAS2-AS1	16.9319	2.76956	0.507614	4.87e-08	6.91e-07	up
HEMK1	720.175	-0.542202	0.0993824	4.88e-08	6.91e-07	down
R3HDM4	1692.56	-0.877845	0.160927	4.9e-08	6.94e-07	down
KCNU1	216.265	1.89722	0.347806	4.9e-08	6.94e-07	up
DLL4	28.3558	1.73027	0.317306	4.95e-08	7e-07	up
TTC25	46.1609	1.50135	0.27535	4.97e-08	7.02e-07	up
AK127183	85.7508	1.17276	0.215091	4.97e-08	7.02e-07	up
PRRT2	73.6239	2.0397	0.374292	5.05e-08	7.13e-07	up
PKIA	285.436	0.952728	0.174857	5.08e-08	7.16e-07	up
FLAD1	3391.48	-0.562021	0.103155	5.08e-08	7.17e-07	down
HCFC1R1	1867.04	-0.73383	0.134699	5.1e-08	7.18e-07	down
SIAH1	761.034	0.454311	0.0833954	5.1e-08	7.18e-07	up
CCDC112	782.867	-0.538136	0.0988042	5.14e-08	7.23e-07	down
DDX1	10203.5	-0.485949	0.0892399	5.17e-08	7.26e-07	down
MC1R	304.785	-0.909516	0.167027	5.17e-08	7.26e-07	down
C19orf57	94.5152	1.0675	0.196053	5.18e-08	7.27e-07	up
LOC100505912	11.094	-4.1288	0.758336	5.19e-08	7.29e-07	down
SORT1	4398.14	0.695966	0.127876	5.25e-08	7.36e-07	up
COL9A2	32.3294	1.81812	0.334191	5.32e-08	7.45e-07	up
VCP	24159.4	-0.617685	0.113553	5.34e-08	7.48e-07	down
GLRX3	5002.35	-0.495	0.0910498	5.43e-08	7.6e-07	down
IGFBP6	1278.49	-0.949196	0.17467	5.5e-08	7.69e-07	down
TMCO6	1479.31	-0.532321	0.0979592	5.51e-08	7.69e-07	down
ISOC2	1818.49	-0.98442	0.181249	5.59e-08	7.81e-07	down
SETD5-AS1	926.905	0.480371	0.088448	5.6e-08	7.81e-07	up
LDLRAP1	714.57	-0.576517	0.106153	5.6e-08	7.81e-07	down
FH	11572.7	-0.441648	0.0813727	5.72e-08	7.96e-07	down
KLHL4	138.789	-2.02093	0.372479	5.78e-08	8.04e-07	down
GBP1	255.009	0.742245	0.136859	5.85e-08	8.14e-07	up
CHCHD3	6171.65	-0.468622	0.0864127	5.86e-08	8.15e-07	down
HCCS	3964.65	-0.482693	0.089023	5.89e-08	8.18e-07	down
SYNPO	3690.05	-0.483418	0.0891578	5.89e-08	8.18e-07	down
FTSJ3	8739.11	-0.624015	0.115096	5.9e-08	8.19e-07	down
WARS	16101.4	0.52097	0.0961367	5.99e-08	8.31e-07	up
OSGEP	1991.29	-0.393344	0.0726181	6.07e-08	8.42e-07	down
SARDH	58.5839	2.0209	0.373255	6.15e-08	8.52e-07	up
CD101	26.3486	-1.8979	0.350626	6.2e-08	8.58e-07	down
RNF181	2067.13	-0.600628	0.110965	6.21e-08	8.58e-07	down
SNN	639.898	0.784602	0.145016	6.29e-08	8.69e-07	up
TOR3A	4618.67	-0.37627	0.069559	6.33e-08	8.74e-07	down
CCNA1	190.772	1.31278	0.242795	6.41e-08	8.85e-07	up
ZNF488	185.512	-0.794785	0.14706	6.5e-08	8.97e-07	down
CLGN	813.416	0.879535	0.162772	6.54e-08	9.01e-07	up
THTPA	849.134	-0.57445	0.106345	6.6e-08	9.09e-07	down
ARPC1A	6344.23	-0.427583	0.0791627	6.62e-08	9.11e-07	down
UBAC2	3735.05	-0.309052	0.0572453	6.71e-08	9.23e-07	down
RTN2	287.947	1.18393	0.219341	6.75e-08	9.28e-07	up
MGAT4B	5547.77	-0.535372	0.0992077	6.8e-08	9.34e-07	down
ESYT2	3359.55	-0.366947	0.0680813	7.05e-08	9.68e-07	down
CALY	145.359	2.35707	0.437404	7.09e-08	9.73e-07	up
CGB8	44.1561	-3.19123	0.59222	7.1e-08	9.74e-07	down
LINC00478	417.457	0.735874	0.136566	7.11e-08	9.74e-07	up
KIF13B	522.413	0.877151	0.162848	7.19e-08	9.84e-07	up
WDR27	1184.51	0.582023	0.108057	7.19e-08	9.84e-07	up
NOL9	1862.68	0.56764	0.105394	7.21e-08	9.86e-07	up
STXBP5L	15.6597	2.56756	0.476798	7.24e-08	9.9e-07	up
MSRB1	1396.35	-0.715034	0.132796	7.27e-08	9.92e-07	down
NDUFA2	2331.37	-0.805659	0.149694	7.37e-08	1.01e-06	down
DESI1	5662.68	-0.427204	0.0793978	7.43e-08	1.01e-06	down
BYSL	3223.78	-0.732313	0.136142	7.49e-08	1.02e-06	down
TTC21B	938.581	0.599096	0.111426	7.59e-08	1.03e-06	up
MAML2	81.1732	1.15181	0.214228	7.59e-08	1.03e-06	up
RNF169	2270.31	0.520851	0.0969109	7.68e-08	1.04e-06	up
PLAG1	879.184	0.864915	0.160935	7.69e-08	1.04e-06	up
RPL14	49646.4	-0.566573	0.10546	7.77e-08	1.06e-06	down
SLC3A2	17925.9	0.421414	0.0784551	7.81e-08	1.06e-06	up
RAD9B	29.1123	1.95503	0.363984	7.82e-08	1.06e-06	up
SLC25A11	4518.76	-0.60543	0.112744	7.88e-08	1.07e-06	down
AGAP2	37.9766	1.64887	0.307085	7.9e-08	1.07e-06	up
NCALD	78.9824	1.62374	0.302415	7.91e-08	1.07e-06	up
MED16	585.857	-1.45206	0.270484	7.94e-08	1.08e-06	down
CCDC15	122.378	1.0118	0.188484	7.96e-08	1.08e-06	up
LGR6	52.6716	1.60804	0.299558	7.96e-08	1.08e-06	up
FAM114A2	559.793	-0.59633	0.111091	7.96e-08	1.08e-06	down
KALRN	105.158	1.0115	0.188438	7.97e-08	1.08e-06	up
NCLN	4511.16	-1.31581	0.24514	7.98e-08	1.08e-06	down
MAPKBP1	864.674	-0.561304	0.104594	8.03e-08	1.08e-06	down
SLC37A1	489.2	-0.880628	0.164143	8.09e-08	1.09e-06	down
ROR2	1514.15	0.798333	0.148835	8.15e-08	1.1e-06	up
KIAA0922	1306.17	0.377396	0.0703899	8.25e-08	1.11e-06	up
TSPAN7	15.7696	-3.54924	0.662124	8.3e-08	1.12e-06	down
RBM4	1202.25	-0.428426	0.0799944	8.52e-08	1.14e-06	down
CAMKV	17.0404	3.19733	0.597011	8.53e-08	1.15e-06	up
ARL4C	178.609	0.948959	0.177243	8.6e-08	1.15e-06	up
TBCA	4503.19	-0.504836	0.0943111	8.66e-08	1.16e-06	down
ZNF259	2736.86	-0.527091	0.0984975	8.73e-08	1.17e-06	down
IDS	1629.16	-0.680069	0.12709	8.74e-08	1.17e-06	down
NOL12	463.352	-0.834325	0.155928	8.76e-08	1.17e-06	down
MEOX1	135.424	1.91776	0.358421	8.77e-08	1.17e-06	up
PQBP1	4085.56	-0.749844	0.140178	8.83e-08	1.18e-06	down
TMEM130	13.5131	2.8455	0.53199	8.85e-08	1.18e-06	up
IGFBP3	692.509	1.23108	0.230308	9.02e-08	1.2e-06	up
AKR1C1	38.265	-2.25191	0.421338	9.06e-08	1.21e-06	down
THNSL1	440.192	0.649905	0.12167	9.22e-08	1.23e-06	up
ZNF738	86.2145	-12.235	2.29093	9.26e-08	1.23e-06	down
MROH1	365.718	0.952677	0.178415	9.31e-08	1.24e-06	up
WEE1	2379.35	0.474882	0.0889365	9.32e-08	1.24e-06	up
LACTB2	815.666	0.536131	0.100415	9.34e-08	1.24e-06	up
SCN2A	30.0993	1.73714	0.325496	9.45e-08	1.26e-06	up
AX746750	123.041	-0.942589	0.176626	9.47e-08	1.26e-06	down
TRAF5	1116.98	0.745773	0.139793	9.56e-08	1.27e-06	up
FEN1	11865.8	-0.576239	0.108037	9.62e-08	1.28e-06	down
EGFEM1P	26.4641	1.88904	0.354366	9.78e-08	1.3e-06	up
DNAH17	281.204	0.960971	0.180335	9.89e-08	1.31e-06	up
MAD2L1BP	1715.42	-0.444673	0.0834616	9.94e-08	1.31e-06	down
TMEM5	1075.47	-0.729644	0.136949	9.94e-08	1.31e-06	down
NDRG3	3493.89	-0.485811	0.0912268	1.01e-07	1.33e-06	down
PDGFRL	633.486	1.29411	0.243138	1.02e-07	1.35e-06	up
MPDU1	4314.58	-0.736554	0.138393	1.03e-07	1.35e-06	down
ITGAE	1207.95	-0.43103	0.0809963	1.03e-07	1.36e-06	down
NAT9	1387.5	-0.552366	0.103803	1.03e-07	1.36e-06	down
TUBA1C	43599.4	-0.642327	0.120712	1.03e-07	1.36e-06	down
OSGIN2	1466.45	0.657761	0.123634	1.04e-07	1.36e-06	up
ANKRD16	253.671	-0.75918	0.142751	1.05e-07	1.38e-06	down
IRF2BP2	3794.35	0.46679	0.0877844	1.05e-07	1.38e-06	up
ACTA2	50.4419	1.45028	0.272756	1.05e-07	1.39e-06	up
DCLK2	130.268	-1.16226	0.218608	1.06e-07	1.39e-06	down
NDUFV3	1576.47	-0.408287	0.0768251	1.07e-07	1.4e-06	down
CAMK1D	357.727	0.994525	0.187148	1.07e-07	1.41e-06	up
SLC12A7	1589.9	-0.853041	0.160538	1.07e-07	1.41e-06	down
SLC25A4	1793.68	-0.387791	0.0729946	1.08e-07	1.42e-06	down
PUM1	5292.61	0.56878	0.107064	1.08e-07	1.42e-06	up
CCL5	26.3625	1.9145	0.360434	1.09e-07	1.42e-06	up
LPCAT1	10996.1	-0.549764	0.103569	1.11e-07	1.45e-06	down
NUDT22	961.511	-0.925423	0.174379	1.11e-07	1.46e-06	down
ZNF589	1087.42	-0.446153	0.0840864	1.12e-07	1.46e-06	down
FAM110B	113.419	0.845366	0.159348	1.13e-07	1.47e-06	up
FAM221A	13.2017	-3.47821	0.655737	1.13e-07	1.48e-06	down
ZNF423	18.4671	2.31404	0.436336	1.14e-07	1.48e-06	up
MLLT4	1470.19	0.552608	0.10426	1.16e-07	1.51e-06	up
ABCA1	186.762	1.13837	0.214803	1.16e-07	1.51e-06	up
NCS1	4173.99	-0.501784	0.0946999	1.17e-07	1.52e-06	down
SPCS1	4255.36	-0.447461	0.084457	1.17e-07	1.52e-06	down
IL6R	613.303	-0.554783	0.104763	1.19e-07	1.54e-06	down
TRADD	401.287	-0.647262	0.122239	1.19e-07	1.55e-06	down
FLRT1	11.9094	4.50501	0.85082	1.19e-07	1.55e-06	up
LYRM4	1410.05	-0.461039	0.0870761	1.19e-07	1.55e-06	down
DENND1A	1774.45	0.36077	0.0681423	1.19e-07	1.55e-06	up
NT5M	149.37	1.44871	0.273682	1.2e-07	1.56e-06	up
FRMPD2	114.721	2.21177	0.417864	1.2e-07	1.56e-06	up
FMR1	2862.75	0.629341	0.11891	1.21e-07	1.56e-06	up
TMEM14C	5276.97	-0.349032	0.0659695	1.22e-07	1.57e-06	down
BTBD6	3218.93	-0.569257	0.107597	1.22e-07	1.58e-06	down
LAMTOR1	2749.57	-0.583347	0.110281	1.23e-07	1.58e-06	down
ARHGEF7	4041.52	0.440084	0.0832112	1.23e-07	1.59e-06	up
POLH	1066.55	-0.462487	0.0874605	1.24e-07	1.6e-06	down
MICALCL	17.4766	2.29374	0.433891	1.25e-07	1.61e-06	up
C9orf163	65.3079	-1.2508	0.236613	1.25e-07	1.61e-06	down
DPYSL3	1987.21	-0.683772	0.129361	1.25e-07	1.61e-06	down
MPV17	1761.14	-0.631957	0.119575	1.26e-07	1.62e-06	down
PNMA2	13.5433	4.03951	0.764387	1.26e-07	1.62e-06	up
LOC728392	151.493	-1.40383	0.265761	1.28e-07	1.64e-06	down
SOCS3	1416.95	1.47703	0.279672	1.28e-07	1.65e-06	up
PRKAA2	1738.76	0.706364	0.133761	1.29e-07	1.65e-06	up
DDX53	76.8433	-12.074	2.28771	1.31e-07	1.68e-06	down
VAMP1	1077.61	-0.493809	0.093567	1.31e-07	1.68e-06	down
AK1	2304.15	-0.722337	0.136906	1.32e-07	1.69e-06	down
RBMS1	1413.62	0.458393	0.0869037	1.33e-07	1.7e-06	up
LOXL2	2128.48	-1.00133	0.189848	1.33e-07	1.7e-06	down
SRP14-AS1	152.974	0.966737	0.183325	1.34e-07	1.71e-06	up
SNRPB	12118.9	-0.701597	0.133058	1.34e-07	1.72e-06	down
TCF12	4751.53	0.579493	0.109904	1.34e-07	1.72e-06	up
P4HB	24129.3	-0.441759	0.0837886	1.35e-07	1.72e-06	down
UNKL	1025.49	-1.05498	0.200109	1.35e-07	1.72e-06	down
SIRT6	505.739	-1.10383	0.209375	1.35e-07	1.72e-06	down
GRAMD3	82.2799	1.20037	0.22769	1.35e-07	1.72e-06	up
LOC284454	1031.74	-0.975353	0.185018	1.35e-07	1.72e-06	down
INMT	11.0691	3.74107	0.709936	1.37e-07	1.74e-06	up
RABGAP1L	679.96	0.535268	0.101631	1.39e-07	1.77e-06	up
PCK2	2140.59	1.44236	0.273931	1.4e-07	1.78e-06	up
AL389983	108.589	-1.02976	0.195625	1.41e-07	1.79e-06	down
PRRX2	26.2084	2.1756	0.413356	1.42e-07	1.8e-06	up
PDLIM5	1738.96	0.516881	0.0982148	1.42e-07	1.8e-06	up
BC009321	100.283	-0.864685	0.164331	1.43e-07	1.81e-06	down
RDH10	2508.99	0.85182	0.161899	1.43e-07	1.81e-06	up
BMP2	347.508	0.901205	0.171309	1.44e-07	1.82e-06	up
MEX3A	772.466	0.67083	0.127549	1.45e-07	1.83e-06	up
CLN3	1738.72	-0.581351	0.110536	1.45e-07	1.83e-06	down
MTBP	887.211	0.476785	0.0906559	1.45e-07	1.83e-06	up
FAM174A	183.664	-0.799372	0.152034	1.46e-07	1.84e-06	down
SNRPF	6211.94	-0.443204	0.0842955	1.46e-07	1.84e-06	down
SEC31A	6217.17	-0.459715	0.0874459	1.46e-07	1.85e-06	down
C3orf38	419.79	0.72841	0.138579	1.47e-07	1.85e-06	up
C6orf48	3333.47	-0.518828	0.0987328	1.48e-07	1.87e-06	down
PPIB	18811.1	-0.411976	0.0783991	1.48e-07	1.87e-06	down
HGSNAT	1558.03	-0.662428	0.126072	1.49e-07	1.87e-06	down
OPHN1	445.373	0.706422	0.134461	1.49e-07	1.87e-06	up
SLC16A14	727.295	1.33782	0.254777	1.51e-07	1.9e-06	up
CHCHD1	2136.12	-0.458534	0.0873248	1.51e-07	1.9e-06	down
TSC22D1	5341.65	0.726133	0.138292	1.52e-07	1.9e-06	up
SATB1	15.7764	-5.99457	1.1421	1.53e-07	1.92e-06	down
RPS26	16744	-0.566867	0.108028	1.54e-07	1.93e-06	down
JOSD1	3582.41	0.523929	0.099873	1.55e-07	1.95e-06	up
ADPRHL1	303.819	0.6896	0.131472	1.56e-07	1.95e-06	up
ZFAS1	4108.56	-0.508737	0.0969954	1.56e-07	1.96e-06	down
EGR3	19.8056	3.98544	0.760121	1.58e-07	1.97e-06	up
FLRT2	486.538	0.671862	0.128147	1.58e-07	1.98e-06	up
NR2C1	1309.47	0.402659	0.076845	1.61e-07	2.01e-06	up
ZNF609	2849.88	0.406756	0.0776636	1.63e-07	2.03e-06	up
ZEB1	918.544	0.558189	0.106582	1.63e-07	2.03e-06	up
PSMA3	7687.93	-0.459428	0.0877323	1.63e-07	2.04e-06	down
APOBEC3F	74.866	1.98778	0.379603	1.64e-07	2.04e-06	up
CRISPLD1	54.1552	1.26849	0.242245	1.64e-07	2.04e-06	up
ATAT1	1063.47	-0.492287	0.0940175	1.64e-07	2.04e-06	down
SLC35A3	1264.53	0.635865	0.121444	1.64e-07	2.04e-06	up
ADAM12	833.737	-1.69706	0.324133	1.64e-07	2.04e-06	down
LTBR	5010.82	-0.634503	0.121279	1.68e-07	2.09e-06	down
LACC1	123.517	1.18303	0.226345	1.73e-07	2.14e-06	up
CSF1	366.645	-0.831069	0.159031	1.73e-07	2.15e-06	down
TMEM170B	266.665	0.807318	0.154498	1.74e-07	2.15e-06	up
NDUFAF5	706.827	-0.480757	0.0920185	1.75e-07	2.16e-06	down
TTBK2	368.818	1.06796	0.2045	1.77e-07	2.19e-06	up
BAX	3363.15	-0.571508	0.10949	1.79e-07	2.22e-06	down
COX7C	11385.7	-0.687682	0.131804	1.81e-07	2.24e-06	down
FSTL1	1933.89	-0.772048	0.14798	1.82e-07	2.25e-06	down
METTL12	89.7286	-1.06937	0.205176	1.87e-07	2.31e-06	down
CHAF1B	1467.09	-0.370341	0.0710599	1.87e-07	2.31e-06	down
ATP2A1	138.875	1.04636	0.200829	1.89e-07	2.33e-06	up
SBF2	2654.9	0.567401	0.108917	1.89e-07	2.34e-06	up
SLC12A3	63.5996	2.68343	0.515114	1.89e-07	2.34e-06	up
HM13	7166.3	-0.607195	0.116591	1.91e-07	2.35e-06	down
PRKAB2	1849.42	0.566132	0.108712	1.91e-07	2.36e-06	up
TALDO1	5680.29	-0.661839	0.127095	1.91e-07	2.36e-06	down
IKZF4	310.77	0.596009	0.114511	1.94e-07	2.39e-06	up
ALG14	392.676	-0.727271	0.139742	1.95e-07	2.39e-06	down
BC041347	32.3999	1.72334	0.3312	1.96e-07	2.4e-06	up
MRPL22	2809.33	-0.557254	0.107113	1.97e-07	2.41e-06	down
APRT	7407.3	-0.822719	0.158171	1.98e-07	2.43e-06	down
ZMIZ1-AS1	144.272	-1.28694	0.247468	1.99e-07	2.44e-06	down
PDP2	2103.16	0.509828	0.0980466	1.99e-07	2.44e-06	up
MEA1	2928.81	-0.548255	0.105458	2.01e-07	2.46e-06	down
CSNK2B	3583.28	-0.498062	0.0958066	2.01e-07	2.46e-06	down
PADI4	10.7411	3.48439	0.670279	2.01e-07	2.46e-06	up
AOX1	65.0203	-5.22396	1.00536	2.04e-07	2.49e-06	down
DNAJC25	487.447	-0.723409	0.139262	2.05e-07	2.51e-06	down
SFXN5	1116.42	-0.741836	0.142831	2.06e-07	2.52e-06	down
SFXN1	7311.38	-0.427947	0.082459	2.1e-07	2.57e-06	down
SLC17A7	89.5675	1.9758	0.380713	2.11e-07	2.57e-06	up
BCAP31	8800.59	-0.487152	0.0938724	2.11e-07	2.57e-06	down
FAM71F2	15.128	-2.79266	0.538199	2.12e-07	2.58e-06	down
ATP5B	71225.1	-0.382663	0.0737477	2.12e-07	2.58e-06	down
ARFIP2	4892.06	-0.46376	0.089382	2.12e-07	2.58e-06	down
MEF2A	1104.16	0.509041	0.0981637	2.15e-07	2.62e-06	up
AHCY	23886.8	-0.431762	0.0832775	2.16e-07	2.63e-06	down
HMGXB4	2133.91	0.446367	0.0860967	2.17e-07	2.63e-06	up
CYB561D1	981.637	0.404075	0.0779407	2.17e-07	2.63e-06	up
WDR77	9179.39	-0.750323	0.144765	2.18e-07	2.65e-06	down
AK126318	174.004	-0.933849	0.180203	2.19e-07	2.66e-06	down
PIR	943.059	-0.84474	0.163069	2.22e-07	2.68e-06	down
SLC12A5	111.148	1.10097	0.212618	2.24e-07	2.71e-06	up
CFL1	53030.5	-0.49852	0.0962758	2.24e-07	2.71e-06	down
AK123263	51.256	-1.50055	0.289796	2.24e-07	2.71e-06	down
COL19A1	11.8723	3.46491	0.669244	2.25e-07	2.72e-06	up
PCDHB12	28.4609	-2.03002	0.392114	2.25e-07	2.72e-06	down
NUDT4	1933.31	0.633618	0.12248	2.3e-07	2.78e-06	up
THBS1	786.943	1.25559	0.242738	2.31e-07	2.79e-06	up
PSD3	1653.51	0.800548	0.154812	2.33e-07	2.81e-06	up
PET100	1015.94	-0.911992	0.176519	2.38e-07	2.87e-06	down
BX538254	174.068	0.743347	0.143925	2.41e-07	2.9e-06	up
CLN6	3837.52	-1.02006	0.197514	2.41e-07	2.9e-06	down
SERINC5	319.739	-0.678813	0.131485	2.43e-07	2.93e-06	down
MPV17L2	1638.88	-0.658542	0.127573	2.44e-07	2.94e-06	down
RFC2	5458.22	-0.339765	0.0658398	2.46e-07	2.96e-06	down
LAS1L	6671.18	-0.44813	0.0868725	2.49e-07	2.99e-06	down
TMEM14A	946.533	-0.578761	0.112209	2.5e-07	3e-06	down
SERTAD1	262.718	-0.925929	0.179551	2.51e-07	3.01e-06	down
CCNYL1	1743.38	0.520193	0.100896	2.53e-07	3.03e-06	up
C11orf24	2746.76	-0.716205	0.13903	2.58e-07	3.1e-06	down
IFRD1	4303.71	0.495823	0.0962509	2.59e-07	3.1e-06	up
C2orf15	39.7333	1.43977	0.27956	2.6e-07	3.12e-06	up
PRR5	322.753	-1.12019	0.217678	2.66e-07	3.18e-06	down
RCN3	805.857	-1.13802	0.221305	2.71e-07	3.24e-06	down
QPRT	1246.21	1.55997	0.303458	2.74e-07	3.27e-06	up
PLEKHA8	1303.38	0.605902	0.117875	2.74e-07	3.28e-06	up
INSRR	16.0109	2.94	0.572001	2.75e-07	3.28e-06	up
BC160930	308.583	-0.910129	0.177086	2.76e-07	3.29e-06	down
CHRM3	10.6975	-4.40051	0.856469	2.78e-07	3.31e-06	down
LINC00662	214.787	0.80607	0.156886	2.78e-07	3.31e-06	up
FAR2	562.117	0.617896	0.120298	2.8e-07	3.33e-06	up
COL9A3	1322.68	1.16258	0.226419	2.83e-07	3.36e-06	up
FIGN	229.297	0.904736	0.176231	2.84e-07	3.38e-06	up
GID8	4141.86	0.387312	0.0754714	2.87e-07	3.41e-06	up
CACUL1	3396.22	0.490913	0.0956959	2.9e-07	3.44e-06	up
ZDHHC9	2345.59	-0.372755	0.0726725	2.91e-07	3.45e-06	down
UBE2D2	4723.32	-0.369431	0.0720295	2.91e-07	3.46e-06	down
ENGASE	1427.13	-0.834474	0.162704	2.92e-07	3.46e-06	down
KIAA1731	3124.46	0.439597	0.08572	2.92e-07	3.47e-06	up
LINC00847	102.791	-1.24215	0.242372	2.98e-07	3.52e-06	down
TMEM56	463.615	0.849389	0.165748	2.98e-07	3.53e-06	up
GPI	36811	-0.563185	0.109961	3.03e-07	3.58e-06	down
C11orf91	18.3852	-2.75246	0.537484	3.04e-07	3.59e-06	down
NEK11	25.1635	-1.66185	0.324527	3.04e-07	3.6e-06	down
TMX2	7626.06	-0.609625	0.119112	3.09e-07	3.65e-06	down
TWIST1	300.318	1.02394	0.200123	3.11e-07	3.67e-06	up
BEND6	205.373	-0.972053	0.190008	3.12e-07	3.68e-06	down
COL26A1	14.934	3.01403	0.589157	3.12e-07	3.68e-06	up
CXXC4	225.321	0.796958	0.155785	3.12e-07	3.68e-06	up
FZD5	773.771	0.484039	0.0946319	3.14e-07	3.7e-06	up
WDR67	1975.21	0.655419	0.128148	3.14e-07	3.7e-06	up
CSAG1	1266.91	-0.545757	0.106748	3.18e-07	3.74e-06	down
LOC440894	455.523	0.599652	0.117335	3.21e-07	3.78e-06	up
CR749689	98.8622	-1.10798	0.216892	3.25e-07	3.82e-06	down
SEC61B	3241.29	-0.383844	0.0751524	3.26e-07	3.83e-06	down
MPP3	635.159	-0.628963	0.123156	3.27e-07	3.84e-06	down
CINP	2776.94	-0.428947	0.0840194	3.3e-07	3.87e-06	down
ANKRD29	1096.55	0.758486	0.148582	3.31e-07	3.88e-06	up
SIX1	529.605	0.568819	0.111455	3.33e-07	3.91e-06	up
SYT7	396.117	0.729761	0.14301	3.35e-07	3.92e-06	up
OBSL1	1707.83	0.941421	0.184523	3.36e-07	3.94e-06	up
ABI2	5084.15	0.594585	0.116715	3.5e-07	4.09e-06	up
DOCK2	87.3225	-2.12483	0.417243	3.53e-07	4.13e-06	down
BTF3	27001.5	-0.405889	0.0797145	3.55e-07	4.14e-06	down
LINC00908	10.4306	4.28044	0.841053	3.59e-07	4.2e-06	up
SNORD52	128.152	-0.807114	0.158636	3.62e-07	4.23e-06	down
HHIPL2	58.9532	1.25119	0.24594	3.63e-07	4.24e-06	up
PINX1	823.16	-0.424664	0.0834942	3.65e-07	4.26e-06	down
BCAP29	1530.61	-0.587184	0.115474	3.68e-07	4.28e-06	down
SUSD2	49.3104	1.84189	0.362275	3.69e-07	4.3e-06	up
NT5DC1	3906.65	-0.536869	0.105611	3.71e-07	4.31e-06	down
SOBP	821.922	0.685966	0.134982	3.74e-07	4.34e-06	up
NFIC	4014.09	-0.729325	0.143514	3.74e-07	4.34e-06	down
GGCT	4554.18	-0.421348	0.0829459	3.78e-07	4.39e-06	down
EPB41L2	10039.8	0.566144	0.111527	3.85e-07	4.47e-06	up
ZNF281	2252.79	0.785829	0.154815	3.86e-07	4.48e-06	up
POP4	1723.87	-0.456073	0.0898768	3.89e-07	4.51e-06	down
TRAM2-AS1	92.4552	0.908908	0.179186	3.93e-07	4.55e-06	up
DPP3	2988.52	-0.729289	0.143776	3.93e-07	4.55e-06	down
HIST1H2AC	363.271	0.845252	0.16665	3.94e-07	4.56e-06	up
BC073817	30.4594	-1.58625	0.312795	3.95e-07	4.58e-06	down
PRR16	44.8929	-1.47649	0.291185	3.97e-07	4.59e-06	down
KIAA0040	1012.58	0.817995	0.161331	3.97e-07	4.59e-06	up
MTHFSD	744.974	0.421063	0.0830577	3.99e-07	4.61e-06	up
RGPD8	85.8467	0.906903	0.178912	4e-07	4.62e-06	up
KLHL15	1137.92	0.857851	0.169263	4.02e-07	4.64e-06	up
LGALS9	112.609	-1.17663	0.232609	4.23e-07	4.88e-06	down
IFT81	767.172	0.676438	0.133739	4.24e-07	4.89e-06	up
JX003871	525.153	0.562299	0.111176	4.24e-07	4.89e-06	up
ZBTB46	292.613	1.3069	0.258403	4.25e-07	4.89e-06	up
UBE2D4	817.98	-0.538251	0.106438	4.26e-07	4.9e-06	down
SSUH2	79.8242	-1.00892	0.199522	4.27e-07	4.91e-06	down
MEX3C	1311.08	0.536053	0.106014	4.27e-07	4.91e-06	up
TNFRSF19	808.998	0.722387	0.142871	4.28e-07	4.91e-06	up
SLC35E2B	1893.39	0.461088	0.0911949	4.28e-07	4.91e-06	up
SLC38A2	18649.3	0.693617	0.137206	4.3e-07	4.93e-06	up
FAM198B	10.6966	3.66774	0.725713	4.33e-07	4.96e-06	up
NME8	22.4578	7.46264	1.47736	4.39e-07	5.03e-06	up
IFT80	1338.22	0.536795	0.106286	4.41e-07	5.05e-06	up
ZNF558	418.952	0.743254	0.147166	4.41e-07	5.05e-06	up
RPS28	8259.87	-1.21686	0.240951	4.41e-07	5.05e-06	down
ZNF620	392.375	0.594317	0.117691	4.42e-07	5.06e-06	up
ECM1	128.652	-0.98176	0.194449	4.44e-07	5.08e-06	down
CDK6	2852.81	-0.875317	0.173383	4.45e-07	5.09e-06	down
COL6A4P1	45.0017	1.62656	0.322264	4.48e-07	5.12e-06	up
FBXO4	759.574	-0.516431	0.102333	4.5e-07	5.13e-06	down
LOC648987	729.99	-0.493864	0.0978984	4.54e-07	5.18e-06	down
CDH1	12.4245	4.97715	0.987409	4.64e-07	5.29e-06	up
TMC6	652.809	1.34279	0.266405	4.65e-07	5.29e-06	up
FAF2	5196.07	-0.442006	0.0877138	4.68e-07	5.32e-06	down
GNL2	5792.34	-0.501177	0.0994655	4.69e-07	5.33e-06	down
FMNL3	611.446	0.559607	0.111065	4.69e-07	5.34e-06	up
LPGAT1	3359.82	0.617236	0.12252	4.71e-07	5.35e-06	up
EMC6	1165.53	-0.442361	0.0878219	4.73e-07	5.37e-06	down
ARMCX4	53.3247	-11.5517	2.2935	4.74e-07	5.38e-06	down
EIF3D	15886.4	-0.376123	0.0747408	4.84e-07	5.5e-06	down
KAT2B	437.301	0.600204	0.119281	4.86e-07	5.51e-06	up
PEAK1	1160.53	0.574478	0.114208	4.9e-07	5.56e-06	up
HTATIP2	4553.89	-0.461083	0.0916692	4.91e-07	5.56e-06	down
TM7SF2	100.817	-0.883441	0.175665	4.93e-07	5.58e-06	down
OSBPL3	2048.15	0.588412	0.117005	4.93e-07	5.58e-06	up
FBXO38	2032.52	-0.456139	0.0907719	5.03e-07	5.69e-06	down
LIPG	183.832	-0.843117	0.167789	5.04e-07	5.7e-06	down
PAX6	735.967	0.969463	0.193012	5.09e-07	5.75e-06	up
PAK1IP1	3171.99	-0.598507	0.119188	5.13e-07	5.79e-06	down
FCGR2A	44.0347	-1.62386	0.323493	5.17e-07	5.84e-06	down
RPS6KA4	2182.21	-0.955155	0.190284	5.18e-07	5.84e-06	down
TEX22	78.9383	-1.2627	0.251577	5.19e-07	5.85e-06	down
TMEM158	437.723	-0.672866	0.134092	5.22e-07	5.89e-06	down
PSMB7	12003.3	-0.456466	0.0910112	5.29e-07	5.96e-06	down
CBX5	19187	0.547828	0.109243	5.31e-07	5.98e-06	up
RBPJ	1751.63	0.608217	0.121297	5.32e-07	5.99e-06	up
SIDT2	1024	0.801574	0.159909	5.37e-07	6.04e-06	up
NRXN3	9.7517	-4.25957	0.850389	5.47e-07	6.15e-06	down
RPLP0	93048.8	-0.414116	0.0827143	5.54e-07	6.22e-06	down
ZHX1	2737.33	0.692378	0.138325	5.57e-07	6.26e-06	up
WNT10B	2095.13	-0.470993	0.0941556	5.67e-07	6.36e-06	down
GALNT3	91.063	1.50848	0.301578	5.68e-07	6.36e-06	up
RHOBTB1	2057.49	0.804892	0.160992	5.75e-07	6.44e-06	up
USP6NL	594.939	0.617407	0.123521	5.78e-07	6.48e-06	up
SLC22A31	12.7557	2.63038	0.526301	5.8e-07	6.49e-06	up
FNDC3B	1555.22	0.735677	0.147201	5.8e-07	6.49e-06	up
CERS2	13222.8	-0.400991	0.0802409	5.81e-07	6.5e-06	down
ANKRD18B	594.151	0.678379	0.135783	5.85e-07	6.54e-06	up
NME4	1698.32	-0.676427	0.13543	5.89e-07	6.58e-06	down
MRPS23	3822.74	-0.364555	0.0729925	5.9e-07	6.59e-06	down
MSTO1	1848.94	-0.531821	0.106494	5.92e-07	6.6e-06	down
STT3A	6167.6	-0.580386	0.116343	6.08e-07	6.78e-06	down
LOC100132111	35.9823	1.55957	0.31284	6.19e-07	6.9e-06	up
ZDHHC21	346.974	-0.725576	0.145575	6.22e-07	6.93e-06	down
GFI1B	17.2971	2.16575	0.434552	6.23e-07	6.94e-06	up
LRRC16B	100.745	1.57092	0.315238	6.25e-07	6.96e-06	up
PRR7-AS1	118.276	-1.57279	0.315647	6.27e-07	6.97e-06	down
STC1	269.262	0.991869	0.199074	6.28e-07	6.98e-06	up
RPS13	29729.7	-0.436868	0.0876965	6.31e-07	7.01e-06	down
PIK3R3	2570.26	0.561664	0.112783	6.36e-07	7.06e-06	up
SRM	7198.51	-0.965712	0.194049	6.47e-07	7.18e-06	down
CYP27B1	553.864	0.851965	0.171195	6.47e-07	7.18e-06	up
JDP2	588.78	1.37612	0.276581	6.51e-07	7.22e-06	up
VIMP	1541.84	-0.475948	0.0956885	6.56e-07	7.27e-06	down
PSMG3	2923.87	-0.418528	0.0841693	6.61e-07	7.32e-06	down
MED11	895.337	-0.517317	0.104037	6.61e-07	7.32e-06	down
MFAP4	132.171	2.1528	0.433174	6.7e-07	7.41e-06	up
WDR72	60.3429	1.30082	0.261885	6.79e-07	7.51e-06	up
SLC39A7	10485.9	-0.48805	0.0982841	6.85e-07	7.57e-06	down
LIMD1-AS1	22.1914	1.97165	0.397085	6.86e-07	7.57e-06	up
TMEM223	1078.51	-0.457401	0.0921197	6.86e-07	7.57e-06	down
GYPC	9.90959	-4.70598	0.948114	6.92e-07	7.64e-06	down
LINC00857	165.167	-0.919951	0.18537	6.95e-07	7.66e-06	down
LCA5	145.029	1.33898	0.269855	6.98e-07	7.7e-06	up
NMNAT1	278.029	0.754904	0.152167	7.01e-07	7.72e-06	up
ATP6V1F	3341.71	-0.581009	0.117118	7.02e-07	7.73e-06	down
AK094156	22.7522	1.75312	0.353498	7.07e-07	7.78e-06	up
CCDC171	119.703	0.771907	0.155716	7.15e-07	7.87e-06	up
LSM10	1769.02	-0.649492	0.131024	7.16e-07	7.87e-06	down
SAMD8	1143.94	0.708959	0.143032	7.17e-07	7.88e-06	up
CACNG8	183.05	0.803934	0.162286	7.28e-07	7.99e-06	up
CYB561	2822.24	-0.550308	0.111094	7.29e-07	8e-06	down
FBL	17256.9	-0.42196	0.0851933	7.31e-07	8.02e-06	down
C6orf147	422.207	-0.647814	0.130818	7.34e-07	8.05e-06	down
GLCCI1	616.655	0.566738	0.114486	7.41e-07	8.12e-06	up
ABCC2	86.6371	-2.11272	0.426912	7.47e-07	8.18e-06	down
CTDNEP1	6554.84	-0.421802	0.0852337	7.47e-07	8.18e-06	down
ADAMTSL5	231.465	-0.890792	0.180032	7.5e-07	8.21e-06	down
DHCR7	5523.1	-0.552826	0.111744	7.53e-07	8.23e-06	down
MMP9	27.8837	1.62681	0.32889	7.56e-07	8.26e-06	up
FAM171B	246.773	0.946805	0.191423	7.57e-07	8.27e-06	up
GGT5	12.9382	3.03652	0.613977	7.59e-07	8.28e-06	up
POLR2E	5995.84	-1.00225	0.202655	7.59e-07	8.28e-06	down
SCN4A	146.62	1.3674	0.276579	7.65e-07	8.35e-06	up
AQP3	6683.66	1.11422	0.2254	7.68e-07	8.37e-06	up
KLLN	54.5769	1.22955	0.24876	7.7e-07	8.39e-06	up
RPS6KA2	177.145	0.748551	0.151458	7.72e-07	8.41e-06	up
NOL3	1087.57	-0.612367	0.123911	7.73e-07	8.42e-06	down
AUP1	10431.5	-0.498185	0.100839	7.8e-07	8.48e-06	down
SETBP1	412.763	0.748503	0.151532	7.83e-07	8.51e-06	up
AX747577	132.856	-1.10924	0.224587	7.85e-07	8.53e-06	down
PCDHGA12	26.6919	1.7054	0.345331	7.87e-07	8.55e-06	up
KIAA0319L	2536.1	0.413784	0.0838008	7.9e-07	8.58e-06	up
LOC100506599	187.505	-0.809348	0.163925	7.92e-07	8.59e-06	down
ZGLP1	50.4844	-1.23175	0.249488	7.93e-07	8.6e-06	down
PPP1R11	2938.47	-0.459391	0.0930655	7.97e-07	8.63e-06	down
PXK	370.292	0.650111	0.131705	7.97e-07	8.63e-06	up
BACH2	19.1876	1.92365	0.389793	8.01e-07	8.67e-06	up
DPP9	4229.96	-0.72541	0.14702	8.05e-07	8.71e-06	down
CDA	1141.34	-0.557198	0.112946	8.09e-07	8.74e-06	down
PPM1H	1173.77	0.510752	0.103541	8.1e-07	8.76e-06	up
YIPF1	629.856	-0.534515	0.10838	8.14e-07	8.8e-06	down
THOC7	2578.63	-0.379123	0.0768782	8.16e-07	8.81e-06	down
NCOA3	2863.65	0.440785	0.0894093	8.22e-07	8.88e-06	up
TCAM1P	9.62985	4.61222	0.935683	8.25e-07	8.9e-06	up
PDCD5	5939.58	-0.483349	0.0981337	8.42e-07	9.08e-06	down
CALR	43020.4	-0.436259	0.0885786	8.43e-07	9.09e-06	down
RAPGEF3	76.0739	1.16137	0.23586	8.48e-07	9.13e-06	up
PSMG4	459.639	-0.735106	0.149312	8.51e-07	9.16e-06	down
C4B_2	28.3811	-2.51962	0.511779	8.51e-07	9.16e-06	down
CISD1	2671.92	-0.407625	0.082799	8.52e-07	9.16e-06	down
DYNC1LI2	9362.18	0.465483	0.0945814	8.59e-07	9.23e-06	up
CAPN5	158.625	0.880179	0.178892	8.65e-07	9.29e-06	up
RPL35	33198.9	-0.53003	0.107754	8.7e-07	9.34e-06	down
ACVRL1	15.964	2.5291	0.514192	8.72e-07	9.35e-06	up
KIAA1191	4299.1	-0.325235	0.0661404	8.77e-07	9.4e-06	down
SORD	5616.41	-0.479102	0.0974311	8.77e-07	9.4e-06	down
DTX4	864.155	1.23422	0.251035	8.81e-07	9.44e-06	up
TC2N	1022.24	1.1225	0.22833	8.83e-07	9.45e-06	up
ZNF77	240.171	-0.711388	0.144718	8.85e-07	9.47e-06	down
PSMA1	9608.08	-0.509373	0.103643	8.89e-07	9.51e-06	down
ATP1B2	36.1093	-1.50467	0.306176	8.91e-07	9.52e-06	down
WDR4	1655.93	-0.638186	0.129868	8.92e-07	9.53e-06	down
C12orf10	4128.97	-0.63987	0.130212	8.92e-07	9.53e-06	down
KIAA1958	259.541	0.784754	0.159716	8.95e-07	9.55e-06	up
DISP1	799.105	0.47407	0.0965066	9e-07	9.6e-06	up
AX747819	88.2686	-1.23781	0.251992	9.01e-07	9.61e-06	down
PSMD14	4502.9	-0.434691	0.088507	9.04e-07	9.64e-06	down
UNC5A	64.3792	1.79193	0.364939	9.1e-07	9.69e-06	up
OGFRL1	628.941	0.673974	0.137308	9.18e-07	9.77e-06	up
TMEM120A	1301.78	-0.662762	0.135049	9.22e-07	9.81e-06	down
NIPAL3	404.268	-0.648986	0.132302	9.33e-07	9.92e-06	down
RORB	22.6262	2.61127	0.532348	9.33e-07	9.92e-06	up
CAMK2N1	415.565	1.36452	0.278207	9.36e-07	9.94e-06	up
KIAA0907	6252.23	-0.313491	0.063926	9.39e-07	9.97e-06	down
PTPN6	171.959	-0.958491	0.195455	9.39e-07	9.97e-06	down
SLC16A3	6906.6	-0.917542	0.187119	9.41e-07	9.98e-06	down
LOC389641	310.259	0.559387	0.11408	9.42e-07	9.98e-06	up
LRRN4	22.9544	2.93026	0.597696	9.46e-07	1e-05	up
DUS1L	5054.36	-0.831769	0.169686	9.5e-07	1.01e-05	down
PRDM6	50.6454	1.56599	0.319489	9.51e-07	1.01e-05	up
GPR1	151.74	1.29845	0.264994	9.59e-07	1.01e-05	up
C10orf90	11.1501	-4.91743	1.00365	9.6e-07	1.02e-05	down
FKBP4	17484.6	-0.36756	0.0750229	9.62e-07	1.02e-05	down
CCDC174	991.332	0.42432	0.0866107	9.62e-07	1.02e-05	up
RRP9	2844.33	-1.09542	0.223603	9.64e-07	1.02e-05	down
TNS4	453.936	0.937571	0.191441	9.71e-07	1.02e-05	up
EMB	294.359	-0.790471	0.16145	9.78e-07	1.03e-05	down
PCDHGA1	21.9044	1.77726	0.363002	9.78e-07	1.03e-05	up
ZNF792	111.111	0.888157	0.181581	1e-06	1.06e-05	up
NXPH3	27.9604	1.66184	0.339769	1e-06	1.06e-05	up
VILL	14.2141	2.30538	0.471373	1e-06	1.06e-05	up
ARMC7	412.705	-0.750235	0.153398	1e-06	1.06e-05	down
ZNF778	362.373	0.555647	0.113653	1.01e-06	1.07e-05	up
LOXL1-AS1	409.216	0.888404	0.181746	1.02e-06	1.07e-05	up
SFXN2	695.533	-0.643732	0.131748	1.03e-06	1.08e-05	down
EAF1	2067.97	0.496674	0.101688	1.04e-06	1.09e-05	up
ZNF774	103.634	1.02262	0.209432	1.05e-06	1.1e-05	up
CDON	528.117	0.938466	0.19225	1.05e-06	1.1e-05	up
SLCO1C1	20.0289	-2.0846	0.427071	1.05e-06	1.11e-05	down
ESD	4535.88	-0.427408	0.0875651	1.06e-06	1.11e-05	down
BMP5	3235.2	-0.814777	0.166966	1.06e-06	1.11e-05	down
PREB	2313.07	-0.499074	0.102283	1.06e-06	1.11e-05	down
NDUFA7	1874.61	-0.826559	0.169409	1.07e-06	1.12e-05	down
PIK3CB	2114.37	0.541018	0.110916	1.07e-06	1.12e-05	up
HERPUD2	652.683	0.530062	0.108701	1.08e-06	1.13e-05	up
ANKRD32	3834.72	0.584952	0.12001	1.09e-06	1.14e-05	up
CRKL	2338.27	0.681295	0.139805	1.1e-06	1.15e-05	up
BEST3	28.029	-2.30676	0.473563	1.11e-06	1.16e-05	down
EFHD1	770.232	1.20844	0.248278	1.13e-06	1.18e-05	up
PCDH15	22.77	2.44351	0.50222	1.14e-06	1.19e-05	up
PNRC1	1687.95	0.466369	0.0958567	1.14e-06	1.19e-05	up
SMARCA1	6256.5	0.901619	0.185319	1.14e-06	1.19e-05	up
NDUFAF4	1822.74	-0.574979	0.118305	1.17e-06	1.22e-05	down
FEM1A	1761.06	-0.67548	0.138998	1.18e-06	1.22e-05	down
GBP3	100.815	-0.980433	0.20178	1.18e-06	1.23e-05	down
NOL7	4152.19	-0.50177	0.103296	1.19e-06	1.24e-05	down
HLA-B	5526.24	-0.737937	0.151937	1.19e-06	1.24e-05	down
GFI1	107.591	1.38502	0.285211	1.2e-06	1.24e-05	up
DBNDD1	1120.89	1.06176	0.21869	1.2e-06	1.25e-05	up
GRHPR	4129.72	-0.490806	0.101115	1.21e-06	1.26e-05	down
GNAZ	349.618	1.00355	0.206785	1.22e-06	1.26e-05	up
EIF2B4	1897.57	-0.465012	0.095823	1.22e-06	1.26e-05	down
AK094859	13.3971	-3.30508	0.6814	1.23e-06	1.28e-05	down
FAM132B	348.915	1.08627	0.223978	1.24e-06	1.28e-05	up
ADAMTS6	355.238	1.12413	0.231855	1.24e-06	1.29e-05	up
KLHL29	637.971	0.829364	0.171117	1.25e-06	1.3e-05	up
DAGLB	1312.58	-0.401959	0.0829451	1.26e-06	1.3e-05	down
CYB5D1	841.586	-0.546994	0.112895	1.27e-06	1.31e-05	down
RBM43	143.212	0.897845	0.18532	1.27e-06	1.31e-05	up
SUV420H1	1971.06	0.470784	0.0971957	1.27e-06	1.32e-05	up
[truncated: 18,636 more rows]

## Sheet: t487i_vs_Hela
Gene	baseMean	log2FoldChange	lfcSE	pvalue	q-value	regulation
C14orf159	658.193	-3.45144	0.126917	7.57e-163	1.54e-158	down
SLC2A13	1783.05	3.12529	0.141044	8.69e-109	8.87e-105	up
AKT3	2697.5	1.69024	0.0783468	3.16e-103	2.15e-99	up
CGA	1141.74	2.86723	0.13315	7.5e-103	3.83e-99	up
COL3A1	1810.62	-2.7875	0.130662	5.53e-101	2.26e-97	down
CFTR	626.903	3.96166	0.193468	3.45e-93	1.17e-89	up
SRRT	7806.07	-1.33306	0.0740109	1.58e-72	4.61e-69	down
GREM2	208.09	4.08656	0.231728	1.32e-69	3.38e-66	up
RALGPS2	1028.25	1.64529	0.0941087	1.93e-68	4.39e-65	up
WDR25	489.81	-1.8574	0.106995	1.67e-67	3.4e-64	down
GFPT1	6042.29	1.50985	0.0883161	1.59e-65	2.95e-62	up
NUDT14	596.271	-1.5274	0.0942749	4.92e-59	8.37e-56	down
POMT1	357.939	-2.26663	0.140649	1.99e-58	3.12e-55	down
SEMA3A	1835.9	1.25875	0.0783102	3.89e-58	5.67e-55	up
S100A2	10574.7	-2.07762	0.129645	8.48e-58	1.15e-54	down
MID2	386.124	1.94463	0.122804	1.78e-56	2.27e-53	up
KLF12	610.97	1.51046	0.0967271	5.69e-55	6.84e-52	up
SEC24D	2851.82	1.6474	0.106941	1.52e-53	1.72e-50	up
GBP2	685.67	1.87674	0.121984	2.06e-53	2.21e-50	up
CLIC4	2572.92	1.56496	0.101985	3.83e-53	3.91e-50	up
SEMA6D	1384.29	2.76174	0.180756	1.06e-52	1.03e-49	up
EMC9	573.69	-1.52683	0.100186	1.92e-52	1.78e-49	down
C14orf169	719.667	-1.71635	0.112687	2.2e-52	1.95e-49	down
COG6	1286.4	1.29794	0.0854759	4.45e-52	3.79e-49	up
DDR2	677.044	1.74201	0.115511	2.16e-51	1.77e-48	up
ERBB2IP	3438.78	0.977466	0.0648347	2.32e-51	1.82e-48	up
SDR39U1	1168.38	-1.13645	0.0755688	4.1e-51	3.1e-48	down
NCAM2	343.327	2.26734	0.150889	4.92e-51	3.59e-48	up
JMY	1112.4	1.5517	0.10366	1.17e-50	8.23e-48	up
GLCCI1	836.581	1.34017	0.0900716	4.52e-50	2.99e-47	up
CDYL2	1006.38	1.39013	0.0934314	4.54e-50	2.99e-47	up
STUB1	3511.07	-1.29228	0.0871243	9.02e-50	5.76e-47	down
TRIM2	549.725	1.33046	0.08988	1.41e-49	8.71e-47	up
C12orf23	2683.94	1.27077	0.087154	3.72e-48	2.24e-45	up
RNF169	2804.87	1.10732	0.0761166	6.04e-48	3.52e-45	up
FDX1L	755.059	-1.42695	0.0981332	6.67e-48	3.78e-45	down
CREB5	151.819	4.38183	0.303553	3.11e-47	1.72e-44	up
LIFR	4314.67	1.15735	0.0805076	7.35e-47	3.95e-44	up
IBTK	3950.78	1.00406	0.06993	9.49e-47	4.97e-44	up
PQBP1	3279.96	-1.5515	0.108775	3.7e-46	1.89e-43	down
SOAT1	8424.08	0.961087	0.0674321	4.32e-46	2.15e-43	up
RAPH1	5137.4	1.74958	0.122938	5.85e-46	2.85e-43	up
CEP44	1464.24	0.984307	0.0694094	1.2e-45	5.69e-43	up
TMEM47	1197.12	1.48538	0.104888	1.58e-45	7.35e-43	up
DDHD2	2489.74	1.14339	0.0808057	1.87e-45	8.5e-43	up
KRT10	4056.57	-1.453	0.102842	2.54e-45	1.13e-42	down
GULP1	1146.51	1.17718	0.0834741	3.68e-45	1.6e-42	up
ERLEC1	3643.8	0.98963	0.0703701	6.39e-45	2.72e-42	up
PTP4A1	22066.3	1.32442	0.0942973	8.25e-45	3.44e-42	up
RHOQ	3110.37	1.19202	0.0850392	1.22e-44	4.99e-42	up
ZMAT3	1109.51	1.54104	0.110173	1.86e-44	7.44e-42	up
MRPL28	2048.79	-1.22584	0.0879432	3.67e-44	1.44e-41	down
S100A16	2976.87	-2.1296	0.152793	3.73e-44	1.44e-41	down
RNF31	1371.52	-1.1409	0.0820191	5.5e-44	2.08e-41	down
SEC22B	5256.25	0.846383	0.0609046	6.62e-44	2.46e-41	up
POC1B	856.956	1.07383	0.077726	2.05e-43	7.48e-41	up
GADD45GIP1	2474.47	-1.61977	0.117453	2.89e-43	1.04e-40	down
SAMD8	1723.42	1.66361	0.120933	4.66e-43	1.64e-40	up
RBL2	3224.55	1.14913	0.083754	7.67e-43	2.66e-40	up
EXOSC4	701.952	-1.95879	0.143173	1.31e-42	4.47e-40	down
AFF1	2820.43	1.19282	0.0872034	1.36e-42	4.56e-40	up
IFI44L	1373.41	1.63377	0.119727	2.14e-42	7.04e-40	up
MAL2	723.979	1.79663	0.131838	2.74e-42	8.89e-40	up
EIF2AK3	1075.75	1.12441	0.0825302	2.87e-42	9.17e-40	up
MRPL52	1375.02	-1.30714	0.0960414	3.48e-42	1.09e-39	down
ARMCX3	2152.19	0.847257	0.0624331	5.98e-42	1.85e-39	up
WHAMMP1	976.141	2.06576	0.152259	6.25e-42	1.9e-39	up
ZFAND1	2569.93	0.802725	0.0594263	1.4e-41	4.16e-39	up
TBC1D5	1659.98	1.13557	0.0840677	1.41e-41	4.16e-39	up
SORBS2	691.247	3.35465	0.249573	3.45e-41	1.01e-38	up
GBP1	368.698	1.61191	0.1206	9.59e-41	2.76e-38	up
ACBD3	3107.84	1.02335	0.0768728	1.97e-40	5.58e-38	up
WSCD1	266.128	-1.63374	0.122931	2.65e-40	7.41e-38	down
CEP120	1146.64	0.981714	0.0740499	4.08e-40	1.13e-37	up
BC067230	2680.38	1.70613	0.128736	4.34e-40	1.18e-37	up
FBXL6	1145.55	-1.3438	0.101799	8.71e-40	2.34e-37	down
FAM129A	1342.89	1.87301	0.142294	1.43e-39	3.8e-37	up
AK056105	128.121	-2.66753	0.202714	1.51e-39	3.95e-37	down
OSGEP	1562.62	-1.15253	0.0876618	1.76e-39	4.55e-37	down
RCN1	21322.5	1.17016	0.08927	2.96e-39	7.55e-37	up
AURKAIP1	2905.15	-1.44567	0.110943	8.18e-39	2.06e-36	down
LYPD1	525.463	-3.94966	0.303253	8.9e-39	2.22e-36	down
RRP7A	2970.98	-1.47366	0.113246	1.03e-38	2.54e-36	down
NOC4L	1073.57	-1.86772	0.143545	1.05e-38	2.56e-36	down
TRIQK	529.299	1.7488	0.134623	1.39e-38	3.33e-36	up
ARMCX2	712.638	1.3544	0.104294	1.46e-38	3.47e-36	up
UHRF1BP1	3154.39	0.830596	0.0639635	1.48e-38	3.47e-36	up
CCDC12	1012.98	-1.12201	0.0867776	3.06e-38	7.1e-36	down
MYO6	2734.06	1.26301	0.0981236	6.5e-38	1.49e-35	up
OCRL	5419.85	0.921364	0.0718375	1.18e-37	2.67e-35	up
PABPN1	1460.36	-1.02642	0.0801272	1.44e-37	3.24e-35	down
BCL7C	762.401	-1.41111	0.110303	1.79e-37	3.98e-35	down
MRM1	756.067	-1.32731	0.103923	2.35e-37	5.16e-35	down
PLEKHM3	631.572	1.116	0.0876141	3.65e-37	7.93e-35	up
PPP1R14B	6507.48	-1.3074	0.102755	4.38e-37	9.41e-35	down
KANSL1L	456.074	1.51504	0.119107	4.58e-37	9.74e-35	up
TRIM47	1384.49	-1.25739	0.0989356	5.26e-37	1.11e-34	down
FNDC3A	4959.01	1.47703	0.116452	7.29e-37	1.52e-34	up
C10orf118	894.687	1.63717	0.129415	1.11e-36	2.29e-34	up
DTX3	281.242	-1.79577	0.141977	1.14e-36	2.33e-34	down
MTHFD2	13511.2	0.930035	0.0737601	1.89e-36	3.81e-34	up
C1orf35	769.844	-1.11555	0.0885198	2.05e-36	4.1e-34	down
CRIP1	418.052	-1.72749	0.137098	2.1e-36	4.15e-34	down
TXNIP	6040.8	2.77193	0.219996	2.11e-36	4.15e-34	up
TPM2	9808.19	-1.03424	0.0821532	2.42e-36	4.71e-34	down
PDP2	2971.89	1.37366	0.109396	3.65e-36	7.03e-34	up
CEBPG	2573.32	1.11072	0.0884742	3.77e-36	7.2e-34	up
PPP1R12C	1514.63	-1.28637	0.102509	4.03e-36	7.62e-34	down
RBM42	2038.79	-1.5817	0.126168	4.72e-36	8.84e-34	down
NOP56	14256.7	-1.0588	0.0844814	4.93e-36	9.15e-34	down
COMMD4	2759.28	-1.08637	0.0867354	5.44e-36	1e-33	down
WRAP53	1242.22	-1.17858	0.0944114	9.2e-36	1.68e-33	down
FAS	409.481	1.39724	0.111981	9.91e-36	1.79e-33	up
PYCRL	852.412	-2.11083	0.169178	9.97e-36	1.79e-33	down
AF268386	828.785	2.09297	0.167982	1.24e-35	2.21e-33	up
DGCR6L	584.073	-1.89642	0.152336	1.42e-35	2.49e-33	down
RFXANK	1924.07	-1.19161	0.0957846	1.58e-35	2.75e-33	down
FAM107B	1509.06	1.44676	0.11639	1.79e-35	3.1e-33	up
GPRIN3	109.793	2.79488	0.225333	2.51e-35	4.27e-33	up
SLC16A14	1631.29	2.87778	0.232018	2.51e-35	4.27e-33	up
SART1	3704.6	-1.30718	0.105418	2.61e-35	4.41e-33	down
HRAS	690.51	-1.56363	0.126112	2.65e-35	4.44e-33	down
HLTF	5234.31	1.07854	0.0870164	2.79e-35	4.64e-33	up
APEX1	10162.9	-1.41744	0.114605	3.89e-35	6.41e-33	down
LCORL	402.135	1.53269	0.124001	4.29e-35	7.01e-33	up
UBA7	211.566	3.95967	0.32074	5.16e-35	8.36e-33	up
MOSPD2	1465.1	1.05248	0.0853234	5.86e-35	9.42e-33	up
ACTN1	6666.72	-1.17781	0.0955209	6.21e-35	9.91e-33	down
POLR2L	1879.89	-1.59904	0.129821	7.31e-35	1.16e-32	down
PELP1	5458.85	-1.01297	0.0824828	1.15e-34	1.8e-32	down
ARHGAP12	841.216	0.967968	0.0788637	1.25e-34	1.95e-32	up
MAP1B	1017.51	1.67895	0.136852	1.34e-34	2.07e-32	up
PACSIN3	2711.96	-1.15803	0.0945263	1.66e-34	2.55e-32	down
PGM3	4164.75	1.11104	0.0909867	2.71e-34	4.13e-32	up
KLHL24	743.71	2.59216	0.212524	3.22e-34	4.87e-32	up
C11orf30	2917.9	1.11595	0.0916378	4.08e-34	6.13e-32	up
G6PC3	3529.89	-0.774542	0.0636464	4.52e-34	6.69e-32	down
C9orf72	647.925	1.56939	0.128961	4.52e-34	6.69e-32	up
TTC3	7316.75	0.861559	0.0708198	4.75e-34	6.97e-32	up
COL25A1	1770.99	2.45964	0.202207	4.84e-34	7.05e-32	up
KLHL9	2033.03	0.983995	0.0809134	5.01e-34	7.25e-32	up
ACOT7	1428.36	-1.27079	0.104538	5.32e-34	7.65e-32	down
PSMB5	8954.2	-1.254	0.103207	5.71e-34	8.16e-32	down
MTFP1	1631.48	-1.13163	0.093159	5.93e-34	8.41e-32	down
VPS54	1690.51	0.791817	0.0652746	7.28e-34	1.02e-31	up
SSNA1	1228.36	-1.81855	0.150287	1.05e-33	1.47e-31	down
GAB1	926.025	1.53095	0.126617	1.18e-33	1.63e-31	up
IPO4	4304.28	-2.04873	0.169457	1.19e-33	1.65e-31	down
EXOC4	2875.7	0.868393	0.0719591	1.56e-33	2.14e-31	up
FARSA	7025.04	-1.73087	0.143446	1.59e-33	2.17e-31	down
C14orf80	876.297	-2.18436	0.181192	1.81e-33	2.45e-31	down
PMAIP1	827.75	1.47198	0.122225	2.11e-33	2.83e-31	up
BTBD6	2585.43	-1.2883	0.107371	3.62e-33	4.83e-31	down
MISP	3156.67	-1.3117	0.109389	3.95e-33	5.24e-31	down
NFKBIB	740.713	-1.43101	0.119443	4.48e-33	5.91e-31	down
ST5	1300.81	-1.18761	0.0992884	5.67e-33	7.42e-31	down
SPG11	2506.12	0.932942	0.0780127	5.84e-33	7.59e-31	up
NNMT	556.187	1.76637	0.147871	6.86e-33	8.87e-31	up
CACNB4	332.834	2.09979	0.176003	8.22e-33	1.06e-30	up
MRPS26	1632.41	-1.06682	0.0894969	9.29e-33	1.19e-30	down
HPS1	1090.78	-1.06991	0.0898396	1.06e-32	1.35e-30	down
WDR44	1829.32	1.00411	0.084432	1.29e-32	1.63e-30	up
MBTD1	1238.26	0.963033	0.0809806	1.3e-32	1.63e-30	up
APOL6	1030.47	1.09415	0.0922249	1.82e-32	2.27e-30	up
ZNF451	3096.18	0.930584	0.0785214	2.12e-32	2.62e-30	up
PNMA1	2606.29	-1.2035	0.101661	2.47e-32	3.04e-30	down
PNP	7889.11	-1.11547	0.0942423	2.54e-32	3.1e-30	down
CTDSPL	419.663	1.64929	0.139444	2.81e-32	3.42e-30	up
MSMO1	3863.81	2.37669	0.200968	2.86e-32	3.45e-30	up
STOX2	324.187	1.38577	0.11732	3.39e-32	4.07e-30	up
RUVBL2	5707.67	-1.25822	0.106564	3.58e-32	4.28e-30	down
KLF11	670.227	1.20211	0.10187	3.88e-32	4.61e-30	up
THRB	259.218	2.25108	0.190898	4.29e-32	5.07e-30	up
PUF60	5843.24	-1.63564	0.138813	4.77e-32	5.6e-30	down
PLEKHA5	1200.64	0.945184	0.0802927	5.46e-32	6.37e-30	up
CEP170	3969.92	0.862512	0.0732909	5.68e-32	6.59e-30	up
ERO1LB	225.547	2.29409	0.19504	6.11e-32	7.05e-30	up
B2M	37616.8	0.805383	0.0685592	7.29e-32	8.37e-30	up
SNRPB	10209.8	-1.23071	0.104874	8.41e-32	9.6e-30	down
PDE4D	3283.94	0.957171	0.0815827	8.68e-32	9.85e-30	up
PRPF6	5595.9	-1.08151	0.092283	1.01e-31	1.14e-29	down
NDUFA11	699.149	-1.71976	0.146845	1.11e-31	1.25e-29	down
SNRNP70	9355.05	-0.714959	0.0611543	1.42e-31	1.58e-29	down
SGTB	585.165	1.16984	0.100129	1.55e-31	1.72e-29	up
FAM171B	313.42	1.54521	0.132396	1.79e-31	1.98e-29	up
ALYREF	4271.08	-1.39045	0.119167	1.86e-31	2.04e-29	down
JX046910	595.564	-1.48005	0.126868	1.9e-31	2.07e-29	down
METTL3	3627.02	-0.901484	0.0772798	1.92e-31	2.09e-29	down
B3GALT6	1608.3	-1.35584	0.116454	2.5e-31	2.7e-29	down
AK128593	1034.64	1.62949	0.139982	2.56e-31	2.75e-29	up
ANKRD32	4086.45	0.844255	0.0726233	3.07e-31	3.28e-29	up
NAV3	189.522	1.68647	0.145128	3.24e-31	3.45e-29	up
OSBPL1A	2497.89	0.856136	0.0736936	3.36e-31	3.55e-29	up
YOD1	1637.29	1.706	0.146922	3.6e-31	3.79e-29	up
RBM14	3862.7	-1.21719	0.105008	4.56e-31	4.77e-29	down
LGALS3	2422.21	-0.97723	0.0843464	4.86e-31	5.06e-29	down
DTX3L	1311.84	0.870183	0.0751547	5.29e-31	5.49e-29	up
RHOT1	3052.35	0.903706	0.0780925	5.7e-31	5.88e-29	up
SLC27A4	2065.08	-1.11549	0.0964004	5.76e-31	5.91e-29	down
LAGE3	1063.76	-1.32418	0.114442	5.8e-31	5.92e-29	down
RPL8	55016.6	-0.975966	0.0843642	5.95e-31	6.05e-29	down
KPTN	609.986	-1.28489	0.111208	7.06e-31	7.11e-29	down
R3HDM4	1460.17	-1.33737	0.115752	7.07e-31	7.11e-29	down
RAB34	3862.01	-0.853147	0.0738578	7.28e-31	7.29e-29	down
RHBDD3	634.129	-1.74712	0.15128	7.48e-31	7.45e-29	down
SLC17A5	1147.78	1.16628	0.101001	7.63e-31	7.56e-29	up
JMJD8	983.491	-1.40683	0.121865	7.9e-31	7.8e-29	down
OPHN1	546.343	1.25482	0.108808	9.06e-31	8.9e-29	up
JHDM1D	651.166	2.21512	0.192617	1.32e-30	1.29e-28	up
FAM72B	742.166	1.05462	0.0917275	1.36e-30	1.32e-28	up
RPP25L	999.519	-1.23071	0.107065	1.4e-30	1.35e-28	down
RAB6A	4547.42	0.731315	0.0638019	2.04e-30	1.97e-28	up
PAQR5	1497.48	1.23153	0.107486	2.15e-30	2.07e-28	up
UCN2	184.454	-2.53416	0.221524	2.65e-30	2.53e-28	down
PIGQ	822.001	-1.38108	0.120824	2.94e-30	2.8e-28	down
LOC100506710	2962.66	0.970183	0.084894	3.02e-30	2.85e-28	up
SLC29A1	6879.22	-1.09485	0.0958043	3.03e-30	2.85e-28	down
TOM1L1	2740.07	1.02695	0.089968	3.54e-30	3.31e-28	up
RPS15	16404.9	-1.07723	0.0945129	4.29e-30	4e-28	down
MSRB1	1234.85	-1.02113	0.0896222	4.5e-30	4.17e-28	down
CCDC78	467.799	-1.7861	0.156916	5.11e-30	4.72e-28	down
SEC24A	4311.51	1.00079	0.0879446	5.27e-30	4.85e-28	up
DDX49	2113.66	-1.93801	0.170324	5.36e-30	4.91e-28	down
NOL12	415.795	-1.09284	0.0961059	5.82e-30	5.3e-28	down
CDC37	9568.86	-0.953306	0.0840473	8.08e-30	7.34e-28	down
LYSMD3	1531.59	1.53787	0.135626	8.4e-30	7.59e-28	up
PRKG1	133.391	3.03861	0.26801	8.54e-30	7.68e-28	up
CBX2	2651.82	-0.756084	0.0667309	9.28e-30	8.31e-28	down
WDR34	2713.48	-1.12205	0.0990582	9.63e-30	8.57e-28	down
C16orf13	1292.63	-1.1255	0.0993649	9.65e-30	8.57e-28	down
MT1E	169.624	-2.27728	0.201092	9.92e-30	8.77e-28	down
HPS3	2632.33	0.820952	0.0725654	1.13e-29	9.88e-28	up
PES1	8805.2	-1.54757	0.136796	1.13e-29	9.88e-28	down
YPEL2	356.562	1.55518	0.13747	1.13e-29	9.88e-28	up
PJA2	5234.94	1.07872	0.0954587	1.31e-29	1.14e-27	up
CSGALNACT1	852.707	1.2838	0.113697	1.45e-29	1.25e-27	up
LOXL3	255.431	-2.19343	0.194279	1.47e-29	1.26e-27	down
SFN	2728.72	-1.3999	0.124174	1.77e-29	1.52e-27	down
CHMP6	297.267	-1.55473	0.137944	1.83e-29	1.56e-27	down
KLF9	853.795	2.77242	0.24604	1.88e-29	1.6e-27	up
NDEL1	1073.06	0.97443	0.0865042	1.96e-29	1.66e-27	up
FAM207A	727.35	-1.50813	0.134019	2.24e-29	1.89e-27	down
MTHFD1	13289.9	-1.12195	0.0997341	2.33e-29	1.96e-27	down
NR1D2	1261.52	1.67593	0.149005	2.38e-29	1.99e-27	up
AHI1	2618.28	0.783909	0.0697074	2.43e-29	2.03e-27	up
POP7	2125.61	-1.25638	0.111728	2.45e-29	2.04e-27	down
DRAM2	1918.38	1.10949	0.098735	2.68e-29	2.22e-27	up
GOLGA8O	289.322	2.81361	0.250779	3.27e-29	2.69e-27	up
ONECUT2	939.853	1.55536	0.138636	3.29e-29	2.7e-27	up
WDR74	3349.86	-1.16952	0.104295	3.5e-29	2.86e-27	down
PRKAB2	2002.25	0.859778	0.076715	3.75e-29	3.05e-27	up
SOX12	1727.32	-0.767819	0.0685149	3.78e-29	3.07e-27	down
NOSIP	1162.43	-1.52762	0.136339	3.87e-29	3.13e-27	down
PTK2	4510.41	0.604156	0.0539562	4.21e-29	3.39e-27	up
FAM102B	6656.07	1.15438	0.103229	4.96e-29	3.97e-27	up
DNAAF3	1205.13	-1.43579	0.128417	5.07e-29	4.04e-27	down
AHCYL1	11914	0.755655	0.0676182	5.39e-29	4.28e-27	up
NAA10	4882.32	-0.952721	0.0852721	5.55e-29	4.39e-27	down
TTC39B	337.368	1.8751	0.167844	5.61e-29	4.42e-27	up
RPL36	12346.5	-1.2135	0.108647	5.77e-29	4.53e-27	down
PRKAR1B	1365.76	-2.43723	0.218293	6.05e-29	4.74e-27	down
TLCD1	1318.24	-1.08968	0.0976037	6.1e-29	4.75e-27	down
SURF2	1165.51	-2.16983	0.194377	6.18e-29	4.8e-27	down
CLN6	3096.55	-1.94446	0.174228	6.37e-29	4.93e-27	down
SLITRK4	98.416	-2.39176	0.21462	7.65e-29	5.89e-27	down
HMGA1	33247.2	-1.14548	0.10279	7.67e-29	5.89e-27	down
ZNF449	267.912	1.77827	0.159693	8.43e-29	6.45e-27	up
ABI2	5781.88	0.998805	0.0898261	1.01e-28	7.7e-27	up
SLC31A1	5694.4	1.11171	0.100015	1.06e-28	8.01e-27	up
BRMS1	2825.46	-1.71975	0.154873	1.2e-28	9.05e-27	down
ARFRP1	861.886	-1.37816	0.124195	1.3e-28	9.8e-27	down
DOK3	193.676	-3.3088	0.298251	1.34e-28	1.01e-26	down
ZBTB10	350.44	1.32803	0.119765	1.42e-28	1.06e-26	up
ALDH1L2	3014.85	1.85067	0.166897	1.42e-28	1.06e-26	up
SLC4A2	8893.74	-1.72751	0.155813	1.45e-28	1.08e-26	down
PINX1	640.968	-1.23554	0.111601	1.73e-28	1.28e-26	down
TRANK1	451.933	1.30748	0.118125	1.78e-28	1.31e-26	up
DDX56	7889.34	-1.24506	0.112501	1.81e-28	1.33e-26	down
MAN1A1	780.004	1.29781	0.117275	1.83e-28	1.34e-26	up
YDJC	1684.78	-1.36155	0.123113	1.98e-28	1.44e-26	down
LRWD1	779.52	-1.73604	0.157184	2.33e-28	1.69e-26	down
TMEM167B	1433.99	0.81779	0.0740691	2.43e-28	1.76e-26	up
ZNF277	1306.69	0.918171	0.0832032	2.58e-28	1.86e-26	up
THTPA	657.951	-1.47783	0.134	2.78e-28	2e-26	down
SBF2	2907.77	0.886184	0.0804048	3.01e-28	2.16e-26	up
TRMT1	4432.22	-1.6766	0.152358	3.64e-28	2.6e-26	down
GPSM2	2646.82	0.967933	0.0880216	3.97e-28	2.83e-26	up
BYSL	2745.09	-1.22163	0.111225	4.59e-28	3.26e-26	down
TROAP	9666.37	-0.792286	0.0722172	5.28e-28	3.73e-26	down
MALAT1	17424.4	2.34709	0.214167	6.01e-28	4.23e-26	up
EIF3G	5987.69	-0.981376	0.0895979	6.42e-28	4.51e-26	down
USO1	4966.67	0.726409	0.0663277	6.51e-28	4.56e-26	up
CCDC137	1567.06	-1.15904	0.105862	6.75e-28	4.69e-26	down
TMEM39A	2489.39	1.22499	0.111886	6.75e-28	4.69e-26	up
ZNF512	1657.03	0.930031	0.085009	7.39e-28	5.11e-26	up
EEF1D	14454.1	-1.17113	0.10709	7.76e-28	5.35e-26	down
NPRL3	2009.83	-1.10909	0.101569	9.3e-28	6.39e-26	down
FSTL4	227.955	-3.87168	0.35466	9.6e-28	6.58e-26	down
DDRGK1	1143.49	-1.42451	0.130504	9.72e-28	6.64e-26	down
AMDHD2	540.999	-1.94483	0.178238	1.02e-27	6.92e-26	down
EIF2B4	1647.42	-0.812364	0.0744908	1.08e-27	7.36e-26	down
LOC90784	852.624	-1.20873	0.111127	1.48e-27	1e-25	down
ERMP1	3177.39	0.945854	0.0869628	1.49e-27	1.01e-25	up
AK026379	74.3648	2.67633	0.246081	1.5e-27	1.01e-25	up
CCDC101	569.618	-1.50356	0.138254	1.51e-27	1.01e-25	down
MCTP1	809.888	1.24976	0.115053	1.74e-27	1.16e-25	up
COMMD5	800.066	-1.30631	0.120282	1.78e-27	1.18e-25	down
HSPBP1	1548.71	-1.59034	0.146552	1.96e-27	1.3e-25	down
ZNF680	632.94	1.36176	0.125515	2.01e-27	1.33e-25	up
PRMT5	8291.71	-1.75064	0.161381	2.04e-27	1.34e-25	down
GRINA	3786.09	-0.745342	0.068716	2.07e-27	1.36e-25	down
CLIP4	425.887	1.41141	0.13013	2.08e-27	1.36e-25	up
RPP25	2507.41	-1.21073	0.111634	2.09e-27	1.37e-25	down
KIAA0430	1638.3	0.80376	0.0741991	2.42e-27	1.57e-25	up
RNF19A	1420.96	1.08145	0.0998607	2.49e-27	1.62e-25	up
ETAA1	1707.16	0.84222	0.0777895	2.57e-27	1.66e-25	up
DDX39A	7747.69	-1.30046	0.120133	2.61e-27	1.68e-25	down
MED16	481.856	-2.51979	0.23279	2.64e-27	1.7e-25	down
TGFB1	3048.8	-0.87563	0.0810263	3.2e-27	2.05e-25	down
TRIP6	5566.36	-1.43316	0.132695	3.43e-27	2.19e-25	down
RHOG	1408.78	-1.07765	0.0998648	3.79e-27	2.41e-25	down
PDCD4	3858.33	1.17219	0.108654	3.91e-27	2.48e-25	up
SMIM14	268.072	1.68999	0.156675	3.98e-27	2.52e-25	up
TACC3	4438.06	-0.907367	0.0841944	4.42e-27	2.78e-25	down
P2RX7	111.446	2.01638	0.18721	4.74e-27	2.98e-25	up
PIN1	1497.22	-1.02427	0.0951309	4.93e-27	3.09e-25	down
SESN3	2692.1	1.36312	0.126677	5.28e-27	3.3e-25	up
GNE	2370.46	0.865307	0.0804177	5.31e-27	3.3e-25	up
TBC1D10B	1760.32	-0.883572	0.0821686	5.73e-27	3.55e-25	down
TRIM37	2568.3	0.716955	0.066695	5.94e-27	3.68e-25	up
ATP13A1	3638.44	-1.21194	0.112765	6.09e-27	3.76e-25	down
C16orf59	796.375	-1.01773	0.094769	6.67e-27	4.1e-25	down
PDE4DIP	2912.38	1.30739	0.121788	6.97e-27	4.28e-25	up
SSSCA1	987.014	-1.86464	0.173726	7.11e-27	4.35e-25	down
DBNL	3118.22	-1.44299	0.13454	7.74e-27	4.72e-25	down
COPB2	14077.3	0.712059	0.0664598	8.74e-27	5.31e-25	up
C9orf114	2834.18	-1.15905	0.108189	8.83e-27	5.35e-25	down
TRIM28	19391.5	-1.50116	0.14024	9.72e-27	5.87e-25	down
HSPB3	144.056	1.94151	0.181609	1.13e-26	6.78e-25	up
MEGF6	1458.17	-1.40592	0.131542	1.16e-26	6.96e-25	down
SLC19A1	802.926	-2.03072	0.190013	1.17e-26	6.99e-25	down
AIFM2	1254.26	-1.15632	0.1082	1.17e-26	7e-25	down
ZKSCAN1	2335.42	1.13567	0.106271	1.18e-26	7.01e-25	up
EGR1	6887.02	7.78743	0.730065	1.46e-26	8.64e-25	up
COL7A1	30584.4	-1.56418	0.146665	1.48e-26	8.79e-25	down
ALG1	1858.67	-1.23353	0.115666	1.49e-26	8.8e-25	down
SUSD5	1223.23	-1.91254	0.17939	1.54e-26	9.08e-25	down
SOLH	1321.95	-2.18357	0.204866	1.59e-26	9.34e-25	down
AK023809	178.797	3.45161	0.323847	1.6e-26	9.35e-25	up
PLOD2	3500.2	0.956415	0.0897964	1.73e-26	1.01e-24	up
PLEK2	972.619	-1.08143	0.10154	1.74e-26	1.01e-24	down
RBM43	199.214	1.66682	0.156667	1.96e-26	1.14e-24	up
KRI1	3218.22	-0.772064	0.0725867	2.02e-26	1.17e-24	down
PLAG1	1171.7	1.55328	0.146269	2.42e-26	1.4e-24	up
KIAA1958	318.019	1.31793	0.124133	2.48e-26	1.43e-24	up
FYTTD1	1428.14	0.994018	0.0937007	2.72e-26	1.56e-24	up
ADCK1	950.477	-0.961282	0.0906352	2.79e-26	1.6e-24	down
VPS18	1198.29	-1.08803	0.102591	2.81e-26	1.6e-24	down
CCDC85C	4488.34	-1.34349	0.126689	2.83e-26	1.61e-24	down
FAM72A	594.129	0.978527	0.0922812	2.86e-26	1.62e-24	up
C19orf25	498.736	-1.77682	0.167683	3.1e-26	1.75e-24	down
FAM72D	465.439	1.14864	0.108476	3.36e-26	1.89e-24	up
DHX16	3085.37	-0.992364	0.0938159	3.78e-26	2.13e-24	down
ELOF1	2292.57	-1.03679	0.0980253	3.82e-26	2.14e-24	down
DPP3	2462.22	-1.38456	0.130916	3.85e-26	2.16e-24	down
ATAD3B	2303.42	-1.8325	0.173299	3.93e-26	2.19e-24	down
ITGB8	1124.31	1.67201	0.158139	3.97e-26	2.21e-24	up
SH3GLB2	3701.07	-0.780902	0.0738897	4.17e-26	2.32e-24	down
SNRNP25	1793.21	-1.32125	0.125051	4.3e-26	2.38e-24	down
HPS6	924.54	-1.20978	0.114506	4.32e-26	2.38e-24	down
THOC6	1892.55	-1.21639	0.115217	4.69e-26	2.58e-24	down
C11orf54	1372.85	1.18196	0.112081	5.33e-26	2.92e-24	up
SENP7	377.569	1.34588	0.127638	5.38e-26	2.95e-24	up
USP11	3783.43	-0.900948	0.0855179	5.95e-26	3.25e-24	down
CLTB	1425.23	-1.29618	0.123176	6.77e-26	3.69e-24	down
F3	471.295	-0.987183	0.0938462	7.05e-26	3.83e-24	down
IL1RAP	291.173	1.27931	0.121676	7.44e-26	4.03e-24	up
BTN3A1	1842.48	1.73028	0.164677	8.01e-26	4.33e-24	up
RNF125	460.284	1.19646	0.113962	8.75e-26	4.71e-24	up
RASIP1	4232.68	-1.09312	0.104119	8.76e-26	4.71e-24	down
CYP1B1	3025.8	1.44036	0.137249	9.16e-26	4.91e-24	up
ADRM1	4111.9	-1.95653	0.186444	9.22e-26	4.93e-24	down
NUDT12	1104.4	0.983653	0.093748	9.35e-26	4.99e-24	up
MOCOS	3368.06	0.884328	0.0843256	9.91e-26	5.27e-24	up
SLIT2	271.296	1.25844	0.12002	1.01e-25	5.36e-24	up
MTG1	1643.59	-0.886444	0.0845649	1.04e-25	5.51e-24	down
GPAA1	2761.16	-1.12724	0.107558	1.06e-25	5.61e-24	down
TMTC2	467.09	1.50534	0.143722	1.14e-25	5.99e-24	up
SLC38A10	2092.04	-1.14505	0.109335	1.15e-25	6.04e-24	down
TUBB4B	28827.8	-1.31588	0.125786	1.3e-25	6.81e-24	down
MYBL2	8933.96	-0.879198	0.0840515	1.32e-25	6.87e-24	down
NCOA5	2224.47	-2.15094	0.206008	1.61e-25	8.39e-24	down
ITGB3BP	1568.87	0.772618	0.074041	1.72e-25	8.92e-24	up
2010-09-01	2621.58	0.690612	0.0662771	2.01e-25	1.04e-23	up
LUZP2	917.544	1.37848	0.132306	2.03e-25	1.05e-23	up
EHMT2	4824.19	-1.05504	0.101292	2.1e-25	1.08e-23	down
C9orf142	1834.43	-1.26042	0.121034	2.15e-25	1.1e-23	down
PDXDC2P	1979.59	1.69182	0.162544	2.27e-25	1.16e-23	up
TP53INP2	541.405	1.73406	0.166646	2.34e-25	1.2e-23	up
TVP23B	1469.32	0.936443	0.0900383	2.47e-25	1.26e-23	up
JMJD4	1377.21	-1.42655	0.137215	2.57e-25	1.31e-23	down
RASA2	464.05	1.30253	0.125364	2.75e-25	1.4e-23	up
MGC39372	350.148	1.66256	0.160102	2.92e-25	1.48e-23	up
FUS	19692.3	-1.03205	0.0994538	3.15e-25	1.59e-23	down
GLIS3	1697.28	1.33207	0.128395	3.23e-25	1.63e-23	up
RNASEH2C	3326.31	-0.657879	0.0634379	3.38e-25	1.7e-23	down
NOP16	5201.79	-1.3562	0.130781	3.39e-25	1.7e-23	down
C19orf24	736.662	-2.372	0.228745	3.41e-25	1.71e-23	down
SNHG17	3566.58	-0.654312	0.0631436	3.68e-25	1.84e-23	down
HIVEP2	509.229	0.968008	0.0934656	3.9e-25	1.94e-23	up
PEAK1	1311.24	0.965334	0.0933058	4.37e-25	2.17e-23	up
CDK5	1024.11	-0.95783	0.092614	4.54e-25	2.25e-23	down
WDR46	4820.92	-1.0373	0.100378	4.95e-25	2.45e-23	down
MAX	1619.75	-0.973486	0.0942051	4.96e-25	2.45e-23	down
ACP2	1467.88	-0.854667	0.0827265	5.09e-25	2.5e-23	down
FAU	10344.1	-0.974138	0.0943606	5.51e-25	2.71e-23	down
SLC38A5	4122.35	-1.3186	0.127767	5.71e-25	2.79e-23	down
C12orf10	3721.62	-0.857266	0.0832136	6.9e-25	3.37e-23	down
WDR83OS	4422.72	-0.844561	0.0820349	7.41e-25	3.61e-23	down
OTUB1	2861.57	-1.03361	0.100422	7.61e-25	3.7e-23	down
SAPCD2	2308.61	-1.29248	0.125602	7.8e-25	3.78e-23	down
PRR22	106.02	-3.64582	0.354445	8.15e-25	3.94e-23	down
MCAT	894.141	-0.918188	0.0892851	8.34e-25	4.03e-23	down
NIPSNAP3A	687.137	1.07245	0.104378	9.17e-25	4.42e-23	up
SLC25A39	10082.2	-0.886795	0.0863821	1e-24	4.82e-23	down
PIBF1	736.673	0.861607	0.083946	1.03e-24	4.92e-23	up
ZC3H11A	10993.6	0.896951	0.0874224	1.07e-24	5.11e-23	up
NANP	657.976	1.00426	0.0978892	1.08e-24	5.13e-23	up
FAM114A1	1201.08	2.01188	0.196165	1.11e-24	5.29e-23	up
CCDC86	6975.38	-1.9143	0.186674	1.13e-24	5.35e-23	down
SAC3D1	600.448	-1.30273	0.127104	1.19e-24	5.65e-23	down
DENND4A	1087.15	1.04016	0.101524	1.24e-24	5.87e-23	up
PRPF31	3480.18	-1.27762	0.124744	1.29e-24	6.07e-23	down
CD320	3511.87	-1.45214	0.141844	1.35e-24	6.33e-23	down
PALM2	526.377	1.0131	0.0990125	1.43e-24	6.69e-23	up
C20orf27	2377.07	-1.52197	0.148804	1.49e-24	6.96e-23	down
ZGPAT	741	-1.25685	0.122902	1.51e-24	7.05e-23	down
NUP62	4058.52	-1.21275	0.118594	1.52e-24	7.07e-23	down
RNF25	1000.61	-1.08953	0.106548	1.52e-24	7.08e-23	down
FUOM	419.212	-1.18302	0.11573	1.58e-24	7.32e-23	down
PTPN14	4898.35	0.789241	0.0772372	1.64e-24	7.6e-23	up
SLC6A8	4866.44	-1.37575	0.134695	1.72e-24	7.95e-23	down
ZSCAN31	801.226	1.68779	0.165325	1.81e-24	8.34e-23	up
POLR2E	5223.58	-1.4454	0.141602	1.84e-24	8.44e-23	down
BOP1	584.355	-1.72068	0.168628	1.9e-24	8.73e-23	down
MRPS2	4837.92	-1.22678	0.12033	2.08e-24	9.54e-23	down
GPS1	4489.43	-1.16075	0.113899	2.17e-24	9.93e-23	down
PTAR1	2698.85	1.72179	0.169286	2.68e-24	1.22e-22	up
FRY	117.747	1.98073	0.194754	2.69e-24	1.22e-22	up
PMF1	1188.64	-1.00744	0.0990842	2.77e-24	1.26e-22	down
LRRC14	1646.14	-1.17741	0.115836	2.86e-24	1.29e-22	down
DKFZP434I0714	283.337	1.25297	0.123329	3e-24	1.36e-22	up
RRP9	2333.91	-1.94839	0.191797	3.03e-24	1.37e-22	down
MYOM3	512.436	-1.4476	0.142507	3.05e-24	1.37e-22	down
PPP1R12B	1475.18	0.966728	0.0951711	3.06e-24	1.37e-22	up
GCNT2	1892.91	0.99953	0.0984446	3.21e-24	1.44e-22	up
SIVA1	1755.01	-2.03327	0.200312	3.3e-24	1.47e-22	down
EDF1	8108.04	-1.15642	0.11397	3.43e-24	1.53e-22	down
WDR6	8770.43	-0.949473	0.0935805	3.45e-24	1.53e-22	down
FAM214A	449.802	1.20973	0.119258	3.53e-24	1.57e-22	up
ELL2	3643.56	1.09367	0.107865	3.7e-24	1.64e-22	up
RPUSD1	1080.86	-2.31405	0.228443	4.08e-24	1.8e-22	down
EEFSEC	840.443	-1.37173	0.135427	4.11e-24	1.81e-22	down
SLC25A10	2612.35	-1.40111	0.138352	4.19e-24	1.84e-22	down
ARMC6	2036.56	-1.74565	0.172375	4.19e-24	1.84e-22	down
ZNF593	641.436	-1.35817	0.134203	4.49e-24	1.97e-22	down
HECA	777.951	1.59331	0.157565	4.88e-24	2.14e-22	up
ELOVL7	363.648	1.25543	0.124168	4.95e-24	2.16e-22	up
TOMM40	9513.11	-1.56013	0.154408	5.31e-24	2.31e-22	down
RANGAP1	7524.02	-1.24042	0.122903	5.95e-24	2.59e-22	down
RPS19BP1	1459.42	-1.56671	0.155331	6.35e-24	2.75e-22	down
BRF1	1097.51	-1.34014	0.132905	6.54e-24	2.83e-22	down
FAM27A	91.1685	-1.99472	0.197833	6.58e-24	2.84e-22	down
TOE1	1608.01	-1.1454	0.113645	6.86e-24	2.96e-22	down
MRPL4	3182.26	-1.42157	0.141068	6.97e-24	3e-22	down
LMAN1	10903.5	1.34507	0.133494	7.06e-24	3.03e-22	up
AGPAT1	3376.41	-0.62634	0.0621712	7.17e-24	3.07e-22	down
PKMYT1	1689.02	-1.28553	0.127929	9.31e-24	3.98e-22	down
LYPLA2	1325.2	-0.953569	0.0949252	9.62e-24	4.1e-22	down
FAM111A	183.821	1.34219	0.133628	9.74e-24	4.14e-22	up
AKT1	8997.81	-0.948066	0.0944049	9.91e-24	4.2e-22	down
CREBRF	179.327	1.72714	0.171983	9.91e-24	4.2e-22	up
CTBS	283.872	1.39597	0.139202	1.14e-23	4.84e-22	up
COQ4	1313.8	-0.817122	0.0815003	1.17e-23	4.94e-22	down
OSMR	4711.93	0.752161	0.075024	1.18e-23	4.95e-22	up
XRCC1	1640.87	-0.758239	0.0756679	1.24e-23	5.2e-22	down
VASH2	291.214	1.37298	0.137096	1.31e-23	5.51e-22	up
COG5	3066.4	0.73065	0.0729866	1.37e-23	5.72e-22	up
ALKBH4	620.64	-0.866963	0.0866222	1.4e-23	5.84e-22	down
LOC643699	106.855	3.75243	0.375026	1.44e-23	5.99e-22	up
SLC2A6	770.019	-1.02399	0.102341	1.44e-23	5.99e-22	down
SRM	5981.04	-1.67053	0.16699	1.47e-23	6.09e-22	down
CDIPT	1890.64	-0.672978	0.0672811	1.49e-23	6.16e-22	down
STARD4	1895.47	1.27925	0.127903	1.5e-23	6.19e-22	up
INO80E	1810.45	-0.954557	0.0954833	1.57e-23	6.47e-22	down
ALDOA	52964.6	-1.02563	0.102627	1.62e-23	6.68e-22	down
TRAPPC5	357.221	-1.64334	0.164556	1.75e-23	7.17e-22	down
RPS10	7963.87	-0.946314	0.094767	1.76e-23	7.22e-22	down
RRP1	1716.67	-1.34849	0.13505	1.77e-23	7.25e-22	down
COG3	1254.21	0.73737	0.0739692	2.09e-23	8.54e-22	up
HORMAD1	890.844	0.8392	0.0842566	2.28e-23	9.29e-22	up
MIB1	2883.91	1.32709	0.133384	2.54e-23	1.03e-21	up
LRP11	3479.32	0.872797	0.0877462	2.6e-23	1.06e-21	up
NBEAL1	706.249	1.1595	0.116595	2.66e-23	1.08e-21	up
MRPL12	750.38	-1.84175	0.185449	3.04e-23	1.23e-21	down
CISD3	1714.68	-1.13472	0.114291	3.13e-23	1.27e-21	down
ZC3H6	288.59	2.42529	0.244426	3.33e-23	1.34e-21	up
FAM195A	797.163	-1.85682	0.187251	3.54e-23	1.42e-21	down
C7orf50	1028.59	-1.46311	0.147641	3.77e-23	1.51e-21	down
CXorf38	1195.86	0.875235	0.0883224	3.78e-23	1.51e-21	up
PNPLA8	1345	0.820601	0.0828124	3.8e-23	1.52e-21	up
C19orf33	1674.41	-1.5637	0.157827	3.86e-23	1.54e-21	down
GET4	1102.33	-1.03415	0.104402	3.94e-23	1.57e-21	down
SSTR1	204.822	-3.30673	0.333895	4.02e-23	1.6e-21	down
NF2	1627.19	-0.694196	0.070097	4.03e-23	1.6e-21	down
COPB1	8927.83	0.592862	0.0598988	4.26e-23	1.69e-21	up
NUBP2	962.426	-1.53121	0.154717	4.3e-23	1.7e-21	down
PDE3A	9022.35	1.28803	0.130157	4.33e-23	1.71e-21	up
CPE	1251.15	1.05789	0.106951	4.54e-23	1.79e-21	up
U2AF2	10046.7	-1.62617	0.164592	5.08e-23	2e-21	down
PAM	4492.93	0.627607	0.0635821	5.57e-23	2.18e-21	up
STRA13	2245.3	-0.921157	0.0933866	5.97e-23	2.33e-21	down
PCMTD1	1020.61	1.06575	0.108056	6.02e-23	2.35e-21	up
PDLIM3	467.387	1.14239	0.115845	6.12e-23	2.38e-21	up
LOC100128881	2505.6	-2.01133	0.204001	6.24e-23	2.43e-21	down
GPR137	702.873	-1.22613	0.124363	6.25e-23	2.43e-21	down
ZBTB44	1898	0.833889	0.0845918	6.34e-23	2.46e-21	up
APEX2	2787.4	-0.725404	0.0736538	6.93e-23	2.68e-21	down
AXIN1	1126.11	-1.24466	0.126423	7.19e-23	2.78e-21	down
SH3BGRL	1324.4	0.971313	0.098661	7.21e-23	2.78e-21	up
YIPF6	2789.86	0.861462	0.0875515	7.61e-23	2.93e-21	up
C11orf83	600.72	-1.86375	0.189443	7.72e-23	2.96e-21	down
TUBB2A	530.659	-1.03328	0.105047	7.85e-23	3.01e-21	down
SSBP2	343.085	1.42301	0.14474	8.24e-23	3.15e-21	up
SURF6	2339.55	-1.30779	0.133042	8.37e-23	3.19e-21	down
WDR18	1523.68	-1.30201	0.1325	8.66e-23	3.3e-21	down
FAM83H	1469.72	-1.59016	0.161883	8.98e-23	3.41e-21	down
ZBTB5	1720.75	0.931128	0.0948219	9.26e-23	3.51e-21	up
HAUS7	1532.53	-1.01544	0.103426	9.42e-23	3.57e-21	down
EIF6	8423.92	-1.15156	0.117305	9.53e-23	3.6e-21	down
THOP1	4252.75	-1.30964	0.133436	9.73e-23	3.67e-21	down
HOXB7	398.088	-1.15314	0.117596	1.06e-22	4e-21	down
KIAA1324L	1460.16	0.887424	0.0905051	1.07e-22	4.02e-21	up
RANGRF	1423.09	-1.18364	0.120744	1.09e-22	4.11e-21	down
SLC25A11	4083.93	-0.809633	0.082599	1.1e-22	4.14e-21	down
SERPINI1	351.198	1.58645	0.16192	1.15e-22	4.31e-21	up
MOB1B	726.431	1.19327	0.121819	1.18e-22	4.4e-21	up
TIMM13	2393.42	-1.6666	0.170183	1.21e-22	4.5e-21	down
RHBDD1	432.074	1.17803	0.120317	1.23e-22	4.57e-21	up
CCDC85B	598.195	-2.21965	0.226719	1.24e-22	4.59e-21	down
HSDL1	2311.35	0.666827	0.0681118	1.24e-22	4.59e-21	up
GAL	3643.83	-0.805644	0.082291	1.24e-22	4.59e-21	down
AK097878	354.544	-1.36244	0.139217	1.29e-22	4.75e-21	down
LSM7	1273.77	-0.998145	0.102005	1.3e-22	4.8e-21	down
ZNF205	298.171	-1.48441	0.151745	1.34e-22	4.93e-21	down
EIF4A2	18373.1	0.845989	0.0865419	1.43e-22	5.27e-21	up
CECR5	2728.44	-0.89402	0.0914606	1.44e-22	5.29e-21	down
ZNF512B	1690.53	-1.35375	0.138652	1.61e-22	5.9e-21	down
RNF40	5345.49	-1.0921	0.111872	1.64e-22	5.98e-21	down
FAM8A1	1124.76	1.17176	0.120059	1.67e-22	6.1e-21	up
PMEPA1	1873.49	-1.43248	0.146779	1.68e-22	6.12e-21	down
LPHN2	3035.91	0.934135	0.0957175	1.68e-22	6.12e-21	up
FOXN3-AS1	147.775	-1.5313	0.15693	1.71e-22	6.19e-21	down
IDI1	4881.54	1.298	0.133056	1.75e-22	6.34e-21	up
WDR26	6094.24	0.761127	0.0780279	1.76e-22	6.37e-21	up
ASB6	1779.04	-0.857481	0.0879162	1.78e-22	6.44e-21	down
TEX264	1088.65	-0.88616	0.0908594	1.79e-22	6.44e-21	down
OTUD3	1400.71	1.04177	0.106871	1.88e-22	6.77e-21	up
PPP1CA	6041.16	-0.931383	0.095581	1.95e-22	6.99e-21	down
MALT1	921.933	0.975965	0.100166	1.97e-22	7.05e-21	up
SAFB2	2735.05	-0.840907	0.0863888	2.16e-22	7.72e-21	down
CENPB	2380.92	-1.25009	0.128458	2.21e-22	7.9e-21	down
SLC2A1	3136.79	-1.05303	0.108215	2.23e-22	7.94e-21	down
ARHGDIA	4581.24	-1.58569	0.162976	2.26e-22	8.03e-21	down
POMT2	1767.76	-0.933458	0.0960493	2.51e-22	8.92e-21	down
ELP2	3541.12	0.604572	0.0622088	2.52e-22	8.92e-21	up
FZD2	765.319	-0.959913	0.0987879	2.55e-22	9.04e-21	down
TSR2	1850.8	-0.838864	0.0863453	2.6e-22	9.17e-21	down
SEC14L1	3654.42	1.10616	0.113893	2.67e-22	9.43e-21	up
POLR3K	1773.35	-1.02723	0.105802	2.76e-22	9.72e-21	down
AK094621	547.148	1.35779	0.139924	2.91e-22	1.02e-20	up
FLJ43663	374.374	1.19886	0.12367	3.2e-22	1.12e-20	up
AMTN	302.682	-2.65825	0.274258	3.24e-22	1.14e-20	down
AJUBA	2899.06	-0.93799	0.096808	3.35e-22	1.17e-20	down
RAB12	1245.03	0.786943	0.0812829	3.61e-22	1.26e-20	up
NAV2	1073.71	-1.16105	0.119957	3.71e-22	1.29e-20	down
GCC2	1807.4	0.81425	0.084138	3.76e-22	1.31e-20	up
IMP3	2260.73	-1.15279	0.119176	3.93e-22	1.36e-20	down
HCFC1R1	1706.76	-0.8969	0.0927262	3.94e-22	1.37e-20	down
PGP	2738.07	-0.783423	0.081005	3.99e-22	1.38e-20	down
ESCO1	1384.68	0.780967	0.080768	4.07e-22	1.41e-20	up
NR4A2	407.2	2.08545	0.215693	4.1e-22	1.41e-20	up
APAF1	1373.7	0.704412	0.0728826	4.25e-22	1.46e-20	up
BIRC3	287.283	1.04293	0.107936	4.35e-22	1.5e-20	up
HEATR5A	2543.34	0.796383	0.0824214	4.36e-22	1.5e-20	up
C6orf47	865.986	-0.803826	0.0832317	4.56e-22	1.56e-20	down
ZNF397	441.357	1.08355	0.112237	4.72e-22	1.61e-20	up
TRMT61A	1340.21	-2.53509	0.262643	4.81e-22	1.64e-20	down
GRWD1	3555.38	-1.5457	0.160158	4.87e-22	1.66e-20	down
TK1	4396.16	-0.79865	0.082761	4.91e-22	1.67e-20	down
CCNG1	7610.31	0.751913	0.0779661	5.21e-22	1.77e-20	up
CBX5	20557.5	0.823308	0.0854418	5.64e-22	1.91e-20	up
DMAP1	1249.98	-0.743876	0.0772001	5.65e-22	1.91e-20	down
POLR3H	2514.34	-1.68738	0.175183	5.85e-22	1.98e-20	down
TNC	499.53	-2.94576	0.306165	6.49e-22	2.19e-20	down
SCAF1	1663.5	-1.36174	0.141559	6.61e-22	2.23e-20	down
VWA8	2123.97	0.669062	0.0695972	7.02e-22	2.36e-20	up
C7orf43	864.232	-0.896697	0.093279	7.04e-22	2.37e-20	down
DKFZp434J194	871.343	-1.44464	0.150303	7.15e-22	2.4e-20	down
ENPP1	2706.31	0.751706	0.078224	7.28e-22	2.44e-20	up
MAD2L1BP	1469.83	-0.840699	0.0875244	7.59e-22	2.54e-20	down
RPL28	20109.9	-0.878843	0.0915231	7.81e-22	2.61e-20	down
JOSD2	115.142	-2.42222	0.252344	8.08e-22	2.69e-20	down
ADD3	2673.29	1.23502	0.128664	8.09e-22	2.69e-20	up
TPRN	756.07	-1.59906	0.166592	8.1e-22	2.69e-20	down
DHTKD1	2126.86	0.822314	0.0856792	8.18e-22	2.71e-20	up
NIPAL3	706.891	1.00633	0.104882	8.4e-22	2.78e-20	up
GALNT3	140.12	2.38985	0.249131	8.58e-22	2.83e-20	up
AP4S1	400.721	-1.65834	0.172939	8.88e-22	2.93e-20	down
CAMK2D	983.883	1.0894	0.113727	9.79e-22	3.22e-20	up
BRWD1	1608.48	0.73027	0.0762696	1.02e-21	3.35e-20	up
RLIM	5862.14	0.953923	0.0996569	1.05e-21	3.44e-20	up
BET1	1423.31	0.751284	0.0785023	1.07e-21	3.5e-20	up
SEMA3C	2194.02	0.934465	0.0976527	1.08e-21	3.52e-20	up
CD2BP2	3539.11	-0.965623	0.100919	1.09e-21	3.55e-20	down
MCM5	5456.64	-1.03479	0.108245	1.18e-21	3.85e-20	down
AHSA1	12780.7	-1.27788	0.133756	1.25e-21	4.07e-20	down
BCL2L12	908.316	-1.00625	0.105351	1.28e-21	4.16e-20	down
EPN1	2727.55	-1.34587	0.140974	1.34e-21	4.34e-20	down
DHX37	2981.35	-1.918	0.200914	1.34e-21	4.35e-20	down
ATP11B	1816.86	0.881751	0.0924353	1.44e-21	4.66e-20	up
THAP7	735.177	-1.20141	0.125979	1.48e-21	4.77e-20	down
HSPA8	115607	-1.40532	0.147456	1.57e-21	5.05e-20	down
ISOC2	1689.94	-1.10135	0.115602	1.62e-21	5.21e-20	down
PLCB1	348.191	1.26308	0.132591	1.63e-21	5.25e-20	up
GOLGA4	7191.36	0.727298	0.0763943	1.73e-21	5.54e-20	up
MLLT1	4492.11	-0.991361	0.104154	1.76e-21	5.65e-20	down
SLC2A8	580.366	-1.63372	0.171645	1.77e-21	5.65e-20	down
BCAP31	7996.37	-0.659279	0.0692717	1.78e-21	5.68e-20	down
PSMF1	3244.66	-0.961598	0.101058	1.81e-21	5.78e-20	down
SAFB	5325.69	-0.931205	0.0978826	1.84e-21	5.87e-20	down
UPP1	631.682	-0.80437	0.0845693	1.88e-21	5.99e-20	down
LSMD1	1148.22	-1.04275	0.10987	2.29e-21	7.28e-20	down
TUBA4A	11261.8	-1.42211	0.149879	2.35e-21	7.44e-20	down
TSR3	1297.12	-1.45955	0.153838	2.36e-21	7.48e-20	down
CXXC4	290.328	1.43282	0.151038	2.39e-21	7.55e-20	up
MAD1L1	450.281	-1.07493	0.113351	2.47e-21	7.78e-20	down
SIRT7	817.642	-1.12033	0.118202	2.59e-21	8.15e-20	down
SLC2A4RG	2514.75	-1.15157	0.121499	2.59e-21	8.15e-20	down
REXO4	2540.88	-0.92267	0.0973931	2.7e-21	8.49e-20	down
PRPF19	13254.9	-1.45358	0.153713	3.19e-21	9.99e-20	down
SLC7A2	8164.64	1.18971	0.125849	3.28e-21	1.03e-19	up
PRKCDBP	270.033	-1.76451	0.186678	3.32e-21	1.04e-19	down
BIRC7	1655.17	-1.65657	0.175371	3.52e-21	1.1e-19	down
TRMT112	5350.03	-0.826774	0.087581	3.72e-21	1.16e-19	down
STK17B	442.166	0.904433	0.0958082	3.73e-21	1.16e-19	up
MPV17L2	1487.97	-0.849622	0.0900071	3.75e-21	1.16e-19	down
LOC283788	246.415	1.36778	0.144904	3.76e-21	1.17e-19	up
MCM2	9320.38	-0.7927	0.0839934	3.81e-21	1.18e-19	down
PMS1	1619.99	0.844333	0.089494	3.93e-21	1.22e-19	up
NOC2L	6636.86	-1.16196	0.123173	3.96e-21	1.22e-19	down
TANC1	1335.3	0.852015	0.0903502	4.1e-21	1.26e-19	up
MIF	4405.79	-1.47718	0.156663	4.14e-21	1.27e-19	down
NBEA	517.721	1.08753	0.115347	4.17e-21	1.28e-19	up
CENPC1	773.002	0.830961	0.0881497	4.23e-21	1.3e-19	up
ABCF1	9534.46	-1.0517	0.111588	4.31e-21	1.32e-19	down
ELTD1	1221.46	1.24493	0.132098	4.33e-21	1.33e-19	up
CDS1	300.291	1.41725	0.15046	4.54e-21	1.39e-19	up
CHMP1B	3856.82	1.17759	0.125042	4.62e-21	1.41e-19	up
PLEKHJ1	1392.26	-0.979152	0.103999	4.73e-21	1.44e-19	down
DNAJC12	626.463	1.13138	0.120312	5.27e-21	1.6e-19	up
PSMC3	9110.61	-1.44573	0.15374	5.27e-21	1.6e-19	down
SRGAP2D	353.122	0.995192	0.105849	5.35e-21	1.62e-19	up
KIAA1967	6218.06	-0.800973	0.0852316	5.58e-21	1.69e-19	down
GGPS1	1873.91	0.773229	0.0823115	5.78e-21	1.75e-19	up
AUP1	9064.86	-0.849649	0.0904544	5.83e-21	1.76e-19	down
PDXDC1	8393.08	0.736863	0.0784502	5.85e-21	1.76e-19	up
MRPS34	4047.17	-1.15109	0.122613	6.12e-21	1.84e-19	down
HSPA1B	2138.99	-1.72386	0.18367	6.25e-21	1.88e-19	down
PHB2	15845.9	-0.8563	0.0912582	6.4e-21	1.92e-19	down
ALDH1B1	3287.12	-0.821236	0.0875216	6.4e-21	1.92e-19	down
C17orf70	939.384	-1.39263	0.148531	6.85e-21	2.05e-19	down
COQ10B	1465.74	0.762471	0.0813573	7.13e-21	2.13e-19	up
KIFC3	1916.65	-1.29017	0.137668	7.14e-21	2.13e-19	down
C16orf91	557.58	-0.957982	0.102221	7.14e-21	2.13e-19	down
POLR2J	1761.34	-1.0811	0.115363	7.16e-21	2.13e-19	down
PKP3	1870.34	-1.48092	0.158051	7.26e-21	2.16e-19	down
INADL	1251.5	0.689735	0.0736332	7.45e-21	2.21e-19	up
RCBTB1	764.628	0.984517	0.105113	7.52e-21	2.23e-19	up
RNF150	145.019	1.74114	0.185904	7.54e-21	2.23e-19	up
NCLN	4002.45	-1.73607	0.185381	7.62e-21	2.25e-19	down
ZYX	4506.37	-1.33896	0.142992	7.68e-21	2.27e-19	down
STON1	84.9953	3.14989	0.336394	7.7e-21	2.27e-19	up
PTGS1	199.236	1.93257	0.206488	8.03e-21	2.36e-19	up
PDK1	833.429	1.2391	0.132417	8.16e-21	2.4e-19	up
SIKE1	2508.43	0.661882	0.0707352	8.19e-21	2.4e-19	up
PLSCR4	55.8371	2.42513	0.259196	8.25e-21	2.42e-19	up
PLCB3	2374.58	-0.725035	0.0775493	8.82e-21	2.58e-19	down
ALDH16A1	771.286	-1.4516	0.155327	9.15e-21	2.67e-19	down
EMD	3922.65	-0.789992	0.0845639	9.46e-21	2.76e-19	down
THAP2	255.05	1.18878	0.127325	9.95e-21	2.9e-19	up
ESPL1	4522.89	-1.01549	0.10878	1.01e-20	2.93e-19	down
NDUFB7	2061.73	-1.4132	0.151468	1.06e-20	3.07e-19	down
SCML1	1812.54	1.06347	0.113984	1.06e-20	3.07e-19	up
RING1	1900.06	-0.633879	0.0679469	1.07e-20	3.09e-19	down
CUTA	4397.25	-0.570322	0.0611966	1.17e-20	3.38e-19	down
C19orf60	557.811	-1.08204	0.116108	1.17e-20	3.39e-19	down
EHD1	1051.37	-1.02165	0.109638	1.18e-20	3.41e-19	down
AP1M2	1046.5	-1.58569	0.170295	1.26e-20	3.63e-19	down
KIAA1984-AS1	143.487	-2.27341	0.244225	1.29e-20	3.72e-19	down
RALGPS1	503.16	1.36351	0.146502	1.31e-20	3.77e-19	up
SVEP1	1648.96	1.30655	0.140401	1.33e-20	3.81e-19	up
SPHK2	394.714	-1.65379	0.177761	1.36e-20	3.89e-19	down
TCOF1	15291.2	-1.18162	0.127075	1.42e-20	4.07e-19	down
HACE1	927.659	0.867376	0.0932846	1.43e-20	4.08e-19	up
MFN1	3162.24	0.761805	0.0819647	1.48e-20	4.23e-19	up
SHARPIN	766.827	-1.11805	0.120436	1.64e-20	4.68e-19	down
R3HCC1	1131.92	-1.25129	0.134818	1.67e-20	4.76e-19	down
PRRC1	4085.69	1.18812	0.128013	1.67e-20	4.76e-19	up
LGALS1	9007.59	-0.857481	0.0924114	1.71e-20	4.85e-19	down
POLR2F	2329.9	-1.14693	0.123616	1.72e-20	4.88e-19	down
SMARCA4	8916.63	-0.891588	0.0961127	1.75e-20	4.95e-19	down
TBRG4	6941.44	-0.795086	0.0857108	1.75e-20	4.95e-19	down
C12orf52	1754.13	-0.989173	0.106661	1.79e-20	5.06e-19	down
MUS81	1920.9	-0.831884	0.0897107	1.81e-20	5.1e-19	down
LRRC61	758.848	-1.37238	0.148083	1.9e-20	5.35e-19	down
PTPN13	1939.98	0.739049	0.0797636	1.94e-20	5.45e-19	up
PPAPDC1B	1608.96	1.24352	0.134219	1.95e-20	5.48e-19	up
ARFGAP2	3180.32	-0.669983	0.0723625	2.07e-20	5.8e-19	down
NSDHL	1873.7	-0.651291	0.0703599	2.11e-20	5.91e-19	down
ZDHHC2	1476.15	0.743982	0.0803981	2.17e-20	6.06e-19	up
ITGAD	64.0035	-2.34878	0.253839	2.18e-20	6.09e-19	down
KIF22	5410.03	-0.73544	0.0794882	2.2e-20	6.13e-19	down
ZFC3H1	6147.29	1.07675	0.116389	2.22e-20	6.17e-19	up
TBL3	2232.96	-1.43564	0.155266	2.32e-20	6.46e-19	down
SGTA	2983.77	-1.34099	0.145112	2.44e-20	6.77e-19	down
CLCN5	648.173	0.969578	0.104968	2.54e-20	7.03e-19	up
NXF1	3673.16	-0.826552	0.0895247	2.64e-20	7.3e-19	down
ARMC7	349.076	-1.27738	0.138367	2.66e-20	7.35e-19	down
FAM86A	1288.03	-0.912384	0.0988862	2.79e-20	7.71e-19	down
FAM221A	66.7985	2.28044	0.247216	2.85e-20	7.85e-19	up
TXNRD2	1914.79	-1.07917	0.117003	2.88e-20	7.92e-19	down
BRSK2	246.334	-1.13069	0.122603	2.91e-20	7.99e-19	down
KIAA1109	2376.31	0.954413	0.103511	2.96e-20	8.12e-19	up
CLN8	681.514	1.30338	0.141397	3.03e-20	8.31e-19	up
EIF2B5	3523.18	-0.736388	0.0798888	3.04e-20	8.31e-19	down
SF3B4	5491.66	-1.22051	0.132413	3.04e-20	8.32e-19	down
URM1	2428.57	-0.985773	0.106977	3.12e-20	8.51e-19	down
DGCR2	1669.39	-0.855295	0.0928412	3.19e-20	8.69e-19	down
NTMT1	3374.8	-1.07521	0.116743	3.26e-20	8.88e-19	down
SPNS1	1540.22	-1.21582	0.132025	3.29e-20	8.95e-19	down
ZFYVE26	1458.61	-0.885982	0.0962366	3.38e-20	9.17e-19	down
SRP14-AS1	192.692	1.54373	0.167697	3.4e-20	9.22e-19	up
R3HDM2	1983.17	0.857112	0.0931162	3.42e-20	9.27e-19	up
WSB1	3624.35	1.47298	0.160067	3.5e-20	9.48e-19	up
DUS3L	1186.46	-1.89979	0.206464	3.53e-20	9.53e-19	down
PLEKHG4	1459.38	-1.8896	0.205546	3.82e-20	1.03e-18	down
FHL3	1088.28	-0.961876	0.104638	3.84e-20	1.03e-18	down
FRMD8	956.635	-0.88065	0.0958091	3.87e-20	1.04e-18	down
CCSAP	1127.59	0.794566	0.086467	3.96e-20	1.06e-18	up
GLTPD1	406.239	-1.55821	0.169599	4.02e-20	1.08e-18	down
SLC6A16	139.373	2.22666	0.242357	4.02e-20	1.08e-18	up
CAMLG	2443.01	0.891232	0.097041	4.15e-20	1.11e-18	up
CDC42EP2	448.015	-1.35002	0.147049	4.28e-20	1.14e-18	down
CDCA4	2300.36	-0.971986	0.105885	4.33e-20	1.15e-18	down
BCHE	150.911	1.5691	0.170958	4.38e-20	1.17e-18	up
VAMP4	392.007	1.25874	0.137167	4.45e-20	1.18e-18	up
PPARA	800.096	2.23695	0.243866	4.6e-20	1.22e-18	up
SCAMP1	1187.82	1.21371	0.132329	4.65e-20	1.23e-18	up
RASL10B	515.293	-0.914776	0.0997711	4.79e-20	1.27e-18	down
GTF2F1	3712.72	-0.888007	0.0968939	4.97e-20	1.31e-18	down
PELI1	491.416	1.51171	0.16495	4.97e-20	1.31e-18	up
BICC1	445.439	0.848487	0.0926692	5.38e-20	1.42e-18	up
TTLL12	6031.91	-1.45299	0.158728	5.49e-20	1.45e-18	down
GTF3C5	4429.88	-0.708475	0.0773986	5.51e-20	1.45e-18	down
S1PR3	1075.91	1.07452	0.117454	5.77e-20	1.52e-18	up
C19orf53	4268.28	-0.89712	0.0980674	5.8e-20	1.52e-18	down
FLVCR2	218.854	-1.38486	0.151402	5.86e-20	1.54e-18	down
NGDN	1658.29	-1.32196	0.144541	5.91e-20	1.55e-18	down
LRP6	1974.99	0.946883	0.103594	6.23e-20	1.63e-18	up
SEL1L3	1857.73	1.29415	0.141597	6.27e-20	1.64e-18	up
MFSD6	1309.57	1.14154	0.124958	6.52e-20	1.7e-18	up
AK091102	65.9294	2.86239	0.313367	6.58e-20	1.72e-18	up
KIAA2026	915.302	0.85383	0.0935305	6.92e-20	1.8e-18	up
MRPS12	2077.4	-1.5085	0.165262	6.98e-20	1.82e-18	down
UTP14A	3463.47	-1.22832	0.134644	7.33e-20	1.9e-18	down
MLLT4	1597.67	0.855602	0.0939062	8.14e-20	2.11e-18	up
CENPV	2040.99	-0.715211	0.0785366	8.49e-20	2.2e-18	down
CSNK2B	3161.24	-0.782203	0.0859199	8.72e-20	2.26e-18	down
RNASEL	298.879	1.46923	0.16147	9.11e-20	2.35e-18	up
TRPM2	304.033	-1.68934	0.185665	9.13e-20	2.36e-18	down
PPM1K	367.103	1.39964	0.153855	9.28e-20	2.39e-18	up
CALU	22222.9	0.913575	0.100469	9.63e-20	2.48e-18	up
RRS1	2346.78	-1.49211	0.164166	9.99e-20	2.57e-18	down
CARS2	3436.29	-1.44845	0.159403	1.02e-19	2.62e-18	down
GEMIN7	1187.9	-0.865547	0.0952795	1.04e-19	2.68e-18	down
BAG6	10538	-0.702628	0.0773519	1.05e-19	2.69e-18	down
FMNL2	2018.39	0.74101	0.0815777	1.05e-19	2.69e-18	up
ARL2	1148.94	-1.11677	0.122959	1.06e-19	2.71e-18	down
RANBP1	7804.86	-1.10169	0.121311	1.07e-19	2.73e-18	down
CNP	3557.52	-0.748705	0.0824429	1.07e-19	2.73e-18	down
TRIM26	2395.03	-1.20479	0.132739	1.12e-19	2.86e-18	down
DENND1B	512.033	1.10938	0.122233	1.13e-19	2.87e-18	up
FAM195B	170.856	-1.97618	0.217744	1.13e-19	2.87e-18	down
SERPINB5	60.5918	-2.35091	0.259068	1.14e-19	2.9e-18	down
DOCK2	69.3035	-5.88977	0.64909	1.15e-19	2.91e-18	down
SENP5	1936.1	0.616884	0.0679846	1.15e-19	2.91e-18	up
ANKRD39	329.592	-1.07422	0.118409	1.17e-19	2.95e-18	down
RALGAPA2	915.127	0.920259	0.101438	1.17e-19	2.95e-18	up
RASSF9	412.622	0.900644	0.0993084	1.2e-19	3.02e-18	up
FEN1	10785	-0.75697	0.0834687	1.2e-19	3.02e-18	down
TELO2	1212.36	-1.65687	0.182699	1.2e-19	3.02e-18	down
MAPK1IP1L	3892.17	-0.987252	0.108879	1.22e-19	3.06e-18	down
PSMC4	5931.01	-1.28718	0.141979	1.24e-19	3.1e-18	down
ZDHHC23	1262.41	1.13033	0.124702	1.25e-19	3.14e-18	up
IRF2BP1	663.94	-1.13646	0.125451	1.32e-19	3.3e-18	down
NAGPA	575.306	-1.14758	0.126698	1.33e-19	3.33e-18	down
TFAP4	842.917	-1.42023	0.156826	1.35e-19	3.37e-18	down
KDELR2	12877	0.917578	0.10138	1.42e-19	3.54e-18	up
ZBTB11-AS1	154.31	-1.34552	0.148686	1.44e-19	3.58e-18	down
SNAP23	1824.3	0.690892	0.07638	1.49e-19	3.71e-18	up
NBR1	3527.48	0.793669	0.0877474	1.5e-19	3.72e-18	up
MCEE	938.559	1.27506	0.140989	1.51e-19	3.76e-18	up
HDAC9	73.2466	2.52226	0.278919	1.52e-19	3.78e-18	up
LSM10	1548.14	-0.996235	0.110199	1.56e-19	3.87e-18	down
HKDC1	66.0871	-4.73343	0.524015	1.67e-19	4.13e-18	down
ARL1	2968.63	0.545888	0.0604448	1.7e-19	4.19e-18	up
PARP14	2207.93	1.27436	0.141116	1.71e-19	4.21e-18	up
C19orf70	1135.66	-1.04058	0.115258	1.74e-19	4.3e-18	down
ZNF672	1039	-0.830047	0.0919913	1.83e-19	4.5e-18	down
GLCE	3371.87	2.00972	0.222762	1.85e-19	4.55e-18	up
LOX	1205.86	1.68712	0.187085	1.92e-19	4.7e-18	up
SSBP4	978.79	-0.997485	0.110613	1.92e-19	4.71e-18	down
DOLK	962.654	-0.954768	0.105889	1.94e-19	4.75e-18	down
ERH	5726.73	-1.17364	0.130171	1.95e-19	4.77e-18	down
ANK3	490.5	1.46245	0.162214	1.96e-19	4.79e-18	up
MASTL	1474.71	0.714335	0.0792517	2e-19	4.87e-18	up
MFSD5	1978.78	-0.964528	0.107018	2.01e-19	4.9e-18	down
USP5	6061.92	-0.837586	0.0929573	2.05e-19	5e-18	down
PROS1	1143.09	0.960883	0.106645	2.06e-19	5.01e-18	up
CYBRD1	801.969	1.59999	0.177594	2.08e-19	5.04e-18	up
ABCD1	2083.88	-1.50628	0.167212	2.09e-19	5.08e-18	down
TMEM116	362.064	1.29417	0.143747	2.19e-19	5.31e-18	up
LINC00938	486.279	1.13061	0.125584	2.2e-19	5.32e-18	up
KCTD20	4545.63	0.603117	0.0670581	2.38e-19	5.76e-18	up
LY6K	2112.35	-1.8861	0.209729	2.4e-19	5.81e-18	down
MAP2K3	1441.57	-1.13126	0.12581	2.43e-19	5.86e-18	down
ZNF511	486.998	-1.24938	0.13895	2.44e-19	5.87e-18	down
CYC1	8964.81	-0.843238	0.0938088	2.5e-19	6.01e-18	down
SLC39A1	8419.11	-0.692686	0.0770657	2.51e-19	6.03e-18	down
RPS6KB2	1914.85	-1.10125	0.122569	2.59e-19	6.23e-18	down
TGIF1	1636.97	0.920834	0.102523	2.66e-19	6.39e-18	up
FZD4	832.885	1.95849	0.218182	2.8e-19	6.7e-18	up
ELOVL5	7482.73	0.878137	0.0978351	2.82e-19	6.73e-18	up
LINC00886	156.024	1.81683	0.202434	2.84e-19	6.77e-18	up
ZNF786	291.326	-1.18761	0.132362	2.9e-19	6.91e-18	down
RPS6KC1	1621.89	0.653861	0.0728745	2.9e-19	6.91e-18	up
OSBP	6458.08	0.584627	0.0651643	2.92e-19	6.96e-18	up
C6orf170	299.161	1.24176	0.138444	2.98e-19	7.09e-18	up
KIAA0895	528.098	0.849821	0.0947623	3.02e-19	7.17e-18	up
SUPT16H	17770.7	-0.9429	0.105154	3.05e-19	7.23e-18	down
PLEKHG3	832.532	-0.929459	0.10366	3.06e-19	7.26e-18	down
LPL	6356.22	0.87236	0.0973729	3.28e-19	7.75e-18	up
AAMP	4764.41	-1.16698	0.13026	3.28e-19	7.75e-18	down
KRT7	4967.8	-2.04695	0.228526	3.33e-19	7.86e-18	down
PPP2R1A	12523.1	-0.709916	0.0792595	3.34e-19	7.87e-18	down
SEMA3D	118.107	1.75947	0.19644	3.34e-19	7.87e-18	up
MAF1	2976.85	-0.64904	0.0725096	3.52e-19	8.28e-18	down
PRMT1	9724.56	-1.05801	0.118244	3.63e-19	8.53e-18	down
BAX	3109.65	-0.682376	0.0762764	3.68e-19	8.64e-18	down
SCAPER	590.74	0.904624	0.101128	3.71e-19	8.7e-18	up
TUBB6	4009.39	-0.939868	0.105084	3.75e-19	8.79e-18	down
SH3BGRL3	1746.23	-1.06375	0.118937	3.76e-19	8.8e-18	down
AK055017	82.9999	1.86509	0.208615	3.88e-19	9.06e-18	up
JAG2	3417.91	-1.19587	0.133797	3.97e-19	9.25e-18	down
ENO1	104575	-0.880745	0.0985695	4.06e-19	9.47e-18	down
ATP5D	3790.41	-1.43873	0.161134	4.31e-19	1e-17	down
LOC648987	640.174	-0.80114	0.0897355	4.35e-19	1.01e-17	down
PSMG3	2528.84	-0.769485	0.086197	4.38e-19	1.02e-17	down
LIMK2	1054.32	-0.720665	0.0807403	4.43e-19	1.03e-17	down
STK10	1130.77	-0.849743	0.0952501	4.61e-19	1.07e-17	down
TANC2	3408.04	0.76754	0.0860509	4.68e-19	1.08e-17	up
OAZ1	15674.5	-0.790921	0.088701	4.8e-19	1.11e-17	down
GNG12	2889.96	0.915835	0.10271	4.81e-19	1.11e-17	up
RPL35	28857	-0.878768	0.0986633	5.26e-19	1.21e-17	down
KIFC1	3699.05	-0.647114	0.0726909	5.47e-19	1.26e-17	down
PIKFYVE	4461.67	1.18954	0.133626	5.48e-19	1.26e-17	up
AIMP2	3211.48	-1.22213	0.137294	5.51e-19	1.27e-17	down
WNT7B	139.363	-1.56418	0.175725	5.52e-19	1.27e-17	down
SYT1	59.0322	2.36067	0.265226	5.55e-19	1.27e-17	up
FKBP14	1894.56	1.20978	0.135963	5.69e-19	1.31e-17	up
FAM63B	187.768	1.63088	0.183299	5.72e-19	1.31e-17	up
CDC25B	5739.83	-0.884879	0.0994559	5.73e-19	1.31e-17	down
EIF5A	45595.4	-1.16151	0.130572	5.81e-19	1.33e-17	down
HPDL	2241.85	-1.0826	0.121713	5.86e-19	1.34e-17	down
RAB31	7188.61	0.747024	0.0839909	5.89e-19	1.34e-17	up
PRDM11	456.615	-1.14398	0.128633	5.93e-19	1.35e-17	down
SLC25A36	3804.26	1.18408	0.133146	5.94e-19	1.35e-17	up
PLK1S1	991.922	0.85908	0.0966139	6.01e-19	1.36e-17	up
TOB1	3617.02	0.859395	0.0966574	6.05e-19	1.37e-17	up
TINF2	1136.04	-0.677154	0.0761637	6.07e-19	1.38e-17	down
DDX28	1182.92	-1.02584	0.115402	6.15e-19	1.39e-17	down
RPS5	26504.8	-0.813679	0.091543	6.19e-19	1.4e-17	down
HIRIP3	1074.94	-0.947622	0.106614	6.2e-19	1.4e-17	down
MEN1	2457.32	-0.792195	0.0891855	6.53e-19	1.47e-17	down
PFKP	7073.51	-0.868689	0.0978175	6.64e-19	1.5e-17	down
TMEM68	1135.39	0.837776	0.0943568	6.76e-19	1.52e-17	up
AX747577	107.123	-2.08782	0.235228	6.95e-19	1.56e-17	down
TIRAP	586.271	1.50117	0.169152	7.01e-19	1.58e-17	up
MUTYH	663.951	-0.810269	0.0913159	7.1e-19	1.59e-17	down
DENND5A	5431.31	0.570524	0.0643144	7.26e-19	1.63e-17	up
DCTN1	9385.25	-0.742154	0.0836736	7.34e-19	1.64e-17	down
LYRM5	350.472	1.15503	0.130235	7.39e-19	1.65e-17	up
DAPK3	905.684	-1.09326	0.123301	7.54e-19	1.68e-17	down
PDLIM7	3036.52	-1.16796	0.131726	7.54e-19	1.68e-17	down
PRR3	1831.16	-0.784365	0.0884702	7.59e-19	1.69e-17	down
MZT2B	663.865	-1.27393	0.143697	7.62e-19	1.7e-17	down
RRP12	3877.56	-1.30403	0.147136	7.81e-19	1.74e-17	down
PEX13	2051.65	0.681616	0.0769121	7.84e-19	1.74e-17	up
DHRS4L2	271.241	-1.07059	0.120816	7.9e-19	1.75e-17	down
SLC25A19	1579.23	-0.767451	0.0866553	8.27e-19	1.83e-17	down
GOLGA2	6471.61	0.86935	0.0981975	8.51e-19	1.89e-17	up
RNPS1	7867.34	-0.640172	0.0723155	8.56e-19	1.89e-17	down
DISP2	171.004	-1.26801	0.143245	8.59e-19	1.9e-17	down
FLAD1	3033	-0.80504	0.0909577	8.7e-19	1.92e-17	down
OIP5-AS1	2506.25	0.590654	0.0667605	8.96e-19	1.98e-17	up
TSSC4	526.233	-1.92954	0.218128	9.08e-19	2e-17	down
POT1	2065.53	0.651898	0.0737154	9.28e-19	2.04e-17	up
TRIM5	839.781	0.696381	0.0787601	9.42e-19	2.07e-17	up
ZNF622	2212.27	-0.884233	0.100016	9.5e-19	2.09e-17	down
SULF1	44.191	2.65734	0.300614	9.6e-19	2.11e-17	up
WDR4	1431.94	-1.03448	0.117059	9.81e-19	2.15e-17	down
TC2N	1224.57	1.59007	0.179955	9.93e-19	2.17e-17	up
EMC10	3748.05	-0.937307	0.10608	9.94e-19	2.17e-17	down
FBXW9	401.178	-1.16507	0.131875	1e-18	2.19e-17	down
FKRP	462.539	-1.33818	0.151489	1.01e-18	2.21e-17	down
NLE1	2486.43	-0.970011	0.1099	1.08e-18	2.36e-17	down
CHD8	5460	-0.767629	0.0869955	1.11e-18	2.41e-17	down
CBX8	632.213	-1.15379	0.13078	1.12e-18	2.44e-17	down
PFN1	34502.8	-1.06111	0.120358	1.18e-18	2.57e-17	down
GORAB	817.497	0.691725	0.0784742	1.2e-18	2.6e-17	up
COX16	923.416	-0.896152	0.101694	1.23e-18	2.66e-17	down
ZNHIT2	195.322	-2.01645	0.228858	1.24e-18	2.69e-17	down
PRR5	286.55	-1.48461	0.168591	1.3e-18	2.81e-17	down
NMRK1	238.62	1.56885	0.178169	1.3e-18	2.82e-17	up
MEPCE	3341.7	-1.55138	0.176196	1.31e-18	2.83e-17	down
EIF2S1	7224.61	-1.07174	0.121727	1.32e-18	2.84e-17	down
ADAM22	1080.65	0.730052	0.0829236	1.32e-18	2.85e-17	up
PTGES2	3886.25	-1.08577	0.123331	1.32e-18	2.85e-17	down
ACTB	148065	-1.15986	0.131807	1.37e-18	2.95e-17	down
SUGP1	1144.88	-0.651695	0.0741519	1.51e-18	3.25e-17	down
CCDC97	1359.7	-1.11516	0.126925	1.55e-18	3.33e-17	down
AK057657	1236.55	0.769049	0.0875689	1.6e-18	3.43e-17	up
DDX53	227.468	1.07052	0.121927	1.63e-18	3.5e-17	up
BANP	385.927	-1.0677	0.121639	1.67e-18	3.57e-17	down
ZNRD1	1774	-0.773252	0.0881023	1.68e-18	3.59e-17	down
CHMP4A	667.004	-1.28915	0.146883	1.68e-18	3.59e-17	down
HOTAIRM1	545.445	1.63543	0.186346	1.69e-18	3.6e-17	up
OPA1	7300.32	0.564134	0.0642813	1.69e-18	3.61e-17	up
CLDND1	685.709	1.00496	0.114521	1.7e-18	3.62e-17	up
KCNK3	90.8259	-1.72649	0.196822	1.76e-18	3.74e-17	down
PLA2G12A	1912.52	0.896819	0.102261	1.79e-18	3.8e-17	up
RPL18	26883.2	-0.773985	0.0882783	1.83e-18	3.87e-17	down
SRGN	2675.42	0.782928	0.089304	1.83e-18	3.89e-17	up
SAMD1	1178.16	-0.955019	0.108945	1.85e-18	3.92e-17	down
HMBS	1786.19	-0.561949	0.064113	1.87e-18	3.95e-17	down
RRP8	1371.07	-0.860535	0.0981877	1.88e-18	3.97e-17	down
IGFBP6	1128.33	-1.31546	0.150181	1.97e-18	4.15e-17	down
HDGFRP2	1516.44	-0.80209	0.091591	2e-18	4.21e-17	down
SETD5	8876.84	0.745576	0.0851685	2.06e-18	4.33e-17	up
SPICE1	1337.38	1.25891	0.14387	2.13e-18	4.47e-17	up
MORC4	1038.86	1.51531	0.173184	2.14e-18	4.49e-17	up
CLIC1	13520	-0.857037	0.0979852	2.2e-18	4.62e-17	down
SH3GL1	2797.68	-1.20035	0.137301	2.28e-18	4.78e-17	down
PSMC1	10850.7	-1.47061	0.168302	2.37e-18	4.97e-17	down
AX747537	136.915	-3.09153	0.353827	2.39e-18	4.99e-17	down
GAB2	241.811	1.77398	0.203077	2.43e-18	5.07e-17	up
CEP170B	2164.35	-1.22358	0.140081	2.44e-18	5.1e-17	down
RBM8A	6665.4	-0.788176	0.0902555	2.49e-18	5.19e-17	down
BC036382	398.095	0.85754	0.0982472	2.58e-18	5.38e-17	up
WDR81	1107.42	-1.73614	0.19897	2.65e-18	5.51e-17	down
TECPR2	788.362	-0.959973	0.110029	2.67e-18	5.55e-17	down
EXTL2	961.809	0.759266	0.0870779	2.8e-18	5.81e-17	up
LENG9	330.244	-1.51777	0.174094	2.83e-18	5.87e-17	down
PDAP1	8208.73	-0.844468	0.0968948	2.9e-18	6.01e-17	down
SNX17	2806.04	-0.727337	0.0834563	2.9e-18	6.01e-17	down
SKAP2	477.848	0.958862	0.110022	2.9e-18	6.01e-17	up
TP53I3	849.944	-1.19114	0.136724	2.99e-18	6.17e-17	down
POPDC3	766.597	0.917848	0.105367	3.01e-18	6.22e-17	up
UGGT2	2915.53	1.05485	0.12111	3.04e-18	6.28e-17	up
ADAM17	1262.87	0.860142	0.0987702	3.08e-18	6.34e-17	up
RANBP3	2204.49	-0.844031	0.0969547	3.16e-18	6.51e-17	down
ATF5	820.975	-2.52317	0.28984	3.16e-18	6.51e-17	down
MKL1	1589.92	-1.12115	0.12883	3.24e-18	6.67e-17	down
COPE	2607.23	-0.883793	0.10159	3.33e-18	6.84e-17	down
CEND1	64.7268	-2.39834	0.275719	3.36e-18	6.89e-17	down
TRAPPC2L	1858.37	-0.837781	0.0963142	3.37e-18	6.89e-17	down
NFKBIZ	382.038	1.66246	0.19115	3.4e-18	6.96e-17	up
NOP2	9812.5	-0.841948	0.0968554	3.54e-18	7.23e-17	down
PKI55	313.652	-2.04927	0.235878	3.69e-18	7.54e-17	down
MAPK8	849.938	0.741226	0.0853343	3.75e-18	7.65e-17	up
PKM	90929.9	-1.10881	0.127664	3.77e-18	7.69e-17	down
SERTAD1	221.879	-1.51546	0.174529	3.85e-18	7.84e-17	down
C19orf48	4723.24	-1.03993	0.119779	3.89e-18	7.91e-17	down
NUDC	6372.64	-1.11642	0.128602	3.92e-18	7.96e-17	down
ACOT2	367.177	-1.00231	0.115463	3.93e-18	7.98e-17	down
OGFR	1730.55	-0.946607	0.109094	4.06e-18	8.24e-17	down
NABP2	3242.84	-0.747171	0.0861397	4.17e-18	8.46e-17	down
TAGLN2	33498.8	-0.965282	0.111287	4.18e-18	8.46e-17	down
RAB40C	362.454	-1.25231	0.144391	4.21e-18	8.51e-17	down
PAN2	2287.22	1.13215	0.130612	4.4e-18	8.88e-17	up
DNAJC30	611.408	-0.91985	0.106146	4.48e-18	9.04e-17	down
TYSND1	2571.98	-0.846648	0.0977041	4.5e-18	9.07e-17	down
OGG1	1146.48	-0.92376	0.106662	4.69e-18	9.45e-17	down
MTA1	6736.22	-0.809115	0.0934493	4.79e-18	9.63e-17	down
HERC1	3153.85	0.646463	0.0746791	4.86e-18	9.77e-17	up
ZNF653	123.222	-1.54882	0.178984	5e-18	1e-16	down
C9orf69	1754.95	-1.45217	0.167863	5.11e-18	1.02e-16	down
CCDC94	878.172	-1.4186	0.164023	5.21e-18	1.04e-16	down
PATZ1	1717.82	-0.990372	0.114513	5.22e-18	1.04e-16	down
ZNF232	636.832	-0.857075	0.0991059	5.24e-18	1.05e-16	down
DNAH2	48.731	2.82366	0.326605	5.36e-18	1.07e-16	up
GALE	1556.82	-0.947285	0.109574	5.37e-18	1.07e-16	down
FSCN1	7212.94	-1.25072	0.144683	5.4e-18	1.08e-16	down
POLR2I	1034.99	-0.944601	0.109408	5.94e-18	1.18e-16	down
C7orf41	469.841	1.09445	0.126796	6.05e-18	1.2e-16	up
TIMM44	2660.58	-1.03995	0.12049	6.08e-18	1.21e-16	down
MLST8	2795.83	-1.16004	0.134413	6.11e-18	1.21e-16	down
DQ586540	187.349	1.45374	0.168467	6.18e-18	1.23e-16	up
NSUN5	1761.19	-1.33742	0.154999	6.21e-18	1.23e-16	down
PPP5C	4815.12	-0.95386	0.110558	6.26e-18	1.24e-16	down
CRELD2	985.134	-0.72616	0.0842033	6.47e-18	1.28e-16	down
METTL1	1460.63	-0.898208	0.104156	6.49e-18	1.28e-16	down
GTF2H4	1645.96	-0.571216	0.066248	6.56e-18	1.3e-16	down
TFIP11	1676.96	-1.18483	0.137417	6.57e-18	1.3e-16	down
KIAA0232	1252.79	0.813699	0.0943826	6.62e-18	1.31e-16	up
ANO6	3329.02	0.748762	0.0868639	6.7e-18	1.32e-16	up
NOL9	1096.64	-0.911705	0.105768	6.7e-18	1.32e-16	down
C7orf26	665.808	-1.01887	0.118227	6.82e-18	1.34e-16	down
GBAS	4073.55	0.643321	0.0746633	6.92e-18	1.36e-16	up
ATP11C	2794.5	0.796306	0.0924186	6.92e-18	1.36e-16	up
GIPC1	3117.91	-0.823213	0.0955718	7.08e-18	1.39e-16	down
MICALL1	1195.85	-0.749663	0.0870415	7.14e-18	1.4e-16	down
ZNF674-AS1	762.698	1.00039	0.116156	7.15e-18	1.4e-16	up
CTH	2053.46	2.20538	0.256174	7.38e-18	1.44e-16	up
P4HA1	3076.01	0.819724	0.0952519	7.58e-18	1.48e-16	up
TTC33	1379.86	0.837261	0.0972941	7.6e-18	1.48e-16	up
MTX3	2128.33	1.02915	0.119598	7.63e-18	1.49e-16	up
TNPO2	5891.9	-1.13904	0.132372	7.64e-18	1.49e-16	down
CCDC152	68.7916	-7.50451	0.872187	7.68e-18	1.49e-16	down
BC094703	300.937	2.68924	0.31255	7.69e-18	1.49e-16	up
SDHAP3	582.345	-0.79053	0.0918792	7.7e-18	1.49e-16	down
MRPL1	779.349	-2.13853	0.248823	8.36e-18	1.62e-16	down
RPS2	78034.6	-0.663149	0.0771954	8.66e-18	1.68e-16	down
PGF	1186.18	-0.949641	0.11056	8.74e-18	1.69e-16	down
MXI1	1410.99	1.31865	0.153528	8.78e-18	1.7e-16	up
IMPDH2	22843.1	-0.576714	0.0671473	8.79e-18	1.7e-16	down
UVRAG	1465.29	0.627493	0.0730756	8.93e-18	1.72e-16	up
RALY	4694.24	-0.776182	0.0903966	8.97e-18	1.73e-16	down
GNPDA2	637.231	0.837007	0.097532	9.33e-18	1.8e-16	up
CEP70	1022.63	0.87446	0.1019	9.36e-18	1.8e-16	up
HMGN4	3817.28	0.56605	0.0659779	9.54e-18	1.83e-16	up
LOC100505876	1291.55	0.695786	0.0811378	9.88e-18	1.9e-16	up
TOMM40L	1845.98	-0.819405	0.0956401	1.06e-17	2.03e-16	down
PARP9	866.109	0.9091	0.106123	1.07e-17	2.05e-16	up
MBD3	1677.61	-1.80687	0.21093	1.07e-17	2.05e-16	down
TOLLIP	372.299	-1.04575	0.122083	1.07e-17	2.05e-16	down
ARHGAP29	679.942	0.719367	0.0840069	1.1e-17	2.1e-16	up
STX17	1404.72	0.648725	0.0757717	1.11e-17	2.13e-16	up
APOPT1	1279.52	-0.857254	0.100159	1.14e-17	2.17e-16	down
WIPI1	919.195	2.38564	0.27874	1.14e-17	2.18e-16	up
LAMA4	127.444	-1.51185	0.176668	1.15e-17	2.2e-16	down
BIVM	1176.5	0.890747	0.104106	1.17e-17	2.22e-16	up
LOC100506746	95.5957	1.50362	0.175752	1.17e-17	2.23e-16	up
ZFP62	1856.23	0.857971	0.100298	1.19e-17	2.25e-16	up
LIMCH1	4619	0.743166	0.0868865	1.2e-17	2.27e-16	up
LINC00887	143.161	3.34454	0.391207	1.24e-17	2.35e-16	up
RBM23	3065.64	-0.948533	0.110949	1.24e-17	2.35e-16	down
KIAA1324	150.059	-3.28089	0.383872	1.27e-17	2.39e-16	down
FKBPL	533.766	-1.11779	0.13079	1.27e-17	2.4e-16	down
BVES	120.225	2.0255	0.237092	1.31e-17	2.47e-16	up
NPM3	4070.52	-0.824796	0.0965653	1.33e-17	2.5e-16	down
TUBB3	2629.51	-1.92351	0.225257	1.35e-17	2.55e-16	down
DCP1A	1970.16	0.714484	0.0837006	1.39e-17	2.61e-16	up
FAM115A	1646.8	0.816786	0.0956907	1.39e-17	2.62e-16	up
TMEM115	1125.62	-1.06243	0.124497	1.42e-17	2.66e-16	down
RUFY3	671.607	1.01109	0.118502	1.43e-17	2.69e-16	up
NRCAM	613.199	1.08467	0.127183	1.48e-17	2.78e-16	up
GRPEL2	1892.88	0.903431	0.105959	1.51e-17	2.84e-16	up
CPA4	6444.05	-0.956968	0.112309	1.58e-17	2.97e-16	down
FAM175A	566.387	0.863878	0.101394	1.59e-17	2.99e-16	up
MRPS28	556.496	-0.980537	0.115127	1.64e-17	3.06e-16	down
RNF41	2625.06	0.606832	0.0712689	1.67e-17	3.12e-16	up
GUK1	2156.76	-0.955776	0.112266	1.69e-17	3.15e-16	down
KRAS	2247.77	0.784941	0.0922412	1.74e-17	3.25e-16	up
FAM98C	372.882	-0.895484	0.105254	1.77e-17	3.3e-16	down
ARIH1	2858.78	0.611529	0.0718951	1.8e-17	3.36e-16	up
C9orf47	125.781	2.01892	0.237404	1.83e-17	3.4e-16	up
U2AF1	5049.19	-0.623186	0.0732893	1.85e-17	3.43e-16	down
WDR90	2084.34	-1.30713	0.153726	1.85e-17	3.43e-16	down
NSFL1C	2157.81	-1.08512	0.127621	1.85e-17	3.44e-16	down
POLR2H	3836.89	-0.647293	0.0761433	1.88e-17	3.48e-16	down
MED6	1222.51	-0.921928	0.108458	1.89e-17	3.5e-16	down
UBA1	25226	-0.64995	0.0764636	1.89e-17	3.5e-16	down
FBXL18	935.298	-0.878254	0.103326	1.9e-17	3.51e-16	down
CCDC51	1380.31	-0.673749	0.07927	1.91e-17	3.52e-16	down
IPO13	1523.66	-1.16262	0.136809	1.93e-17	3.56e-16	down
WNT10B	1802.66	-0.854279	0.100537	1.94e-17	3.58e-16	down
SCAMP3	4618.5	-0.80984	0.0953377	1.99e-17	3.66e-16	down
GNB2	6249.64	-0.987814	0.116304	2.01e-17	3.69e-16	down
LOC645513	311.185	1.01806	0.11988	2.03e-17	3.72e-16	up
PAGR1	2526.25	-0.999984	0.117759	2.03e-17	3.74e-16	down
TUFM	20382	-0.568224	0.0669595	2.14e-17	3.92e-16	down
ECE2	946.521	-1.05662	0.124545	2.18e-17	3.99e-16	down
WWC2	1792.17	0.848248	0.100005	2.21e-17	4.05e-16	up
SPOCK3	123.395	1.61272	0.190348	2.4e-17	4.4e-16	up
LOC100131564	340.933	1.96376	0.231892	2.49e-17	4.55e-16	up
HMGCS1	22050.8	1.69155	0.199782	2.52e-17	4.6e-16	up
DNLZ	156.869	-2.13135	0.251788	2.56e-17	4.68e-16	down
DTYMK	1209.32	-0.945466	0.111693	2.57e-17	4.68e-16	down
ZNF239	547.716	-1.37506	0.162453	2.58e-17	4.69e-16	down
NDST1	3193.85	-0.950204	0.112303	2.65e-17	4.82e-16	down
MPDZ	3455.36	0.9022	0.106653	2.69e-17	4.9e-16	up
NRDE2	1466.76	-0.801783	0.0947838	2.7e-17	4.9e-16	down
PSMB10	1163.41	-1.2368	0.146237	2.73e-17	4.96e-16	down
SHISA5	4115.06	-0.79339	0.0938153	2.74e-17	4.98e-16	down
EMP3	4605	-1.20622	0.142642	2.76e-17	5e-16	down
ACIN1	11586.8	-0.767723	0.090806	2.8e-17	5.07e-16	down
TNKS	2021.01	0.696737	0.0824145	2.81e-17	5.09e-16	up
C8orf58	376.174	-0.931194	0.110168	2.85e-17	5.15e-16	down
TARBP2	2191.45	-1.08358	0.128265	2.96e-17	5.35e-16	down
PTGES	1584.92	-1.37651	0.162996	3.04e-17	5.48e-16	down
AF086351	83.5225	2.0164	0.238811	3.08e-17	5.55e-16	up
NKX2-5	196.191	-1.88851	0.223678	3.09e-17	5.57e-16	down
ATP6V0D1	2625.2	-1.09411	0.12961	3.13e-17	5.64e-16	down
DNTTIP1	1821.59	-0.861706	0.102142	3.27e-17	5.88e-16	down
TBC1D15	1759.85	0.707386	0.0838603	3.3e-17	5.93e-16	up
ABT1	1131.05	-1.14455	0.135697	3.32e-17	5.97e-16	down
TMEM147	3199.31	-0.610486	0.0723842	3.34e-17	5.99e-16	down
AGTPBP1	1852.43	0.815492	0.0967102	3.39e-17	6.07e-16	up
TCEB2	3525.13	-0.992602	0.117759	3.48e-17	6.24e-16	down
ELP6	1827.92	-0.636088	0.075525	3.69e-17	6.61e-16	down
TMEM243	1098.15	0.737393	0.0875721	3.75e-17	6.7e-16	up
ATP8A1	272.078	1.56442	0.185789	3.75e-17	6.7e-16	up
TLX3	97.3529	-1.91448	0.227376	3.77e-17	6.72e-16	down
TTBK2	436.369	1.50138	0.178335	3.8e-17	6.77e-16	up
ZDHHC12	727.471	-1.52486	0.181131	3.81e-17	6.79e-16	down
ARHGAP32	637.401	0.770826	0.0915638	3.81e-17	6.79e-16	up
GPCPD1	746.415	2.15927	0.256499	3.82e-17	6.79e-16	up
MRPL14	3036.17	-0.852812	0.101312	3.84e-17	6.82e-16	down
AMN1	441.694	1.38074	0.164119	3.99e-17	7.09e-16	up
KEAP1	1051.85	-1.3546	0.16103	4.03e-17	7.14e-16	down
ANKLE1	1287.07	-0.839584	0.0998127	4.04e-17	7.16e-16	down
ERF	2004.02	-1.37303	0.163252	4.08e-17	7.22e-16	down
SCRIB	2771.48	-1.3923	0.16558	4.15e-17	7.33e-16	down
B4GALT7	710.254	-1.20195	0.142948	4.16e-17	7.35e-16	down
CLN3	1551.64	-0.836901	0.0995454	4.2e-17	7.41e-16	down
TIMM50	3668.54	-0.952787	0.113378	4.33e-17	7.63e-16	down
TUSC3	6643.09	0.646595	0.0769946	4.54e-17	8.01e-16	up
POLR1C	2526.33	-1.02897	0.122587	4.71e-17	8.29e-16	down
LINC00941	196.959	-2.22065	0.264583	4.74e-17	8.33e-16	down
TIGD5	308.296	-1.87846	0.223826	4.76e-17	8.36e-16	down
DGCR14	751.923	-1.24203	0.14801	4.8e-17	8.42e-16	down
SNHG11	399.531	-1.01453	0.12093	4.89e-17	8.57e-16	down
NR4A3	318.845	1.43139	0.170625	4.9e-17	8.59e-16	up
LOC79015	262.92	2.17119	0.258859	4.97e-17	8.69e-16	up
ABCF3	2883.4	-0.669466	0.0798177	4.97e-17	8.69e-16	down
PPP1R15B	6447.47	0.889242	0.106021	4.97e-17	8.69e-16	up
CDR2	2046.42	0.793965	0.0946817	5.05e-17	8.81e-16	up
CLPTM1	3925.38	-1.09688	0.130817	5.08e-17	8.87e-16	down
PEPD	1519.92	-0.962014	0.114735	5.09e-17	8.87e-16	down
NRGN	224.492	-1.20724	0.144009	5.16e-17	8.99e-16	down
KIAA0825	1588.26	0.851469	0.101581	5.2e-17	9.05e-16	up
CLCN3	2703.36	0.763926	0.0911415	5.21e-17	9.07e-16	up
PRKCI	4594.83	0.853386	0.101826	5.25e-17	9.13e-16	up
ZHX3	1823.07	0.698273	0.0833624	5.46e-17	9.48e-16	up
GLRB	205.386	1.52484	0.182128	5.65e-17	9.8e-16	up
FBXL19	1043.82	-0.956589	0.11426	5.66e-17	9.81e-16	down
PCMTD2	1804.28	0.575473	0.0687455	5.71e-17	9.89e-16	up
DDX54	4514.24	-1.04734	0.125134	5.77e-17	9.99e-16	down
CDC14B	968.443	0.996941	0.119121	5.8e-17	1e-15	up
RRP36	3146.98	-0.782212	0.093485	5.9e-17	1.02e-15	down
RPS9	22886	-0.776805	0.0928433	5.92e-17	1.02e-15	down
TRAF2	2355.65	-0.869298	0.103936	6.07e-17	1.05e-15	down
NDUFS8	2534.77	-1.10928	0.132665	6.19e-17	1.07e-15	down
SLC37A3	1206.37	0.938136	0.112221	6.29e-17	1.08e-15	up
CNOT6	4458.84	0.657118	0.0786062	6.29e-17	1.08e-15	up
MRP63	1147.94	-0.802503	0.0960108	6.35e-17	1.09e-15	down
SNHG7	2997.33	-0.910564	0.108982	6.53e-17	1.12e-15	down
AK054970	469.332	0.880156	0.105347	6.55e-17	1.12e-15	up
C12orf45	1048.84	-1.1367	0.136146	6.88e-17	1.18e-15	down
LRRC47	2567.09	-0.868161	0.103992	6.92e-17	1.19e-15	down
UFM1	2040.35	0.848609	0.101661	6.98e-17	1.19e-15	up
ANKRD54	872.164	-0.772076	0.0925433	7.25e-17	1.24e-15	down
KIF18B	3277.95	-0.766706	0.091919	7.36e-17	1.26e-15	down
HOOK1	695.11	0.88155	0.105689	7.37e-17	1.26e-15	up
CSRP2BP	271.033	-1.39958	0.167805	7.4e-17	1.26e-15	down
MRTO4	3946.81	-1.2629	0.151425	7.43e-17	1.27e-15	down
ATP6V0C	352.226	-2.19299	0.262978	7.49e-17	1.28e-15	down
ZC3H4	1514.18	-1.46997	0.1763	7.56e-17	1.29e-15	down
PTMS	10632.7	-0.708289	0.0850172	8.01e-17	1.36e-15	down
TTC37	6401.93	0.776122	0.0932167	8.36e-17	1.42e-15	up
LPP	2067.91	0.785235	0.0943433	8.56e-17	1.45e-15	up
PPP4C	3374.11	-0.707658	0.0850324	8.63e-17	1.46e-15	down
C1orf86	529.519	-1.01583	0.122175	9.21e-17	1.56e-15	down
CLCN2	1067.6	-0.897215	0.107917	9.26e-17	1.57e-15	down
LMBRD1	808.849	0.67458	0.0811439	9.3e-17	1.57e-15	up
PHLDA3	150.601	-1.22202	0.147009	9.37e-17	1.58e-15	down
DNAJC5	2200.44	-0.728114	0.087642	9.75e-17	1.65e-15	down
TOX4	2962.19	-0.774577	0.0932604	9.94e-17	1.68e-15	down
BIN3	603.763	-1.01951	0.122844	1.05e-16	1.77e-15	down
H2AFX	1084.35	-1.59122	0.191751	1.06e-16	1.78e-15	down
EPG5	916.984	0.701272	0.0845257	1.07e-16	1.8e-15	up
AAAS	4846.2	-0.614043	0.0740218	1.08e-16	1.82e-15	down
SMPD2	1141.8	-0.820597	0.0989327	1.09e-16	1.83e-15	down
ATP6V0E2	538.65	-0.928918	0.111999	1.1e-16	1.84e-15	down
SYDE1	1311.76	-0.706303	0.0851802	1.11e-16	1.87e-15	down
RIN1	1303.78	-1.54766	0.186719	1.14e-16	1.92e-15	down
LCA5	182.001	1.88036	0.226946	1.18e-16	1.97e-15	up
TBC1D23	1309.04	0.853296	0.10304	1.22e-16	2.04e-15	up
SRF	2164.52	-0.875358	0.105713	1.23e-16	2.05e-15	down
BRAT1	1515.93	-1.25287	0.151355	1.26e-16	2.1e-15	down
BIN1	1446.98	-0.823823	0.0995268	1.26e-16	2.1e-15	down
DNAH6	38.8107	3.00156	0.362696	1.28e-16	2.13e-15	up
ACTR5	806.859	-0.926892	0.112039	1.31e-16	2.18e-15	down
MSL2	1205.48	0.681728	0.0824184	1.32e-16	2.2e-15	up
UBALD1	463.581	-1.29317	0.15637	1.34e-16	2.23e-15	down
LOC100527964	523.307	-1.10446	0.13357	1.35e-16	2.25e-15	down
FAM189B	4388.54	-0.607018	0.0734462	1.4e-16	2.32e-15	down
IFT80	1349.7	0.670282	0.0811165	1.42e-16	2.35e-15	up
FTSJ3	7679.62	-0.948361	0.114777	1.42e-16	2.36e-15	down
CACUL1	3383.06	0.598195	0.0724346	1.48e-16	2.45e-15	up
GPX1	3842.52	-1.55929	0.188842	1.49e-16	2.47e-15	down
TBCD	2994.49	-0.835571	0.101196	1.49e-16	2.47e-15	down
LINC00689	1114.81	1.42341	0.172398	1.5e-16	2.48e-15	up
ATP6V0B	4002.42	-0.836212	0.101288	1.51e-16	2.49e-15	down
UNC45A	3243.3	-0.57448	0.0695926	1.52e-16	2.51e-15	down
TBCC	711.961	-0.754198	0.0913794	1.54e-16	2.54e-15	down
SF3B5	2672.8	-0.854668	0.103601	1.59e-16	2.62e-15	down
ANKIB1	3835.84	0.958824	0.116256	1.62e-16	2.66e-15	up
EIF3B	20369.8	-0.878687	0.106549	1.63e-16	2.68e-15	down
NNT	8108.5	0.682567	0.0827871	1.65e-16	2.72e-15	up
SETD5-AS1	1061.97	0.909447	0.110336	1.69e-16	2.77e-15	up
CYB561D2	864.693	-0.849803	0.103238	1.85e-16	3.03e-15	down
ROMO1	1635.16	-0.797452	0.0969348	1.92e-16	3.16e-15	down
TMEM194A	2827.2	0.971558	0.11811	1.94e-16	3.18e-15	up
NUDT16L1	671.426	-1.0196	0.124004	2e-16	3.27e-15	down
EGF	56.274	2.49912	0.304002	2.02e-16	3.31e-15	up
FIS1	2809.63	-0.669301	0.0814337	2.05e-16	3.36e-15	down
RPLP2	14414	-0.751335	0.0914229	2.07e-16	3.37e-15	down
ARL17A	626.998	1.27357	0.15497	2.07e-16	3.37e-15	up
DAZAP1	7364.9	-0.796016	0.0968926	2.11e-16	3.45e-15	down
B3GNT2	647.818	0.681057	0.082961	2.22e-16	3.62e-15	up
INSIG1	5556	1.69289	0.206263	2.26e-16	3.68e-15	up
DTNA	818.383	0.66925	0.0815553	2.29e-16	3.72e-15	up
RNPC3	619.489	1.2504	0.152493	2.41e-16	3.92e-15	up
BAIAP2	928.23	-1.34155	0.163614	2.41e-16	3.92e-15	down
THEM6	1255.62	-1.50599	0.183721	2.46e-16	3.99e-15	down
LMNA	9903.86	-1.3436	0.163911	2.46e-16	3.99e-15	down
CHCHD5	427.893	-0.996561	0.121625	2.53e-16	4.1e-15	down
EBNA1BP2	8037.81	-1.41804	0.173085	2.55e-16	4.13e-15	down
SEPSECS	489.109	0.89128	0.108803	2.58e-16	4.17e-15	up
IER2	4033.41	1.81664	0.221772	2.58e-16	4.17e-15	up
CCDC22	590.221	-0.908544	0.11095	2.64e-16	4.26e-15	down
PSD3	1695.89	0.959044	0.117199	2.77e-16	4.47e-15	up
POLI	448.773	1.02132	0.124815	2.78e-16	4.48e-15	up
LRBA	3466.48	0.634897	0.0775994	2.8e-16	4.51e-15	up
LAMB2P1	55.2049	3.09469	0.37829	2.82e-16	4.54e-15	up
GRAMD1C	93.1814	2.10919	0.257827	2.82e-16	4.54e-15	up
BC009735	772.364	3.38187	0.413493	2.87e-16	4.61e-15	up
SUPT5H	5807.74	-0.625953	0.0765339	2.87e-16	4.61e-15	down
COMT	2468.53	-0.959516	0.117323	2.88e-16	4.62e-15	down
NCOA3	3039.66	0.697975	0.0853508	2.89e-16	4.64e-15	up
PGAP2	1395.18	-0.79115	0.096757	2.92e-16	4.68e-15	down
CLPP	1953.94	-0.737971	0.0902628	2.94e-16	4.71e-15	down
FAM129B	8681.68	-0.779224	0.0953315	2.99e-16	4.78e-15	down
TRABD	1573.95	-1.14766	0.140421	3.01e-16	4.81e-15	down
KRT80	5050.92	-1.70146	0.208196	3.02e-16	4.83e-15	down
ATP6V1F	3042.66	-0.75302	0.0921609	3.07e-16	4.89e-15	down
CLYBL	623.589	1.19792	0.146643	3.11e-16	4.96e-15	up
UHRF1	3727.27	-1.50547	0.18441	3.25e-16	5.18e-15	down
NELL2	2450.22	1.24914	0.153048	3.3e-16	5.26e-15	up
PMVK	885.741	-1.04867	0.128552	3.42e-16	5.44e-15	down
IMP4	2014.58	-1.0965	0.134416	3.42e-16	5.44e-15	down
WDR5B	588.558	1.09505	0.134292	3.51e-16	5.59e-15	up
ZNF195	2001.15	-0.75764	0.0929593	3.63e-16	5.77e-15	down
RNF216P1	993.82	-0.903207	0.11086	3.72e-16	5.91e-15	down
IRAK1	9894.19	-1.47445	0.181096	3.89e-16	6.17e-15	down
XPR1	2314.19	0.680797	0.0836179	3.9e-16	6.17e-15	up
JPH1	1722.15	0.750986	0.0922397	3.9e-16	6.17e-15	up
DYNC1H1	38244.2	-0.613756	0.0753904	3.92e-16	6.2e-15	down
RNF43	612.862	-0.871503	0.107084	4e-16	6.33e-15	down
POLE4	1533.26	-0.987231	0.121327	4.05e-16	6.4e-15	down
FBXO30	1716.68	1.35573	0.166623	4.07e-16	6.42e-15	up
CD81	3942.66	-0.857333	0.10537	4.07e-16	6.42e-15	down
PSMA6	1591.57	-1.01995	0.125367	4.1e-16	6.45e-15	down
SLC22A5	1664.32	0.775603	0.0953392	4.11e-16	6.48e-15	up
DDN	2651.24	-1.34536	0.165466	4.27e-16	6.71e-15	down
SPSB2	258.046	-1.04478	0.128498	4.27e-16	6.71e-15	down
CASC4	2042.33	0.931077	0.114526	4.3e-16	6.75e-15	up
RECQL4	1759.82	-1.0392	0.127833	4.32e-16	6.77e-15	down
MED22	2533	-0.795542	0.0978611	4.32e-16	6.77e-15	down
BCL6B	496.685	-1.17582	0.144653	4.34e-16	6.81e-15	down
GK5	1901.61	1.01392	0.124764	4.41e-16	6.91e-15	up
EXOSC5	1125.57	-1.24602	0.153328	4.42e-16	6.91e-15	down
POLD2	10026.6	-0.621248	0.0764484	4.42e-16	6.92e-15	down
MBLAC1	55.8116	-2.03799	0.25083	4.47e-16	6.99e-15	down
MBNL2	2140.57	1.40038	0.172375	4.51e-16	7.04e-15	up
ARRDC3	863.205	1.47892	0.182065	4.55e-16	7.09e-15	up
PSMA7	11362.1	-1.01954	0.125518	4.56e-16	7.11e-15	down
SIRT6	476.674	-1.15943	0.142754	4.59e-16	7.15e-15	down
TNIP2	743.456	-0.799464	0.098435	4.6e-16	7.15e-15	down
ERRFI1	436.281	1.16864	0.14391	4.64e-16	7.21e-15	up
CMTM4	1489.09	0.714865	0.0880561	4.73e-16	7.35e-15	up
C14orf166	7274.3	-0.789706	0.0973185	4.87e-16	7.57e-15	down
PSMD8	6070.68	-0.814596	0.100452	5.09e-16	7.9e-15	down
PSMD3	8092.58	-1.03844	0.128077	5.15e-16	7.98e-15	down
NT5DC2	6765.41	-0.596277	0.0735477	5.17e-16	8.02e-15	down
DCTPP1	3438.31	-1.08416	0.133807	5.39e-16	8.34e-15	down
AKAP9	3508.73	0.8422	0.103946	5.39e-16	8.34e-15	up
DKFZp667P0924	160.422	1.38995	0.171627	5.56e-16	8.59e-15	up
SLC52A2	1756	-1.38614	0.171171	5.59e-16	8.63e-15	down
ACTR3B	1046.38	-0.83015	0.10252	5.61e-16	8.66e-15	down
SLC22A20	74.5476	-2.36179	0.291894	5.91e-16	9.11e-15	down
DCAF4	724.258	-0.765854	0.0946663	5.96e-16	9.19e-15	down
CBL	2259.09	0.602643	0.0745533	6.3e-16	9.7e-15	up
SF3A2	2589.89	-1.19564	0.14794	6.38e-16	9.81e-15	down
PRKAR2B	239.796	1.17924	0.145913	6.38e-16	9.82e-15	up
PLEKHA8	1301	0.711631	0.0880735	6.48e-16	9.95e-15	up
GATAD2A	3831.48	-1.00379	0.124236	6.49e-16	9.97e-15	down
CNOT6L	706.579	0.806582	0.0998335	6.52e-16	1e-14	up
FPGS	2551.67	-0.793057	0.0981682	6.55e-16	1e-14	down
ZBTB26	531.975	1.07067	0.132538	6.57e-16	1.01e-14	up
SNRPC	6147.12	-1.08058	0.13382	6.75e-16	1.03e-14	down
TRAPPC11	1550.78	0.562282	0.069644	6.82e-16	1.04e-14	up
PNRC1	1754.34	0.676072	0.083752	6.9e-16	1.05e-14	up
NTHL1	1059.23	-1.10506	0.13692	6.98e-16	1.07e-14	down
BCS1L	2544.02	-1.10152	0.13652	7.11e-16	1.09e-14	down
KIF13A	2822.45	0.720537	0.0893044	7.13e-16	1.09e-14	up
IGSF9	99.0939	-1.71477	0.212642	7.38e-16	1.12e-14	down
MFSD10	755.902	-1.02372	0.126955	7.41e-16	1.13e-14	down
GDPD1	335.608	1.82658	0.226565	7.5e-16	1.14e-14	up
SDC1	1560.54	-0.687635	0.0853817	8.04e-16	1.22e-14	down
GBA	2429.98	-0.888054	0.110315	8.27e-16	1.26e-14	down
PEMT	897.442	-1.08602	0.134991	8.62e-16	1.31e-14	down
TSEN15	2138.95	0.640793	0.0796677	8.74e-16	1.33e-14	up
IPP	376.354	0.80154	0.0996892	8.96e-16	1.36e-14	up
LOC643401	2134.3	1.22187	0.151987	9.03e-16	1.37e-14	up
FAM69A	342.571	1.18138	0.146976	9.14e-16	1.38e-14	up
MYO9A	915.455	1.08505	0.135024	9.29e-16	1.4e-14	up
NT5C	1255.31	-0.910311	0.113314	9.47e-16	1.43e-14	down
RASSF7	246.182	-1.17928	0.146796	9.48e-16	1.43e-14	down
IGIP	292.106	1.32379	0.164816	9.6e-16	1.45e-14	up
TBCB	2089.93	-0.780072	0.0971238	9.61e-16	1.45e-14	down
BCL2L13	3324.91	0.487983	0.0607694	9.74e-16	1.47e-14	up
OXA1L	7789.57	-0.641451	0.0798884	9.8e-16	1.48e-14	down
VARS	11942.3	-0.681282	0.0848519	9.82e-16	1.48e-14	down
CPNE1	8190.18	-0.551353	0.068675	9.87e-16	1.48e-14	down
KLHL15	1326.83	1.28101	0.159566	9.9e-16	1.49e-14	up
EFHD2	1377.52	-0.9276	0.115545	9.91e-16	1.49e-14	down
PDP1	460.951	0.899495	0.112055	9.97e-16	1.5e-14	up
PDE5A	139.34	1.56639	0.195159	1.01e-15	1.51e-14	up
AK094188	267.826	1.56354	0.194817	1.01e-15	1.51e-14	up
HDHD1	419.27	-1.26035	0.15704	1.01e-15	1.51e-14	down
TMEM167A	5908.64	0.819125	0.10208	1.02e-15	1.53e-14	up
CYHR1	534.402	-0.905268	0.112824	1.03e-15	1.53e-14	down
CPSF3L	2810.12	-0.77896	0.0971118	1.05e-15	1.56e-14	down
CGB5	104.621	-3.40214	0.424154	1.05e-15	1.57e-14	down
ZBTB41	727.883	1.47122	0.183467	1.07e-15	1.59e-14	up
FAM122C	140.479	1.53524	0.191506	1.09e-15	1.62e-14	up
AATF	5287.52	-1.10864	0.138305	1.09e-15	1.63e-14	down
UBAC1	3206.91	-0.627838	0.0783449	1.11e-15	1.66e-14	down
LINC00473	4373.95	1.62866	0.203243	1.12e-15	1.66e-14	up
AK1	2215.65	-0.687895	0.0858581	1.13e-15	1.68e-14	down
SAV1	1067.67	-0.613658	0.0766242	1.16e-15	1.72e-14	down
RNF168	1574.1	0.697629	0.0871171	1.17e-15	1.73e-14	up
PAPSS2	1210.1	1.29754	0.162032	1.17e-15	1.73e-14	up
PHB	14231.8	-0.974168	0.121651	1.17e-15	1.73e-14	down
DDX27	6979.84	-1.05218	0.131398	1.17e-15	1.73e-14	down
TTLL7	300.896	1.1669	0.145726	1.17e-15	1.73e-14	up
C4orf21	1153.62	1.3851	0.173021	1.19e-15	1.76e-14	up
PSMD4	9121.14	-0.881137	0.110089	1.21e-15	1.78e-14	down
LRR1	1762.35	-0.9041	0.112992	1.23e-15	1.82e-14	down
SAMD9L	119.273	1.73635	0.217045	1.24e-15	1.84e-14	up
TFR2	1129.41	-0.649734	0.0812179	1.25e-15	1.84e-14	down
DCP2	2996.59	0.638664	0.0798447	1.26e-15	1.85e-14	up
GTF3C3	5179.09	0.592	0.0740146	1.26e-15	1.86e-14	up
PPIF	8837.27	-0.825058	0.103198	1.3e-15	1.91e-14	down
CLDN12	2122.7	0.743281	0.0930035	1.33e-15	1.95e-14	up
HNF4A	96.3656	-2.68025	0.335406	1.34e-15	1.97e-14	down
SLC25A45	119.152	-1.32073	0.165321	1.36e-15	2e-14	down
NAPA	2781.37	-0.824917	0.103269	1.37e-15	2.01e-14	down
SLC29A3	348.138	-0.985945	0.123428	1.37e-15	2.01e-14	down
ZNF33B	2587.03	0.749408	0.093857	1.41e-15	2.07e-14	up
PIAS4	487.667	-1.06352	0.133218	1.42e-15	2.09e-14	down
GPATCH4	6586.82	-1.36936	0.171582	1.45e-15	2.13e-14	down
MRPL17	4468	-0.618411	0.077512	1.48e-15	2.17e-14	down
UBTF	6312.4	-0.987956	0.12384	1.49e-15	2.18e-14	down
SMARCB1	3758.15	-0.87281	0.109408	1.49e-15	2.18e-14	down
ARF6	2091.6	-0.788512	0.0988478	1.5e-15	2.19e-14	down
MZT1	1212.92	0.870323	0.109106	1.5e-15	2.19e-14	up
SCAMP2	2066.04	-0.582755	0.0730585	1.5e-15	2.19e-14	down
CTNS	821.606	-0.649296	0.0814081	1.51e-15	2.2e-14	down
MTG2	1620.07	-1.11226	0.139493	1.54e-15	2.24e-14	down
LINC00894	238.242	1.47656	0.185364	1.64e-15	2.39e-14	up
ST6GALNAC2	36.6184	3.17543	0.398644	1.64e-15	2.39e-14	up
RDH10	2729.51	1.14442	0.143675	1.65e-15	2.39e-14	up
TIMM22	1478.13	-0.818099	0.102712	1.65e-15	2.4e-14	down
TPI1	42482.3	-0.714848	0.089752	1.66e-15	2.4e-14	down
BC033949	162.588	-1.41776	0.178026	1.67e-15	2.42e-14	down
LMNB2	5176.46	-1.15999	0.14566	1.67e-15	2.42e-14	down
RPS6KA2	83.3223	-1.63319	0.205087	1.67e-15	2.42e-14	down
RPS6KA4	1885.79	-1.43582	0.180336	1.69e-15	2.45e-14	down
KIAA1984	76.147	2.54177	0.319355	1.73e-15	2.5e-14	up
IL11	1438.78	-1.25889	0.158218	1.77e-15	2.55e-14	down
CUEDC1	1090.38	-0.604214	0.0759653	1.81e-15	2.61e-14	down
ADPRHL2	1083.99	-0.742543	0.0933759	1.83e-15	2.64e-14	down
AKT1S1	2599.76	-0.914581	0.115017	1.84e-15	2.65e-14	down
FBXL5	1022.51	0.696017	0.0875382	1.85e-15	2.66e-14	up
GPR133	416.614	1.60386	0.201724	1.85e-15	2.67e-14	up
ABCA1	214.114	1.51521	0.190578	1.86e-15	2.67e-14	up
CCNYL1	1817.76	0.73073	0.0919262	1.88e-15	2.7e-14	up
RIC8A	3099.95	-0.862163	0.10848	1.9e-15	2.73e-14	down
JAK2	384.229	0.904381	0.11381	1.92e-15	2.75e-14	up
WDR73	1121.08	-0.893291	0.112456	1.97e-15	2.82e-14	down
S100PBP	1545.11	0.703582	0.0886278	2.04e-15	2.93e-14	up
TRMT5	1169.4	-0.670057	0.0844356	2.09e-15	3e-14	down
MPDU1	3858.09	-1.00548	0.126731	2.12e-15	3.03e-14	down
SIRT2	1094.8	-0.57467	0.0724667	2.19e-15	3.13e-14	down
NDUFS6	5010.58	-0.707169	0.0891763	2.19e-15	3.13e-14	down
RNF187	4803.21	-0.783543	0.0988168	2.2e-15	3.15e-14	down
VTI1B	2526.16	-0.898674	0.113372	2.25e-15	3.21e-14	down
AK126539	129.217	2.15612	0.272041	2.27e-15	3.23e-14	up
WNT5A	954.206	0.901921	0.113797	2.27e-15	3.23e-14	up
DQ581019	5269.71	-0.852507	0.107567	2.27e-15	3.24e-14	down
CHERP	2867.35	-1.24359	0.156928	2.29e-15	3.26e-14	down
TSPAN4	767.463	-1.47682	0.186437	2.35e-15	3.34e-14	down
BAZ2B	736.451	0.837074	0.105688	2.37e-15	3.37e-14	up
AP5Z1	692.231	-1.68865	0.213319	2.45e-15	3.48e-14	down
ZDBF2	1559.24	1.29294	0.163345	2.47e-15	3.5e-14	up
MKX	83.1146	1.8981	0.239832	2.49e-15	3.52e-14	up
PHRF1	1084.14	-1.18093	0.149238	2.51e-15	3.56e-14	down
DNAJA1	16257.8	-1.30714	0.16519	2.51e-15	3.56e-14	down
PRCC	3738.89	-0.823821	0.104113	2.52e-15	3.56e-14	down
FEM1A	1564.58	-0.962839	0.121684	2.52e-15	3.56e-14	down
METTL7B	307.36	-0.949101	0.120014	2.61e-15	3.69e-14	down
ATAD3A	1938.45	-1.34623	0.17025	2.63e-15	3.71e-14	down
RHOU	542.037	0.780563	0.0987346	2.66e-15	3.76e-14	up
PUSL1	956.088	-0.942821	0.119259	2.67e-15	3.76e-14	down
TMEM136	811.486	1.38236	0.174859	2.67e-15	3.76e-14	up
ZBTB45	217.389	-1.3886	0.17575	2.77e-15	3.89e-14	down
TNK1	345.196	-0.958602	0.121368	2.83e-15	3.98e-14	down
DNAJB2	1092.49	-0.812465	0.102875	2.84e-15	4e-14	down
FJX1	1161.92	-1.44229	0.182625	2.84e-15	4e-14	down
TMEM56	479.233	1.03056	0.130515	2.88e-15	4.04e-14	up
AF086154	28.4091	4.32151	0.547363	2.9e-15	4.07e-14	up
SWSAP1	103.93	-1.69697	0.214951	2.91e-15	4.08e-14	down
SMTN	1121.21	-0.918987	0.116416	2.93e-15	4.1e-14	down
TRIM38	775.866	0.786179	0.0996026	2.95e-15	4.12e-14	up
SOS2	740.455	0.69589	0.0881794	2.98e-15	4.17e-14	up
AK022915	553.439	1.17821	0.149297	2.98e-15	4.17e-14	up
PLCB4	1137.31	0.736616	0.0933508	3e-15	4.19e-14	up
LOC100093631	178.902	1.50911	0.19125	3e-15	4.19e-14	up
RBM10	3738	-0.781416	0.0990616	3.07e-15	4.28e-14	down
HOXA7	124.375	-1.36588	0.17316	3.07e-15	4.28e-14	down
SNAPC2	369.179	-0.982306	0.124565	3.12e-15	4.35e-14	down
C4orf33	373.48	0.944629	0.119813	3.17e-15	4.41e-14	up
PCNA	7516.62	-0.656841	0.0833214	3.19e-15	4.44e-14	down
DNAJC13	3472.17	0.561933	0.0712868	3.2e-15	4.45e-14	up
ZNF335	1790.97	-0.789717	0.100193	3.22e-15	4.48e-14	down
RPS28	7891.63	-1.21158	0.153794	3.33e-15	4.62e-14	down
POP1	2299.17	-1.30504	0.165695	3.38e-15	4.68e-14	down
LMAN2	5835.69	-0.810699	0.10295	3.42e-15	4.74e-14	down
ZNF839	1108.12	-0.628614	0.0798333	3.43e-15	4.76e-14	down
MON1A	464.116	-1.21703	0.154569	3.44e-15	4.77e-14	down
HGS	3387.02	-1.09346	0.1389	3.48e-15	4.82e-14	down
FOS	1668.79	4.63363	0.588676	3.51e-15	4.85e-14	up
ZNF740	3981.5	0.473994	0.0602274	3.54e-15	4.9e-14	up
JRKL	903.307	0.934082	0.118776	3.71e-15	5.13e-14	up
CINP	2338.8	-0.889565	0.113124	3.73e-15	5.15e-14	down
GOLT1B	2657.86	1.41951	0.180603	3.85e-15	5.3e-14	up
DCAF16	1467.37	0.68702	0.0874517	3.97e-15	5.47e-14	up
KLF10	2776.54	1.56517	0.199279	4.02e-15	5.54e-14	up
CALM1	14621.8	-0.916818	0.116735	4.03e-15	5.55e-14	down
IFRD2	4955.37	-1.08508	0.138162	4.04e-15	5.55e-14	down
ALPK1	305.9	1.44174	0.183582	4.05e-15	5.57e-14	up
NTSR1	28.9187	-3.73518	0.475671	4.08e-15	5.6e-14	down
C19orf47	453.228	-1.18449	0.150902	4.18e-15	5.74e-14	down
AK310041	27.4358	4.60373	0.586523	4.19e-15	5.74e-14	up
ABHD16A	1160.5	-0.943391	0.120191	4.19e-15	5.74e-14	down
CASKIN2	534.4	-1.19592	0.152391	4.24e-15	5.8e-14	down
DKFZp451F083	90.4135	1.43163	0.182429	4.24e-15	5.8e-14	up
UBL7	1581.32	-0.706579	0.0900548	4.29e-15	5.87e-14	down
OXR1	1277.42	0.810684	0.103359	4.39e-15	6e-14	up
CAB39L	397.98	-1.45111	0.185024	4.41e-15	6.02e-14	down
LANCL2	1228.02	-1.65292	0.210785	4.44e-15	6.07e-14	down
UBXN11	525.753	-0.961015	0.122555	4.45e-15	6.07e-14	down
PGAM5	4274.54	-0.792347	0.101087	4.57e-15	6.23e-14	down
RPF2	5212.42	-1.035	0.132052	4.58e-15	6.24e-14	down
CHMP1A	2584.59	-0.880208	0.112304	4.59e-15	6.24e-14	down
BCR	3487.71	-0.689948	0.0880343	4.6e-15	6.26e-14	down
AURKB	4556.34	-0.606448	0.0773852	4.62e-15	6.29e-14	down
CIZ1	6075.96	-0.848976	0.108334	4.63e-15	6.29e-14	down
TMEM206	1117.83	0.596941	0.0761998	4.73e-15	6.42e-14	up
MEX3A	822.202	0.925454	0.118146	4.76e-15	6.46e-14	up
ALS2CR8	136.809	1.43551	0.183317	4.85e-15	6.58e-14	up
GRHPR	3705.39	-0.709046	0.090549	4.86e-15	6.58e-14	down
CAPS2	84.9116	1.96166	0.250607	4.97e-15	6.73e-14	up
TUBG1	5684.4	-0.635607	0.0812108	5.01e-15	6.78e-14	down
C18orf54	327.157	1.01893	0.130227	5.11e-15	6.91e-14	up
PTPN12	3477.87	0.612016	0.0782353	5.17e-15	6.98e-14	up
ZNF48	533.538	-1.18929	0.152072	5.26e-15	7.1e-14	down
C17orf103	113.214	2.02105	0.258448	5.28e-15	7.13e-14	up
POLD1	2724.75	-1.15951	0.148348	5.45e-15	7.35e-14	down
BBIP1	578.562	0.860467	0.110092	5.46e-15	7.36e-14	up
SIGMAR1	13204.7	-0.590006	0.0755321	5.66e-15	7.62e-14	down
MRPL54	1209.28	-1.03915	0.133064	5.75e-15	7.73e-14	down
PYGB	2140.78	-0.979337	0.125407	5.75e-15	7.74e-14	down
TTC14	2341.9	1.07381	0.137511	5.77e-15	7.75e-14	up
HARS	7608.68	-0.787714	0.100888	5.82e-15	7.82e-14	down
METTL17	3776.83	-0.598577	0.0766797	5.89e-15	7.91e-14	down
MON2	2466.4	0.852155	0.109174	5.93e-15	7.95e-14	up
AP5S1	314.955	-0.883715	0.113223	5.95e-15	7.97e-14	down
KBTBD7	338.95	0.804887	0.103146	6.03e-15	8.08e-14	up
ORAI1	677.785	-1.09187	0.13993	6.05e-15	8.1e-14	down
IGFBP4	94.9672	1.72117	0.220586	6.06e-15	8.11e-14	up
LINC00478	406.137	0.78606	0.100743	6.06e-15	8.11e-14	up
MTFR1	2336.29	0.501649	0.064295	6.08e-15	8.12e-14	up
ZNF444	458.26	-0.95306	0.122181	6.17e-15	8.24e-14	down
NUDT22	906.443	-0.974887	0.124999	6.23e-15	8.32e-14	down
NOP14-AS1	76.2749	-1.52642	0.195719	6.24e-15	8.32e-14	down
ILKAP	994.464	-1.01462	0.130127	6.33e-15	8.44e-14	down
HEXDC	379.578	-1.17641	0.150909	6.41e-15	8.54e-14	down
C12orf66	309.036	0.955215	0.122551	6.47e-15	8.61e-14	up
KAT5	1910.71	-0.702661	0.0901556	6.5e-15	8.65e-14	down
MSL1	4138.72	0.565479	0.0725734	6.61e-15	8.78e-14	up
NLRP1	4596.6	1.19174	0.152966	6.65e-15	8.84e-14	up
FAM86DP	367.823	-1.08519	0.139311	6.72e-15	8.92e-14	down
ANKRD29	1241.83	1.14041	0.14643	6.8e-15	9.03e-14	up
ZXDC	2592.01	0.627951	0.0806674	7e-15	9.29e-14	up
IDH1	9541.9	0.727059	0.093416	7.08e-15	9.38e-14	up
AK128439	578.47	-1.32768	0.170613	7.15e-15	9.47e-14	down
ZNF219	352.1	-1.05364	0.135402	7.16e-15	9.48e-14	down
TMEM159	273.799	1.20828	0.155281	7.18e-15	9.5e-14	up
PPCDC	326.336	-0.824867	0.106051	7.37e-15	9.74e-14	down
MRPL20	3618.38	-1.02417	0.131716	7.51e-15	9.92e-14	down
TBC1D13	2189.08	-0.692885	0.0891174	7.55e-15	9.96e-14	down
PSMC6	4386.61	-1.32183	0.17004	7.63e-15	1.01e-13	down
ZNF678	476.234	1.14399	0.147174	7.66e-15	1.01e-13	up
RCC1	6572.66	-1.03407	0.133035	7.67e-15	1.01e-13	down
CLPTM1L	10305.2	-0.876725	0.112799	7.7e-15	1.01e-13	down
UST	944.623	1.83043	0.235624	7.95e-15	1.05e-13	up
COL6A1	948.52	-1.50044	0.193163	7.99e-15	1.05e-13	down
COPRS	2063.79	-0.922201	0.118738	8.06e-15	1.06e-13	down
CCDC124	1489.69	-1.30299	0.167774	8.08e-15	1.06e-13	down
AFAP1	3304.62	0.94942	0.12226	8.13e-15	1.07e-13	up
SNHG3	8560.43	0.936067	0.120543	8.14e-15	1.07e-13	up
DLST	6934.9	-0.527337	0.0679164	8.2e-15	1.07e-13	down
MRPL43	1973.24	-0.58925	0.0758957	8.23e-15	1.08e-13	down
L1CAM	3166.96	-1.22902	0.158325	8.32e-15	1.09e-13	down
HN1	7118.2	-1.03101	0.132839	8.4e-15	1.1e-13	down
KDM1B	1491.89	0.688676	0.0887319	8.41e-15	1.1e-13	up
ABCA8	148.425	1.28681	0.165811	8.45e-15	1.1e-13	up
CHAF1A	3914.11	-0.648332	0.0835428	8.46e-15	1.1e-13	down
ACTL8	149.342	-2.57159	0.331414	8.53e-15	1.11e-13	down
SLC9A3R2	1766.1	-1.08132	0.139383	8.63e-15	1.13e-13	down
FLJ00277	53.7838	-1.97034	0.254039	8.76e-15	1.14e-13	down
S100A3	129.7	-1.6805	0.216683	8.8e-15	1.15e-13	down
ELMSAN1	1329.93	-0.799597	0.103109	8.85e-15	1.15e-13	down
FZR1	1045.73	-1.00796	0.130015	9e-15	1.17e-13	down
CAMK4	189.746	1.32947	0.171549	9.2e-15	1.2e-13	up
ZC3H3	880.407	-1.27294	0.16426	9.22e-15	1.2e-13	down
ZGLP1	41.2598	-2.20336	0.284346	9.27e-15	1.2e-13	down
ZNF787	658.516	-1.41412	0.182591	9.58e-15	1.24e-13	down
EVPL	781.213	-1.04647	0.135152	9.72e-15	1.26e-13	down
GAPDH	228444	-0.620653	0.0801688	9.8e-15	1.27e-13	down
NEURL4	1905.93	-0.843982	0.109017	9.81e-15	1.27e-13	down
F11R	2622.42	1.00139	0.129441	1.02e-14	1.33e-13	up
SLC9A1	608.171	-0.891028	0.11518	1.03e-14	1.33e-13	down
MYBBP1A	7455.94	-1.31475	0.17006	1.07e-14	1.38e-13	down
C9orf156	431.893	-1.04394	0.135086	1.09e-14	1.41e-13	down
CSNK1G3	1867.23	0.785877	0.101731	1.12e-14	1.44e-13	up
RBM38	930.69	-1.16614	0.150983	1.13e-14	1.46e-13	down
SFPQ	15448.8	-0.840502	0.108841	1.14e-14	1.47e-13	down
ZWINT	5548.26	-0.830819	0.107594	1.15e-14	1.48e-13	down
ARFGAP3	1704.7	1.82995	0.236989	1.15e-14	1.48e-13	up
CTGF	4313.8	3.97443	0.51494	1.18e-14	1.52e-13	up
COMTD1	378.574	-1.18166	0.153161	1.21e-14	1.55e-13	down
ZNF217	1247.54	0.661938	0.0858225	1.23e-14	1.58e-13	up
KRT81	218.244	-4.87852	0.63252	1.23e-14	1.58e-13	down
PEX2	1466.2	0.642563	0.0833258	1.24e-14	1.6e-13	up
MRPL34	1689.3	-0.810312	0.105081	1.25e-14	1.6e-13	down
EPB41L4A	476.648	1.48492	0.192597	1.26e-14	1.61e-13	up
XBP1	5756.8	1.08989	0.141413	1.29e-14	1.65e-13	up
C18orf25	1227.5	0.663366	0.086152	1.36e-14	1.74e-13	up
VPS13D	2362.69	0.787756	0.102312	1.37e-14	1.75e-13	up
GFM2	3702.58	0.513301	0.0666886	1.39e-14	1.78e-13	up
DNAJB1	7919.46	-0.896031	0.116436	1.41e-14	1.8e-13	down
LRP12	483.722	0.947914	0.123204	1.43e-14	1.82e-13	up
LAS1L	6019.5	-0.645403	0.0838872	1.43e-14	1.82e-13	down
ARID5A	269.078	-1.47664	0.191958	1.44e-14	1.84e-13	down
NPEPL1	1344.55	-0.909024	0.11818	1.45e-14	1.85e-13	down
STOML2	5255.24	-0.874727	0.113728	1.46e-14	1.85e-13	down
UAP1L1	1481.21	-0.708664	0.0921692	1.49e-14	1.89e-13	down
TSEN54	1391.98	-0.589998	0.0767603	1.52e-14	1.93e-13	down
GPR126	2556.51	0.774503	0.100791	1.54e-14	1.96e-13	up
RNASEH2A	4355.75	-0.607226	0.0790362	1.56e-14	1.98e-13	down
BTN3A3	1330.44	1.02103	0.132913	1.57e-14	1.99e-13	up
TRMU	2494.97	-0.851243	0.110854	1.6e-14	2.04e-13	down
SLC12A9	1335.84	-1.06905	0.139221	1.61e-14	2.04e-13	down
GCDH	1655.8	-0.65884	0.0858404	1.65e-14	2.09e-13	down
UPF1	4214.7	-1.03902	0.135402	1.67e-14	2.12e-13	down
PAF1	3104.8	-0.875129	0.114045	1.67e-14	2.12e-13	down
SPARCL1	26.0605	3.93731	0.51312	1.68e-14	2.12e-13	up
MRPL2	2712.26	-0.571928	0.0745525	1.7e-14	2.15e-13	down
USP25	2141.18	0.578055	0.075372	1.73e-14	2.18e-13	up
EVI5	714.118	0.648995	0.0846245	1.73e-14	2.19e-13	up
VPS13C	1434.54	0.833537	0.108733	1.78e-14	2.24e-13	up
PTER	498.999	0.716479	0.0934642	1.78e-14	2.24e-13	up
ABCF2	8270.02	-1.10103	0.143716	1.84e-14	2.32e-13	down
CFH	2488.53	1.53377	0.200316	1.91e-14	2.4e-13	up
MGAT2	1334.08	-0.852265	0.111324	1.92e-14	2.42e-13	down
TLR3	225.789	1.28761	0.168199	1.93e-14	2.43e-13	up
LOC339803	665.934	0.770381	0.100635	1.93e-14	2.43e-13	up
CSTF2	2622.87	-0.913953	0.1194	1.94e-14	2.44e-13	down
GNG4	1600.28	-0.830674	0.108555	1.98e-14	2.48e-13	down
OSBPL10	3364.27	0.70007	0.0915269	2.03e-14	2.55e-13	up
ANAPC2	2038.91	-0.969181	0.12681	2.13e-14	2.67e-13	down
LRFN4	1962.9	-1.53794	0.201235	2.13e-14	2.67e-13	down
MZT2A	384.709	-1.31181	0.171677	2.15e-14	2.7e-13	down
CDC20	8812.29	-0.990538	0.129662	2.18e-14	2.73e-13	down
ACSM3	44.7283	2.54472	0.333188	2.21e-14	2.77e-13	up
ENTPD4	3239.84	0.97808	0.128078	2.23e-14	2.79e-13	up
MRPL55	1030.22	-0.961108	0.125878	2.25e-14	2.82e-13	down
MRPL27	2982.52	-0.764231	0.100102	2.27e-14	2.83e-13	down
TRAF5	1235.74	1.07909	0.141414	2.34e-14	2.92e-13	up
MCM3	18614.4	-0.448919	0.0588498	2.38e-14	2.97e-13	down
HIGD2A	3293.18	-0.618198	0.0810476	2.39e-14	2.98e-13	down
PITPNM3	193.256	-1.23384	0.161777	2.41e-14	3e-13	down
SASH1	264.293	0.850172	0.111475	2.41e-14	3e-13	up
ZNF213	253.891	-1.00011	0.131164	2.44e-14	3.04e-13	down
PAR5	191.204	1.64752	0.216086	2.45e-14	3.05e-13	up
NIPA1	1547.91	0.738873	0.09692	2.47e-14	3.07e-13	up
PTN	24.9641	-3.30555	0.433631	2.48e-14	3.08e-13	down
METTL13	2789.66	-0.878015	0.115193	2.5e-14	3.1e-13	down
IGSF1	200.073	1.28734	0.168967	2.56e-14	3.17e-13	up
GMEB2	1046.12	-0.708018	0.0929316	2.56e-14	3.18e-13	down
CDC42EP1	3000.13	-1.01026	0.132609	2.57e-14	3.18e-13	down
METTL21A	1558.33	0.621085	0.0815556	2.63e-14	3.25e-13	up
DAXX	4316.19	-0.469469	0.0616689	2.68e-14	3.32e-13	down
HEXIM1	2871.02	-0.704141	0.0925029	2.7e-14	3.34e-13	down
DQ591995	678.849	1.21244	0.159313	2.73e-14	3.38e-13	up
TIMM9	1386.32	-0.706222	0.0927994	2.74e-14	3.38e-13	down
DDX24	17104.4	-0.817525	0.107429	2.74e-14	3.39e-13	down
MIIP	498.742	-1.24293	0.163332	2.74e-14	3.39e-13	down
BEND3	862.774	-1.29923	0.170759	2.77e-14	3.42e-13	down
AKR7A2	1343.93	-0.803201	0.105571	2.78e-14	3.43e-13	down
ENDOG	887.536	-0.783457	0.102983	2.79e-14	3.44e-13	down
NR2C1	1463.13	0.782569	0.102892	2.83e-14	3.49e-13	up
TM9SF1	1588.04	-0.9364	0.123125	2.84e-14	3.5e-13	down
DHX30	6378.06	-0.907375	0.119316	2.85e-14	3.51e-13	down
CYB5R3	4769.45	-0.679535	0.0893835	2.91e-14	3.57e-13	down
AP2M1	18380.6	-0.847126	0.111502	3.02e-14	3.71e-13	down
C11orf48	2535.54	-0.599143	0.078875	3.05e-14	3.75e-13	down
RNMT	3336.43	0.449098	0.0591304	3.08e-14	3.77e-13	up
SERTAD2	1245.17	0.788298	0.10382	3.13e-14	3.83e-13	up
TUBE1	1662.2	0.88918	0.117157	3.21e-14	3.93e-13	up
EME1	1875.68	1.08994	0.143627	3.23e-14	3.95e-13	up
LETM1	3104.9	-0.713316	0.0940245	3.29e-14	4.02e-13	down
AHNAK2	13717.9	-0.760407	0.100296	3.41e-14	4.17e-13	down
FCGR2A	145.238	1.8553	0.244718	3.42e-14	4.18e-13	up
CNN2	7959.89	-0.740056	0.0976226	3.43e-14	4.19e-13	down
RABGAP1L	681.972	0.658037	0.0868282	3.49e-14	4.26e-13	up
SECISBP2L	1060.45	0.876363	0.115644	3.51e-14	4.28e-13	up
LINC00657	11337.7	0.970642	0.128086	3.51e-14	4.28e-13	up
RBFOX2	5868.92	0.499514	0.0659228	3.53e-14	4.3e-13	up
KIF26A	1545.13	-1.21817	0.160768	3.53e-14	4.3e-13	down
TM4SF1	5218.98	0.774058	0.102165	3.55e-14	4.32e-13	up
VLDLR	480.966	1.83734	0.242521	3.56e-14	4.33e-13	up
MANEAL	882.479	-1.26974	0.167683	3.67e-14	4.46e-13	down
C12orf76	370.6	0.993695	0.131238	3.68e-14	4.48e-13	up
PPAN	280.345	-1.54033	0.203511	3.77e-14	4.57e-13	down
TMCC3	180.634	1.89888	0.250905	3.79e-14	4.6e-13	up
WBSCR22	8094.6	-0.647762	0.0856049	3.82e-14	4.64e-13	down
REXO1	800.706	-1.1737	0.155204	3.96e-14	4.8e-13	down
FEM1B	2000.15	0.701775	0.0928187	4.01e-14	4.86e-13	up
PUS1	2134.56	-1.06363	0.140712	4.06e-14	4.92e-13	down
GJC1	987.252	0.882838	0.116828	4.13e-14	5e-13	up
ZBTB48	407.543	-0.887771	0.117495	4.16e-14	5.03e-13	down
FBXO36	96.0153	2.12544	0.281358	4.21e-14	5.09e-13	up
MUL1	908.891	-0.760313	0.100775	4.53e-14	5.47e-13	down
ZNF707	338.105	-1.11521	0.147872	4.64e-14	5.6e-13	down
MYT1L	102.077	1.35313	0.17958	4.88e-14	5.89e-13	up
NPHP3	460.695	0.860008	0.114142	4.9e-14	5.91e-13	up
AK090688	356.305	2.00975	0.266779	4.94e-14	5.96e-13	up
ELAC2	7063.91	-0.721034	0.0957501	5.06e-14	6.09e-13	down
PLP2	12420.3	-0.917455	0.121844	5.08e-14	6.12e-13	down
NELFB	3946.82	-0.775802	0.10311	5.31e-14	6.39e-13	down
PRRG1	690.682	0.714052	0.0949183	5.36e-14	6.44e-13	up
UCKL1	1507.86	-0.848075	0.112759	5.43e-14	6.52e-13	down
PHF23	2701.96	-0.809069	0.107591	5.48e-14	6.58e-13	down
CENPJ	1616.65	0.70829	0.0942012	5.52e-14	6.63e-13	up
HBP1	1502.25	1.58007	0.210328	5.81e-14	6.96e-13	up
MATK	1080.55	-1.36218	0.181354	5.86e-14	7.02e-13	down
CEP57	4818.27	0.477663	0.0636503	6.17e-14	7.39e-13	up
GSK3A	2721.5	-0.747553	0.0996189	6.18e-14	7.4e-13	down
LAMTOR1	2434.76	-0.870834	0.116056	6.21e-14	7.43e-13	down
SHROOM1	823.77	-0.84144	0.112212	6.45e-14	7.71e-13	down
GFER	824.117	-0.736816	0.0982786	6.52e-14	7.79e-13	down
HSPB1	9391.48	-0.979866	0.130742	6.65e-14	7.94e-13	down
C4orf29	526.316	0.672257	0.0897183	6.73e-14	8.04e-13	up
MYH9	23826.7	-0.993735	0.132642	6.79e-14	8.1e-13	down
DOHH	381.993	-1.72878	0.2308	6.87e-14	8.19e-13	down
2009-09-01	8971.88	-0.862491	0.115166	6.94e-14	8.26e-13	down
ADI1	2409.84	-1.06936	0.142811	7e-14	8.33e-13	down
BC040577	188.636	1.26005	0.168289	7.02e-14	8.36e-13	up
LACC1	136.548	1.49212	0.199286	7.03e-14	8.36e-13	up
HDHD3	652.705	-0.720603	0.0962796	7.18e-14	8.54e-13	down
ITPA	1999.28	-0.776594	0.103782	7.27e-14	8.64e-13	down
ARHGAP27	1063.68	-0.537625	0.0718531	7.3e-14	8.67e-13	down
DNAJB14	743.322	0.892478	0.119322	7.46e-14	8.85e-13	up
VPS28	1033.23	-0.675166	0.0902772	7.5e-14	8.89e-13	down
TTC5	566.117	-1.07773	0.144111	7.52e-14	8.91e-13	down
SFXN5	1014.26	-0.944598	0.126319	7.55e-14	8.95e-13	down
SMARCA2	26.8138	-2.96545	0.396818	7.84e-14	9.28e-13	down
PPM1G	9568.78	-0.517299	0.0692337	7.91e-14	9.36e-13	down
P2RY6	77.2374	1.83366	0.245462	8.01e-14	9.47e-13	up
LOC286437	116.779	1.87116	0.250514	8.06e-14	9.53e-13	up
ZNF362	252.022	-1.44544	0.193538	8.11e-14	9.58e-13	down
NACC2	1535.85	-0.743822	0.0996083	8.18e-14	9.65e-13	down
BANF1	10640.8	-0.686979	0.0919977	8.18e-14	9.65e-13	down
HIST2H2BE	339.682	0.992659	0.132952	8.25e-14	9.72e-13	up
EIF4G1	35701.4	-1.03145	0.138199	8.42e-14	9.93e-13	down
NUCB2	1938.89	1.28885	0.172744	8.59e-14	1.01e-12	up
FERMT2	3701.12	-0.942849	0.126372	8.6e-14	1.01e-12	down
HMG20A	721.386	0.726693	0.0974026	8.61e-14	1.01e-12	up
SNORD60	195.752	-1.24141	0.16641	8.66e-14	1.02e-12	down
SNX25	1120.37	0.787523	0.105584	8.74e-14	1.03e-12	up
TUBB	96578.6	-0.903181	0.1211	8.77e-14	1.03e-12	down
TMEM41B	1840.54	0.960375	0.12877	8.78e-14	1.03e-12	up
VWDE	1002.68	1.10717	0.148464	8.82e-14	1.03e-12	up
POLRMT	2277.17	-0.907879	0.12175	8.86e-14	1.04e-12	down
C6orf120	901.832	0.926083	0.124227	9e-14	1.06e-12	up
BC028022	47.1954	2.03259	0.272688	9.06e-14	1.06e-12	up
ZNF791	1064.48	1.0728	0.143931	9.09e-14	1.06e-12	up
GINS3	1038.91	-0.730159	0.0979649	9.11e-14	1.06e-12	down
SLC35E2B	1996.77	0.70557	0.0947	9.29e-14	1.09e-12	up
WIZ	1766.89	-1.23953	0.166369	9.3e-14	1.09e-12	down
ASNA1	2949.15	-0.939075	0.126058	9.37e-14	1.09e-12	down
NGRN	844.466	-0.72458	0.097274	9.42e-14	1.1e-12	down
AP2B1	26283.9	0.460478	0.0618333	9.54e-14	1.11e-12	up
TTC28	1231.33	0.524611	0.0704675	9.71e-14	1.13e-12	up
CR936688	719.411	1.04346	0.140167	9.74e-14	1.13e-12	up
SLC11A2	6847.7	0.825101	0.110847	9.8e-14	1.14e-12	up
CENPM	996.925	-1.0599	0.142394	9.81e-14	1.14e-12	down
HNRNPU-AS1	4376.05	1.08821	0.146205	9.84e-14	1.14e-12	up
SAP30BP	1831.01	-0.691327	0.0928837	9.85e-14	1.14e-12	down
TMEM161A	1487.4	-0.918622	0.123491	1.02e-13	1.18e-12	down
RPP21	166.656	-1.4891	0.200201	1.02e-13	1.19e-12	down
APRT	7170.88	-0.763942	0.102743	1.04e-13	1.21e-12	down
ABHD2	1380.51	0.544865	0.0732874	1.05e-13	1.22e-12	up
DQ591785	222.497	1.41593	0.190569	1.09e-13	1.26e-12	up
MYCBPAP	60.0265	2.73885	0.368676	1.1e-13	1.27e-12	up
AK057887	625.001	1.16894	0.157358	1.1e-13	1.27e-12	up
DPP9	3823.2	-0.946931	0.127505	1.11e-13	1.29e-12	down
MEA1	2433.51	-1.09873	0.147958	1.12e-13	1.29e-12	down
FUZ	64.9662	-1.78058	0.239822	1.13e-13	1.31e-12	down
WDR11	3807.81	0.561187	0.0755892	1.13e-13	1.31e-12	up
GPR107	2241.33	0.821037	0.110629	1.16e-13	1.34e-12	up
CCNT1	4844.97	0.653546	0.0880761	1.17e-13	1.35e-12	up
PTBP1	15697.7	-1.06574	0.14364	1.18e-13	1.36e-12	down
SLC35A4	7062.12	-0.826485	0.111443	1.21e-13	1.39e-12	down
CCSER2	1100.84	0.657517	0.0887127	1.25e-13	1.44e-12	up
QTRT1	1428.94	-1.04958	0.141617	1.25e-13	1.44e-12	down
FADD	1319.22	-0.838621	0.113236	1.3e-13	1.5e-12	down
AX746967	306.748	0.945995	0.127736	1.3e-13	1.5e-12	up
MRPL11	4410.96	-0.795819	0.107475	1.31e-13	1.51e-12	down
CDK4	10065.6	-0.897457	0.121224	1.33e-13	1.53e-12	down
LPIN2	1590.96	0.680557	0.0920061	1.39e-13	1.6e-12	up
IL15	95.4465	1.61576	0.218452	1.4e-13	1.6e-12	up
HM13	6942.41	-0.552102	0.0746518	1.41e-13	1.61e-12	down
GNRHR2	109.867	1.91168	0.258508	1.41e-13	1.62e-12	up
POLDIP2	6994.22	-0.833741	0.11276	1.43e-13	1.63e-12	down
NDUFA13	1507.48	-0.909467	0.123015	1.43e-13	1.64e-12	down
ZFP41	260.984	-1.11956	0.151506	1.47e-13	1.69e-12	down
BTN3A2	2921.92	0.903051	0.122249	1.5e-13	1.72e-12	up
RPTOR	1684.04	-1.30131	0.176173	1.51e-13	1.72e-12	down
FOXP4	1895.55	-0.781003	0.105742	1.51e-13	1.73e-12	down
TJAP1	1290.73	-0.644527	0.0872679	1.52e-13	1.73e-12	down
CHDH	690.997	-1.03588	0.140264	1.52e-13	1.74e-12	down
ARRDC4	186.575	1.60934	0.217915	1.52e-13	1.74e-12	up
ENTHD2	847.494	-0.883391	0.119622	1.53e-13	1.74e-12	down
PTPN4	1192.42	0.658414	0.0891796	1.55e-13	1.76e-12	up
MCM7	25510	-0.650541	0.0881217	1.56e-13	1.77e-12	down
NR2F6	1732.85	-0.669285	0.0906643	1.56e-13	1.77e-12	down
TONSL	1432.57	-1.22664	0.166171	1.56e-13	1.78e-12	down
MED11	799.473	-0.756561	0.102515	1.58e-13	1.8e-12	down
BMPR1B	366.496	0.84255	0.114264	1.66e-13	1.89e-12	up
NLK	679.582	0.658124	0.089264	1.67e-13	1.9e-12	up
GK	782.895	0.657761	0.0892155	1.67e-13	1.9e-12	up
PXN	5708.58	-0.919603	0.124732	1.67e-13	1.9e-12	down
TMEM201	907.699	-1.27979	0.173621	1.69e-13	1.92e-12	down
GUSBP1	471.663	-1.18883	0.161298	1.7e-13	1.93e-12	down
HP1BP3	7570.04	0.507261	0.0688452	1.73e-13	1.96e-12	up
AP2A2	1361.86	-0.571202	0.0775251	1.73e-13	1.96e-12	down
CCNI	6315.14	0.443228	0.0601774	1.77e-13	2e-12	up
ADIPOR2	6859.3	0.380188	0.0516479	1.82e-13	2.06e-12	up
MR1	637.952	1.33359	0.181196	1.84e-13	2.08e-12	up
KIAA1211	1062.23	0.72992	0.0991965	1.86e-13	2.1e-12	up
GPATCH3	374.313	-0.842591	0.114593	1.94e-13	2.19e-12	down
DNAJC15	1160.56	-0.762192	0.10367	1.95e-13	2.2e-12	down
FABP5	4215.99	-1.21906	0.165814	1.95e-13	2.2e-12	down
PTPDC1	527.984	0.770164	0.104758	1.96e-13	2.2e-12	up
ASCC2	2673.91	-0.729953	0.0992967	1.96e-13	2.21e-12	down
C6orf57	228.561	1.25601	0.170864	1.97e-13	2.21e-12	up
SMAD3	2639.31	0.758265	0.103162	1.98e-13	2.23e-12	up
WDR83	618.559	-0.824025	0.112157	2.03e-13	2.28e-12	down
CA5B	444.735	1.20704	0.164289	2.03e-13	2.28e-12	up
TXN2	3294.04	-0.667198	0.0908295	2.05e-13	2.3e-12	down
ZNF576	461.199	-0.93215	0.126904	2.05e-13	2.3e-12	down
LOC338799	520.825	1.10987	0.15111	2.06e-13	2.31e-12	up
CD3EAP	2029.92	-1.43745	0.195731	2.07e-13	2.32e-12	down
MAP1S	478.121	-1.33127	0.181303	2.09e-13	2.34e-12	down
TESK2	258.942	1.51789	0.206815	2.15e-13	2.4e-12	up
VPS52	3007.8	-0.555419	0.0757022	2.19e-13	2.45e-12	down
CLUH	7486.75	-1.36622	0.186219	2.19e-13	2.45e-12	down
C1orf56	250.128	-0.859958	0.117241	2.22e-13	2.48e-12	down
C10orf91	122.596	-1.32345	0.18055	2.3e-13	2.57e-12	down
SLC25A40	647.425	1.12193	0.153076	2.31e-13	2.58e-12	up
ZSWIM6	799.112	0.810445	0.110578	2.32e-13	2.58e-12	up
YEATS2	2227.42	0.480181	0.0655196	2.32e-13	2.59e-12	up
SNX24	606.126	1.04296	0.142371	2.38e-13	2.65e-12	up
LYRM1	663.727	0.812495	0.110924	2.39e-13	2.67e-12	up
DPF1	201.982	-1.00514	0.137227	2.4e-13	2.67e-12	down
ABHD11	914.208	-0.762182	0.10406	2.4e-13	2.67e-12	down
RNF103	624.788	0.755638	0.103193	2.43e-13	2.71e-12	up
LOC100652772	627.53	0.764618	0.104464	2.49e-13	2.77e-12	up
FECH	1432.32	0.501321	0.0684931	2.49e-13	2.77e-12	up
CACTIN-AS1	81.7292	2.61131	0.35684	2.52e-13	2.8e-12	up
FLII	7439.68	-0.521494	0.0712733	2.54e-13	2.82e-12	down
GOLPH3L	1491.61	0.624132	0.0853015	2.54e-13	2.82e-12	up
FLNA	54328.6	-1.46167	0.199889	2.62e-13	2.91e-12	down
EMC6	1009.12	-0.797404	0.109051	2.63e-13	2.91e-12	down
IRX4	99.677	-2.20883	0.30209	2.64e-13	2.92e-12	down
PSD2	51.9953	3.10512	0.424803	2.68e-13	2.97e-12	up
TUBA1B	61031.4	-0.953686	0.130577	2.8e-13	3.1e-12	down
DVL2	2217.39	-0.670425	0.0918401	2.88e-13	3.18e-12	down
FCHSD2	1528.93	0.59104	0.0809799	2.91e-13	3.21e-12	up
ZYG11A	1447.42	0.551983	0.075637	2.93e-13	3.23e-12	up
RAD51-AS1	134.017	1.74429	0.239032	2.94e-13	3.24e-12	up
EIF4G3	5050.69	0.500761	0.068641	2.98e-13	3.29e-12	up
LARP1B	1567.17	0.543136	0.0744621	3.01e-13	3.31e-12	up
CC2D1B	2194.66	-0.512767	0.0703028	3.02e-13	3.32e-12	down
ITM2B	3111.13	0.463396	0.0635411	3.03e-13	3.34e-12	up
KDELR3	3140.92	1.3784	0.189009	3.04e-13	3.34e-12	up
PDRG1	1407.03	-0.677378	0.0929058	3.08e-13	3.38e-12	down
FTSJ1	3725.31	-0.738095	0.10124	3.09e-13	3.39e-12	down
ZNF33A	2033.53	0.797979	0.109469	3.11e-13	3.42e-12	up
COX10-AS1	356.815	0.894185	0.1227	3.16e-13	3.47e-12	up
PSMC5	9031.24	-1.03076	0.14147	3.19e-13	3.5e-12	down
RBMS2	2787.18	0.67699	0.0929319	3.22e-13	3.54e-12	up
KIAA1704	767.095	0.698016	0.0958324	3.25e-13	3.56e-12	up
TPRA1	921.519	-0.67621	0.0928543	3.28e-13	3.59e-12	down
DOCK3	49.5683	-2.51667	0.345608	3.29e-13	3.61e-12	down
TGFBR3	465.166	0.660197	0.0906875	3.34e-13	3.66e-12	up
AAR2	2667.25	-1.0102	0.138766	3.34e-13	3.66e-12	down
LAMTOR4	2293.48	-0.690141	0.094814	3.37e-13	3.68e-12	down
ZNF254	502.72	0.837592	0.11509	3.4e-13	3.71e-12	up
MOB2	250.697	-0.949272	0.130459	3.43e-13	3.75e-12	down
C1orf21	352.774	1.33782	0.183878	3.45e-13	3.77e-12	up
INTS5	1230.82	-1.15248	0.158411	3.46e-13	3.78e-12	down
MRPS18A	1835.29	-0.638172	0.0877307	3.48e-13	3.8e-12	down
ZSCAN5A	385.976	-1.18252	0.162686	3.63e-13	3.96e-12	down
APOLD1	49.213	1.9108	0.262934	3.67e-13	4e-12	up
MIR4712	38.8371	2.98579	0.410875	3.68e-13	4.01e-12	up
HSP90AB1	170779	-0.848496	0.116765	3.68e-13	4.01e-12	down
VPS37B	1153.63	-0.823155	0.1133	3.72e-13	4.05e-12	down
C11orf24	2552.43	-0.82033	0.112939	3.77e-13	4.1e-12	down
MYL6B	1928.28	-0.566746	0.0780366	3.8e-13	4.13e-12	down
GTDC2	536.069	-0.803946	0.110733	3.86e-13	4.2e-12	down
KIAA0355	490.354	0.807384	0.111209	3.87e-13	4.2e-12	up
SH3BGRL2	449.368	0.863621	0.118976	3.91e-13	4.24e-12	up
PLEC	11589.8	-1.74064	0.239803	3.91e-13	4.24e-12	down
NACC1	4720.07	-1.02608	0.141362	3.91e-13	4.24e-12	down
CNOT8	3655.04	0.636921	0.0877589	3.94e-13	4.27e-12	up
TTC1	2900.14	-1.06436	0.146676	3.97e-13	4.3e-12	down
ERAP1	1433.58	0.682402	0.0940636	4.03e-13	4.36e-12	up
FAM120C	751.48	-0.839219	0.115685	4.04e-13	4.37e-12	down
TMEM203	1862.69	-0.697317	0.0961827	4.17e-13	4.51e-12	down
AASDH	556.869	0.636936	0.0878583	4.18e-13	4.52e-12	up
MCTP2	153.464	1.32599	0.182986	4.28e-13	4.62e-12	up
PPIC	1474.78	1.09496	0.151138	4.33e-13	4.67e-12	up
EWSR1	17823	-0.685599	0.0946426	4.35e-13	4.7e-12	down
FHOD1	3434.88	-0.61275	0.0845885	4.36e-13	4.7e-12	down
BEGAIN	143.555	-1.43326	0.197914	4.43e-13	4.77e-12	down
YES1	3399.31	0.789704	0.109055	4.44e-13	4.79e-12	up
CTDP1	599.713	-1.02969	0.142201	4.45e-13	4.79e-12	down
MED15	1831.34	-0.798475	0.110318	4.55e-13	4.9e-12	down
ARRDC1	1042.59	-0.926844	0.128105	4.65e-13	5e-12	down
MED23	2704.41	0.847425	0.117133	4.66e-13	5.01e-12	up
RPP40	855.623	-1.40512	0.194257	4.71e-13	5.06e-12	down
PLEKHH2	171.797	2.04874	0.283289	4.76e-13	5.11e-12	up
P2RY2	448.574	1.75547	0.242814	4.84e-13	5.19e-12	up
CA13	681.043	0.639568	0.0884675	4.85e-13	5.2e-12	up
PFAS	7297.24	-1.09783	0.151896	4.92e-13	5.27e-12	down
SLC19A2	1513.97	0.804714	0.111361	4.97e-13	5.32e-12	up
PSMA3	6362.74	-1.00106	0.138569	5.04e-13	5.4e-12	down
PRDX2	12312.7	-0.614789	0.0851018	5.04e-13	5.4e-12	down
ZNF282	1255.38	-1.04324	0.144453	5.12e-13	5.48e-12	down
NCDN	1990.75	-0.977432	0.135382	5.21e-13	5.57e-12	down
S100A10	7701.08	-1.07804	0.149345	5.26e-13	5.62e-12	down
CSGALNACT2	654.959	0.715683	0.0991911	5.39e-13	5.75e-12	up
PMP22	2258.26	-0.58358	0.0809074	5.48e-13	5.85e-12	down
GTF3C6	7035.34	-1.30901	0.181498	5.5e-13	5.87e-12	down
ZDHHC17	1309.88	0.767939	0.106503	5.57e-13	5.94e-12	up
FAM76B	703.88	0.765796	0.106252	5.7e-13	6.08e-12	up
ZNF485	270.888	-0.938322	0.130241	5.82e-13	6.2e-12	down
S100A11	12692.2	-0.989139	0.137378	6.02e-13	6.41e-12	down
POLR2A	12104.7	-0.788724	0.109549	6.03e-13	6.42e-12	down
HSD17B10	5443.99	-0.81501	0.113202	6.04e-13	6.42e-12	down
PAQR3	769.496	1.18491	0.16468	6.23e-13	6.63e-12	up
RNF126	803.419	-1.23035	0.171094	6.43e-13	6.83e-12	down
RNF24	393.338	0.995224	0.138407	6.45e-13	6.85e-12	up
TMEM55B	1299.61	-0.555377	0.077246	6.49e-13	6.89e-12	down
BST2	10921.1	-0.527078	0.0733116	6.5e-13	6.9e-12	down
NCL	55310.8	-0.99474	0.138391	6.58e-13	6.98e-12	down
RHOT2	3034.71	-1.03851	0.144494	6.61e-13	7.01e-12	down
PAPD4	1254.88	0.779699	0.108512	6.7e-13	7.1e-12	up
NUBP1	1060.76	-0.721066	0.100354	6.71e-13	7.1e-12	down
MYD88	646.033	-0.691042	0.0961833	6.74e-13	7.13e-12	down
ZBTB18	314.283	0.786407	0.109467	6.77e-13	7.16e-12	up
BCAR1	1278.52	-1.35404	0.188546	6.9e-13	7.29e-12	down
SSR3	12437.8	0.491045	0.0683772	6.9e-13	7.29e-12	up
UBN2	1449	0.733581	0.102195	7.06e-13	7.46e-12	up
PDK4	249.998	1.0109	0.140832	7.07e-13	7.46e-12	up
RAVER1	2726.11	-1.18278	0.164804	7.13e-13	7.52e-12	down
RAB8A	3305.53	-0.854696	0.119164	7.37e-13	7.77e-12	down
CFL1	45823.6	-0.869999	0.121317	7.43e-13	7.83e-12	down
MAP3K11	1382.66	-1.04884	0.146272	7.48e-13	7.87e-12	down
TDRD7	335.36	0.901176	0.125707	7.56e-13	7.96e-12	up
HYI	900.791	-0.708982	0.0989254	7.68e-13	8.08e-12	down
WDR89	860.666	-0.744897	0.103952	7.73e-13	8.13e-12	down
HMGCR	6207.61	0.959097	0.133848	7.75e-13	8.14e-12	up
ATP10D	963.749	0.718329	0.100251	7.76e-13	8.15e-12	up
AGAP2-AS1	429.191	-1.06162	0.148174	7.8e-13	8.19e-12	down
FAM203A	149.159	-1.96109	0.273782	7.89e-13	8.28e-12	down
ATPAF2	615.136	-0.615165	0.085882	7.9e-13	8.28e-12	down
MAEA	1553.1	-0.89359	0.124763	7.93e-13	8.32e-12	down
ARPC4	3991.79	-0.993956	0.138832	8.1e-13	8.49e-12	down
YARS2	1530.07	-0.663773	0.0927135	8.1e-13	8.49e-12	down
RCC2	10968.1	-0.485881	0.0678943	8.28e-13	8.67e-12	down
TAOK3	1176.78	0.590679	0.0825394	8.29e-13	8.67e-12	up
OLR1	127.074	1.91262	0.267269	8.3e-13	8.67e-12	up
TRAF3	2169.38	-0.656622	0.0917569	8.3e-13	8.67e-12	down
B3GNT9	1299.73	1.22843	0.171688	8.37e-13	8.74e-12	up
UBE2J2	2238.01	-0.791613	0.110643	8.39e-13	8.76e-12	down
SAR1A	6226.92	0.46257	0.0646595	8.43e-13	8.8e-12	up
PEX14	578.146	-0.615844	0.0860871	8.45e-13	8.81e-12	down
RFPL1S	34.3907	-6.48924	0.907253	8.51e-13	8.87e-12	down
TUSC2	1078.51	-0.803763	0.112416	8.68e-13	9.05e-12	down
TMEM150A	413.082	-0.877948	0.12283	8.82e-13	9.19e-12	down
INF2	7803.02	-0.955059	0.133626	8.85e-13	9.21e-12	down
HCP5	505.367	1.39746	0.195526	8.86e-13	9.21e-12	up
CORO2A	1711.66	0.731079	0.102297	8.9e-13	9.25e-12	up
BAG3	2649.2	-0.704827	0.0986277	8.91e-13	9.26e-12	down
MORC2	2792.31	-0.426945	0.059755	9e-13	9.35e-12	down
KIAA1107	121.328	1.98132	0.277305	9.01e-13	9.35e-12	up
ARHGAP39	361.152	-1.15817	0.162101	9.02e-13	9.36e-12	down
PPP2R4	8861.6	-0.678057	0.0949052	9.03e-13	9.36e-12	down
HNRNPM	12110.7	-1.55422	0.217576	9.11e-13	9.44e-12	down
ACTN4	17213.5	-1.10932	0.155301	9.13e-13	9.46e-12	down
SSU72	5442.59	-0.653732	0.0915227	9.14e-13	9.47e-12	down
ANKRD13A	1692.71	0.526653	0.0737418	9.21e-13	9.53e-12	up
PDCD11	8497.81	-0.883705	0.123743	9.24e-13	9.55e-12	down
PPARGC1A	568.644	0.971592	0.136107	9.44e-13	9.76e-12	up
CARM1	4496.64	-0.743972	0.104235	9.51e-13	9.82e-12	down
CHCHD10	2834.78	-0.845257	0.118465	9.67e-13	9.99e-12	down
AMY2B	861.208	1.43624	0.201328	9.76e-13	1.01e-11	up
EIF2B2	2387.37	-0.824218	0.11554	9.78e-13	1.01e-11	down
SLC10A3	953.636	-1.59008	0.222911	9.8e-13	1.01e-11	down
CXXC1	1303.93	-0.823904	0.115506	9.82e-13	1.01e-11	down
KIAA1731	3147.05	0.574692	0.0805798	9.9e-13	1.02e-11	up
DNAJB12	2136.34	-0.787005	0.110376	1e-12	1.03e-11	down
FKBP4	14773.5	-0.80534	0.112967	1.01e-12	1.04e-11	down
VRK1	3610.46	-0.552407	0.0775139	1.03e-12	1.06e-11	down
SEPT7P2	579.059	0.618609	0.0868099	1.03e-12	1.06e-11	up
CFLAR	1154.38	0.72167	0.10129	1.04e-12	1.07e-11	up
CTDSP2	4977.6	0.597821	0.0839179	1.05e-12	1.08e-11	up
COBLL1	353.541	0.875117	0.122896	1.07e-12	1.1e-11	up
XYLB	627.828	-0.98231	0.137962	1.08e-12	1.11e-11	down
ZNF587	1596.82	0.991666	0.139308	1.09e-12	1.12e-11	up
PDE2A	3454.21	-2.57804	0.36221	1.1e-12	1.13e-11	down
C1orf131	1068.16	-0.762985	0.107199	1.1e-12	1.13e-11	down
ERV3-1	288.682	0.977581	0.137388	1.12e-12	1.14e-11	up
UMPS	3010.9	-1.01425	0.142551	1.12e-12	1.15e-11	down
ZBED6	405.608	1.53575	0.215877	1.13e-12	1.15e-11	up
MAGEA1	21.4908	-4.78406	0.672541	1.13e-12	1.16e-11	down
POLE2	1324.98	-0.550133	0.0773638	1.15e-12	1.18e-11	down
TSEN34	1674.32	-0.803385	0.112999	1.16e-12	1.19e-11	down
[truncated: 18,422 more rows]
